# Supplementary material
Source: PubMed Central journal article supplement (PMC5424441)
Supplement: cs7b00737_si_001.pdf [file cs7b00737_si_001.pdf]

## Supporting Information

# Stereoselective *Cis*-Vinylcyclopropanation via Gold(I)-Catalyzed Retro-Buchner Reaction under Mild Conditions

Bart Herlé,<sup>†</sup> Philipp M. Holstein,<sup>†</sup> and Antonio M. Echavarren<sup>\*†,§</sup>

<sup>†</sup> Institute of Chemical Research of Catalonia (ICIQ), Barcelona Institute of Science and Technology, Av. Països Catalans 16, 43007 Tarragona, Spain

<sup>§</sup> Departament de Química Analítica i Química Orgànica, Universitat Rovira i Virgili, C/Marcel·li Domingo s/n, 43007 Tarragona, Spain.

**Corresponding Author**

[aechavarren@iciq.es](mailto:aechavarren@iciq.es)

|                                                                                                                    |           |
|--------------------------------------------------------------------------------------------------------------------|-----------|
| <b>1. General information.....</b>                                                                                 | <b>5</b>  |
| <b>2. Preparation of vinyl cycloheptatrienes.....</b>                                                              | <b>6</b>  |
| ( <i>E</i> )-7-Styrylcyclohepta-1,3,5-triene (1a).....                                                             | 6         |
| ( <i>E</i> )-7-(4-Methoxystyryl)cyclohepta-1,3,5-triene (1b).....                                                  | 6         |
| Potassium ( <i>E</i> )- 4-(acetyl)styryl trifluoroborate.....                                                      | 7         |
| ( <i>E</i> )-1-(4-(2-(Cyclohepta-2,4,6-trien-1-yl)vinyl)phenyl)ethan-1-one (1c).....                               | 7         |
| ( <i>E</i> )-7-(4-(Trifluoromethyl)styryl)cyclohepta-1,3,5-triene (1d).....                                        | 8         |
| ( <i>E</i> )-7-(4-Bromostyryl)cyclohepta-1,3,5-triene (1e).....                                                    | 8         |
| ( <i>E</i> )-7-(3,5-Dimethoxystyryl)cyclohepta-1,3,5-triene (1f).....                                              | 9         |
| 7-(2-Methylprop-1-en-1-yl)cyclohepta-1,3,5-triene (1g).....                                                        | 10        |
| 4-(Cyclohepta-2,4,6-trien-1-ylmethylene)tetrahydro-2 <i>H</i> -pyran (1h).....                                     | 10        |
| Potassium ( <i>E</i> )-(2-([1,1'-biphenyl]-4-yl)vinyl)trifluoroborate.....                                         | 11        |
| ( <i>E</i> )-4-(2-(Cyclohepta-2,4,6-trien-1-yl)vinyl)-1,1'-biphenyl (1i).....                                      | 11        |
| <b>3. General procedure for the gold(I)-catalyzed cyclopropanation.....</b>                                        | <b>12</b> |
| <b>4. Cyclopropanation of different olefin substrates.....</b>                                                     | <b>12</b> |
| <i>Cis</i> -( <i>E</i> )-1-methyl-3-(2-styrylcyclopropyl)benzene (3a).....                                         | 12        |
| <i>Cis</i> -(( <i>E</i> )-2-(2-phenylcyclopropyl)vinyl)benzene (3b).....                                           | 13        |
| <i>Cis</i> -1-methyl-4-(2-(( <i>E</i> )-styryl)cyclopropyl)benzene (3c).....                                       | 13        |
| <i>Cis</i> -1-chloro-4-(2-(( <i>E</i> )-styryl)cyclopropyl)benzene (3d).....                                       | 13        |
| <i>Cis</i> -1-(2-(( <i>E</i> )-styryl)cyclopropyl)-4-(trifluoromethyl)benzene (3e).....                            | 14        |
| <i>Cis</i> -( <i>E</i> )-1-fluoro-4-(2-styrylcyclopropyl)benzene (3f).....                                         | 14        |
| <i>Cis</i> -1-methoxy-4-(2-(( <i>E</i> )-styryl)cyclopropyl)benzene (3g).....                                      | 15        |
| <i>Cis</i> -( <i>E</i> )-4-(2-styrylcyclopropyl)phenyl acetate (3h).....                                           | 15        |
| <i>Cis</i> -methyl 4-(2-(( <i>E</i> )-styryl)cyclopropyl)benzoate (3i).....                                        | 16        |
| <i>Cis</i> -( <i>E</i> )-1-( <i>tert</i> -butyl)-4-(2-styrylcyclopropyl)benzene (3j).....                          | 16        |
| <i>Cis</i> -4-(2-(( <i>E</i> )-styryl)cyclopropyl)-1,1'-biphenyl (3k).....                                         | 17        |
| <i>Cis</i> -( <i>E</i> )-3-(2-styrylcyclopropyl)benzaldehyde (3l).....                                             | 17        |
| <i>Cis</i> -1-bromo-3-(2-(( <i>E</i> )-styryl)cyclopropyl)benzene (3m).....                                        | 18        |
| <i>Cis</i> -1-nitro-3-(2-(( <i>E</i> )-styryl)cyclopropyl)benzene (3n).....                                        | 18        |
| <i>Cis</i> -1-(2-(( <i>E</i> )-styryl)cyclopropyl)-3-(trifluoromethyl)benzene (3o).....                            | 19        |
| <i>Cis</i> -( <i>E</i> )-1-methyl-2-(2-styrylcyclopropyl)benzene (3p).....                                         | 19        |
| <i>Cis</i> -( <i>E</i> )-1-fluoro-2-(2-styrylcyclopropyl)benzene (3q).....                                         | 20        |
| <i>Cis</i> -1-bromo-2-(2-(( <i>E</i> )-styryl)cyclopropyl)benzene (3r).....                                        | 20        |
| <i>Cis</i> -1,3,5-trimethyl-2-(2-(( <i>E</i> )-styryl)cyclopropyl)benzene (3s).....                                | 21        |
| <i>Cis</i> -2-(2-(( <i>E</i> )-styryl)cyclopropyl)naphthalene (3t).....                                            | 21        |
| <i>Cis</i> -(1-methyl-2-(( <i>E</i> )-styryl)cyclopropyl)benzene (3u).....                                         | 22        |
| <i>Cis</i> -( <i>E</i> )-(2-styrylcyclopropane-1,1-diyl)dibenzene (3v).....                                        | 22        |
| <i>Cis</i> -( <i>E</i> )-(2-(2-methyl-3-phenylcyclopropyl)vinyl)benzene (3w).....                                  | 23        |
| <i>Cis</i> -( <i>E</i> )-(2-(2,2-dimethyl-3-phenylcyclopropyl)vinyl)benzene (3x).....                              | 23        |
| 1-(( <i>E</i> )-Styryl)-1,1a,6,6a-tetrahydrocyclopropa[ <i>a</i> ]indene (3y).....                                 | 24        |
| <i>Endo</i> -6a-methyl-1-(( <i>E</i> )-styryl)-1,1a,6,6a-tetrahydrocyclopropa[ <i>a</i> ]indene (3z).....          | 24        |
| <i>Endo</i> -5-bromo-6a-methyl-1-(( <i>E</i> )-styryl)-1,1a,6,6a-tetrahydrocyclopropa[ <i>a</i> ]indene (3aa)..... | 25        |

|                                                                                                                     |           |
|---------------------------------------------------------------------------------------------------------------------|-----------|
| <i>Endo</i> -1-(( <i>E</i> )-styryl)-1a,2,3,7b-tetrahydro-1 <i>H</i> -cyclopropa[ <i>a</i> ]naphthalene (3ab) ..... | 25        |
| <i>Endo</i> -1-(( <i>E</i> )-styryl)-1,1a,2,7b-tetrahydrocyclopropa[ <i>c</i> ]chromene (3ac).....                  | 26        |
| <b>5. Cyclopropanation with different cycloheptatriene derivatives.....</b>                                         | <b>27</b> |
| <i>Cis</i> -( <i>E</i> )-1-(2-(4-methoxystyryl)cyclopropyl)-3-methylbenzene (3ad).....                              | 27        |
| <i>Cis</i> -( <i>E</i> )-1-methyl-3-(2-(4-(trifluoromethyl)styryl)cyclopropyl)benzene (3af) .....                   | 28        |
| <i>Cis</i> -( <i>E</i> )-1-(2-(4-bromostyryl)cyclopropyl)-3-methylbenzene (3ag) .....                               | 28        |
| <i>Cis</i> -( <i>E</i> )-1,3-dimethoxy-5-(2-(2-( <i>m</i> -tolyl)cyclopropyl)vinyl)benzene (3ah).....               | 29        |
| <i>Cis</i> -1-methyl-3-(2-(2-methylprop-1-en-1-yl)cyclopropyl)benzene (3ai).....                                    | 29        |
| <i>Cis</i> -4-((2-( <i>m</i> -tolyl)cyclopropyl)methylene)tetrahydro-2 <i>H</i> -pyran (3aj) .....                  | 30        |
| <i>Cis</i> -4-(( <i>E</i> )-2-(2-phenylcyclopropyl)vinyl)-1,1'-biphenyl (3ak) .....                                 | 30        |
| <i>Endo</i> -1-(( <i>E</i> )-2-([1,1'-biphenyl]-4-yl)vinyl)-1,1a,6,6a-tetrahydrocyclopropa[ <i>a</i> ]indene (3al)  |           |
| .....                                                                                                               | 31        |
| <b>6. Cyclopropanation of <i>N</i>-vinylphthalimide .....</b>                                                       | <b>32</b> |
| <i>Cis</i> -( <i>E</i> )-2-(2-styrylcyclopropyl)isoindoline-1,3-dione (6a).....                                     | 32        |
| <i>Trans</i> -2-(2-(( <i>E</i> )-styryl)cyclopropyl)isoindoline-1,3-dione) ( <i>trans</i> -6a) .....                | 32        |
| <i>Cis</i> -( <i>E</i> )-2-(2-(4-methoxystyryl)cyclopropyl)isoindoline-1,3-dione (6b).....                          | 33        |
| <i>Cis</i> -2-(2-(( <i>E</i> )-4-acetylstyryl)cyclopropyl)isoindoline-1,3-dione (6c).....                           | 33        |
| <i>Cis</i> -( <i>E</i> )-2-(2-(4-(trifluoromethyl)styryl)cyclopropyl)isoindoline-1,3-dione (6d).....                | 34        |
| <i>Cis</i> -2-(2-(( <i>E</i> )-2-([1,1'-biphenyl]-4-yl)vinyl)cyclopropyl)isoindoline-1,3-dione (6e) .....           | 35        |
| <i>Cis</i> -( <i>E</i> )-2-(2-(3,5-dimethoxystyryl)cyclopropyl)isoindoline-1,3-dione (6f) .....                     | 36        |
| <i>Trans</i> -2-(2-(2-methylprop-1-en-1-yl)cyclopropyl)isoindoline-1,3-dione (6g).....                              | 36        |
| <i>Trans</i> -2-(2-((tetrahydro-4 <i>H</i> -pyran-4-ylidene)methyl)cyclopropyl)isoindoline-1,3-dione                |           |
| (6h).....                                                                                                           | 37        |
| <b>7. Preparation of Julia-Kocienski reagents.....</b>                                                              | <b>38</b> |
| 5-((Cyclohepta-2,4,6-trien-1-ylmethyl)sulfonyl)-1-phenyl-1 <i>H</i> -tetrazole (4a).....                            | 38        |
| 1-( <i>Tert</i> -butyl)-5-((cyclohepta-2,4,6-trien-1-ylmethyl)sulfonyl)-1 <i>H</i> -tetrazole (4b) .....            | 39        |
| <b>8. Miscellaneous .....</b>                                                                                       | <b>40</b> |
| Phthalimide deprotection and functionalization of amine. ....                                                       | 40        |
| Benzyl ( <i>E</i> )-(2-styrylcyclopropyl)carbamate (8).....                                                         | 40        |
| Oxidative cleavage to aldehyde and esterification. ....                                                             | 41        |
| <i>Cis</i> -2-(1,3-dioxoisindolin-2-yl)cyclopropane-1-carbaldehyde (9a) .....                                       | 41        |
| Methyl 2-(1,3-dioxoisindolin-2-yl)cyclopropane-1-carboxylate (10) .....                                             | 41        |
| Epimerization of aldehyde.....                                                                                      | 42        |
| <i>Trans</i> -2-(1,3-dioxoisindolin-2-yl)cyclopropane-1-carbaldehyde (9b).....                                      | 42        |
| Preparation of styrenes.....                                                                                        | 43        |
| 1-Ethynyl-2-vinylbenzene.....                                                                                       | 43        |
| Triisopropyl((2-vinylphenyl)ethynyl)silane (11) .....                                                               | 43        |
| <i>Cis</i> -( <i>E</i> )-triisopropyl((2-(2-styrylcyclopropyl)phenyl)ethynyl)silane (12a) .....                     | 44        |
| A gold(I)-catalyzed 1,7-enyne cyclization .....                                                                     | 44        |
| ( <i>E</i> )-1-ethynyl-2-(2-styrylcyclopropyl)benzene (12b) .....                                                   | 44        |
| ( <i>E</i> )-3-styryl-1a,7b-dihydro-1 <i>H</i> -cyclopropa[ <i>a</i> ]naphthalene (13).....                         | 45        |
| Cross metathesis of vinyl cyclopropanes.....                                                                        | 45        |
| Methyl ( <i>E</i> )-3-(2-(4-methoxyphenyl)cyclopropyl)acrylate (14).....                                            | 45        |
| 7-(2,4-Dimethoxyphenyl)cyclohepta-1,3,5-triene (S1).....                                                            | 46        |

|                                                                                                                                                            |            |
|------------------------------------------------------------------------------------------------------------------------------------------------------------|------------|
| <i>Trans</i> -4-((2-(2,4-dimethoxyphenyl)cyclopropyl)phenyl acetate (S2) .....                                                                             | 46         |
| Reaction progress monitored by <sup>1</sup> H NMR: .....                                                                                                   | 47         |
| <b>9. Kinetic experiments for the epimerization of alkenylcyclopropanes .....</b>                                                                          | <b>49</b>  |
| Initial rate studies for the gold(I)-catalyzed retro-Buchner reaction of 1a.....                                                                           | 49         |
| Initial rate studies for the gold(I) mediated epimerization of 6a. ....                                                                                    | 52         |
| Calculating the energy difference between the <i>cis</i> - and <i>trans</i> -isomers of 3g and 6a. ....                                                    | 54         |
| <b>10. X-ray crystallography .....</b>                                                                                                                     | <b>55</b>  |
| Crystal data and structure refinement for <i>cis</i> -3a .....                                                                                             | 56         |
| Crystal data and structure refinement for <i>endo</i> -3al .....                                                                                           | 57         |
| Crystal data and structure refinement for <i>cis</i> -6e .....                                                                                             | 58         |
| Crystal data and structure refinement for <i>trans</i> -6e.....                                                                                            | 59         |
| <b>11. DFT calculations.....</b>                                                                                                                           | <b>60</b>  |
| Computational details .....                                                                                                                                | 60         |
| Calculated free energy profile for the formation of 3b.....                                                                                                | 61         |
| Cartesian coordinates (in Å) and energies (in h) for reactants, intermediates and transition states involved in the formation of 3b.....                   | 62         |
| Calculated free energy profile for the formation and isomerization of 6a.....                                                                              | 76         |
| Cartesian coordinates (in Å) and energies (in h) for reactants, intermediates and transition states involved in the formation and isomerization of 6a..... | 77         |
| Calculated free energy profile for the formation and isomerization of 6g.....                                                                              | 91         |
| Cartesian coordinates (in Å) and energies (in h) for reactants, intermediates and transition states involved in the formation and isomerization of 6g..... | 92         |
| Optimized structures of <i>cis</i> -3g and <i>trans</i> -3g.....                                                                                           | 110        |
| Reduced density gradient surface .....                                                                                                                     | 111        |
| Natural bond orbital analysis .....                                                                                                                        | 114        |
| <b>12. NMR spectra .....</b>                                                                                                                               | <b>116</b> |
| <b>13. References .....</b>                                                                                                                                | <b>209</b> |



## 1. General information

All reactions were carried out under argon in anhydrous solvents obtained by passing them through an activated alumina column on a PureSolv<sup>TM</sup> solvent purification system (Innovative Technologies, Inc., MA), unless noted otherwise. All gold-catalyzed reactions were performed in HPLC-grade solvents, without a protective atmosphere. The diastereoselectivity of the cyclopropanation reactions depends in some cases on the reaction time and temperature. The exact reaction times and temperatures are given for each example and have to be respected when reproducing this work. Tropylium tetrafluoroborate was purchased from Fluorochem. Thin layer chromatography was carried out using TLC aluminum sheets coated with 0.2 mm of silica gel (Merck Gf234). Chromatographic purifications were carried out using flash grade silica gel (SDS Chromatogel 60 ACC, 40-60  $\mu\text{m}$ ). NMR spectra were recorded at 23  $^{\circ}\text{C}$  on Bruker Avance 300, 400 and 500 Ultrashield apparatus. Chemical shifts are reported in parts per million and referenced to residual solvent. Coupling constants (J) are reported in hertz (Hz). Mass spectra were recorded on a Waters LCT Premier Spectrometer (ESI and APCI) or on an Autoflex Bruker Daltonics (MALDI and LDI). Melting points were determined using a Büchi melting point apparatus.

The following gold complexes were synthesized according to literature procedures.<sup>1</sup>

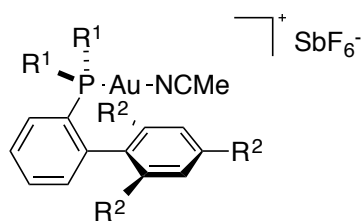

- A:** R<sup>1</sup> = *t*Bu, R<sup>2</sup> = H  
**B:** R<sup>1</sup> = *t*Bu, R<sup>2</sup> = *i*Pr  
**C:** R<sup>1</sup> = cyclohexyl, R<sup>2</sup> = H

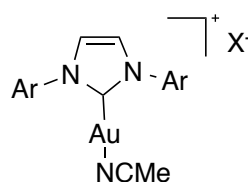

- D:** Ar = mesityl, X = SbF<sub>6</sub>  
**E:** Ar = 2,6-diisopropylbenzene, X = BAr<sup>F</sup><sub>4</sub>

## 2. Preparation of vinyl cycloheptatrienes

### (*E*)-7-Styrylcyclohepta-1,3,5-triene (**1a**)

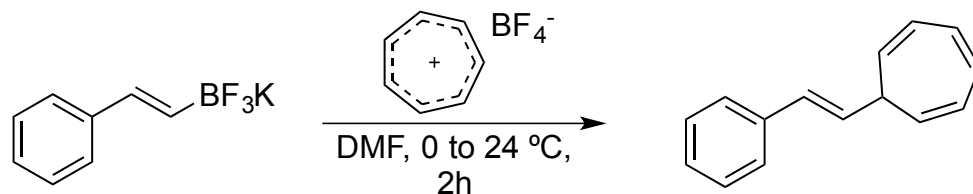

To tropylium tetrafluoroborate (4.2 g, 23.8 mmol, 1.0 equiv) in DMF (100 mL) at 0 °C was added (*E*)-trifluoro(styryl)- $\lambda^4$ -borane, potassium salt (5.0 g, 23.8 mmol, 1.0 equiv) in one portion. The solution was allowed to warm up slowly to 23 °C and quenched after 2 h by adding water and Et<sub>2</sub>O. The phases were separated and the aq. phase was two times extracted with Et<sub>2</sub>O. The combined organic phase was washed three times with a diluted solution of NaCl, followed by one washing with brine. The organic phase was dried over MgSO<sub>4</sub> and concentrated *in vacuo*. The crude residue was purified by filtering over a big silica plug (100 g SiO<sub>2</sub>, eluent: pentane), affording 4.1 g (21.1 mmol, 89%) of a colorless to faint green oil. The characterization data matched our previously reported ones.<sup>2</sup>

### (*E*)-7-(4-Methoxystyryl)cyclohepta-1,3,5-triene (**1b**)

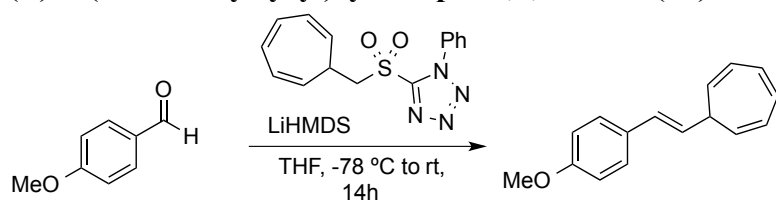

A solution of lithium bis(trimethylsilyl)amide in THF (1.0M, 1.5 mL, 1.5 mmol, 1.0 equiv) was added to a solution of **4a** (472 mg, 1.5 mmol, 1.0 equiv) in dry THF (15 mL, 0.1 M) at -78 °C under an argon atmosphere. After stirring for 5 minutes, *p*-anisaldehyde (365  $\mu$ L, 3.0 mmol, 2.0 equiv) was added neat over the glass and stirring at -78 °C was continued for another hour before the solution was allowed to warm to room temperature over 13 hours. The reaction was quenched by the addition of water and the mixture was extracted with Et<sub>2</sub>O, dried over Na<sub>2</sub>SO<sub>4</sub> and flash chromatography (110 g, SiO<sub>2</sub>, eluent: pentane) yielded **1b** (258 mg, 1.15 mmol, 77%) as a yellow solid.

<sup>1</sup>H NMR (500 MHz, CDCl<sub>3</sub>)  $\delta$  7.38 – 7.34 (m, 2H), 6.91 – 6.87 (m, 2H), 6.74 – 6.71 (m, 2H), 6.51 (d, *J* = 16.0 Hz, 1H), 6.41 (dd, *J* = 15.9, 7.5 Hz, 1H), 5.36 (dd, *J* = 8.9, 5.7 Hz, 2H), 3.84 (s, 3H), 2.46 – 2.41 (m, 1H).

<sup>13</sup>C NMR (126 MHz, CDCl<sub>3</sub>)  $\delta$  159.01, 131.04, 130.19, 129.92, 128.86, 127.30, 124.73, 124.45, 113.98, 55.31, 42.13.

M.p.: 47-48 °C.

HRMS-APCI: calculated for C<sub>16</sub>H<sub>17</sub>O [M+H]<sup>+</sup>: 225.1274; found: 225.1271

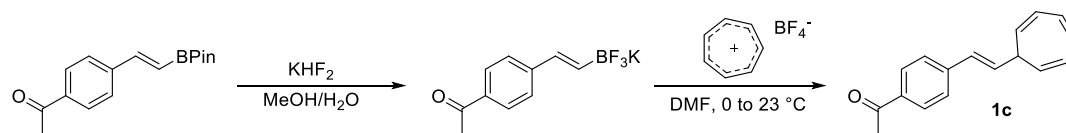

### Potassium (*E*)- 4-(acetyl)styryl trifluoroborate

To (*E*)-1-(4-(2-(4,4,5,5-tetramethyl-1,3,2-dioxaborolan-2-yl)vinyl)phenyl)ethan-1-one (2.720 g, 10.0 mmol, 1.0 equiv, prepared by hydroboration of the corresponding alkyne<sup>3</sup>) in MeOH (54 mL) at 0 °C was added KHF<sub>2</sub> (3.440 g, 44.0 mmol, 4.4 equiv) in water (12 mL). The reaction mixture was stirred for 1 h at 23 °C. Then the reaction mixture was evaporated to dryness and the residue was placed in a Soxhlett cartridge and extracted with refluxing acetone for 3 h. After evaporating acetone, the residue was triturated with Et<sub>2</sub>O and filtered affording 1.825 g (7.2 mmol, 72%) of a white powder.

NMR data are in agreement with literature.<sup>4</sup>

<sup>1</sup>H NMR (500 MHz, DMSO-*d*<sup>6</sup>) δ 7.88 – 7.81 (m, 2H), 7.47 – 7.41 (m, 2H), 6.54 (d, *J* = 18.3 Hz, 1H), 6.40 (dq, *J* = 18.2, 3.5 Hz, 1H), 2.53 (s, *J* = 4.5 Hz, 3H).

<sup>13</sup>C NMR (101 MHz, DMSO-*d*<sup>6</sup>) δ 197.2, 145.0, 134.4, 132.3 (q, *J* = 4.4 Hz), 128.5, 125.4, 26.6.

<sup>19</sup>F NMR (376 MHz, DMSO-*d*<sup>6</sup>) δ 138.3.

**M.p.:** >280 °C (decomp.).

**HRMS-ESI:** calculated for C<sub>10</sub>H<sub>9</sub>BF<sub>3</sub>O [M-K]<sup>-</sup>: 213.0704; found: 213.0697.

### (*E*)-1-(4-(2-(Cyclohepta-2,4,6-trien-1-yl)vinyl)phenyl)ethan-1-one (**1c**)

To potassium (*E*)- 4-(acetyl)styryl trifluoroborate (1.300 g, 5.16 mmol, 1.05 equiv) in DMF (20 mL) at 0 °C was added tropylium tetrafluoroborate (0.875 g, 4.92 mmol, 1.00 equiv) in one portion. The solution was allowed to warm slowly up to 23 °C and quenched after 3 h by adding water and EtOAc. The phases were separated and the aq. phase was two times extracted with EtOAc. The combined organic phase was washed three times with a diluted solution of NaCl, followed by one washing with brine. The organic phase was dried over MgSO<sub>4</sub> and concentrated *in vacuo*. The crude residue was purified by flash chromatography (220 g SiO<sub>2</sub>, eluent: pentane to 50% Et<sub>2</sub>O) affording **1c** (823 mg, 4.92 mmol, 71%) as a yellow solid.

<sup>1</sup>H NMR (500 MHz, CDCl<sub>3</sub>) δ 7.94 – 7.89 (m, 2H), 7.49 – 7.44 (m, 2H), 6.74 – 6.68 (m, 2H), 6.65 (dd, *J* = 15.9, 7.1 Hz, 1H), 6.58 (d, *J* = 16.0 Hz, 1H), 6.28 – 6.23 (m, 2H), 5.34 (dd, *J* = 8.9, 5.8 Hz, 2H), 2.59 (s, 3H), 2.55 – 2.47 (m, 1H).

<sup>13</sup>C NMR (126 MHz, CDCl<sub>3</sub>) δ 197.7, 142.2, 136.0, 134.1, 131.2, 129.8, 128.9, 126.4, 125.0, 123.7, 42.2, 26.7.

**M.p.:** 52-53 °C.

**HRMS-ESI:** calculated for C<sub>17</sub>H<sub>17</sub>O [M+H]<sup>+</sup>: 237.1274; found: 237.1277.

**(E)-7-(4-(Trifluoromethyl)styryl)cyclohepta-1,3,5-triene (1d)**

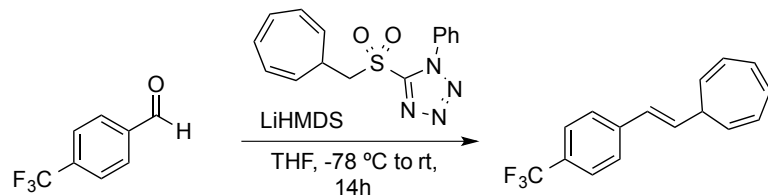

A solution of lithium bis(trimethylsilyl)amide in THF (1.0M, 1.0 mL, 1.0 mmol, 1.0 equiv) was added to a solution of **4a** (314 mg, 1.0 mmol, 1.0 equiv) in dry THF (10 mL, 0.1M) at -78 °C under an argon atmosphere. After stirring for 5 minutes, 4-(trifluoromethyl)benzaldehyde (273  $\mu$ L, 2.0 mmol, 2.0 equiv) was added neat over the glass and stirring at -78 °C was continued for another hour before the solution was allowed to warm to room temperature over 13 hours. The reaction was quenched by the addition of water and the mixture was extracted with Et<sub>2</sub>O, dried over Na<sub>2</sub>SO<sub>4</sub> and flash chromatography (80 g, SiO<sub>2</sub>, eluent: pentane) yielded **1d** (127 mg, 0.48 mmol, 49%) as a colorless oil.

**<sup>1</sup>H NMR** (500 MHz, CDCl<sub>3</sub>)  $\delta$  7.59 (d,  $J$  = 8.2 Hz, 2H), 7.51 (d,  $J$  = 8.2 Hz, 2H), 6.74 – 6.72 (m, 2H), 6.66 – 6.56 (m, 2H), 6.32 – 6.25 (m, 2H), 5.37 (dd,  $J$  = 8.9, 5.8 Hz, 2H), 2.54 (q,  $J$  = 5.9 Hz, 1H).

**<sup>13</sup>C NMR** (126 MHz, CDCl<sub>3</sub>)  $\delta$  133.59, 131.10, 129.29, 126.33, 125.52, 125.49, 124.90, 123.65, 99.99, 42.01.

**<sup>19</sup>F NMR** (376 MHz, CDCl<sub>3</sub>)  $\delta$  -62.56.

**HRMS-APCI**: calculated for C<sub>16</sub>H<sub>14</sub>F<sub>3</sub> [M+H]<sup>+</sup>: 263.1035; found: 263.1042

**(E)-7-(4-Bromostyryl)cyclohepta-1,3,5-triene (1e)**

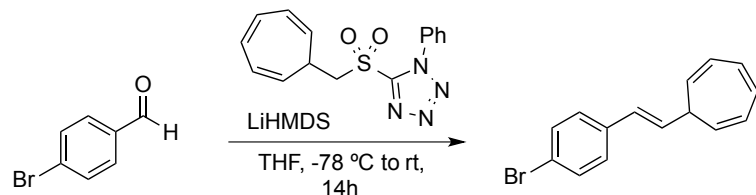

A solution of lithium bis(trimethylsilyl)amide in THF (1.0M, 2.0 mL, 2.0 mmol, 1.0 equiv) was added to a solution of **4a** (629 mg, 2.0 mmol, 1.0 equiv) in dry THF (8 mL, 0.25M) at -78 °C under an argon atmosphere. After stirring for 5 minutes, 4-bromobenzaldehyde (740 mg, 4.0 mmol, 2.0 equiv) was added in one portion and stirring at -78 °C was continued for another hour before the solution was allowed to warm to room temperature over 13 hours. The reaction was quenched by the addition of water and the mixture was extracted with Et<sub>2</sub>O, dried over Na<sub>2</sub>SO<sub>4</sub> and flash chromatography (80 g, SiO<sub>2</sub>, eluent: pentane) yielded **1e** (465 mg, 1.7 mmol, 85%) as a white solid.

**<sup>1</sup>H NMR** (500 MHz, CDCl<sub>3</sub>)  $\delta$  7.48 – 7.44 (m, 2H), 7.30 – 7.26 (m, 2H), 6.74 – 6.72 (m, 2H), 6.57 – 6.46 (m, 2H), 6.29 – 6.24 (m, 2H), 5.35 (dd,  $J$  = 9.0, 5.8 Hz, 2H), 2.48 (q,  $J$  = 5.8 Hz, 1H).

**<sup>13</sup>C NMR** (126 MHz, CDCl<sub>3</sub>)  $\delta$  136.33, 131.73, 131.63, 131.08, 129.40, 127.74, 124.74, 123.98, 120.98, 42.04.

**M.p.:** 55-57 °C.

**HRMS-APCI:** calculated for C<sub>15</sub>H<sub>14</sub>Br [M+H]<sup>+</sup>: 273.0273; found: 273.0281

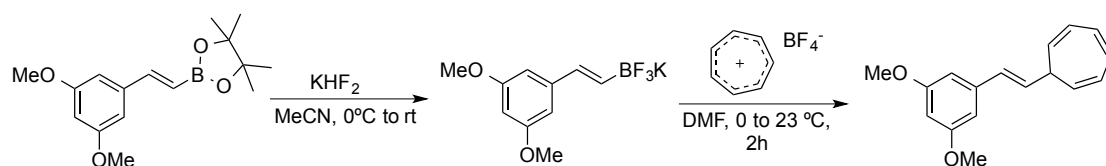

### **Potassium (E)-(3,5-dimethoxystyryl)trifluoro- $\lambda^4$ -borane**

The compound was synthesized according the literature procedure.<sup>5</sup>

To a solution of (*E*)-2-(3,5-dimethoxystyryl)-4,4,5,5-tetramethyl-1,3,2-dioxaborolane (1g, 3.44 mmol, 1.0 equiv) in acetonitrile (5.4 mL, 0.64M) at 0 °C, was added a saturated aqueous solution of KHF<sub>2</sub> (2.3 mL, 10.3 mmol, 3.0 equiv) over 5 minutes. The reaction was left to stir over night at room whilst warming to room temperature. Then the reaction mixture was evaporated to dryness and the residue was placed in a Soxhlett cartridge and extracted with refluxing acetone for 72 h. The long extraction time is necessary for obtaining good yields because of the low solubility of the product. Acetone was evaporated and the residue was triturated in Et<sub>2</sub>O and filtered affording 834 mg (3.09 mmol, 90%) of a white solid.

NMR data are in agreement with the literature.<sup>5</sup>

### **(E)-7-(3,5-Dimethoxystyryl)cyclohepta-1,3,5-triene (1f)**

To Potassium (E)-(3,5-dimethoxystyryl)trifluoro- $\lambda^4$ -borane (834 mg, 3.1 mmol, 1.0 equiv) in DMF (12.5 mL) at 0 °C was added tropylium tetrafluoroborate (550 mg, 3.1 mmol, 1.0 equiv) in one portion. The solution was allowed to warm slowly up to 23 °C and quenched after 2 h by adding water and EtOAc. The phases were separated and the aq. phase was two times extracted with EtOAc. The combined organic phase was washed three times with a diluted solution of NaCl, followed by one washing with brine. The organic phase was dried over NaSO<sub>4</sub> and concentrated *in vacuo*. The crude residue was purified by flash chromatography (220 g SiO<sub>2</sub>, eluent: 1% Et<sub>2</sub>O in pentane) affording **1f** (0.95 g, 4.10 mmol, 86%) as a white solid.

<sup>1</sup>H NMR (500 MHz, CDCl<sub>3</sub>)  $\delta$  6.74 – 6.71 (m, 2H), 6.59 (d, *J* = 2.2 Hz, 2H), 6.57 – 6.47 (m, 2H), 6.40 (t, *J* = 2.2 Hz, 1H), 6.29 – 6.24 (m, 2H), 5.36 (dd, *J* = 8.9, 5.7 Hz, 2H), 3.84 (s, 3H), 2.47 (q, *J* = 5.8 Hz, 1H).

<sup>13</sup>C NMR (126 MHz, CDCl<sub>3</sub>)  $\delta$  160.93, 139.44, 131.53, 131.07, 130.52, 124.63, 124.25, 104.33, 99.60, 55.35, 42.01.

**HRMS-APCI:** calculated for C<sub>17</sub>H<sub>19</sub>O<sub>2</sub> [M+H]<sup>+</sup>: 255.1380; found: 255.1379.

### 7-(2-Methylprop-1-en-1-yl)cyclohepta-1,3,5-triene (**1g**)

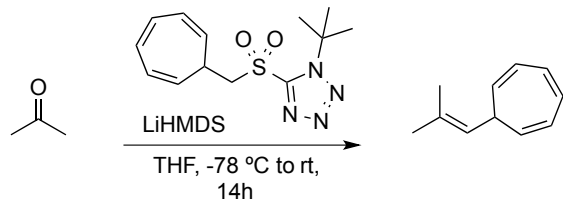

A solution of lithium bis(trimethylsilyl)amide in THF (1.0M, 4.5 mL, 4.5 mmol, 3.0 equiv) was added to a solution of **4b** (883 mg, 3.0 mmol, 2.0 equiv) and acetone (110  $\mu$ L, 1.5 mmol, 1.0 equiv) in dry THF (15 mL, 0.1M) at  $-78\text{ }^{\circ}\text{C}$  under an argon atmosphere, and stirred for 1 h before the solution was allowed to warm to room temperature over 13 hours. The reaction was quenched by the addition of water and the mixture was extracted with  $\text{Et}_2\text{O}$ , dried over  $\text{Na}_2\text{SO}_4$  and flash chromatography (40 g,  $\text{SiO}_2$ , eluent: pentane) yielded **1g** (165 mg, 1.13 mmol, 75%) as a colorless oil.

$^1\text{H NMR}$  (500 MHz,  $\text{CDCl}_3$ )  $\delta$  6.72 – 6.69 (m, 2H), 6.22 – 6.17 (m, 2H), 5.57 (dt,  $J = 8.6, 1.4$  Hz, 1H), 5.17 (dd,  $J = 8.9, 5.4$  Hz, 2H), 2.34 (dt,  $J = 9.4, 5.6$  Hz, 1H), 1.80 (s, 3H), 1.58 (s, 3H).

$^{13}\text{C NMR}$  (126 MHz,  $\text{CDCl}_3$ )  $\delta$  133.67, 130.92, 126.81, 126.31, 124.07, 38.58, 25.67, 18.04.

HRMS-APCI: calculated for  $\text{C}_{11}\text{H}_{15} [\text{M}+\text{H}]^+$ : 147.1168; found: 147.1166

### 4-(Cyclohepta-2,4,6-trien-1-ylmethylene)tetrahydro-2H-pyran (**1h**)

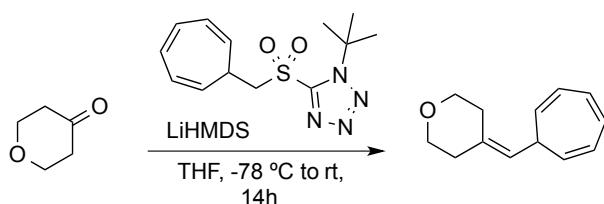

A solution of lithium bis(trimethylsilyl)amide in THF (1.0 M, 4.5 mL, 4.5 mmol, 3.0 equiv) was added to a solution of **4b** (883 mg, 3.0 mmol, 2.0 equiv) and tetrahydro-4H-pyran-4-one (139  $\mu$ L, 1.5 mmol, 1.0 equiv) in dry THF (15 mL, 0.1M) at  $-78\text{ }^{\circ}\text{C}$  under an argon atmosphere, and stirred for 1 h before the solution was allowed to warm to room temperature over 13 hours. The reaction was quenched by the addition of water and the mixture was extracted with  $\text{Et}_2\text{O}$ , dried over  $\text{Na}_2\text{SO}_4$  and flash chromatography (80 g,  $\text{SiO}_2$ , eluent: pentane) yielded **1h** (242 mg, 1.28 mmol, 86%) as a colorless oil.

$^1\text{H NMR}$  (500 MHz,  $\text{CDCl}_3$ )  $\delta$  6.73 – 6.69 (m, 2H), 6.25 – 6.18 (m, 2H), 5.65 (d,  $J = 8.5$  Hz, 1H), 3.77 – 3.72 (m, 2H), 3.68 – 3.64 (m, 2H), 2.37 (dt,  $J = 8.8, 5.4$  Hz, 1H), 2.33 – 2.29 (m, 2H), 2.22 – 2.18 (m, 2H).

$^{13}\text{C NMR}$  (126 MHz,  $\text{CDCl}_3$ )  $\delta$  136.48, 131.02, 125.96, 125.56, 124.24, 69.60, 68.74, 37.52, 36.72, 30.13.

HRMS-APCI: calculated for  $\text{C}_{13}\text{H}_{17}\text{O} [\text{M}+\text{H}]^+$ : 189.1274; found: 189.1274

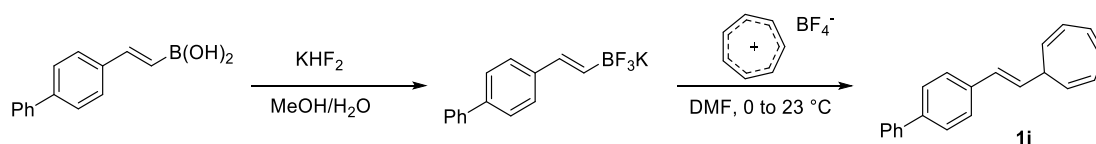

### Potassium (*E*)-(2-([1,1'-biphenyl]-4-yl)vinyl)trifluoroborate

The product was synthesized using a modified literature procedure<sup>4</sup>:

To *trans*-2-(4-Biphenyl)vinylboronic acid (1.066 g, 4.76 mmol, 1.0 equiv) in MeOH(95 mL) was added a solution of KHF<sub>2</sub> (1.635 g, 20.93 mmol, 4.4 equiv) in water (21 mL) and stirred for 3 h at 23 °C. Then the reaction mixture was evaporated to dryness and the residue was placed in a Soxhlett cartridge and extracted with refluxing acetone for 72 h. The long extraction time is necessary for obtaining good yields because of the low solubility of the product. Acetone was evaporated and the residue was triturated in Et<sub>2</sub>O and filtered affording 1.129 g (4.76 mmol, 83%) of a white solid.

The characterization data corresponds to literature data<sup>4</sup>

<sup>1</sup>H NMR (500 MHz, DMSO-*d*<sup>6</sup>) δ 7.68 – 7.62 (m, 2H), 7.59 – 7.54 (m, 2H), 7.47 – 7.43 (m, 2H), 7.41 (d, *J* = 8.3 Hz, 2H), 7.35 – 7.30 (m, 1H), 6.53 (d, *J* = 18.2 Hz, 1H), 6.26 (dq, *J* = 18.2, 3.5 Hz, 1H).

### (*E*)-4-(2-(Cyclohepta-2,4,6-trien-1-yl)vinyl)-1,1'-biphenyl (**1i**)

To potassium (*E*)-(2-([1,1'-biphenyl]-4-yl)vinyl)trifluoroborate (1.23 g, 4.3 mmol, 1.05 equiv) in DMF (16.5 mL) at 0 °C was added tropylium tetrafluoroborate (0.73 g, 4.1 mmol, 1.00 equiv) in one portion. The solution was allowed to warm slowly up to 23 °C and quenched after 2 h by adding water and EtOAc. The phases were separated and the aq. phase was two times extracted with EtOAc. The combined organic phase was washed three times with a diluted solution of NaCl, followed by one washing with brine. The organic phase was dried over MgSO<sub>4</sub> and concentrated *in vacuo*. The crude residue was purified by flash chromatography (220 g SiO<sub>2</sub>, eluent: pentane) affording **1i** (0.95 g, 4.10 mmol, 86%) as a white solid.

<sup>1</sup>H NMR (500 MHz, CDCl<sub>3</sub>) δ 7.63 – 7.59 (m, 2H), 7.58 – 7.55 (m, 2H), 7.49 – 7.42 (m, 4H), 7.37 – 7.32 (m, 1H), 6.76 – 6.66 (m, 2H), 6.62 – 6.53 (m, 2H), 6.29 – 6.21 (m, 2H), 5.36 (dd, *J* = 9.0, 5.7 Hz, 2H), 2.52 – 2.43 (m, 1H).

<sup>13</sup>C NMR (101 MHz, CDCl<sub>3</sub>) δ 140.2, 136.6, 131.3, 131.2, 130.2, 128.9, 127.4 (two signals), 127.1, 126.8, 124.8, 124.5, 42.3.

**M.p.:** 101-103 °C.

**HRMS-ESI:** calculated for C<sub>21</sub>H<sub>19</sub> [M+H]<sup>+</sup>: 271.1481; found: 271.1491.

### 3. General procedure for the gold(I)-catalyzed cyclopropanation

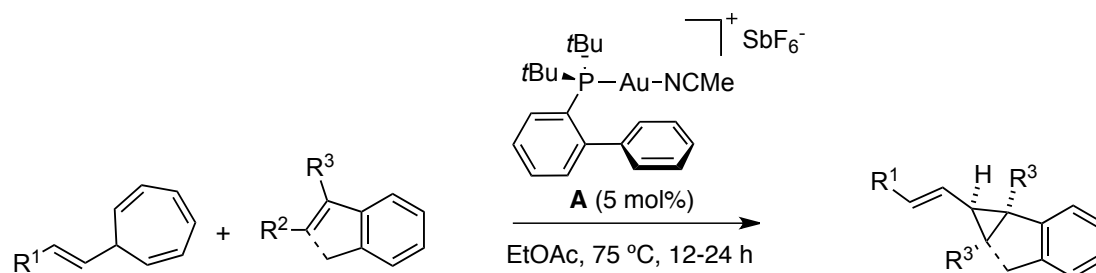

A solution of vinylcycloheptatriene (1.0 equiv), olefin (1.5-2.0 equiv) and gold catalyst **A** (5 mol%) in EtOAc (10 mL/mmol) was heated in a closed screw-cap tube/vial at 75 °C for 12-24 h. The reaction mixture was cooled to room temperature, the solvent removed *in vacuo* and the crude residue was purified by column chromatography.

### 4. Cyclopropanation of different olefin substrates

#### *Cis-(E)*-1-methyl-3-(2-styrylcyclopropyl)benzene (**3a**)

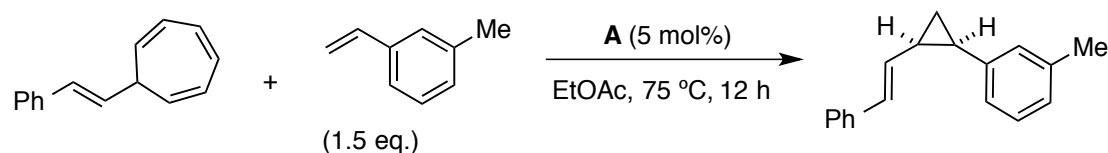

This compound (colorless crystals, 43.7 mg, 75%, d.r. >20:1) was prepared according to the general procedure from (E)-7-styrylcyclohepta-1,3,5-triene (49.0 mg, 25  $\mu$ mol), 1-methyl-3-vinylbenzene (50.0  $\mu$ L, 375  $\mu$ mol) and gold catalyst **A** (9.7 mg, 12.5  $\mu$ mol). The crude residue was purified by flash chromatography (40 g SiO<sub>2</sub>, eluent: pentane).

Suitable crystals for X-ray diffraction were obtained by slow evaporation of a solution in Chloroform.

The stereochemistry was confirmed by 1D NOESY experiments<sup>6</sup> (see spectral data for full details).

<sup>1</sup>H NMR (500 MHz, CDCl<sub>3</sub>)  $\delta$  7.25 – 7.12 (m, 7H), 7.08 – 7.03 (m, 2H), 6.54 (d,  $J$  = 15.7 Hz, 1H), 5.57 (dd,  $J$  = 15.7, 9.5 Hz, 1H), 2.49 – 2.42 (m, 1H), 2.36 (s, 3H), 2.04 (qd,  $J$  = 8.9, 5.5 Hz, 1H), 1.38 (td,  $J$  = 8.4, 5.2 Hz, 1H), 1.15 (dt,  $J$  = 6.3, 5.4 Hz, 1H).

<sup>13</sup>C NMR (126 MHz, CDCl<sub>3</sub>)  $\delta$  138.59, 137.80, 137.61, 130.75, 130.11, 129.42, 128.36, 127.96, 126.83, 126.52, 126.01, 125.66, 23.84, 22.73, 21.46, 12.56.

M.p.: 28-30 °C.

HRMS-APCI: calculated for C<sub>18</sub>H<sub>19</sub> [M+H]<sup>+</sup>: 235.1481; found: 235.1475.



### ***Cis*-(*E*)-2-(2-phenylcyclopropyl)vinylbenzene (3b)**

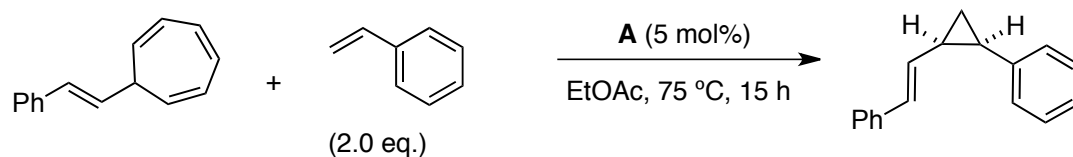

This compound (colorless oil, 37 mg, 65%, d.r. >20:1) was prepared according to the general procedure from (*E*)-7-styrylcyclohepta-1,3,5-triene (50.0 mg, 257  $\mu$ mol), styrene (53.6 mg, 515  $\mu$ mol) and gold catalyst **A** (9.9 mg, 13  $\mu$ mol). The crude residue was purified by flash chromatography (40 g SiO<sub>2</sub>, eluent: pentane).

<sup>1</sup>H NMR (400 MHz, CDCl<sub>3</sub>)  $\delta$  7.36 – 7.11 (m, 10H), 6.53 (d, *J* = 15.7 Hz, 1H), 5.55 (dd, *J* = 15.7, 9.5 Hz, 1H), 2.48 (m, 1H), 2.05 (m, 1H), 1.39 (m, 1H), 1.16 (m, 1H).

<sup>13</sup>C NMR (101 MHz, CDCl<sub>3</sub>)  $\delta$  138.9 , 137.9 , 130.7 , 129.7 , 129.3 , 128.5 , 128.2 , 126.7 , 126.2 , 125.8 , 24.0 , 22.8 , 12.7 .

HRMS-APCI: calculated for C<sub>17</sub>H<sub>17</sub> [M+H]<sup>+</sup>: 221.1325; found: 221.1322.

### ***Cis*-1-methyl-4-(2-(*E*)-styryl)cyclopropylbenzene (3c)**

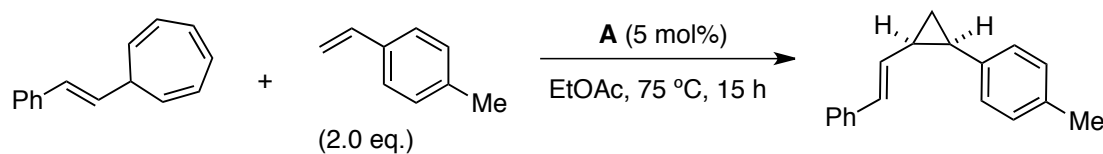

This compound (colorless oil, 41.5 mg, 69%, d.r. >20:1) was prepared according to the general procedure from (*E*)-7-styrylcyclohepta-1,3,5-triene (50.0 mg, 257  $\mu$ mol), 1-methyl-4-vinylbenzene (60.8 mg, 515  $\mu$ mol) and gold catalyst **A** (9.9 mg, 13  $\mu$ mol). The crude residue was purified by flash chromatography (40 g SiO<sub>2</sub>, eluent: pentane).

<sup>1</sup>H NMR (400 MHz, CDCl<sub>3</sub>)  $\delta$  7.56 – 6.96 (m, 9H), 6.59 (d, *J* = 15.7 Hz, 1H), 5.63 (dd, *J* = 15.7, 9.5 Hz, 1H), 2.48 (m, 1H), 2.40 (s, 3H), 2.06 (m, 1H), 1.42 (m, 1H), 1.17 (m, 1H).

<sup>13</sup>C NMR (101 MHz, CDCl<sub>3</sub>)  $\delta$  137.9 , 135.7 , 135.6 , 130.9 , 129.5 , 129.2 , 128.9 , 128.5 , 126.6 , 125.8 , 23.7 , 22.8 , 21.2 , 12.8 .

HRMS-APCI: calculated for C<sub>18</sub>H<sub>19</sub> [M+H]<sup>+</sup>: 235.1481; found: 235.1477.

### ***Cis*-1-chloro-4-(2-(*E*)-styryl)cyclopropylbenzene (3d)**

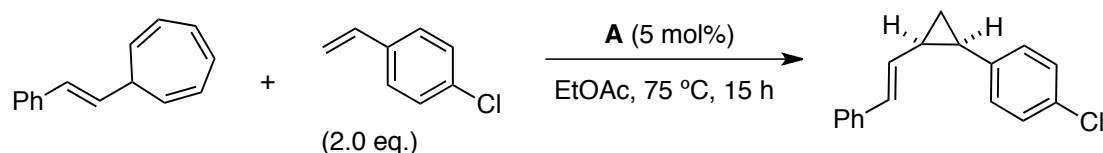

This compound (colorless oil, 49 mg, 75%, d.r. >20:1) was prepared according to the general procedure from (*E*)-7-styrylcyclohepta-1,3,5-triene (50.0 mg, 257  $\mu$ mol), 1-chloro-4-vinylbenzene (71.3 mg, 515  $\mu$ mol) and gold catalyst **A** (9.9 mg, 13  $\mu$ mol). The crude residue was purified by flash chromatography (40 g SiO<sub>2</sub>, eluent: pentane).

**<sup>1</sup>H NMR** (400 MHz, CDCl<sub>3</sub>) δ 7.15 - 7.32 (m, 9 H), 6.56 (d, J=15.8 Hz, 1 H), 5.52 (dd, J=15.8, 9.4 Hz, 1 H), 2.38 - 2.49 (m, 1 H), 2.01 - 2.13 (m, 1 H), 1.37 - 1.46 (m, 1 H), 1.08 - 1.19 (m, 1 H).

**<sup>13</sup>C NMR** (101 MHz, CDCl<sub>3</sub>) δ 137.6 , 137.4 , 131.9 , 130.7 , 130.1 , 130.0 , 128.6 , 128.3 , 126.9 , 125.8 , 23.3 , 22.8 , 12.8 .

**HRMS-APCI**: calculated for C<sub>17</sub>H<sub>16</sub>Cl [M+H]<sup>+</sup>: 255.0935; found: 255.0923.

**Cis-1-(2-((E)-styryl)cyclopropyl)-4-(trifluoromethyl)benzene (3e)**

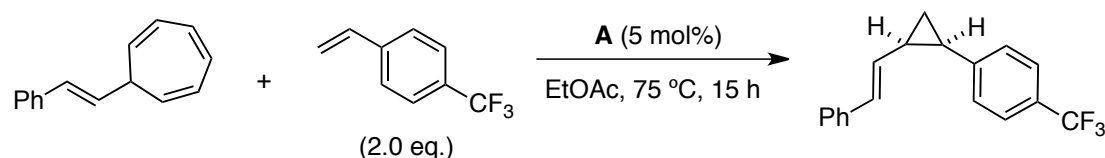

This compound (colorless oil, 44 mg, 59%, d.r. 19:1) was prepared according to the general procedure from (*E*)-7-styrylcyclohepta-1,3,5-triene (50.0 mg, 257 μmol), 1-(trifluoromethyl)-4-vinylbenzene (89.0 mg, 515 μmol) and gold catalyst **A** (9.9 mg, 13 μmol). The crude residue was purified by flash chromatography (40 g SiO<sub>2</sub>, eluent: pentane).

**<sup>1</sup>H NMR** (400 MHz, CDCl<sub>3</sub>) δ 7.58 (d, J=8.2 Hz, 2H), 7.39 (d, J=8.2 Hz, 2H), 7.27 (m, 2H), 7.18 (m, 3H), 6.58 (d, J=15.8 Hz, 1H), 5.53 (dd, J=15.6, 9.2 Hz, 1H), 2.50 (m, 1H), 2.14 (m, 1H), 1.47 (m, 1H), 1.22 (m, 1H).

**<sup>13</sup>C NMR** (75 MHz, CDCl<sub>3</sub>) δ 143.2 , 137.5 , 130.6 , 129.5 , 129.4 , 128.6 , 128.4 (q, J=32.3 Hz), 127.0 , 125.8 , 125.2 (q, J = 3.7 Hz), 124.5 (q, J= 272.6 Hz), 23.8 , 23.3 , 13.0 .

**<sup>19</sup>F NMR** (376 MHz, CDCl<sub>3</sub>) δ -62.2 .

**HRMS-APCI**: calculated for C<sub>18</sub>H<sub>16</sub>F<sub>3</sub> [M+H]<sup>+</sup>: 289.1199; found: 289.1192.

**Cis-(E)-1-fluoro-4-(2-styrylcyclopropyl)benzene (3f)**

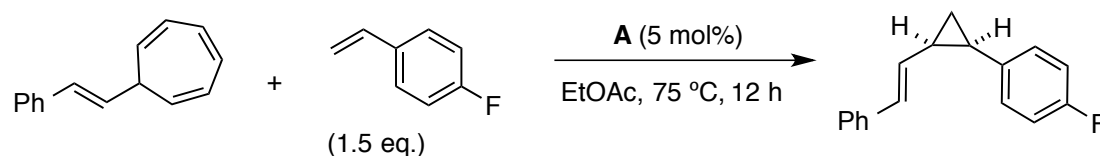

This compound (colorless oil, 38.8 mg, 65%, d.r. >20:1) was prepared according to the general procedure from (*E*)-7-styrylcyclohepta-1,3,5-triene (49.0 mg, 25 μmol), 1-fluoro-4-vinylbenzene (45.0 μL, 375 μmol) and gold catalyst **A** (9.7 mg, 12.5 μmol). The crude residue was purified by flash chromatography (40 g SiO<sub>2</sub>, eluent: pentane).

**<sup>1</sup>H NMR** (500 MHz, CDCl<sub>3</sub>) δ 7.26 – 7.23 (m, 4H), 7.17 – 7.15 (m, 3H), 7.03 – 6.98 (m, 2H), 6.54 (d, J = 15.8 Hz, 1H), 5.49 (dd, J = 15.7, 9.4 Hz, 1H), 2.43 (q, J = 8.3 Hz, 1H), 2.03 (qd, J = 8.8, 5.5 Hz, 1H), 1.40 (td, J = 8.4, 5.2 Hz, 1H), 1.12 – 1.07 (m, 1H).

**<sup>13</sup>C NMR** (126 MHz, CDCl<sub>3</sub>) δ 161.40 (d, J = 244.0 Hz), 137.62 , 134.38 (d, J = 3.2 Hz), 130.70 (d, J = 7.9 Hz), 130.32 , 129.71 , 128.42 , 126.68 , 125.63 , 114.91 (d, J = 21.2 Hz), 23.03 , 22.37 , 12.73.

$^{19}\text{F}$  NMR (376 MHz,  $\text{CDCl}_3$ )  $\delta$  -117.17 (ddd,  $J = 13.9, 8.9, 5.4$  Hz).

HRMS-APCI: calculated for  $\text{C}_{17}\text{H}_{14}\text{F}$   $[\text{M}-\text{H}]^+$ : 237.1074; found: 237.1068.

### *Cis*-1-methoxy-4-(2-((*E*)-styryl)cyclopropyl)benzene (3g)

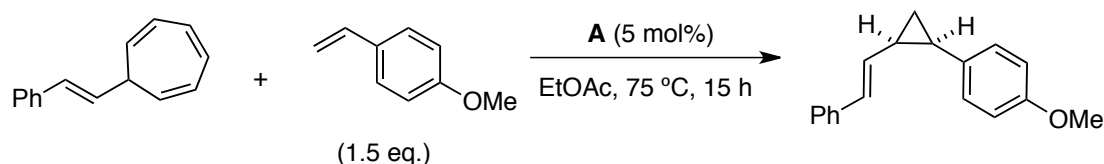

This compound (yellow oil that solidifies in the freezer, 45 mg, 70%, d.r. 15:1) was prepared according to the general procedure from (*E*)-7-styrylcyclohepta-1,3,5-triene (50.0 mg, 257  $\mu\text{mol}$ ), 1-methoxy-4-vinylbenzene (51.8 mg, 386  $\mu\text{mol}$ ) and gold catalyst **A** (9.9 mg, 13  $\mu\text{mol}$ ). The crude residue was purified by flash chromatography (40 g  $\text{SiO}_2$ , eluent: gradient from pentane to 1%  $\text{Et}_2\text{O}$  in pentane).

The stereochemistry was confirmed by 1D NOESY experiments<sup>6</sup> (see spectral data for full details).

$^1\text{H}$  NMR (400 MHz,  $\text{CDCl}_3$ )  $\delta$  7.22 (m, 7 H), 6.89 (m, 2 H), 6.56 (d,  $J=15.8$  Hz, 1 H), 5.56 (dd,  $J=15.8, 9.4$  Hz, 1 H), 3.84 (s, 3 H), 2.44 (m, 1 H), 2.02 (m, 1 H), 1.39 (m, 1 H), 1.11 (m, 1 H).

$^{13}\text{C}$  NMR (101 MHz,  $\text{CDCl}_3$ )  $\delta$  158.1, 137.9, 131.1, 130.9, 130.4, 129.4, 128.5, 126.6, 125.7, 113.9, 55.3, 23.2, 22.5, 12.8.

HRMS-APCI: calculated for  $\text{C}_{18}\text{H}_{19}\text{O}$   $[\text{M}+\text{H}]^+$ : 251.1430; found: 251.1425.

### *Cis*-(*E*)-4-(2-styrylcyclopropyl)phenyl acetate (3h)

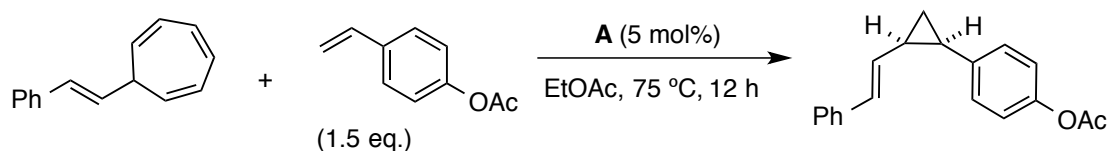

This compound (colorless solid, 47.1 mg, 68%, d.r. 19:1) was prepared according to the general procedure from (*E*)-7-styrylcyclohepta-1,3,5-triene (49.0 mg, 25  $\mu\text{mol}$ ), 4-vinylphenyl acetate (57.0  $\mu\text{L}$ , 375  $\mu\text{mol}$ ) and gold catalyst **A** (9.7 mg, 12.5  $\mu\text{mol}$ ). The crude residue was purified by flash chromatography (40 g  $\text{SiO}_2$ , eluent: 99:1 pentane/ $\text{Et}_2\text{O}$ ).

$^1\text{H}$  NMR (500 MHz,  $\text{CDCl}_3$ )  $\delta$  7.30 – 7.27 (m, 2H), 7.25 – 7.22 (m, 2H), 7.17 – 7.12 (m, 3H), 7.05 – 7.02 (m, 2H), 6.54 (d,  $J = 15.8$  Hz, 1H), 5.53 (dd,  $J = 15.7, 9.5$  Hz, 1H), 2.47 – 2.41 (m, 1H), 2.31 (s, 3H), 2.08 – 2.00 (m, 1H), 1.40 (td,  $J = 8.4, 5.2$  Hz, 1H), 1.13 – 1.08 (m, 1H).

$^{13}\text{C}$  NMR (126 MHz,  $\text{CDCl}_3$ )  $\delta$  169.51, 148.96, 137.61, 136.38, 130.34, 130.23, 129.75, 128.40, 126.64, 125.67, 121.12, 23.25, 22.54, 21.16, 12.86.

**M.p.:** 61-63  $^\circ\text{C}$ .

HRMS-APCI: calculated for  $\text{C}_{19}\text{H}_{18}\text{NaO}_2$   $[\text{M}+\text{Na}]^+$ : 301.1199; found: 301.1187.

### **Cis-methyl 4-(2-((*E*)-styryl)cyclopropyl)benzoate (3i)**

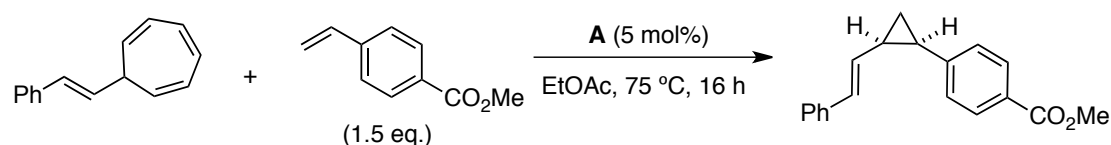

This compound (white solid, 38.5 mg, 54%, d.r. >20:1) was prepared according to the general procedure from (*E*)-7-styrylcyclohepta-1,3,5-triene (50.0 mg, 257  $\mu$ mol), methyl 4-vinylbenzoate (62.6 mg, 386  $\mu$ mol) and gold catalyst **A** (9.9 mg, 13  $\mu$ mol). The crude residue was purified by flash chromatography (40 g SiO<sub>2</sub>, eluent: gradient from pentane to 6% Et<sub>2</sub>O in pentane).

The stereochemistry was confirmed by 1D NOESY experiments<sup>6</sup> (see spectral data for full details).

**<sup>1</sup>H NMR** (400 MHz, CDCl<sub>3</sub>)  $\delta$  7.97 (d, *J*=8.2 Hz, 2 H), 7.31 (d, *J*=8.2 Hz, 2 H), 7.21 (m, 2 H), 7.13 (m, 3 H), 6.53 (d, *J*=15.8 Hz, 1 H), 5.51 (dd, *J*=15.6, 9.2 Hz, 1 H), 3.91 (s, 3 H), 2.48 (m, 1 H), 2.10 (m, 1 H), 1.43 (m, 1 H), 1.23 (m, 1 H).

**<sup>13</sup>C NMR** (75 MHz, CDCl<sub>3</sub>)  $\delta$  167.2, 144.6, 137.5, 130.5, 129.5, 129.5, 129.1, 128.5, 128.0, 126.9, 125.8, 52.1, 24.1, 23.5, 13.0.

**M.p.:** 60-61 °C.

**HRMS-ESI:** calculated for C<sub>19</sub>H<sub>18</sub>NaO<sub>2</sub> [M+Na]<sup>+</sup>: 301.1199; found: 301.1210.

### **Cis-(*E*)-1-(*tert*-butyl)-4-(2-styrylcyclopropyl)benzene (3j)**

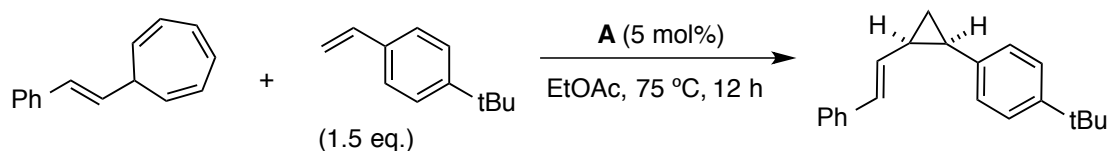

This compound (colorless oil, 48.4 mg, 70%, d.r. >20:1) was prepared according to the general procedure from (*E*)-7-styrylcyclohepta-1,3,5-triene (49.0 mg, 25  $\mu$ mol), 1-(*tert*-butyl)-4-vinylbenzene (69.0  $\mu$ L, 375  $\mu$ mol) and gold catalyst **A** (9.7 mg, 12.5  $\mu$ mol). The crude residue was purified by flash chromatography (40 g SiO<sub>2</sub>, eluent: pentane).

**<sup>1</sup>H NMR** (500 MHz, CDCl<sub>3</sub>)  $\delta$  7.35 – 7.31 (m, 2H), 7.26 – 7.13 (m, 7H), 6.54 (d, *J* = 15.7 Hz, 1H), 5.60 (dd, *J* = 15.7, 9.5 Hz, 1H), 2.47 – 2.39 (m, 1H), 2.08 – 1.98 (m, 1H), 1.38 (td, *J* = 8.5, 5.2 Hz, 1H), 1.34 (s, 9H), 1.13 (dt, *J* = 6.4, 5.3 Hz, 1H).

**<sup>13</sup>C NMR** (126 MHz, CDCl<sub>3</sub>)  $\delta$  148.83, 137.86, 135.62, 130.95, 129.33, 128.78, 128.35, 126.49, 125.69, 125.01, 34.40, 31.40, 23.47, 22.74, 12.76.

**HRMS-APCI:** calculated for C<sub>21</sub>H<sub>23</sub> [M-H]<sup>+</sup>: 275.1794; found: 275.1792.

### *Cis*-4-(2-((*E*)-styryl)cyclopropyl)-1,1'-biphenyl (3k)

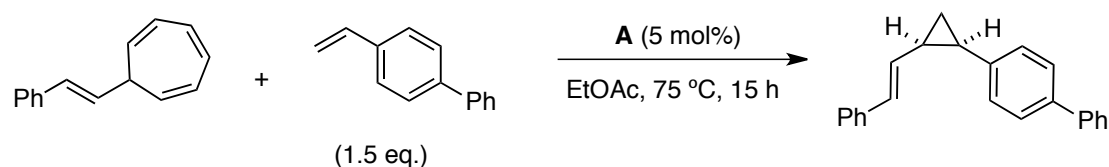

This compound (yellow viscous oil, 63 mg, 83%, d.r. >20:1) was prepared according to the general procedure from (*E*)-7-styrylcyclohepta-1,3,5-triene (50.0 mg, 257  $\mu$ mol), 4-vinyl-1,1'-biphenyl (69.6 mg, 386  $\mu$ mol) and gold catalyst **A** (9.9 mg, 13  $\mu$ mol). The crude residue was purified by flash chromatography (40 g SiO<sub>2</sub>, eluent: pentane).

<sup>1</sup>H NMR (400 MHz, CDCl<sub>3</sub>)  $\delta$  7.57 (d, *J*=7.6 Hz, 2 H), 7.49 (d, *J*=7.9 Hz, 2 H), 7.39 (m, 2 H), 7.29 (m, 3 H), 7.12 (m, 5 H), 6.51 (d, *J*=15.8 Hz, 1 H), 5.57 (dd, *J*=15.6, 9.5 Hz, 1 H), 2.43 (m, 1 H), 2.01 (m, 1 H), 1.36 (m, 1 H), 1.13 (m, 1 H).

<sup>13</sup>C NMR (101 MHz, CDCl<sub>3</sub>)  $\delta$  141.1 , 139.0 , 138.1 , 137.8 , 130.6 , 129.9 , 129.7 , 128.9 , 128.5 , 127.2 , 127.1 , 126.9 , 126.7 , 125.8 , 23.7 , 23.1 , 12.9 .

HRMS-APCI: calculated for C<sub>23</sub>H<sub>21</sub> [M+H]<sup>+</sup>: 297.1641; found: 297.1638.

M.p.: 74-75 °C.

### *Cis*-(*E*)-3-(2-styrylcyclopropyl)benzaldehyde (3l)

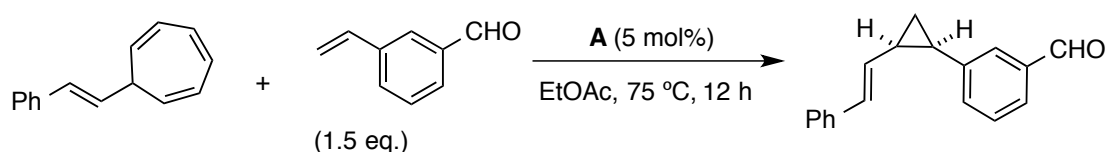

This compound (colorless oil, 44.7 mg, 72%, d.r. >20:1) was prepared according to the general procedure from (*E*)-7-styrylcyclohepta-1,3,5-triene (49.0 mg, 25  $\mu$ mol), 3-vinylbenzaldehyde (48.0  $\mu$ L, 375  $\mu$ mol) and gold catalyst **A** (9.7 mg, 12.5  $\mu$ mol). The crude residue was purified by flash chromatography (40 g SiO<sub>2</sub>, eluent: 99:1 to 80:20 pentane/Et<sub>2</sub>O).

<sup>1</sup>H NMR (500 MHz, CDCl<sub>3</sub>)  $\delta$  10.03 (s, 1H), 7.83 – 7.78 (m, 1H), 7.74 (dt, *J* = 7.5, 1.5 Hz, 1H), 7.55 (ddt, *J* = 7.7, 2.0, 0.8 Hz, 1H), 7.47 (t, *J* = 7.6 Hz, 1H), 7.26 – 7.18 (m, 2H), 7.18 – 7.10 (m, 3H), 6.55 (d, *J* = 15.8 Hz, 1H), 5.48 (dd, *J* = 15.7, 9.3 Hz, 1H), 2.53 (td, *J* = 8.6, 6.6 Hz, 1H), 2.17 – 2.07 (m, 1H), 1.49 – 1.44 (m, 1H), 1.25 (dt, *J* = 6.5, 5.5 Hz, 1H).

<sup>13</sup>C NMR (126 MHz, CDCl<sub>3</sub>)  $\delta$  192.50, 140.10, 137.41, 136.37, 135.42, 130.41, 130.02, 129.42, 128.78, 128.42, 127.83, 126.80, 125.66, 23.52, 22.85, 12.56.

HRMS-APCI: calculated for C<sub>18</sub>H<sub>16</sub>NaO [M+Na]<sup>+</sup>: 271.1093; found: 271.1089.

### *Cis*-1-bromo-3-(2-((*E*)-styryl)cyclopropyl)benzene (**3m**)

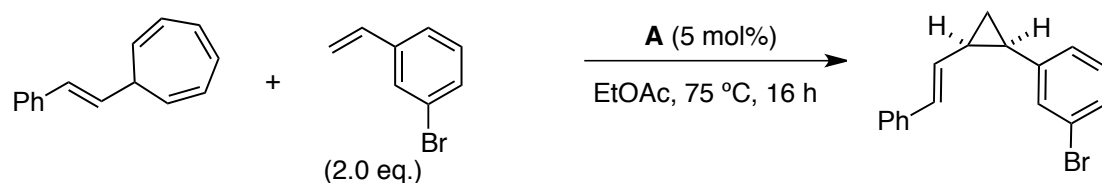

This compound (colorless oil, 43 mg, 56%, d.r. >20:1) was prepared according to the general procedure from (*E*)-7-styrylcyclohepta-1,3,5-triene (50.0 mg, 257  $\mu\text{mol}$ ), 1-bromo-3-vinylbenzene (94 mg, 515  $\mu\text{mol}$ ) and gold catalyst **A** (9.9 mg, 13  $\mu\text{mol}$ ). The crude residue was purified by flash chromatography (40 g  $\text{SiO}_2$ , eluent: pentane).

$^1\text{H NMR}$  (500 MHz,  $\text{CDCl}_3$ )  $\delta$  7.43 (br. s, 1H), 7.33 (m, 1H), 7.22 (m, 2H), 7.19 – 7.10 (m, 5H), 6.52 (d,  $J = 15.7$  Hz, 1H), 5.49 (dd,  $J = 15.7, 9.4$  Hz, 1H), 2.41 (m, 1H), 2.04 (m, 1H), 1.38 (m, 1H), 1.12 (m, 1H).

$^{13}\text{C NMR}$  (126 MHz,  $\text{CDCl}_3$ )  $\delta$  141.4, 137.7, 132.4, 130.3, 129.8, 129.7, 129.3, 128.6, 127.9, 126.9, 125.8, 122.4, 23.7, 23.0, 12.7.

**HRMS**-APCI: calculated for  $\text{C}_{17}\text{H}_{16}\text{Br}$   $[\text{M}+\text{H}]^+$ : 299.0418; found: 299.0430.

### *Cis*-1-nitro-3-(2-((*E*)-styryl)cyclopropyl)benzene (**3n**)

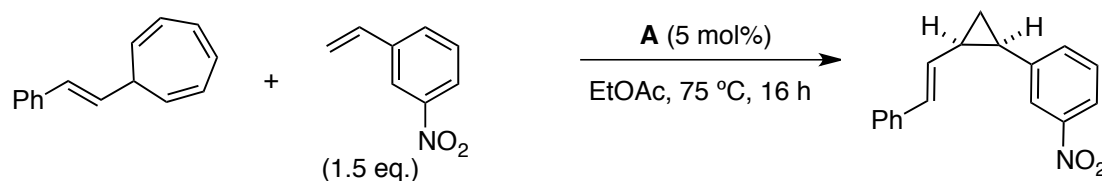

This compound (yellow oil, 31.1 mg, 47%, d.r. >20:1) was prepared according to the general procedure from (*E*)-7-styrylcyclohepta-1,3,5-triene (49. mg, 250  $\mu\text{mol}$ ), 1-nitro-3-vinylbenzene (52  $\mu\text{L}$ , 375  $\mu\text{mol}$ ) and gold catalyst **A** (9.7 mg, 12.5  $\mu\text{mol}$ ). The crude residue was purified by flash chromatography (24 g  $\text{SiO}_2$ , eluent: gradient from pentane to 1%  $\text{Et}_2\text{O}$  in pentane).

The stereochemistry was confirmed by 1D NOESY experiments<sup>6</sup> (see spectral data for full details).

$^1\text{H NMR}$  (400 MHz,  $\text{CDCl}_3$ )  $\delta$  8.12 (m, 1H), 8.06 (m, 1H), 7.57 (m, 1H), 7.44 (m, 1H), 7.24 – 7.18 (m, 2H), 7.17 – 7.10 (m, 3H), 6.54 (d,  $J = 15.8$  Hz, 1H), 5.45 (dd,  $J = 15.7, 9.1$  Hz, 1H), 2.51 (m, 1H), 2.29 – 1.97 (m, 1H), 1.48 (m, 1H), 1.24 (m, 1H).

$^{13}\text{C NMR}$  (101 MHz,  $\text{CDCl}_3$ )  $\delta$  148.3, 141.3, 137.3, 135.5, 131.2, 129.1, 128.7, 128.6, 127.1, 125.8, 123.9, 121.4, 23.6, 23.2, 12.9.

### *Cis*-1-(2-((*E*)-styryl)cyclopropyl)-3-(trifluoromethyl)benzene (**3o**)

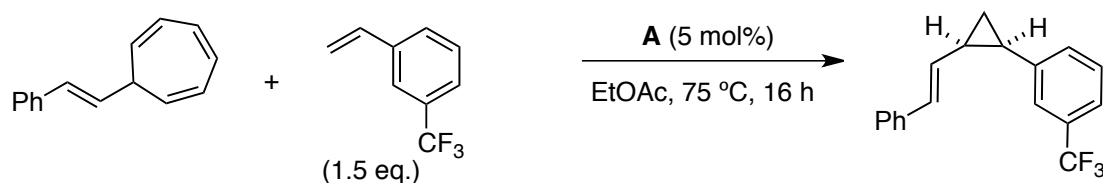

This compound (colorless oil, 37.8 mg, 52%, d.r. >20:1) was prepared according to the general procedure from (*E*)-7-styrylcyclohepta-1,3,5-triene (50.0 mg, 257  $\mu\text{mol}$ ), 1-(trifluoromethyl)-3-vinylbenzene (66.5 mg, 386  $\mu\text{mol}$ ) and gold catalyst **A** (9.9 mg, 13  $\mu\text{mol}$ ). The crude residue was purified by flash chromatography (40 g  $\text{SiO}_2$ , eluent: pentane).

$^1\text{H NMR}$  (400 MHz,  $\text{CDCl}_3$ )  $\delta$  7.53 (br. s, 1H), 7.50 – 7.36 (m, 3H), 7.22 (m, 2H), 7.15 (m, 3H), 6.54 (d,  $J = 15.7$  Hz, 1H), 5.48 (dd,  $J = 15.7, 9.3$  Hz, 1H), 2.48 (m, 1H), 2.10 (m, 1H), 1.44 (m, 1H), 1.18 (m, 1H).

$^{13}\text{C NMR}$  (101 MHz,  $\text{CDCl}_3$ )  $\delta$  140.0, 137.6, 132.7 (q,  $J = 1.2$  Hz), 130.6 (q,  $J = 31.9$  Hz), 130.6, 129.5, 128.6, 128.6, 127.0, 126.0 (q,  $J = 3.7$  Hz), 125.8, 123.1 (q,  $J = 3.9$  Hz), 23.7, 22.9, 12.8.

HRMS-APCI: calculated for  $\text{C}_{18}\text{H}_{15}\text{F}_3$   $[\text{M}+\text{H}]^+$ : 289.1186; found: 289.1199.

### *Cis*-(*E*)-1-methyl-2-(2-styrylcyclopropyl)benzene (**3p**)

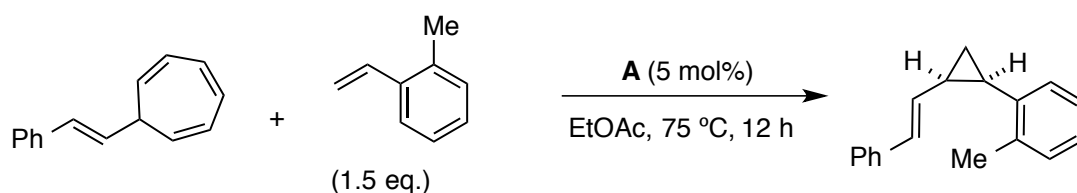

This compound (colorless oil, 38.2 mg, 65%, d.r. >20:1) was prepared according to the general procedure from (*E*)-7-styrylcyclohepta-1,3,5-triene (49.0 mg, 25  $\mu\text{mol}$ ), 1-methyl-2-vinylbenzene (49.0  $\mu\text{L}$ , 375  $\mu\text{mol}$ ) and gold catalyst **A** (9.7 mg, 12.5  $\mu\text{mol}$ ). The crude residue was purified by flash chromatography (40 g  $\text{SiO}_2$ , eluent: pentane).

$^1\text{H NMR}$  (500 MHz,  $\text{CDCl}_3$ )  $\delta$  7.26 – 7.10 (m, 9H), 6.53 (d,  $J = 15.8$  Hz, 1H), 5.37 (dd,  $J = 15.8, 9.8$  Hz, 1H), 2.37 (m, 1H), 2.36 (s, 3H), 2.12 (qd,  $J = 8.5, 5.1$  Hz, 1H), 1.41 (td,  $J = 8.4, 5.2$  Hz, 1H), 1.18 (dt,  $J = 6.7, 5.3$  Hz, 1H).

$^{13}\text{C NMR}$  (126 MHz,  $\text{CDCl}_3$ )  $\delta$  138.85, 137.77, 137.06, 130.77, 129.61, 129.17, 128.45, 128.35, 126.49, 126.35, 125.61, 125.47, 22.90, 22.10, 19.71, 12.37.

HRMS-APCI: calculated for  $\text{C}_{18}\text{H}_{19}$   $[\text{M}+\text{H}]^+$ : 235.1481; found: 235.1471.

### *Cis-(E)*-1-fluoro-2-(2-styrylcyclopropyl)benzene (**3q**)

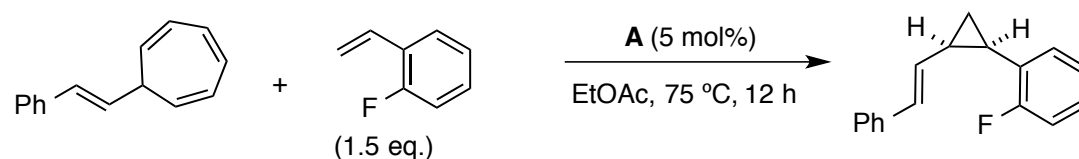

This compound (colorless oil, 36.0 mg, 60%, d.r. >20:1) was prepared according to the general procedure from *(E)*-7-styrylcyclohepta-1,3,5-triene (49.0 mg, 25  $\mu$ mol), 1-fluoro-2-vinylbenzene (45.0  $\mu$ L, 375  $\mu$ mol) and gold catalyst **A** (9.7 mg, 12.5  $\mu$ mol). The crude residue was purified by flash chromatography (40 g SiO<sub>2</sub>, eluent: pentane).

<sup>1</sup>H NMR (500 MHz, CDCl<sub>3</sub>)  $\delta$  7.24 – 7.18 (m, 4H), 7.16 – 7.12 (m, 3H), 7.12 – 7.08 (m, 1H), 7.05 – 7.00 (m, 1H), 6.54 (d,  $J$  = 15.7 Hz, 1H), 5.52 (dd,  $J$  = 15.7, 9.3 Hz, 1H), 2.48 (q,  $J$  = 8.3 Hz, 1H), 2.13 (qd,  $J$  = 8.8, 5.6 Hz, 1H), 1.42 (td,  $J$  = 8.4, 5.3 Hz, 1H), 1.22 – 1.15 (m, 1H).

<sup>13</sup>C NMR (126 MHz, CDCl<sub>3</sub>)  $\delta$  162.73 (d,  $J$  = 246.2 Hz), 137.65, 129.94, 129.86 (d,  $J$  = 4.2 Hz), 129.78, 128.37, 127.72 (d,  $J$  = 8.1 Hz), 126.63, 126.00 (d,  $J$  = 14.8 Hz), 125.68, 123.52 (d,  $J$  = 3.6 Hz), 115.10 (d,  $J$  = 21.8 Hz), 22.12, 18.06 (d,  $J$  = 3.6 Hz), 11.78

<sup>19</sup>F NMR (376 MHz, CDCl<sub>3</sub>)  $\delta$  -116.71 (dt,  $J$  = 10.3, 6.6 Hz).

HRMS-APCI: calculated for C<sub>17</sub>H<sub>16</sub>F [M+H]<sup>+</sup>: 239.1231; found: 239.1227.

### *Cis*-1-bromo-2-(2-((*E*)-styryl)cyclopropyl)benzene (**3r**)

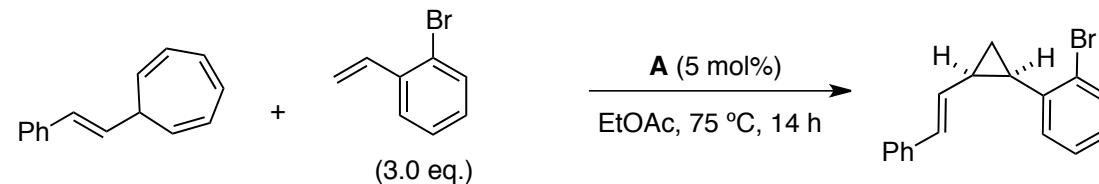

This compound (colorless oil, 51 mg, 66%, d.r. >20:1) was prepared according to the general procedure from *(E)*-7-styrylcyclohepta-1,3,5-triene (50.0 mg, 257  $\mu$ mol), 1-bromo-2-vinylbenzene (141 mg, 772  $\mu$ mol) and gold catalyst **A** (9.9 mg, 13  $\mu$ mol). The crude residue was purified by flash chromatography (40 g SiO<sub>2</sub>, eluent: pentane).

<sup>1</sup>H NMR (400 MHz, CDCl<sub>3</sub>)  $\delta$  7.58 (dd,  $J$  = 7.9, 1.1 Hz, 1H), 7.33 – 7.19 (m, 4H), 7.19 – 7.08 (m, 4H), 6.54 (d,  $J$  = 15.7 Hz, 1H), 5.43 (dd,  $J$  = 15.7, 9.2 Hz, 1H), 2.52 (m, 1H), 2.21 (m, 1H), 1.46 (m, 1H), 1.22 (m, 1H).

<sup>13</sup>C NMR (101 MHz, CDCl<sub>3</sub>)  $\delta$  138.5, 137.9, 132.6, 130.2, 130.0, 129.7, 128.5, 127.9, 127.3, 127.0, 126.7, 125.8, 25.6, 22.9, 12.9.

HRMS-APCI: calculated for C<sub>17</sub>H<sub>16</sub>Br [M+H]<sup>+</sup>: 299.0422; found: 299.0430.



### *Cis*-1,3,5-trimethyl-2-(2-((*E*)-styryl)cyclopropyl)benzene (3s)

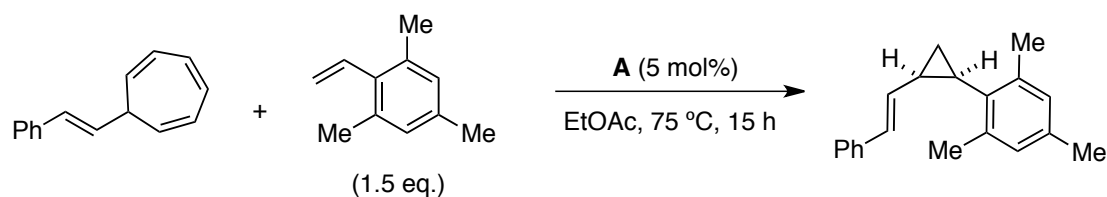

This compound (colorless oil, 31.5 mg, 37%, d.r. >20:1) was prepared according to the general procedure from (*E*)-7-styrylcyclohepta-1,3,5-triene (50.0 mg, 257  $\mu\text{mol}$ ), 1,3,5-trimethyl-2-vinylbenzene (56.6 mg, 386  $\mu\text{mol}$ ) and gold catalyst **A** (9.9 mg, 13  $\mu\text{mol}$ ). The crude residue was purified by flash chromatography (40 g  $\text{SiO}_2$ , eluent: pentane).

$^1\text{H NMR}$  (400 MHz,  $\text{CDCl}_3$ )  $\delta$  7.30 – 7.19 (m, 2H), 7.18 – 7.08 (m, 3H), 6.83 (m, 2H), 6.54 (d,  $J = 15.8$  Hz, 1H), 5.41 (dd,  $J = 15.8, 9.8$  Hz, 1H), 2.39 (s, 6H), 2.29 (s, 3H), 2.19 (m, 1H), 2.09 (m, 1H), 1.63 – 1.51 (m, 1H), 0.92 (m, 1H).

$^{13}\text{C NMR}$  (126 MHz,  $\text{CDCl}_3$ )  $\delta$  138.1 , 135.7 , 132.4 , 132.2 , 129.0 (two signals), 128.9 , 128.5 , 126.6 , 125.8 , 22.75 , 21.0 , 20.9 (two signals), 16.5 .

**HRMS-APCI**: calculated for  $\text{C}_{20}\text{H}_{23}$   $[\text{M}+\text{H}]^+$ : 263.1789; found: 263.1794.

### *Cis*-2-(2-((*E*)-styryl)cyclopropyl)naphthalene (3t)

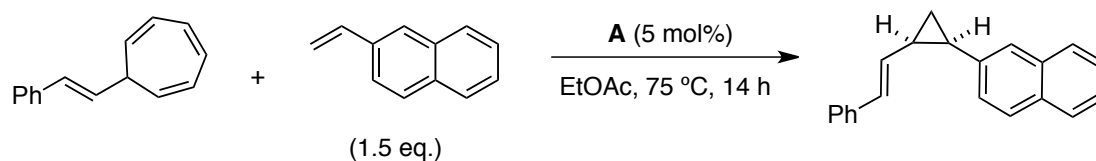

This compound (white solid, 50.5 mg, 73%, d.r. >20:1) was prepared according to the general procedure from (*E*)-7-styrylcyclohepta-1,3,5-triene (50.0 mg, 257  $\mu\text{mol}$ ), 2-vinylnaphthalene (60 mg, 386  $\mu\text{mol}$ ) and gold catalyst **A** (9.9 mg, 13  $\mu\text{mol}$ ). The crude residue was purified by flash chromatography (40 g  $\text{SiO}_2$ , eluent: pentane).

The stereochemistry was confirmed by 1D NOESY experiments<sup>6</sup> (see spectral data for full details).

$^1\text{H NMR}$  (400 MHz,  $\text{CDCl}_3$ )  $\delta$  7.87 – 7.82 (m, 2H), 7.80 (m, 1H), 7.77 – 7.74 (m, 1H), 7.59 – 7.37 (m, 3H), 7.25 – 7.03 (m, 5H), 6.59 (d,  $J = 15.7$  Hz, 1H), 5.58 (dd,  $J = 15.7, 9.5$  Hz, 1H), 2.81 – 2.52 (m, 1H), 2.28 – 2.04 (m, 1H), 1.49 (, 1H), 1.32 (, 1H).

$^{13}\text{C NMR}$  (101 MHz,  $\text{CDCl}_3$ )  $\delta$  137.7 , 136.6 , 133.6 , 132.3 , 130.6 , 129.8 , 128.5 , 128.3 , 127.8 (two signals) , 127.7 , 127.4 , 126.7 , 126.0 , 125.8 , 125.4 , 24.3 , 23.1 , 12.9.

**M.p.:** 73-74 °C.

**HRMS-APCI**: calculated for  $\text{C}_{21}\text{H}_{19}$   $[\text{M}+\text{H}]^+$ : 271.1492; found: 271.1481.

### *Cis*-(1-methyl-2-((*E*)-styryl)cyclopropyl)benzene (**3u**)

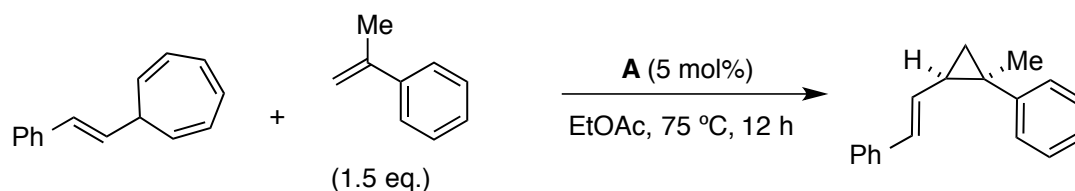

This compound (colorless oil, 42.9 mg, 73%, d.r. 5:1) was prepared according to the general procedure from (*E*)-7-styrylcyclohepta-1,3,5-triene (49.0 mg, 25  $\mu$ mol),  $\alpha$ -methylstyrene (49.0  $\mu$ L, 375  $\mu$ mol) and gold catalyst **A** (9.7 mg, 12.5  $\mu$ mol). The crude residue was purified by flash chromatography (40 g SiO<sub>2</sub>, eluent: pentane).

The stereochemistry was confirmed by 1D NOESY experiments<sup>6</sup> (see spectral data for full details).

<sup>1</sup>H NMR (500 MHz, CDCl<sub>3</sub>)  $\delta$  7.36 – 7.31 (m, 5H), 7.24 – 7.21 (m, 3H), 7.15 – 7.12 (m, 2H), 6.49 (d,  $J$  = 15.8 Hz, 1H), 5.33 (dd,  $J$  = 15.8, 9.8 Hz, 1H), 1.85 (ddd,  $J$  = 5.9, 7.6, 9.8 Hz, 1H), 1.48 (s, 3H), 1.21 – 1.18 (m, 2H).

<sup>13</sup>C NMR (126 MHz, CDCl<sub>3</sub>)  $\delta$  143.5, 137.9, 132.7, 129.6, 128.4, 128.3, 128.1, 126.4, 126.2, 125.6, 29.7, 28.8, 22.3, 21.1.

HRMS-APCI: calculated for C<sub>18</sub>H<sub>19</sub> [M+H]<sup>+</sup>: 235.1481; found: 235.1483.

### *Cis*-(*E*)-(2-styrylcyclopropane-1,1-diyl)dibenzene (**3v**)

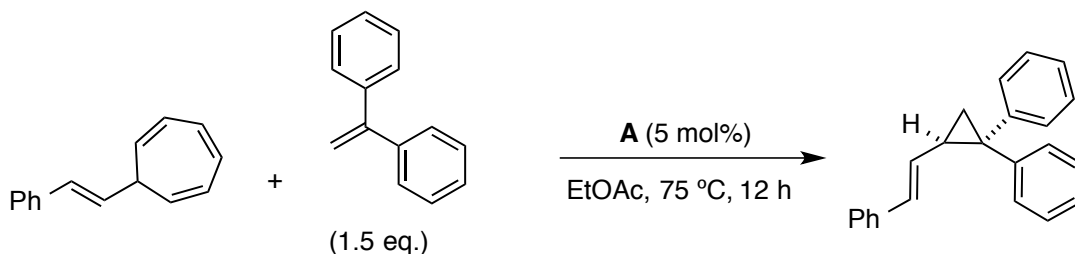

This compound (colorless oil, 54.4 mg, 73%) was prepared according to the general procedure from (*E*)-7-styrylcyclohepta-1,3,5-triene (49.0 mg, 25  $\mu$ mol), ethene-1,1-diyl dibenzene (66.0  $\mu$ L, 375  $\mu$ mol) and gold catalyst **A** (9.7 mg, 12.5  $\mu$ mol). The crude residue was purified by flash chromatography (40 g SiO<sub>2</sub>, eluent: pentane).

<sup>1</sup>H NMR (500 MHz, CDCl<sub>3</sub>)  $\delta$  7.46 – 7.42 (m, 2H), 7.35 (td,  $J$  = 7.6, 1.8 Hz, 2H), 7.31 – 7.23 (m, 7H), 7.21 – 7.16 (m, 4H), 6.60 (dd,  $J$  = 15.7, 2.0 Hz, 1H), 5.51 (ddd,  $J$  = 15.7, 9.7, 2.2 Hz, 1H), 2.45 (tdd,  $J$  = 8.5, 5.9, 1.8 Hz, 1H), 1.78 (ddd,  $J$  = 8.6, 5.0, 1.8 Hz, 1H), 1.66 – 1.62 (m, 1H).

<sup>13</sup>C NMR (126 MHz, CDCl<sub>3</sub>)  $\delta$  146.48, 141.35, 137.69, 131.67, 131.02, 129.16, 128.45, 128.37, 128.33, 127.15, 126.71, 126.67, 125.88, 125.77, 37.64, 31.13, 22.92.

HRMS-APCI: calculated for C<sub>23</sub>H<sub>20</sub>Na [M+Na]<sup>+</sup>: 319.1457; found: 319.1463.

### *Cis-(E)*-(2-(2-methyl-3-phenylcyclopropyl)vinyl)benzene (**3w**)

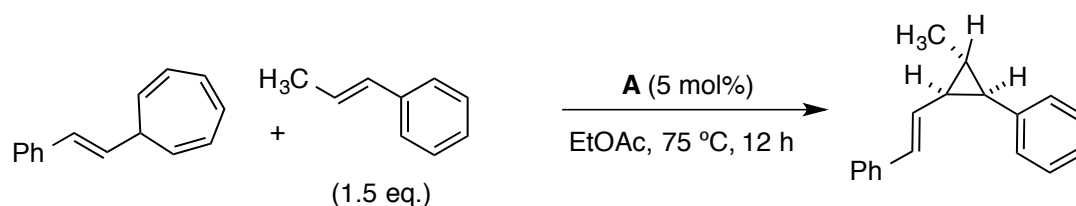

This compound (colorless oil, 26.6 mg, 45%, d.r. 3:1) was prepared according to the general procedure from (*E*)-7-styrylcyclohepta-1,3,5-triene (49.0 mg, 25  $\mu$ mol), (*E*)-prop-1-en-1-ylbenzene (50.0  $\mu$ L, 375  $\mu$ mol) and gold catalyst **A** (9.7 mg, 12.5  $\mu$ mol). The crude residue was purified by flash chromatography (24 g SiO<sub>2</sub>, eluent: pentane).

The stereochemistry was confirmed by 1D NOESY experiments<sup>6</sup> (see spectral data for full details).

<sup>1</sup>H NMR (500 MHz, CDCl<sub>3</sub>)  $\delta$  7.33 – 7.29 (m, 2H), 7.23 (m, 4H), 7.18 – 7.10 (m, 4H), 6.50 (d,  $J$  = 15.7 Hz, 1H), 5.62 (dd,  $J$  = 15.7, 9.6 Hz, 1H), 2.21 – 2.17 (dd,  $J$  = 6.27, 8.83 Hz, 1H), 1.78 (td,  $J$  = 9.2, 4.9 Hz, 1H), 1.53 (dq,  $J$  = 11.6, 5.9 Hz, 1H).

<sup>13</sup>C NMR (126 MHz, CDCl<sub>3</sub>)  $\delta$  139.02, 137.80, 130.34, 129.17, 128.94, 128.36, 128.09, 126.48, 125.88, 125.60, 32.56, 31.75, 20.94, 18.55.

HRMS-APCI: calculated for C<sub>18</sub>H<sub>19</sub> [M+H]<sup>+</sup>: 235.1481; found: 235.1487.

### *Cis-(E)*-(2-(2,2-dimethyl-3-phenylcyclopropyl)vinyl)benzene (**3x**)

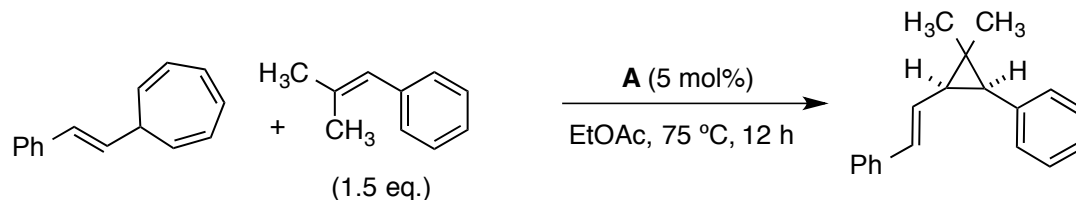

This compound (colorless oil, 21.5 mg, 35%, d.r. 8:1) was prepared according to the general procedure from (*E*)-7-styrylcyclohepta-1,3,5-triene (49.0 mg, 25  $\mu$ mol), (2-methylprop-1-en-1-yl)benzene (50.0  $\mu$ L, 375  $\mu$ mol) and gold catalyst **A** (9.7 mg, 12.5  $\mu$ mol). The crude residue was purified by flash chromatography (24 g SiO<sub>2</sub>, eluent: pentane).

The stereochemistry was confirmed by 1D NOESY experiments<sup>6</sup> (see spectral data for full details).

<sup>1</sup>H NMR (500 MHz, CDCl<sub>3</sub>)  $\delta$  7.34 – 7.14 (m, 10H), 6.59 (d,  $J$  = 15.7 Hz, 1H), 5.79 (dd,  $J$  = 15.7, 10.3 Hz, 1H), 2.24 (d,  $J$  = 8.8 Hz, 1H), 1.87 (dd,  $J$  = 10.2, 9.0 Hz, 1H), 1.35 (s, 3H), 1.07 (s, 3H).

<sup>13</sup>C NMR (126 MHz, CDCl<sub>3</sub>)  $\delta$  138.09, 137.64, 131.13, 129.58, 129.33, 128.47, 128.04, 126.50, 126.04, 125.66, 34.95, 32.81, 28.93, 23.61, 17.83.

HRMS-APCI: calculated for C<sub>19</sub>H<sub>21</sub> [M-H]<sup>+</sup>: 249.1638; found: 249.1643.

### 1-((*E*)-Styryl)-1,1a,6,6a-tetrahydrocyclopropa[*a*]indene (3y)

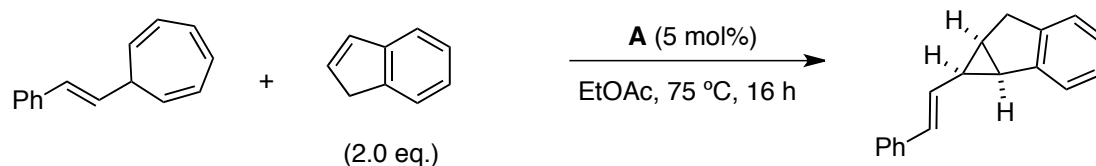

This compound (colorless oil, 51 mg, 85%, d.r. >20:1) was prepared according to the general procedure from (*E*)-7-styrylcyclohepta-1,3,5-triene (50.0 mg, 257  $\mu\text{mol}$ ), indene (59.8 mg, 515  $\mu\text{mol}$ ) and gold catalyst A (9.9 mg, 13  $\mu\text{mol}$ ). The crude residue was purified by flash chromatography (40 g  $\text{SiO}_2$ , eluent: pentane).

$^1\text{H NMR}$  (500 MHz,  $\text{CDCl}_3$ )  $\delta$  7.40 – 7.33 (m, 1H), 7.29 – 7.20 (m, 5H), 7.20 – 7.10 (m, 3H), 6.67 (d,  $J = 15.8$  Hz, 1H), 5.41 (dd,  $J = 15.8, 9.3$  Hz, 1H), 3.30 (dd,  $J = 17.4, 7.1$  Hz, 1H), 3.02 (d,  $J = 17.4$  Hz, 1H), 2.95 – 2.87 (m, 1H), 2.30 – 2.23 (m, 1H), 2.09 (dd,  $J = 17.1, 8.4$  Hz, 1H).

$^{13}\text{C NMR}$  (126 MHz,  $\text{CDCl}_3$ )  $\delta$  143.7, 142.4, 137.9, 132.0, 128.5, 126.8, 126.5, 126.1, 125.9, 125.8, 124.7, 124.2, 32.3, 32.0, 26.2, 24.3.

HRMS-APCI: calculated for  $\text{C}_{18}\text{H}_{17} [\text{M}+\text{H}]^+$ : 233.1322; found: 232.1325.

### Endo-6a-methyl-1-((*E*)-styryl)-1,1a,6,6a-tetrahydrocyclopropa[*a*]indene (3z)

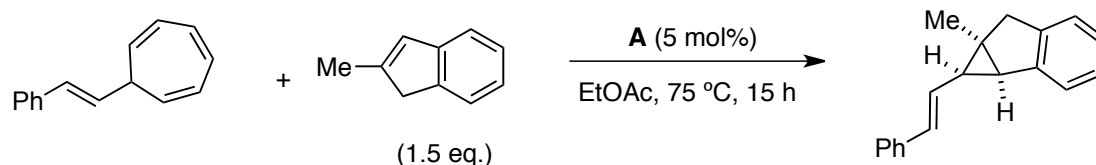

This compound (white solid, 41.5 mg, 66%, d.r. >20:1) was prepared according to the general procedure from (*E*)-7-styrylcyclohepta-1,3,5-triene (50.0 mg, 257  $\mu\text{mol}$ ), 2-methyl-1H-indene (50.3 mg, 386  $\mu\text{mol}$ ) and gold catalyst A (9.9 mg, 13  $\mu\text{mol}$ ). The crude residue was purified by flash chromatography (40 g  $\text{SiO}_2$ , eluent: pentane).

$^1\text{H NMR}$  (400 MHz,  $\text{CDCl}_3$ )  $\delta$  7.36 – 7.31 (m, 1H), 7.30 – 7.10 (m, 8H), 6.67 (d,  $J = 15.8$  Hz, 1H), 5.45 (dd,  $J = 15.8, 9.4$  Hz, 1H), 3.18 – 3.04 (m, 2H), 2.66 (dd,  $J = 7.9, 0.7$  Hz, 1H), 2.01 (dd,  $J = 9.2, 8.2$  Hz, 1H), 1.56 (s, 3H).

$^{13}\text{C NMR}$  (101 MHz,  $\text{CDCl}_3$ )  $\delta$  143.7, 143.1, 137.8, 131.5, 128.4, 126.6, 126.4, 126.3, 125.8, 125.6, 124.3, 124.0, 38.6, 38.5, 33.7, 31.9, 22.8.

M.p.: 65-67 °C.

HRMS-APCI: calculated for  $\text{C}_{19}\text{H}_{19} [\text{M}+\text{H}]^+$ : 247.1481; found: 247.1483.

**Endo-5-bromo-6a-methyl-1-((E)-styryl)-1,1a,6,6a-tetrahydrocyclopropa[a]indene (3aa)**

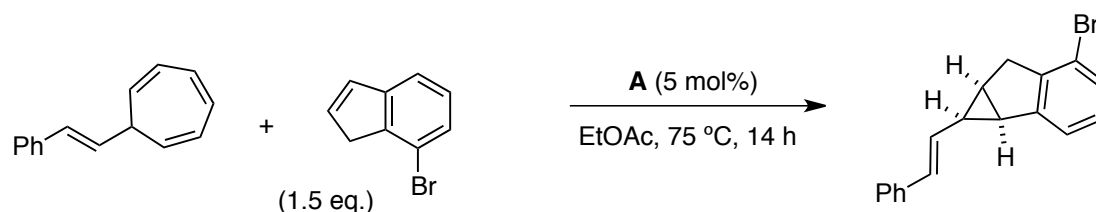

This compound (yellow solid, 56.5 mg, 71%, d.r. >20:1) was prepared according to the general procedure from (*E*)-7-styrylcyclohepta-1,3,5-triene (50.0 mg, 257  $\mu\text{mol}$ ), 7-bromo-1H-indene (75 mg, 386  $\mu\text{mol}$ ) and gold catalyst **A** (9.9 mg, 13  $\mu\text{mol}$ ). The crude residue was purified by flash chromatography (40 g SiO<sub>2</sub>, eluent: pentane).

<sup>1</sup>H NMR (400 MHz, CDCl<sub>3</sub>)  $\delta$  7.35 – 7.30 (m, 1H), 7.25 – 7.20 (m, 3H), 7.17 – 7.09 (m, 3H), 7.07 – 7.02 (m, 1H), 6.63 (d, *J* = 15.8 Hz, 1H), 5.34 (dd, *J* = 15.8, 9.3 Hz, 1H), 3.21 (dd, *J* = 18.1, 7.0 Hz, 1H), 3.00 (d, *J* = 18.1 Hz, 1H), 2.91 (ddd, *J* = 7.9, 6.1, 1.8 Hz, 1H), 2.25 (dddd, *J* = 8.1, 7.0, 6.1, 0.9 Hz, 1H), 2.06 (dd, *J* = 17.2, 8.3 Hz, 1H).

<sup>13</sup>C NMR (101 MHz, CDCl<sub>3</sub>)  $\delta$  144.4, 144.1, 137.6, 132.7, 129.2, 128.6, 128.5, 127.0, 125.8, 124.8, 123.6, 119.3, 34.1, 32.8, 26.1, 23.7.

**M.p.:** 75-76 °C.

**HRMS-APCI:** calculated for C<sub>19</sub>H<sub>19</sub> [M+H]<sup>+</sup>: 247.1483; found: 247.1481.

**Endo-1-((E)-styryl)-1a,2,3,7b-tetrahydro-1H-cyclopropa[a]naphthalene (3ab)**

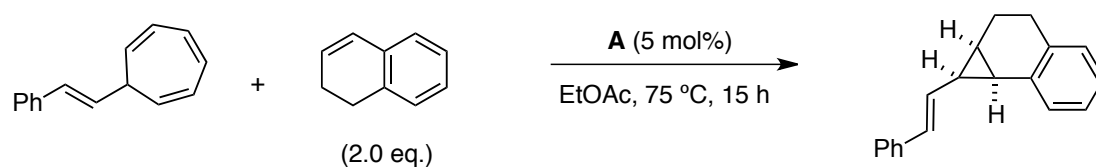

This compound (viscous colorless solid, 31.5 mg, 50%, d.r. >20:1) was prepared according to the general procedure from (*E*)-7-styrylcyclohepta-1,3,5-triene (50.0 mg, 257  $\mu\text{mol}$ ), 1,2-dihydronaphthalene (67 mg, 515  $\mu\text{mol}$ ) and gold catalyst **A** (9.9 mg, 13  $\mu\text{mol}$ ). The crude residue was purified by flash chromatography (40 g SiO<sub>2</sub>, eluent: pentane).

<sup>1</sup>H NMR (400 MHz, CDCl<sub>3</sub>)  $\delta$  7.31 – 7.26 (m, 1H), 7.24 – 7.08 (m, 8H), 6.55 (d, *J* = 15.8 Hz, 1H), 5.64 (dd, *J* = 15.8, 8.9 Hz, 1H), 2.81 (m, 1H), 2.57 – 2.47 (m, 1H), 2.36 (m, 1H), 2.14 – 2.04 (m, 2H), 2.02 – 1.93 (m, 1H), 1.81 (ddd, *J* = 15.0, 8.8, 3.7 Hz, 1H).

<sup>13</sup>C NMR (101 MHz, CDCl<sub>3</sub>)  $\delta$  138.0, 136.6, 135.0, 131.5, 130.2, 128.5 (two signals), 127.6, 126.8, 126.3, 125.80, 125.77, 28.6, 27.9, 21.0, 20.0, 19.2.

**HRMS-APCI:** calculated for C<sub>19</sub>H<sub>19</sub> [M+H]<sup>+</sup>: 247.1489 found: 247.1481.

**Endo-1-((*E*)-styryl)-1,1a,2,7b-tetrahydrocyclopropa[*c*]chromene (3ac)**

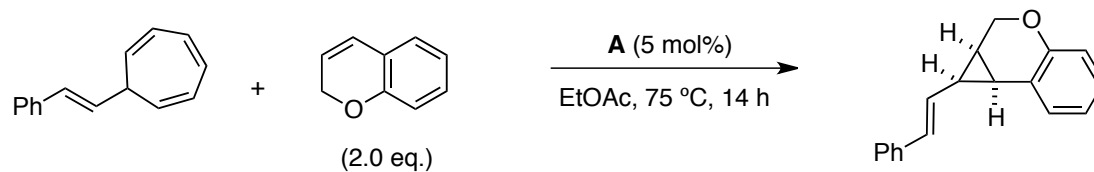

This compound (white solid, 36 mg, 56%, d.r. >20:1) was prepared according to the general procedure from (*E*)-7-styrylcyclohepta-1,3,5-triene (50.0 mg, 257  $\mu\text{mol}$ ), 2H-chromene (68 mg, 515  $\mu\text{mol}$ ) and gold catalyst **A** (9.9 mg, 13  $\mu\text{mol}$ ). The crude residue was purified by flash chromatography (40 g SiO<sub>2</sub>, eluent: gradient from 0.5% Et<sub>2</sub>O in pentane to 1.5% Et<sub>2</sub>O in pentane).

<sup>1</sup>H NMR (400 MHz, CDCl<sub>3</sub>)  $\delta$  7.31 – 7.21 (m, 5H), 7.21 – 7.11 (m, 2H), 6.99 – 6.88 (m, 2H), 6.60 (d, *J* = 15.8 Hz, 1H), 6.05 (dd, *J* = 15.8, 9.6 Hz, 1H), 4.45 (dd, *J* = 11.2, 0.8 Hz, 1H), 4.24 (dd, *J* = 11.2, 3.0 Hz, 1H), 2.48 – 2.42 (m, 1H), 2.26 (dd, *J* = 17.7, 8.6 Hz, 1H), 2.00 – 1.92 (m, 1H).

<sup>13</sup>C NMR (101 MHz, CDCl<sub>3</sub>)  $\delta$  152.3, 137.7, 132.5, 129.8, 128.5, 127.2, 126.9, 126.4, 126.0, 122.6, 121.5, 117.1, 62.0, 28.4, 22.9, 18.6.

**M.p.:** 88-90 °C.

**HRMS-APCI:** calculated for C<sub>18</sub>H<sub>17</sub>O [M+H]<sup>+</sup>: 249.1269; found: 249.1274.

## 5. Cyclopropanation with different cycloheptatriene derivatives

### *Cis-(E)-1-(2-(4-methoxystyryl)cyclopropyl)-3-methylbenzene (3ad)*

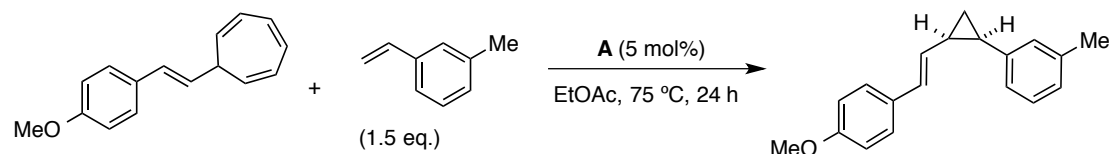

This compound (colorless oil, 31.8 mg, 48%, d.r. 12:1) was prepared according to the general procedure from (*E*)-7-(4-methoxystyryl)cyclohepta-1,3,5-triene (56.0 mg, 25  $\mu$ mol), 1-methyl-3-vinylbenzene (50.0  $\mu$ L, 375  $\mu$ mol) and gold catalyst **A** (9.7 mg, 12.5  $\mu$ mol). The crude residue was purified by flash chromatography (80 g SiO<sub>2</sub>, eluent: pentane).

<sup>1</sup>H NMR (300 MHz, CDCl<sub>3</sub>)  $\delta$  7.27 (dd,  $J$  = 6.3, 2.3 Hz, 2H), 7.19 (t,  $J$  = 7.5 Hz, 1H), 7.01 (t,  $J$  = 7.6 Hz, 1H), 6.92 (dd,  $J$  = 9.3, 1.8 Hz, 2H), 6.88 – 6.82 (m, 2H), 6.44 (d,  $J$  = 15.8 Hz, 1H), 5.79 (dd,  $J$  = 15.8, 8.6 Hz, 1H), 3.82 (s, 3H), 2.35 (s, 3H), 2.00 (ddd,  $J$  = 8.6, 5.8, 4.2 Hz, 1H), 1.87 – 1.75 (m, 1H), 1.34 – 1.27 (m, 1H), 1.20 (dt,  $J$  = 8.7, 5.3 Hz, 1H).

<sup>13</sup>C NMR (126 MHz, CDCl<sub>3</sub>)  $\delta$  158.63, 142.24, 137.93, 130.73, 130.43, 128.27, 127.62, 126.77, 126.51, 126.40, 122.67, 113.96, 55.29, 27.29, 25.57, 21.43, 16.94.

HRMS-APCI: calculated for C<sub>19</sub>H<sub>21</sub>O [M+H]<sup>+</sup>: 265.1587; found: 265.1575.

### *cis-1-(4-((E)-2-(2-(m-tolyl)cyclopropyl)vinyl)phenyl)ethanone (3ae)*

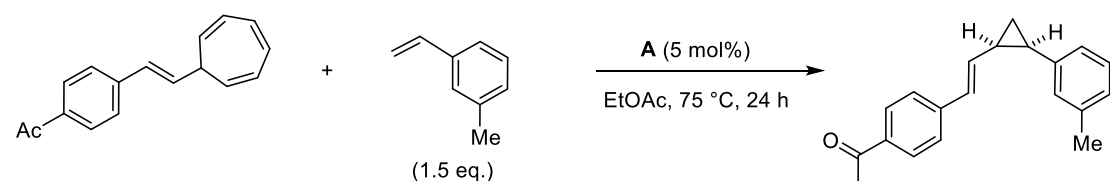

This compound (colorless oil, 61.5 mg, 87%, d.r. >20:1) was prepared according to the general procedure from (*E*)-1-(4-(2-(cyclohepta-2,4,6-trien-1-yl)vinyl)phenyl)ethan-1-one (60.7 mg, 257  $\mu$ mol), 1-methyl-3-vinylbenzene (45.6 mg, 386  $\mu$ mol) and gold catalyst **A** (9.9 mg, 13  $\mu$ mol). The crude residue was purified by flash chromatography (40 g SiO<sub>2</sub>, gradient: pentane to 50% Et<sub>2</sub>O).

<sup>1</sup>H NMR (500 MHz, CDCl<sub>3</sub>)  $\delta$  7.84 – 7.77 (m, 2H), 7.23 – 7.16 (m, 3H), 7.11 – 7.08 (m, 1H), 7.07 – 7.01 (m, 2H), 6.54 (d,  $J$  = 15.7 Hz, 1H), 5.69 (dd,  $J$  = 15.7, 9.7 Hz, 1H), 2.54 (s, 3H), 2.48 (ddd,  $J$  = 8.5, 6.5 Hz, 1H), 2.34 (s, 3H), 2.08 – 1.99 (m, 1H), 1.40 (ddd,  $J$  = 8.4, 5.2 Hz, 1H), 1.19 (ddd,  $J$  = 6.4, 5.4 Hz, 1H).

<sup>13</sup>C NMR (126 MHz, CDCl<sub>3</sub>)  $\delta$  197.6, 142.6, 138.4, 137.9, 135.3, 134.6, 130.2, 128.8, 128.6, 128.2, 127.2, 126.1, 125.7, 26.6, 24.5, 23.1, 21.6, 13.1.

HRMS-ESI: calculated for C<sub>20</sub>H<sub>20</sub>O [M+H]<sup>+</sup>: 277.1587; found: 277.1587.

***Cis-(E)-1-methyl-3-(2-(4-(trifluoromethyl)styryl)cyclopropyl)benzene (3af)***

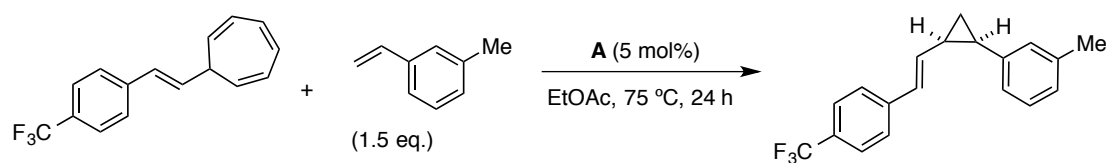

This compound (colorless oil, 59.6 mg, 79%, d.r. 17:1) was prepared according to the general procedure from (*E*)-7-(4-(trifluoromethyl)styryl)cyclohepta-1,3,5-triene (66.0 mg, 25  $\mu$ mol), 1-methyl-3-vinylbenzene (50.0  $\mu$ L, 375  $\mu$ mol) and gold catalyst **A** (9.7 mg, 12.5  $\mu$ mol). The crude residue was purified by flash chromatography (40 g SiO<sub>2</sub>, eluent: pentane).

<sup>1</sup>H NMR (400 MHz, CDCl<sub>3</sub>)  $\delta$  7.48 – 7.45 (m, 2H), 7.25 – 7.18 (m, 3H), 7.13 – 7.03 (m, 3H), 6.55 (d, *J* = 15.8 Hz, 1H), 5.65 (dd, *J* = 15.8, 9.6 Hz, 1H), 2.49 (td, *J* = 8.5, 6.5 Hz, 1H), 2.36 (d, *J* = 0.8 Hz, 3H), 2.10 – 2.00 (m, 1H), 1.41 (td, *J* = 8.4, 5.2 Hz, 1H), 1.19 (dt, *J* = 6.5, 5.4 Hz, 1H).

<sup>13</sup>C NMR (126 MHz, CDCl<sub>3</sub>)  $\delta$  141.18 , 138.26 , 137.73 , 133.89 , 130.10 , 128.06 , 128.03 , 127.01 , 126.00 , 125.68 , 125.32 (q, *J* = 3.8 Hz), 24.17 , 22.71 , 21.44 , 12.76 .

<sup>19</sup>F NMR (376 MHz, CDCl<sub>3</sub>)  $\delta$  -62.50.

HRMS-APCI: calculated for C<sub>19</sub>H<sub>18</sub>F<sub>3</sub> [M+H]<sup>+</sup>: 303.1355; found: 303.1341.

***Cis-(E)-1-(2-(4-bromostyryl)cyclopropyl)-3-methylbenzene (3ag)***

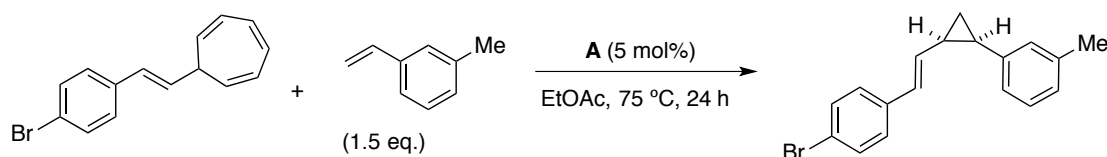

This compound (white solid, 66.4 mg, 85%, d.r. >20:1) was prepared according to the general procedure from (*E*)-7-(4-bromostyryl)cyclohepta-1,3,5-triene (68.0 mg, 250  $\mu$ mol), 1-methyl-3-vinylbenzene (50.0  $\mu$ L, 375  $\mu$ mol) and gold catalyst **A** (9.7 mg, 12.5  $\mu$ mol). The crude residue was purified by flash chromatography (40 g SiO<sub>2</sub>, eluent: 2 to 10% Et<sub>2</sub>O in pentane).

<sup>1</sup>H NMR (500 MHz, CDCl<sub>3</sub>)  $\delta$  7.35 – 7.32 (m, 2H), 7.20 (t, *J* = 7.6 Hz, 1H), 7.10 (bs, 1H), 7.05 (bt, *J* = 7.9 Hz, 2H), 7.03 – 7.00 (m, 2H), 6.46 (d, *J* = 15.7 Hz, 1H), 5.55 (dd, *J* = 15.7, 9.6 Hz, 1H), 2.46 (q, *J* = 8.6 Hz, 1H), 2.02 (qd, *J* = 8.8, 5.5 Hz, 1H), 1.38 (td, *J* = 8.4, 5.2 Hz, 1H), 1.18 ? 1.13 (m, 1H).

<sup>13</sup>C NMR (101 MHz, CDCl<sub>3</sub>)  $\delta$  138.41, 137.66, 136.70, 131.73, 131.41, 130.10, 128.23, 127.98, 127.17, 126.91, 125.99, 120.07, 23.94, 22.67, 21.45, 12.61.

M.p.: 56-60 °C.

HRMS-APCI: calculated for C<sub>18</sub>H<sub>18</sub>Br [M+H]<sup>+</sup>: 313.0586; found: 313.0592.



### *Cis-(E)*-1,3-dimethoxy-5-(2-(2-(*m*-tolyl)cyclopropyl)vinyl)benzene (**3ah**)

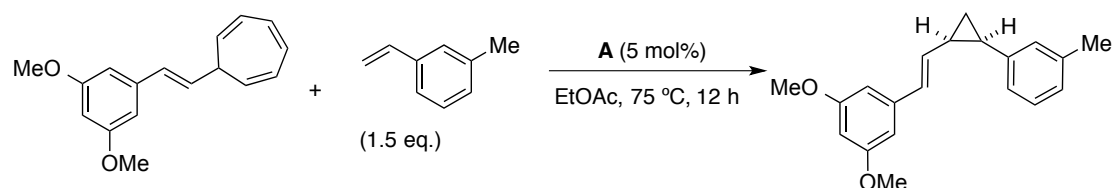

This compound (colorless oil, 50.8 mg, 69%, d.r. >20:1) was prepared according to the general procedure from (*E*)-7-(3,5-dimethoxystyryl)cyclohepta-1,3,5-triene (63.6 mg, 25  $\mu$ mol), 1-methyl-3-vinylbenzene (50.0  $\mu$ L, 375  $\mu$ mol) and gold catalyst **A** (9.7 mg, 12.5  $\mu$ mol). The crude residue was purified by flash chromatography (80 g SiO<sub>2</sub>, eluent: 1% Et<sub>2</sub>O in pentane).

<sup>1</sup>H NMR (400 MHz, CDCl<sub>3</sub>)  $\delta$  7.19 (t,  $J$  = 7.6 Hz, 1H), 7.10 (s, 1H), 7.04 (dd,  $J$  = 14.9, 7.8 Hz, 2H), 6.47 (d,  $J$  = 15.7 Hz, 1H), 6.31 (dd,  $J$  = 12.8, 2.2 Hz, 3H), 5.55 (dd,  $J$  = 15.7, 9.5 Hz, 1H), 3.75 (s, 6H), 2.44 (q,  $J$  = 8.5 Hz, 1H), 2.35 (s, 3H), 2.01 (qd,  $J$  = 8.8, 5.6 Hz, 1H), 1.37 (td,  $J$  = 8.4, 5.2 Hz, 1H), 1.15 (q,  $J$  = 5.5 Hz, 1H).

<sup>13</sup>C NMR (101 MHz, CDCl<sub>3</sub>)  $\delta$  160.73, 139.91, 138.51, 137.58, 131.56, 130.06, 129.32, 127.95, 126.86, 126.02, 103.88, 98.73, 77.34, 55.22, 23.91, 22.60, 21.45, 12.61.

HRMS-APCI: calculated for C<sub>20</sub>H<sub>23</sub>O<sub>2</sub> [M+H]<sup>+</sup>: 295.1693; found: 295.1698.

### *Cis*-1-methyl-3-(2-(2-methylprop-1-en-1-yl)cyclopropyl)benzene (**3ai**)

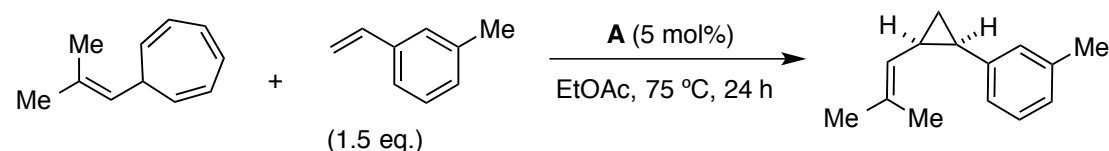

This compound (white crystals, 31.9 mg, 69%, d.r. 9:1) was prepared according to the general procedure from 7-(2-methylprop-1-en-1-yl)cyclohepta-1,3,5-triene (37.0 mg, 25  $\mu$ mol), 1-methyl-3-vinylbenzene (50.0  $\mu$ L, 375  $\mu$ mol) and gold catalyst **A** (9.7 mg, 12.5  $\mu$ mol). The crude residue was purified by flash chromatography (40 g SiO<sub>2</sub>, eluent: pentane).

The stereochemistry was confirmed by 1D NOESY experiments<sup>6</sup> (see spectral data for full details).

<sup>1</sup>H NMR (400 MHz, CDCl<sub>3</sub>)  $\delta$  7.18 (t,  $J$  = 7.5 Hz, 1H), 7.04 – 6.96 (m, 4H), 4.55 (dt,  $J$  = 8.9, 1.3 Hz, 1H), 2.36 (s, 3H), 2.26 (td,  $J$  = 8.6, 6.5 Hz, 1H), 1.89 (qd,  $J$  = 8.8, 5.8 Hz, 1H), 1.74 (d,  $J$  = 1.0 Hz, 4H), 1.61 – 1.60 (m, 4H), 1.25 (td,  $J$  = 8.5, 4.9 Hz, 1H), 0.90 – 0.85 (m, 1H).

<sup>13</sup>C NMR (126 MHz, CDCl<sub>3</sub>)  $\delta$  139.30, 137.31, 132.61, 129.86, 127.71, 126.37, 125.86, 123.10, 25.64, 22.71, 21.46, 18.31, 18.26, 12.32.

HRMS-APCI: calculated for C<sub>14</sub>H<sub>19</sub> [M+H]<sup>+</sup>: 187.1481; found: 187.1480.

### *Cis*-4-((2-(*m*-tolyl)cyclopropyl)methylene)tetrahydro-2*H*-pyran (**3aj**)

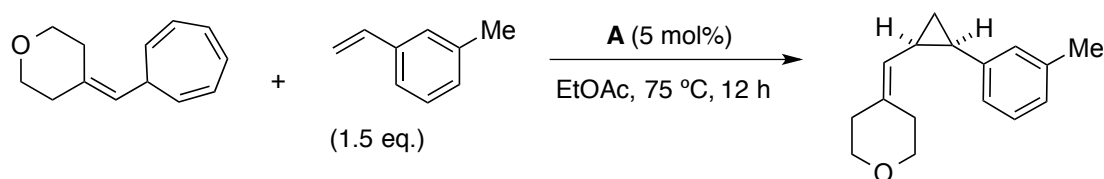

This compound (colorless oil, 40.2 mg, 70%, d.r. 6:1) was prepared according to the general procedure from 4-(cyclohepta-2,4,6-trien-1-ylmethylene)tetrahydro-2*H*-pyran (47.0 mg, 250  $\mu$ mol), 1-methyl-3-vinylbenzene (50.0  $\mu$ L, 375  $\mu$ mol) and gold catalyst **A** (9.7 mg, 12.5  $\mu$ mol). The crude residue was purified by flash chromatography (40 g SiO<sub>2</sub>, eluent: 2 to 10% Et<sub>2</sub>O in pentane).

The stereochemistry was confirmed by 1D NOESY experiments<sup>6</sup> (see spectral data for full details).

**<sup>1</sup>H NMR** (400 MHz, CDCl<sub>3</sub>)  $\delta$  7.18 (t,  $J$  = 7.8 Hz, 1H), 7.05 – 6.95 (m, 3H), 4.61 (d,  $J$  = 8.5 Hz, 1H), 3.71 (dt,  $J$  = 10.7, 5.3 Hz, 2H), 3.64 (ddd,  $J$  = 10.6, 6.2, 4.3 Hz, 1H), 3.49 (ddd,  $J$  = 11.0, 6.9, 4.4 Hz, 2H), 2.38 (td,  $J$  = 5.6, 1.1 Hz, 2H), 2.35 (s, 3H), 2.27 (td,  $J$  = 8.6, 6.5 Hz, 1H), 2.07 (dt,  $J$  = 9.4, 7.2, 5.1 Hz, 2H), 1.89 (qd,  $J$  = 8.6, 5.8 Hz, 1H), 1.28 (td,  $J$  = 8.5, 5.0 Hz, 1H), 0.94 – 0.89 (m, 1H).

**<sup>13</sup>C NMR** (75 MHz, CDCl<sub>3</sub>)  $\delta$  138.97, 137.33, 135.59, 129.85, 127.74, 126.51, 125.90, 121.98, 69.58, 68.66, 36.65, 30.28, 22.97, 21.46, 17.15, 12.57.

**HRMS-APCI**: calculated for C<sub>16</sub>H<sub>20</sub>NaO [M+Na]<sup>+</sup>: 251.1406; found: 251.1405.

### *Cis*-4-((*E*)-2-(2-phenylcyclopropyl)vinyl)-1,1'-biphenyl (**3ak**)

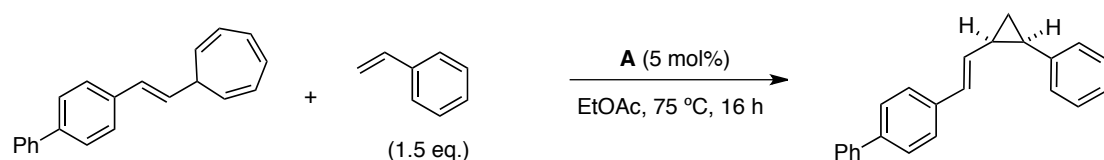

This compound (white solid, 48.5 mg, 64%, d.r. >20:1) was prepared according to the general procedure from (*E*)-4-(2-(cyclohepta-2,4,6-trien-1-yl)vinyl)-1,1'-biphenyl (69.5 mg, 257  $\mu$ mol), styrene (40.2 mg, 386  $\mu$ mol) and gold catalyst **A** (9.9 mg, 13  $\mu$ mol). The crude residue was purified by flash chromatography (40 g SiO<sub>2</sub>, eluent: pentane).

**<sup>1</sup>H NMR** (400 MHz, CDCl<sub>3</sub>)  $\delta$  7.52 (m, 2H), 7.45 – 7.35 (m, 4H), 7.32 – 7.23 (m, 5H), 7.22 – 7.15 (m, 3H), 6.53 (d,  $J$  = 15.7 Hz, 1H), 5.56 (dd,  $J$  = 15.7, 9.5 Hz, 1H), 2.45 (ddd,  $J$  = 8.6, 6.8 Hz, 1H), 2.02 (dddd,  $J$  = 8.8, 5.5 Hz, 1H), 1.36 (ddd,  $J$  = 8.4, 5.2 Hz, 1H), 1.14 (dd,  $J$  = 11.8, 5.4 Hz, 1H).

**<sup>13</sup>C NMR** (75 MHz, CDCl<sub>3</sub>)  $\delta$  141.0, 139.4, 138.8, 136.9, 131.0, 129.3, 129.2, 128.8, 128.3, 127.2 (two signals), 126.9, 126.2, 126.2, 24.1, 22.9, 12.8.

**HRMS-APCI**: calculated for C<sub>23</sub>H<sub>20</sub> [M+H]<sup>+</sup>: 297.1635; found: 297.1638.

**M.p.**: 75-76 °C.

**Endo-1-((E)-2-([1,1'-biphenyl]-4-yl)vinyl)-1,1a,6,6a-tetrahydrocyclopropa[a]indene (3al)**

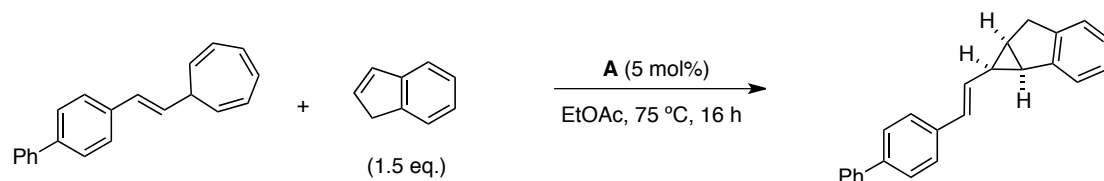

This compound (white solid, 60 mg, 76%, d.r. >20:1) was prepared according to the general procedure from (*E*)-4-(2-(cyclohepta-2,4,6-trien-1-yl)vinyl)-1,1'-biphenyl (69.5 mg, 257  $\mu\text{mol}$ ), indene (44.8 mg, 386  $\mu\text{mol}$ ) and gold catalyst **A** (9.9 mg, 13  $\mu\text{mol}$ ). The crude residue was purified by flash chromatography (40 g  $\text{SiO}_2$ , eluent: pentane).

Suitable crystals for X-ray diffraction were obtained by slow evaporation of a solution in chloroform.

**$^1\text{H NMR}$**  (500 MHz,  $\text{CDCl}_3$ )  $\delta$  7.58 – 7.55 (m, 2H), 7.48 – 7.41 (m, 4H), 7.37 – 7.31 (m, 2H), 7.23 – 7.16 (m, 5H), 6.67 (d,  $J = 15.8$  Hz, 1H), 5.42 (dd,  $J = 15.8, 9.4$  Hz, 1H), 3.28 (dd,  $J = 17.5, 7.0$  Hz, 1H), 3.01 (d,  $J = 17.5$  Hz, 1H), 2.89 (ddd,  $J = 7.7, 6.2, 1.5$  Hz, 1H), 2.26 (dddd,  $J = 7.8, 6.9, 0.7$  Hz, 1H), 2.08 (dd,  $J = 17.2, 8.3$  Hz, 1H).

**$^{13}\text{C NMR}$**  (101 MHz,  $\text{CDCl}_3$ )  $\delta$  143.7, 142.4, 140.9, 139.5, 136.9, 131.5, 128.8, 127.2, 127.2, 126.9, 126.6, 126.2 (two signals), 124.8, 124.3, 32.4, 32.1, 26.3, 24.4.

**HRMS-APCI**: calculated for  $\text{C}_{24}\text{H}_{21}$   $[\text{M}+\text{H}]^+$ : 309.1634; found: 309.1638.

**M.p.**: 146-148 °C.

## 6. Cyclopropanation of *N*-vinylphthalimide

### *Cis*-(*E*)-2-(2-styrylcyclopropyl)isoindoline-1,3-dione (**6a**)

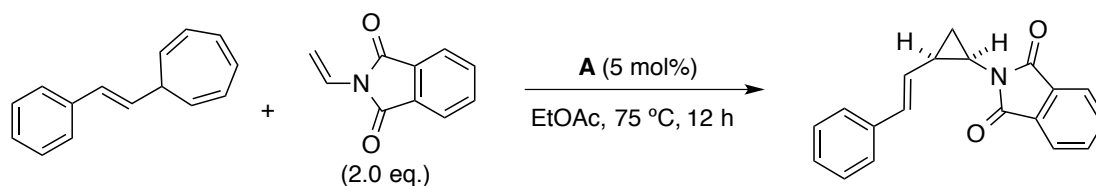

This compound (white solid, 54.1 mg, 75%, d.r. 6:1) was prepared according to the general procedure from (*E*)-7-styrylcyclohepta-1,3,5-triene (49.0  $\mu$ L, 25  $\mu$ mol), *N*-vinylphthalimide (87.0 mg, 500  $\mu$ mol) and gold catalyst **A** (9.7 mg, 12.5  $\mu$ mol). The crude residue was purified by flash chromatography (120 g SiO<sub>2</sub>, eluent: 20% Et<sub>2</sub>O in pentane).

Multi-gram scale: This compound (white solid, 2.14 g, 74%, d.r. 7:1) was prepared according to the general procedure from (*E*)-7-styrylcyclohepta-1,3,5-triene (1.94 g, 10 mmol), *N*-vinylphthalimide (3.46 g, 20 mmol) and gold catalyst **A** (386 mg, 0.5 mmol). The heating was stopped and reaction was quenched after 9 hours by the addition of triethylamine. The crude residue was purified by flash chromatography (330 g SiO<sub>2</sub>, eluent: 0 to 50% Et<sub>2</sub>O in pentane).

<sup>1</sup>H NMR (500 MHz, CDCl<sub>3</sub>)  $\delta$  7.83 (dd, *J* = 5.5, 3.0 Hz, 2H), 7.71 (dd, *J* = 5.5, 3.0 Hz, 2H), 7.26 – 7.17 (m, 4H), 7.17 – 7.12 (m, 1H), 6.48 (d, *J* = 15.8 Hz, 1H), 5.89 (dd, *J* = 15.8, 7.7 Hz, 1H), 3.03 (ddd, *J* = 7.8, 7.1, 4.9 Hz, 1H), 2.18 – 2.10 (m, 1H), 1.78 (td, *J* = 6.8, 4.9 Hz, 1H), 1.55 (ddd, *J* = 8.9, 7.9, 6.7 Hz, 1H).

<sup>13</sup>C NMR (126 MHz, CDCl<sub>3</sub>)  $\delta$  169.05, 137.24, 134.04, 131.65, 131.23, 128.36, 126.98, 126.23, 125.95, 123.24, 28.11, 20.14, 10.70.

M.p.: 146-148 °C.

HRMS-ESI: calculated for C<sub>19</sub>H<sub>15</sub>NNaO<sub>2</sub> [M+Na]<sup>+</sup>: 312.0995; found: 312.0997.

### *Trans*-2-(2-((*E*)-styryl)cyclopropyl)isoindoline-1,3-dione (*trans*-**6a**)

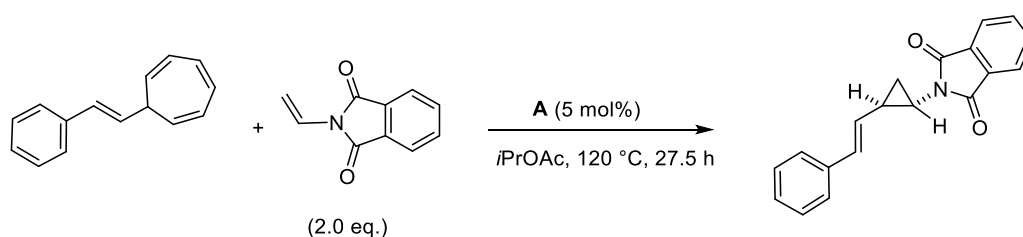

The *trans*-isomer (off-white solid, 41.0 mg, 55%) was prepared from the reaction of (*E*)-7-styrylcyclohepta-1,3,5-triene (50.0 mg, 257  $\mu$ mol) with 2-vinylisoindoline-1,3-dione (89.0 mg, 515  $\mu$ mol) and gold catalyst **A** (9.9 mg, 13  $\mu$ mol) in the presence of diphenylmethane as internal reference (43.3 mg, 257  $\mu$ mol) in *i*PrOAc at 120 °C over 27.5h. The crude was quenched with 0.5 mL Et<sub>3</sub>N and stirred at room temperature for 1h before being charged on silica gel and purified by flash chromatography (40 g SiO<sub>2</sub>, gradient: pentane to 30% Et<sub>2</sub>O, the *trans*-isomer elutes first).

An NMR analysis of the crude against the internal reference shows 55% *trans*-isomer and 13% *cis*-isomer (ratio 4.2 : 1)

*trans*-isomer:

$^1\text{H NMR}$  (500 MHz,  $\text{CDCl}_3$ )  $\delta$  7.85 – 7.80 (m, 2H), 7.73 – 7.68 (m, 2H), 7.38 – 7.33 (m, 2H), 7.33 – 7.27 (m, 2H), 7.23 – 7.18 (m, 1H), 6.60 (d,  $J = 15.8$  Hz, 1H), 6.03 (dd,  $J = 15.8, 7.9$  Hz, 1H), 2.83 (ddd,  $J = 7.8, 4.5, 3.4$  Hz, 1H), 2.25 – 2.13 (m, 1H), 1.58 (ddd,  $J = 9.4, 6.2, 4.5$  Hz, 1H), 1.35 – 1.27 (m, 1H).

$^{13}\text{C NMR}$  (126 MHz,  $\text{CDCl}_3$ )  $\delta$  168.6, 137.3, 134.2, 131.9, 130.4, 129.5, 128.6, 127.2, 126.1, 123.3, 29.5, 21.7, 13.5.

HRMS-ESI: calculated for  $\text{C}_{19}\text{H}_{15}\text{NNaO}_2$   $[\text{M}+\text{Na}]^+$ : 312.0995; found: 312.0997.

M.p.: 99-100 °C.

### *Cis*-(*E*)-2-(2-(4-methoxystyryl)cyclopropyl)isoindoline-1,3-dione (6b)

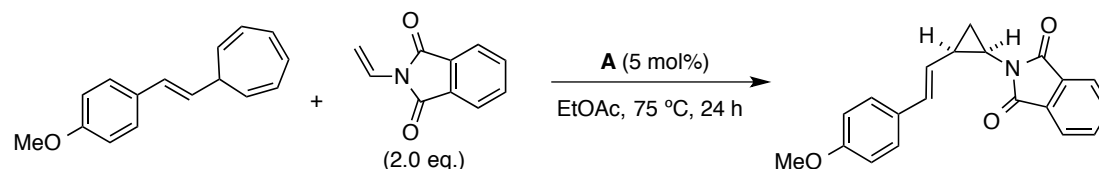

This compound (yellow waxy solid, 41.8 mg, 52%, d.r. 6:1) was prepared according to the general procedure from (*E*)-7-(4-methoxystyryl)cyclohepta-1,3,5-triene (56.0 mg, 25  $\mu\text{mol}$ ), *N*-vinylphthalimide (87.0 mg, 500  $\mu\text{mol}$ ) and gold catalyst **A** (9.7 mg, 12.5  $\mu\text{mol}$ ). The crude residue was purified by flash chromatography (120 g  $\text{SiO}_2$ , eluent: 0 to 60%  $\text{Et}_2\text{O}$  in pentane).

$^1\text{H NMR}$  (300 MHz,  $\text{CDCl}_3$ )  $\delta$  7.86 (dd,  $J = 5.4, 3.1$  Hz, 2H), 7.74 (dd,  $J = 5.5, 3.0$  Hz, 2H), 7.34 – 7.30 (m, 2H), 6.89 – 6.85 (m, 2H), 6.57 (d,  $J = 15.7$  Hz, 1H), 5.92 (dd,  $J = 15.8, 7.7$  Hz, 1H), 3.83 (s, 3H), 2.82 (ddd,  $J = 7.8, 4.5, 3.4$  Hz, 1H), 2.22 – 2.15 (m, 1H), 1.60 – 1.55 (m, 1H), 1.34 – 1.29 (m, 1H).

$^{13}\text{C NMR}$  (126 MHz,  $\text{CDCl}_3$ )  $\delta$  168.55, 158.89, 134.04, 131.82, 130.03, 129.79, 127.10, 127.07, 123.18, 113.95, 55.29, 29.31, 21.54, 13.32.

M.p.: 92-97 °C.

HRMS-APCI: calculated for  $\text{C}_{19}\text{H}_{21}\text{NaO}$   $[\text{M}+\text{Na}]^+$ : 342.1101; found: 342.1097.

### *Cis*-2-(2-((*E*)-4-acetylstyryl)cyclopropyl)isoindoline-1,3-dione (6c)

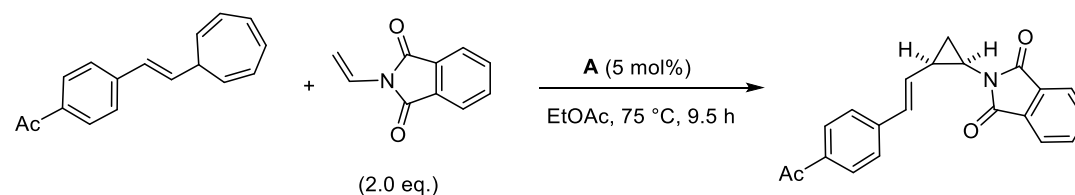

This compound (yellow solid, 54.0 mg, 63%) was prepared according to the general procedure from (*E*)-1-(4-(2-(cyclohepta-2,4,6-trien-1-yl)vinyl)phenyl)ethan-1-one (60.7 mg,

257  $\mu\text{mol}$ ), 2-vinylisoindoline-1,3-dione (89.0 mg, 514  $\mu\text{mol}$ ) and gold catalyst **A** (9.9 mg, 13  $\mu\text{mol}$ ). The crude was quenched with 0.5 mL  $\text{Et}_3\text{N}$  and stirred at room temperature for 1h before being charged on silica gel and purified by flash chromatography (40 g  $\text{SiO}_2$ , gradient: pentane to 75%  $\text{Et}_2\text{O}$ ).

In the reaction crude, only a trace of the *trans*-diastereoisomer was detected (4%).

The stereochemistry was confirmed by 1D NOESY experiments<sup>6</sup> (see spectral data for full details).

**<sup>1</sup>H NMR** (500 MHz,  $\text{CDCl}_3$ )  $\delta$  7.79 (dd,  $J = 5.4, 3.0$  Hz, 2H), 7.77 (d,  $J = 8.3$  Hz, 2H), 7.68 (dd,  $J = 5.4, 3.1$  Hz, 2H), 7.22 (d,  $J = 8.3$  Hz, 2H), 6.49 (d,  $J = 15.8$  Hz, 1H), 5.98 (dd,  $J = 15.8, 8.1$  Hz, 1H), 3.09 – 2.99 (m, 1H), 2.51 (s, 3H), 2.19 – 2.08 (m, 1H), 1.81 – 1.73 (m, 1H), 1.60 – 1.51 (m, 1H).

**<sup>13</sup>C NMR** (126 MHz,  $\text{CDCl}_3$ )  $\delta$  197.5, 169.1, 141.9, 135.7, 134.3, 131.7, 130.2, 129.9, 128.7, 126.0, 123.4, 28.5, 26.6, 20.5, 11.3.

**M.p.:** 176-177  $^\circ\text{C}$ .

**HRMS-ESI:** calculated for  $\text{C}_{21}\text{H}_{17}\text{NNaO}_3$   $[\text{M}+\text{Na}]^+$ : 354.1101; found: 354.1108.

***Cis-(E)-2-(2-(4-(trifluoromethyl)styryl)cyclopropyl)isoindoline-1,3-dione (6d)***

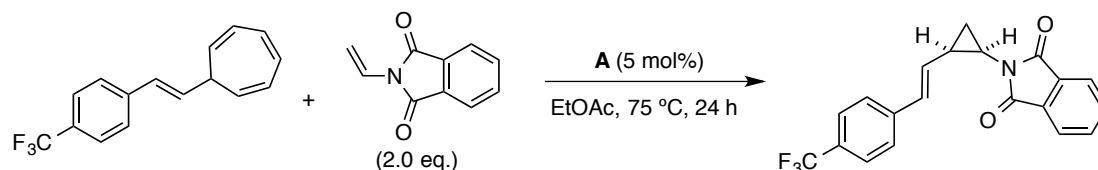

This compound (white solid, 57.8 mg, 79%, d.r. 10:1) was prepared according to the general procedure from (*E*)-7-(4-(trifluoromethyl)styryl)cyclohepta-1,3,5-triene (56.0 mg, 205  $\mu\text{mol}$ ), *N*-vinylphthalimide (71.0 mg, 410  $\mu\text{mol}$ ) and gold catalyst **A** (8.0 mg, 10.3  $\mu\text{mol}$ ). The crude residue was purified by flash chromatography (120 g  $\text{SiO}_2$ , eluent: 0 to 45%  $\text{Et}_2\text{O}$  in pentane).

**<sup>1</sup>H NMR** (300 MHz,  $\text{CDCl}_3$ )  $\delta$  7.84 (dd,  $J = 5.4, 3.1$  Hz, 2H), 7.72 (dd,  $J = 5.5, 3.0$  Hz, 2H), 7.48 – 7.43 (m, 2H), 7.30 – 7.25 (m, 3H), 6.51 (d,  $J = 15.8$  Hz, 1H), 5.98 (dd,  $J = 15.8, 8.0$  Hz, 1H), 3.06 (ddd,  $J = 7.8, 7.0, 4.9$  Hz, 1H), 2.17 (ddtd,  $J = 8.9, 7.9, 7.0, 0.8$  Hz, 1H), 1.79 (td,  $J = 6.8, 4.9$  Hz, 1H), 1.63 – 1.55 (m, 2H).

**<sup>13</sup>C NMR** (126 MHz,  $\text{CDCl}_3$ )  $\delta$  168.96, 140.62, 134.16, 131.57, 129.76, 129.33, 128.62, 128.11, 126.02, 125.35 (q,  $J = 3.8$  Hz), 123.29, 28.33, 20.23, 11.07.

**<sup>19</sup>F NMR** (376 MHz,  $\text{CDCl}_3$ )  $\delta$  -62.60.

**M.p.:** 117-119  $^\circ\text{C}$ .

**HRMS-APCI:** calculated for  $\text{C}_{20}\text{H}_{14}\text{F}_3\text{NNaO}_2$   $[\text{M}+\text{Na}]^+$ : 380.0869; found: 380.0864.

### *Cis*-2-(2-((*E*)-2-([1,1'-biphenyl]-4-yl)vinyl)cyclopropyl)isoindoline-1,3-dione (**6e**)

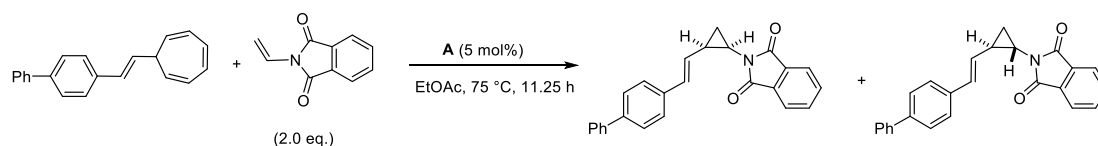

The *cis*-isomer (white solid, 38.5 mg, 50%) and the *trans*-isomer (white solid, 15.0 mg, 19%) were prepared according to the general procedure from (*E*)-4-(2-(cyclohepta-2,4,6-trien-1-yl)vinyl)-1,1'-biphenyl (57.2 mg, 212  $\mu$ mol), 2-vinylisoindoline-1,3-dione (73.3 mg, 423  $\mu$ mol) and gold catalyst **A** (8.2 mg, 11  $\mu$ mol). The crude was quenched with 0.5 mL Et<sub>3</sub>N and stirred at room temperature for 1h before being charged on silica gel and purified by flash chromatography (40 g SiO<sub>2</sub>, gradient: pentane to 50% Et<sub>2</sub>O, the *trans*-isomer elutes first).

Suitable crystals for X-ray diffraction of both isomers were obtained by slow evaporation of a solution in CDCl<sub>3</sub> in NMR tubes.

In addition to the structural evidence for both isomers by crystallography, their stereochemistry was independently confirmed by 1D NOESY experiments<sup>6</sup> (see spectra for full details).

*Cis*-isomer:

<sup>1</sup>H NMR (400 MHz, CDCl<sub>3</sub>)  $\delta$  7.87 – 7.78 (m, 2H), 7.73 – 7.64 (m, 2H), 7.55 – 7.50 (m, 2H), 7.46 – 7.37 (m, 4H), 7.33 – 7.28 (m, 1H), 7.27 – 7.24 (m, 2H), 6.50 (d, J = 15.8 Hz, 1H), 5.93 (dd, J = 15.8, 7.7 Hz, 1H), 3.03 (ddd, J = 7.7, 7.1, 4.9 Hz, 1H), 2.21 – 2.10 (m, 1H), 1.84 – 1.75 (m, 1H), 1.55 (ddd, J = 8.8, 7.9, 6.8 Hz, 1H).

<sup>13</sup>C NMR (101 MHz, CDCl<sub>3</sub>)  $\delta$  169.2, 140.8, 139.9, 136.4, 134.2, 131.8, 130.9, 128.8, 127.3, 127.2, 126.9, 126.5, 126.5, 123.4, 28.3, 20.4, 10.9.

**M.p.:** 155-156 °C.

**HRMS-ESI:** calculated for C<sub>25</sub>H<sub>19</sub>NNaO<sub>2</sub> [M+Na]<sup>+</sup>: 388.1308; found: 388.1303.

*Trans*-isomer:

<sup>1</sup>H NMR (400 MHz, CDCl<sub>3</sub>)  $\delta$  7.87 – 7.81 (m, 2H), 7.75 – 7.69 (m, 2H), 7.63 – 7.58 (m, 2H), 7.58 – 7.52 (m, 2H), 7.47 – 7.40 (m, 4H), 7.36 – 7.30 (m, 1H), 6.64 (d, J = 15.8 Hz, 1H), 6.07 (dd, J = 15.8, 7.9 Hz, 1H), 2.85 (ddd, J = 7.8, 4.4, 3.5 Hz, 1H), 2.26 – 2.16 (m, 1H), 1.60 (ddd, J = 9.5, 6.2, 4.6 Hz, 1H), 1.38 – 1.29 (m, 1H).

<sup>13</sup>C NMR (101 MHz, CDCl<sub>3</sub>)  $\delta$  168.7, 140.9, 140.0, 136.4, 134.2, 132.0, 130.0, 129.7, 128.9, 127.3 (two signals), 127.0, 126.5, 123.4, 29.6, 21.8, 13.6.

**M.p.:** 187-188 °C.

**HRMS-ESI:** calculated for C<sub>25</sub>H<sub>19</sub>NNaO<sub>2</sub> [M+Na]<sup>+</sup>: 388.1308; found: 388.1312.

### *Cis-(E)-2-(2-(3,5-dimethoxystyryl)cyclopropyl)isoindoline-1,3-dione (6f)*

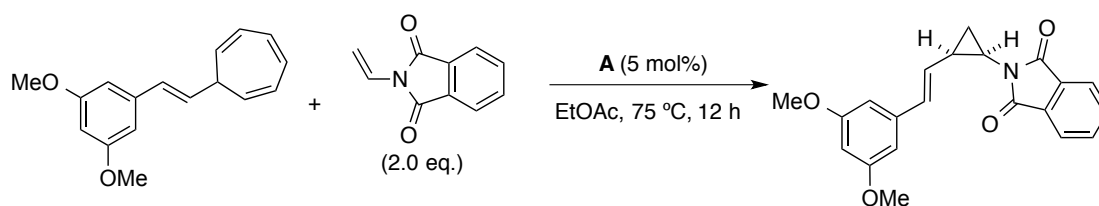

This compound (yellow solid, 52.5 mg, 60%, d.r. 6:1) was prepared according to the general procedure from (*E*)-7-(3,5-dimethoxystyryl)cyclohepta-1,3,5-triene (56.0 mg, 25  $\mu$ mol), *N*-vinylphthalimide (87.0 mg, 500  $\mu$ mol) and gold catalyst **A** (9.7 mg, 12.5  $\mu$ mol). The crude residue was purified by flash chromatography (120 g SiO<sub>2</sub>, eluent: 10 to 50% Et<sub>2</sub>O in pentane).

<sup>1</sup>H NMR (400 MHz, CDCl<sub>3</sub>)  $\delta$  7.82 (dd,  $J$  = 5.5, 3.0 Hz, 2H), 7.71 (dd,  $J$  = 5.5, 3.0 Hz, 2H), 6.40 (d,  $J$  = 15.7 Hz, 1H), 6.34 (d,  $J$  = 2.2 Hz, 2H), 6.28 (t,  $J$  = 2.3 Hz, 1H), 5.87 (dd,  $J$  = 15.7, 7.7 Hz, 1H), 3.72 (s, 6H), 3.05 – 2.99 (m, 1H), 2.20 – 2.07 (m, 1H), 1.78 (td,  $J$  = 6.8, 4.9 Hz, 1H), 1.59 – 1.49 (m, 1H).

<sup>13</sup>C NMR (101 MHz, CDCl<sub>3</sub>)  $\delta$  169.01, 160.70, 139.32, 134.05, 131.64, 131.18, 126.90, 123.24, 104.13, 99.23, 55.24, 28.17, 20.05, 10.76.

M.p.: 119-121 °C.

HRMS-APCI: calculated for C<sub>21</sub>H<sub>19</sub>NNaO<sub>4</sub> [M+Na]<sup>+</sup>: 372.1206; found: 372.1208.

### *Trans-2-(2-(2-methylprop-1-en-1-yl)cyclopropyl)isoindoline-1,3-dione (6g)*

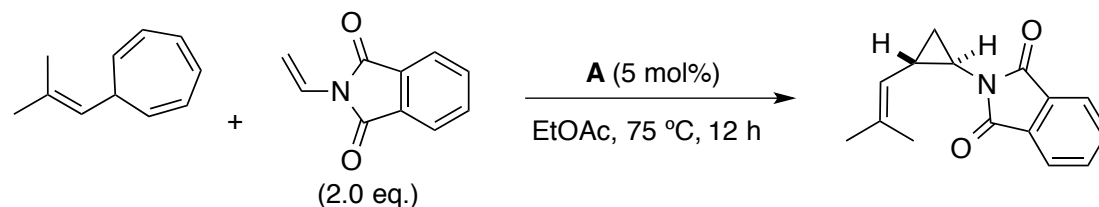

This compound (white solid, 35.3 mg, 59%, d.r. 4.7:1) was prepared according to the general procedure from 7-(2-methylprop-1-en-1-yl)cyclohepta-1,3,5-triene (37.0 mg, 250  $\mu$ mol), *N*-vinylphthalimide (87.0 mg, 500  $\mu$ mol) and gold catalyst **A** (9.7 mg, 12.5  $\mu$ mol). The crude residue was purified by flash chromatography (120 g SiO<sub>2</sub>, eluent: 5 to 10% Et<sub>2</sub>O in pentane).

The stereochemistry was confirmed by 1D NOESY experiments<sup>6</sup> (see spectral data for full details).

<sup>1</sup>H NMR (500 MHz, CDCl<sub>3</sub>)  $\delta$  7.86 – 7.82 (m, 2H), 7.74 – 7.71 (m, 2H), 4.75 (dt,  $J$  = 8.8, 1.3 Hz, 1H), 2.65 (ddd,  $J$  = 7.5, 4.1, 3.5 Hz, 1H), 2.12 (tdd,  $J$  = 9.4, 6.5, 3.4 Hz, 1H), 1.87 (d,  $J$  = 1.1 Hz, 3H), 1.77 (d,  $J$  = 1.1 Hz, 3H), 1.42 (ddd,  $J$  = 9.7, 5.9, 4.2 Hz, 1H), 1.06 (dt,  $J$  = 7.3, 6.2 Hz, 1H).

<sup>13</sup>C NMR (126 MHz, CDCl<sub>3</sub>)  $\delta$  168.64, 134.24, 133.96, 131.84, 124.13, 123.12, 28.64, 25.62, 18.33, 17.91, 13.94.



**HRMS-APCI:** calculated for  $C_{15}H_{15}NNaO_2 [M+Na]^+$ : 264.0995; found: 264.1004.

**Trans-2-(2-((tetrahydro-4H-pyran-4-ylidene)methyl)cyclopropyl)isoindoline-1,3-dione (6h)**

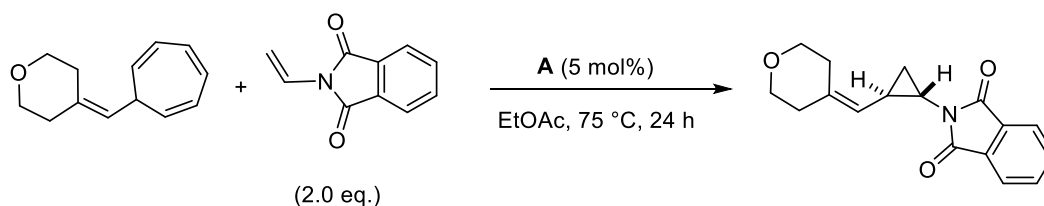

This compound (colorless oil, 51.8 mg, 73%, d.r. 1.2:1) was prepared according to the general procedure from 4-(cyclohepta-2,4,6-trien-1-ylmethylene)tetrahydro-2H-pyran (47.0 mg, 250  $\mu$ mol), *N*-vinylphthalimide (87.0 mg, 500  $\mu$ mol) and gold catalyst **A** (9.7 mg, 12.5  $\mu$ mol). The crude residue was purified by flash chromatography (120 g  $SiO_2$ , eluent: 10 to 60%  $Et_2O$  in pentane).

The stereochemistry was confirmed for the minor *cis*-isomer by 1D NOESY experiments<sup>6</sup> (see spectral data for full details).

*cis*-Isomer:  $^1H$  NMR (400 MHz,  $CDCl_3$ )  $\delta$  7.83 (td,  $J = 5.3, 3.0$  Hz, 2H), 7.72 (td,  $J = 5.4, 3.1$  Hz, 2H), 4.60 (d,  $J = 8.5$  Hz, 1H), 3.75 – 3.70 (m, 1H), 3.62 (ddd,  $J = 10.5, 6.0, 4.3$  Hz, 1H), 3.46 (ddd,  $J = 10.9, 7.6, 3.9$  Hz, 1H), 2.55 – 2.48 (m, 1H), 2.42 – 2.34 (m, 1H), 2.15 (td,  $J = 6.2, 3.1$  Hz, 1H), 2.04 (dd,  $J = 9.0, 3.9$  Hz, 1H), 2.02 – 1.95 (m, 1H), 1.56 (td,  $J = 6.5, 4.9$  Hz, 1H), 1.50 – 1.44 (m, 1H).

*trans*-Isomer:  $^1H$  NMR (400 MHz,  $CDCl_3$ )  $\delta$  7.83 (td,  $J = 5.3, 3.0$  Hz, 2H), 7.72 (td,  $J = 5.4, 3.1$  Hz, 2H), 4.80 (d,  $J = 8.5$  Hz, 1H), 3.73 – 3.67 (m, 3H), 2.65 (ddd,  $J = 7.5, 4.2, 3.4$  Hz, 1H), 2.63 – 2.56 (m, 1H), 2.50 – 2.43 (m, 1H), 2.28 – 2.23 (m, 2H), 2.12 – 2.07 (m, 1H), 1.46 – 1.41 (m, 1H), 1.09 (dt,  $J = 7.3, 6.3$  Hz, 1H).

*cis*-Isomer:  $^{13}C$  NMR (101 MHz,  $CDCl_3$ )  $\delta$  168.60, 138.22, 134.02, 131.77, 123.13, 119.34, 69.40, 68.55, 36.68, 30.41, 27.70, 15.14, 11.82.

*trans*-Isomer:  $^{13}C$  NMR (101 MHz,  $CDCl_3$ )  $\delta$  168.87, 136.78, 134.00, 131.77, 123.11, 122.83, 69.36, 68.75, 36.59, 30.24, 28.84, 16.95, 14.12.

**HRMS-APCI:** calculated for  $C_{17}H_{17}NNaO_3 [M+Na]^+$ : 306.1101; found: 306.1090.

## 7. Preparation of Julia-Kocienski reagents

### 5-((Cyclohepta-2,4,6-trien-1-ylmethyl)sulfonyl)-1-phenyl-1H-tetrazole (4a)

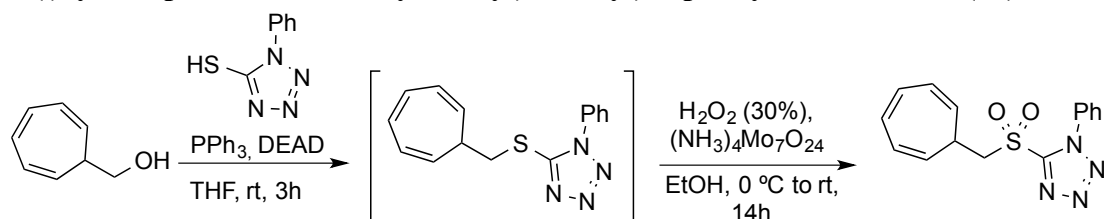

This compound was synthesized according to a modified literature procedure.<sup>7</sup>

To a solution of cyclohepta-2,4,6-trien-1-ylmethanol<sup>8</sup> (5.35 g, 43.8 mmol, 1.0 equiv), 1-Phenyl-1H-tetrazole-5-thiol (7.81 g, 43.8 mmol, 1.0 equiv), triphenylphosphine (11.49 g, 43.8 mmol, 1.0 equiv) in THF (175 mL, 0.25M) was added diethyl azodicarboxylate (40% toluene, 19.1 mL, 43.8 mmol, 1.0 equiv) dropwise and the reaction was left to stir for an additional 3 hours. Then, ethanol (230 mL, 0.15M) was added and the reaction was cooled to 0 °C, followed by the dropwise addition of a solution of ammonium molybdate tetrahydrate (4.31 g, 3.5 mmol, 0.15 equiv) in hydrogen peroxide (30%, 44 mL, 434 mmol, 12.5 equiv). The reaction was left to stir over night whilst warming to room temperature. Water (400 mL) was added and the mixture was extracted with DCM (400 mL) 3 times. The organic layers were combined, washed with brine (400 ml), dried over Na<sub>2</sub>SO<sub>4</sub> and concentrated to dryness. Flash chromatography (330 g SiO<sub>2</sub>, eluent: 1:1:8 Et<sub>2</sub>O:CH<sub>2</sub>Cl<sub>2</sub>:pentane) afforded 8.25 g (26.3 mmol, 60%) of a white solid.<sup>9</sup>

<sup>1</sup>H NMR (500 MHz, CDCl<sub>3</sub>) δ 7.70 – 7.61 (m, 5H), 6.72 – 6.70 (m, 2H), 6.30 (dt, *J* = 9.2, 2.9 Hz, 2H), 5.40 (dd, *J* = 9.1, 6.7 Hz, 2H), 3.97 (d, *J* = 7.2 Hz, 2H), 2.97 (p, *J* = 6.9 Hz, 1H).

<sup>13</sup>C NMR (126 MHz, CDCl<sub>3</sub>) δ 153.71, 132.99, 131.42, 129.66, 126.61, 125.18, 121.18, 57.02, 32.95.

**M.p.:** 98-99 °C.

**HRMS-APCI:** calculated for C<sub>15</sub>H<sub>14</sub>N<sub>4</sub>NaO<sub>2</sub>S [M+Na]<sup>+</sup>: 337.0730; found: 337.0725

### 1-(*Tert*-butyl)-5-((cyclohepta-2,4,6-trien-1-ylmethyl)sulfonyl)-1*H*-tetrazole (4b)

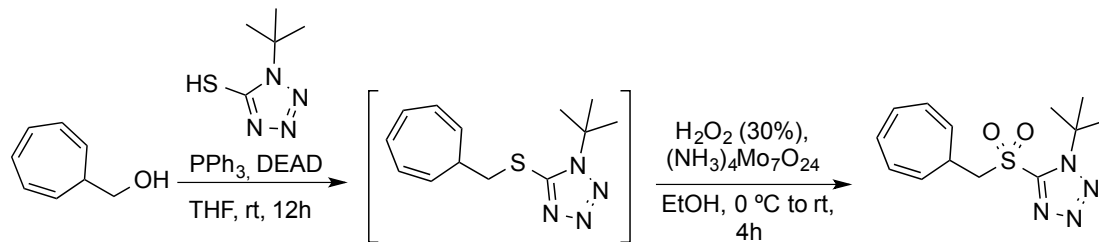

This compound was synthesized according to a modified literature procedure.<sup>7</sup>

To a solution of cyclohepta-2,4,6-trien-1-ylmethanol<sup>8</sup> (3.83 g, 31.4 mmol, 1.0 equiv), 1-*tert*-butyl-1*H*-tetrazole-5-thiol<sup>7,10</sup> (4.97 g, 31.4 mmol, 1.0 equiv), triphenylphosphine (8.24 g, 31.4 mmol, 1.0 equiv) in THF (125 mL, 0.25M) was added diethyl azodicarboxylate (40% toluene, 13.7 mL, 31.4 mmol, 1.0 equiv) dropwise and the reaction was left to stir for an additional 12 hours. Then, ethanol (150 mL, 0.15M) was added and the reaction was cooled to 0 °C, followed by the dropwise addition of a solution of ammonium molybdate tetrahydrate (3.28 g, 2.65 mmol, 0.0845 equiv) in hydrogen peroxide (30%, 33 mL, 320 mmol, 12.5 equiv). The reaction was left to stir for an additional 4 hours whilst warming to room temperature. Water (200 mL) was added and the mixture was extracted with DCM (200 mL) 3 times. The organic layers were combined, washed with brine (200 ml), dried over Na<sub>2</sub>SO<sub>4</sub> and concentrated to dryness. Flash chromatography (330 g SiO<sub>2</sub>, eluent: 1:1:8 Et<sub>2</sub>O:CH<sub>2</sub>Cl<sub>2</sub>:pentane) afforded 4.28 g (14.5 mmol, 46%) of a light yellow solid.<sup>11</sup>

<sup>1</sup>H NMR (400 MHz, CDCl<sub>3</sub>) δ 6.75 – 6.71 (m, 2H), 6.32 (dt, *J* = 9.4, 3.3 Hz, 2H), 5.45 (dd, *J* = 9.0, 6.5 Hz, 2H), 4.12 (d, *J* = 7.1 Hz, 2H), 2.92 (p, *J* = 6.9 Hz, 1H), 1.86 (s, 9H).

<sup>13</sup>C NMR (101 MHz, CDCl<sub>3</sub>) δ 154.34, 131.41, 126.32, 121.56, 65.53, 57.98, 33.15, 29.68.

**M.p.:** 45-51 °C.

**HRMS-APCI:** calculated for C<sub>13</sub>H<sub>18</sub>N<sub>4</sub>NaO<sub>2</sub>S [M+Na]<sup>+</sup>: 317.1043; found: 317.1042

## 8. Miscellaneous

### Phthalimide deprotection and functionalization of amine.

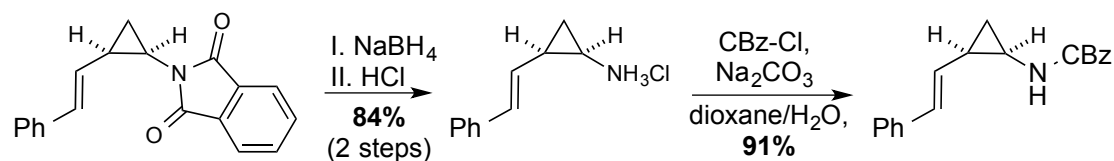

**(E)-2-Styrylcyclopropan-1-aminium chloride (7)** was synthesized according to a modified literature procedure.<sup>12</sup>

(E)-2-(2-styrylcyclopropyl)isoindoline-1,3-dione **6a** (1.16g, 4.0 mmol, 1.0 equiv) is dissolved in dichloromethane (6 mL, 0.66M) and 2-propanol (36, 0.11M) and water (6 mL, 0.66M) is added, followed by sodium borohydride (755 mg, 20 mmol, 5.0 equiv) and the reaction is left to stir for 4 hours (checked by TLC). Ethyl acetate and silica were added carefully and the mixture was poured on a silica plug and washed with Et<sub>2</sub>O. The solvents were evaporated on the rotovap and the crude white solid could directly be used in the next step.

The solids were dissolved in dioxane (13 mL, 0.3M) and cooled to 0 °C before dry hydrochloric acid in dioxane (13 mL, 4M) was added and the reaction was left to stir over night, warming to room temperature. The white solid was collected on a filter and the orange byproduct was washed out with Et<sub>2</sub>O. Drying under high vacuum yielded 656 mg (3.35 mmol, 84%) of a white powder.

<sup>1</sup>H NMR (500 MHz, Methanol-d<sub>4</sub>) δ 7.43 – 7.40 (m, 2H), 7.33 – 7.28 (m, 2H), 7.25 – 7.20 (m, 1H), 6.75 (d, J = 15.7 Hz, 1H), 6.08 (dd, J = 15.7, 8.6 Hz, 1H), 2.87 (td, J = 7.6, 4.5 Hz, 1H), 2.07 (dt, J = 16.3, 8.6 Hz, 1H), 1.34 (ddd, J = 9.2, 7.6, 6.6 Hz, 1H), 1.02 (td, J = 6.7, 4.5 Hz, 1H).

<sup>13</sup>C NMR (126 MHz, MeOD) δ 136.86, 134.30, 128.30, 127.34, 125.80, 123.25, 28.11, 18.37, 10.42.

**M.p.:** 167 °C (decomposition)

**HRMS-APCI:** calculated for C<sub>11</sub>H<sub>14</sub>N [M-Cl]<sup>+</sup>: 160.1121; found: 160.1128

### Benzyl (E)-2-styrylcyclopropylcarbamate (8)

(E)-2-Styrylcyclopropan-1-aminium chloride **7** (294 mg, 1.5 mmol, 1.0 equiv) was dissolved in a mixture of dioxane (12 mL) and water (12 mL) and cooled to 0 °C. Na<sub>2</sub>CO<sub>3</sub> (795 mg, 7.5 mmol, 5.0 equiv) was added, quickly followed by benzyl chloroformate. (236 μL, 1.65 mmol, 1.1 equiv) and the reaction was left to stir for 1 hour before being warmed to room temperature. The mixture was extracted with dichloromethane (10 mL, x3) and washed with water (20 mL) and brine (20 mL). Flash chromatography (silica, eluent: 30% Et<sub>2</sub>O in pentane) yielded 402 mg (1.37 mmol, 91%) of a white solid.

<sup>1</sup>H NMR (500 MHz, CDCl<sub>3</sub>) δ 7.42 – 7.39 (m, 1H), 7.37 – 7.29 (m, 8H), 7.26 – 7.21 (m, 1H), 6.58 (d, J = 15.9 Hz, 2H), 5.95 (dd, J = 15.8, 8.5 Hz, 1H), 5.19 – 5.13 (m, 1H), 5.02 (d, J =

75.8 Hz, 1H), 4.73 (d,  $J = 5.9$  Hz, 1H), 3.00 – 2.91 (bm, 1H), 1.91 – 1.83 (bm, 1H), 1.33 – 1.25 (bm, 1H), 0.81 (bs, 1H).

$^{13}\text{C}$  NMR (126 MHz,  $\text{CDCl}_3$ )  $\delta$  137.27 (C=O), 136.42 (C=O), 131.68, 128.57, 128.53, 128.50, 128.12 (broad), 127.66, 127.09, 126.99, 126.96 (broad), 125.90, 66.81 (benzylic), 65.41 (benzylic), 29.72, 20.70, 14.29.

**M.p.:** 114-116 °C

**HRMS-APCI:** calculated for  $\text{C}_{19}\text{H}_{19}\text{NNaO}_2$   $[\text{M}+\text{Na}]^+$ : 316.1308; found: 316.1312

### Oxidative cleavage to aldehyde and esterification.

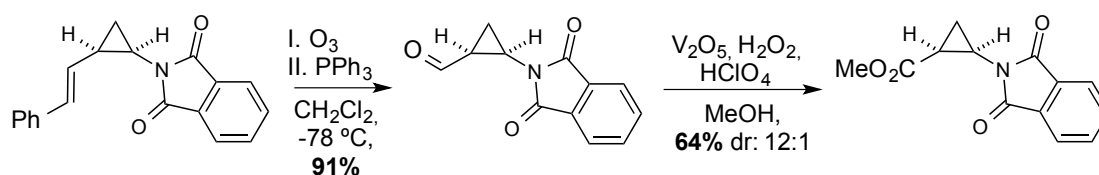

### *Cis*-2-(1,3-dioxoisoindolin-2-yl)cyclopropane-1-carbaldehyde (**9a**)

(*E*)-2-(2-styrylcyclopropyl)isoindoline-1,3-dione **6a** (723 mg, 2.5 mmol) was dissolved in dichloromethane (100 mL, 0.025M) and cooled to  $-78^\circ\text{C}$ . Ozone was bubbled through the solution until a blue color appeared. Oxygen and then nitrogen gas was bubbled through the solution followed by the addition of triphenylphosphine (656 mg, 2.5 mmol). The reaction was stirred at room temperature for 2 hours before it was concentrated. Flash chromatography (silica, eluent: 50 to 100%  $\text{Et}_2\text{O}$  in pentane) yielded 490 mg (2.275 mmol, 91%) of a white solid.

$^1\text{H}$  NMR (500 MHz,  $\text{CDCl}_3$ )  $\delta$  9.67 (d,  $J = 2.7$  Hz, 1H), 7.85 (dd,  $J = 5.5, 3.0$  Hz, 2H), 7.74 (dd,  $J = 5.5, 3.0$  Hz, 2H), 3.14 (td,  $J = 7.2, 5.8$  Hz, 1H), 2.58 (dtd,  $J = 8.5, 6.9, 2.7$  Hz, 1H), 2.16 (q,  $J = 6.3$  Hz, 1H), 1.71 (ddd,  $J = 8.3, 7.4, 6.3$  Hz, 1H).

$^{13}\text{C}$  NMR (126 MHz,  $\text{CDCl}_3$ )  $\delta$  196.56, 168.47, 134.26, 131.41, 123.44, 29.69, 26.40, 12.82.

**M.p.:** 107 °C

**HRMS-APCI:** calculated for  $\text{C}_{12}\text{H}_9\text{NNaO}_3$   $[\text{M}+\text{Na}]^+$ : 238.0475; found: 238.0477

### Methyl 2-(1,3-dioxoisoindolin-2-yl)cyclopropane-1-carboxylate (**10**)

The oxidative esterification to **10** based on a literature procedure.<sup>13</sup>

2-(1,3-dioxoisoindolin-2-yl)cyclopropane-1-carbaldehyde **9a** (43 mg, 0.2 mmol, 1.0 equiv) was dissolved in methanol (4 mL, 0.05M). Meanwhile, vanadium(V)oxide (36 mg, 0.2 mmol, 1.0 equiv) was dissolved in a  $\text{H}_2\text{O}_2$  solution (15% 1.5 mL) at  $0^\circ\text{C}$ . The solution of aldehyde **9a** is cooled to  $0^\circ\text{C}$  and once the vanadium solution turns deep red, perchloric acid (1.44  $\mu\text{L}$ , 70%, 0.01 mmol, 0.05 equiv) is added to it. The oxidant mixture is carefully added to the methanolic solution and left to stir for 3 hours, whilst slowly warming. The reaction was quenched by adding a saturated sodium thiosulfate solution at  $0^\circ\text{C}$  and stirring was continued for 1 hour. The mixture was extracted with ethyl acetate (25 mL) and washed with water (20

mL, x2) and brine (20 mL). Concentration followed by flash chromatography (silica 24 g, eluent: 20 to 90% Et<sub>2</sub>O in pentane over 1 hour, fractions analyzed by GC-FID)<sup>14</sup> afforded 31.1 mg (0.127 mmol, 64%) of a colorless oil.

<sup>1</sup>H NMR (300 MHz, CDCl<sub>3</sub>) δ 7.86 – 7.81 (m, 2H), 7.72 (dd, J = 5.5, 3.0 Hz, 2H), 3.62 (s, 3H), 3.04 (td, J = 7.4, 5.8 Hz, 1H), 2.23 (dt, J = 8.6, 6.8 Hz, 1H), 1.96 (q, J = 6.3 Hz, 1H), 1.66 (ddd, J = 8.7, 7.7, 6.3 Hz, 1H).

<sup>13</sup>C NMR (75 MHz, CDCl<sub>3</sub>) δ 171.01, 168.56, 134.07, 131.62, 123.34, 52.13, 27.53, 18.60, 13.03.

HRMS-APCI: calculated for C<sub>13</sub>H<sub>11</sub>NNaO<sub>4</sub> [M+Na]<sup>+</sup>: 268.0580; found: 268.0574

### Epimerization of aldehyde.

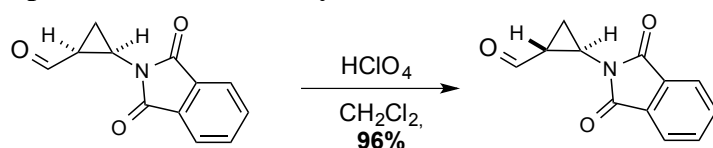

### *Trans*-2-(1,3-dioxisoindolin-2-yl)cyclopropane-1-carbaldehyde (**9b**)

2-(1,3-dioxisoindolin-2-yl)cyclopropane-1-carbaldehyde **9a** (43 mg, 0.2 mmol, 1.0 equiv) was dissolved in dichloromethane (1 mL) and perchloric acid (2.9 μL, 70%, 0.02 mmol, 0.1 equiv) was added. The reaction was stirred for 2 hours before it was extracted with dichloromethane (5 mL) and wash with water (5 mL, 3x) and brine (5 mL), affording 41 mg (0.192 mmol, 96%) of a yellowish solid.

<sup>1</sup>H NMR (400 MHz, CDCl<sub>3</sub>) δ 9.66 (d, J = 2.7 Hz, 1H), 7.84 (dd, J = 5.5, 3.1 Hz, 2H), 7.74 (dd, J = 5.5, 3.1 Hz, 2H), 3.13 (td, J = 7.2, 5.8 Hz, 1H), 2.58 (dtd, J = 8.4, 6.9, 2.7 Hz, 1H), 2.15 (q, J = 6.3 Hz, 1H), 1.70 (ddd, J = 8.4, 7.4, 6.3 Hz, 1H).

<sup>13</sup>C NMR (101 MHz, CDCl<sub>3</sub>) δ 196.57, 168.47, 134.26, 131.40, 123.45, 29.69, 26.40, 12.82.

M.p.: 98 °C

### Preparation of styrenes.

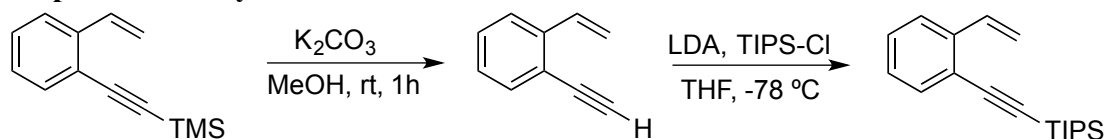

### 1-Ethynyl-2-vinylbenzene

This compound was synthesized using a modified literature procedure<sup>15</sup>: Anhydrous potassium carbonate (622 mg, 4.5 mmol, 1.5 equiv) was added to a solution of trimethyl((2-vinylphenyl)ethynyl)silane<sup>16</sup> (600 mg, 3.0 mmol, 1.0 equiv) in methanol (4.5 mL, 0.667M) and the suspension was stirred for 1 hour at room temperature. The mixture was extracted with pentane, washed with brine and used directly in the next step.

The crude data was consistent with the literature<sup>15</sup>.

### Triisopropyl((2-vinylphenyl)ethynyl)silane (11)

1-ethynyl-2-vinylbenzene (3.0 mmol, 1.0 equiv) was dissolved in dry THF (15 mL, 0.2M) and cooled to  $-78\text{ }^\circ\text{C}$ , followed by the addition of lithium diisopropylamine (0.5M THF, 8.0 mL, 4.0 mmol, 1.2 equiv) over 10 minutes, and finally the addition of triisopropylsilyl chloride (963  $\mu\text{L}$ , 4.5 mmol, 1.5 equiv). The reaction was slowly warmed to room temperature, after which it was quenched with water, extracted with  $\text{Et}_2\text{O}$ , washed with brine and dried over  $\text{Na}_2\text{SO}_4$ . Flash chromatography (80 g,  $\text{SiO}_2$ , eluent: pentane) afforded 617 mg (2.17 mmol, 72%) of a colorless oil.

**$^1\text{H}$  NMR** (400 MHz,  $\text{CDCl}_3$ )  $\delta$  7.61 – 7.57 (m, 1H), 7.51 – 7.48 (m, 1H), 7.34 – 7.25 (m, 2H), 7.21 (td,  $J = 7.5, 1.2$  Hz, 1H), 5.83 (dd,  $J = 17.7, 1.1$  Hz, 1H), 5.36 (dd,  $J = 11.0, 1.0$  Hz, 1H), 1.17 (s, 18H).

**$^{13}\text{C}$  NMR** (126 MHz,  $\text{CDCl}_3$ )  $\delta$  139.34, 135.03, 133.05, 128.42, 127.31, 124.46, 122.27, 115.45, 105.14, 95.56, 18.70, 11.34.

**HRMS-APCI**: calculated for  $\text{C}_{19}\text{H}_{29}\text{Si}$   $[\text{M}+\text{H}]^+$ : 285.2033; found: 285.2046

### *Cis-(E)*-triisopropyl((2-(2-styrylcyclopropyl)phenyl)ethynyl)silane (**12a**)

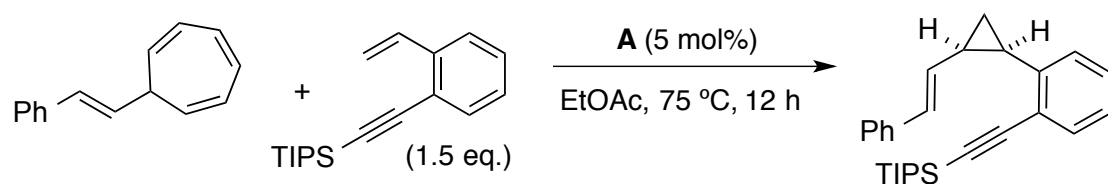

This compound (colorless oil, 64.5 mg, 64%, d.r. >20:1) was prepared according to the general procedure from (*E*)-7-styrylcyclohepta-1,3,5-triene (49.0 mg, 25  $\mu$ mol), triisopropyl((2-vinylphenyl)ethynyl)silane (107 mg, 375  $\mu$ mol) and gold catalyst **A** (9.7 mg, 12.5  $\mu$ mol). The crude residue was purified by flash chromatography (40 g SiO<sub>2</sub>, eluent: pentane).

<sup>1</sup>H NMR (300 MHz, CDCl<sub>3</sub>)  $\delta$  7.47 (dd,  $J$  = 7.4, 0.9 Hz, 1H), 7.32 – 7.21 (m, 1H), 7.18 (dt,  $J$  = 5.0, 3.6 Hz, 4H), 7.14 – 7.08 (m, 3H), 6.46 (d,  $J$  = 15.7 Hz, 1H), 5.47 (dd,  $J$  = 15.7, 9.2 Hz, 1H), 2.70 (q,  $J$  = 8.4 Hz, 1H), 2.13 (qd,  $J$  = 8.8, 5.5 Hz, 1H), 1.47 – 1.37 (m, 1H), 1.30 – 1.21 (m, 1H), 1.16 (s, 18H).

<sup>13</sup>C NMR (101 MHz, CDCl<sub>3</sub>)  $\delta$  140.96, 137.82, 132.83, 129.98, 129.78, 128.27, 127.91, 127.64, 126.43, 125.84, 125.65, 125.40, 105.82, 94.70, 23.57, 23.10, 18.74, 12.37, 11.39.

HRMS-APCI: calculated for C<sub>28</sub>H<sub>37</sub>Si [M+H]<sup>+</sup>: 401.2659; found: 401.2665.

### A gold(I)-catalyzed 1,7-enyne cyclization

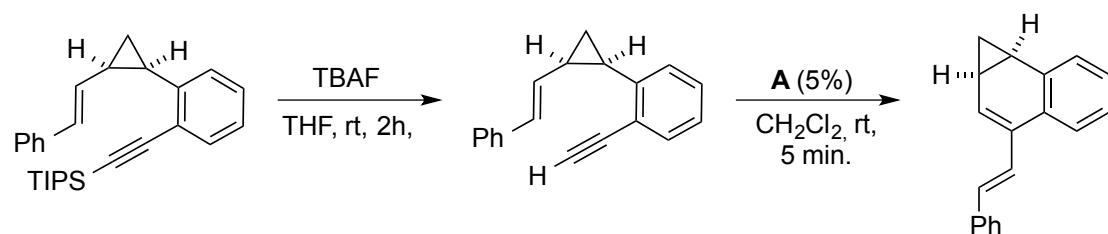

### (*E*)-1-ethynyl-2-(2-styrylcyclopropyl)benzene (**12b**)

To a solution of **12a** (46 mg, 0.115 mmol, 1.0 equiv) in THF (1.7 mL, 0.07M) was added a solution of tetrabutylammonium fluoride (1.0M THF, 575  $\mu$ L, 5.0 equiv) and the reaction was stirred for 2 hours. Extracting with Et<sub>2</sub>O, drying with Na<sub>2</sub>SO<sub>4</sub> and filtration of a silica plug yielded the pure compound in 27.7 mg (0.113 mmol, 99%) as a colorless oil

<sup>1</sup>H NMR (500 MHz, CDCl<sub>3</sub>)  $\delta$  7.50 (dd,  $J$  = 7.7, 1.5 Hz, 1H), 7.33 – 7.29 (m, 1H), 7.24 – 7.17 (m, 4H), 7.15 – 7.11 (m, 3H), 6.51 (d,  $J$  = 15.7 Hz, 1H), 5.52 (dd,  $J$  = 15.7, 9.2 Hz, 1H), 3.31 (s, 1H), 2.74 – 2.66 (m, 1H), 2.18 (qd,  $J$  = 8.7, 5.6 Hz, 1H), 1.43 (td,  $J$  = 8.3, 5.4 Hz, 1H), 1.24 (dt,  $J$  = 6.4, 5.5 Hz, 1H).

<sup>13</sup>C NMR (126 MHz, CDCl<sub>3</sub>)  $\delta$  141.39, 137.78, 132.86, 129.96, 129.79, 128.37, 128.33, 127.72, 126.54, 125.91, 125.66, 123.95, 82.60, 81.15, 23.16, 22.93, 17.71, 12.51, 12.30.

HRMS-APCI: calculated for C<sub>19</sub>H<sub>17</sub> [M+H]<sup>+</sup>: 245.1325; found: 245.1334



### (*E*)-3-styryl-1a,7b-dihydro-1*H*-cyclopropa[*a*]naphthalene (13)

Catalyst A (3 mg, 0.004 mmol, 5 mol%) was added to a stirred solution of (*E*)-1-ethynyl-2-(2-styrylcyclopropyl)benzene (19.3 mg, 0.079 mmol, 1.0 equiv) in CH<sub>2</sub>Cl<sub>2</sub> (1.25 mL, 0.0625M). After the disappearance of the pink color, a drop of triethylamine was added and the solution was filtered over a silica plug, providing the pure compound in 19.0 mg (0.078 mmol, 98%) as a colorless oil.

<sup>1</sup>H NMR (500 MHz, CDCl<sub>3</sub>) δ 7.54 – 7.49 (m, 3H), 7.45 (dd, *J* = 7.3, 1.6 Hz, 1H), 7.38 (t, *J* = 7.7 Hz, 2H), 7.30 – 7.20 (m, 4H), 6.85 (d, *J* = 15.7 Hz, 1H), 6.55 (d, *J* = 5.5 Hz, 1H), 2.54 (td, *J* = 8.3, 5.1 Hz, 1H), 2.13 (tt, *J* = 7.9, 4.0 Hz, 1H), 1.62 (td, *J* = 8.8, 3.6 Hz, 1H), -0.12 – -0.16 (m, 1H).

<sup>13</sup>C NMR (126 MHz, CDCl<sub>3</sub>) δ 137.75, 136.04, 131.14, 130.31, 130.11, 128.63, 128.39, 127.39, 127.27 (2CH), 127.05, 126.47, 125.61, 124.17, 21.23, 17.84, 10.57.

HRMS-APCI: calculated for C<sub>19</sub>H<sub>17</sub> [M+H]<sup>+</sup>: 245.1325; found: 245.1336

### Cross metathesis of vinyl cyclopropanes

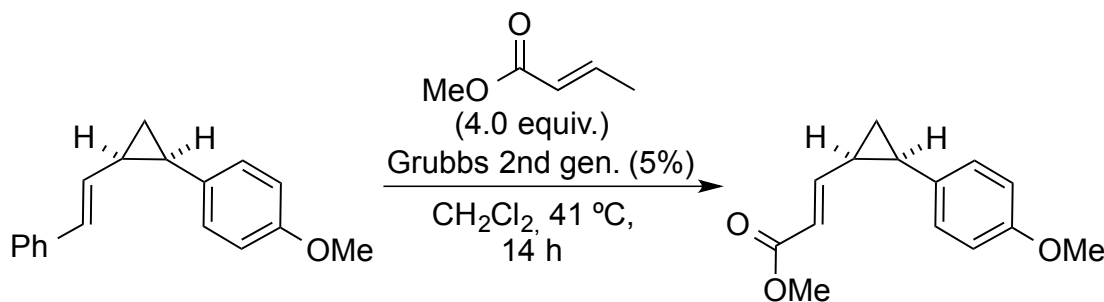

### Methyl (*E*)-3-(2-(4-methoxyphenyl)cyclopropyl)acrylate (14)

This method is based on a literature procedure.<sup>17</sup>

Grubbs catalyst 2<sup>nd</sup> generation (21 mg, 0.025 mmol, 5 mol%) and **3g** (125 mg, 0.5 mmol, 1.0 equiv) were mixed in a 5 mL microwave vial. After capping, the atmosphere was evacuated and backfilled with argon three times. CH<sub>2</sub>Cl<sub>2</sub> (3.3 mL, 0.155M) and methyl crotonate (212 μL 2.0 mmol, 4.0 equiv) were added sequentially and the reaction mixture was stirred for 14h at 41 °C. The mixture was cooled to room temperature and adsorbed directly on florisil. Flash chromatography (24 g SiO<sub>2</sub>, eluent: 5 to 20% Et<sub>2</sub>O in pentane) yielded 83 mg (0.36 mmol, 72%, dr: 15:1) of a grey oil.

<sup>1</sup>H NMR (500 MHz, CDCl<sub>3</sub>) δ 7.16 (d, *J* = 8.3 Hz, 2H), 6.87 – 6.83 (m, 2H), 6.27 (dd, *J* = 15.4, 10.6 Hz, 1H), 5.93 (d, *J* = 15.4 Hz, 1H), 3.82 (s, 3H), 3.65 (s, 3H), 2.55 (q, *J* = 8.3 Hz, 1H), 2.01 – 1.93 (m, 1H), 1.45 (td, *J* = 8.6, 5.2 Hz, 1H), 1.23 (dt, *J* = 6.7, 5.2 Hz, 1H).

<sup>13</sup>C NMR (126 MHz, CDCl<sub>3</sub>) δ 166.70, 158.28, 150.63, 130.11, 129.38, 119.49, 113.81, 55.25, 51.22, 24.84, 22.23, 13.84.

HRMS-APCI: calculated for C<sub>14</sub>H<sub>16</sub>NaO<sub>3</sub> [M+Na]<sup>+</sup>: 255.0992; found: 255.0980

### 7-(2,4-Dimethoxyphenyl)cyclohepta-1,3,5-triene (**S1**)

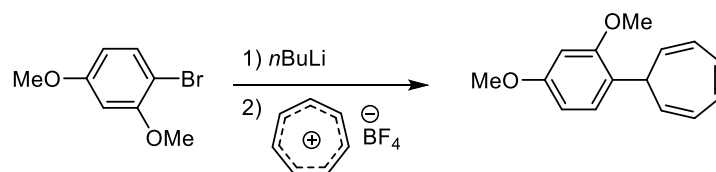

To a solution of 1-bromo-2,4-dimethoxybenzene (6.033 g, 27.8 mmol, 1.05 equiv) in dry Et<sub>2</sub>O (132 mL) at -78 °C was added dropwise *n*-BuLi (15.571 mL, 1.87 M in hexanes, 29.1 mmol, 1.10 equiv) under argon. The mixture was stirred for 30 min at -78 °C, and then tropylium tetrafluoroborate (4.710 g, 26.5 mmol, 1.00 equiv) was added in one portion. The cooling bath was removed and the reaction was allowed to warm up to 23 °C and stirred for 2.5 h. The reaction was quenched by addition of brine. The aqueous phase was extracted with Et<sub>2</sub>O, the combined organic extracts were dried over MgSO<sub>4</sub>, and the solvent was evaporated *in vacuo*. The crude residue was purified by flash chromatography (120 g SiO<sub>2</sub>, eluent: gradient from CyHex to 10% EtOAc) affording 4.550 g (4.92 mmol, 71%) of a yellow oil. Dimethoxybenzene was removed from the product via Kugelrohr distillation (80 °C at 2.4 x 10<sup>-1</sup> mbar) affording 4.040 g (17.7 mmol, 67%) of **S1** as a yellow oil. The product contains 6% of an impurity, presumably a regioisomer of the cycloheptatriene.

<sup>1</sup>H NMR (400 MHz, CDCl<sub>3</sub>) δ 7.31 (d, J = 8.0 Hz, 1H), 6.83 – 6.75 (m, 2H), 6.63 – 6.55 (m, 2H), 6.34 – 6.27 (m, 2H), 5.50 (dd, J = 8.9, 5.6 Hz, 2H), 3.89 (s, 3H), 3.84 (s, 3H), 3.18 – 3.11 (m, 1H).

<sup>13</sup>C NMR (101 MHz, CDCl<sub>3</sub>) δ 159.8, 158.4, 130.9, 129.3, 127.6, 124.4, 124.1, 104.4, 99.0, 55.4 (2 signals), 40.2.

HRMS-ESI: calculated for C<sub>15</sub>H<sub>17</sub>O<sub>2</sub> [M+H]<sup>+</sup>: 229.1223; found: 229.1228.

### *Trans*-4-((2-(2,4-dimethoxyphenyl)cyclopropyl)phenyl) acetate (**S2**)

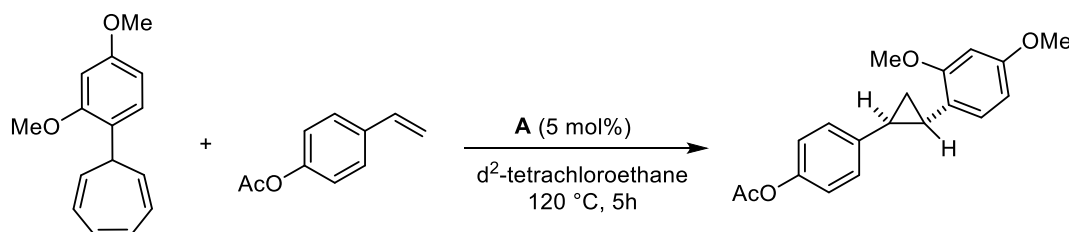

A solution of the cycloheptatriene **S1** (45.9 mg, 201 μmol, 2.0 equiv), 4-vinylphenyl acetate (16.3 mg, 101 μmol, 1.0 equiv), diphenylmethane (17 μL, 101 μmol, 1.0 equiv) as internal standard (1.0 equiv) and gold catalyst **A** (3.9 mg, 5 μmol, 0.05 equiv) in d<sup>2</sup>-1,1,2,2-tetrachloroethane (0.6 mL) was added to Young-NMR tube. The atmosphere was exchanged by three vacuum/Argon cycles and the tube was sealed. The NMR-tube was placed in a NMR machine, preheated to 120 °C. The reaction was monitored by <sup>1</sup>H NMR every 10 min for 5 h. The reaction mixture was cooled to room temperature and the solvent was removed *in vacuo*. The crude residue was purified by column chromatography (4 g SiO<sub>2</sub>, eluent: gradient from

CyHex to 20% EtOAc) affording **S2** (28.9 mg, 92.59  $\mu\text{mol}$ , 92%, d.r. 12:1) as a pale yellow oil.

The stereochemistry was confirmed by 1D NOESY experiments<sup>6</sup> (see spectral data for full details).

<sup>1</sup>H NMR (400 MHz, CDCl<sub>3</sub>)  $\delta$  7.24 – 7.17 (m, 2H), 7.03 – 6.97 (m, 2H), 6.89 (d, J = 8.1 Hz, 1H), 6.49 – 6.41 (m, 2H), 3.82 (s, 3H), 3.80 (s, 3H), 2.34 – 2.28 (m, 4H), 2.08 – 2.00 (m, 1H), 1.37 – 1.32 (m, 1H), 1.31 – 1.26 (m, 1H).

<sup>13</sup>C NMR (101 MHz, CDCl<sub>3</sub>)  $\delta$  169.8, 159.3, 159.2, 148.7, 140.9, 127.3, 126.1, 123.2, 121.4, 104.0, 98.6, 55.6, 55.5, 25.7, 21.6, 21.3, 16.4.

HRMS-ESI: calculated for C<sub>19</sub>H<sub>21</sub>O<sub>4</sub> [M+H]<sup>+</sup>: 313.1434; found: 313.1446.

### Reaction progress monitored by <sup>1</sup>H NMR:

The reaction was monitored by <sup>1</sup>H NMR, integrations were normalized against diphenylmethane (CH<sub>2</sub> at 4.07 ppm). For **S1** the CH at 3.22 ppm, for *cis*-**S2** the CH<sub>3</sub>-C(O) at 2.25 ppm and *trans*-**S2** the CH at 2.39 ppm were integrated. The given concentration in Table S1 can be considered as correct within the experimental error.

The cyclopropanation reaction proceeds very fast at 120 °C. Already after 10 min it is complete, full conversion of styrene and 85% conversion of **S1** is reached (Figure S1). *In situ* formed *cis*-**S2** is converted, most likely, into *trans*-**S2**. The d.r. is changing during the course of the reaction from 3.7:1 (10 min) to 10.8:1 (45 min).

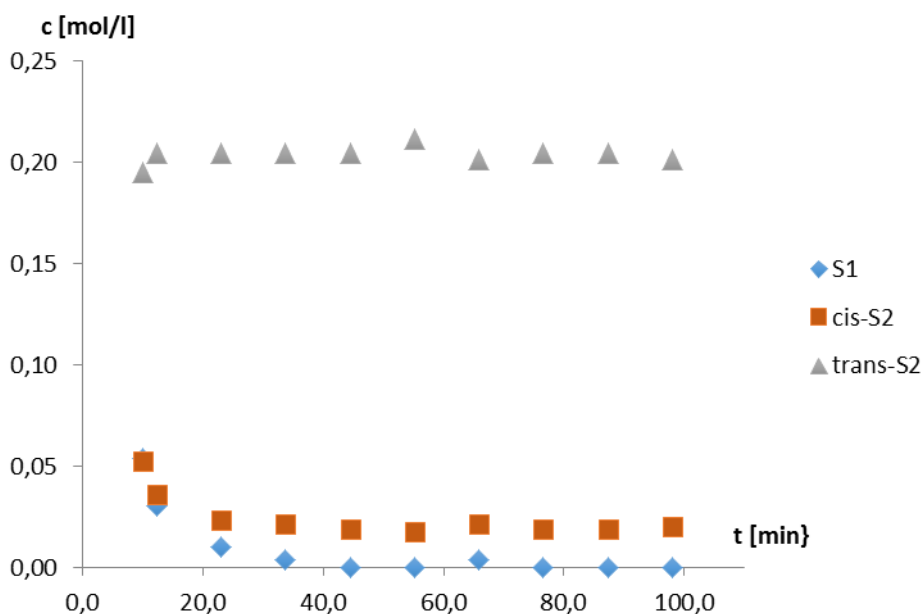

Figure S1. Reaction profile of the cyclopropanation of 4-vinylphenyl acetate using **S1**

**Table S1. Measured concentration (<sup>1</sup>H NMR) during the cyclopropanation of 4-vinylphenyl acetate using S1**

| Time [min] | c(S1) [mol/l] | c( <i>cis</i> -S2) [mol/l] | c( <i>trans</i> -S2) [mol/l] |
|------------|---------------|----------------------------|------------------------------|
| 10         | 0,05          | 0,05                       | 0,19                         |
| 12         | 0,03          | 0,04                       | 0,20                         |
| 23         | 0,01          | 0,02                       | 0,20                         |
| 34         | 0,00          | 0,02                       | 0,20                         |
| 45         | 0,00          | 0,02                       | 0,20                         |
| 55         | 0,00          | 0,02                       | 0,21                         |
| 66         | 0,00          | 0,02                       | 0,20                         |
| 77         | 0,00          | 0,02                       | 0,20                         |
| 87         | 0,00          | 0,02                       | 0,20                         |
| 98         | 0,00          | 0,02                       | 0,20                         |
| 109        | 0,00          | 0,02                       | 0,22                         |
| 119        | 0,00          | 0,02                       | 0,19                         |
| 130        | 0,00          | 0,02                       | 0,20                         |
| 141        | 0,00          | 0,02                       | 0,20                         |
| 152        | 0,00          | 0,02                       | 0,19                         |
| 162        | 0,00          | 0,02                       | 0,19                         |
| 173        | 0,00          | 0,02                       | 0,19                         |

## 9. Kinetic experiments for the epimerization of alkenylcyclopropanes

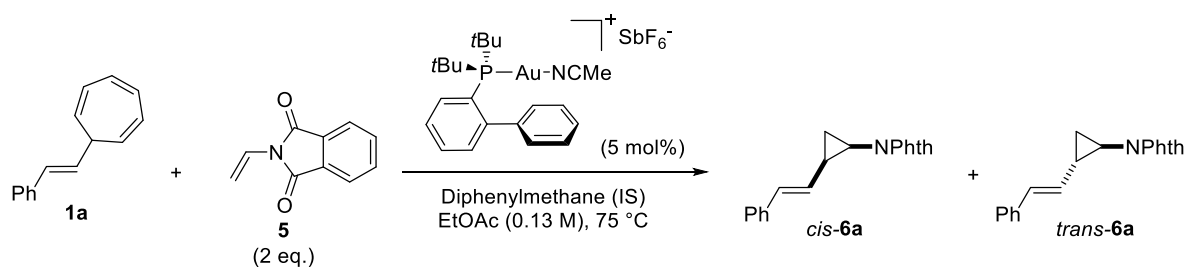

### Initial rate studies for the gold(I)-catalyzed retro-Buchner reaction of **1a**.

Cycloheptatriene **1a** (100.0 mg, 515  $\mu\text{mol}$ , 1 equiv), *N*-vinyl phthalimide **5** (178.0 mg, 1.03 mmol, 2 equiv), gold catalyst **A** (19.9 mg, 26  $\mu\text{mol}$ , 5 mol%) and diphenylmethane (86  $\mu\text{L}$ , 515  $\mu\text{mol}$ , 1 equiv) were added to a small round-bottom flask and the atmosphere was exchanged for argon with three vacuum/Argon cycles before adding EtOAc (4 mL). The round-bottom flask was placed in a preheated oil bath and stirred at 75 °C.

Aliquots of the reaction mixture were taken, filtered in a pipette over silica gel with EtOAc and were then concentrated to dryness.  $^1\text{H}$  NMR spectra were recorded (8 scans,  $\text{CDCl}_3$ , 400 MHz) and the concentration of the products quantified by integration against the internal standard diphenylmethane.

The reaction profile shows a fast consumption of cycloheptatrienes **1a** going along with a fast formation of **cis-6a**. After complete conversion of **1a**, the amount **cis-6a** is slowly decreasing and at the same time **trans-6a** is forming.

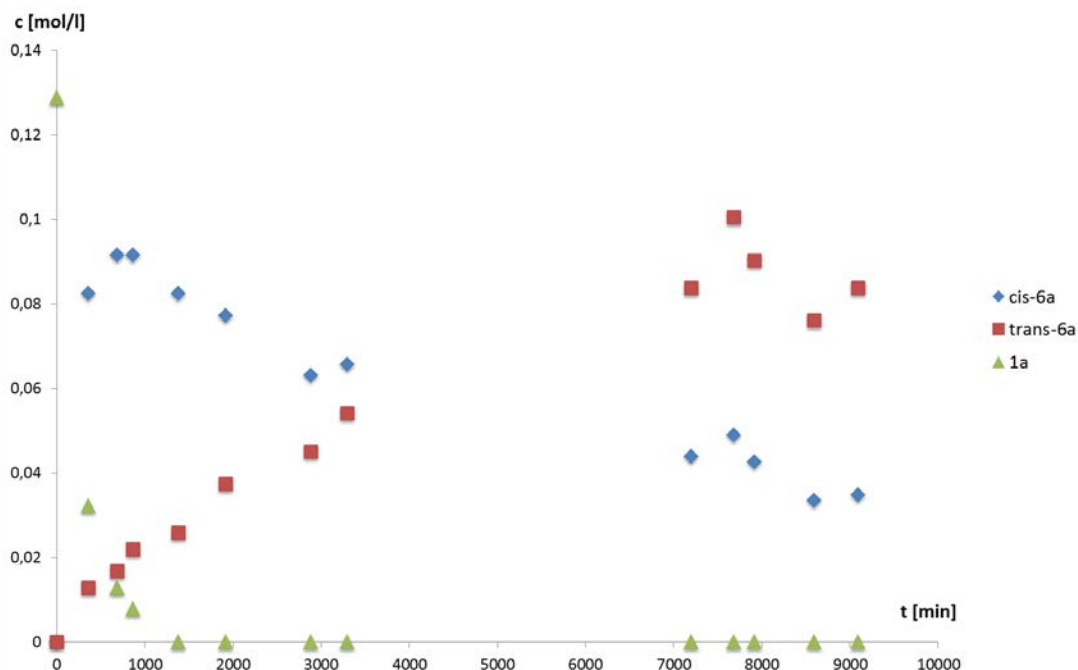

Figure S2. Reaction profile of the cyclopropanation of *N*-vinyl phthalimide using **1a**

Table S2. Measured concentration (<sup>1</sup>H NMR) during the cyclopropanation of *N*-vinyl phthalimide using **1a**

| t (min) | c( <i>cis</i> -6a) | ln (c( <i>cis</i> -6a)) | c( <i>trans</i> -6a) | ln (c( <i>trans</i> -6a)) | c( <b>1a</b> ) | ln (c( <b>1a</b> )) |
|---------|--------------------|-------------------------|----------------------|---------------------------|----------------|---------------------|
| 0       | 0                  | -                       | 0                    | -                         | 0,13           | -2,05               |
| 360     | 0,08               | -2,49                   | 0,01                 | -4,35                     | 0,03           | -3,43               |
| 690     | 0,09               | -2,39                   | 0,02                 | -4,09                     | 0,01           | -4,35               |
| 870     | 0,09               | -2,39                   | 0,02                 | -3,82                     | 0,01           | -4,86               |
| 1380    | 0,08               | -2,49                   | 0,03                 | -3,66                     | 0,00           | -                   |
| 1920    | 0,08               | -2,56                   | 0,04                 | -3,29                     | 0,00           | -                   |
| 2880    | 0,06               | -2,76                   | 0,05                 | -3,10                     | 0,00           | -                   |
| 3300    | 0,07               | -2,72                   | 0,05                 | -2,92                     | 0,00           | -                   |
| 7200    | 0,04               | -3,13                   | 0,08                 | -2,48                     | 0,00           | -                   |
| 7680    | 0,05               | -3,02                   | 0,10                 | -2,30                     | 0,00           | -                   |
| 7920    | 0,04               | -3,16                   | 0,09                 | -2,40                     | 0,00           | -                   |
| 8595    | 0,03               | -3,40                   | 0,08                 | -2,58                     | 0,00           | -                   |
| 9090    | 0,03               | -3,36                   | 0,08                 | -2,48                     | 0,00           | -                   |

From these data we were able to obtain the initial rate by plotting the concentration (ln(mol·l<sup>-1</sup>)) of **1a** versus the reaction time (Figure S3). We were assuming a pseudo-first order kinetic due to the excess of substrate relative to gold catalyst **A**.

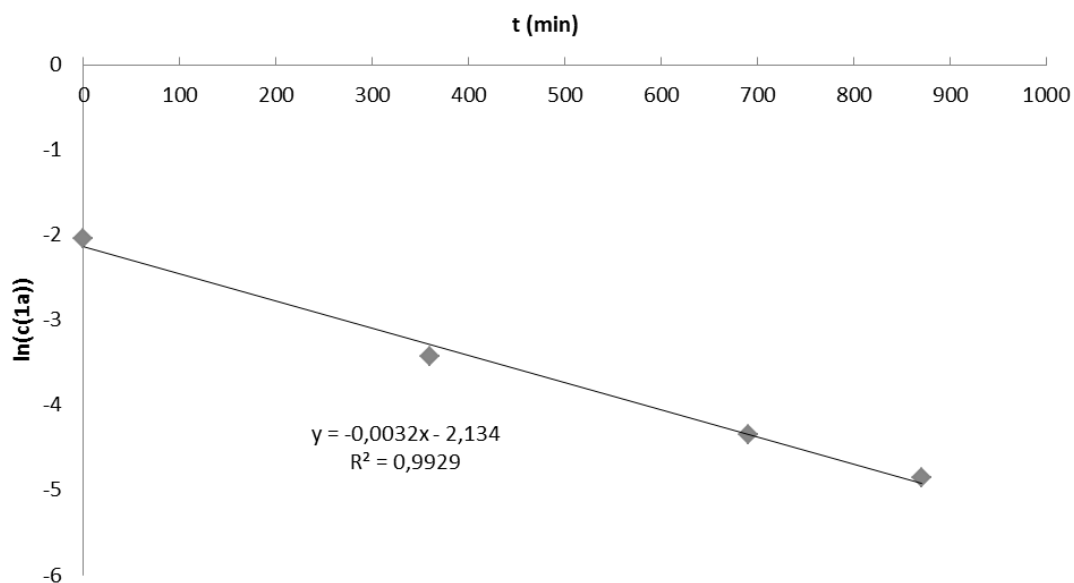

Figure S3. Initial rate plot for consumption of **1a**.

A reaction rate constant of  $k = -5.33 \cdot 10^{-5} \text{ /s}$  for the consumption of cycloheptatrienes **1a** was determined. Using the rewritten Eyring equation below, we were able to estimate the value for the energy of activation to be  $27.0 \text{ kcal}\cdot\text{mol}^{-1}$ .

$$\Delta G^\ddagger = -RT \ln \frac{-k_r h}{k_B T}$$

Where:

|                     |   |                             |                              |                                                  |
|---------------------|---|-----------------------------|------------------------------|--------------------------------------------------|
| $\Delta G^\ddagger$ | = | Gibbs energy of activation  | 120998.3                     | $\text{J}\cdot\text{mol}^{-1}$                   |
| $R$                 | = | <i>Gas constant</i>         | 8.3144598                    | $\text{J}\cdot\text{K}^{-1}\cdot\text{mol}^{-1}$ |
| $T$                 | = | Absolute temperature        | 348                          | K                                                |
| $k_r$               | = | Reaction rate constant      | $-5.33 \cdot 10^{-5}$        | $\text{mol}\cdot\text{s}^{-1}$                   |
| $h$                 | = | <i>Planck constant</i>      | $6.626070040 \cdot 10^{-34}$ | J·s                                              |
| $k_B$               | = | <i>Boltzmann's constant</i> | $1.38064852 \cdot 10^{-23}$  | $\text{J}\cdot\text{K}^{-1}$                     |

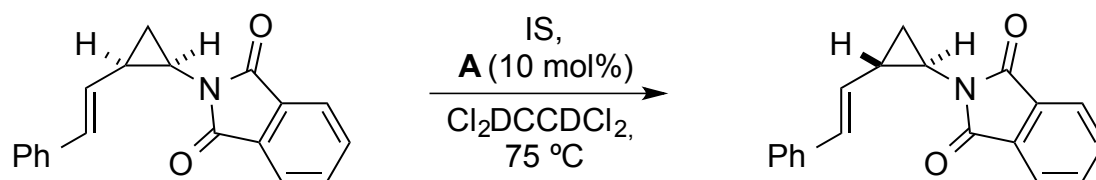

### Initial rate studies for the gold(I) mediated epimerization of 6a.

*cis*-(*E*)-2-(2-styrylcyclopropyl)isoindoline-1,3-dione **6a** (4.5 mg, 0.0155 mmol), gold catalyst **A** (1.2 mg, 0.00155 mmol, 10 mol%) and diphenylmethane (2.6  $\mu$ L, 0.0155 mmol) were added to a Young NMR tube and the atmosphere was flushed with argon three times before adding 1,1,2,2-tetrachloroethane-*d*2 (0.4 mL). The mixture was heated in a Bruker NMR machine to 75 °C for 7 hours, while performing  $^1\text{H}$  measurements every 20 minutes.

The corrected data, to the internal standard, is presented in Table S3:

Table S3. Measured concentration ( $^1\text{H}$  NMR) of *cis*-6a during its isomerization to *trans*-6a

| Concentration of <i>cis</i> -6a <sup>a</sup> (M) | ln(concentration of <i>cis</i> -6a) <sup>b</sup> | Time (s)            |
|--------------------------------------------------|--------------------------------------------------|---------------------|
| 0,01574 <sup>[c]</sup>                           | -4,133 <sup>[c]</sup>                            | 0 <sup>[c]</sup>    |
| 0,01632 <sup>[c]</sup>                           | -4,146 <sup>[c]</sup>                            | 1200 <sup>[c]</sup> |
| 0,02118 <sup>[c]</sup>                           | -4,161 <sup>[c]</sup>                            | 2400 <sup>[c]</sup> |
| 0,02605                                          | -4,174                                           | 3600                |
| 0,02638                                          | -4,184                                           | 4800                |
| 0,02729                                          | -4,187                                           | 6000                |
| 0,02693                                          | -4,196                                           | 7200                |
| 0,03389                                          | -4,209                                           | 8400                |
| 0,03467                                          | -4,212                                           | 9600                |
| 0,03572                                          | -4,219                                           | 10800               |
| 0,03779                                          | -4,221                                           | 12000               |
| 0,04145                                          | -4,232                                           | 13200               |
| 0,04171                                          | -4,240                                           | 14400               |
| 0,04197                                          | -4,248                                           | 15600               |
| 0,05034                                          | -4,251                                           | 16800               |
| 0,05060                                          | -4,253                                           | 18000               |
| 0,04467                                          | -4,266                                           | 19200               |
| 0,05675                                          | -4,267                                           | 20400               |
| 0,05216                                          | -4,275                                           | 21600               |
| 0,05120                                          | -4,280                                           | 22800               |
| 0,05758                                          | -4,284                                           | 24000               |

<sup>a</sup>The disappearance of the *cis*-isomer was used for our data set as the accuracy was better compared to the appearance of the *trans*-isomer. <sup>b</sup>We are assuming 1<sup>st</sup>-order kinetics; hence the concentration is presented as the natural logarithm. <sup>c</sup>The first three data points were omitted to reduce the experimental error.



From these data we were able to make an initial rate plot with the concentration ( $\ln(\text{mol}\cdot\text{l}^{-1})$ ) of *cis*-6a versus reaction time (s) (Figure S4).

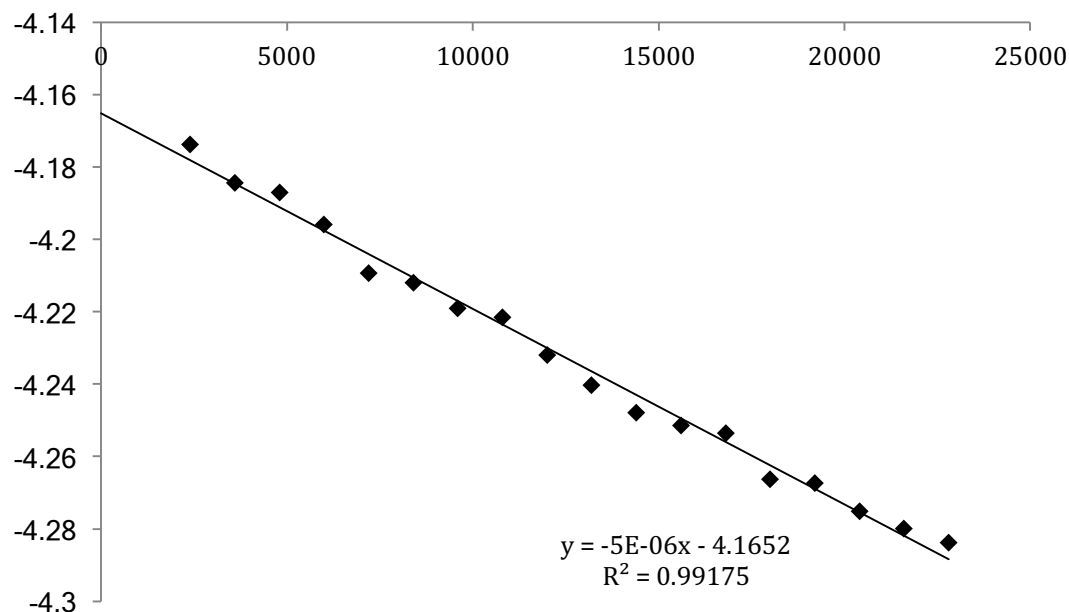

Figure S4. Initial rate plot for the epimerization of *cis*-6a.

A reaction rate constant of  $-5\cdot 10^{-6}$  for the disappearance of the *cis*-isomer was derived from this plot. Using the rewritten Eyring equation below, we were able to estimate the value for the energy of activation to be **28.9** kcal $\cdot\text{mol}^{-1}$ .

$$\Delta G^\ddagger = -RT \ln \frac{-k_r h}{k_B T}$$

Where:

|                     |   |                            |                             |                                            |
|---------------------|---|----------------------------|-----------------------------|--------------------------------------------|
| $\Delta G^\ddagger$ | = | Gibbs energy of activation | 120998.3                    | J $\cdot\text{mol}^{-1}$                   |
| $R$                 | = | Gas constant               | 8.3144598                   | J $\cdot\text{K}^{-1}\cdot\text{mol}^{-1}$ |
| $T$                 | = | Absolute temperature       | 348                         | K                                          |
| $k_r$               | = | Reaction rate constant     | $-5\cdot 10^{-6}$           | $\text{mol}\cdot\text{s}^{-1}$             |
| $h$                 | = | Planck constant            | $6.626070040\cdot 10^{-34}$ | J $\cdot\text{s}$                          |
| $k_B$               | = | Boltzmann's constant       | $1.38064852\cdot 10^{-23}$  | J $\cdot\text{K}^{-1}$                     |

**Calculating the energy difference between the *cis*- and *trans*-isomers of **3g** and **6a**.**

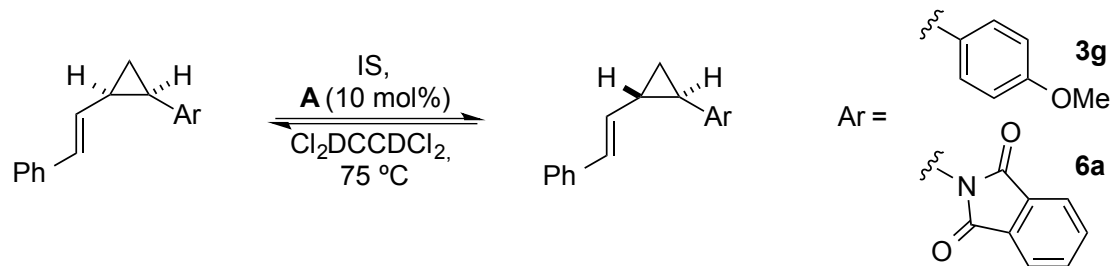

**3g:** *cis*-(*E*)-1-methoxy-4-(2-styrylcyclopropyl)benzene **3g** (3.8 mg, 0.03 mmol), gold catalyst **A** (2.3 mg, 0.003 mmol, 10 mol%) and diphenylmethane (4.8  $\mu\text{L}$ , 0.03 mmol) were added to a Young NMR tube and the atmosphere was flushed with argon three times before adding chloroform-*d*1 (0.4 mL). The mixture was heated to 75  $^\circ\text{C}$  for 7 days, until equilibrium was reached, with a *cis*/*trans* ratio of 0.148:1.

**6a:** *cis*-(*E*)-2-(2-styrylcyclopropyl)isoindoline-1,3-dione **6a** (4.5 mg, 0.0155 mmol), gold catalyst **A** (1.2 mg, 0.00155 mmol, 10 mol%) and diphenylmethane (2.6  $\mu\text{L}$ , 0.0155 mmol) were added to a Young NMR tube and the atmosphere was flushed with argon three times before adding 1,1,2,2-tetrachloroethane-*d*2 (0.4 mL). The mixture was heated to 75  $^\circ\text{C}$  for 2 weeks, until equilibrium was reached, with a *cis*/*trans* ratio of 0.465:1.

Using the ratio of the as the equilibrium constant,  $k_{eq}$ , in the following equation, we estimated the difference in Gibbs free energy for the two isomers:

$$\Delta G^\theta = -RT \ln k_{eq}$$

Where:

|                   |                              |                                                                           |
|-------------------|------------------------------|---------------------------------------------------------------------------|
| $\Delta G^\theta$ | = Gibbs energy of activation | 5446.5 ( <b>3g</b> ), 2246.7 ( <b>6a</b> ) $\text{J}\cdot\text{mol}^{-1}$ |
| $R$               | = Gas constant               | 8.3144598 $\text{J}\cdot\text{K}^{-1}\cdot\text{mol}^{-1}$                |
| $T$               | = Absolute temperature       | 348 K                                                                     |
| $k_{eq}$          | = Reaction rate constant     | 0.148 ( <b>3g</b> ), 0.465 ( <b>6a</b> ) $\text{mol}\cdot\text{s}^{-1}$   |

Signifying that *trans*-**3g** is more stable by 1.3  $\text{kcal}\cdot\text{mol}^{-1}$  and *trans*-**6a** is more stable by 0.5  $\text{kcal}\cdot\text{mol}^{-1}$ .

## 10. X-ray crystallography

Crystal structure determinations were carried out using a Bruker-Nonius diffractometer equipped with an APPEX 24K CCD area detector, a FR591 rotating anode with MoK $\alpha$  radiation, Montel mirrors as monochromator and a Kryoflex low temperature device ( $T = -173$  °C). Full-sphere data collection was used with  $\omega$  and  $\chi$  scans. Programs used: Data collection APEX-2, data reduction Bruker Saint V/.60A and absorption correction SADABS. Structure Solution and Refinement: Crystal structure solutions were achieved using direct methods as implemented in SHELXTL and visualized using the program XP. Missing atoms were subsequently located from difference Fourier synthesis and added to the atom list. Least-squares refinement on F<sup>2</sup> using all measured intensities was carried out using the program SHELXTL. All non-hydrogen atoms were refined including anisotropic displacement parameters. ORTEP drawings are represented with 50% probability of the thermal ellipsoids.

## Crystal data and structure refinement for *cis-3a*

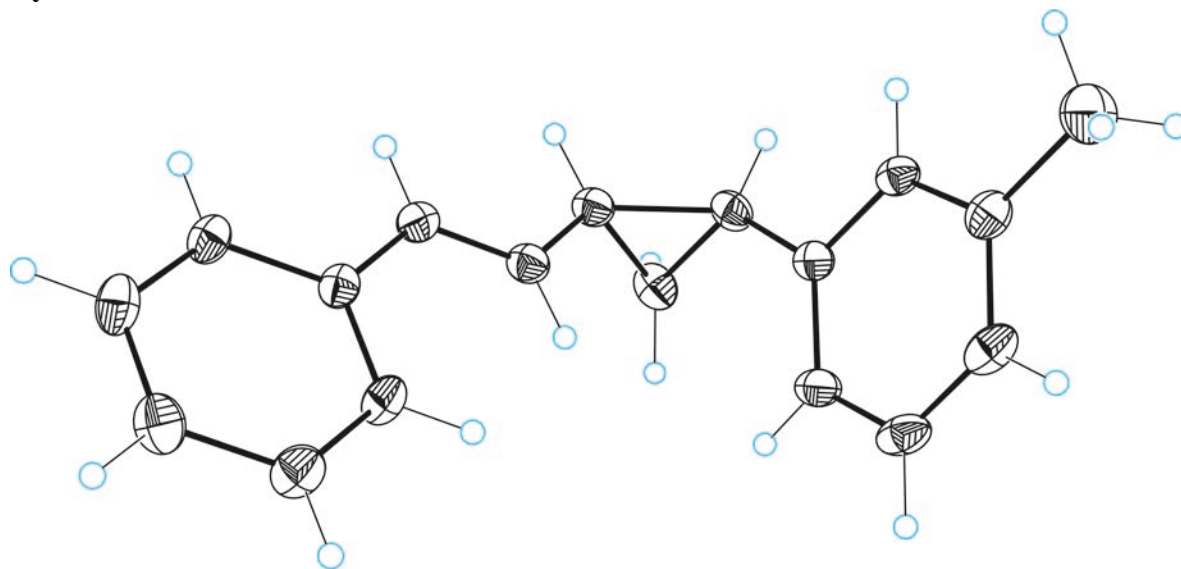

|                                   |                                                   |                  |
|-----------------------------------|---------------------------------------------------|------------------|
| Empirical formula                 | C <sub>18</sub> H <sub>18</sub>                   |                  |
| Formula weight                    | 234.32                                            |                  |
| Temperature                       | 100(2) K                                          |                  |
| Wavelength                        | 0.71073 Å                                         |                  |
| Crystal system                    | Monoclinic                                        |                  |
| Space group                       | P2(1)                                             |                  |
| Unit cell dimensions              | a = 9.035(2) Å                                    | α = 90°.         |
|                                   | b = 5.7594(15) Å                                  | β = 100.891(7)°. |
|                                   | c = 13.277(3) Å                                   | γ = 90°.         |
| Volume                            | 678.5(3) Å <sup>3</sup>                           |                  |
| Z                                 | 2                                                 |                  |
| Density (calculated)              | 1.147 Mg/m <sup>3</sup>                           |                  |
| Absorption coefficient            | 0.064 mm <sup>-1</sup>                            |                  |
| F(000)                            | 252                                               |                  |
| Crystal size                      | 0.20 x 0.15 x 0.06 mm <sup>3</sup>                |                  |
| Theta range for data collection   | 2.295 to 32.557°.                                 |                  |
| Index ranges                      | -13 ≤ h ≤ 12, -8 ≤ k ≤ 5, -19 ≤ l ≤ 15            |                  |
| Reflections collected             | 9047                                              |                  |
| Independent reflections           | 3680 [R(int) = 0.0254]                            |                  |
| Completeness to theta = 32.557°   | 92.7%                                             |                  |
| Absorption correction             | Empirical                                         |                  |
| Max. and min. transmission        | 0.996 and 0.874                                   |                  |
| Refinement method                 | Full-matrix least-squares on F <sup>2</sup>       |                  |
| Data / restraints / parameters    | 3680 / 1 / 164                                    |                  |
| Goodness-of-fit on F <sup>2</sup> | 1.050                                             |                  |
| Final R indices [I > 2σ(I)]       | R <sub>1</sub> = 0.0420, wR <sub>2</sub> = 0.0989 |                  |
| R indices (all data)              | R <sub>1</sub> = 0.0544, wR <sub>2</sub> = 0.1056 |                  |
| Flack parameter                   | x = 0.1(10)                                       |                  |
| Largest diff. peak and hole       | 0.251 and -0.211 e.Å <sup>-3</sup>                |                  |

## Crystal data and structure refinement for *endo*-3al

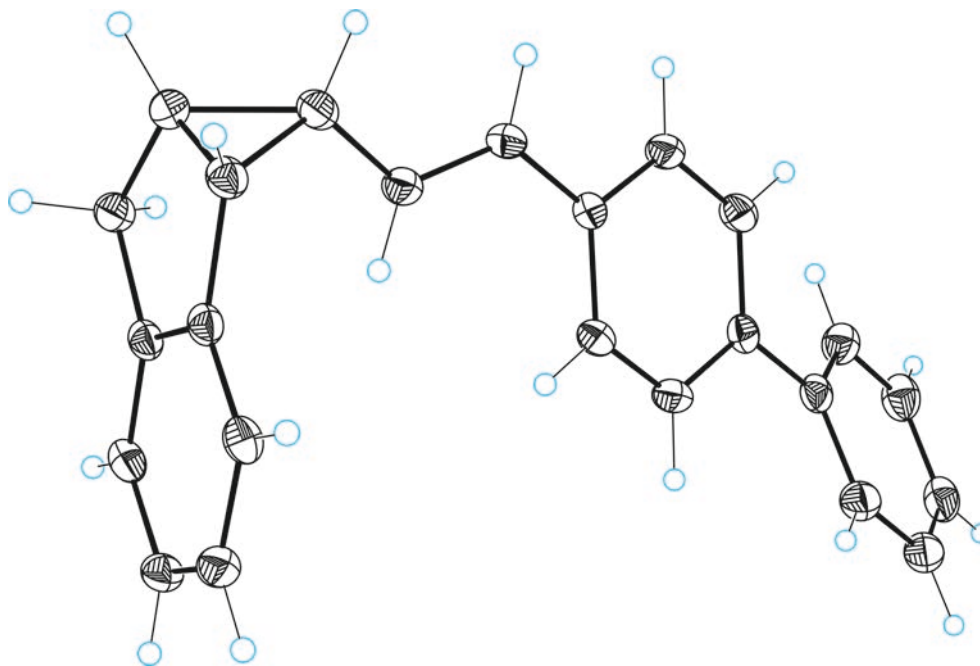

|                                   |                                             |          |
|-----------------------------------|---------------------------------------------|----------|
| Empirical formula                 | C <sub>24</sub> H <sub>20</sub>             |          |
| Formula weight                    | 308.40                                      |          |
| Temperature                       | 100(2) K                                    |          |
| Wavelength                        | 0.71073 Å                                   |          |
| Crystal system                    | Orthorhombic                                |          |
| Space group                       | Pca2(1)                                     |          |
| Unit cell dimensions              | a = 9.9863(13)Å                             | α = 90°. |
|                                   | b = 18.438(2)Å                              | β = 90°. |
|                                   | c = 8.9744(13)Å                             | γ = 90°. |
| Volume                            | 1652.4(4) Å <sup>3</sup>                    |          |
| Z                                 | 4                                           |          |
| Density (calculated)              | 1.240 Mg/m <sup>3</sup>                     |          |
| Absorption coefficient            | 0.070 mm <sup>-1</sup>                      |          |
| F(000)                            | 656                                         |          |
| Crystal size                      | 0.40 x 0.40 x 0.06 mm <sup>3</sup>          |          |
| Theta range for data collection   | 2.209 to 31.541°.                           |          |
| Index ranges                      | -7 ≤ h ≤ 14, -17 ≤ k ≤ 27, -12 ≤ l ≤ 13     |          |
| Reflections collected             | 12057                                       |          |
| Independent reflections           | 5071 [R(int) = 0.0401]                      |          |
| Completeness to theta = 31.541°   | 97.299995%                                  |          |
| Absorption correction             | Multi-scan                                  |          |
| Max. and min. transmission        | 0.996 and 0.837                             |          |
| Refinement method                 | Full-matrix least-squares on F <sup>2</sup> |          |
| Data / restraints / parameters    | 5071/ 1/ 217                                |          |
| Goodness-of-fit on F <sup>2</sup> | 1.051                                       |          |
| Final R indices [I > 2σ(I)]       | R1 = 0.0573, wR2 = 0.1275                   |          |
| R indices (all data)              | R1 = 0.0810, wR2 = 0.1408                   |          |
| Flack parameter                   | x = -0.1(10)                                |          |
| Largest diff. peak and hole       | 0.289 and -0.233 e.Å <sup>-3</sup>          |          |

## Crystal data and structure refinement for *cis-6e*

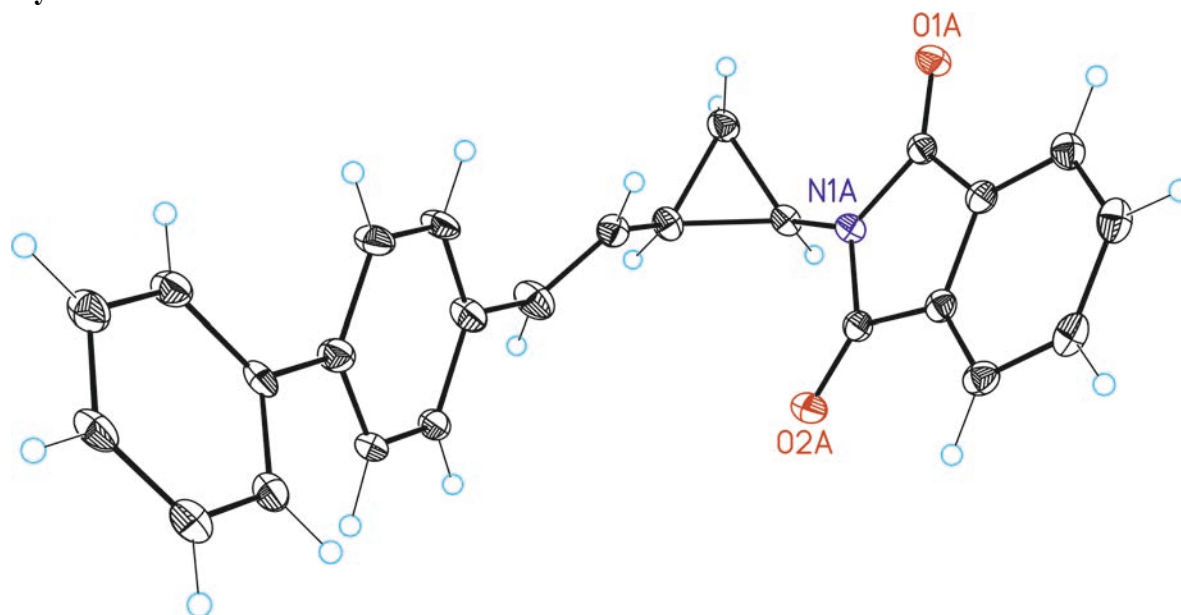

|                                   |                                                  |                 |
|-----------------------------------|--------------------------------------------------|-----------------|
| Empirical formula                 | C <sub>25</sub> H <sub>19</sub> N O <sub>2</sub> |                 |
| Formula weight                    | 365.41                                           |                 |
| Temperature                       | 100(2) K                                         |                 |
| Wavelength                        | 0.71073 Å                                        |                 |
| Crystal system                    | Triclinic                                        |                 |
| Space group                       | P-1                                              |                 |
| Unit cell dimensions              | a = 9.8574(4) Å                                  | α = 83.974(3)°. |
|                                   | b = 10.5363(4) Å                                 | β = 85.964(3)°. |
|                                   | c = 19.0980(6) Å                                 | γ = 69.875(4)°. |
| Volume                            | 1850.89(13) Å <sup>3</sup>                       |                 |
| Z                                 | 4                                                |                 |
| Density (calculated)              | 1.311 Mg/m <sup>3</sup>                          |                 |
| Absorption coefficient            | 0.083 mm <sup>-1</sup>                           |                 |
| F(000)                            | 768                                              |                 |
| Crystal size                      | 0.12 x 0.12 x 0.03 mm <sup>3</sup>               |                 |
| Theta range for data collection   | 2.202 to 28.875°.                                |                 |
| Index ranges                      | -13 ≤ h ≤ 12, -13 ≤ k ≤ 13, -23 ≤ l ≤ 23         |                 |
| Reflections collected             | 30805                                            |                 |
| Independent reflections           | 8327 [R(int) = 0.0463]                           |                 |
| Completeness to theta = 28.875°   | 85.6%                                            |                 |
| Absorption correction             | Empirical                                        |                 |
| Max. and min. transmission        | 0.998 and 0.768                                  |                 |
| Refinement method                 | Full-matrix least-squares on F <sup>2</sup>      |                 |
| Data / restraints / parameters    | 8327 / 230 / 669                                 |                 |
| Goodness-of-fit on F <sup>2</sup> | 1.052                                            |                 |
| Final R indices [I > 2σ(I)]       | R1 = 0.0491, wR2 = 0.1309                        |                 |
| R indices (all data)              | R1 = 0.0795, wR2 = 0.1458                        |                 |
| Largest diff. peak and hole       | 0.377 and -0.261 e.Å <sup>-3</sup>               |                 |

## Crystal data and structure refinement for *trans*-6e

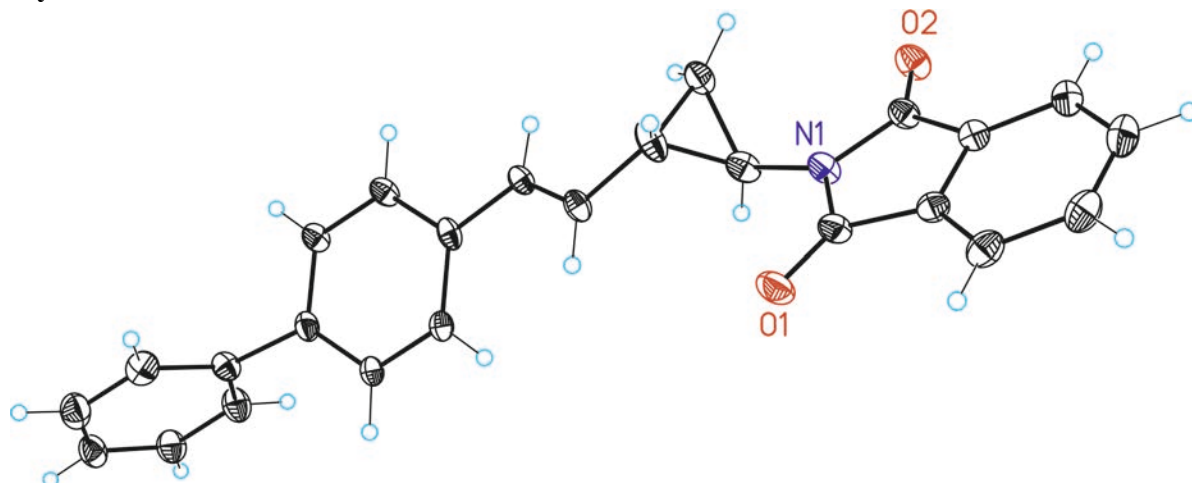

|                                   |                                                  |                   |
|-----------------------------------|--------------------------------------------------|-------------------|
| Empirical formula                 | C <sub>25</sub> H <sub>19</sub> N O <sub>2</sub> |                   |
| Formula weight                    | 365.41                                           |                   |
| Temperature                       | 100(2) K                                         |                   |
| Wavelength                        | 0.71073 Å                                        |                   |
| Crystal system                    | Monoclinic                                       |                   |
| Space group                       | P2(1)/c                                          |                   |
| Unit cell dimensions              | a = 4.88608(8)Å                                  | α = 90°.          |
|                                   | b = 39.9585(6)Å                                  | β = 91.1105(15)°. |
|                                   | c = 9.27521(15)Å                                 | γ = 90°.          |
| Volume                            | 1810.55(5) Å <sup>3</sup>                        |                   |
| Z                                 | 4                                                |                   |
| Density (calculated)              | 1.341 Mg/m <sup>3</sup>                          |                   |
| Absorption coefficient            | 0.085 mm <sup>-1</sup>                           |                   |
| F(000)                            | 768                                              |                   |
| Crystal size                      | 0.2 x 0.18 x 0.03 mm <sup>3</sup>                |                   |
| Theta range for data collection   | 2.039 to 60.660°                                 |                   |
| Index ranges                      | -11 ≤ h ≤ 11, -96 ≤ k ≤ 94, -22 ≤ l ≤ 20         |                   |
| Reflections collected             | 106963                                           |                   |
| Independent reflections           | 25432 [R(int) = 0.0484]                          |                   |
| Completeness to theta = 60.660°   | 91.0%                                            |                   |
| Absorption correction             | Multi-scan                                       |                   |
| Max. and min. transmission        | 0.998 and 0.768                                  |                   |
| Refinement method                 | Full-matrix least-squares on F <sup>2</sup>      |                   |
| Data / restraints / parameters    | 25432 / 710 / 532                                |                   |
| Goodness-of-fit on F <sup>2</sup> | 1.048                                            |                   |
| Final R indices [I > 2σ(I)]       | R1 = 0.0910, wR2 = 0.2494                        |                   |
| R indices (all data)              | R1 = 0.1348, wR2 = 0.2737                        |                   |
| Largest diff. peak and hole       | 0.865 and -0.897 e.Å <sup>-3</sup>               |                   |

## 11. DFT calculations

### Computational details

Calculations were performed using SMD(CH<sub>2</sub>Cl<sub>2</sub>)-M06/6-311+G(2d,p), SDD(Au,  $\zeta_f=1.05$ )/SMD(CH<sub>2</sub>Cl<sub>2</sub>)-M06/6-31G(d), SDD(Au) at the standard state (298.15 K, 1 atm). Full geometry optimizations were performed in solution, with the SMD method,<sup>18</sup> and using Gaussian 09<sup>19</sup> defaults for dichloromethane (DCM). In the article, all energies are given in kcal/mol. In the experimental section, energies are given in Hartree. The nature of the stationary points was characterized by a vibrational analysis performed within the harmonic approximation at 298 K and 1 atm. Transition states were identified by the presence of one imaginary frequency and minima by a full set of real frequencies. Single point energies were calculated for all six cyclopropanation transition states using SMD(CH<sub>2</sub>Cl<sub>2</sub>)-PBE-D3(BJ)/6-311+G(2d,p), SDD(Au,  $\zeta_f=1.05$ ). Optimized geometries were visualized using CYLview.<sup>20</sup>



## Calculated free energy profile for the formation of 3b

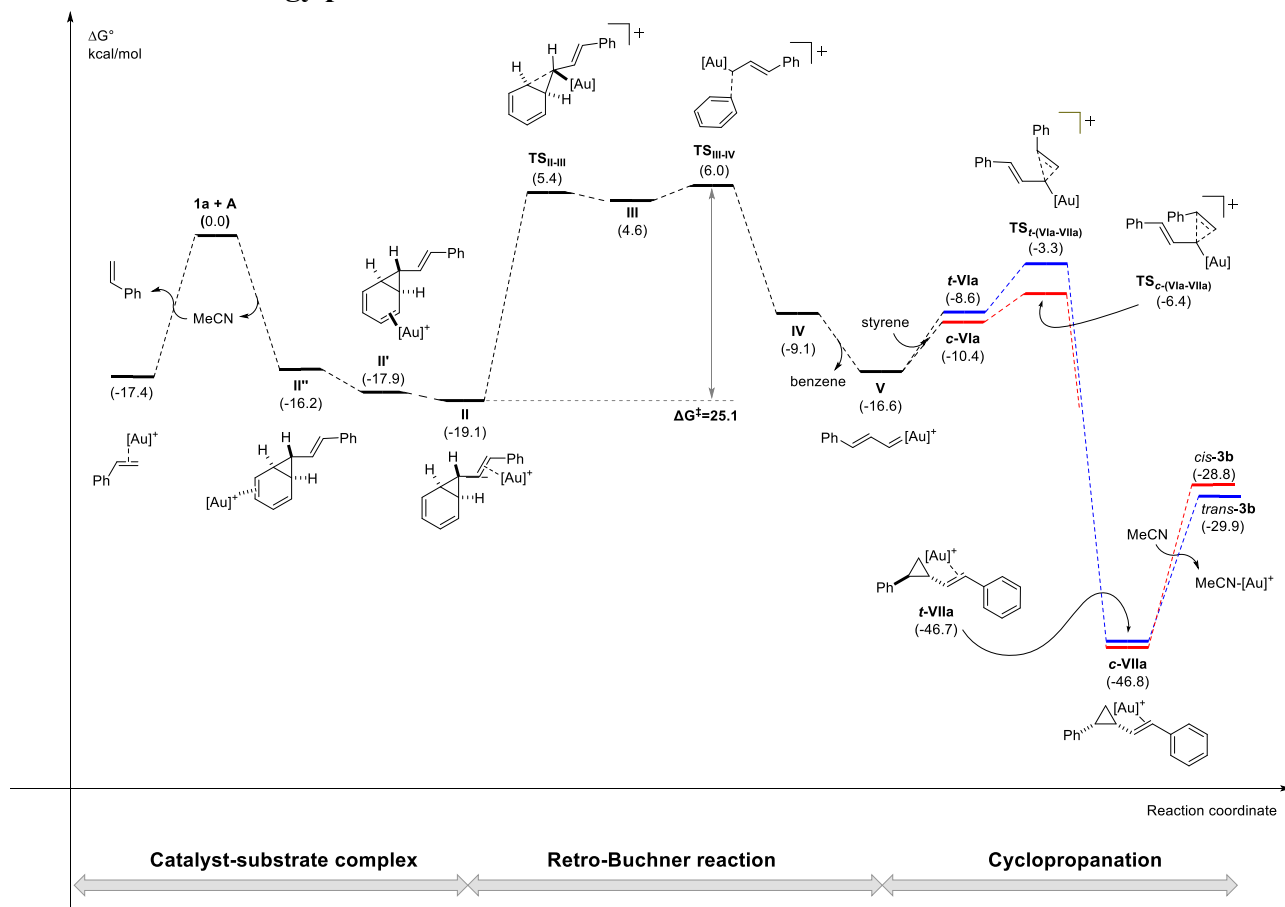

Computational details:  
 SMD(CH<sub>2</sub>Cl<sub>2</sub>)-M06/6-311+G(2d,p), SDD(Au,  $r=1.05$ )/SMD(CH<sub>2</sub>Cl<sub>2</sub>)-M06/6-31G(d), SDD(Au)  
 Gibbs free energies given in kcal/mol at the standard state (298.15 K, 1 atm)  
 [Au] = Au-JohnPhos

## Cartesian coordinates (in Å) and energies (in h) for reactants, intermediates and transition states involved in the formation of 3b

### Intermediate I

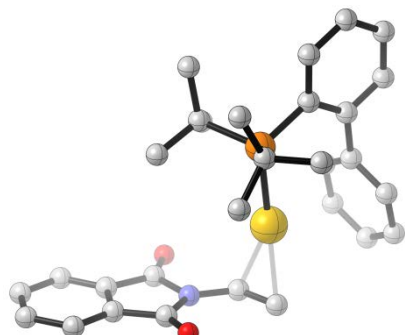

|    |              |              |              |
|----|--------------|--------------|--------------|
| 6  | -1.844913000 | 2.101325000  | -0.311194000 |
| 1  | -1.590501000 | 2.658811000  | 0.592879000  |
| 79 | 0.111347000  | 0.657979000  | -0.588759000 |
| 15 | 1.381722000  | -1.266669000 | -0.062609000 |
| 6  | 0.481240000  | -2.138379000 | 1.352432000  |
| 6  | 1.521439000  | -2.296867000 | -1.651871000 |
| 6  | 3.088049000  | -0.912745000 | 0.520760000  |
| 6  | -0.895473000 | -2.577910000 | 0.857873000  |
| 6  | 0.308286000  | -1.089902000 | 2.452879000  |
| 6  | 1.222562000  | -3.338180000 | 1.938043000  |
| 6  | 1.801516000  | -3.783046000 | -1.442669000 |
| 6  | 2.641010000  | -1.666631000 | -2.482447000 |
| 6  | 0.209129000  | -2.157777000 | -2.430538000 |
| 6  | 3.947930000  | -1.995971000 | 0.768756000  |
| 6  | 3.596022000  | 0.396609000  | 0.664144000  |
| 1  | -0.837185000 | -3.394962000 | 0.126501000  |
| 1  | -1.477247000 | -2.945371000 | 1.716392000  |
| 1  | -1.458560000 | -1.746614000 | 0.405329000  |
| 1  | -0.286055000 | -0.226983000 | 2.113822000  |
| 1  | -0.219263000 | -1.550520000 | 3.301382000  |
| 1  | 1.273834000  | -0.719419000 | 2.825600000  |
| 1  | 0.584706000  | -3.787818000 | 2.713555000  |
| 1  | 1.435134000  | -4.117356000 | 1.196449000  |
| 1  | 2.162657000  | -3.045701000 | 2.421454000  |
| 1  | 1.895496000  | -4.256617000 | -2.431613000 |
| 1  | 2.738884000  | -3.974693000 | -0.907655000 |
| 1  | 0.983729000  | -4.291364000 | -0.915905000 |
| 1  | 3.632977000  | -1.824380000 | -2.039978000 |
| 1  | 2.640176000  | -2.128812000 | -3.480540000 |
| 1  | 2.493295000  | -0.584348000 | -2.621272000 |
| 1  | 0.290626000  | -2.741336000 | -3.359762000 |
| 1  | -0.659119000 | -2.536638000 | -1.876495000 |
| 1  | 0.004874000  | -1.114079000 | -2.709934000 |
| 6  | 5.275120000  | -1.810195000 | 1.130325000  |
| 1  | 3.577964000  | -3.013774000 | 0.675824000  |
| 6  | 4.941872000  | 0.563009000  | 1.017931000  |
| 6  | 2.828019000  | 1.661969000  | 0.489675000  |
| 6  | 5.778349000  | -0.519795000 | 1.247689000  |
| 1  | 5.910642000  | -2.673700000 | 1.316196000  |
| 1  | 5.328053000  | 1.576908000  | 1.120454000  |
| 6  | 2.036115000  | 2.166638000  | 1.528379000  |
| 6  | 3.010719000  | 2.438564000  | -0.659798000 |
| 1  | 6.818587000  | -0.354502000 | 1.522323000  |
| 6  | 1.429844000  | 3.415778000  | 1.411933000  |
| 1  | 1.911389000  | 1.581835000  | 2.440292000  |
| 6  | 2.402186000  | 3.686293000  | -0.776563000 |
| 1  | 3.649808000  | 2.063182000  | -1.460420000 |
| 6  | 1.612163000  | 4.179030000  | 0.260037000  |
| 1  | 0.826383000  | 3.800170000  | 2.233419000  |
| 1  | 2.561711000  | 4.281303000  | -1.674636000 |
| 1  | 1.149973000  | 5.161516000  | 0.175463000  |

|   |              |              |              |
|---|--------------|--------------|--------------|
| 6 | -1.170209000 | 2.323397000  | -1.484195000 |
| 1 | -1.519313000 | 1.917334000  | -2.430489000 |
| 1 | -0.455312000 | 3.147252000  | -1.502498000 |
| 7 | -2.938120000 | 1.277980000  | -0.125385000 |
| 6 | -3.561728000 | 0.438326000  | -1.085875000 |
| 6 | -3.501569000 | 1.082917000  | 1.171968000  |
| 8 | -3.087948000 | 1.618070000  | 2.171404000  |
| 8 | -3.223004000 | 0.336787000  | -2.241651000 |
| 6 | -4.637394000 | -0.259792000 | -0.356097000 |
| 6 | -4.601682000 | 0.123226000  | 0.984204000  |
| 6 | -5.495488000 | -0.386688000 | 1.908887000  |
| 1 | -5.461131000 | -0.084494000 | 2.953534000  |
| 6 | -5.569032000 | -1.167034000 | -0.827319000 |
| 1 | -5.589851000 | -1.460537000 | -1.874866000 |
| 6 | -6.477842000 | -1.684159000 | 0.098346000  |
| 1 | -7.228938000 | -2.398601000 | -0.231877000 |
| 6 | -6.441461000 | -1.301411000 | 1.441386000  |
| 1 | -7.164880000 | -1.724320000 | 2.135356000  |

Zero-point correction= 0.570081  
 (Hartree/Particle)  
 Thermal correction to Energy= 0.604800  
 Thermal correction to Enthalpy= 0.605744  
 Thermal correction to Gibbs Free Energy= 0.504808  
 Sum of electronic and zero-point Energies= -1844.327363  
 Sum of electronic and thermal Energies= -1844.292644  
 Sum of electronic and thermal Enthalpies= -1844.291700  
 Sum of electronic and thermal Free Energies= -1844.392636

E(M06/6-311+G(2d,p))= -1845.31429483

### Reactant 1a

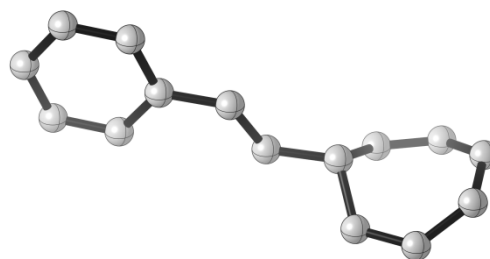

|   |              |              |              |
|---|--------------|--------------|--------------|
| 6 | 1.610298000  | 0.038795000  | 0.025044000  |
| 1 | 1.727478000  | -0.836916000 | -0.639474000 |
| 6 | 2.332806000  | -0.242341000 | 1.316153000  |
| 1 | 1.809135000  | -0.044105000 | 2.253837000  |
| 6 | 3.578132000  | -0.762683000 | 1.329712000  |
| 1 | 4.003793000  | -1.071964000 | 2.286617000  |
| 6 | 4.424308000  | -0.909614000 | 0.173699000  |
| 1 | 5.220702000  | -1.653265000 | 0.240942000  |
| 6 | 4.430036000  | -0.083450000 | -0.911913000 |
| 1 | 5.229891000  | -0.221625000 | -1.642021000 |
| 6 | 3.590540000  | 1.073869000  | -1.082843000 |
| 1 | 4.023233000  | 1.913853000  | -1.630365000 |
| 6 | 2.342370000  | 1.203619000  | -0.586272000 |
| 1 | 1.823490000  | 2.162694000  | -0.646043000 |
| 6 | 0.155745000  | 0.320207000  | 0.228404000  |
| 1 | -0.070417000 | 1.187934000  | 0.857422000  |
| 6 | -0.829854000 | -0.415494000 | -0.297660000 |
| 1 | -0.553133000 | -1.281859000 | -0.907205000 |
| 6 | -2.272257000 | -0.202388000 | -0.150097000 |
| 6 | -3.152599000 | -1.154065000 | -0.682587000 |
| 6 | -2.820704000 | 0.916366000  | 0.495613000  |

|   |              |              |              |
|---|--------------|--------------|--------------|
| 6 | -4.530484000 | -1.002241000 | -0.570555000 |
| 1 | -2.740489000 | -2.026236000 | -1.191876000 |
| 6 | -4.195926000 | 1.069379000  | 0.607539000  |
| 1 | -2.163610000 | 1.681049000  | 0.908911000  |
| 6 | -5.058884000 | 0.110896000  | 0.076395000  |
| 1 | -5.193975000 | -1.756601000 | -0.991272000 |
| 1 | -4.600293000 | 1.946361000  | 1.111376000  |
| 1 | -6.136984000 | 0.235546000  | 0.165363000  |

Zero-point correction= 0.241319  
(Hartree/Particle)  
Thermal correction to Energy= 0.253993  
Thermal correction to Enthalpy= 0.254937  
Thermal correction to Gibbs Free Energy= 0.200878  
Sum of electronic and zero-point Energies= -579.253724  
Sum of electronic and thermal Energies= -579.241051  
Sum of electronic and thermal Enthalpies= -579.240106  
Sum of electronic and thermal Free Energies= -579.294166

E(M06/6-311+G(2d,p))= -579.664368112

**Catalyst A**

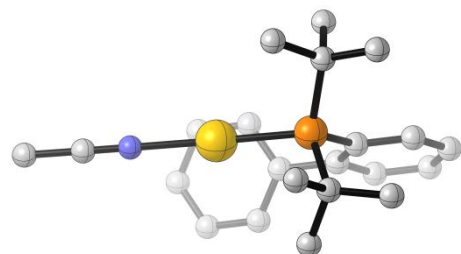

|    |              |              |              |
|----|--------------|--------------|--------------|
| 79 | -1.107991000 | -0.641689000 | -0.000382000 |
| 15 | 1.226928000  | -0.691515000 | -0.006240000 |
| 7  | -3.212423000 | -0.808817000 | -0.039306000 |
| 6  | 2.038714000  | 0.953916000  | 0.117122000  |
| 6  | -4.363974000 | -0.907738000 | -0.059490000 |
| 6  | 1.334122000  | 2.176608000  | 0.078952000  |
| 6  | -5.798881000 | -1.034451000 | -0.080804000 |
| 1  | -6.083355000 | -2.054234000 | 0.201238000  |
| 1  | -6.174514000 | -0.821790000 | -1.087742000 |
| 1  | -6.243417000 | -0.326268000 | 0.627035000  |
| 6  | 2.061478000  | 3.374910000  | 0.069135000  |
| 1  | 1.508661000  | 4.313264000  | 0.032253000  |
| 6  | 3.447460000  | 3.392031000  | 0.126003000  |
| 1  | 3.980578000  | 4.341012000  | 0.124386000  |
| 6  | 4.143229000  | 2.190753000  | 0.191812000  |
| 1  | 5.230004000  | 2.179577000  | 0.245593000  |
| 6  | 3.441778000  | 0.993193000  | 0.180125000  |
| 1  | 4.012106000  | 0.069031000  | 0.212224000  |
| 6  | -0.146514000 | 2.336838000  | 0.074012000  |
| 6  | -0.875797000 | 2.219560000  | 1.263785000  |
| 1  | -0.361254000 | 1.917693000  | 2.177290000  |
| 6  | -2.234728000 | 2.523971000  | 1.292944000  |
| 1  | -2.784336000 | 2.446213000  | 2.230067000  |
| 6  | -2.882591000 | 2.942815000  | 0.132419000  |
| 1  | -3.942760000 | 3.190172000  | 0.157212000  |
| 6  | -2.166862000 | 3.052526000  | -1.057667000 |
| 1  | -2.664700000 | 3.388604000  | -1.966082000 |
| 6  | -0.804804000 | 2.760699000  | -1.084786000 |
| 1  | -0.237883000 | 2.876991000  | -2.009243000 |
| 6  | 1.754017000  | -1.383282000 | -1.684974000 |
| 6  | 1.070385000  | -0.498734000 | -2.731006000 |
| 1  | 1.369349000  | -0.840266000 | -3.733277000 |
| 1  | 1.369574000  | 0.555309000  | -2.637581000 |
| 1  | -0.026403000 | -0.552972000 | -2.667963000 |
| 6  | 3.257780000  | -1.373001000 | -1.950471000 |
| 1  | 3.435623000  | -1.871470000 | -2.915156000 |
| 1  | 3.830705000  | -1.915925000 | -1.189481000 |
| 1  | 3.659784000  | -0.356143000 | -2.034536000 |

|   |              |              |              |
|---|--------------|--------------|--------------|
| 6 | 1.234369000  | -2.814877000 | -1.808154000 |
| 1 | 1.368449000  | -3.149831000 | -2.847440000 |
| 1 | 0.163950000  | -2.895355000 | -1.568199000 |
| 1 | 1.792778000  | -3.509458000 | -1.166502000 |
| 6 | 1.766671000  | -1.737839000 | 1.482402000  |
| 6 | 3.179057000  | -2.311255000 | 1.398872000  |
| 1 | 3.372868000  | -2.874895000 | 2.323837000  |
| 1 | 3.958175000  | -1.543321000 | 1.327236000  |
| 1 | 3.292239000  | -3.013171000 | 0.562411000  |
| 6 | 0.789081000  | -2.907319000 | 1.637135000  |
| 1 | 1.080512000  | -3.486731000 | 2.525999000  |
| 1 | 0.802812000  | -3.591823000 | 0.779318000  |
| 1 | -0.244337000 | -2.563608000 | 1.785996000  |
| 6 | 1.641998000  | -0.836396000 | 2.711069000  |
| 1 | 1.832246000  | -1.439412000 | 3.611038000  |
| 1 | 0.633166000  | -0.407697000 | 2.808608000  |
| 1 | 2.367789000  | -0.013170000 | 2.699798000  |

Zero-point correction= 0.466168  
(Hartree/Particle)  
Thermal correction to Energy= 0.494403  
Thermal correction to Enthalpy= 0.495347  
Thermal correction to Gibbs Free Energy= 0.408409  
Sum of electronic and zero-point Energies= -1386.985722  
Sum of electronic and thermal Energies= -1386.957487  
Sum of electronic and thermal Enthalpies= -1386.956543  
Sum of electronic and thermal Free Energies= -1387.043481

E(M06/6-311+G(2d,p))= -1387.71502669

**Reactant Acetonitrile**

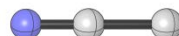

|   |              |              |              |
|---|--------------|--------------|--------------|
| 7 | -1.435812000 | -0.000095000 | 0.000013000  |
| 6 | -0.274570000 | 0.000173000  | 0.000107000  |
| 6 | 1.173518000  | 0.000053000  | -0.000006000 |
| 1 | 1.551565000  | -0.601171000 | -0.834293000 |
| 1 | 1.553175000  | -0.422402000 | 0.936994000  |
| 1 | 1.552255000  | 1.022884000  | -0.103398000 |

Zero-point correction= 0.045393  
(Hartree/Particle)  
Thermal correction to Energy= 0.048930  
Thermal correction to Enthalpy= 0.049875  
Thermal correction to Gibbs Free Energy= 0.021433  
Sum of electronic and zero-point Energies= -132.616203  
Sum of electronic and thermal Energies= -132.612666  
Sum of electronic and thermal Enthalpies= -132.611721  
Sum of electronic and thermal Free Energies= -132.640163

E(M06/6-311+G(2d,p))= -132.705649929

**Reactant phthalimide**

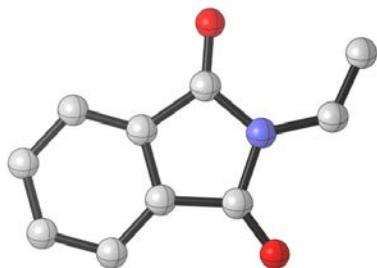

|   |              |              |              |
|---|--------------|--------------|--------------|
| 6 | -3.723292000 | -0.504295000 | -0.005629000 |
| 1 | -3.508602000 | -1.567362000 | -0.036504000 |
| 1 | -4.763217000 | -0.188396000 | 0.012081000  |
| 6 | -2.773969000 | 0.429379000  | 0.012627000  |
| 1 | -3.006620000 | 1.492953000  | 0.042446000  |
| 7 | -1.388382000 | 0.212121000  | -0.002197000 |
| 6 | -0.477689000 | 1.294462000  | -0.003420000 |
| 6 | -0.711914000 | -1.023759000 | -0.001993000 |
| 6 | 0.871198000  | 0.692166000  | -0.007414000 |
| 6 | 0.731279000  | -0.692031000 | -0.004057000 |
| 8 | -0.796250000 | 2.461514000  | -0.000333000 |
| 8 | -1.232426000 | -2.116782000 | 0.001327000  |
| 6 | 2.114548000  | 1.296847000  | -0.003683000 |
| 1 | 2.213888000  | 2.380667000  | -0.004224000 |
| 6 | 1.829134000  | -1.531918000 | 0.002096000  |
| 1 | 1.710143000  | -2.613779000 | 0.005718000  |
| 6 | 3.231468000  | 0.457556000  | 0.001769000  |
| 1 | 4.229216000  | 0.891998000  | 0.005642000  |
| 6 | 3.091055000  | -0.932103000 | 0.005006000  |
| 1 | 3.982371000  | -1.556607000 | 0.010458000  |

Zero-point correction= 0.148660  
 (Hartree/Particle)  
 Thermal correction to Energy= 0.158894  
 Thermal correction to Enthalpy= 0.159838  
 Thermal correction to Gibbs Free Energy= 0.112645  
 Sum of electronic and zero-point Energies= -589.953950  
 Sum of electronic and thermal Energies= -589.943716  
 Sum of electronic and thermal Enthalpies= -589.942771  
 Sum of electronic and thermal Free Energies= -589.989965

E(M06/6-311+G(2d,p))=-590.275558567

**Intermediate II''**

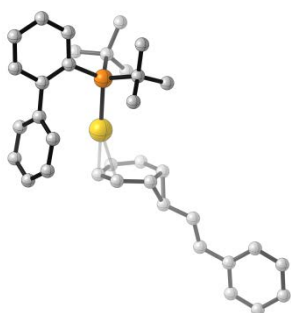

|    |              |              |              |
|----|--------------|--------------|--------------|
| 6  | 1.474512000  | 1.321287000  | 0.245915000  |
| 6  | 0.972932000  | 1.737663000  | 1.462880000  |
| 6  | 1.289169000  | 1.023216000  | 2.695113000  |
| 6  | 2.089271000  | -0.061124000 | 2.676846000  |
| 1  | 1.276593000  | 1.903866000  | -0.656101000 |
| 1  | 0.391174000  | 2.658729000  | 1.519318000  |
| 1  | 0.794675000  | 1.338577000  | 3.611749000  |
| 1  | 2.217705000  | -0.661413000 | 3.576948000  |
| 79 | -0.680094000 | 0.380987000  | 0.392538000  |
| 15 | -2.402894000 | -1.166089000 | -0.069050000 |
| 6  | -1.735597000 | -2.314617000 | -1.416141000 |
| 6  | -2.809444000 | -2.037080000 | 1.572391000  |

|   |              |              |              |
|---|--------------|--------------|--------------|
| 6 | -3.975028000 | -0.439336000 | -0.685538000 |
| 6 | -0.543308000 | -3.088753000 | -0.856239000 |
| 6 | -1.252617000 | -1.404374000 | -2.547897000 |
| 6 | -2.751964000 | -3.296800000 | -1.993121000 |
| 6 | -3.496014000 | -3.393921000 | 1.437038000  |
| 6 | -3.702102000 | -1.080449000 | 2.365163000  |
| 6 | -1.507199000 | -2.230945000 | 2.357624000  |
| 6 | -5.063549000 | -1.305783000 | -0.882426000 |
| 6 | -4.179642000 | 0.947387000  | -0.858003000 |
| 1 | -0.846261000 | -3.850288000 | -0.126501000 |
| 1 | -0.044734000 | -3.610830000 | -1.686603000 |
| 1 | 0.199845000  | -2.427403000 | -0.385575000 |
| 1 | -0.447801000 | -0.727465000 | -2.221510000 |
| 1 | -0.856893000 | -2.032926000 | -3.359442000 |
| 1 | -2.069195000 | -0.798968000 | -2.966252000 |
| 1 | -2.234922000 | -3.924373000 | -2.734419000 |
| 1 | -3.179688000 | -3.967563000 | -1.238309000 |
| 1 | -3.570128000 | -2.786101000 | -2.515778000 |
| 1 | -3.666628000 | -3.793446000 | 2.447885000  |
| 1 | -4.476527000 | -3.335079000 | 0.950599000  |
| 1 | -2.874984000 | -4.123173000 | 0.901990000  |
| 1 | -4.696497000 | -0.959776000 | 1.917061000  |
| 1 | -3.838865000 | -1.488429000 | 3.377631000  |
| 1 | -3.246732000 | -0.083913000 | 2.472654000  |
| 1 | -1.747564000 | -2.726113000 | 3.310442000  |
| 1 | -0.778596000 | -2.862009000 | 1.832910000  |
| 1 | -1.024607000 | -1.271166000 | 2.592664000  |
| 6 | -6.326147000 | -0.835693000 | -1.215127000 |
| 1 | -4.930798000 | -2.377702000 | -0.764740000 |
| 6 | -5.466986000 | 1.403640000  | -1.174359000 |
| 6 | -3.137131000 | 2.006777000  | -0.764127000 |
| 6 | -6.532266000 | 0.532115000  | -1.349981000 |
| 1 | -7.143647000 | -1.539395000 | -1.358612000 |
| 1 | -5.618609000 | 2.475610000  | -1.299192000 |
| 6 | -2.209956000 | 2.190445000  | -1.797105000 |
| 6 | -3.168669000 | 2.929842000  | 0.287410000  |
| 1 | -7.517764000 | 0.921288000  | -1.599251000 |
| 6 | -1.328217000 | 3.268472000  | -1.773408000 |
| 1 | -2.199362000 | 1.496156000  | -2.638153000 |
| 6 | -2.283389000 | 4.005312000  | 0.312939000  |
| 1 | -3.907403000 | 2.807795000  | 1.080703000  |
| 6 | -1.362215000 | 4.178204000  | -0.718012000 |
| 1 | -0.620987000 | 3.405855000  | -2.590478000 |
| 1 | -2.326706000 | 4.720348000  | 1.133303000  |
| 1 | -0.682010000 | 5.028503000  | -0.706573000 |
| 6 | 2.474840000  | 0.246014000  | 0.163761000  |
| 1 | 2.504262000  | -0.327191000 | -0.764016000 |
| 6 | 3.810413000  | 0.455760000  | 0.842050000  |
| 1 | 3.936236000  | 1.411659000  | 1.355994000  |
| 6 | 2.804153000  | -0.488457000 | 1.468131000  |
| 1 | 3.056751000  | -1.546269000 | 1.393396000  |
| 6 | 7.463307000  | 0.003188000  | -0.323848000 |
| 6 | 8.592062000  | 0.834203000  | -0.278623000 |
| 6 | 7.598162000  | -1.261494000 | -0.918041000 |
| 6 | 9.810583000  | 0.423928000  | -0.807629000 |
| 1 | 8.501642000  | 1.818917000  | 0.182004000  |
| 6 | 8.814736000  | -1.671789000 | -1.446388000 |
| 1 | 6.745017000  | -1.938536000 | -0.958307000 |
| 6 | 9.927387000  | -0.831777000 | -1.396192000 |
| 1 | 10.672047000 | 1.088658000  | -0.760792000 |
| 1 | 8.898897000  | -2.658648000 | -1.899820000 |
| 1 | 10.879979000 | -1.159739000 | -1.809071000 |
| 6 | 6.210779000  | 0.493935000  | 0.250659000  |
| 1 | 6.283014000  | 1.462468000  | 0.755163000  |
| 6 | 5.012686000  | -0.108237000 | 0.220008000  |
| 1 | 4.879583000  | -1.071709000 | -0.282007000 |

Zero-point correction= 0.662826  
 (Hartree/Particle)  
 Thermal correction to Energy= 0.700129  
 Thermal correction to Enthalpy= 0.701073  
 Thermal correction to Gibbs Free Energy= 0.592965  
 Sum of electronic and zero-point Energies= -1833.630222  
 Sum of electronic and thermal Energies= -1833.592918  
 Sum of electronic and thermal Enthalpies= -1833.591974  
 Sum of electronic and thermal Free Energies= -1833.700082

E(M06/6-311+G(2d,p))= -1834.70465985

**Intermediate II'**

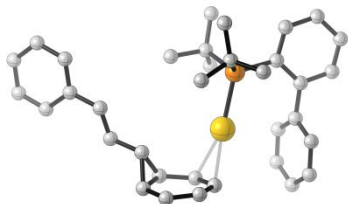

|    |              |              |              |
|----|--------------|--------------|--------------|
| 6  | -0.479518000 | -2.947177000 | -0.591700000 |
| 6  | -2.643360000 | -1.870196000 | 0.406396000  |
| 6  | 0.303052000  | -3.203022000 | 0.518618000  |
| 6  | -1.941507000 | -2.851502000 | -0.497911000 |
| 6  | -0.303801000 | -3.517451000 | 1.802019000  |
| 6  | -2.571854000 | -3.314655000 | 0.839882000  |
| 6  | -1.640163000 | -3.675388000 | 1.907765000  |
| 1  | -0.042420000 | -3.060302000 | -1.585135000 |
| 1  | 1.358158000  | -3.449458000 | 0.375446000  |
| 1  | -2.489086000 | -3.098084000 | -1.407200000 |
| 1  | 0.350733000  | -3.773915000 | 2.632483000  |
| 1  | -3.509891000 | -3.867678000 | 0.786584000  |
| 1  | -2.063551000 | -4.108011000 | 2.813798000  |
| 1  | -1.993956000 | -1.185579000 | 0.961407000  |
| 6  | -4.337516000 | -0.073766000 | 0.243517000  |
| 1  | -3.681261000 | 0.555457000  | 0.853867000  |
| 79 | 0.637023000  | -0.922754000 | 0.085681000  |
| 15 | 1.133031000  | 1.386332000  | 0.286199000  |
| 6  | -0.052149000 | 2.302394000  | -0.869203000 |
| 6  | 0.938286000  | 1.834091000  | 2.124452000  |
| 6  | 2.839831000  | 1.871526000  | -0.195154000 |
| 6  | -1.476764000 | 2.032505000  | -0.390348000 |
| 6  | 0.138943000  | 1.677170000  | -2.251460000 |
| 6  | 0.175775000  | 3.807734000  | -0.986219000 |
| 6  | 0.691166000  | 3.313192000  | 2.411590000  |
| 6  | 2.223558000  | 1.376262000  | 2.816541000  |
| 6  | -0.230272000 | 1.031002000  | 2.704946000  |
| 6  | 3.202445000  | 3.220133000  | -0.042088000 |
| 6  | 3.827069000  | 0.953121000  | -0.615856000 |
| 1  | -1.694098000 | 2.533051000  | 0.563374000  |
| 1  | -2.188874000 | 2.417792000  | -1.136423000 |
| 1  | -1.670819000 | 0.955733000  | -0.274292000 |
| 1  | -0.098270000 | 0.602796000  | -2.253679000 |
| 1  | -0.541079000 | 2.172444000  | -2.960415000 |
| 1  | 1.163336000  | 1.812253000  | -2.626548000 |
| 1  | -0.615350000 | 4.222331000  | -1.628765000 |
| 1  | 0.122861000  | 4.329704000  | -0.023081000 |
| 1  | 1.135129000  | 4.042877000  | -1.463149000 |
| 1  | 0.637860000  | 3.445337000  | 3.502734000  |
| 1  | 1.493984000  | 3.966884000  | 2.050602000  |
| 1  | -0.262666000 | 3.661901000  | 1.994954000  |
| 1  | 3.092716000  | 1.985350000  | 2.536494000  |
| 1  | 2.087316000  | 1.466159000  | 3.904376000  |
| 1  | 2.456003000  | 0.321934000  | 2.599702000  |
| 1  | -0.328144000 | 1.282206000  | 3.771706000  |
| 1  | -1.188749000 | 1.263847000  | 2.223112000  |
| 1  | -0.059697000 | -0.053347000 | 2.632265000  |
| 6  | 4.495579000  | 3.664795000  | -0.279518000 |
| 1  | 2.459885000  | 3.946941000  | 0.275449000  |
| 6  | 5.130144000  | 1.420399000  | -0.838373000 |
| 6  | 3.627866000  | -0.502284000 | -0.859351000 |
| 6  | 5.469357000  | 2.755656000  | -0.675462000 |
| 1  | 4.737831000  | 4.717819000  | -0.149726000 |
| 1  | 5.886584000  | 0.705473000  | -1.160759000 |
| 6  | 2.961085000  | -0.965184000 | -2.000657000 |
| 6  | 4.240148000  | -1.432932000 | -0.012147000 |

|   |              |              |              |
|---|--------------|--------------|--------------|
| 1 | 6.490746000  | 3.083210000  | -0.860776000 |
| 6 | 2.907131000  | -2.328256000 | -2.284583000 |
| 1 | 2.510144000  | -0.246968000 | -2.686472000 |
| 6 | 4.178327000  | -2.796289000 | -0.291506000 |
| 1 | 4.781614000  | -1.077549000 | 0.865643000  |
| 6 | 3.513992000  | -3.247220000 | -1.430148000 |
| 1 | 2.401387000  | -2.670881000 | -3.186639000 |
| 1 | 4.665837000  | -3.506560000 | 0.374626000  |
| 1 | 3.481664000  | -4.311215000 | -1.659816000 |
| 6 | -3.925705000 | -1.317310000 | -0.044222000 |
| 1 | -4.542669000 | -1.985374000 | -0.653207000 |
| 6 | -5.580633000 | 0.565417000  | -0.186824000 |
| 6 | -6.596394000 | -0.118067000 | -0.873352000 |
| 6 | -5.770946000 | 1.926178000  | 0.092662000  |
| 6 | -7.753019000 | 0.540000000  | -1.267767000 |
| 1 | -6.482589000 | -1.178753000 | -1.096901000 |
| 6 | -6.929131000 | 2.585983000  | -0.303219000 |
| 1 | -4.990530000 | 2.469116000  | 0.628762000  |
| 6 | -7.926075000 | 1.895273000  | -0.985953000 |
| 1 | -8.530872000 | -0.008654000 | -1.797147000 |
| 1 | -7.053679000 | 3.643784000  | -0.075871000 |
| 1 | -8.835506000 | 2.407735000  | -1.295332000 |

Zero-point correction= 0.662806  
 (Hartree/Particle)  
 Thermal correction to Energy= 0.700150  
 Thermal correction to Enthalpy= 0.701094  
 Thermal correction to Gibbs Free Energy= 0.592739  
 Sum of electronic and zero-point Energies= -1833.632680  
 Sum of electronic and thermal Energies= -1833.595336  
 Sum of electronic and thermal Enthalpies= -1833.594392  
 Sum of electronic and thermal Free Energies= 1833.702747

E(M06/6-311+G(2d,p))= -1834.70716746

**Intermediate II**

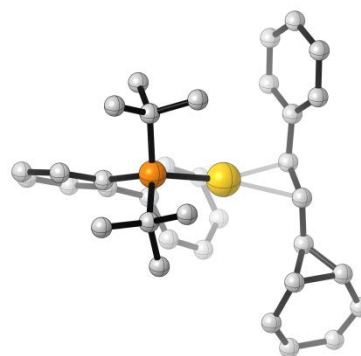

|    |              |              |              |
|----|--------------|--------------|--------------|
| 6  | -0.601443000 | 0.783959000  | -3.974596000 |
| 6  | -1.951520000 | -0.327689000 | -2.096114000 |
| 6  | -1.282674000 | 0.437940000  | -5.087574000 |
| 6  | -1.269299000 | 0.896897000  | -2.675392000 |
| 6  | -2.728755000 | 0.342297000  | -5.083776000 |
| 6  | -2.799512000 | 0.793444000  | -2.669728000 |
| 6  | -3.446129000 | 0.594612000  | -3.969078000 |
| 1  | 0.463362000  | 1.014035000  | -4.022100000 |
| 1  | -0.758966000 | 0.333409000  | -6.036897000 |
| 1  | -0.809740000 | 1.550248000  | -1.930279000 |
| 1  | -3.238812000 | 0.170755000  | -6.030738000 |
| 1  | -3.338616000 | 1.381463000  | -1.926467000 |
| 1  | -4.531154000 | 0.679217000  | -4.014027000 |
| 1  | -1.888050000 | -1.240038000 | -2.693708000 |
| 6  | -1.902189000 | -1.735581000 | -0.022826000 |
| 1  | -1.865230000 | -2.624909000 | -0.662538000 |
| 79 | 0.321854000  | -1.078440000 | -0.000866000 |
| 15 | 2.581652000  | -0.767201000 | 0.612795000  |
| 6  | 3.168746000  | 0.884966000  | -0.089646000 |
| 6  | 2.623556000  | -0.879196000 | 2.511926000  |
| 6  | 3.724853000  | -2.067960000 | -0.004103000 |
| 6  | 2.356485000  | 2.003984000  | 0.559822000  |
| 6  | 2.854143000  | 0.838075000  | -1.586028000 |
| 6  | 4.659240000  | 1.173492000  | 0.080203000  |

|   |              |              |              |
|---|--------------|--------------|--------------|
| 6 | 3.847873000  | -0.250843000 | 3.173139000  |
| 6 | 2.542986000  | -2.367041000 | 2.860869000  |
| 6 | 1.374559000  | -0.193954000 | 3.076047000  |
| 6 | 5.059657000  | -2.020253000 | 0.431671000  |
| 6 | 3.309690000  | -3.170083000 | -0.784036000 |
| 1 | 2.633306000  | 2.159767000  | 1.610951000  |
| 1 | 2.560229000  | 2.943335000  | 0.024524000  |
| 1 | 1.273099000  | 1.817014000  | 0.506199000  |
| 1 | 1.778397000  | 0.705012000  | -1.772863000 |
| 1 | 3.166372000  | 1.788391000  | -2.044422000 |
| 1 | 3.397769000  | 0.030108000  | -2.095979000 |
| 1 | 4.852921000  | 2.187755000  | -0.299766000 |
| 1 | 4.987773000  | 1.146695000  | 1.126313000  |
| 1 | 5.282847000  | 0.486523000  | -0.504986000 |
| 1 | 3.765936000  | -0.401995000 | 4.259964000  |
| 1 | 4.794170000  | -0.706609000 | 2.860043000  |
| 1 | 3.899196000  | 0.831958000  | 2.998807000  |
| 1 | 3.459996000  | -2.914177000 | 2.608033000  |
| 1 | 2.383591000  | -2.462817000 | 3.945117000  |
| 1 | 1.695616000  | -2.862494000 | 2.360832000  |
| 1 | 1.395595000  | -0.286301000 | 4.172246000  |
| 1 | 1.327768000  | 0.875425000  | 2.835485000  |
| 1 | 0.447990000  | -0.669158000 | 2.721670000  |
| 6 | 5.964356000  | -3.030861000 | 0.139183000  |
| 1 | 5.403398000  | -1.176864000 | 1.024421000  |
| 6 | 4.234718000  | -4.189019000 | -1.052719000 |
| 6 | 1.963633000  | -3.366927000 | -1.391451000 |
| 6 | 5.544869000  | -4.130629000 | -0.599869000 |
| 1 | 6.989925000  | -2.959268000 | 0.495977000  |
| 1 | 3.907656000  | -5.039401000 | -1.650498000 |
| 6 | 1.565472000  | -2.632059000 | -2.516370000 |
| 6 | 1.147274000  | -4.412774000 | -0.945245000 |
| 1 | 6.236062000  | -4.939161000 | -0.830437000 |
| 6 | 0.378394000  | -2.938762000 | -3.177277000 |
| 1 | 2.211794000  | -1.837505000 | -2.891821000 |
| 6 | -0.043960000 | -4.713322000 | -1.602310000 |
| 1 | 1.460378000  | -5.001276000 | -0.081351000 |
| 6 | -0.428541000 | -3.980313000 | -2.723011000 |
| 1 | 0.089057000  | -2.365963000 | -4.058370000 |
| 1 | -0.664275000 | -5.535772000 | -1.248067000 |
| 1 | -1.350780000 | -4.224593000 | -3.248692000 |
| 6 | -1.935919000 | -0.506183000 | -0.646044000 |
| 1 | -2.081056000 | 0.402127000  | -0.050403000 |
| 6 | -2.101290000 | -1.997956000 | 1.414191000  |
| 6 | -2.569104000 | -1.027763000 | 2.311281000  |
| 6 | -1.776276000 | -3.270720000 | 1.905920000  |
| 6 | -2.686480000 | -1.320590000 | 3.664253000  |
| 1 | -2.853160000 | -0.039615000 | 1.950256000  |
| 6 | -1.892343000 | -3.560430000 | 3.260199000  |
| 1 | -1.417975000 | -4.030476000 | 1.208731000  |
| 6 | -2.342658000 | -2.583690000 | 4.145251000  |
| 1 | -3.056806000 | -0.559827000 | 4.349514000  |
| 1 | -1.632265000 | -4.552714000 | 3.625127000  |
| 1 | -2.437284000 | -2.808398000 | 5.206185000  |

Zero-point correction= 0.662232  
(Hartree/Particle)  
Thermal correction to Energy= 0.699592  
Thermal correction to Enthalpy= 0.700537  
Thermal correction to Gibbs Free Energy= 0.591961  
Sum of electronic and zero-point Energies= -1833.637938  
Sum of electronic and thermal Energies= -1833.600578  
Sum of electronic and thermal Enthalpies= -1833.599634  
Sum of electronic and thermal Free Energies= -1833.708210

E(M06/6-311+G(2d,p))= -1834.71086892

TS<sub>II-III</sub>

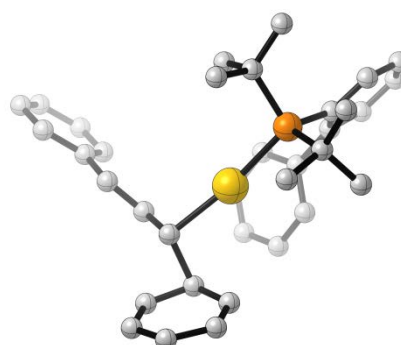

|    |              |              |              |
|----|--------------|--------------|--------------|
| 6  | -0.896597000 | 3.551384000  | 1.187322000  |
| 6  | -2.032609000 | 1.541778000  | -0.049236000 |
| 6  | -1.066756000 | 4.723453000  | 0.531888000  |
| 6  | -1.965931000 | 2.551166000  | 1.234221000  |
| 6  | -2.327633000 | 5.038854000  | -0.074039000 |
| 6  | -3.252783000 | 2.981663000  | 0.751301000  |
| 6  | -3.399176000 | 4.194830000  | 0.041942000  |
| 1  | 0.049631000  | 3.316657000  | 1.677216000  |
| 1  | -0.260053000 | 5.451718000  | 0.481744000  |
| 1  | -1.953412000 | 1.889412000  | 2.105210000  |
| 1  | -2.435460000 | 5.983364000  | -0.604230000 |
| 1  | -4.120856000 | 2.356514000  | 0.945872000  |
| 1  | -4.368022000 | 4.456172000  | -0.376293000 |
| 1  | -2.123935000 | 2.050097000  | -1.015701000 |
| 6  | -3.454289000 | -0.297910000 | -0.925020000 |
| 1  | -3.420864000 | 0.174370000  | -1.912811000 |
| 79 | -0.001472000 | 0.711080000  | -0.185034000 |
| 15 | 2.127682000  | -0.117024000 | -0.802347000 |
| 6  | 1.815525000  | -1.257276000 | -2.284504000 |
| 6  | 3.229153000  | 1.383944000  | -1.186904000 |
| 6  | 3.011926000  | -1.164790000 | 0.427281000  |
| 6  | 1.206902000  | -0.431953000 | -3.417508000 |
| 6  | 0.788246000  | -2.284209000 | -1.799102000 |
| 6  | 3.034788000  | -2.011881000 | -2.808978000 |
| 6  | 4.399650000  | 1.118124000  | -2.132093000 |
| 6  | 3.752576000  | 1.898428000  | 0.154973000  |
| 6  | 2.358069000  | 2.478481000  | -1.811057000 |
| 6  | 4.300340000  | -1.622103000 | 0.103489000  |
| 6  | 2.432326000  | -1.598950000 | 1.638364000  |
| 1  | 1.934368000  | 0.256396000  | -3.868963000 |
| 1  | 0.867967000  | -1.116355000 | -4.209885000 |
| 1  | 0.333138000  | 0.148724000  | -3.085054000 |
| 1  | -0.155030000 | -1.814126000 | -1.481091000 |
| 1  | 0.560356000  | -2.975421000 | -2.624262000 |
| 1  | 1.173648000  | -2.883825000 | -0.962001000 |
| 1  | 2.719624000  | -2.602643000 | -3.682311000 |
| 1  | 3.843800000  | -1.348885000 | -3.137728000 |
| 1  | 3.438384000  | -2.716620000 | -2.071281000 |
| 1  | 4.950446000  | 2.061081000  | -2.269536000 |
| 1  | 5.117640000  | 0.385645000  | -1.744668000 |
| 1  | 4.062977000  | 0.791455000  | -3.124037000 |
| 1  | 4.449306000  | 1.197149000  | 0.631857000  |
| 1  | 4.291440000  | 2.842479000  | -0.015992000 |
| 1  | 2.935232000  | 2.110820000  | 0.861967000  |
| 1  | 2.995157000  | 3.348902000  | -2.028455000 |
| 1  | 1.893275000  | 2.165418000  | -2.754001000 |
| 1  | 1.560423000  | 2.808754000  | -1.130018000 |
| 6  | 5.002082000  | -2.491136000 | 0.927181000  |
| 1  | 4.771366000  | -1.301021000 | -0.821481000 |
| 6  | 3.146349000  | -2.496085000 | 2.445899000  |
| 6  | 1.114722000  | -1.174623000 | 2.187170000  |
| 6  | 4.414663000  | -2.941825000 | 2.103401000  |
| 1  | 6.000211000  | -2.818245000 | 0.642175000  |
| 1  | 2.687023000  | -2.832127000 | 3.375357000  |
| 6  | 0.055105000  | -2.085843000 | 2.242034000  |
| 6  | 0.968360000  | 0.070559000  | 2.809723000  |
| 1  | 4.943975000  | -3.632489000 | 2.757399000  |
| 6  | -1.128217000 | -1.758745000 | 2.900299000  |
| 1  | 0.172478000  | -3.068322000 | 1.783178000  |



|   |              |              |              |
|---|--------------|--------------|--------------|
| 6 | -0.211171000 | 0.393281000  | 3.477276000  |
| 1 | 1.802453000  | 0.773989000  | 2.798415000  |
| 6 | -1.263823000 | -0.519917000 | 3.522549000  |
| 1 | -1.936772000 | -2.487175000 | 2.949346000  |
| 1 | -0.300358000 | 1.356090000  | 3.980503000  |
| 1 | -2.180008000 | -0.272121000 | 4.057472000  |
| 6 | -2.846507000 | 0.335114000  | 0.101280000  |
| 1 | -2.881730000 | -0.091866000 | 1.109848000  |
| 6 | -4.146739000 | -1.579791000 | -0.862523000 |
| 6 | -4.113224000 | -2.413336000 | 0.268452000  |
| 6 | -4.895717000 | -2.004463000 | -1.971413000 |
| 6 | -4.816253000 | -3.609882000 | 0.291374000  |
| 1 | -3.520203000 | -2.123150000 | 1.136182000  |
| 6 | -5.598140000 | -3.203517000 | -1.948280000 |
| 1 | -4.925670000 | -1.372641000 | -2.860079000 |
| 6 | -5.565761000 | -4.011124000 | -0.814485000 |
| 1 | -4.777347000 | -4.239992000 | 1.179138000  |
| 1 | -6.175838000 | -3.507126000 | -2.820335000 |
| 1 | -6.114458000 | -4.951244000 | -0.793458000 |

Zero-point correction= 0.659573  
(Hartree/Particle)  
Thermal correction to Energy= 0.697174  
Thermal correction to Enthalpy= 0.698119  
Thermal correction to Gibbs Free Energy= 0.589577  
Sum of electronic and zero-point Energies= -1833.595693  
Sum of electronic and thermal Energies= -1833.558091  
Sum of electronic and thermal Enthalpies= -1833.557147  
Sum of electronic and thermal Free Energies= -1833.665688

E(M06/6-311+G(2d,p))= -1834.66678314

### Intermediate III

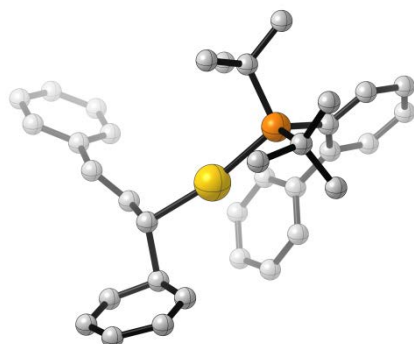

|    |              |              |              |
|----|--------------|--------------|--------------|
| 6  | -1.328421000 | 3.564347000  | 0.649387000  |
| 6  | -2.072015000 | 1.304170000  | -0.258702000 |
| 6  | -1.708418000 | 4.740027000  | 0.071400000  |
| 6  | -2.282253000 | 2.489689000  | 0.885844000  |
| 6  | -3.068061000 | 4.943557000  | -0.259503000 |
| 6  | -3.670930000 | 2.817988000  | 0.649036000  |
| 6  | -4.045490000 | 3.995883000  | 0.031165000  |
| 1  | -0.280200000 | 3.376913000  | 0.890646000  |
| 1  | -0.981408000 | 5.520175000  | -0.139207000 |
| 1  | -2.093153000 | 1.929350000  | 1.813261000  |
| 1  | -3.355158000 | 5.869889000  | -0.755196000 |
| 1  | -4.418148000 | 2.061385000  | 0.884797000  |
| 1  | -5.085762000 | 4.185110000  | -0.220538000 |
| 1  | -2.364075000 | 1.731447000  | -1.229637000 |
| 6  | -3.535570000 | -0.614692000 | -0.854151000 |
| 1  | -3.724001000 | -0.148649000 | -1.827150000 |
| 79 | -0.020060000 | 0.681867000  | -0.333194000 |
| 15 | 2.163173000  | -0.150720000 | -0.824497000 |
| 6  | 1.890707000  | -1.539607000 | -2.085566000 |
| 6  | 3.205321000  | 1.302021000  | -1.472690000 |
| 6  | 3.116107000  | -0.932283000 | 0.546006000  |
| 6  | 1.277214000  | -0.933181000 | -3.346002000 |
| 6  | 0.880026000  | -2.492753000 | -1.438531000 |
| 6  | 3.126499000  | -2.349358000 | -2.468848000 |
| 6  | 4.420677000  | 0.931287000  | -2.318125000 |
| 6  | 3.650978000  | 2.085149000  | -0.236236000 |
| 6  | 2.305283000  | 2.214032000  | -2.313249000 |

|   |              |              |              |
|---|--------------|--------------|--------------|
| 6 | 4.407896000  | -1.415115000 | 0.276735000  |
| 6 | 2.588672000  | -1.124958000 | 1.839748000  |
| 1 | 2.002371000  | -0.326707000 | -3.905520000 |
| 1 | 0.950714000  | -1.749015000 | -4.008334000 |
| 1 | 0.396684000  | -0.313145000 | -3.121618000 |
| 1 | -0.079164000 | -1.998687000 | -1.218887000 |
| 1 | 0.682101000  | -3.322649000 | -2.133658000 |
| 1 | 1.264442000  | -2.928824000 | -0.504720000 |
| 1 | 2.826006000  | -3.091683000 | -3.223682000 |
| 1 | 3.922742000  | -1.738518000 | -2.911610000 |
| 1 | 3.539823000  | -2.902039000 | -1.616446000 |
| 1 | 4.914486000  | 1.860935000  | -2.639902000 |
| 1 | 5.170861000  | 0.349280000  | -1.770118000 |
| 1 | 4.140711000  | 0.383470000  | -3.227491000 |
| 1 | 4.346225000  | 1.517290000  | 0.395886000  |
| 1 | 4.165464000  | 3.001414000  | -0.562110000 |
| 1 | 2.792922000  | 2.391668000  | 0.381953000  |
| 1 | 2.889081000  | 3.097653000  | -2.612874000 |
| 1 | 1.949336000  | 1.728408000  | -3.230221000 |
| 1 | 1.427489000  | 2.564480000  | -1.750438000 |
| 6 | 5.161809000  | -2.077678000 | 1.235485000  |
| 1 | 4.838417000  | -1.281911000 | -0.711687000 |
| 6 | 3.355182000  | -1.815559000 | 2.789399000  |
| 6 | 1.275069000  | -0.631570000 | 2.339977000  |
| 6 | 4.626663000  | -2.288914000 | 2.500706000  |
| 1 | 6.160731000  | -2.431593000 | 0.987759000  |
| 1 | 2.933499000  | -1.963383000 | 3.783452000  |
| 6 | 0.220659000  | -1.525072000 | 2.555475000  |
| 6 | 1.136437000  | 0.693755000  | 2.767446000  |
| 1 | 5.197745000  | -2.814550000 | 3.263939000  |
| 6 | -0.949036000 | -1.102606000 | 3.183598000  |
| 1 | 0.329989000  | -2.565471000 | 2.246012000  |
| 6 | -0.030321000 | 1.114518000  | 3.401159000  |
| 1 | 1.965524000  | 1.389726000  | 2.630485000  |
| 6 | -1.075289000 | 0.216521000  | 3.614149000  |
| 1 | -1.755694000 | -1.814009000 | 3.357275000  |
| 1 | -0.115612000 | 2.144493000  | 3.747254000  |
| 1 | -1.979888000 | 0.540306000  | 4.127739000  |
| 6 | -2.808866000 | 0.074831000  | 0.051018000  |
| 1 | -2.666542000 | -0.334139000 | 1.058574000  |
| 6 | -4.080288000 | -1.955984000 | -0.675591000 |
| 6 | -3.599000000 | -2.846609000 | 0.298696000  |
| 6 | -5.118844000 | -2.391798000 | -1.513778000 |
| 6 | -4.159722000 | -4.108848000 | 0.446916000  |
| 1 | -2.758081000 | -2.551356000 | 0.928333000  |
| 6 | -5.678705000 | -3.654598000 | -1.365102000 |
| 1 | -5.492361000 | -1.716201000 | -2.284453000 |
| 6 | -5.204791000 | -4.518642000 | -0.380458000 |
| 1 | -3.768916000 | -4.786712000 | 1.204893000  |
| 1 | -6.488690000 | -3.967764000 | -2.022524000 |
| 1 | -5.638453000 | -5.510778000 | -0.265322000 |

Zero-point correction= 0.660399  
(Hartree/Particle)  
Thermal correction to Energy= 0.698259  
Thermal correction to Enthalpy= 0.699203  
Thermal correction to Gibbs Free Energy= 0.589553  
Sum of electronic and zero-point Energies= -1833.596387  
Sum of electronic and thermal Energies= -1833.558526  
Sum of electronic and thermal Enthalpies= -1833.557582  
Sum of electronic and thermal Free Energies= -1833.667232

E(M06/6-311+G(2d,p))= -1834.66809433

TS<sub>III-IV</sub>

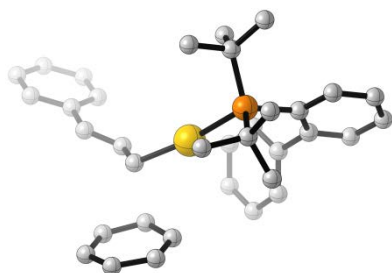

|    |              |              |              |
|----|--------------|--------------|--------------|
| 6  | -0.658629000 | 3.073354000  | 1.159307000  |
| 6  | -1.959279000 | 1.073249000  | -0.261319000 |
| 6  | -0.476160000 | 4.254668000  | 0.480158000  |
| 6  | -1.937986000 | 2.437964000  | 1.181870000  |
| 6  | -1.577075000 | 4.882091000  | -0.129762000 |
| 6  | -3.044758000 | 3.149753000  | 0.648723000  |
| 6  | -2.857052000 | 4.345607000  | -0.030551000 |
| 1  | 0.174000000  | 2.584805000  | 1.667350000  |
| 1  | 0.508185000  | 4.715735000  | 0.426464000  |
| 1  | -2.109053000 | 1.689705000  | 1.958187000  |
| 1  | -1.425698000 | 5.814083000  | -0.672096000 |
| 1  | -4.037139000 | 2.706617000  | 0.720261000  |
| 1  | -3.702861000 | 4.857265000  | -0.483707000 |
| 1  | -2.232603000 | 1.701416000  | -1.118931000 |
| 6  | -4.103040000 | -0.041640000 | -0.664658000 |
| 1  | -4.258118000 | 0.652510000  | -1.497145000 |
| 79 | 0.024270000  | 0.384246000  | -0.350139000 |
| 15 | 2.234446000  | -0.360238000 | -0.905434000 |
| 6  | 2.038547000  | -1.708733000 | -2.221200000 |
| 6  | 3.191121000  | 1.171262000  | -1.514688000 |
| 6  | 3.271171000  | -1.080810000 | 0.440616000  |
| 6  | 1.381378000  | -1.088805000 | -3.452714000 |
| 6  | 1.085380000  | -2.740812000 | -1.611883000 |
| 6  | 3.313356000  | -2.435192000 | -2.643617000 |
| 6  | 4.416836000  | 0.882390000  | -2.377697000 |
| 6  | 3.610187000  | 1.944364000  | -0.262577000 |
| 6  | 2.241052000  | 2.059448000  | -2.324170000 |
| 6  | 4.587004000  | -1.464918000 | 0.131425000  |
| 6  | 2.853616000  | -1.155609000 | 1.787907000  |
| 1  | 2.068610000  | -0.429516000 | -3.999191000 |
| 1  | 1.085623000  | -1.897226000 | -4.138041000 |
| 1  | 0.475910000  | -0.519016000 | -3.197377000 |
| 1  | 0.104318000  | -2.304909000 | -1.371919000 |
| 1  | 0.927429000  | -3.550862000 | -2.339811000 |
| 1  | 1.499754000  | -3.193125000 | -0.699019000 |
| 1  | 3.052481000  | -3.137989000 | -3.449328000 |
| 1  | 4.086417000  | -1.762616000 | -3.034886000 |
| 1  | 3.742340000  | -3.026670000 | -1.825633000 |
| 1  | 4.861922000  | 1.842166000  | -2.681377000 |
| 1  | 5.197725000  | 0.323770000  | -1.847721000 |
| 1  | 4.154901000  | 0.342134000  | -3.296923000 |
| 1  | 4.364452000  | 1.412143000  | 0.331565000  |
| 1  | 4.046677000  | 2.905791000  | -0.572442000 |
| 1  | 2.751441000  | 2.170287000  | 0.389421000  |
| 1  | 2.778503000  | 2.979259000  | -2.600238000 |
| 1  | 1.904133000  | 1.584560000  | -3.253649000 |
| 1  | 1.350493000  | 2.349595000  | -1.747799000 |
| 6  | 5.478048000  | -1.895829000 | 1.104620000  |
| 1  | 4.933683000  | -1.425290000 | -0.896794000 |
| 6  | 3.773579000  | -1.576384000 | 2.759457000  |
| 6  | 1.492987000  | -0.846442000 | 2.303315000  |
| 6  | 5.070713000  | -1.942586000 | 2.432643000  |
| 1  | 6.488637000  | -2.185184000 | 0.822586000  |
| 1  | 3.441816000  | -1.627245000 | 3.796261000  |
| 6  | 0.406901000  | -1.688073000 | 2.035268000  |
| 6  | 1.315433000  | 0.219194000  | 3.192643000  |
| 1  | 5.756990000  | -2.270031000 | 3.211623000  |
| 6  | -0.823850000 | -1.471209000 | 2.649049000  |
| 1  | 0.538401000  | -2.536200000 | 1.362845000  |

|   |              |              |              |
|---|--------------|--------------|--------------|
| 6 | 0.079630000  | 0.445789000  | 3.794189000  |
| 1 | 2.163030000  | 0.866257000  | 3.423180000  |
| 6 | -0.992346000 | -0.403371000 | 3.528659000  |
| 1 | -1.650810000 | -2.151887000 | 2.448334000  |
| 1 | -0.040023000 | 1.277811000  | 4.487038000  |
| 1 | -1.953988000 | -0.241826000 | 4.014853000  |
| 6 | -3.001868000 | 0.140172000  | 0.103895000  |
| 1 | -2.826542000 | -0.495363000 | 0.976925000  |
| 6 | -5.107619000 | -1.084266000 | -0.530355000 |
| 6 | -5.018982000 | -2.116788000 | 0.419134000  |
| 6 | -6.222165000 | -1.055063000 | -1.383590000 |
| 6 | -6.020617000 | -3.070366000 | 0.519986000  |
| 1 | -4.155557000 | -2.173406000 | 1.080720000  |
| 6 | -7.224538000 | -2.011327000 | -1.282107000 |
| 1 | -6.295610000 | -0.263355000 | -2.129975000 |
| 6 | -7.126860000 | -3.022064000 | -0.329376000 |
| 1 | -5.937338000 | -3.862747000 | 1.262119000  |
| 1 | -8.082939000 | -1.971557000 | -1.950549000 |
| 1 | -7.908328000 | -3.775811000 | -0.248327000 |

Zero-point correction= 0.660286  
 (Hartree/Particle)  
 Thermal correction to Energy= 0.697870  
 Thermal correction to Enthalpy= 0.698815  
 Thermal correction to Gibbs Free Energy= 0.588737  
 Sum of electronic and zero-point Energies= -1833.593628  
 Sum of electronic and thermal Energies= -1833.556044  
 Sum of electronic and thermal Enthalpies= -1833.555100  
 Sum of electronic and thermal Free Energies= -1833.665178

E(M06/6-311+G(2d,p))=-1834.66501576

Intermediate IV

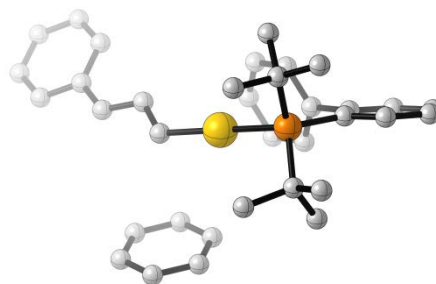

|    |              |              |              |
|----|--------------|--------------|--------------|
| 6  | -1.044512000 | 2.500051000  | 2.278574000  |
| 6  | -1.865176000 | 0.647254000  | -0.692270000 |
| 6  | -0.624661000 | 3.648701000  | 1.609093000  |
| 6  | -2.393152000 | 2.147079000  | 2.277271000  |
| 6  | -1.551439000 | 4.437699000  | 0.930023000  |
| 6  | -3.321762000 | 2.944625000  | 1.610474000  |
| 6  | -2.901001000 | 4.087338000  | 0.933278000  |
| 1  | -0.322583000 | 1.881032000  | 2.812696000  |
| 1  | 0.427197000  | 3.934536000  | 1.619469000  |
| 1  | -2.720169000 | 1.248455000  | 2.801555000  |
| 1  | -1.223577000 | 5.335389000  | 0.407588000  |
| 1  | -4.377697000 | 2.675538000  | 1.622917000  |
| 1  | -3.626541000 | 4.712029000  | 0.413925000  |
| 1  | -2.224990000 | 1.683851000  | -0.762146000 |
| 6  | -4.212215000 | 0.131911000  | -0.769387000 |
| 1  | -4.376261000 | 1.212989000  | -0.828367000 |
| 79 | 0.141986000  | 0.291584000  | -0.590101000 |
| 15 | 2.542428000  | 0.040473000  | -0.733013000 |
| 6  | 2.918862000  | -0.711060000 | -2.429960000 |
| 6  | 3.291124000  | 1.770656000  | -0.476885000 |
| 6  | 3.369381000  | -1.039823000 | 0.513000000  |
| 6  | 2.427879000  | 0.257985000  | -3.505472000 |
| 6  | 2.094628000  | -1.999147000 | -2.500133000 |
| 6  | 4.380876000  | -1.060127000 | -2.696481000 |
| 6  | 4.690468000  | 1.992534000  | -1.045102000 |
| 6  | 3.303725000  | 2.008199000  | 1.035563000  |
| 6  | 2.352320000  | 2.800057000  | -1.114910000 |



|   |              |              |              |
|---|--------------|--------------|--------------|
| 6 | 4.771772000  | -1.126717000 | 0.496225000  |
| 6 | 2.673098000  | -1.688604000 | 1.555225000  |
| 1 | 3.047714000  | 1.163053000  | -3.562237000 |
| 1 | 2.486373000  | -0.241032000 | -4.484617000 |
| 1 | 1.382044000  | 0.559537000  | -3.346657000 |
| 1 | 1.016825000  | -1.805255000 | -2.394329000 |
| 1 | 2.258127000  | -2.476168000 | -3.478545000 |
| 1 | 2.392936000  | -2.721778000 | -1.726639000 |
| 1 | 4.460918000  | -1.439408000 | -3.726534000 |
| 1 | 5.051674000  | -0.196072000 | -2.613215000 |
| 1 | 4.745513000  | -1.852839000 | -2.031679000 |
| 1 | 5.003999000  | 3.018659000  | -0.798602000 |
| 1 | 5.444383000  | 1.319380000  | -0.620714000 |
| 1 | 4.710539000  | 1.901730000  | -2.138861000 |
| 1 | 4.077163000  | 1.420075000  | 1.546158000  |
| 1 | 3.511966000  | 3.071898000  | 1.226148000  |
| 1 | 2.334079000  | 1.771411000  | 1.500261000  |
| 1 | 2.759530000  | 3.805938000  | -0.930146000 |
| 1 | 2.261710000  | 2.676108000  | -2.201249000 |
| 1 | 1.341578000  | 2.760993000  | -0.684309000 |
| 6 | 5.479796000  | -1.807891000 | 1.476712000  |
| 1 | 5.332046000  | -0.639928000 | -0.297087000 |
| 6 | 3.405478000  | -2.357477000 | 2.546066000  |
| 6 | 1.194297000  | -1.755385000 | 1.707456000  |
| 6 | 4.791042000  | -2.420353000 | 2.517124000  |
| 1 | 6.566227000  | -1.850331000 | 1.428276000  |
| 1 | 2.857708000  | -2.850546000 | 3.348944000  |
| 6 | 0.425765000  | -2.600088000 | 0.897889000  |
| 6 | 0.571874000  | -1.083875000 | 2.764522000  |
| 1 | 5.328261000  | -2.949885000 | 3.301982000  |
| 6 | -0.935050000 | -2.766201000 | 1.140789000  |
| 1 | 0.909095000  | -3.145857000 | 0.086506000  |
| 6 | -0.792741000 | -1.238733000 | 2.998227000  |
| 1 | 1.171120000  | -0.443442000 | 3.413661000  |
| 6 | -1.548722000 | -2.084386000 | 2.190281000  |
| 1 | -1.516742000 | -3.440994000 | 0.512608000  |
| 1 | -1.262411000 | -0.710517000 | 3.827681000  |
| 1 | -2.613979000 | -2.216637000 | 2.379304000  |
| 6 | -2.890973000 | -0.288072000 | -0.700900000 |
| 1 | -2.659173000 | -1.351968000 | -0.636324000 |
| 6 | -5.386353000 | -0.675953000 | -0.759735000 |
| 6 | -5.344148000 | -2.085297000 | -0.669710000 |
| 6 | -6.638035000 | -0.028290000 | -0.834890000 |
| 6 | -6.518882000 | -2.812491000 | -0.660742000 |
| 1 | -4.386870000 | -2.599946000 | -0.605646000 |
| 6 | -7.810754000 | -0.762531000 | -0.825423000 |
| 1 | -6.665860000 | 1.058521000  | -0.902507000 |
| 6 | -7.750093000 | -2.153181000 | -0.738605000 |
| 1 | -6.487362000 | -3.897486000 | -0.591999000 |
| 1 | -8.773298000 | -0.259883000 | -0.885864000 |
| 1 | -8.670833000 | -2.733788000 | -0.731336000 |

Zero-point correction= 0.660111  
(Hartree/Particle)  
Thermal correction to Energy= 0.698786  
Thermal correction to Enthalpy= 0.699730  
Thermal correction to Gibbs Free Energy= 0.587937  
Sum of electronic and zero-point Energies= -1833.615261  
Sum of electronic and thermal Energies= -1833.576586  
Sum of electronic and thermal Enthalpies= -1833.575642  
Sum of electronic and thermal Free Energies= -1833.687435

E(M06/6-311+G(2d,p))= -1834.68832615

### Intermediate V

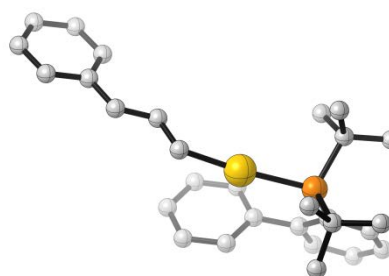

|    |              |              |              |
|----|--------------|--------------|--------------|
| 79 | -1.343559000 | 0.389961000  | 0.642414000  |
| 15 | -3.296393000 | 1.724974000  | 0.151321000  |
| 6  | -2.929957000 | 2.618611000  | -1.479030000 |
| 6  | -4.800671000 | 0.567206000  | 0.070414000  |
| 6  | 0.293519000  | -0.815880000 | 0.820857000  |
| 1  | 0.170717000  | -1.878091000 | 1.076860000  |
| 6  | 1.618703000  | -0.440543000 | 0.658714000  |
| 1  | 1.867427000  | 0.588689000  | 0.393654000  |
| 6  | 2.635471000  | -1.368256000 | 0.856838000  |
| 1  | 2.324117000  | -2.384300000 | 1.117761000  |
| 6  | 4.041227000  | -1.155921000 | 0.772243000  |
| 6  | 4.894407000  | -2.252951000 | 1.023823000  |
| 6  | 4.607672000  | 0.100115000  | 0.456370000  |
| 6  | 6.268400000  | -2.101995000 | 0.963551000  |
| 1  | 4.451744000  | -3.218621000 | 1.265467000  |
| 6  | 5.980219000  | 0.242965000  | 0.396871000  |
| 1  | 3.966407000  | 0.956555000  | 0.258775000  |
| 6  | 6.808960000  | -0.854487000 | 0.651456000  |
| 1  | 6.922252000  | -2.948346000 | 1.160191000  |
| 1  | 6.418276000  | 1.208475000  | 0.154320000  |
| 1  | 7.889506000  | -0.732470000 | 0.604208000  |
| 6  | -3.697780000 | 3.076618000  | 1.340372000  |
| 6  | -4.850464000 | 3.849649000  | 1.119917000  |
| 6  | -2.854212000 | 3.427863000  | 2.416258000  |
| 6  | -5.167279000 | 4.942887000  | 1.914249000  |
| 1  | -5.519678000 | 3.604320000  | 0.299494000  |
| 6  | -3.177963000 | 4.549413000  | 3.193504000  |
| 6  | -4.317494000 | 5.303238000  | 2.953357000  |
| 1  | -6.071537000 | 5.513593000  | 1.711066000  |
| 1  | -2.516841000 | 4.815739000  | 4.017907000  |
| 1  | -4.544253000 | 6.164496000  | 3.579331000  |
| 6  | -1.629600000 | 2.699649000  | 2.846756000  |
| 6  | -0.372546000 | 3.293730000  | 2.693097000  |
| 6  | -1.725136000 | 1.495364000  | 3.554100000  |
| 6  | 0.763932000  | 2.699284000  | 3.236323000  |
| 1  | -0.292772000 | 4.244167000  | 2.164098000  |
| 6  | -0.589186000 | 0.906225000  | 4.106855000  |
| 1  | -2.705423000 | 1.040880000  | 3.704121000  |
| 6  | 0.657018000  | 1.509445000  | 3.952595000  |
| 1  | 1.733707000  | 3.180687000  | 3.117040000  |
| 1  | -0.683457000 | -0.020320000 | 4.671701000  |
| 1  | 1.542471000  | 1.056083000  | 4.395850000  |
| 6  | -5.996034000 | 1.080945000  | -0.727395000 |
| 1  | -6.777030000 | 0.305425000  | -0.715332000 |
| 1  | -6.445655000 | 1.987997000  | -0.306306000 |
| 1  | -5.741303000 | 1.269237000  | -1.778302000 |
| 6  | -5.217231000 | 0.299110000  | 1.517682000  |
| 1  | -5.603902000 | 1.196851000  | 2.017262000  |
| 1  | -6.015879000 | -0.457577000 | 1.521343000  |
| 1  | -4.384582000 | -0.098815000 | 2.117292000  |
| 6  | -4.353669000 | -0.759384000 | -0.551955000 |
| 1  | -5.204208000 | -1.457532000 | -0.532831000 |
| 1  | -4.040769000 | -0.652491000 | -1.597877000 |
| 1  | -3.527125000 | -1.222229000 | 0.005579000  |
| 6  | -2.744384000 | 1.569738000  | -2.573854000 |
| 1  | -3.691670000 | 1.084919000  | -2.845963000 |
| 1  | -2.356961000 | 2.064024000  | -3.477463000 |
| 1  | -2.023718000 | 0.790800000  | -2.284634000 |
| 6  | -1.605312000 | 3.351354000  | -1.247724000 |

|                                              |              |             |              |
|----------------------------------------------|--------------|-------------|--------------|
| 1                                            | -0.789624000 | 2.660357000 | -0.986301000 |
| 1                                            | -1.321220000 | 3.878546000 | -2.171215000 |
| 1                                            | -1.687955000 | 4.103862000 | -0.450011000 |
| 6                                            | -3.967670000 | 3.642693000 | -1.932165000 |
| 1                                            | -3.645447000 | 4.048665000 | -2.903070000 |
| 1                                            | -4.965929000 | 3.211478000 | -2.073645000 |
| 1                                            | -4.047425000 | 4.488326000 | -1.238150000 |
| Zero-point correction=                       |              |             | 0.559400     |
| (Hartree/Particle)                           |              |             |              |
| Thermal correction to Energy=                |              |             | 0.591765     |
| Thermal correction to Enthalpy=              |              |             | 0.592709     |
| Thermal correction to Gibbs Free Energy=     |              |             | 0.494791     |
| Sum of electronic and zero-point Energies=   |              |             | -1601.648822 |
| Sum of electronic and thermal Energies=      |              |             | -1601.616457 |
| Sum of electronic and thermal Enthalpies=    |              |             | -1601.615513 |
| Sum of electronic and thermal Free Energies= |              |             | -1601.713432 |

E(M06/6-311+G(2d,p))= -1602.55313656

#### Intermediate c-VIa

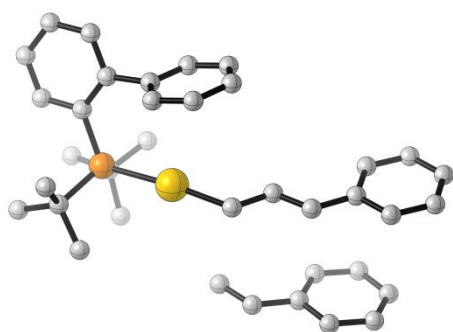

|    |              |              |              |
|----|--------------|--------------|--------------|
| 79 | 0.615878000  | -0.297551000 | -0.459985000 |
| 15 | 2.901623000  | -0.767970000 | 0.167115000  |
| 6  | 2.824108000  | -1.477126000 | 1.923721000  |
| 6  | 3.633924000  | -1.967295000 | -1.113151000 |
| 6  | -1.360452000 | -0.091657000 | -0.953506000 |
| 1  | -1.712709000 | -0.443128000 | -1.933444000 |
| 6  | -1.750739000 | -2.913447000 | -0.087522000 |
| 1  | -1.619506000 | -2.574351000 | 0.940866000  |
| 1  | -0.864867000 | -3.305184000 | -0.584994000 |
| 6  | -4.210513000 | -2.440950000 | -0.161831000 |
| 6  | -5.350418000 | -2.472304000 | -0.981394000 |
| 6  | -4.346154000 | -1.947310000 | 1.147522000  |
| 6  | -6.581822000 | -2.031549000 | -0.513102000 |
| 1  | -5.257499000 | -2.857772000 | -1.997577000 |
| 6  | -5.577219000 | -1.512181000 | 1.617452000  |
| 1  | -3.478192000 | -1.910829000 | 1.805691000  |
| 6  | -6.698924000 | -1.547486000 | 0.788637000  |
| 1  | -7.454328000 | -2.065487000 | -1.163936000 |
| 1  | -5.664757000 | -1.133748000 | 2.635075000  |
| 1  | -7.662591000 | -1.200301000 | 1.158424000  |
| 6  | -2.942093000 | -2.915358000 | -0.705647000 |
| 1  | -2.994449000 | -3.291525000 | -1.730930000 |
| 6  | -2.347678000 | 0.533771000  | -0.199383000 |
| 1  | -2.111918000 | 0.915128000  | 0.796726000  |
| 6  | -3.622651000 | 0.705977000  | -0.718089000 |
| 1  | -3.802812000 | 0.300605000  | -1.719181000 |
| 6  | -4.729307000 | 1.386632000  | -0.120667000 |
| 6  | -5.927959000 | 1.478586000  | -0.856135000 |
| 6  | -4.679509000 | 1.932079000  | 1.180286000  |
| 6  | -7.041526000 | 2.102963000  | -0.316026000 |
| 1  | -5.963605000 | 1.052002000  | -1.858353000 |
| 6  | -5.795089000 | 2.547712000  | 1.716677000  |
| 1  | -3.765059000 | 1.865181000  | 1.767318000  |
| 6  | -6.974489000 | 2.634766000  | 0.970078000  |
| 1  | -7.961701000 | 2.173303000  | -0.891830000 |
| 1  | -5.756506000 | 2.965139000  | 2.720581000  |
| 1  | -7.847781000 | 3.122182000  | 1.399700000  |
| 6  | 4.056995000  | 0.664212000  | 0.298893000  |
| 6  | 5.397629000  | 0.418337000  | 0.642481000  |

|   |              |              |              |
|---|--------------|--------------|--------------|
| 6 | 3.643497000  | 2.005213000  | 0.148835000  |
| 6 | 6.306155000  | 1.446493000  | 0.851514000  |
| 1 | 5.748808000  | -0.602601000 | 0.764217000  |
| 6 | 4.569156000  | 3.031577000  | 0.386672000  |
| 6 | 5.885472000  | 2.765976000  | 0.734717000  |
| 1 | 7.335895000  | 1.211154000  | 1.113976000  |
| 1 | 4.236351000  | 4.063309000  | 0.275175000  |
| 1 | 6.580934000  | 3.585589000  | 0.906683000  |
| 6 | 2.293165000  | 2.467650000  | -0.274898000 |
| 6 | 1.449632000  | 3.100784000  | 0.643846000  |
| 6 | 1.918473000  | 2.431095000  | -1.622861000 |
| 6 | 0.256725000  | 3.685335000  | 0.224829000  |
| 1 | 1.748369000  | 3.158297000  | 1.691344000  |
| 6 | 0.727842000  | 3.020847000  | -2.042607000 |
| 1 | 2.584308000  | 1.963145000  | -2.349291000 |
| 6 | -0.102699000 | 3.654252000  | -1.120604000 |
| 1 | -0.383092000 | 4.186075000  | 0.950443000  |
| 1 | 0.457912000  | 2.999380000  | -3.097597000 |
| 1 | -1.024971000 | 4.129634000  | -1.451551000 |
| 6 | 4.819389000  | -2.804210000 | -0.640661000 |
| 1 | 5.122419000  | -3.468913000 | -1.464014000 |
| 1 | 5.699522000  | -2.205620000 | -0.377983000 |
| 1 | 4.559326000  | -3.442489000 | 0.213822000  |
| 6 | 4.041855000  | -1.116396000 | -2.316951000 |
| 1 | 4.873847000  | -0.437445000 | -2.089240000 |
| 1 | 4.366251000  | -1.783762000 | -3.129280000 |
| 1 | 3.200867000  | -0.517704000 | -2.698535000 |
| 6 | 2.528998000  | -2.929395000 | -1.560789000 |
| 1 | 2.931063000  | -3.577409000 | -2.354325000 |
| 1 | 2.184078000  | -3.582286000 | -0.749293000 |
| 1 | 1.657696000  | -2.399300000 | -1.971196000 |
| 6 | 2.008910000  | -2.768093000 | 1.886553000  |
| 1 | 2.546264000  | -3.582465000 | 1.382435000  |
| 1 | 1.812480000  | -3.093899000 | 2.919144000  |
| 1 | 1.037412000  | -2.629482000 | 1.390213000  |
| 6 | 2.071860000  | -0.426972000 | 2.746418000  |
| 1 | 1.063669000  | -0.234858000 | 2.348811000  |
| 1 | 1.966680000  | -0.789165000 | 3.780509000  |
| 1 | 2.613836000  | 0.529148000  | 2.784727000  |
| 6 | 4.161595000  | -1.749471000 | 2.607716000  |
| 1 | 3.954998000  | -2.191193000 | 3.594450000  |
| 1 | 4.792011000  | -2.459470000 | 2.058749000  |
| 1 | 4.735777000  | -0.831161000 | 2.779386000  |

|                                              |  |  |              |
|----------------------------------------------|--|--|--------------|
| Zero-point correction=                       |  |  | 0.693875     |
| (Hartree/Particle)                           |  |  |              |
| Thermal correction to Energy=                |  |  | 0.734397     |
| Thermal correction to Enthalpy=              |  |  | 0.735342     |
| Thermal correction to Gibbs Free Energy=     |  |  | 0.619721     |
| Sum of electronic and zero-point Energies=   |  |  | -1910.923046 |
| Sum of electronic and thermal Energies=      |  |  | -1910.882523 |
| Sum of electronic and thermal Enthalpies=    |  |  | -1910.881579 |
| Sum of electronic and thermal Free Energies= |  |  | -1910.997200 |

E(M06/6-311+G(2d,p))= -1912.05193883

#### Intermediate t-VIa

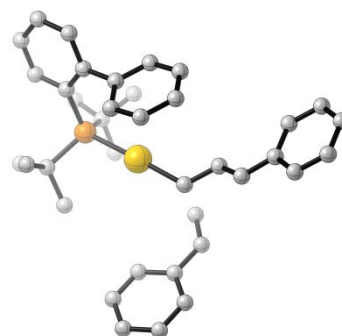

|    |              |              |              |
|----|--------------|--------------|--------------|
| 79 | -0.014779000 | 0.124418000  | -0.191625000 |
| 15 | -2.368324000 | -0.310259000 | 0.126883000  |
| 6  | -2.743517000 | 0.233543000  | 1.904096000  |

|   |              |              |              |
|---|--------------|--------------|--------------|
| 6 | -3.335663000 | 0.664296000  | -1.185568000 |
| 6 | 1.939946000  | 0.663283000  | -0.407002000 |
| 1 | 2.195259000  | 1.528165000  | -1.036624000 |
| 6 | 1.416378000  | 2.770581000  | 2.259774000  |
| 1 | 2.241968000  | 2.252829000  | 2.745876000  |
| 1 | 0.443374000  | 2.699933000  | 2.748723000  |
| 6 | 1.601283000  | 3.454250000  | 1.124223000  |
| 6 | 3.055276000  | 0.017006000  | 0.113527000  |
| 1 | 2.930520000  | -0.848748000 | 0.765985000  |
| 6 | 4.326514000  | 0.410699000  | -0.274956000 |
| 1 | 4.390790000  | 1.302169000  | -0.907519000 |
| 6 | 5.564142000  | -0.234866000 | 0.022339000  |
| 6 | 6.750686000  | 0.323689000  | -0.497281000 |
| 6 | 5.639972000  | -1.411761000 | 0.799677000  |
| 6 | 7.975264000  | -0.271465000 | -0.248055000 |
| 1 | 6.688638000  | 1.230269000  | -1.098315000 |
| 6 | 6.865670000  | -2.000619000 | 1.045388000  |
| 1 | 4.732305000  | -1.857148000 | 1.202938000  |
| 6 | 8.031401000  | -1.432776000 | 0.522144000  |
| 1 | 8.887728000  | 0.161754000  | -0.651318000 |
| 1 | 6.923553000  | -2.907623000 | 1.642959000  |
| 1 | 8.992821000  | -1.905142000 | 0.716269000  |
| 6 | -2.934855000 | -2.064694000 | 0.040521000  |
| 6 | -4.296189000 | -2.341315000 | 0.254230000  |
| 6 | -2.055578000 | -3.154833000 | -0.145193000 |
| 6 | -4.786819000 | -3.638939000 | 0.307866000  |
| 1 | -4.999951000 | -1.526826000 | 0.403370000  |
| 6 | -2.564774000 | -4.458811000 | -0.058062000 |
| 6 | -3.910651000 | -4.708162000 | 0.165177000  |
| 1 | -5.849240000 | -3.808760000 | 0.472229000  |
| 1 | -1.874751000 | -5.291320000 | -0.193356000 |
| 1 | -4.273516000 | -5.733102000 | 0.217512000  |
| 6 | -0.605588000 | -3.066341000 | -0.468466000 |
| 6 | 0.343702000  | -3.542765000 | 0.442061000  |
| 6 | -0.175945000 | -2.645735000 | -1.732393000 |
| 6 | 1.692955000  | -3.591324000 | 0.100162000  |
| 1 | 0.012908000  | -3.892578000 | 1.420927000  |
| 6 | 1.172804000  | -2.701314000 | -2.077193000 |
| 1 | -0.912640000 | -2.295505000 | -2.456729000 |
| 6 | 2.110560000  | -3.174099000 | -1.161626000 |
| 1 | 2.417539000  | -3.972656000 | 0.819089000  |
| 1 | 1.488735000  | -2.381227000 | -3.069393000 |
| 1 | 3.165410000  | -3.217971000 | -1.431485000 |
| 6 | -4.788493000 | 0.974212000  | -0.837557000 |
| 1 | -5.238122000 | 1.521644000  | -1.680063000 |
| 1 | -5.397158000 | 0.076026000  | -0.680671000 |
| 1 | -4.872859000 | 1.616640000  | 0.048700000  |
| 6 | -3.274735000 | -0.161742000 | -2.470715000 |
| 1 | -3.826789000 | -1.107421000 | -2.391561000 |
| 1 | -3.723904000 | 0.421036000  | -3.288762000 |
| 1 | -2.237830000 | -0.389325000 | -2.760007000 |
| 6 | -2.607864000 | 1.988863000  | -1.436105000 |
| 1 | -3.144122000 | 2.541347000  | -2.223220000 |
| 1 | -2.573120000 | 2.631814000  | -0.547367000 |
| 1 | -1.575843000 | 1.832322000  | -1.781263000 |
| 6 | -2.467962000 | 1.733520000  | 2.015587000  |
| 1 | -3.241982000 | 2.336295000  | 1.519992000  |
| 1 | -2.464243000 | 2.015267000  | 3.080511000  |
| 1 | -1.490322000 | 2.010283000  | 1.593713000  |
| 6 | -1.740380000 | -0.527183000 | 2.776640000  |
| 1 | -0.699290000 | -0.269810000 | 2.528969000  |
| 1 | -1.914991000 | -0.268200000 | 3.832067000  |
| 1 | -1.855716000 | -1.617008000 | 2.680797000  |
| 6 | -4.148692000 | -0.057178000 | 2.425789000  |
| 1 | -4.240431000 | 0.388432000  | 3.428121000  |
| 1 | -4.940625000 | 0.375784000  | 1.802776000  |
| 1 | -4.336811000 | -1.131936000 | 2.534601000  |
| 6 | 0.574308000  | 4.185022000  | 0.374573000  |
| 6 | -0.634195000 | 4.598476000  | 0.954696000  |
| 6 | 0.798134000  | 4.476083000  | -0.977959000 |
| 6 | -1.594403000 | 5.257685000  | 0.196799000  |
| 1 | -0.814680000 | 4.418778000  | 2.014779000  |
| 6 | -0.165950000 | 5.129032000  | -1.739316000 |
| 1 | 1.744861000  | 4.181053000  | -1.433572000 |
| 6 | -1.367423000 | 5.520133000  | -1.154263000 |
| 1 | -2.524576000 | 5.577274000  | 0.665311000  |

|   |              |             |              |
|---|--------------|-------------|--------------|
| 1 | 0.026672000  | 5.342230000 | -2.789758000 |
| 1 | -2.121167000 | 6.039139000 | -1.744256000 |
| 1 | 2.598115000  | 3.459987000 | 0.672810000  |

Zero-point correction= 0.694799  
(Hartree/Particle)  
Thermal correction to Energy= 0.735242  
Thermal correction to Enthalpy= 0.736186  
Thermal correction to Gibbs Free Energy= 0.620165  
Sum of electronic and zero-point Energies= -1910.919075  
Sum of electronic and thermal Energies= -1910.878632  
Sum of electronic and thermal Enthalpies= -1910.877688  
Sum of electronic and thermal Free Energies= -1910.993709

E(M06/6-311+G(2d,p))= -1912.04940280

#### Transition state TS<sub>c-(VIa-VIIa)</sub>

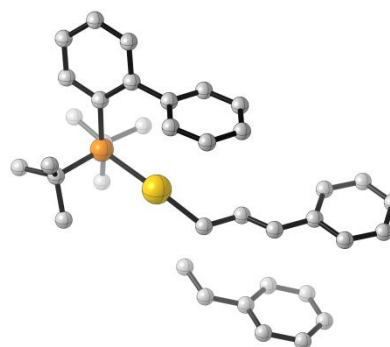

|    |              |              |              |
|----|--------------|--------------|--------------|
| 79 | -1.424985000 | 0.268381000  | 0.185890000  |
| 15 | -3.333162000 | 1.712268000  | 0.054745000  |
| 6  | -3.073270000 | 2.758612000  | -1.504108000 |
| 6  | -4.894368000 | 0.621724000  | -0.007617000 |
| 6  | 0.221859000  | -0.999442000 | 0.149643000  |
| 1  | 0.135154000  | -2.005971000 | 0.578352000  |
| 6  | -0.119506000 | -1.600221000 | -2.011054000 |
| 1  | 0.339816000  | -0.701126000 | -2.421489000 |
| 1  | -1.207191000 | -1.623286000 | -2.023501000 |
| 6  | 1.996713000  | -2.954249000 | -1.884917000 |
| 6  | 2.531382000  | -4.170790000 | -1.418921000 |
| 6  | 2.885357000  | -1.963075000 | -2.344579000 |
| 6  | 3.900180000  | -4.388222000 | -1.406986000 |
| 1  | 1.848948000  | -4.941817000 | -1.060254000 |
| 6  | 4.254681000  | -2.187694000 | -2.343054000 |
| 1  | 2.497749000  | -1.016916000 | -2.720658000 |
| 6  | 4.765505000  | -3.394491000 | -1.867393000 |
| 1  | 4.298039000  | -5.332011000 | -1.038497000 |
| 1  | 4.931173000  | -1.413156000 | -2.700855000 |
| 1  | 5.841144000  | -3.563022000 | -1.857834000 |
| 6  | 0.568877000  | -2.763792000 | -1.820423000 |
| 1  | -0.005596000 | -3.641470000 | -1.513131000 |
| 6  | 1.545359000  | -0.491603000 | 0.148300000  |
| 1  | 1.718669000  | 0.508119000  | -0.259814000 |
| 6  | 2.585333000  | -1.205750000 | 0.676944000  |
| 1  | 2.363896000  | -2.218037000 | 1.030704000  |
| 6  | 3.954723000  | -0.775547000 | 0.841029000  |
| 6  | 4.900630000  | -1.714076000 | 1.288238000  |
| 6  | 4.388654000  | 0.525220000  | 0.523942000  |
| 6  | 6.241161000  | -1.370985000 | 1.405111000  |
| 1  | 4.568784000  | -2.722828000 | 1.535351000  |
| 6  | 5.725940000  | 0.865022000  | 0.645375000  |
| 1  | 3.672011000  | 1.271916000  | 0.184867000  |
| 6  | 6.655325000  | -0.081064000 | 1.084304000  |
| 1  | 6.963218000  | -2.107994000 | 1.751451000  |
| 1  | 6.051591000  | 1.874186000  | 0.399519000  |
| 1  | 7.704973000  | 0.192596000  | 1.176923000  |
| 6  | -3.573382000 | 2.947124000  | 1.403474000  |
| 6  | -4.739086000 | 3.730052000  | 1.380712000  |
| 6  | -2.613294000 | 3.206441000  | 2.405902000  |
| 6  | -4.963221000 | 4.748531000  | 2.296632000  |
| 1  | -5.495684000 | 3.546442000  | 0.622546000  |
| 6  | -2.844930000 | 4.256736000  | 3.306478000  |

|   |              |              |              |   |              |              |              |
|---|--------------|--------------|--------------|---|--------------|--------------|--------------|
| 6 | -4.000964000 | 5.022039000  | 3.261810000  | 1 | 2.246620000  | 1.257104000  | -0.652564000 |
| 1 | -5.883160000 | 5.328068000  | 2.248902000  | 6 | 1.743296000  | 2.114540000  | 1.867457000  |
| 1 | -2.094575000 | 4.452251000  | 4.072184000  | 1 | 2.137480000  | 1.405154000  | 2.591840000  |
| 1 | -4.151272000 | 5.822100000  | 3.984484000  | 1 | 0.683667000  | 2.348184000  | 1.957305000  |
| 6 | -1.352481000 | 2.446943000  | 2.632376000  | 6 | 2.580093000  | 2.857193000  | 1.094422000  |
| 6 | -0.116372000 | 3.063235000  | 2.411282000  | 6 | 2.818109000  | -0.336619000 | 0.615906000  |
| 6 | -1.375648000 | 1.167023000  | 3.199719000  | 1 | 2.522395000  | -1.028267000 | 1.408460000  |
| 6 | 1.070382000  | 2.411721000  | 2.739093000  | 6 | 4.034050000  | -0.454408000 | 0.10552000   |
| 1 | -0.089144000 | 4.069899000  | 1.992482000  | 1 | 4.279451000  | 0.288277000  | -0.755810000 |
| 6 | -0.189379000 | 0.523388000  | 3.544956000  | 6 | 5.036318000  | -1.475690000 | 0.222941000  |
| 1 | -2.335311000 | 0.685551000  | 3.393035000  | 6 | 6.217660000  | -1.416069000 | -0.536230000 |
| 6 | 1.036603000  | 1.144555000  | 3.316245000  | 6 | 4.881142000  | -2.523264000 | 1.150224000  |
| 1 | 2.023907000  | 2.909925000  | 2.568315000  | 6 | 7.217378000  | -2.364579000 | -0.372307000 |
| 1 | -0.225919000 | -0.465009000 | 4.001685000  | 1 | 6.339665000  | -0.610960000 | -1.261209000 |
| 1 | 1.963554000  | 0.643089000  | 3.591633000  | 6 | 5.882647000  | -3.466754000 | 1.313824000  |
| 6 | -6.105673000 | 1.210311000  | -0.727532000 | 1 | 3.971756000  | -2.598358000 | 1.744531000  |
| 1 | -6.926246000 | 0.478789000  | -0.670289000 | 6 | 7.052063000  | -3.390634000 | 0.554822000  |
| 1 | -6.476948000 | 2.138508000  | -0.278310000 | 1 | 8.126815000  | -2.306651000 | -0.967252000 |
| 1 | -5.908260000 | 1.391210000  | -1.791952000 | 1 | 5.754463000  | -4.270232000 | 2.036810000  |
| 6 | -5.257020000 | 0.298245000  | 1.442914000  | 1 | 7.833177000  | -4.137464000 | 0.686467000  |
| 1 | -5.623789000 | 1.175431000  | 1.990719000  | 6 | -3.327703000 | -1.482406000 | -0.409794000 |
| 1 | -6.054990000 | -0.459164000 | 1.447689000  | 6 | -4.725710000 | -1.618687000 | -0.378270000 |
| 1 | -4.402841000 | -0.120198000 | 1.996802000  | 6 | -2.561456000 | -2.566814000 | -0.889535000 |
| 6 | -4.527200000 | -0.691237000 | -0.709616000 | 6 | -5.362090000 | -2.786009000 | -0.776765000 |
| 1 | -5.414504000 | -1.342303000 | -0.718519000 | 1 | -5.341983000 | -0.796366000 | -0.024003000 |
| 1 | -4.217994000 | -0.544101000 | -1.753057000 | 6 | -3.219661000 | -3.748990000 | -1.258126000 |
| 1 | -3.722922000 | -1.227483000 | -0.186235000 | 6 | -4.600747000 | -3.867659000 | -1.203942000 |
| 6 | -2.993860000 | 1.819565000  | -2.707048000 | 1 | -6.447909000 | -2.849943000 | -0.740721000 |
| 1 | -3.960829000 | 1.352299000  | -2.935807000 | 1 | -2.617142000 | -4.584199000 | -1.614548000 |
| 1 | -2.692468000 | 2.400062000  | -3.592167000 | 1 | -5.079828000 | -4.797589000 | -1.505215000 |
| 1 | -2.246958000 | 1.024374000  | -2.560502000 | 6 | -1.086203000 | -2.577351000 | -1.085897000 |
| 6 | -1.717780000 | 3.444797000  | -1.315665000 | 6 | -0.277919000 | -3.403178000 | -0.298185000 |
| 1 | -0.901217000 | 2.717802000  | -1.187504000 | 6 | -0.505952000 | -1.886223000 | -2.156266000 |
| 1 | -1.496314000 | 4.049371000  | -2.208204000 | 6 | 1.082327000  | -3.531290000 | -0.569535000 |
| 1 | -1.715200000 | 4.121644000  | -0.449122000 | 1 | -0.728429000 | -3.963244000 | 0.522396000  |
| 6 | -4.124063000 | 3.833596000  | -1.763808000 | 6 | 0.852255000  | -2.022946000 | -2.434090000 |
| 1 | -3.866990000 | 4.349494000  | -2.701361000 | 1 | -1.134640000 | -1.262160000 | -2.793353000 |
| 1 | -5.134645000 | 3.424986000  | -1.879774000 | 6 | 1.648774000  | -2.848093000 | -1.643191000 |
| 1 | -4.142097000 | 4.591450000  | -0.970796000 | 1 | 1.696343000  | -4.185648000 | 0.048046000  |
|   |              |              |              | 1 | 1.285976000  | -1.493831000 | -3.281873000 |
|   |              |              |              | 1 | 2.707460000  | -2.967146000 | -1.870171000 |
|   |              |              |              | 6 | -4.785565000 | 1.923211000  | -0.061863000 |
|   |              |              |              | 1 | -5.131275000 | 2.784637000  | -0.653469000 |
|   |              |              |              | 1 | -5.534788000 | 1.132139000  | -0.184246000 |
|   |              |              |              | 1 | -4.775640000 | 2.236299000  | 0.989874000  |
|   |              |              |              | 6 | -3.449790000 | 1.197835000  | -2.049794000 |
|   |              |              |              | 1 | -4.179558000 | 0.409909000  | -2.275537000 |
|   |              |              |              | 1 | -3.745144000 | 2.098975000  | -2.607731000 |
|   |              |              |              | 1 | -2.468709000 | 0.879571000  | -2.433505000 |
|   |              |              |              | 6 | -2.472481000 | 2.741919000  | -0.375052000 |
|   |              |              |              | 1 | -2.925772000 | 3.609459000  | -0.879105000 |
|   |              |              |              | 1 | -2.331055000 | 3.008838000  | 0.681293000  |
|   |              |              |              | 1 | -1.483091000 | 2.569866000  | -0.823139000 |
|   |              |              |              | 6 | -2.485785000 | 1.217377000  | 2.828968000  |
|   |              |              |              | 1 | -3.093120000 | 2.090169000  | 2.553141000  |
|   |              |              |              | 1 | -2.564368000 | 1.095552000  | 3.919896000  |
|   |              |              |              | 1 | -1.432293000 | 1.435935000  | 2.595874000  |
|   |              |              |              | 6 | -2.145875000 | -1.247759000 | 2.669712000  |
|   |              |              |              | 1 | -1.069192000 | -1.111594000 | 2.485855000  |
|   |              |              |              | 1 | -2.296528000 | -1.342743000 | 3.755674000  |
|   |              |              |              | 1 | -2.456470000 | -2.195830000 | 2.207323000  |
|   |              |              |              | 6 | -4.432976000 | -0.303726000 | 2.520812000  |
|   |              |              |              | 1 | -4.512912000 | -0.318113000 | 3.618268000  |
|   |              |              |              | 1 | -5.104031000 | 0.482424000  | 2.154498000  |
|   |              |              |              | 1 | -4.798964000 | -1.271943000 | 2.158000000  |
|   |              |              |              | 6 | 2.192289000  | 3.915704000  | 0.178757000  |
|   |              |              |              | 6 | 0.852755000  | 4.294603000  | -0.011888000 |
|   |              |              |              | 6 | 3.188455000  | 4.560422000  | -0.571107000 |
|   |              |              |              | 6 | 0.524825000  | 5.282004000  | -0.929073000 |
|   |              |              |              | 1 | 0.062370000  | 3.810123000  | 0.561343000  |
|   |              |              |              | 6 | 2.859160000  | 5.556688000  | -1.481105000 |
|   |              |              |              | 1 | 4.229696000  | 4.269744000  | -0.426960000 |
|   |              |              |              | 6 | 1.526263000  | 5.917541000  | -1.664629000 |
|   |              |              |              | 1 | -0.518588000 | 5.560452000  | -1.070758000 |
|   |              |              |              | 1 | 3.643345000  | 6.051997000  | -2.050740000 |
|   |              |              |              | 1 | 1.265650000  | 6.695260000  | -2.380321000 |

Zero-point correction= 0.694297  
(Hartree/Particle)  
Thermal correction to Energy= 0.733708  
Thermal correction to Enthalpy= 0.734652  
Thermal correction to Gibbs Free Energy= 0.621923  
Sum of electronic and zero-point Energies= -1910.919092  
Sum of electronic and thermal Energies= -1910.879680  
Sum of electronic and thermal Enthalpies= -1910.878736  
Sum of electronic and thermal Free Energies= -1910.991465

E(M06/6-311+G(2d,p))= -1912.04773405  
E(PBE/6-311+G(2d,p))= -1911.144414  
E(PBE-D3(BJ)/6-311+G(2d,p))= -1911.28439877

#### Transition state TS<sub>t</sub>(VIa-VIIa)

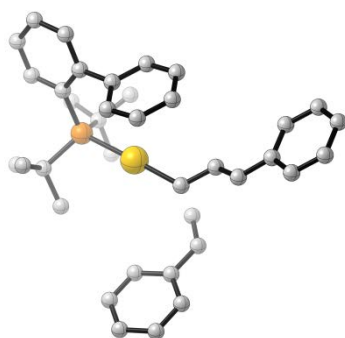

|    |              |              |              |
|----|--------------|--------------|--------------|
| 79 | -0.194591000 | 0.294931000  | 0.168721000  |
| 15 | -2.582289000 | 0.046300000  | 0.301386000  |
| 6  | -2.970497000 | -0.065158000 | 2.153918000  |
| 6  | -3.395688000 | 1.533274000  | -0.558929000 |
| 6  | 1.857242000  | 0.598924000  | 0.135266000  |

1 3.646090000 2.616606000 1.113553000

Zero-point correction= 0.695008  
(Hartree/Particle)

Thermal correction to Energy= 0.734448  
Thermal correction to Enthalpy= 0.735392  
Thermal correction to Gibbs Free Energy= 0.622012

Sum of electronic and zero-point Energies= -1910.913301  
Sum of electronic and thermal Energies= -1910.873862  
Sum of electronic and thermal Enthalpies= -1910.872917  
Sum of electronic and thermal Free Energies= -1910.986297

E(M06/6-311+G(2d,p))= -1912.04286925  
E(PBE/6-311+G(2d,p))= -1911.142374  
E(PBE-D3(BJ)/6-311+G(2d,p))= -1911.27929964

**Intermediate c-VIIa**

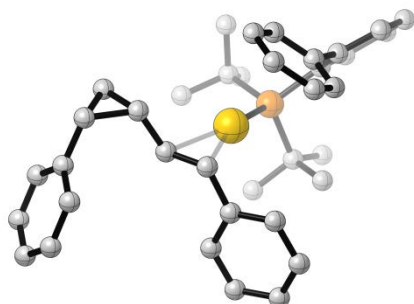

79 0.013347000 -0.019980000 -0.179152000  
15 2.006250000 -1.035932000 0.606882000  
6 2.075696000 -0.573841000 2.444145000  
6 1.926624000 -2.900107000 0.267402000  
6 -2.569790000 -0.409608000 -1.999919000  
1 -2.166041000 0.178516000 -2.824886000  
6 -2.696265000 -1.899259000 -2.194912000  
1 -2.540874000 -2.517367000 -1.309008000  
1 -2.311454000 -2.323947000 -3.119860000  
6 -4.948616000 -1.100324000 -1.156701000  
6 -5.621277000 0.076465000 -0.806783000  
6 -5.245088000 -2.274229000 -0.462401000  
6 -6.561174000 0.080069000 0.217431000  
1 -5.393698000 0.999400000 -1.342877000  
6 -6.190172000 -2.274408000 0.562193000  
1 -4.732626000 -3.198620000 -0.729919000  
6 -6.847752000 -1.097631000 0.906790000  
1 -7.071600000 1.005326000 0.481224000  
1 -6.411063000 -3.199892000 1.092222000  
1 -7.583267000 -1.095972000 1.709684000  
6 -3.928573000 -1.067126000 -2.244823000  
1 -4.322713000 -0.857349000 -3.240934000  
6 -2.309945000 0.123359000 -0.657592000  
1 -2.699904000 -0.467957000 0.176655000  
6 -1.828391000 1.390382000 -0.411959000  
1 -1.554299000 2.007204000 -1.275829000  
6 -1.834980000 2.085535000 0.886736000  
6 -1.206603000 3.334439000 0.976433000  
6 -2.428012000 1.543763000 2.036610000  
6 -1.149457000 4.016918000 2.186319000  
1 -0.754426000 3.763320000 0.080701000  
6 -2.363928000 2.223928000 3.245527000  
1 -2.952367000 0.588934000 1.984600000  
6 -1.720789000 3.459255000 3.326892000  
1 -0.656468000 4.986239000 2.238489000  
1 -2.829538000 1.793024000 4.130449000  
1 -1.676336000 3.990146000 4.276225000  
6 3.558364000 -0.373816000 -0.122958000  
6 4.781330000 -0.890265000 0.335431000  
6 3.582278000 0.704145000 -1.035290000  
6 5.998475000 -0.345951000 -0.051340000  
1 4.792205000 -1.735069000 1.019259000  
6 4.819748000 1.260061000 -1.388332000

6 6.016348000 0.751927000 -0.903385000  
1 6.926475000 -0.773633000 0.323003000  
1 4.828851000 2.099896000 -2.082843000  
1 6.959678000 1.204945000 -1.202953000  
6 2.401412000 1.296100000 -1.719862000  
6 2.047466000 2.629790000 -1.489020000  
6 1.728279000 0.581463000 -2.720523000  
6 1.042670000 3.236324000 -2.239823000  
1 2.577315000 3.196180000 -0.721677000  
6 0.730136000 1.191306000 -3.476351000  
1 2.019089000 -0.449553000 -2.926976000  
6 0.385482000 2.520870000 -3.238559000  
1 0.785644000 4.278425000 -2.053536000  
1 0.231387000 0.628178000 -4.264332000  
1 -0.387214000 3.001645000 -3.836956000  
6 2.793032000 -3.757177000 1.185836000  
1 2.676449000 -4.808982000 0.884142000  
1 3.861081000 -3.521124000 1.116260000  
1 2.482661000 -3.682761000 2.235472000  
6 2.352925000 -3.099174000 -1.187145000  
1 3.405834000 -2.838528000 -1.356498000  
1 2.223700000 -4.159678000 -1.449078000  
1 1.734950000 -2.510384000 -1.881883000  
6 0.472530000 -3.355047000 0.413424000  
1 0.412789000 -4.424842000 0.163322000  
1 0.093517000 -3.233885000 1.435901000  
1 -0.195399000 -2.808910000 -0.268406000  
6 0.849647000 -1.173521000 3.132594000  
1 0.921971000 -2.265387000 3.227291000  
1 0.776268000 -0.757144000 4.148288000  
1 -0.084689000 -0.930341000 2.604216000  
6 1.989731000 0.954539000 2.487902000  
1 1.061862000 1.335622000 2.035009000  
1 2.008402000 1.282365000 3.538199000  
1 2.840139000 1.429209000 1.977489000  
6 3.333384000 -1.002164000 3.196996000  
1 3.212208000 -0.705923000 4.249716000  
1 3.500885000 -2.085527000 3.181176000  
1 4.233969000 -0.500363000 2.823313000

Zero-point correction= 0.697400  
(Hartree/Particle)

Thermal correction to Energy= 0.736660  
Thermal correction to Enthalpy= 0.737604  
Thermal correction to Gibbs Free Energy= 0.624113

Sum of electronic and zero-point Energies= -1910.984919  
Sum of electronic and thermal Energies= -1910.945659  
Sum of electronic and thermal Enthalpies= -1910.944715  
Sum of electronic and thermal Free Energies= -1911.058206

E(M06/6-311+G(2d,p))= -1912.11420726

**Intermediate t-VIIa**

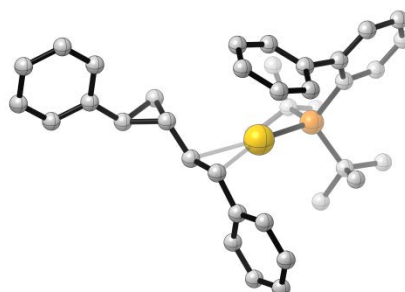

79 0.196112000 0.412894000 0.130812000  
15 2.329885000 -0.320564000 0.826650000  
6 3.460089000 1.188791000 0.669701000  
6 2.155127000 -1.002005000 2.588399000  
6 -2.922834000 -0.107373000 0.435331000  
1 -3.052920000 -0.595926000 -0.533012000  
6 -2.948420000 -0.992257000 1.646228000



|   |              |              |              |
|---|--------------|--------------|--------------|
| 1 | -2.310834000 | -0.714880000 | 2.486577000  |
| 1 | -3.047362000 | -2.065308000 | 1.478087000  |
| 6 | -4.134904000 | -0.125911000 | 1.363423000  |
| 6 | -2.085083000 | 1.095898000  | 0.418846000  |
| 1 | -2.001715000 | 1.635619000  | 1.368995000  |
| 6 | -1.577941000 | 1.649102000  | -0.736066000 |
| 1 | -1.805729000 | 1.132321000  | -1.675003000 |
| 6 | -0.914895000 | 2.956194000  | -0.882691000 |
| 6 | -0.455553000 | 3.324126000  | -2.154257000 |
| 6 | -0.684705000 | 3.824432000  | 0.195004000  |
| 6 | 0.226580000  | 4.520785000  | -2.345787000 |
| 1 | -0.636072000 | 2.655304000  | -2.997066000 |
| 6 | -0.001333000 | 5.017306000  | 0.002146000  |
| 1 | -1.039149000 | 3.561675000  | 1.191793000  |
| 6 | 0.461054000  | 5.368389000  | -1.266717000 |
| 1 | 0.576938000  | 4.791122000  | -3.340434000 |
| 1 | 0.169782000  | 5.682430000  | 0.847071000  |
| 1 | 0.996042000  | 6.305192000  | -1.411939000 |
| 6 | 3.080053000  | -1.633618000 | -0.216547000 |
| 6 | 4.359244000  | -2.109319000 | 0.118144000  |
| 6 | 2.444924000  | -2.158281000 | -1.361836000 |
| 6 | 5.012271000  | -3.058907000 | -0.655406000 |
| 1 | 4.869925000  | -1.725360000 | 0.997670000  |
| 6 | 3.127518000  | -3.104054000 | -2.138838000 |
| 6 | 4.395997000  | -3.552636000 | -1.799294000 |
| 1 | 6.002334000  | -3.405253000 | -0.365157000 |
| 1 | 2.632440000  | -3.499432000 | -3.025590000 |
| 1 | 4.897837000  | -4.290305000 | -2.422812000 |
| 6 | 1.064420000  | -1.840291000 | -1.826879000 |
| 6 | 0.846658000  | -0.943809000 | -2.878796000 |
| 6 | -0.017070000 | -2.574615000 | -1.325317000 |
| 6 | -0.429545000 | -0.785000000 | -3.416793000 |
| 1 | 1.689155000  | -0.383013000 | -3.286463000 |
| 6 | -1.289831000 | -2.418289000 | -1.867402000 |
| 1 | 0.153381000  | -3.293826000 | -0.523405000 |
| 6 | -1.498478000 | -1.526116000 | -2.917531000 |
| 1 | -0.583438000 | -0.094272000 | -4.245057000 |
| 1 | -2.117697000 | -3.011369000 | -1.479881000 |
| 1 | -2.491936000 | -1.413315000 | -3.349881000 |
| 6 | 3.457489000  | -1.084731000 | 3.378306000  |
| 1 | 3.229903000  | -1.497110000 | 4.372974000  |
| 1 | 4.197189000  | -1.752030000 | 2.921101000  |
| 1 | 3.914219000  | -0.098376000 | 3.534193000  |
| 6 | 1.540056000  | -2.395066000 | 2.449494000  |
| 1 | 2.216417000  | -3.105860000 | 1.956511000  |
| 1 | 1.319575000  | -2.784365000 | 3.454530000  |
| 1 | 0.591886000  | -2.372217000 | 1.890264000  |
| 6 | 1.176053000  | -0.117794000 | 3.366149000  |
| 1 | 1.034695000  | -0.553770000 | 4.366453000  |
| 1 | 1.542633000  | 0.907446000  | 3.501099000  |
| 1 | 0.190721000  | -0.068820000 | 2.880051000  |
| 6 | 2.980327000  | 2.260874000  | 1.646311000  |
| 1 | 3.201826000  | 1.993354000  | 2.688161000  |
| 1 | 3.511717000  | 3.199056000  | 1.426148000  |
| 1 | 1.902416000  | 2.461553000  | 1.553765000  |
| 6 | 3.287626000  | 1.694804000  | -0.765654000 |
| 1 | 2.255871000  | 2.012922000  | -0.979662000 |
| 1 | 3.943774000  | 2.565945000  | -0.911118000 |
| 1 | 3.574827000  | 0.936976000  | -1.508755000 |
| 6 | 4.944994000  | 0.924110000  | 0.906993000  |
| 1 | 5.474219000  | 1.887381000  | 0.858421000  |
| 1 | 5.152446000  | 0.487236000  | 1.890848000  |
| 1 | 5.379314000  | 0.277264000  | 0.135577000  |
| 6 | -5.429719000 | -0.671518000 | 0.888873000  |
| 6 | -5.514668000 | -1.801342000 | 0.067322000  |
| 6 | -6.614938000 | -0.032901000 | 1.266850000  |
| 6 | -6.748882000 | -2.273552000 | -0.365368000 |
| 1 | -4.607810000 | -2.323239000 | -0.241888000 |
| 6 | -7.850685000 | -0.506068000 | 0.836944000  |
| 1 | -6.561668000 | 0.847116000  | 1.909052000  |
| 6 | -7.923047000 | -1.628244000 | 0.016849000  |
| 1 | -6.794163000 | -3.153481000 | -1.005693000 |
| 1 | -8.761051000 | 0.006767000  | 1.144228000  |
| 1 | -8.888596000 | -1.999223000 | -0.323001000 |
| 1 | -4.230202000 | 0.757237000  | 1.997502000  |

Zero-point correction= 0.698576  
(Hartree/Particle)  
Thermal correction to Energy= 0.737422  
Thermal correction to Enthalpy= 0.738367  
Thermal correction to Gibbs Free Energy= 0.627312  
Sum of electronic and zero-point Energies= -1910.986467  
Sum of electronic and thermal Energies= -1910.947620  
Sum of electronic and thermal Enthalpies= -1910.946676  
Sum of electronic and thermal Free Energies= -1911.057730

E(M06/6-311+G(2d,p))= -1912.11734643

#### Product *cis*-3b

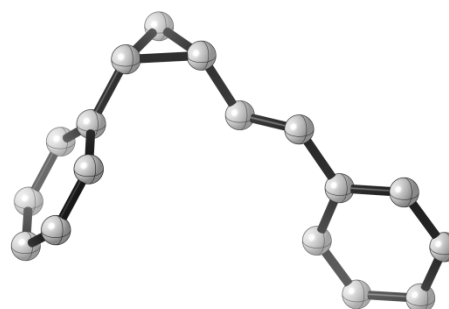

|   |              |              |               |
|---|--------------|--------------|---------------|
| 6 | 3.791657000  | -0.705256000 | -0.600196000  |
| 6 | 4.869836000  | 0.149438000  | -0.396606000  |
| 6 | 4.697481000  | 1.336104000  | 0.309935000   |
| 6 | 3.434637000  | 1.658919000  | 0.807018000   |
| 6 | 2.358948000  | 0.805913000  | 0.602722000   |
| 6 | 2.517207000  | -0.398666000 | -0.101083000  |
| 1 | 3.930331000  | -1.635188000 | -1.153613000  |
| 1 | 5.849653000  | -0.114295000 | -0.793013000  |
| 1 | 5.539194000  | 2.008142000  | 0.469600000   |
| 1 | 3.286783000  | 2.588635000  | 1.355225000   |
| 1 | 1.378284000  | 1.085167000  | 0.987010000   |
| 6 | 1.416309000  | -1.333599000 | -0.336947000  |
| 1 | 1.656732000  | -2.181619000 | -0.986330000  |
| 6 | 0.175552000  | -1.252579000 | 0.167555000   |
| 1 | -0.092444000 | -0.425674000 | 0.832533000   |
| 6 | -0.890940000 | -2.221189000 | -0.105336000  |
| 6 | -2.332844000 | -1.743673000 | -0.253175000  |
| 6 | -1.924781000 | -2.505758000 | 0.958557000   |
| 1 | -0.608031000 | -3.055761000 | -0.748648000  |
| 1 | -2.892245000 | -2.309422000 | -1.001014000  |
| 1 | -2.270953000 | -3.530866000 | 1.075208000   |
| 1 | -1.817733000 | -1.955051000 | 1.893637000   |
| 6 | -2.666384000 | -0.291405000 | -0.207626000  |
| 6 | -3.235655000 | 0.304552000  | 0.919315000   |
| 6 | -2.411537000 | 0.507112000  | -1.329174000  |
| 6 | -3.545088000 | 1.663347000  | 0.927369000   |
| 1 | -3.445626000 | -0.304128000 | 1.799053000   |
| 6 | -2.720096000 | 1.862355000  | -1.325197000  |
| 1 | -1.957963000 | 0.051915000  | -2.2111057000 |
| 6 | -3.288527000 | 2.446282000  | -0.193929000  |
| 1 | -3.989691000 | 2.110204000  | 1.815891000   |
| 1 | -2.512083000 | 2.468069000  | -2.206358000  |
| 1 | -3.528854000 | 3.508487000  | -0.187324000  |

Zero-point correction= 0.276661  
(Hartree/Particle)  
Thermal correction to Energy= 0.290854  
Thermal correction to Enthalpy= 0.291798  
Thermal correction to Gibbs Free Energy= 0.233887  
Sum of electronic and zero-point Energies= -656.609280  
Sum of electronic and thermal Energies= -656.595087  
Sum of electronic and thermal Enthalpies= -656.594143  
Sum of electronic and thermal Free Energies= -656.652054

E(M06/6-311+G(2d,p))= -657.072960834

Product *trans*-3b

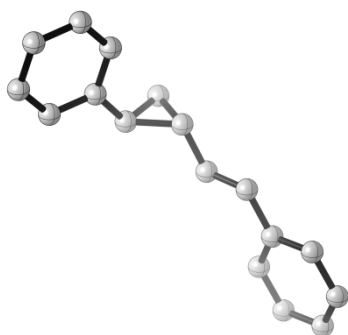

|   |              |              |              |
|---|--------------|--------------|--------------|
| 6 | 3.926107000  | -1.327892000 | -0.562125000 |
| 6 | 5.251931000  | -1.381301000 | -0.145128000 |
| 6 | 5.786561000  | -0.348653000 | 0.619586000  |
| 6 | 4.981265000  | 0.738591000  | 0.959134000  |
| 6 | 3.658516000  | 0.791622000  | 0.541717000  |
| 6 | 3.100943000  | -0.245598000 | -0.222915000 |
| 1 | 3.509788000  | -2.140061000 | -1.159819000 |
| 1 | 5.869700000  | -2.235580000 | -0.419537000 |
| 1 | 6.824196000  | -0.387564000 | 0.947369000  |
| 1 | 5.391119000  | 1.555366000  | 1.552141000  |
| 1 | 3.051923000  | 1.656870000  | 0.808111000  |
| 6 | 1.709925000  | -0.241885000 | -0.678123000 |
| 1 | 1.431790000  | -1.073385000 | -1.333404000 |
| 6 | 0.767331000  | 0.660738000  | -0.366155000 |
| 1 | 1.004859000  | 1.499586000  | 0.296761000  |
| 6 | -0.618038000 | 0.617701000  | -0.843419000 |
| 6 | -1.728742000 | 1.061061000  | 0.106808000  |
| 6 | -1.366171000 | 1.897992000  | -1.078943000 |
| 1 | -0.873243000 | -0.222011000 | -1.493825000 |
| 1 | -2.066329000 | 1.929702000  | -1.913196000 |
| 1 | -0.835830000 | 2.831968000  | -0.895047000 |
| 6 | -3.001350000 | 0.306123000  | 0.185114000  |
| 6 | -3.596400000 | 0.097595000  | 1.433785000  |
| 6 | -3.636620000 | -0.216249000 | -0.947895000 |
| 6 | -4.788816000 | -0.609822000 | 1.551427000  |
| 1 | -3.112124000 | 0.501240000  | 2.323902000  |
| 6 | -4.827141000 | -0.925909000 | -0.831653000 |
| 1 | -3.198032000 | -0.069872000 | -1.935976000 |
| 6 | -5.410017000 | -1.126326000 | 0.417990000  |
| 1 | -5.233066000 | -0.756782000 | 2.535252000  |
| 1 | -5.304426000 | -1.325506000 | -1.725669000 |
| 1 | -6.343164000 | -1.680549000 | 0.507096000  |
| 1 | -1.372865000 | 1.429853000  | 1.070614000  |

Zero-point correction= 0.277221  
(Hartree/Particle)  
Thermal correction to Energy= 0.291318  
Thermal correction to Enthalpy= 0.292262  
Thermal correction to Gibbs Free Energy= 0.234655  
Sum of electronic and zero-point Energies= -656.611124  
Sum of electronic and thermal Energies= -656.597027  
Sum of electronic and thermal Enthalpies= -656.596083  
Sum of electronic and thermal Free Energies= -656.653691

E(M06/6-311+G(2d,p))= -657.075488356

## Calculated free energy profile for the formation and isomerization of 6a

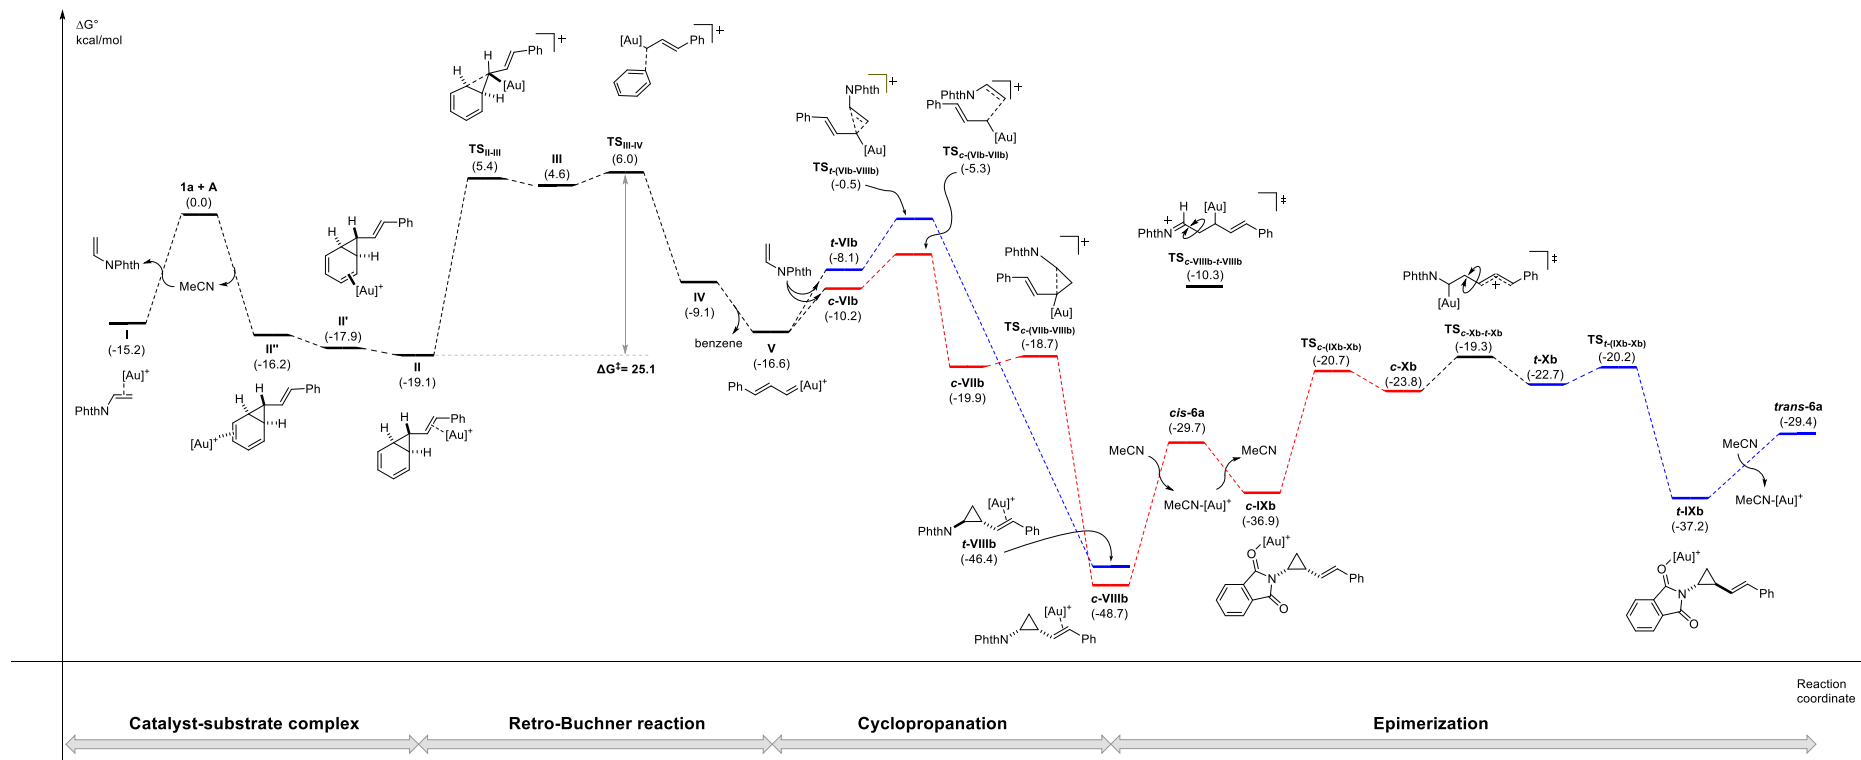

Computational details:  
 SMD(CH<sub>2</sub>Cl<sub>2</sub>)-M06/6-311+G(2d,p), SDD(Au, ≈1.05)/SMD(CH<sub>2</sub>Cl<sub>2</sub>)-M06/6-31G(d), SDD(Au)  
 Gibbs free energies given in kcal/mol at the standard state (298.15 K, 1 atm)  
 [Au] = Au-JohnPhos



**Cartesian coordinates (in Å) and energies (in h) for reactants, intermediates and transition states involved in the formation and isomerization of 6a**

**Intermediate *c*-VIb**

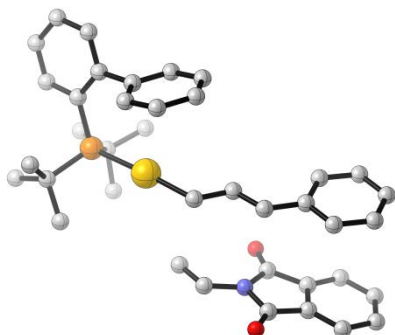

|    |              |              |              |
|----|--------------|--------------|--------------|
| 79 | -1.338241000 | 0.381218000  | 0.620439000  |
| 15 | -3.256436000 | 1.748772000  | 0.109277000  |
| 6  | -2.824856000 | 2.669403000  | -1.490466000 |
| 6  | -4.778815000 | 0.621125000  | -0.035682000 |
| 6  | 0.307100000  | -0.810816000 | 0.863622000  |
| 1  | 0.211358000  | -1.845957000 | 1.220454000  |
| 6  | -0.287554000 | -1.858645000 | -1.798270000 |
| 1  | 0.023624000  | -0.915482000 | -2.237049000 |
| 1  | -1.348752000 | -2.023529000 | -1.624212000 |
| 6  | 0.565864000  | -2.849335000 | -1.513819000 |
| 1  | 0.230935000  | -3.794099000 | -1.086873000 |
| 6  | 1.626594000  | -0.405807000 | 0.665479000  |
| 1  | 1.830992000  | 0.607152000  | 0.312101000  |
| 6  | 2.676428000  | -1.272739000 | 0.909446000  |
| 1  | 2.412933000  | -2.281691000 | 1.246870000  |
| 6  | 4.075045000  | -1.001003000 | 0.771638000  |
| 6  | 4.990451000  | -2.032010000 | 1.066423000  |
| 6  | 4.564190000  | 0.245482000  | 0.324616000  |
| 6  | 6.353391000  | -1.821272000 | 0.935260000  |
| 1  | 4.608822000  | -2.996709000 | 1.402805000  |
| 6  | 5.925551000  | 0.447962000  | 0.191885000  |
| 1  | 3.872629000  | 1.049926000  | 0.081504000  |
| 6  | 6.819589000  | -0.582244000 | 0.497310000  |
| 1  | 7.054739000  | -2.620563000 | 1.164682000  |
| 1  | 6.301104000  | 1.408923000  | -0.153068000 |
| 1  | 7.890168000  | -0.414755000 | 0.392318000  |
| 6  | -3.669939000 | 3.075332000  | 1.320956000  |
| 6  | -4.787535000 | 3.890058000  | 1.072657000  |
| 6  | -2.874017000 | 3.360122000  | 2.451251000  |
| 6  | -5.112146000 | 4.963967000  | 1.889790000  |
| 1  | -5.420995000 | 3.691955000  | 0.212115000  |
| 6  | -3.202716000 | 4.463455000  | 3.251415000  |
| 6  | -4.305145000 | 5.261631000  | 2.981720000  |
| 1  | -5.988639000 | 5.568431000  | 1.663835000  |
| 1  | -2.576162000 | 4.680455000  | 4.116411000  |
| 1  | -4.536980000 | 6.107840000  | 3.626079000  |
| 6  | -1.701188000 | 2.569972000  | 2.919313000  |
| 6  | -0.406524000 | 3.082382000  | 2.784567000  |
| 6  | -1.888199000 | 1.385978000  | 3.641776000  |
| 6  | 0.679247000  | 2.421601000  | 3.354416000  |
| 1  | -0.256553000 | 4.019191000  | 2.246392000  |
| 6  | -0.802938000 | 0.729545000  | 4.218315000  |
| 1  | -2.898003000 | 0.995530000  | 3.774871000  |
| 6  | 0.482689000  | 1.247674000  | 4.078195000  |
| 1  | 1.680297000  | 2.837844000  | 3.248649000  |
| 1  | -0.967324000 | -0.182020000 | 4.791419000  |
| 1  | 1.328937000  | 0.742281000  | 4.541486000  |
| 6  | -5.948006000 | 1.172609000  | -0.846878000 |
| 1  | -6.742135000 | 0.410756000  | -0.868836000 |
| 1  | -6.390623000 | 2.077230000  | -0.412762000 |
| 1  | -5.669610000 | 1.380145000  | -1.888205000 |
| 6  | -5.233194000 | 0.330251000  | 1.396013000  |

|   |              |              |              |
|---|--------------|--------------|--------------|
| 1 | -5.617045000 | 1.223488000  | 1.905890000  |
| 1 | -6.043255000 | -0.413621000 | 1.365406000  |
| 1 | -4.420979000 | -0.094376000 | 2.005001000  |
| 6 | -4.338890000 | -0.701311000 | -0.672522000 |
| 1 | -5.200024000 | -1.386614000 | -0.683514000 |
| 1 | -4.002706000 | -0.580791000 | -1.709920000 |
| 1 | -3.532589000 | -1.185124000 | -0.102062000 |
| 6 | -2.655354000 | 1.643200000  | -2.608726000 |
| 1 | -3.614397000 | 1.205427000  | -2.917284000 |
| 1 | -2.225423000 | 2.145227000  | -3.488641000 |
| 1 | -1.973292000 | 0.828099000  | -2.326170000 |
| 6 | -1.479360000 | 3.348058000  | -1.218837000 |
| 1 | -0.688209000 | 2.621243000  | -0.978983000 |
| 1 | -1.170141000 | 3.900432000  | -2.119235000 |
| 1 | -1.545045000 | 4.072511000  | -0.394007000 |
| 6 | -3.816066000 | 3.739809000  | -1.939542000 |
| 1 | -3.464965000 | 4.151711000  | -2.897817000 |
| 1 | -4.826291000 | 3.346375000  | -2.103307000 |
| 1 | -3.876738000 | 4.574428000  | -1.230411000 |
| 7 | 1.947670000  | -2.834960000 | -1.704872000 |
| 6 | 2.737856000  | -3.971477000 | -1.380753000 |
| 6 | 2.729327000  | -1.837048000 | -2.334122000 |
| 6 | 4.096486000  | -3.675576000 | -1.869690000 |
| 6 | 4.095884000  | -2.398086000 | -2.423355000 |
| 8 | 2.318914000  | -4.949640000 | -0.807078000 |
| 8 | 2.327345000  | -0.758981000 | -2.708673000 |
| 6 | 5.242095000  | -4.449716000 | -1.825893000 |
| 1 | 5.231214000  | -5.448277000 | -1.393270000 |
| 6 | 5.244606000  | -1.835700000 | -2.948261000 |
| 1 | 5.237443000  | -0.832645000 | -3.370939000 |
| 6 | 6.405380000  | -3.895450000 | -2.364670000 |
| 1 | 7.327881000  | -4.472495000 | -2.357514000 |
| 6 | 6.407191000  | -2.610085000 | -2.912590000 |
| 1 | 7.332514000  | -2.207249000 | -3.319839000 |

Zero-point correction= 0.709580  
 (Hartree/Particle)  
 Thermal correction to Energy= 0.753568  
 Thermal correction to Enthalpy= 0.754512  
 Thermal correction to Gibbs Free Energy= 0.631286  
 Sum of electronic and zero-point Energies= -2191.617480  
 Sum of electronic and thermal Energies= -2191.573492  
 Sum of electronic and thermal Enthalpies= -2191.572547  
 Sum of electronic and thermal Free Energies= -2191.695774

E(M06/6-311+G(2d,p))= -2192.84239272

**Intermediate *t*-VIb**

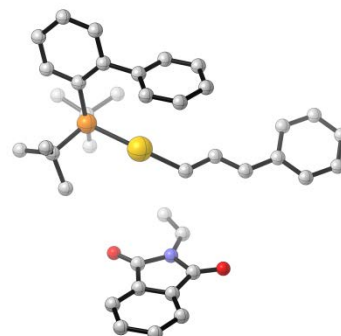

|    |              |              |              |
|----|--------------|--------------|--------------|
| 79 | 0.518130000  | 0.028345000  | 0.119289000  |
| 15 | 2.765316000  | -0.805382000 | 0.415590000  |
| 6  | 3.227112000  | -0.448706000 | 2.220380000  |
| 6  | 2.795636000  | -2.657522000 | -0.020105000 |
| 6  | -1.387825000 | 0.760622000  | 0.006225000  |

|   |              |              |              |
|---|--------------|--------------|--------------|
| 1 | -2.207944000 | 0.176197000  | -0.435995000 |
| 6 | -1.950847000 | -0.937702000 | 2.619141000  |
| 1 | -1.794083000 | -0.101584000 | 3.297173000  |
| 1 | -1.197450000 | -1.717751000 | 2.579904000  |
| 6 | -3.070516000 | -0.973626000 | 1.893172000  |
| 6 | -1.758436000 | 2.052704000  | 0.370128000  |
| 1 | -1.020195000 | 2.720459000  | 0.817490000  |
| 6 | -3.033676000 | 2.516287000  | 0.094925000  |
| 1 | -3.742701000 | 1.785714000  | -0.307915000 |
| 6 | -3.533993000 | 3.842943000  | 0.268018000  |
| 6 | -4.896126000 | 4.083741000  | -0.008482000 |
| 6 | -2.722328000 | 4.910844000  | 0.710298000  |
| 6 | -5.435722000 | 5.346747000  | 0.165198000  |
| 1 | -5.518196000 | 3.258484000  | -0.353637000 |
| 6 | -3.266555000 | 6.170207000  | 0.877190000  |
| 1 | -1.665587000 | 4.746763000  | 0.914005000  |
| 6 | -4.621188000 | 6.387990000  | 0.608965000  |
| 1 | -6.488297000 | 5.525660000  | -0.042476000 |
| 1 | -2.641042000 | 6.992634000  | 1.217148000  |
| 1 | -5.043223000 | 7.382322000  | 0.743941000  |
| 6 | 4.093578000  | 0.027933000  | -0.556675000 |
| 6 | 5.385527000  | -0.522271000 | -0.516441000 |
| 6 | 3.905241000  | 1.235288000  | -1.264478000 |
| 6 | 6.468368000  | 0.086822000  | -1.134650000 |
| 1 | 5.558707000  | -1.448675000 | 0.024450000  |
| 6 | 5.016265000  | 1.850750000  | -1.859662000 |
| 6 | 6.284280000  | 1.291168000  | -1.803588000 |
| 1 | 7.451805000  | -0.376558000 | -1.081801000 |
| 1 | 4.861343000  | 2.787174000  | -2.395288000 |
| 1 | 7.122912000  | 1.792075000  | -2.283855000 |
| 6 | 2.613152000  | 1.947300000  | -1.470196000 |
| 6 | 2.381592000  | 3.170532000  | -0.832631000 |
| 6 | 1.685637000  | 1.495806000  | -2.417088000 |
| 6 | 1.245116000  | 3.921165000  | -1.124329000 |
| 1 | 3.113742000  | 3.544324000  | -0.115753000 |
| 6 | 0.554574000  | 2.252410000  | -2.717717000 |
| 1 | 1.871201000  | 0.558326000  | -2.943240000 |
| 6 | 0.329777000  | 3.464958000  | -2.070260000 |
| 1 | 1.084439000  | 4.874606000  | -0.622328000 |
| 1 | -0.149084000 | 1.894112000  | -3.468217000 |
| 1 | -0.554087000 | 4.056862000  | -2.307017000 |
| 6 | 3.857427000  | -3.504181000 | 0.678367000  |
| 1 | 3.745410000  | -4.543707000 | 0.334280000  |
| 1 | 4.886236000  | -3.204850000 | 0.446503000  |
| 1 | 3.733709000  | -3.510650000 | 1.768670000  |
| 6 | 2.963913000  | -2.757524000 | -1.536329000 |
| 1 | 3.966239000  | -2.464259000 | -1.872583000 |
| 1 | 2.802356000  | -3.802508000 | -1.840920000 |
| 1 | 2.226156000  | -2.141246000 | -2.072029000 |
| 6 | 1.422205000  | -3.230324000 | 0.342003000  |
| 1 | 1.407268000  | -4.302630000 | 0.094201000  |
| 1 | 1.187721000  | -3.135669000 | 1.409618000  |
| 1 | 0.615476000  | -2.743696000 | -0.223396000 |
| 6 | 2.271739000  | -1.212771000 | 3.135163000  |
| 1 | 2.414677000  | -2.300249000 | 3.080362000  |
| 1 | 2.459452000  | -0.909751000 | 4.176508000  |
| 1 | 1.219160000  | -0.986759000 | 2.909741000  |
| 6 | 3.004191000  | 1.053243000  | 2.414245000  |
| 1 | 1.959560000  | 1.342350000  | 2.222586000  |
| 1 | 3.243320000  | 1.317791000  | 3.455483000  |
| 1 | 3.654908000  | 1.653039000  | 1.762335000  |
| 6 | 4.669376000  | -0.773530000 | 2.596779000  |
| 1 | 4.807942000  | -0.547558000 | 3.664884000  |
| 1 | 4.925498000  | -1.828692000 | 2.449193000  |
| 1 | 5.390132000  | -0.160829000 | 2.040831000  |
| 1 | -3.823828000 | -0.188458000 | 1.950642000  |
| 7 | -3.431018000 | -1.964764000 | 0.972558000  |
| 6 | -2.764431000 | -3.179706000 | 0.709842000  |
| 6 | -4.561036000 | -1.809733000 | 0.134718000  |
| 6 | -3.549793000 | -3.846024000 | -0.353158000 |
| 6 | -4.628811000 | -3.033102000 | -0.688215000 |
| 8 | -1.758864000 | -3.567355000 | 1.261606000  |
| 8 | -5.279638000 | -0.835434000 | 0.127626000  |
| 6 | -5.545426000 | -3.403913000 | -1.654858000 |
| 1 | -6.388509000 | -2.764219000 | -1.908891000 |
| 6 | -3.336216000 | -5.061292000 | -0.976213000 |

|   |              |              |              |
|---|--------------|--------------|--------------|
| 1 | -2.488247000 | -5.689472000 | -0.709900000 |
| 6 | -4.255533000 | -5.445503000 | -1.956252000 |
| 1 | -4.123503000 | -6.394295000 | -2.472384000 |
| 6 | -5.341407000 | -4.632715000 | -2.287970000 |
| 1 | -6.039274000 | -4.963544000 | -3.054506000 |

Zero-point correction= 0.709078  
(Hartree/Particle)  
Thermal correction to Energy= 0.753602  
Thermal correction to Enthalpy= 0.754546  
Thermal correction to Gibbs Free Energy= 0.628362  
Sum of electronic and zero-point Energies= -2191.612043  
Sum of electronic and thermal Energies= -2191.567519  
Sum of electronic and thermal Enthalpies= -2191.566575  
Sum of electronic and thermal Free Energies= -2191.692759

E(M06/6-311+G(2d,p))= -2192.83609959

#### Transition state TS<sub>c-(vib-vib)</sub>

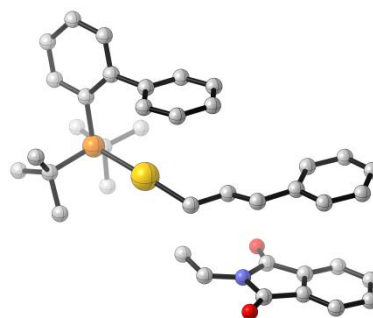

|    |              |              |              |
|----|--------------|--------------|--------------|
| 79 | -1.468853000 | 0.241093000  | 0.193020000  |
| 15 | -3.339689000 | 1.725265000  | 0.038982000  |
| 6  | -3.039787000 | 2.786735000  | -1.501846000 |
| 6  | -4.921252000 | 0.667878000  | -0.057416000 |
| 6  | 0.154489000  | -1.050464000 | 0.209116000  |
| 1  | 0.052760000  | -2.047957000 | 0.656403000  |
| 6  | -0.181871000 | -1.698090000 | -1.964967000 |
| 1  | 0.212416000  | -0.795444000 | -2.422359000 |
| 1  | -1.260390000 | -1.833092000 | -1.950813000 |
| 6  | 0.593926000  | -2.788633000 | -1.723434000 |
| 1  | 0.161388000  | -3.720308000 | -1.358785000 |
| 6  | 1.486886000  | -0.562948000 | 0.190283000  |
| 1  | 1.668148000  | 0.429082000  | -0.230607000 |
| 6  | 2.522619000  | -1.285453000 | 0.710445000  |
| 1  | 2.291482000  | -2.282974000 | 1.101445000  |
| 6  | 3.904470000  | -0.872876000 | 0.816884000  |
| 6  | 4.845980000  | -1.799384000 | 1.296379000  |
| 6  | 4.350116000  | 0.395497000  | 0.400038000  |
| 6  | 6.193347000  | -1.472220000 | 1.359128000  |
| 1  | 4.502683000  | -2.783876000 | 1.616683000  |
| 6  | 5.695562000  | 0.719692000  | 0.467350000  |
| 1  | 3.635636000  | 1.128514000  | 0.027498000  |
| 6  | 6.619740000  | -0.212335000 | 0.944144000  |
| 1  | 6.912874000  | -2.199059000 | 1.731787000  |
| 1  | 6.031990000  | 1.703538000  | 0.145394000  |
| 1  | 7.675774000  | 0.047702000  | 0.993129000  |
| 6  | -3.563108000 | 2.939654000  | 1.409612000  |
| 6  | -4.712305000 | 3.747035000  | 1.395563000  |
| 6  | -2.606774000 | 3.154740000  | 2.426374000  |
| 6  | -4.924408000 | 4.747366000  | 2.334021000  |
| 1  | -5.467073000 | 3.594866000  | 0.628525000  |
| 6  | -2.826617000 | 4.186644000  | 3.350905000  |
| 6  | -3.966099000 | 4.976761000  | 3.314400000  |
| 1  | -5.831967000 | 5.346543000  | 2.292630000  |
| 1  | -2.079604000 | 4.348950000  | 4.127588000  |
| 1  | -4.106959000 | 5.761899000  | 4.055161000  |
| 6  | -1.362166000 | 2.366375000  | 2.648915000  |
| 6  | -0.112926000 | 2.956236000  | 2.429152000  |
| 6  | -1.413644000 | 1.088275000  | 3.218720000  |
| 6  | 1.059444000  | 2.280973000  | 2.761058000  |
| 1  | -0.063885000 | 3.961051000  | 2.007938000  |

|   |              |              |              |
|---|--------------|--------------|--------------|
| 6 | -0.241642000 | 0.420950000  | 3.568391000  |
| 1 | -2.384055000 | 0.627133000  | 3.409265000  |
| 6 | 0.997448000  | 1.016785000  | 3.342277000  |
| 1 | 2.024278000  | 2.756560000  | 2.588011000  |
| 1 | -0.300189000 | -0.565542000 | 4.027127000  |
| 1 | 1.913596000  | 0.496910000  | 3.619938000  |
| 6 | -6.107922000 | 1.289895000  | -0.790094000 |
| 1 | -6.949358000 | 0.581836000  | -0.743902000 |
| 1 | -6.457916000 | 2.228712000  | -0.345706000 |
| 1 | -5.892048000 | 1.466296000  | -1.851681000 |
| 6 | -5.312017000 | 0.334945000  | 1.383620000  |
| 1 | -5.682909000 | 1.209885000  | 1.932196000  |
| 1 | -6.114448000 | -0.417600000 | 1.367764000  |
| 1 | -4.469936000 | -0.092660000 | 1.949116000  |
| 6 | -4.567896000 | -0.643693000 | -0.769280000 |
| 1 | -5.473073000 | -1.267237000 | -0.823302000 |
| 1 | -4.211837000 | -0.488554000 | -1.796527000 |
| 1 | -3.800781000 | -1.212020000 | -0.224477000 |
| 6 | -2.959865000 | 1.861637000  | -2.715841000 |
| 1 | -3.930250000 | 1.410429000  | -2.962044000 |
| 1 | -2.640613000 | 2.449542000  | -3.589708000 |
| 1 | -2.224944000 | 1.054626000  | -2.572173000 |
| 6 | -1.675742000 | 3.447199000  | -1.287531000 |
| 1 | -0.873443000 | 2.705502000  | -1.155356000 |
| 1 | -1.431248000 | 4.055460000  | -2.171501000 |
| 1 | -1.674820000 | 4.116835000  | -0.415566000 |
| 6 | -4.069339000 | 3.882743000  | -1.758850000 |
| 1 | -3.789129000 | 4.411351000  | -2.682605000 |
| 1 | -5.084148000 | 3.492363000  | -1.898189000 |
| 1 | -4.087898000 | 4.626647000  | -0.952529000 |
| 7 | 1.962135000  | -2.841406000 | -1.799626000 |
| 6 | 2.686042000  | -3.981538000 | -1.324278000 |
| 6 | 2.847525000  | -1.881899000 | -2.373767000 |
| 6 | 4.100273000  | -3.709158000 | -1.622262000 |
| 6 | 4.196959000  | -2.464071000 | -2.240133000 |
| 8 | 2.167481000  | -4.929301000 | -0.787202000 |
| 8 | 2.512008000  | -0.829944000 | -2.863002000 |
| 6 | 5.220140000  | -4.477086000 | -1.354737000 |
| 1 | 5.133691000  | -5.448103000 | -0.871089000 |
| 6 | 5.418624000  | -1.933732000 | -2.613264000 |
| 1 | 5.487485000  | -0.955384000 | -3.085179000 |
| 6 | 6.457362000  | -3.952838000 | -1.734193000 |
| 1 | 7.363496000  | -4.523944000 | -1.542866000 |
| 6 | 6.554763000  | -2.702706000 | -2.350710000 |
| 1 | 7.535096000  | -2.322370000 | -2.630323000 |

Zero-point correction= 0.710651  
(Hartree/Particle)  
Thermal correction to Energy= 0.753167  
Thermal correction to Enthalpy= 0.754111  
Thermal correction to Gibbs Free Energy= 0.636258  
Sum of electronic and zero-point Energies= -2191.614076  
Sum of electronic and thermal Energies= -2191.571560  
Sum of electronic and thermal Enthalpies= -2191.570615  
Sum of electronic and thermal Free Energies= -2191.688469

E(M06/6-311+G(2d,p))= -2192.83951082  
E(PBE/6-311+G(2d,p))= -2191.797188  
E(PBE-D3(BJ)/6-311+G(2d,p))= -2191.9486528

### Transition state TS<sub>r</sub>-(vIb-vIIIb)

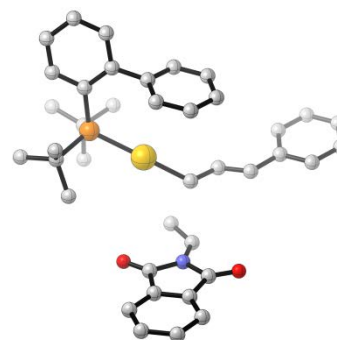

|    |              |              |              |
|----|--------------|--------------|--------------|
| 79 | -0.519411000 | -0.058943000 | -0.333565000 |
| 15 | -2.744913000 | -0.950192000 | -0.419930000 |
| 6  | -3.407043000 | -0.492479000 | -2.134552000 |
| 6  | -2.650490000 | -2.826695000 | -0.115928000 |
| 6  | 1.398119000  | 0.731883000  | -0.397541000 |
| 1  | 2.142048000  | 0.345951000  | 0.311518000  |
| 6  | 1.934820000  | -0.516286000 | -2.229390000 |
| 1  | 1.744850000  | 0.298834000  | -2.923272000 |
| 1  | 1.255313000  | -1.362333000 | -2.240084000 |
| 6  | 3.141522000  | -0.577534000 | -1.611429000 |
| 6  | 1.646374000  | 2.077773000  | -0.804317000 |
| 1  | 0.925991000  | 2.559141000  | -1.470763000 |
| 6  | 2.667994000  | 2.794806000  | -0.258558000 |
| 1  | 3.388243000  | 2.250190000  | 0.361953000  |
| 6  | 2.898501000  | 4.219254000  | -0.368560000 |
| 6  | 4.042803000  | 4.762372000  | 0.239379000  |
| 6  | 2.018304000  | 5.082162000  | -1.046435000 |
| 6  | 4.308798000  | 6.122340000  | 0.163692000  |
| 1  | 4.723967000  | 4.097591000  | 0.770819000  |
| 6  | 2.285100000  | 6.439783000  | -1.118415000 |
| 1  | 1.117885000  | 4.683135000  | -1.511418000 |
| 6  | 3.429939000  | 6.963537000  | -0.514669000 |
| 1  | 5.200579000  | 6.529025000  | 0.636805000  |
| 1  | 1.596934000  | 7.099885000  | -1.643326000 |
| 1  | 3.633140000  | 8.031568000  | -0.571190000 |
| 6  | -3.980851000 | -0.247048000 | 0.753531000  |
| 6  | -5.268016000 | -0.808763000 | 0.775036000  |
| 6  | -3.733572000 | 0.884788000  | 1.562051000  |
| 6  | -6.294842000 | -0.275194000 | 1.541998000  |
| 1  | -5.484726000 | -1.684586000 | 0.169330000  |
| 6  | -4.790896000 | 1.427657000  | 2.306792000  |
| 6  | -6.057845000 | 0.863011000  | 2.303607000  |
| 1  | -7.276644000 | -0.744739000 | 1.534090000  |
| 1  | -4.591410000 | 2.308123000  | 2.917065000  |
| 1  | -6.852355000 | 1.307047000  | 2.900683000  |
| 6  | -2.423119000 | 1.570488000  | 1.735498000  |
| 6  | -2.247209000 | 2.875051000  | 1.262300000  |
| 6  | -1.400083000 | 0.982107000  | 2.488576000  |
| 6  | -1.068754000 | 3.570791000  | 1.521159000  |
| 1  | -3.049874000 | 3.348444000  | 0.695439000  |
| 6  | -0.226499000 | 1.682750000  | 2.758864000  |
| 1  | -1.539822000 | -0.024507000 | 2.885417000  |
| 6  | -0.057454000 | 2.977688000  | 2.273506000  |
| 1  | -0.951404000 | 4.588984000  | 1.152484000  |
| 1  | 0.554443000  | 1.215603000  | 3.358071000  |
| 1  | 0.858708000  | 3.527085000  | 2.487286000  |
| 6  | -3.750581000 | -3.675174000 | -0.748620000 |
| 1  | -3.565375000 | -4.727689000 | -0.484982000 |
| 1  | -4.756734000 | -3.430206000 | -0.388509000 |
| 1  | -3.746889000 | -3.612675000 | -1.844575000 |
| 6  | -2.644226000 | -3.028599000 | 1.399296000  |
| 1  | -3.615860000 | -2.807604000 | 1.858767000  |
| 1  | -2.404463000 | -4.080541000 | 1.615705000  |
| 1  | -1.879730000 | -2.409034000 | 1.891986000  |
| 6  | -1.304208000 | -3.310526000 | -0.664166000 |
| 1  | -1.218778000 | -4.394290000 | -0.492282000 |
| 1  | -1.199224000 | -3.138756000 | -1.743676000 |
| 1  | -0.458024000 | -2.823485000 | -0.160597000 |
| 6  | -2.512479000 | -1.138372000 | -3.192737000 |

|   |              |              |              |
|---|--------------|--------------|--------------|
| 1 | -2.620048000 | -2.231034000 | -3.222482000 |
| 1 | -2.801409000 | -0.753378000 | -4.182522000 |
| 1 | -1.449090000 | -0.897133000 | -3.041468000 |
| 6 | -3.278039000 | 1.030047000  | -2.233053000 |
| 1 | -2.234044000 | 1.364733000  | -2.134144000 |
| 1 | -3.647512000 | 1.356392000  | -3.216906000 |
| 1 | -3.878175000 | 1.542111000  | -1.467299000 |
| 6 | -4.862313000 | -0.867321000 | -2.400695000 |
| 1 | -5.106476000 | -0.591107000 | -3.437628000 |
| 1 | -5.056838000 | -1.940222000 | -2.292651000 |
| 1 | -5.555078000 | -0.319674000 | -1.749609000 |
| 1 | 3.847723000  | 0.251167000  | -1.663616000 |
| 7 | 3.593253000  | -1.607437000 | -0.813292000 |
| 6 | 3.025454000  | -2.899525000 | -0.646663000 |
| 6 | 4.762872000  | -1.454627000 | -0.011396000 |
| 6 | 3.928092000  | -3.607878000 | 0.281863000  |
| 6 | 4.965040000  | -2.753472000 | 0.651236000  |
| 8 | 2.012579000  | -3.291449000 | -1.176907000 |
| 8 | 5.395562000  | -0.429302000 | 0.066476000  |
| 6 | 5.966722000  | -3.156880000 | 1.515836000  |
| 1 | 6.773233000  | -2.482978000 | 1.797787000  |
| 6 | 3.850404000  | -4.902853000 | 0.760789000  |
| 1 | 3.037746000  | -5.564597000 | 0.467776000  |
| 6 | 4.859151000  | -5.321003000 | 1.631916000  |
| 1 | 4.837121000  | -6.333698000 | 2.028966000  |
| 6 | 5.898910000  | -4.464511000 | 2.001477000  |
| 1 | 6.668897000  | -4.824627000 | 2.680485000  |

Zero-point correction= 0.710746  
(Hartree/Particle)  
Thermal correction to Energy= 0.753561  
Thermal correction to Enthalpy= 0.754505  
Thermal correction to Gibbs Free Energy= 0.634523  
Sum of electronic and zero-point Energies= -2191.605785  
Sum of electronic and thermal Energies= -2191.562970  
Sum of electronic and thermal Enthalpies= -2191.562026  
Sum of electronic and thermal Free Energies= -2191.682008

E(M06/6-311+G(2d,p))= -2192.83026447  
E(PBE/6-311+G(2d,p))= -2191.794519  
E(PBE-D3(BJ)/6-311+G(2d,p))= -2191.9391044

### Intermediate c-VIIb

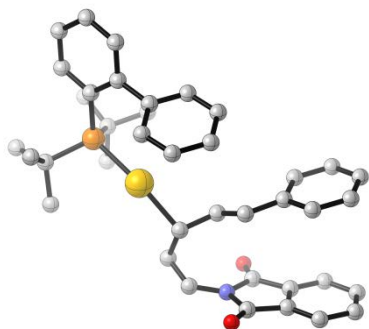

|    |              |              |              |
|----|--------------|--------------|--------------|
| 79 | -1.480385000 | 0.108071000  | -0.004541000 |
| 15 | -3.236173000 | 1.706023000  | 0.017173000  |
| 6  | -2.859409000 | 2.856330000  | -1.439602000 |
| 6  | -4.878571000 | 0.761260000  | -0.151906000 |
| 6  | 0.053313000  | -1.403970000 | -0.435694000 |
| 1  | -0.114925000 | -2.114265000 | 0.388252000  |
| 6  | -0.336787000 | -1.932508000 | -1.865065000 |
| 1  | 0.016323000  | -1.255752000 | -2.644096000 |
| 1  | -1.392563000 | -2.182823000 | -1.971757000 |
| 6  | 0.492883000  | -3.065651000 | -1.547714000 |
| 1  | 0.056841000  | -3.907914000 | -1.010918000 |
| 6  | 1.330090000  | -0.696261000 | -0.376686000 |
| 1  | 1.487331000  | 0.072905000  | -1.139918000 |
| 6  | 2.328836000  | -1.003594000 | 0.478197000  |
| 1  | 2.164316000  | -1.830014000 | 1.179781000  |
| 6  | 3.651539000  | -0.392767000 | 0.526429000  |
| 6  | 4.655138000  | -1.020651000 | 1.279707000  |

|   |              |              |              |
|---|--------------|--------------|--------------|
| 6 | 3.985548000  | 0.764918000  | -0.196429000 |
| 6 | 5.954341000  | -0.526183000 | 1.294711000  |
| 1 | 4.404100000  | -1.916816000 | 1.849901000  |
| 6 | 5.280706000  | 1.263752000  | -0.171853000 |
| 1 | 3.218531000  | 1.285732000  | -0.769881000 |
| 6 | 6.272589000  | 0.617469000  | 0.566934000  |
| 1 | 6.720898000  | -1.034204000 | 1.878241000  |
| 1 | 5.521768000  | 2.164567000  | -0.734611000 |
| 1 | 7.287860000  | 1.010373000  | 0.579626000  |
| 6 | -3.373592000 | 2.823430000  | 1.474748000  |
| 6 | -4.466560000 | 3.704110000  | 1.530339000  |
| 6 | -2.390150000 | 2.909815000  | 2.484663000  |
| 6 | -4.594822000 | 4.657737000  | 2.530356000  |
| 1 | -5.240029000 | 3.651131000  | 0.768422000  |
| 6 | -2.522114000 | 3.900005000  | 3.469270000  |
| 6 | -3.604692000 | 4.766843000  | 3.499877000  |
| 1 | -5.460698000 | 5.317051000  | 2.541357000  |
| 1 | -1.755813000 | 3.965587000  | 4.241329000  |
| 1 | -3.679942000 | 5.517256000  | 4.284918000  |
| 6 | -1.214447000 | 2.013124000  | 2.644278000  |
| 6 | 0.080129000  | 2.536241000  | 2.556713000  |
| 6 | -1.376402000 | 0.679035000  | 3.039193000  |
| 6 | 1.187825000  | 1.748037000  | 2.857238000  |
| 1 | 0.214213000  | 3.580443000  | 2.271392000  |
| 6 | -0.268458000 | -0.107702000 | 3.347606000  |
| 1 | -2.382143000 | 0.269521000  | 3.143903000  |
| 6 | 1.015704000  | 0.425707000  | 3.259788000  |
| 1 | 2.188120000  | 2.174001000  | 2.790057000  |
| 1 | -0.412622000 | -1.137940000 | 3.672181000  |
| 1 | 1.882163000  | -0.183683000 | 3.514381000  |
| 6 | -6.023875000 | 1.530368000  | -0.808394000 |
| 1 | -6.914227000 | 0.883206000  | -0.810219000 |
| 1 | -6.302040000 | 2.447487000  | -0.276306000 |
| 1 | -5.807431000 | 1.784691000  | -1.854163000 |
| 6 | -5.283734000 | 0.329781000  | 1.257911000  |
| 1 | -5.583976000 | 1.178183000  | 1.885489000  |
| 1 | -6.140060000 | -0.357063000 | 1.186791000  |
| 1 | -4.473385000 | -0.208313000 | 1.772192000  |
| 6 | -4.620830000 | -0.500429000 | -0.983293000 |
| 1 | -5.567240000 | -1.053028000 | -1.084775000 |
| 1 | -4.258583000 | -0.277444000 | -1.995529000 |
| 1 | -3.892314000 | -1.166522000 | -0.498301000 |
| 6 | -2.858454000 | 2.034175000  | -2.727311000 |
| 1 | -3.866050000 | 1.701174000  | -3.009726000 |
| 1 | -2.479185000 | 2.662586000  | -3.547178000 |
| 1 | -2.206249000 | 1.150033000  | -2.656151000 |
| 6 | -1.448842000 | 3.393599000  | -1.182233000 |
| 1 | -0.701497000 | 2.586878000  | -1.127640000 |
| 1 | -1.167313000 | 4.062988000  | -2.008881000 |
| 1 | -1.394956000 | 3.975105000  | -0.250660000 |
| 6 | -3.804006000 | 4.045556000  | -1.598372000 |
| 1 | -3.482623000 | 4.624014000  | -2.477745000 |
| 1 | -4.845795000 | 3.748616000  | -1.767614000 |
| 1 | -3.769085000 | 4.722830000  | -0.735800000 |
| 7 | 1.829686000  | -3.152151000 | -1.683086000 |
| 6 | 2.595030000  | -4.065021000 | -0.861792000 |
| 6 | 2.708172000  | -2.300493000 | -2.438986000 |
| 6 | 4.002086000  | -3.775362000 | -1.156756000 |
| 6 | 4.068930000  | -2.725547000 | -2.072542000 |
| 8 | 2.088201000  | -4.848055000 | -0.100948000 |
| 8 | 2.345580000  | -1.449806000 | -3.212659000 |
| 6 | 5.143503000  | -4.345350000 | -0.619947000 |
| 1 | 5.080773000  | -5.160502000 | 0.098164000  |
| 6 | 5.280685000  | -2.203293000 | -2.487597000 |
| 1 | 5.325306000  | -1.377881000 | -3.195139000 |
| 6 | 6.370834000  | -3.825361000 | -1.035460000 |
| 1 | 7.292858000  | -4.242553000 | -0.636110000 |
| 6 | 6.437763000  | -2.771770000 | -1.950369000 |
| 1 | 7.410634000  | -2.386395000 | -2.248094000 |

Zero-point correction= 0.711652  
(Hartree/Particle)  
Thermal correction to Energy= 0.754683  
Thermal correction to Enthalpy= 0.755627  
Thermal correction to Gibbs Free Energy= 0.634997  
Sum of electronic and zero-point Energies= -2191.636077

Sum of electronic and thermal Energies= -2191.593046  
 Sum of electronic and thermal Enthalpies= -2191.592102  
 Sum of electronic and thermal Free Energies= -2191.712732

E(M06/6-311+G(2d,p))= -2192.86157272

**Transition state TS<sub>c-(VIIIb-VIIIb)</sub>**

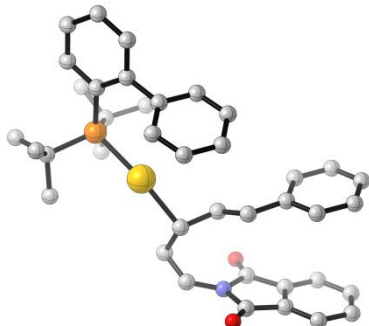

|    |              |              |              |
|----|--------------|--------------|--------------|
| 79 | -1.478987000 | 0.107505000  | -0.002181000 |
| 15 | -3.233137000 | 1.704435000  | 0.015953000  |
| 6  | -2.853038000 | 2.855597000  | -1.439119000 |
| 6  | -4.874567000 | 0.759161000  | -0.157694000 |
| 6  | 0.056844000  | -1.409922000 | -0.436627000 |
| 1  | -0.124026000 | -2.110232000 | 0.392575000  |
| 6  | -0.343549000 | -1.925747000 | -1.865899000 |
| 1  | 0.013066000  | -1.249679000 | -2.643665000 |
| 1  | -1.399750000 | -2.174099000 | -1.971802000 |
| 6  | 0.486824000  | -3.052626000 | -1.533958000 |
| 1  | 0.049825000  | -3.893925000 | -0.997117000 |
| 6  | 1.330733000  | -0.696178000 | -0.374396000 |
| 1  | 1.487076000  | 0.072521000  | -1.138195000 |
| 6  | 2.328781000  | -1.001245000 | 0.481489000  |
| 1  | 2.165201000  | -1.827402000 | 1.183544000  |
| 6  | 3.651669000  | -0.390384000 | 0.527600000  |
| 6  | 4.657337000  | -1.020537000 | 1.276062000  |
| 6  | 3.983888000  | 0.768297000  | -0.194309000 |
| 6  | 5.957030000  | -0.527140000 | 1.287285000  |
| 1  | 4.407702000  | -1.917508000 | 1.845530000  |
| 6  | 5.279687000  | 1.265672000  | -0.174030000 |
| 1  | 3.215218000  | 1.290742000  | -0.764022000 |
| 6  | 6.273675000  | 0.617279000  | 0.560064000  |
| 1  | 6.725276000  | -1.036739000 | 1.867196000  |
| 1  | 5.519532000  | 2.167132000  | -0.736267000 |
| 1  | 7.289404000  | 1.009134000  | 0.569543000  |
| 6  | -3.373015000 | 2.819639000  | 1.474692000  |
| 6  | -4.466153000 | 3.700195000  | 1.528988000  |
| 6  | -2.391451000 | 2.905032000  | 2.486534000  |
| 6  | -4.596261000 | 4.652964000  | 2.529601000  |
| 1  | -5.238170000 | 3.647912000  | 0.765580000  |
| 6  | -2.525217000 | 3.894460000  | 3.471647000  |
| 6  | -3.607874000 | 4.761273000  | 3.500988000  |
| 1  | -5.462190000 | 5.312175000  | 2.539625000  |
| 1  | -1.760363000 | 3.959372000  | 4.245152000  |
| 1  | -3.684536000 | 5.511057000  | 4.286486000  |
| 6  | -1.216173000 | 2.008092000  | 2.647686000  |
| 6  | 0.078674000  | 2.530962000  | 2.562486000  |
| 6  | -1.379159000 | 0.673888000  | 3.041844000  |
| 6  | 1.185642000  | 1.742270000  | 2.864396000  |
| 1  | 0.213525000  | 3.575268000  | 2.277981000  |
| 6  | -0.271908000 | -0.113340000 | 3.351592000  |
| 1  | -2.385221000 | 0.264738000  | 3.145023000  |
| 6  | 1.012550000  | 0.419786000  | 3.265986000  |
| 1  | 2.186144000  | 2.167946000  | 2.799063000  |
| 1  | -0.416888000 | -1.143658000 | 3.675639000  |
| 1  | 1.878534000  | -0.189915000 | 3.521469000  |
| 6  | -6.018514000 | 1.529496000  | -0.815182000 |
| 1  | -6.909009000 | 0.882603000  | -0.819261000 |
| 1  | -6.297257000 | 2.445983000  | -0.282310000 |
| 1  | -5.800340000 | 1.785140000  | -1.860268000 |
| 6  | -5.282605000 | 0.325658000  | 1.250662000  |
| 1  | -5.584718000 | 1.173088000  | 1.878599000  |

|   |              |              |              |
|---|--------------|--------------|--------------|
| 1 | -6.138442000 | -0.361476000 | 1.176623000  |
| 1 | -4.473200000 | -0.212735000 | 1.766088000  |
| 6 | -4.615132000 | -0.501363000 | -0.990366000 |
| 1 | -5.561473000 | -1.053523000 | -1.094693000 |
| 1 | -4.250578000 | -0.277231000 | -2.001528000 |
| 1 | -3.888012000 | -1.168385000 | -0.504510000 |
| 6 | -2.850655000 | 2.034635000  | -2.727576000 |
| 1 | -3.858068000 | 1.702768000  | -3.011987000 |
| 1 | -2.469485000 | 2.663534000  | -3.546129000 |
| 1 | -2.199341000 | 1.149862000  | -2.656258000 |
| 6 | -1.442664000 | 3.392028000  | -1.178997000 |
| 1 | -0.695727000 | 2.584939000  | -1.124213000 |
| 1 | -1.159673000 | 4.062184000  | -2.004511000 |
| 1 | -1.389852000 | 3.972526000  | -0.246735000 |
| 6 | -3.797056000 | 4.045283000  | -1.597999000 |
| 1 | -3.474255000 | 4.624341000  | -2.476439000 |
| 1 | -4.838726000 | 3.748893000  | -1.768884000 |
| 1 | -3.762969000 | 4.721788000  | -0.734825000 |
| 7 | 1.825081000  | -3.146105000 | -1.678146000 |
| 6 | 2.590031000  | -4.050751000 | -0.850926000 |
| 6 | 2.700995000  | -2.300416000 | -2.440328000 |
| 6 | 3.997555000  | -3.766285000 | -1.151563000 |
| 6 | 4.063237000  | -2.723663000 | -2.075351000 |
| 8 | 2.084761000  | -4.826701000 | -0.081215000 |
| 8 | 2.337434000  | -1.452192000 | -3.216792000 |
| 6 | 5.139511000  | -4.334198000 | -0.614008000 |
| 1 | 5.077527000  | -5.143927000 | 0.110344000  |
| 6 | 5.274388000  | -2.205494000 | -2.496966000 |
| 1 | 5.318368000  | -1.385103000 | -3.210426000 |
| 6 | 6.366495000  | -3.819129000 | -1.036911000 |
| 1 | 7.289070000  | -4.234995000 | -0.637410000 |
| 6 | 6.432316000  | -2.771986000 | -1.959198000 |
| 1 | 7.404876000  | -2.390214000 | -2.262562000 |

Zero-point correction= 0.711563  
 (Hartree/Particle)  
 Thermal correction to Energy= 0.753774  
 Thermal correction to Enthalpy= 0.754718  
 Thermal correction to Gibbs Free Energy= 0.636870  
 Sum of electronic and zero-point Energies= -2191.636165  
 Sum of electronic and thermal Energies= -2191.593955  
 Sum of electronic and thermal Enthalpies= -2191.593010  
 Sum of electronic and thermal Free Energies= -2191.710858

E(M06/6-311+G(2d,p))= -2192.86157473

**Intermediate c-VIIIb**

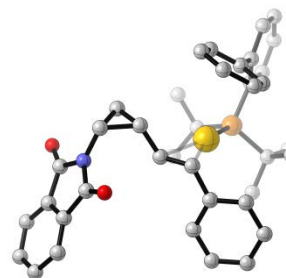

|    |              |              |              |
|----|--------------|--------------|--------------|
| 79 | 0.626833000  | 0.241783000  | -0.254394000 |
| 15 | 2.453780000  | 0.083762000  | 1.238311000  |
| 6  | 2.985929000  | 1.846295000  | 1.669472000  |
| 6  | 1.842895000  | -0.930294000 | 2.726199000  |
| 6  | -1.729153000 | -1.365143000 | -1.645685000 |
| 1  | -1.291933000 | -1.442930000 | -2.642051000 |
| 6  | -1.705003000 | -2.600876000 | -0.787349000 |
| 1  | -1.624728000 | -2.451317000 | 0.288479000  |
| 1  | -1.197082000 | -3.483593000 | -1.171029000 |
| 6  | -1.618224000 | -0.042270000 | -1.015614000 |
| 1  | -2.134428000 | 0.084579000  | -0.057673000 |
| 6  | -1.074685000 | 1.058520000  | -1.636121000 |
| 1  | -0.653197000 | 0.922276000  | -2.638323000 |
| 6  | -1.170585000 | 2.449975000  | -1.160908000 |
| 6  | -0.314978000 | 3.409809000  | -1.718152000 |
| 6  | -2.071878000 | 2.845626000  | -0.162702000 |



|   |              |              |              |
|---|--------------|--------------|--------------|
| 6 | -0.337810000 | 4.725949000  | -1.272080000 |
| 1 | 0.380108000  | 3.106683000  | -2.503067000 |
| 6 | -2.094113000 | 4.162187000  | 0.280438000  |
| 1 | -2.775539000 | 2.126088000  | 0.256467000  |
| 6 | -1.223920000 | 5.104500000  | -0.266091000 |
| 1 | 0.336754000  | 5.458423000  | -1.712142000 |
| 1 | -2.803322000 | 4.459048000  | 1.051214000  |
| 1 | -1.247082000 | 6.135512000  | 0.082106000  |
| 6 | 3.928041000  | -0.783395000 | 0.563869000  |
| 6 | 4.998630000  | -1.046706000 | 1.435328000  |
| 6 | 4.001646000  | -1.278066000 | -0.756801000 |
| 6 | 6.105063000  | -1.785025000 | 1.039786000  |
| 1 | 4.972882000  | -0.678545000 | 2.457530000  |
| 6 | 5.121771000  | -2.032796000 | -1.132739000 |
| 6 | 6.163986000  | -2.289266000 | -0.254057000 |
| 1 | 6.912259000  | -1.968102000 | 1.746183000  |
| 1 | 5.167418000  | -2.413822000 | -2.152633000 |
| 1 | 7.019638000  | -2.877757000 | -0.580210000 |
| 6 | 2.996726000  | -1.073595000 | -1.838010000 |
| 6 | 2.924615000  | 0.138004000  | -2.536327000 |
| 6 | 2.228791000  | -2.156479000 | -2.282589000 |
| 6 | 2.102245000  | 0.261204000  | -3.654621000 |
| 1 | 3.542266000  | 0.978722000  | -2.218319000 |
| 6 | 1.403767000  | -2.030648000 | -3.397677000 |
| 1 | 2.298151000  | -3.109840000 | -1.756587000 |
| 6 | 1.341107000  | -0.822447000 | -4.088769000 |
| 1 | 2.072697000  | 1.203100000  | -4.201223000 |
| 1 | 0.817174000  | -2.885369000 | -3.733139000 |
| 1 | 0.708725000  | -0.729019000 | -4.970467000 |
| 6 | 2.619355000  | -0.729397000 | 4.025792000  |
| 1 | 2.192222000  | -1.402509000 | 4.784364000  |
| 1 | 3.682909000  | -0.979438000 | 3.942462000  |
| 1 | 2.526844000  | 0.294462000  | 4.411009000  |
| 6 | 1.905549000  | -2.398841000 | 2.302809000  |
| 1 | 2.935340000  | -2.770645000 | 2.226894000  |
| 1 | 1.383894000  | -3.005308000 | 3.057656000  |
| 1 | 1.406595000  | -2.572843000 | 1.336220000  |
| 6 | 0.378260000  | -0.566587000 | 2.990568000  |
| 1 | 0.023768000  | -1.157107000 | 3.848609000  |
| 1 | 0.239255000  | 0.493337000  | 3.237773000  |
| 1 | -0.265025000 | -0.804579000 | 2.131271000  |
| 6 | 1.828781000  | 2.548676000  | 2.377993000  |
| 1 | 1.640591000  | 2.136002000  | 3.377736000  |
| 1 | 2.086451000  | 3.610827000  | 2.502859000  |
| 1 | 0.894589000  | 2.500038000  | 1.797168000  |
| 6 | 3.261590000  | 2.555669000  | 0.341996000  |
| 1 | 2.363785000  | 2.610620000  | -0.291535000 |
| 1 | 3.582260000  | 3.586210000  | 0.556094000  |
| 1 | 4.066414000  | 2.071167000  | -0.229103000 |
| 6 | 4.243860000  | 1.932717000  | 2.530250000  |
| 1 | 4.432567000  | 2.993404000  | 2.753361000  |
| 1 | 4.147025000  | 1.408514000  | 3.488499000  |
| 1 | 5.128543000  | 1.549838000  | 2.006632000  |
| 7 | -4.030897000 | -1.673955000 | -0.610903000 |
| 6 | -4.500318000 | -2.261026000 | 0.579776000  |
| 6 | -4.816190000 | -0.570757000 | -0.991107000 |
| 6 | -5.636408000 | -1.415616000 | 1.017808000  |
| 6 | -5.828765000 | -0.407297000 | 0.076999000  |
| 8 | -4.044186000 | -3.250708000 | 1.106053000  |
| 8 | -4.649804000 | 0.086066000  | -1.995138000 |
| 6 | -6.435799000 | -1.522005000 | 2.140706000  |
| 1 | -6.280401000 | -2.314639000 | 2.870461000  |
| 6 | -6.826000000 | 0.539518000  | 0.222555000  |
| 1 | -6.969469000 | 1.324029000  | -0.518168000 |
| 6 | -7.446498000 | -0.570013000 | 2.297825000  |
| 1 | -8.097322000 | -0.616051000 | 3.168774000  |
| 6 | -7.638302000 | 0.442577000  | 1.355421000  |
| 1 | -8.434384000 | 1.168855000  | 1.506995000  |
| 6 | -2.984048000 | -2.195955000 | -1.428799000 |
| 1 | -3.325111000 | -2.761093000 | -2.295998000 |

Zero-point correction= 0.711309  
(Hartree/Particle)  
Thermal correction to Energy= 0.754600  
Thermal correction to Enthalpy= 0.755545  
Thermal correction to Gibbs Free Energy= 0.633331

Sum of electronic and zero-point Energies= -2191.681139  
Sum of electronic and thermal Energies= -2191.637847  
Sum of electronic and thermal Enthalpies= -2191.636903  
Sum of electronic and thermal Free Energies= -2191.759117

E(M06/6-311+G(2d,p))= -2192.90576079

#### Intermediate *t*-VIIIb

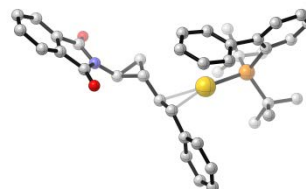

|    |              |              |              |
|----|--------------|--------------|--------------|
| 79 | -0.886893000 | 0.381376000  | -0.326410000 |
| 15 | -2.917691000 | -0.764297000 | -0.723813000 |
| 6  | -4.213536000 | 0.596618000  | -0.971433000 |
| 6  | -2.645328000 | -1.914494000 | -2.207941000 |
| 6  | 2.229498000  | 0.225662000  | -0.635677000 |
| 1  | 2.421068000  | -0.081608000 | 0.392297000  |
| 6  | 2.394283000  | -0.831738000 | -1.690656000 |
| 1  | 1.761734000  | -0.779767000 | -2.576503000 |
| 1  | 2.639509000  | -1.836571000 | -1.350567000 |
| 6  | 3.438087000  | 0.222781000  | -1.542025000 |
| 1  | 3.488275000  | 1.000225000  | -2.305662000 |
| 6  | 1.249112000  | 1.310057000  | -0.790709000 |
| 1  | 1.098078000  | 1.682432000  | -1.809209000 |
| 6  | 0.714717000  | 1.980744000  | 0.285917000  |
| 1  | 1.017988000  | 1.637977000  | 1.283189000  |
| 6  | -0.093238000 | 3.209946000  | 0.268536000  |
| 6  | -0.589207000 | 3.681598000  | 1.491252000  |
| 6  | -0.418055000 | 3.903629000  | -0.906178000 |
| 6  | -1.396305000 | 4.812427000  | 1.542327000  |
| 1  | -0.336179000 | 3.143643000  | 2.406291000  |
| 6  | -1.227319000 | 5.030427000  | -0.853189000 |
| 1  | -0.039643000 | 3.560606000  | -1.869114000 |
| 6  | -1.720952000 | 5.487840000  | 0.369193000  |
| 1  | -1.771822000 | 5.167680000  | 2.500363000  |
| 1  | -1.470217000 | 5.562222000  | -1.771733000 |
| 1  | -2.353087000 | 6.373365000  | 0.403955000  |
| 6  | -3.529072000 | -1.774172000 | 0.685925000  |
| 6  | -4.752603000 | -2.448033000 | 0.535435000  |
| 6  | -2.882968000 | -1.826273000 | 1.941338000  |
| 6  | -5.349883000 | -3.128671000 | 1.587767000  |
| 1  | -5.269145000 | -2.433153000 | -0.420506000 |
| 6  | -3.516465000 | -2.494669000 | 2.998187000  |
| 6  | -4.735050000 | -3.137345000 | 2.833968000  |
| 1  | -6.298100000 | -3.639633000 | 1.432096000  |
| 1  | -3.015673000 | -2.522266000 | 3.965653000  |
| 1  | -5.196750000 | -3.651890000 | 3.674728000  |
| 6  | -1.540667000 | -1.268709000 | 2.262670000  |
| 6  | -1.414604000 | -0.217997000 | 3.178234000  |
| 6  | -0.379696000 | -1.893909000 | 1.787815000  |
| 6  | -0.156900000 | 0.203943000  | 3.604353000  |
| 1  | -2.313727000 | 0.258376000  | 3.571408000  |
| 6  | 0.875602000  | -1.483753000 | 2.229314000  |
| 1  | -0.468617000 | -2.730036000 | 1.092895000  |
| 6  | 0.991052000  | -0.431311000 | 3.135953000  |
| 1  | -0.075804000 | 1.019424000  | 4.322047000  |
| 1  | 1.766732000  | -1.998098000 | 1.869972000  |
| 1  | 1.973540000  | -0.112730000 | 3.482224000  |
| 6  | -3.918256000 | -2.421923000 | -2.879208000 |
| 1  | -3.629467000 | -3.062961000 | -3.725693000 |
| 1  | -4.539942000 | -3.034386000 | -2.215319000 |
| 1  | -4.529425000 | -1.605971000 | -3.285298000 |
| 6  | -1.829448000 | -3.095415000 | -1.678839000 |
| 1  | -2.382761000 | -3.692158000 | -0.941551000 |
| 1  | -1.577676000 | -3.754764000 | -2.522645000 |
| 1  | -0.881986000 | -2.766942000 | -1.223738000 |

|   |              |              |              |
|---|--------------|--------------|--------------|
| 6 | -1.805802000 | -1.180375000 | -3.256293000 |
| 1 | -1.582297000 | -1.882300000 | -4.073500000 |
| 1 | -2.329419000 | -0.321998000 | -3.694629000 |
| 1 | -0.847913000 | -0.826935000 | -2.846097000 |
| 6 | -3.840216000 | 1.415806000  | -2.206084000 |
| 1 | -4.032214000 | 0.873692000  | -3.141326000 |
| 1 | -4.459754000 | 2.324990000  | -2.222782000 |
| 1 | -2.787017000 | 1.734534000  | -2.194300000 |
| 6 | -4.115259000 | 1.489019000  | 0.269929000  |
| 1 | -3.124166000 | 1.958290000  | 0.368663000  |
| 1 | -4.862715000 | 2.291845000  | 0.184411000  |
| 1 | -4.329918000 | 0.934971000  | 1.195312000  |
| 6 | -5.658370000 | 0.119343000  | -1.099439000 |
| 1 | -6.286564000 | 0.993454000  | -1.326880000 |
| 1 | -5.804302000 | -0.607296000 | -1.907281000 |
| 1 | -6.034310000 | -0.314288000 | -0.165041000 |
| 7 | 4.685526000  | -0.122687000 | -0.945021000 |
| 6 | 5.226738000  | 0.529923000  | 0.175534000  |
| 6 | 5.563339000  | -1.092154000 | -1.462299000 |
| 6 | 6.541642000  | -0.110241000 | 0.413654000  |
| 6 | 6.742930000  | -1.080526000 | -0.564717000 |
| 8 | 4.690107000  | 1.423722000  | 0.792604000  |
| 8 | 5.355414000  | -1.769918000 | -2.443153000 |
| 6 | 7.480326000  | 0.131996000  | 1.399418000  |
| 1 | 7.316103000  | 0.894232000  | 2.159086000  |
| 6 | 7.891476000  | -1.849372000 | -0.596658000 |
| 1 | 8.040569000  | -2.606229000 | -1.364548000 |
| 6 | 8.644329000  | -0.640532000 | 1.376690000  |
| 1 | 9.408591000  | -0.482954000 | 2.135298000  |
| 6 | 8.846291000  | -1.614180000 | 0.396307000  |
| 1 | 9.764128000  | -2.198732000 | 0.406918000  |

Zero-point correction= 0.713708  
(Hartree/Particle)  
Thermal correction to Energy= 0.756419  
Thermal correction to Enthalpy= 0.757364  
Thermal correction to Gibbs Free Energy= 0.636897  
Sum of electronic and zero-point Energies= -2191.678331  
Sum of electronic and thermal Energies= -2191.635619  
Sum of electronic and thermal Enthalpies= -2191.634675  
Sum of electronic and thermal Free Energies= -2191.755142

E(M06/6-311+G(2d,p))= -2192.90573305

Transition state TS<sub>c-VIIIb-z-VIIIb</sub>

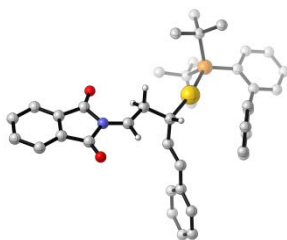

|    |              |              |              |
|----|--------------|--------------|--------------|
| 79 | -2.139693000 | -0.859656000 | -0.367786000 |
| 15 | -4.242299000 | 0.163917000  | -0.953832000 |
| 6  | -3.958668000 | 2.029392000  | -0.746689000 |
| 6  | -4.647822000 | -0.324460000 | -2.751973000 |
| 6  | -0.118032000 | -1.493509000 | -0.059416000 |
| 1  | -0.087858000 | -2.581372000 | 0.114312000  |
| 6  | 0.716415000  | -1.147802000 | -1.293307000 |
| 1  | 0.653368000  | -0.087053000 | -1.579727000 |
| 1  | 0.367509000  | -1.693085000 | -2.192604000 |
| 6  | 2.125926000  | -1.532521000 | -1.124086000 |
| 1  | 2.383458000  | -2.294075000 | -0.375506000 |
| 6  | 0.346457000  | -0.768232000 | 1.139469000  |
| 1  | 0.466513000  | 0.316341000  | 1.015185000  |
| 6  | 0.587211000  | -1.317901000 | 2.347398000  |
| 1  | 0.510121000  | -2.407061000 | 2.438419000  |
| 6  | 0.911549000  | -0.609344000 | 3.582104000  |
| 6  | 1.340379000  | -1.342219000 | 4.700641000  |
| 6  | 0.786038000  | 0.783879000  | 3.722893000  |

|   |              |              |              |
|---|--------------|--------------|--------------|
| 6 | 1.651842000  | -0.713539000 | 5.900802000  |
| 1 | 1.430210000  | -2.426721000 | 4.616166000  |
| 6 | 1.103768000  | 1.412519000  | 4.919530000  |
| 1 | 0.417391000  | 1.381131000  | 2.888274000  |
| 6 | 1.539884000  | 0.669736000  | 6.016497000  |
| 1 | 1.980869000  | -1.308455000 | 6.752096000  |
| 1 | 0.997263000  | 2.493653000  | 5.002825000  |
| 1 | 1.779283000  | 1.165868000  | 6.955778000  |
| 6 | -5.747958000 | -0.167588000 | 0.065515000  |
| 6 | -6.989498000 | 0.302042000  | -0.393715000 |
| 6 | -5.699096000 | -0.786482000 | 1.334322000  |
| 6 | -8.150419000 | 0.185177000  | 0.358291000  |
| 1 | -7.056815000 | 0.786383000  | -1.363943000 |
| 6 | -6.877420000 | -0.873479000 | 2.091163000  |
| 6 | -8.091927000 | -0.400296000 | 1.617769000  |
| 1 | -9.092251000 | 0.560595000  | -0.037644000 |
| 1 | -6.825238000 | -1.346075000 | 3.071895000  |
| 1 | -8.988474000 | -0.491639000 | 2.228405000  |
| 6 | -4.493469000 | -1.376404000 | 1.974574000  |
| 6 | -3.984327000 | -0.801347000 | 3.144077000  |
| 6 | -3.933939000 | -2.572923000 | 1.513070000  |
| 6 | -2.934416000 | -1.401069000 | 3.833408000  |
| 1 | -4.427496000 | 0.121983000  | 3.520049000  |
| 6 | -2.889674000 | -3.179637000 | 2.208464000  |
| 1 | -4.340998000 | -3.046744000 | 0.618731000  |
| 6 | -2.387826000 | -2.595277000 | 3.368774000  |
| 1 | -2.549687000 | -0.942014000 | 4.743410000  |
| 1 | -2.472645000 | -4.117048000 | 1.840655000  |
| 1 | -1.578375000 | -3.076087000 | 3.916842000  |
| 6 | -5.475187000 | 0.670500000  | -3.565240000 |
| 1 | -5.626054000 | 0.249458000  | -4.571185000 |
| 1 | -6.470545000 | 0.862696000  | -3.149932000 |
| 1 | -4.960304000 | 1.631489000  | -3.691085000 |
| 6 | -5.367988000 | -1.672681000 | -2.694192000 |
| 1 | -6.381584000 | -1.593552000 | -2.280796000 |
| 1 | -5.454687000 | -2.075338000 | -3.714670000 |
| 1 | -4.810285000 | -2.409841000 | -2.097114000 |
| 6 | -3.317961000 | -0.528557000 | -3.488100000 |
| 1 | -3.533040000 | -0.811119000 | -4.529919000 |
| 1 | -2.702918000 | 0.380865000  | -3.511370000 |
| 1 | -2.720237000 | -1.332456000 | -3.035914000 |
| 6 | -2.825252000 | 2.461593000  | -1.676380000 |
| 1 | -3.116728000 | 2.437714000  | -2.734972000 |
| 1 | -2.545275000 | 3.498781000  | -1.436849000 |
| 1 | -1.929041000 | 1.835011000  | -1.549599000 |
| 6 | -3.507937000 | 2.219080000  | 0.704323000  |
| 1 | -2.575587000 | 1.675815000  | 0.924091000  |
| 1 | -3.326714000 | 3.289736000  | 0.884731000  |
| 1 | -4.274250000 | 1.887711000  | 1.419751000  |
| 6 | -5.182211000 | 2.909474000  | -0.987333000 |
| 1 | -4.888147000 | 3.960462000  | -0.843415000 |
| 1 | -5.584432000 | 2.818048000  | -2.003458000 |
| 1 | -5.989004000 | 2.697853000  | -0.274162000 |
| 7 | 3.155744000  | -1.070758000 | -1.771759000 |
| 6 | 4.538679000  | -1.537401000 | -1.480185000 |
| 6 | 3.190150000  | -0.049048000 | -2.838215000 |
| 6 | 5.385359000  | -0.765214000 | -2.377483000 |
| 6 | 4.606223000  | 0.095488000  | -3.160519000 |
| 8 | 4.763487000  | -2.373761000 | -0.656407000 |
| 8 | 2.210230000  | 0.478234000  | -3.279670000 |
| 6 | 6.765238000  | -0.810295000 | -2.502363000 |
| 1 | 7.362659000  | -1.480350000 | -1.888398000 |
| 6 | 5.181105000  | 0.939714000  | -4.097342000 |
| 1 | 4.569676000  | 1.604279000  | -4.703557000 |
| 6 | 7.346488000  | 0.038578000  | -3.442226000 |
| 1 | 8.426175000  | 0.034365000  | -3.571856000 |
| 6 | 6.568164000  | 0.898032000  | -4.225936000 |
| 1 | 7.057527000  | 1.545846000  | -4.949557000 |

Zero-point correction= 0.708373  
(Hartree/Particle)  
Thermal correction to Energy= 0.751434  
Thermal correction to Enthalpy= 0.752378  
Thermal correction to Gibbs Free Energy= 0.630302  
Sum of electronic and zero-point Energies= -2191.618431  
Sum of electronic and thermal Energies= -2191.575370

Sum of electronic and thermal Enthalpies= -2191.574426  
 Sum of electronic and thermal Free Energies= -2191.696502

E(M06/6-311+G(2d,p))= -2192.84162580

**Intermediate c-IXb**

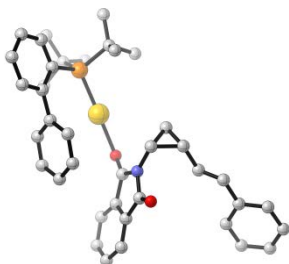

|    |              |              |              |
|----|--------------|--------------|--------------|
| 79 | 1.303614000  | -0.991434000 | 0.576692000  |
| 15 | 3.102250000  | -2.441391000 | 0.449534000  |
| 6  | 3.187043000  | -3.420024000 | 2.061998000  |
| 6  | 4.635587000  | -1.377964000 | 0.091394000  |
| 6  | 0.639499000  | 1.890068000  | -1.419011000 |
| 1  | 0.996249000  | 1.328780000  | -2.282991000 |
| 6  | 1.629248000  | 2.317916000  | -0.387863000 |
| 1  | 1.301588000  | 2.375075000  | 0.649543000  |
| 1  | 2.660012000  | 1.998154000  | -0.528273000 |
| 6  | 2.953061000  | -3.657059000 | -0.922339000 |
| 6  | 4.061066000  | -4.482678000 | -1.178979000 |
| 6  | 1.832776000  | -3.750481000 | -1.778275000 |
| 6  | 4.092209000  | -5.358156000 | -2.255120000 |
| 1  | 4.929940000  | -4.444108000 | -0.527600000 |
| 6  | 1.889561000  | -4.633854000 | -2.865508000 |
| 6  | 3.001368000  | -5.425925000 | -3.113239000 |
| 1  | 4.970841000  | -5.977617000 | -2.423345000 |
| 1  | 1.022981000  | -4.695360000 | -3.523472000 |
| 1  | 3.009769000  | -6.098887000 | -3.968717000 |
| 6  | 0.541813000  | -3.016573000 | -1.639770000 |
| 6  | -0.433572000 | -3.452408000 | -0.734276000 |
| 6  | 0.221636000  | -1.988591000 | -2.534060000 |
| 6  | -1.699313000 | -2.871203000 | -0.723417000 |
| 1  | -0.204222000 | -4.270419000 | -0.050459000 |
| 6  | -1.041962000 | -1.400975000 | -2.516799000 |
| 1  | 0.969942000  | -1.658959000 | -3.256567000 |
| 6  | -2.008656000 | -1.848267000 | -1.617945000 |
| 1  | -2.452509000 | -3.232864000 | -0.024502000 |
| 1  | -1.275786000 | -0.601116000 | -3.219996000 |
| 1  | -3.007973000 | -1.413082000 | -1.624747000 |
| 6  | 5.978879000  | -2.047762000 | 0.369735000  |
| 1  | 6.774952000  | -1.319201000 | 0.155020000  |
| 1  | 6.170277000  | -2.920948000 | -0.263599000 |
| 1  | 6.082352000  | -2.340743000 | 1.422482000  |
| 6  | 4.540319000  | -0.979716000 | -1.383120000 |
| 1  | 4.700244000  | -1.829142000 | -2.059298000 |
| 1  | 5.316925000  | -0.230522000 | -1.596527000 |
| 1  | 3.566064000  | -0.525937000 | -1.624813000 |
| 6  | 4.564043000  | -0.106497000 | 0.943322000  |
| 1  | 5.378455000  | 0.563569000  | 0.630654000  |
| 1  | 4.697778000  | -0.306269000 | 2.013072000  |
| 1  | 3.614350000  | 0.430350000  | 0.814881000  |
| 6  | 3.497740000  | -2.455748000 | 3.204393000  |
| 1  | 4.531639000  | -2.089431000 | 3.165275000  |
| 1  | 3.375242000  | -2.990739000 | 4.157629000  |
| 1  | 2.818076000  | -1.591055000 | 3.218303000  |
| 6  | 1.795350000  | -4.019508000 | 2.270099000  |
| 1  | 1.017885000  | -3.244884000 | 2.340279000  |
| 1  | 1.794036000  | -4.588739000 | 3.211548000  |
| 1  | 1.524724000  | -4.715154000 | 1.463283000  |
| 6  | 4.204833000  | -4.558315000 | 2.065066000  |
| 1  | 4.193156000  | -5.018397000 | 3.064324000  |
| 1  | 5.231186000  | -4.222747000 | 1.873331000  |
| 1  | 3.949313000  | -5.345004000 | 1.344689000  |
| 6  | 1.070757000  | 3.346655000  | -1.332363000 |
| 1  | 1.714818000  | 3.673451000  | -2.148807000 |
| 6  | 0.134060000  | 4.355681000  | -0.817554000 |

|   |              |              |              |
|---|--------------|--------------|--------------|
| 1 | -0.511173000 | 4.039873000  | 0.009502000  |
| 6 | 0.046838000  | 5.608212000  | -1.285386000 |
| 1 | 0.733091000  | 5.920199000  | -2.078374000 |
| 6 | -0.882085000 | 6.635870000  | -0.812155000 |
| 6 | -0.624369000 | 7.980449000  | -1.111098000 |
| 6 | -2.036090000 | 6.329738000  | -0.074774000 |
| 6 | -1.472687000 | 8.989239000  | -0.667962000 |
| 1 | 0.261922000  | 8.230405000  | -1.695616000 |
| 6 | -2.883327000 | 7.336643000  | 0.368674000  |
| 1 | -2.283878000 | 5.288184000  | 0.133660000  |
| 6 | -2.604219000 | 8.671635000  | 0.078171000  |
| 1 | -1.249307000 | 10.027859000 | -0.907984000 |
| 1 | -3.775407000 | 7.078388000  | 0.937952000  |
| 1 | -3.272662000 | 9.458417000  | 0.424235000  |
| 7 | -0.703694000 | 1.576258000  | -1.031103000 |
| 6 | -1.820465000 | 2.040504000  | -1.791610000 |
| 6 | -1.125370000 | 0.908197000  | 0.090218000  |
| 6 | -3.018406000 | 1.664046000  | -1.014107000 |
| 8 | -1.722837000 | 2.597070000  | -2.855529000 |
| 6 | -2.594588000 | 0.994865000  | 0.132009000  |
| 8 | -0.419486000 | 0.326459000  | 0.923261000  |
| 6 | -4.359415000 | 1.829749000  | -1.301989000 |
| 6 | -3.491324000 | 0.461452000  | 1.039215000  |
| 1 | -4.683934000 | 2.342832000  | -2.205175000 |
| 6 | -5.276229000 | 1.304959000  | -0.385647000 |
| 1 | -3.154539000 | -0.073231000 | 1.925480000  |
| 6 | -4.850549000 | 0.634395000  | 0.762439000  |
| 1 | -6.342413000 | 1.415616000  | -0.572550000 |
| 1 | -5.591539000 | 0.234676000  | 1.451620000  |

Zero-point correction= 0.712946  
 (Hartree/Particle)

Thermal correction to Energy= 0.755736  
 Thermal correction to Enthalpy= 0.756680  
 Thermal correction to Gibbs Free Energy= 0.636403  
 Sum of electronic and zero-point Energies= -2191.666222  
 Sum of electronic and thermal Energies= -2191.623432  
 Sum of electronic and thermal Enthalpies= -2191.622488  
 Sum of electronic and thermal Free Energies= -2191.742766

E(M06/6-311+G(2d,p))= -2192.89004110

**Transition state TS<sub>c-(IXb-Xb)</sub>**

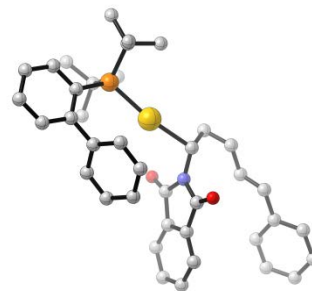

|    |              |              |              |
|----|--------------|--------------|--------------|
| 79 | -2.031660000 | 0.337029000  | 0.436243000  |
| 15 | -3.335763000 | 2.281768000  | 0.113912000  |
| 6  | -3.169056000 | 2.706936000  | -1.723674000 |
| 6  | -5.110053000 | 1.849632000  | 0.650317000  |
| 6  | -1.083020000 | -1.698724000 | 0.488694000  |
| 1  | -1.386707000 | -1.881425000 | 1.524637000  |
| 6  | -1.887214000 | -2.369737000 | -0.687113000 |
| 1  | -1.427855000 | -2.153558000 | -1.653000000 |
| 1  | -2.950259000 | -2.133337000 | -0.655732000 |
| 6  | -2.821006000 | 3.813812000  | 0.993815000  |
| 6  | -3.655111000 | 4.940622000  | 0.906930000  |
| 6  | -1.581015000 | 3.946856000  | 1.656254000  |
| 6  | -3.284028000 | 6.172466000  | 1.428501000  |
| 1  | -4.619622000 | 4.863948000  | 0.411529000  |
| 6  | -1.209679000 | 5.206333000  | 2.147042000  |
| 6  | -2.043557000 | 6.310020000  | 2.040112000  |
| 1  | -3.961487000 | 7.020269000  | 1.347195000  |
| 1  | -0.245262000 | 5.302428000  | 2.645343000  |
| 1  | -1.726679000 | 7.271296000  | 2.440584000  |
| 6  | -0.615804000 | 2.846661000  | 1.922438000  |



|   |              |              |              |
|---|--------------|--------------|--------------|
| 6 | 0.636928000  | 2.842255000  | 1.301788000  |
| 6 | -0.896732000 | 1.871813000  | 2.887870000  |
| 6 | 1.585010000  | 1.875502000  | 1.628255000  |
| 1 | 0.869362000  | 3.609862000  | 0.563025000  |
| 6 | 0.056717000  | 0.914595000  | 3.225758000  |
| 1 | -1.862030000 | 1.886145000  | 3.396015000  |
| 6 | 1.299946000  | 0.915072000  | 2.595600000  |
| 1 | 2.558816000  | 1.888980000  | 1.140080000  |
| 1 | -0.167944000 | 0.169904000  | 3.988647000  |
| 1 | 2.052220000  | 0.177899000  | 2.874336000  |
| 6 | -6.222029000 | 2.632019000  | -0.046374000 |
| 1 | -7.183916000 | 2.312007000  | 0.381802000  |
| 1 | -6.154620000 | 3.716606000  | 0.095895000  |
| 1 | -6.261122000 | 2.422427000  | -1.123169000 |
| 6 | -5.179125000 | 2.071084000  | 2.161658000  |
| 1 | -5.141605000 | 3.133120000  | 2.434995000  |
| 1 | -6.129926000 | 1.663245000  | 2.536074000  |
| 1 | -4.365889000 | 1.550087000  | 2.689799000  |
| 6 | -5.343892000 | 0.360036000  | 0.375320000  |
| 1 | -6.377912000 | 0.109827000  | 0.656974000  |
| 1 | -5.217294000 | 0.097292000  | -0.683331000 |
| 1 | -4.671523000 | -0.273889000 | 0.971102000  |
| 6 | -3.633033000 | 1.505111000  | -2.544660000 |
| 1 | -4.714173000 | 1.332286000  | -2.458561000 |
| 1 | -3.413675000 | 1.696318000  | -3.605856000 |
| 1 | -3.104561000 | 0.582659000  | -2.256389000 |
| 6 | -1.674014000 | 2.930654000  | -1.965490000 |
| 1 | -1.073180000 | 2.042866000  | -1.718211000 |
| 1 | -1.519524000 | 3.151724000  | -3.032345000 |
| 1 | -1.287231000 | 3.784986000  | -1.391965000 |
| 6 | -3.920701000 | 3.956608000  | -2.174937000 |
| 1 | -3.723041000 | 4.106397000  | -3.247000000 |
| 1 | -5.006215000 | 3.873231000  | -2.051043000 |
| 1 | -3.576541000 | 4.858827000  | -1.654059000 |
| 6 | -1.440341000 | -3.524628000 | 0.027214000  |
| 1 | -2.067302000 | -3.922304000 | 0.825285000  |
| 6 | -0.228962000 | -4.219068000 | -0.297689000 |
| 1 | 0.298900000  | -3.915057000 | -1.205186000 |
| 6 | 0.259536000  | -5.208145000 | 0.485374000  |
| 1 | -0.328533000 | -5.502953000 | 1.359688000  |
| 6 | 1.511260000  | -5.918522000 | 0.297903000  |
| 6 | 1.739656000  | -7.096269000 | 1.026324000  |
| 6 | 2.522459000  | -5.446426000 | -0.556843000 |
| 6 | 2.929126000  | -7.798622000 | 0.884859000  |
| 1 | 0.965584000  | -7.458503000 | 1.703284000  |
| 6 | 3.714685000  | -6.142264000 | -0.686945000 |
| 1 | 2.381577000  | -4.511218000 | -1.099039000 |
| 6 | 3.918686000  | -7.323552000 | 0.027177000  |
| 1 | 3.089809000  | -8.715476000 | 1.449152000  |
| 1 | 4.494852000  | -5.756051000 | -1.341135000 |
| 1 | 4.856499000  | -7.866440000 | -0.077922000 |
| 7 | 0.330470000  | -1.593736000 | 0.371868000  |
| 6 | 1.208068000  | -2.122366000 | 1.343713000  |
| 6 | 1.026733000  | -1.098974000 | -0.738996000 |
| 6 | 2.565169000  | -1.999272000 | 0.767926000  |
| 8 | 0.862648000  | -2.559966000 | 2.418314000  |
| 6 | 2.457540000  | -1.383812000 | -0.477746000 |
| 8 | 0.519281000  | -0.575670000 | -1.710071000 |
| 6 | 3.782044000  | -2.421728000 | 1.268536000  |
| 6 | 3.566746000  | -1.161721000 | -1.272213000 |
| 1 | 3.854129000  | -2.908864000 | 2.239319000  |
| 6 | 4.909064000  | -2.210739000 | 0.467551000  |
| 1 | 3.476401000  | -0.681244000 | -2.244735000 |
| 6 | 4.803056000  | -1.591068000 | -0.778505000 |
| 1 | 5.885359000  | -2.538561000 | 0.818976000  |
| 1 | 5.700113000  | -1.440036000 | -1.375642000 |

Zero-point correction= 0.711463  
(Hartree/Particle)  
Thermal correction to Energy= 0.753762  
Thermal correction to Enthalpy= 0.754706  
Thermal correction to Gibbs Free Energy= 0.636382  
Sum of electronic and zero-point Energies= -2191.641256  
Sum of electronic and thermal Energies= -2191.598956  
Sum of electronic and thermal Enthalpies= -2191.598012  
Sum of electronic and thermal Free Energies= -2191.716337

E(M06/6-311+G(2d,p))= -2192.86421689

### Intermediate c-Xb

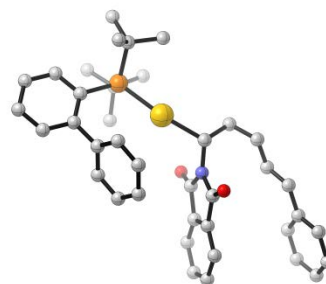

|    |              |              |              |
|----|--------------|--------------|--------------|
| 79 | 2.145862000  | -0.290267000 | -0.522192000 |
| 15 | 3.354372000  | -2.313405000 | -0.110116000 |
| 6  | 3.123572000  | -2.668549000 | 1.736486000  |
| 6  | 5.168921000  | -2.011706000 | -0.595225000 |
| 6  | 1.255307000  | 1.655730000  | -0.722140000 |
| 1  | 1.448293000  | 1.987231000  | -1.750771000 |
| 6  | 1.982607000  | 2.628333000  | 0.299357000  |
| 1  | 1.716130000  | 2.356957000  | 1.326889000  |
| 1  | 3.060555000  | 2.528904000  | 0.145112000  |
| 6  | 2.793652000  | -3.859668000 | -0.945955000 |
| 6  | 3.564110000  | -5.024789000 | -0.793700000 |
| 6  | 1.569046000  | -3.957637000 | -1.643176000 |
| 6  | 3.148994000  | -6.254629000 | -1.286014000 |
| 1  | 4.511230000  | -4.982275000 | -0.262119000 |
| 6  | 1.152028000  | -5.213682000 | -2.107036000 |
| 6  | 1.924124000  | -6.353143000 | -1.935550000 |
| 1  | 3.777834000  | -7.132301000 | -1.149306000 |
| 1  | 0.200363000  | -5.278803000 | -2.634179000 |
| 1  | 1.573030000  | -7.310904000 | -2.315638000 |
| 6  | 0.660183000  | -2.826455000 | -1.972414000 |
| 6  | -0.612766000 | -2.761648000 | -1.397395000 |
| 6  | 1.007342000  | -1.888183000 | -2.951544000 |
| 6  | -1.515039000 | -1.773215000 | -1.782070000 |
| 1  | -0.898176000 | -3.500530000 | -0.647770000 |
| 6  | 0.101354000  | -0.905757000 | -3.344341000 |
| 1  | 1.988213000  | -1.947958000 | -3.425289000 |
| 6  | -1.161195000 | -0.844809000 | -2.758435000 |
| 1  | -2.505258000 | -1.740563000 | -1.328953000 |
| 1  | 0.383043000  | -0.189178000 | -4.115228000 |
| 1  | -1.872200000 | -0.081452000 | -3.074283000 |
| 6  | 6.211823000  | -2.841329000 | 0.150642000  |
| 1  | 7.206352000  | -2.572952000 | -0.237340000 |
| 1  | 6.096460000  | -3.922155000 | 0.009926000  |
| 1  | 6.215175000  | -2.628245000 | 1.227041000  |
| 6  | 5.272462000  | -2.271562000 | -2.098208000 |
| 1  | 5.187114000  | -3.336650000 | -2.347693000 |
| 1  | 6.253701000  | -1.922567000 | -2.453583000 |
| 1  | 4.503081000  | -1.722938000 | -2.662554000 |
| 6  | 5.481879000  | -0.531225000 | -0.346127000 |
| 1  | 6.533672000  | -0.345006000 | -0.611777000 |
| 1  | 5.347899000  | -0.238063000 | 0.703566000  |
| 1  | 4.855880000  | 0.126016000  | -0.966314000 |
| 6  | 3.679181000  | -1.487015000 | 2.531173000  |
| 1  | 4.775152000  | -1.430733000 | 2.485084000  |
| 1  | 3.400502000  | -1.608212000 | 3.588940000  |
| 1  | 3.265254000  | -0.526977000 | 2.184834000  |
| 6  | 1.609481000  | -2.746079000 | 1.951629000  |
| 1  | 1.100138000  | -1.816413000 | 1.655991000  |
| 1  | 1.411885000  | -2.917628000 | 3.020808000  |
| 1  | 1.158768000  | -3.580926000 | 1.395599000  |
| 6  | 3.745929000  | -3.965850000 | 2.245733000  |
| 1  | 3.542545000  | -4.044339000 | 3.324604000  |
| 1  | 4.833701000  | -4.004569000 | 2.114123000  |
| 1  | 3.303562000  | -4.849724000 | 1.768896000  |
| 6  | 1.447935000  | 3.904091000  | -0.137203000 |
| 1  | 1.910700000  | 4.383858000  | -1.003944000 |
| 6  | 0.251580000  | 4.421121000  | 0.341183000  |
| 1  | -0.198604000 | 3.966953000  | 1.226728000  |
| 6  | -0.399329000 | 5.426082000  | -0.345874000 |

|                                              |              |             |              |
|----------------------------------------------|--------------|-------------|--------------|
| 1                                            | 0.101031000  | 5.828504000 | -1.231738000 |
| 6                                            | -1.693742000 | 5.956964000 | -0.061174000 |
| 6                                            | -2.244754000 | 6.891119000 | -0.962183000 |
| 6                                            | -2.455248000 | 5.546874000 | 1.055811000  |
| 6                                            | -3.520244000 | 7.391731000 | -0.762528000 |
| 1                                            | -1.654082000 | 7.204384000 | -1.822282000 |
| 6                                            | -3.727101000 | 6.050920000 | 1.249643000  |
| 1                                            | -2.039711000 | 4.838450000 | 1.770415000  |
| 6                                            | -4.261049000 | 6.969808000 | 0.341039000  |
| 1                                            | -3.941463000 | 8.108989000 | -1.463357000 |
| 1                                            | -4.312789000 | 5.735206000 | 2.110335000  |
| 1                                            | -5.264245000 | 7.362046000 | 0.498097000  |
| 7                                            | -0.177123000 | 1.654576000 | -0.568935000 |
| 6                                            | -1.054758000 | 2.239092000 | -1.499461000 |
| 6                                            | -0.869000000 | 1.160850000 | 0.543153000  |
| 6                                            | -2.413226000 | 2.109251000 | -0.923203000 |
| 8                                            | -0.721127000 | 2.741482000 | -2.551891000 |
| 6                                            | -2.303511000 | 1.455847000 | 0.301323000  |
| 8                                            | -0.362992000 | 0.627341000 | 1.510007000  |
| 6                                            | -3.632362000 | 2.539355000 | -1.412202000 |
| 6                                            | -3.413641000 | 1.190957000 | 1.081320000  |
| 1                                            | -3.705024000 | 3.060614000 | -2.365384000 |
| 6                                            | -4.762106000 | 2.276041000 | -0.630972000 |
| 1                                            | -3.321625000 | 0.677820000 | 2.036985000  |
| 6                                            | -4.654425000 | 1.612406000 | 0.592284000  |
| 1                                            | -5.741807000 | 2.597849000 | -0.978847000 |
| 1                                            | -5.553512000 | 1.420119000 | 1.174621000  |
| Zero-point correction=                       |              |             | 0.712434     |
| (Hartree/Particle)                           |              |             |              |
| Thermal correction to Energy=                |              |             | 0.755212     |
| Thermal correction to Enthalpy=              |              |             | 0.756156     |
| Thermal correction to Gibbs Free Energy=     |              |             | 0.636677     |
| Sum of electronic and zero-point Energies=   |              |             | -2191.645258 |
| Sum of electronic and thermal Energies=      |              |             | -2191.602480 |
| Sum of electronic and thermal Enthalpies=    |              |             | -2191.601536 |
| Sum of electronic and thermal Free Energies= |              |             | -2191.721015 |

E(M06/6-311+G(2d,p))= -2192.86947838

#### Transition state TS<sub>c-Xb-r-Xb</sub>

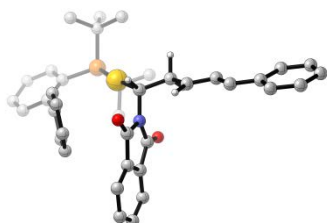

|    |              |              |              |
|----|--------------|--------------|--------------|
| 79 | 1.685168000  | -0.349324000 | -0.684118000 |
| 15 | 3.167607000  | -2.141103000 | -0.041546000 |
| 6  | 2.760271000  | -2.511247000 | 1.773291000  |
| 6  | 4.961789000  | -1.552991000 | -0.297416000 |
| 6  | 0.458462000  | 1.343753000  | -1.058861000 |
| 1  | 0.615006000  | 1.669856000  | -2.096474000 |
| 6  | 0.751137000  | 2.523430000  | -0.139313000 |
| 1  | 0.622825000  | 2.261774000  | 0.925286000  |
| 1  | 1.819935000  | 2.799437000  | -0.217136000 |
| 6  | 3.008348000  | -3.789216000 | -0.860770000 |
| 6  | 3.941981000  | -4.788020000 | -0.540113000 |
| 6  | 1.925003000  | -4.135089000 | -1.697796000 |
| 6  | 3.817527000  | -6.092720000 | -0.997349000 |
| 1  | 4.788817000  | -4.546155000 | 0.096828000  |
| 6  | 1.795670000  | -5.466153000 | -2.122226000 |
| 6  | 2.722990000  | -6.439456000 | -1.780933000 |
| 1  | 4.567534000  | -6.834639000 | -0.729600000 |
| 1  | 0.949548000  | -5.724187000 | -2.758875000 |
| 1  | 2.597460000  | -7.460418000 | -2.137412000 |
| 6  | 0.901797000  | -3.197031000 | -2.232659000 |
| 6  | -0.445918000 | -3.352699000 | -1.890752000 |
| 6  | 1.248968000  | -2.239820000 | -3.193063000 |

|   |              |              |              |
|---|--------------|--------------|--------------|
| 6 | -1.425532000 | -2.568007000 | -2.494546000 |
| 1 | -0.725786000 | -4.106753000 | -1.153931000 |
| 6 | 0.268749000  | -1.461788000 | -3.803642000 |
| 1 | 2.295557000  | -2.125398000 | -3.479005000 |
| 6 | -1.070768000 | -1.627050000 | -3.458426000 |
| 1 | -2.473032000 | -2.706803000 | -2.225522000 |
| 1 | 0.552944000  | -0.726391000 | -4.555741000 |
| 1 | -1.836547000 | -1.023520000 | -3.944601000 |
| 6 | 6.023853000  | -2.158677000 | 0.618966000  |
| 1 | 7.000401000  | -1.735000000 | 0.338192000  |
| 1 | 6.115931000  | -3.247455000 | 0.532150000  |
| 1 | 5.853228000  | -1.906182000 | 1.673560000  |
| 6 | 5.313399000  | -1.839559000 | -1.758640000 |
| 1 | 5.412421000  | -2.912642000 | -1.966956000 |
| 1 | 6.277130000  | -1.362177000 | -1.991864000 |
| 1 | 4.564351000  | -1.424232000 | -2.450147000 |
| 6 | 4.993661000  | -0.033805000 | -0.094772000 |
| 1 | 6.018478000  | 0.322655000  | -0.280862000 |
| 1 | 4.721222000  | 0.260728000  | 0.927122000  |
| 1 | 4.321301000  | 0.487713000  | -0.790403000 |
| 6 | 2.966060000  | -1.228804000 | 2.579399000  |
| 1 | 4.027655000  | -0.959933000 | 2.669703000  |
| 1 | 2.576426000  | -1.380764000 | 3.597642000  |
| 1 | 2.426930000  | -0.374958000 | 2.139947000  |
| 6 | 1.274659000  | -2.879854000 | 1.786582000  |
| 1 | 0.643536000  | -2.072174000 | 1.389064000  |
| 1 | 0.964849000  | -3.073116000 | 2.825053000  |
| 1 | 1.074221000  | -3.791761000 | 1.205559000  |
| 6 | 3.538480000  | -3.650845000 | 2.425417000  |
| 1 | 3.205008000  | -3.739695000 | 3.470756000  |
| 1 | 4.621364000  | -3.481877000 | 2.441494000  |
| 1 | 3.343355000  | -4.615721000 | 1.941405000  |
| 6 | -0.037384000 | 3.740499000  | -0.422391000 |
| 1 | -0.654821000 | 3.746911000  | -1.328556000 |
| 6 | -0.037320000 | 4.864928000  | 0.363185000  |
| 1 | 0.563363000  | 4.883382000  | 1.273264000  |
| 6 | -0.822141000 | 5.952173000  | -0.018174000 |
| 1 | -1.392672000 | 5.834713000  | -0.943555000 |
| 6 | -0.979220000 | 7.191262000  | 0.649658000  |
| 6 | -1.868809000 | 8.134710000  | 0.083793000  |
| 6 | -0.292085000 | 7.517268000  | 1.844288000  |
| 6 | -2.067895000 | 9.360975000  | 0.688802000  |
| 1 | -2.396961000 | 7.875430000  | -0.832972000 |
| 6 | -0.493664000 | 8.745789000  | 2.439069000  |
| 1 | 0.398272000  | 6.806609000  | 2.293018000  |
| 6 | -1.379057000 | 9.664520000  | 1.864054000  |
| 1 | -2.754876000 | 10.083496000 | 0.255048000  |
| 1 | 0.035751000  | 9.001615000  | 3.353834000  |
| 1 | -1.531409000 | 10.630704000 | 2.342024000  |
| 7 | -0.968547000 | 1.013357000  | -0.997043000 |
| 6 | -1.841861000 | 1.154658000  | -2.080708000 |
| 6 | -1.582565000 | 0.345235000  | 0.064384000  |
| 6 | -3.121095000 | 0.524041000  | -1.671095000 |
| 8 | -1.572146000 | 1.694439000  | -3.135901000 |
| 6 | -2.967791000 | 0.042882000  | -0.375118000 |
| 8 | -1.057306000 | 0.073950000  | 1.126862000  |
| 6 | -4.297877000 | 0.354073000  | -2.375199000 |
| 6 | -3.987497000 | -0.627844000 | 0.273250000  |
| 1 | -4.405331000 | 0.728123000  | -3.392352000 |
| 6 | -5.336412000 | -0.325340000 | -1.730011000 |
| 1 | -3.860112000 | -1.007054000 | 1.285775000  |
| 6 | -5.183703000 | -0.808156000 | -0.429484000 |
| 1 | -6.279542000 | -0.484109000 | -2.249739000 |
| 1 | -6.009741000 | -1.334968000 | 0.044611000  |

|                                              |  |  |              |
|----------------------------------------------|--|--|--------------|
| Zero-point correction=                       |  |  | 0.710923     |
| (Hartree/Particle)                           |  |  |              |
| Thermal correction to Energy=                |  |  | 0.753629     |
| Thermal correction to Enthalpy=              |  |  | 0.754574     |
| Thermal correction to Gibbs Free Energy=     |  |  | 0.634515     |
| Sum of electronic and zero-point Energies=   |  |  | -2191.638179 |
| Sum of electronic and thermal Energies=      |  |  | -2191.595473 |
| Sum of electronic and thermal Enthalpies=    |  |  | -2191.594529 |
| Sum of electronic and thermal Free Energies= |  |  | -2191.714587 |

E(M06/6-311+G(2d,p))= -2192.86008044

**Intermediate t-Xb**

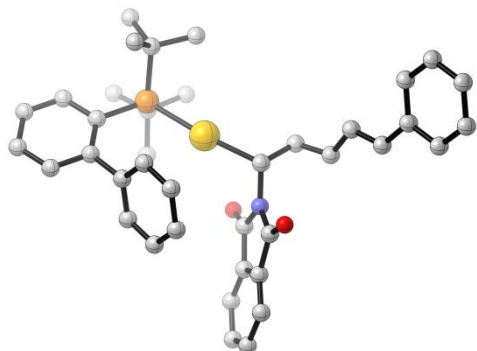

|    |              |              |              |
|----|--------------|--------------|--------------|
| 79 | 1.304474000  | -0.333189000 | 0.064077000  |
| 15 | 3.012717000  | -1.993612000 | 0.247495000  |
| 6  | 2.605381000  | -2.963748000 | 1.826246000  |
| 6  | 4.691305000  | -1.102454000 | 0.310619000  |
| 6  | -0.166115000 | 1.234662000  | 0.123990000  |
| 1  | 0.063742000  | 1.910944000  | -0.709470000 |
| 6  | -0.058338000 | 1.999638000  | 1.495361000  |
| 1  | -0.547831000 | 1.402914000  | 2.271934000  |
| 1  | 0.992710000  | 2.166125000  | 1.756097000  |
| 6  | 3.110746000  | -3.281954000 | -1.069945000 |
| 6  | 4.125246000  | -4.250076000 | -0.980928000 |
| 6  | 2.151829000  | -3.410892000 | -2.099604000 |
| 6  | 4.191800000  | -5.331370000 | -1.848734000 |
| 1  | 4.882025000  | -4.171156000 | -0.204108000 |
| 6  | 2.220473000  | -4.525071000 | -2.949607000 |
| 6  | 3.220002000  | -5.479412000 | -2.831206000 |
| 1  | 4.994227000  | -6.059577000 | -1.745992000 |
| 1  | 1.472531000  | -4.621024000 | -3.736299000 |
| 1  | 3.245742000  | -6.328393000 | -3.512120000 |
| 6  | 1.065761000  | -2.444821000 | -2.414829000 |
| 6  | -0.271428000 | -2.851596000 | -2.344518000 |
| 6  | 1.359452000  | -1.177842000 | -2.933867000 |
| 6  | -1.293716000 | -2.014029000 | -2.785016000 |
| 1  | -0.505250000 | -3.842533000 | -1.953261000 |
| 6  | 0.338008000  | -0.341890000 | -3.379502000 |
| 1  | 2.400473000  | -0.860842000 | -3.013908000 |
| 6  | -0.989250000 | -0.760568000 | -3.310975000 |
| 1  | -2.329830000 | -2.349667000 | -2.735306000 |
| 1  | 0.580697000  | 0.638788000  | -3.787880000 |
| 1  | -1.785935000 | -0.109382000 | -3.670332000 |
| 6  | 5.812681000  | -1.845390000 | 1.031498000  |
| 1  | 6.724709000  | -1.231220000 | 0.979421000  |
| 1  | 6.056215000  | -2.814034000 | 0.579404000  |
| 1  | 5.587468000  | -2.000420000 | 2.094424000  |
| 6  | 5.094700000  | -0.830272000 | -1.138775000 |
| 1  | 5.351321000  | -1.749163000 | -1.681901000 |
| 1  | 5.980922000  | -0.177769000 | -1.146722000 |
| 1  | 4.298191000  | -0.312700000 | -1.694783000 |
| 6  | 4.485797000  | 0.243171000  | 1.014775000  |
| 1  | 5.453417000  | 0.765191000  | 1.069239000  |
| 1  | 4.111218000  | 0.129805000  | 2.040608000  |
| 1  | 3.783752000  | 0.887540000  | 0.466188000  |
| 6  | 2.594225000  | -1.984694000 | 3.000479000  |
| 1  | 3.602292000  | -1.629835000 | 3.255622000  |
| 1  | 2.192644000  | -2.499271000 | 3.886658000  |
| 1  | 1.953527000  | -1.111474000 | 2.802888000  |
| 6  | 1.188519000  | -3.505284000 | 1.613164000  |
| 1  | 0.453215000  | -2.703327000 | 1.451375000  |
| 1  | 0.885596000  | -4.064423000 | 2.511684000  |
| 1  | 1.139494000  | -4.199433000 | 0.761433000  |
| 6  | 3.517542000  | -4.141685000 | 2.160220000  |
| 1  | 3.171898000  | -4.579111000 | 3.109268000  |
| 1  | 4.567815000  | -3.857590000 | 2.295757000  |
| 1  | 3.462910000  | -4.932850000 | 1.402752000  |
| 6  | -0.752924000 | 3.226955000  | 1.150997000  |

|   |              |              |              |
|---|--------------|--------------|--------------|
| 1 | -1.838180000 | 3.171938000  | 1.028839000  |
| 6 | -0.130914000 | 4.422840000  | 0.821910000  |
| 1 | 0.948552000  | 4.511155000  | 0.953468000  |
| 6 | -0.889133000 | 5.477368000  | 0.354455000  |
| 1 | -1.961069000 | 5.294441000  | 0.233485000  |
| 6 | -0.442432000 | 6.789574000  | 0.008896000  |
| 6 | -1.399691000 | 7.713548000  | -0.459351000 |
| 6 | 0.907233000  | 7.191741000  | 0.110758000  |
| 6 | -1.023289000 | 8.996874000  | -0.817144000 |
| 1 | -2.440668000 | 7.401025000  | -0.534873000 |
| 6 | 1.276060000  | 8.475225000  | -0.245764000 |
| 1 | 1.660185000  | 6.493319000  | 0.471149000  |
| 6 | 0.313966000  | 9.377215000  | -0.709656000 |
| 1 | -1.765459000 | 9.704182000  | -1.180634000 |
| 1 | 2.316283000  | 8.783560000  | -0.166830000 |
| 1 | 0.612017000  | 10.386218000 | -0.989048000 |
| 7 | -1.495165000 | 0.733162000  | -0.118749000 |
| 6 | -2.343240000 | 1.230250000  | -1.122168000 |
| 6 | -2.040144000 | -0.404859000 | 0.490758000  |
| 6 | -3.516683000 | 0.326289000  | -1.154676000 |
| 8 | -2.115789000 | 2.210008000  | -1.800712000 |
| 6 | -3.339837000 | -0.649125000 | -0.177269000 |
| 8 | -1.511750000 | -1.045012000 | 1.377233000  |
| 6 | -4.617710000 | 0.327347000  | -1.989730000 |
| 6 | -4.263138000 | -1.660186000 | 0.012142000  |
| 1 | -4.741813000 | 1.088748000  | -2.758046000 |
| 6 | -5.556380000 | -0.693385000 | -1.809971000 |
| 1 | -4.118128000 | -2.421054000 | 0.777055000  |
| 6 | -5.382353000 | -1.668404000 | -0.826024000 |
| 1 | -6.437266000 | -0.730780000 | -2.447908000 |
| 1 | -6.131779000 | -2.449401000 | -0.712217000 |

|                                              |              |
|----------------------------------------------|--------------|
| Zero-point correction=                       | 0.712649     |
| (Hartree/Particle)                           |              |
| Thermal correction to Energy=                | 0.755680     |
| Thermal correction to Enthalpy=              | 0.756624     |
| Thermal correction to Gibbs Free Energy=     | 0.635206     |
| Sum of electronic and zero-point Energies=   | -2191.643047 |
| Sum of electronic and thermal Energies=      | -2191.600016 |
| Sum of electronic and thermal Enthalpies=    | -2191.599072 |
| Sum of electronic and thermal Free Energies= | -2191.720490 |

E(M06/6-311+G(2d,p))= -2192.86619429

**Transition state TS<sub>t-IXb-c-IXb</sub>**

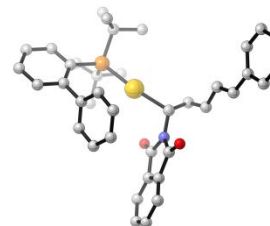

|    |              |              |              |
|----|--------------|--------------|--------------|
| 79 | 1.118493000  | -0.309653000 | 0.173263000  |
| 15 | 2.934071000  | -1.824703000 | 0.208107000  |
| 6  | 2.615104000  | -3.011635000 | 1.646180000  |
| 6  | 4.513150000  | -0.782895000 | 0.406810000  |
| 6  | -0.469996000 | 1.221031000  | 0.411849000  |
| 1  | -0.131789000 | 1.802355000  | -0.452788000 |
| 6  | -0.192730000 | 1.754553000  | 1.865636000  |
| 1  | -0.780845000 | 1.184595000  | 2.583824000  |
| 1  | 0.866689000  | 1.800100000  | 2.126214000  |
| 6  | 3.137692000  | -2.910184000 | -1.265199000 |
| 6  | 4.267490000  | -3.742994000 | -1.325593000 |
| 6  | 2.164942000  | -3.023818000 | -2.283030000 |
| 6  | 4.440138000  | -4.677838000 | -2.336822000 |
| 1  | 5.034097000  | -3.668780000 | -0.558084000 |
| 6  | 2.345056000  | -3.991954000 | -3.281338000 |
| 6  | 3.462270000  | -4.813727000 | -3.315175000 |
| 1  | 5.331821000  | -5.301717000 | -2.349902000 |
| 1  | 1.586281000  | -4.079241000 | -4.058686000 |
| 1  | 3.572498000  | -5.550941000 | -4.108489000 |
| 6  | 0.948705000  | -2.179501000 | -2.439042000 |

|   |              |              |              |
|---|--------------|--------------|--------------|
| 6 | -0.322266000 | -2.745136000 | -2.291605000 |
| 6 | 1.052145000  | -0.858123000 | -2.891921000 |
| 6 | -1.466390000 | -2.009497000 | -2.594383000 |
| 1 | -0.408406000 | -3.779589000 | -1.957042000 |
| 6 | -0.091034000 | -0.123959000 | -3.198648000 |
| 1 | 2.039572000  | -0.417114000 | -3.036282000 |
| 6 | -1.351787000 | -0.699909000 | -3.055138000 |
| 1 | -2.449713000 | -2.467731000 | -2.487722000 |
| 1 | 0.004465000  | 0.897953000  | -3.564840000 |
| 1 | -2.242459000 | -0.132196000 | -3.322368000 |
| 6 | 5.690075000  | -1.490194000 | 1.076283000  |
| 1 | 6.542897000  | -0.794805000 | 1.096506000  |
| 1 | 6.023810000  | -2.387095000 | 0.541528000  |
| 1 | 5.469637000  | -1.763795000 | 2.116372000  |
| 6 | 4.914006000  | -0.315312000 | -0.992108000 |
| 1 | 5.295458000  | -1.133766000 | -1.615116000 |
| 1 | 5.712535000  | 0.436024000  | -0.899514000 |
| 1 | 4.075599000  | 0.160017000  | -1.523087000 |
| 6 | 4.169482000  | 0.455240000  | 1.243919000  |
| 1 | 5.085601000  | 1.049568000  | 1.379201000  |
| 1 | 3.787987000  | 0.203666000  | 2.242355000  |
| 1 | 3.425318000  | 1.092561000  | 0.744019000  |
| 6 | 2.529320000  | -2.199831000 | 2.938215000  |
| 1 | 3.499868000  | -1.776210000 | 3.230246000  |
| 1 | 2.202865000  | -2.864779000 | 3.751923000  |
| 1 | 1.796173000  | -1.381319000 | 2.865556000  |
| 6 | 1.254895000  | -3.651551000 | 1.357790000  |
| 1 | 0.446601000  | -2.907704000 | 1.311461000  |
| 1 | 1.017759000  | -4.358008000 | 2.167466000  |
| 1 | 1.261668000  | -4.218365000 | 0.415365000  |
| 6 | 3.643575000  | -4.128658000 | 1.811795000  |
| 1 | 3.360527000  | -4.726011000 | 2.691595000  |
| 1 | 4.661075000  | -3.757663000 | 1.980652000  |
| 1 | 3.656225000  | -4.808420000 | 0.950614000  |
| 6 | -0.760581000 | 2.930577000  | 1.286956000  |
| 1 | -1.846376000 | 3.008873000  | 1.226610000  |
| 6 | 0.012470000  | 4.035876000  | 0.814299000  |
| 1 | 1.093448000  | 3.998208000  | 0.970816000  |
| 6 | -0.584112000 | 5.098661000  | 0.223258000  |
| 1 | -1.667693000 | 5.048601000  | 0.079267000  |
| 6 | 0.053771000  | 6.314249000  | -0.243977000 |
| 6 | -0.733485000 | 7.281129000  | -0.889010000 |
| 6 | 1.427105000  | 6.563515000  | -0.078413000 |
| 6 | -0.167916000 | 8.457517000  | -1.362976000 |
| 1 | -1.799871000 | 7.093554000  | -1.017074000 |
| 6 | 1.989460000  | 7.739037000  | -0.550628000 |
| 1 | 2.054373000  | 5.832434000  | 0.430002000  |
| 6 | 1.194782000  | 8.688883000  | -1.194865000 |
| 1 | -0.791013000 | 9.196764000  | -1.862980000 |
| 1 | 3.053965000  | 7.922252000  | -0.414854000 |
| 1 | 1.640339000  | 9.611195000  | -1.563776000 |
| 7 | -1.769828000 | 0.681917000  | 0.198835000  |
| 6 | -2.678978000 | 1.198785000  | -0.745421000 |
| 6 | -2.247352000 | -0.507298000 | 0.776252000  |
| 6 | -3.830618000 | 0.269465000  | -0.748121000 |
| 8 | -2.495863000 | 2.204739000  | -1.395010000 |
| 6 | -3.579853000 | -0.741303000 | 0.177192000  |
| 8 | -1.641645000 | -1.180929000 | 1.582883000  |
| 6 | -4.980993000 | 0.283421000  | -1.513986000 |
| 6 | -4.474550000 | -1.775295000 | 0.381325000  |
| 1 | -5.162732000 | 1.071430000  | -2.242675000 |
| 6 | -5.891739000 | -0.758890000 | -1.317053000 |
| 1 | -4.272285000 | -2.562874000 | 1.104861000  |
| 6 | -5.643949000 | -1.767799000 | -0.384442000 |
| 1 | -6.809591000 | -0.785890000 | -1.900842000 |
| 1 | -6.375137000 | -2.563337000 | -0.255499000 |

Zero-point correction= 0.712012  
(Hartree/Particle)  
Thermal correction to Energy= 0.754433  
Thermal correction to Enthalpy= 0.755377  
Thermal correction to Gibbs Free Energy= 0.636580  
Sum of electronic and zero-point Energies= -2191.640669  
Sum of electronic and thermal Energies= -2191.598249  
Sum of electronic and thermal Enthalpies= -2191.597305  
Sum of electronic and thermal Free Energies= -2191.716101

E(M06/6-311+G(2d,p))= -2192.86366014

### Intermediate *t*-IXb

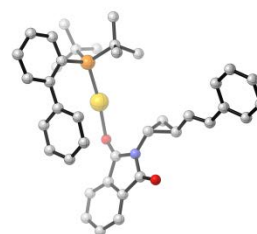

|    |              |              |              |
|----|--------------|--------------|--------------|
| 79 | 0.455895000  | -1.368831000 | 0.622003000  |
| 15 | 2.705194000  | -1.871698000 | 0.370545000  |
| 6  | 3.079501000  | -3.160807000 | 1.706955000  |
| 6  | 3.732783000  | -0.280344000 | 0.490218000  |
| 6  | -0.927588000 | 1.568240000  | 0.397662000  |
| 1  | -0.073895000 | 1.315878000  | -0.238800000 |
| 6  | -0.679180000 | 1.838764000  | 1.849089000  |
| 1  | -1.458910000 | 1.531603000  | 2.544726000  |
| 1  | 0.339336000  | 1.732642000  | 2.220617000  |
| 6  | 3.096098000  | -2.678813000 | -1.234607000 |
| 6  | 4.424179000  | -3.085763000 | -1.449091000 |
| 6  | 2.131508000  | -2.984753000 | -2.219883000 |
| 6  | 4.798672000  | -3.805623000 | -2.574986000 |
| 1  | 5.192575000  | -2.845911000 | -0.718744000 |
| 6  | 2.526118000  | -3.734920000 | -3.336860000 |
| 6  | 3.837714000  | -4.148657000 | -3.518409000 |
| 1  | 5.837741000  | -4.101165000 | -2.706269000 |
| 1  | 1.774747000  | -3.971992000 | -4.089542000 |
| 1  | 4.108623000  | -4.725118000 | -4.401075000 |
| 6  | 0.709734000  | -2.540726000 | -2.238925000 |
| 6  | -0.324716000 | -3.474895000 | -2.112847000 |
| 6  | 0.389014000  | -1.216093000 | -2.563480000 |
| 6  | -1.650290000 | -3.093737000 | -2.307006000 |
| 1  | -0.080421000 | -4.511957000 | -1.878852000 |
| 6  | -0.936320000 | -0.837557000 | -2.767640000 |
| 1  | 1.192187000  | -0.488664000 | -2.690375000 |
| 6  | -1.958201000 | -1.777514000 | -2.645505000 |
| 1  | -2.444232000 | -3.833479000 | -2.211303000 |
| 1  | -1.168282000 | 0.191868000  | -3.042282000 |
| 1  | -2.992970000 | -1.490283000 | -2.832498000 |
| 6  | 5.193622000  | -0.492635000 | 0.878256000  |
| 1  | 5.687817000  | 0.490093000  | 0.896692000  |
| 1  | 5.746356000  | -1.115392000 | 0.165112000  |
| 1  | 5.293938000  | -0.927690000 | 1.880578000  |
| 6  | 3.647156000  | 0.403401000  | -0.875072000 |
| 1  | 4.142174000  | -0.170611000 | -1.668877000 |
| 1  | 4.146660000  | 1.381382000  | -0.807072000 |
| 1  | 2.604959000  | 0.587573000  | -1.177980000 |
| 6  | 3.086791000  | 0.643093000  | 1.524027000  |
| 1  | 3.655926000  | 1.584394000  | 1.556968000  |
| 1  | 3.086697000  | 0.220651000  | 2.536379000  |
| 1  | 2.050340000  | 0.882412000  | 1.250861000  |
| 6  | 2.868914000  | -2.506938000 | 3.071861000  |
| 1  | 3.653645000  | -1.774198000 | 3.302868000  |
| 1  | 2.910781000  | -3.288212000 | 3.845128000  |
| 1  | 1.890149000  | -2.011111000 | 3.152299000  |
| 6  | 2.052646000  | -4.279352000 | 1.509714000  |
| 1  | 1.018865000  | -3.921091000 | 1.620208000  |
| 1  | 2.224791000  | -5.053435000 | 2.272395000  |
| 1  | 2.148417000  | -4.758108000 | 0.524444000  |
| 6  | 4.472944000  | -3.784655000 | 1.659239000  |
| 1  | 4.573851000  | -4.445429000 | 2.532890000  |
| 1  | 5.282503000  | -3.047441000 | 1.711504000  |
| 1  | 4.617768000  | -4.405438000 | 0.767439000  |
| 6  | -0.992133000 | 2.982785000  | 0.926672000  |
| 1  | -1.990716000 | 3.411078000  | 1.011571000  |
| 6  | 0.069245000  | 3.907355000  | 0.502900000  |
| 1  | 1.069395000  | 3.470096000  | 0.411461000  |
| 6  | -0.136827000 | 5.200818000  | 0.221166000  |

|   |              |              |              |
|---|--------------|--------------|--------------|
| 1 | -1.152116000 | 5.594553000  | 0.328826000  |
| 6 | 0.860750000  | 6.169741000  | -0.234867000 |
| 6 | 0.459379000  | 7.492973000  | -0.465400000 |
| 6 | 2.205069000  | 5.837767000  | -0.465517000 |
| 6 | 1.362339000  | 8.452254000  | -0.911016000 |
| 1 | -0.582298000 | 7.765796000  | -0.291344000 |
| 6 | 3.106881000  | 6.794642000  | -0.910454000 |
| 1 | 2.550942000  | 4.817192000  | -0.299680000 |
| 6 | 2.691307000  | 8.106937000  | -1.136686000 |
| 1 | 1.025214000  | 9.473364000  | -1.083880000 |
| 1 | 4.145088000  | 6.515551000  | -1.086035000 |
| 1 | 3.401384000  | 8.853137000  | -1.489552000 |
| 7 | -2.149788000 | 0.919855000  | 0.032663000  |
| 6 | -3.174388000 | 1.501869000  | -0.770584000 |
| 6 | -2.465323000 | -0.377241000 | 0.358605000  |
| 6 | -4.239692000 | 0.479279000  | -0.850874000 |
| 8 | -3.116647000 | 2.597730000  | -1.268355000 |
| 6 | -3.818984000 | -0.647499000 | -0.147095000 |
| 8 | -1.729012000 | -1.177380000 | 0.949410000  |
| 6 | -5.445506000 | 0.503882000  | -1.523856000 |
| 6 | -4.583596000 | -1.797941000 | -0.086454000 |
| 1 | -5.761116000 | 1.382326000  | -2.083394000 |
| 6 | -6.231916000 | -0.651224000 | -1.463075000 |
| 1 | -4.241316000 | -2.680390000 | 0.451374000  |
| 6 | -5.810371000 | -1.778816000 | -0.755897000 |
| 1 | -7.188758000 | -0.674908000 | -1.980346000 |
| 1 | -6.446247000 | -2.661331000 | -0.734007000 |

Zero-point correction= 0.712733  
(Hartree/Particle)  
Thermal correction to Energy= 0.755641  
Thermal correction to Enthalpy= 0.756585  
Thermal correction to Gibbs Free Energy= 0.636653  
Sum of electronic and zero-point Energies= -2191.666788  
Sum of electronic and thermal Energies= -2191.623880  
Sum of electronic and thermal Enthalpies= -2191.622936  
Sum of electronic and thermal Free Energies= -2191.742868

E(M06/6-311+G(2d,p))= -2192.89079352

#### Product *cis*-6a

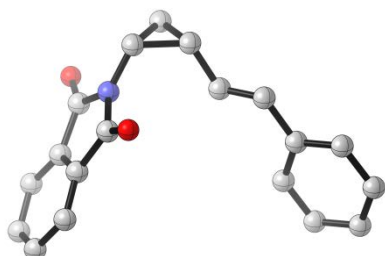

|   |              |              |              |
|---|--------------|--------------|--------------|
| 6 | -0.999130000 | -2.535189000 | -0.450601000 |
| 1 | -1.416973000 | -3.145954000 | -1.250866000 |
| 6 | -0.455969000 | -3.229138000 | 0.747606000  |
| 1 | -0.545204000 | -2.716232000 | 1.703289000  |
| 1 | -0.562317000 | -4.310389000 | 0.797049000  |
| 6 | 0.503969000  | -2.638893000 | -0.252372000 |
| 1 | 0.997972000  | -3.334475000 | -0.931478000 |
| 6 | 1.294718000  | -1.459411000 | 0.120758000  |
| 1 | 0.805620000  | -0.744397000 | 0.789251000  |
| 6 | 2.549582000  | -1.245050000 | -0.300336000 |
| 1 | 3.000783000  | -1.985943000 | -0.967691000 |
| 6 | 3.406362000  | -0.105843000 | 0.030223000  |
| 6 | 4.688585000  | -0.038741000 | -0.533346000 |
| 6 | 3.007779000  | 0.935225000  | 0.883894000  |
| 6 | 5.541565000  | 1.024970000  | -0.260267000 |
| 1 | 5.013979000  | -0.839512000 | -1.198800000 |
| 6 | 3.858587000  | 1.997186000  | 1.157554000  |
| 1 | 2.018820000  | 0.912681000  | 1.340993000  |
| 6 | 5.130426000  | 2.049971000  | 0.586761000  |
| 1 | 6.532032000  | 1.053114000  | -0.712605000 |
| 1 | 3.527102000  | 2.793277000  | 1.823241000  |
| 1 | 5.794582000  | 2.885003000  | 0.804188000  |

|   |              |              |              |
|---|--------------|--------------|--------------|
| 7 | -1.637425000 | -1.266305000 | -0.289919000 |
| 6 | -1.475186000 | -0.217127000 | -1.211597000 |
| 6 | -2.591123000 | -0.950645000 | 0.692340000  |
| 6 | -2.337667000 | 0.885974000  | -0.725579000 |
| 8 | -0.771930000 | -0.258676000 | -2.195919000 |
| 6 | -3.001105000 | 0.448247000  | 0.415900000  |
| 8 | -2.984116000 | -1.690514000 | 1.566744000  |
| 6 | -2.532246000 | 2.156723000  | -1.235133000 |
| 6 | -3.887302000 | 1.261693000  | 1.097320000  |
| 1 | -2.009441000 | 2.490427000  | -2.129675000 |
| 6 | -3.423283000 | 2.989002000  | -0.552499000 |
| 1 | -4.403966000 | 0.909103000  | 1.988273000  |
| 6 | -4.088920000 | 2.549409000  | 0.593697000  |
| 1 | -3.603253000 | 3.997846000  | -0.919041000 |
| 1 | -4.777239000 | 3.222932000  | 1.100774000  |

Zero-point correction= 0.292509  
(Hartree/Particle)  
Thermal correction to Energy= 0.310261  
Thermal correction to Enthalpy= 0.311206  
Thermal correction to Gibbs Free Energy= 0.243913  
Sum of electronic and zero-point Energies= -937.302816  
Sum of electronic and thermal Energies= -937.285064  
Sum of electronic and thermal Enthalpies= -937.284120  
Sum of electronic and thermal Free Energies= -  
937.351413

E(M06/6-311+G(2d,p))= -937.863691691

#### Product *trans*-6a

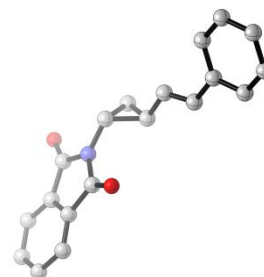

|   |              |              |              |
|---|--------------|--------------|--------------|
| 6 | 0.463289000  | 1.353654000  | -0.275694000 |
| 6 | -0.603494000 | 0.989265000  | 0.733493000  |
| 6 | 0.090383000  | 2.323404000  | 0.791703000  |
| 1 | 0.130114000  | 1.557641000  | -1.294173000 |
| 1 | 0.806742000  | 2.482456000  | 1.595109000  |
| 1 | -0.469244000 | 3.206662000  | 0.488012000  |
| 7 | 1.719481000  | 0.680461000  | -0.178999000 |
| 6 | 2.963070000  | 1.332327000  | -0.138024000 |
| 6 | 1.863473000  | -0.715869000 | -0.227284000 |
| 6 | 3.980547000  | 0.253472000  | -0.097580000 |
| 8 | 3.127330000  | 2.531980000  | -0.141483000 |
| 6 | 3.322033000  | -0.971374000 | -0.150001000 |
| 8 | 0.956628000  | -1.513273000 | -0.316021000 |
| 6 | 5.359384000  | 0.331718000  | -0.029032000 |
| 6 | 4.013498000  | -2.168368000 | -0.137224000 |
| 1 | 5.867104000  | 1.293900000  | 0.010898000  |
| 6 | 6.068658000  | -0.872189000 | -0.014070000 |
| 1 | 3.489969000  | -3.121818000 | -0.181401000 |
| 6 | 5.407161000  | -2.101091000 | -0.066488000 |
| 1 | 7.155546000  | -0.853951000 | 0.038851000  |
| 1 | 5.989751000  | -3.020341000 | -0.054475000 |
| 6 | -1.993055000 | 0.887322000  | 0.271326000  |
| 1 | -2.306670000 | 1.644037000  | -0.455024000 |
| 6 | -2.847222000 | -0.062385000 | 0.678497000  |
| 1 | -2.486573000 | -0.801029000 | 1.401172000  |
| 6 | -4.235895000 | -0.237705000 | 0.251939000  |
| 6 | -4.968866000 | -1.318704000 | 0.761408000  |
| 6 | -4.876174000 | 0.625236000  | -0.651836000 |
| 6 | -6.289503000 | -1.536033000 | 0.383335000  |
| 1 | -4.485510000 | -1.997773000 | 1.465037000  |
| 6 | -6.194367000 | 0.409195000  | -1.029641000 |
| 1 | -4.335731000 | 1.476382000  | -1.065247000 |
| 6 | -6.909250000 | -0.672282000 | -0.515119000 |

|   |              |              |              |
|---|--------------|--------------|--------------|
| 1 | -6.835966000 | -2.384230000 | 0.793600000  |
| 1 | -6.670042000 | 1.091777000  | -1.732778000 |
| 1 | -7.943239000 | -0.838563000 | -0.813363000 |
| 1 | -0.296298000 | 0.254422000  | 1.478560000  |

Zero-point correction= 0.292519  
(Hartree/Particle)

|                                              |             |
|----------------------------------------------|-------------|
| Thermal correction to Energy=                | 0.310294    |
| Thermal correction to Enthalpy=              | 0.311238    |
| Thermal correction to Gibbs Free Energy=     | 0.244902    |
| Sum of electronic and zero-point Energies=   | -937.303110 |
| Sum of electronic and thermal Energies=      | -937.285334 |
| Sum of electronic and thermal Enthalpies=    | -937.284390 |
| Sum of electronic and thermal Free Energies= | -937.350726 |

E(M06/6-311+G(2d,p))= -937.864197858

## Calculated free energy profile for the formation and isomerization of 6g

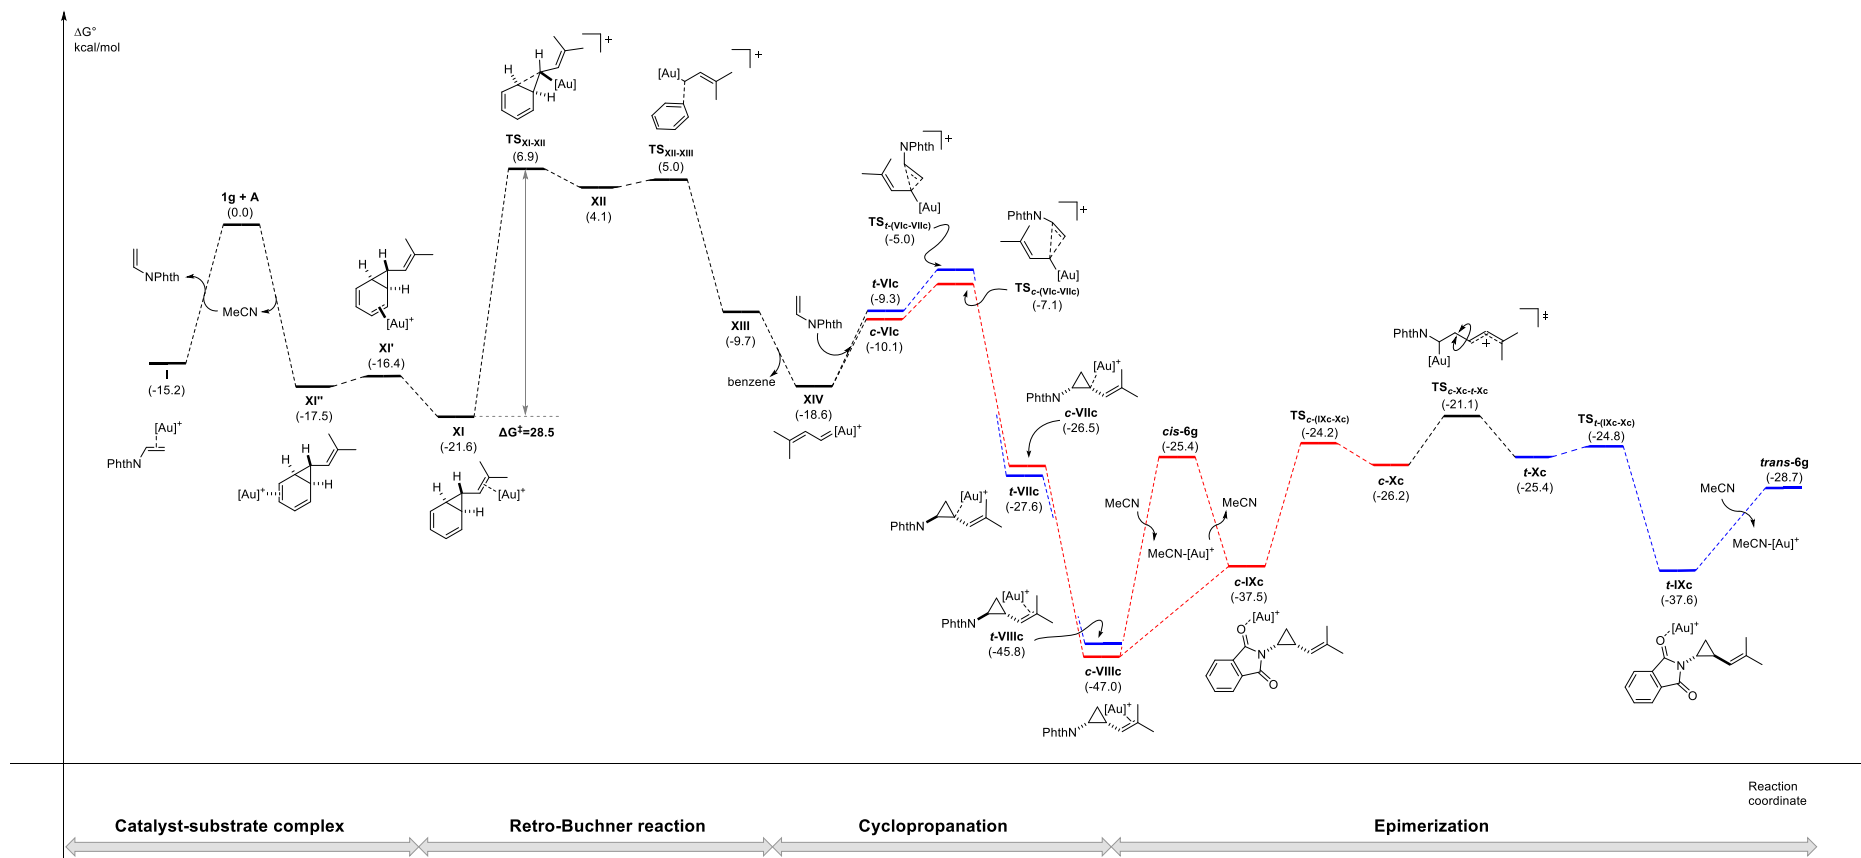

Computational details:  
 SMD(CH<sub>2</sub>Cl<sub>2</sub>)-M06/6-311+G(2d,p), SDD(Au,  $\approx$ 1.05)/SMD(CH<sub>2</sub>Cl<sub>2</sub>)-M06/6-31G(d), SDD(Au)  
 Gibbs free energies given in kcal/mol at the standard state (298.15 K, 1 atm)  
 [Au] = Au-JohnPhos



**Cartesian coordinates (in Å) and energies (in h) for reactants, intermediates and transition states involved in the formation and isomerization of 6g**

**Reactant 1g**

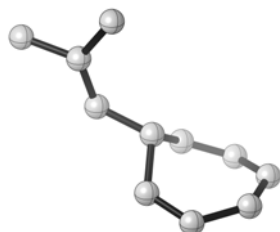

|   |              |              |              |    |              |              |              |
|---|--------------|--------------|--------------|----|--------------|--------------|--------------|
| 6 | -0.071919000 | 0.000236000  | -0.189094000 | 1  | 2.091290000  | 1.557144000  | -1.077211000 |
| 1 | -0.145850000 | -0.000062000 | 0.911715000  | 1  | 1.507707000  | 2.403892000  | 1.161306000  |
| 6 | -0.831144000 | -1.193944000 | -0.704932000 | 1  | 2.006033000  | 1.068686000  | 3.225504000  |
| 1 | -0.349042000 | -1.820716000 | -1.458480000 | 1  | 3.233945000  | -1.051717000 | 3.079767000  |
| 6 | -2.056239000 | -1.515544000 | -0.238503000 | 79 | 0.124725000  | 0.237121000  | 0.200972000  |
| 1 | -2.501411000 | -2.461884000 | -0.553249000 | 15 | -1.808357000 | -1.095508000 | -0.080208000 |
| 6 | -2.858210000 | -0.682403000 | 0.619797000  | 6  | -1.568006000 | -2.096654000 | -1.665198000 |
| 1 | -3.629505000 | -1.182662000 | 1.208728000  | 6  | -1.989370000 | -2.162470000 | 1.483352000  |
| 6 | -2.858377000 | 0.681777000  | 0.620050000  | 6  | -3.366569000 | -0.139470000 | -0.277941000 |
| 1 | -3.629780000 | 1.181631000  | 1.209189000  | 6  | -0.379824000 | -3.037301000 | -1.473847000 |
| 6 | -2.056581000 | 1.515513000  | -0.237841000 | 6  | -1.234247000 | -1.082890000 | -2.761555000 |
| 1 | -2.502010000 | 2.461896000  | -0.552114000 | 6  | -2.791955000 | -2.896706000 | -2.106099000 |
| 6 | -0.831347000 | 1.194513000  | -0.704335000 | 6  | -2.788176000 | -3.451595000 | 1.306199000  |
| 1 | -0.349370000 | 1.821849000  | -1.457487000 | 6  | -2.648741000 | -1.280480000 | 2.544446000  |
| 6 | 1.357251000  | 0.000280000  | -0.637631000 | 6  | -0.585639000 | -2.530232000 | 1.977329000  |
| 1 | 1.482621000  | 0.000609000  | -1.727081000 | 6  | -4.577998000 | -0.850241000 | -0.309549000 |
| 6 | 2.465303000  | -0.000073000 | 0.114837000  | 6  | -3.413026000 | 1.270972000  | -0.314514000 |
| 6 | 2.494384000  | -0.000379000 | 1.612381000  | 1  | -0.592373000 | -3.836553000 | -0.751775000 |
| 1 | 3.041269000  | -0.880084000 | 1.984923000  | 1  | -0.151997000 | -3.516374000 | -2.437726000 |
| 1 | 3.041016000  | 0.879360000  | 1.985270000  | 1  | 0.523868000  | -2.502571000 | -1.144525000 |
| 1 | 1.502327000  | -0.000556000 | 2.076783000  | 1  | -0.312679000 | -0.523285000 | -2.539897000 |
| 6 | 3.823188000  | 0.000076000  | -0.520675000 | 1  | -1.083886000 | -1.620948000 | -3.709299000 |
| 1 | 4.406464000  | 0.879989000  | -0.207500000 | 1  | -2.049303000 | -0.361536000 | -2.918288000 |
| 1 | 4.406223000  | -0.880295000 | -0.208360000 | 1  | -2.520334000 | -3.470212000 | -3.004975000 |
| 1 | 3.769201000  | 0.000627000  | -1.616661000 | 1  | -3.132102000 | -3.614789000 | -1.350630000 |
|   |              |              |              | 1  | -3.633288000 | -2.247345000 | -2.378462000 |
|   |              |              |              | 1  | -2.829204000 | -3.964535000 | 2.278754000  |
|   |              |              |              | 1  | -3.825209000 | -3.279194000 | 0.994991000  |
|   |              |              |              | 1  | -2.315748000 | -4.140820000 | 0.594026000  |
|   |              |              |              | 1  | -3.704654000 | -1.076597000 | 2.327460000  |
|   |              |              |              | 1  | -2.599928000 | -1.800376000 | 3.512562000  |
|   |              |              |              | 1  | -2.128328000 | -0.317004000 | 2.661003000  |
|   |              |              |              | 1  | -0.687157000 | -3.153915000 | 2.878054000  |
|   |              |              |              | 1  | -0.007572000 | -3.103409000 | 1.240882000  |
|   |              |              |              | 1  | -0.003388000 | -1.638601000 | 2.251713000  |
|   |              |              |              | 6  | -5.806108000 | -0.206257000 | -0.365886000 |
|   |              |              |              | 1  | -4.568181000 | -1.936308000 | -0.276961000 |
|   |              |              |              | 6  | -4.663748000 | 1.902904000  | -0.359739000 |
|   |              |              |              | 6  | -2.244660000 | 2.196171000  | -0.317300000 |
|   |              |              |              | 6  | -5.849065000 | 1.182881000  | -0.385647000 |
|   |              |              |              | 1  | -6.723336000 | -0.791523000 | -0.386699000 |
|   |              |              |              | 1  | -4.691282000 | 2.991936000  | -0.383398000 |
|   |              |              |              | 6  | -1.522256000 | 2.441886000  | -1.490731000 |
|   |              |              |              | 6  | -1.962396000 | 2.957752000  | 0.822520000  |
|   |              |              |              | 1  | -6.802714000 | 1.706328000  | -0.423214000 |
|   |              |              |              | 6  | -0.533129000 | 3.422558000  | -1.520343000 |
|   |              |              |              | 1  | -1.757470000 | 1.875333000  | -2.392228000 |
|   |              |              |              | 6  | -0.969027000 | 3.933766000  | 0.794423000  |
|   |              |              |              | 1  | -2.540768000 | 2.788716000  | 1.731933000  |
|   |              |              |              | 6  | -0.253683000 | 4.170418000  | -0.377930000 |
|   |              |              |              | 1  | 0.008786000  | 3.613901000  | -2.445774000 |
|   |              |              |              | 1  | -0.764217000 | 4.522471000  | 1.687546000  |
|   |              |              |              | 1  | 0.509973000  | 4.946317000  | -0.406055000 |
|   |              |              |              | 6  | 3.231084000  | -0.187792000 | -0.356085000 |
|   |              |              |              | 1  | 3.121066000  | -0.767703000 | -1.273379000 |
|   |              |              |              | 6  | 4.638477000  | -0.097463000 | 0.184775000  |
|   |              |              |              | 1  | 4.884270000  | 0.843768000  | 0.679345000  |
|   |              |              |              | 6  | 3.623426000  | -0.945079000 | 0.921773000  |
|   |              |              |              | 1  | 3.768836000  | -2.022210000 | 0.836211000  |
|   |              |              |              | 6  | 6.975405000  | -0.370319000 | -0.727583000 |
|   |              |              |              | 6  | 5.708018000  | -0.778447000 | -0.564035000 |
|   |              |              |              | 1  | 5.406527000  | -1.722212000 | -1.031938000 |
|   |              |              |              | 6  | 7.944170000  | -1.184089000 | -1.529746000 |
|   |              |              |              | 1  | 8.820217000  | -1.465395000 | -0.924981000 |
|   |              |              |              | 1  | 7.491789000  | -2.103483000 | -1.922080000 |
|   |              |              |              | 1  | 8.335131000  | -0.605681000 | -2.381238000 |
|   |              |              |              | 6  | 7.551557000  | 0.888892000  | -0.159160000 |
|   |              |              |              | 1  | 6.845581000  | 1.469312000  | 0.444773000  |
|   |              |              |              | 1  | 8.424416000  | 0.661025000  | 0.471521000  |

Zero-point correction= 0.216277  
 (Hartree/Particle)  
 Thermal correction to Energy= 0.227338  
 Thermal correction to Enthalpy= 0.228282  
 Thermal correction to Gibbs Free Energy= 0.179136  
 Sum of electronic and zero-point Energies= -426.968784  
 Sum of electronic and thermal Energies= -426.957723  
 Sum of electronic and thermal Enthalpies= -426.956778  
 Sum of electronic and thermal Free Energies= -427.005925

E(M06/6-311+G(2d,p))= -427.315116865

**Intermediate XI''**

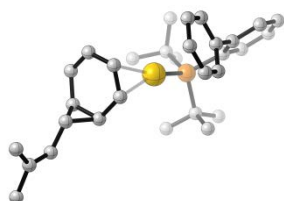

|   |             |              |              |   |             |              |              |
|---|-------------|--------------|--------------|---|-------------|--------------|--------------|
| 6 | 2.333874000 | 0.965282000  | -0.191964000 | 1 | 2.091290000 | 1.557144000  | -1.077211000 |
| 6 | 1.996615000 | 1.432855000  | 1.062891000  | 1 | 1.507707000 | 2.403892000  | 1.161306000  |
| 6 | 2.374353000 | 0.703278000  | 2.268876000  | 1 | 2.006033000 | 1.068686000  | 3.225504000  |
| 6 | 3.070155000 | -0.448221000 | 2.187343000  | 1 | 3.233945000 | -1.051717000 | 3.079767000  |



|                                                           |             |             |              |
|-----------------------------------------------------------|-------------|-------------|--------------|
| 1                                                         | 7.920676000 | 1.542051000 | -0.964732000 |
| Zero-point correction= 0.637000                           |             |             |              |
| (Hartree/Particle)                                        |             |             |              |
| Thermal correction to Energy= 0.673030                    |             |             |              |
| Thermal correction to Enthalpy= 0.673974                  |             |             |              |
| Thermal correction to Gibbs Free Energy= 0.568698         |             |             |              |
| Sum of electronic and zero-point Energies= -1681.345878   |             |             |              |
| Sum of electronic and thermal Energies= -1681.309848      |             |             |              |
| Sum of electronic and thermal Enthalpies= -1681.308904    |             |             |              |
| Sum of electronic and thermal Free Energies= -1681.414181 |             |             |              |

E(M06/6-311+G(2d,p))= -1682.35502229

**Intermediate XI'**

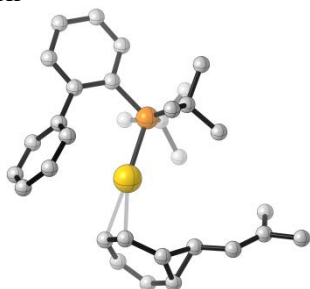

|    |              |              |              |
|----|--------------|--------------|--------------|
| 6  | -1.912779000 | -2.338362000 | -0.568897000 |
| 6  | -3.667058000 | -0.455598000 | -0.077057000 |
| 6  | -1.422604000 | -2.674263000 | 0.679770000  |
| 6  | -3.238812000 | -1.732794000 | -0.742323000 |
| 6  | -2.260518000 | -2.564468000 | 1.862525000  |
| 6  | -4.165013000 | -1.758280000 | 0.505669000  |
| 6  | -3.568369000 | -2.248534000 | 1.745918000  |
| 1  | -1.431263000 | -2.754626000 | -1.455096000 |
| 1  | -0.521737000 | -3.290366000 | 0.744148000  |
| 1  | -3.715750000 | -1.921717000 | -1.704316000 |
| 1  | -1.855301000 | -2.901896000 | 2.814297000  |
| 1  | -5.221320000 | -1.972257000 | 0.340638000  |
| 1  | -4.232852000 | -2.379021000 | 2.599654000  |
| 1  | -2.896343000 | 0.039765000  | 0.520037000  |
| 6  | -4.884396000 | 1.698005000  | -0.589640000 |
| 79 | -0.242995000 | -0.738913000 | 0.073623000  |
| 15 | 1.037092000  | 1.257622000  | 0.115495000  |
| 6  | 0.411723000  | 2.342876000  | -1.302131000 |
| 6  | 0.806789000  | 2.002804000  | 1.850999000  |
| 6  | 2.849697000  | 1.044249000  | -0.121508000 |
| 6  | -1.052556000 | 2.682285000  | -1.033222000 |
| 6  | 0.505280000  | 1.483003000  | -2.563512000 |
| 6  | 1.193690000  | 3.633408000  | -1.540889000 |
| 6  | 1.116589000  | 3.492514000  | 1.967509000  |
| 6  | 1.717566000  | 1.204711000  | 2.785660000  |
| 6  | -0.643384000 | 1.785389000  | 2.293326000  |
| 6  | 3.654487000  | 2.192049000  | -0.030331000 |
| 6  | 3.482489000  | -0.208931000 | -0.281259000 |
| 1  | -1.660401000 | 1.784733000  | -0.840054000 |
| 1  | -1.163547000 | 3.373779000  | -0.187573000 |
| 1  | -1.470767000 | 3.178552000  | -1.922185000 |
| 1  | -0.105778000 | 0.570877000  | -2.489322000 |
| 1  | 0.133877000  | 2.067897000  | -3.418262000 |
| 1  | 1.541173000  | 1.191902000  | -2.788475000 |
| 1  | 0.692868000  | 4.188258000  | -2.348245000 |
| 1  | 1.222478000  | 4.289719000  | -0.662026000 |
| 1  | 2.221617000  | 3.439939000  | -1.871090000 |
| 1  | 0.931193000  | 3.802022000  | 3.007195000  |
| 1  | 2.162623000  | 3.732513000  | 1.746193000  |
| 1  | 0.467990000  | 4.102286000  | 1.325060000  |
| 1  | 2.782046000  | 3.198227000  | 2.601930000  |
| 1  | 1.497880000  | 1.496630000  | 3.823250000  |
| 1  | 1.543182000  | 0.120321000  | 2.706840000  |
| 1  | -0.753898000 | 2.173308000  | 3.316964000  |
| 1  | -1.361970000 | 2.321966000  | 1.661404000  |
| 1  | -0.919236000 | 0.720689000  | 2.309575000  |
| 6  | 5.039995000  | 2.125759000  | -0.077604000 |
| 1  | 3.192613000  | 3.168126000  | 0.088382000  |

|   |              |              |              |
|---|--------------|--------------|--------------|
| 6 | 4.883621000  | -0.256562000 | -0.304863000 |
| 6 | 2.799750000  | -1.519528000 | -0.455666000 |
| 6 | 5.660239000  | 0.888725000  | -0.205445000 |
| 1 | 5.627807000  | 3.038874000  | -0.007102000 |
| 1 | 5.363742000  | -1.227704000 | -0.424321000 |
| 6 | 2.137119000  | -1.835761000 | -1.648202000 |
| 6 | 2.931385000  | -2.509040000 | 0.524775000  |
| 1 | 6.745650000  | 0.813482000  | -0.234476000 |
| 6 | 1.614646000  | -3.110950000 | -1.851405000 |
| 1 | 2.054125000  | -1.081212000 | -2.430809000 |
| 6 | 2.396216000  | -3.779831000 | 0.327510000  |
| 1 | 3.468409000  | -2.277582000 | 1.445549000  |
| 6 | 1.738280000  | -4.084995000 | -0.862113000 |
| 1 | 1.116136000  | -3.345320000 | -2.791373000 |
| 1 | 2.509608000  | -4.539331000 | 1.099806000  |
| 1 | 1.333846000  | -5.083212000 | -1.023210000 |
| 6 | -4.616712000 | 0.402431000  | -0.813019000 |
| 1 | -5.156136000 | -0.101583000 | -1.622108000 |
| 6 | -5.861059000 | 2.438417000  | -1.450512000 |
| 1 | -6.304500000 | 1.796646000  | -2.221978000 |
| 1 | -6.676805000 | 2.864982000  | -0.847197000 |
| 1 | -5.375040000 | 3.289094000  | -1.953498000 |
| 6 | -4.273740000 | 2.518867000  | 0.502739000  |
| 1 | -3.740625000 | 3.389191000  | 0.088760000  |
| 1 | -5.061190000 | 2.928278000  | 1.154270000  |
| 1 | -3.579540000 | 1.957983000  | 1.139275000  |

|                                              |              |
|----------------------------------------------|--------------|
| Zero-point correction=                       | 0.638873     |
| (Hartree/Particle)                           |              |
| Thermal correction to Energy=                | 0.674142     |
| Thermal correction to Enthalpy=              | 0.675086     |
| Thermal correction to Gibbs Free Energy=     | 0.572980     |
| Sum of electronic and zero-point Energies=   | -1681.346266 |
| Sum of electronic and thermal Energies=      | -1681.310997 |
| Sum of electronic and thermal Enthalpies=    | -1681.310053 |
| Sum of electronic and thermal Free Energies= | -1681.412158 |

E(M06/6-311+G(2d,p))= -1682.35752425

**Intermediate XI**

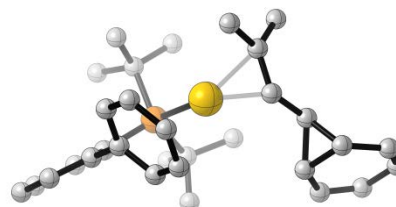

|    |              |              |              |
|----|--------------|--------------|--------------|
| 6  | -3.443020000 | -1.616843000 | -2.028669000 |
| 6  | -3.413809000 | 0.025750000  | -0.052736000 |
| 6  | -4.575114000 | -2.321889000 | -1.824391000 |
| 6  | -3.294218000 | -0.244388000 | -1.535496000 |
| 6  | -5.764772000 | -1.693023000 | -1.284636000 |
| 6  | -4.557825000 | 0.424269000  | -0.963081000 |
| 6  | -5.781337000 | -0.381868000 | -0.966831000 |
| 1  | -2.614754000 | -2.048675000 | -2.591453000 |
| 1  | -4.645854000 | -3.351093000 | -2.174080000 |
| 1  | -2.581570000 | 0.396018000  | -2.060181000 |
| 1  | -6.686315000 | -2.272595000 | -1.248741000 |
| 1  | -4.666592000 | 1.498883000  | -1.114412000 |
| 1  | -6.718483000 | 0.118921000  | -0.725830000 |
| 1  | -3.597410000 | -0.852046000 | 0.568669000  |
| 6  | -2.211184000 | 1.222826000  | 1.853004000  |
| 79 | -0.416787000 | 0.294044000  | 0.576297000  |
| 15 | 1.513799000  | -1.032874000 | 0.233872000  |
| 6  | 2.267141000  | -1.363583000 | 1.939417000  |
| 6  | 0.914854000  | -2.590083000 | -0.672905000 |
| 6  | 2.857534000  | -0.272332000 | -0.765346000 |
| 6  | 1.285564000  | -2.199525000 | 2.757697000  |
| 6  | 2.432168000  | 0.008538000  | 2.595732000  |
| 6  | 3.626172000  | -2.060675000 | 1.919123000  |

|   |              |              |              |
|---|--------------|--------------|--------------|
| 6 | 1.851940000  | -3.793387000 | -0.601997000 |
| 6 | 0.707295000  | -2.173075000 | -2.129832000 |
| 6 | -0.439150000 | -3.014543000 | -0.093041000 |
| 6 | 3.984022000  | -1.057006000 | -1.063534000 |
| 6 | 2.848966000  | 1.075978000  | -1.183619000 |
| 1 | 1.227677000  | -3.234107000 | 2.396544000  |
| 1 | 1.637154000  | -2.233183000 | 3.799556000  |
| 1 | 0.271531000  | -1.773291000 | 2.763847000  |
| 1 | 1.464578000  | 0.516786000  | 2.732640000  |
| 1 | 2.889341000  | -0.123850000 | 3.587799000  |
| 1 | 3.091458000  | 0.669337000  | 2.014278000  |
| 1 | 3.921277000  | -2.265258000 | 2.959089000  |
| 1 | 3.606319000  | -3.021446000 | 1.389497000  |
| 1 | 4.408337000  | -1.431532000 | 1.477125000  |
| 1 | 1.380772000  | -4.627842000 | -1.142917000 |
| 1 | 2.822967000  | -3.615604000 | -1.078534000 |
| 1 | 2.017091000  | -4.127154000 | 0.430848000  |
| 1 | 1.651233000  | -1.931581000 | -2.636033000 |
| 1 | 0.239132000  | -3.007098000 | -2.673686000 |
| 1 | 0.038912000  | -1.301876000 | -2.214926000 |
| 1 | -0.822523000 | -3.854235000 | -0.692204000 |
| 1 | -0.367160000 | -3.358445000 | 0.946291000  |
| 1 | -1.185603000 | -2.207361000 | -0.134463000 |
| 6 | 5.082855000  | -0.540032000 | -1.735309000 |
| 1 | 4.015959000  | -2.097439000 | -0.752971000 |
| 6 | 3.978677000  | 1.586587000  | -1.838115000 |
| 6 | 1.726684000  | 2.041454000  | -1.019460000 |
| 6 | 5.085303000  | 0.797049000  | -2.114797000 |
| 1 | 5.935989000  | -1.180047000 | -1.951680000 |
| 1 | 3.968063000  | 2.631743000  | -2.146385000 |
| 6 | 1.827720000  | 3.083500000  | -0.092029000 |
| 6 | 0.632205000  | 2.016332000  | -1.892591000 |
| 1 | 5.943075000  | 1.225560000  | -2.630018000 |
| 6 | 0.850883000  | 4.074348000  | -0.028989000 |
| 1 | 2.692055000  | 3.125116000  | 0.571495000  |
| 6 | -0.336978000 | 3.016472000  | -1.838636000 |
| 1 | 0.558340000  | 1.222874000  | -2.638774000 |
| 6 | -0.230723000 | 4.046641000  | -0.906491000 |
| 1 | 0.945892000  | 4.879497000  | 0.698332000  |
| 1 | -1.172678000 | 2.997036000  | -2.537643000 |
| 1 | -0.984941000 | 4.831632000  | -0.869745000 |
| 6 | -2.608396000 | 1.109871000  | 0.533537000  |
| 1 | -2.493934000 | 2.000052000  | -0.097749000 |
| 6 | -1.693692000 | 2.529378000  | 2.380932000  |
| 1 | -1.492693000 | 3.249300000  | 1.579093000  |
| 1 | -2.444114000 | 2.965475000  | 3.058879000  |
| 1 | -0.776557000 | 2.394808000  | 2.972035000  |
| 6 | -2.517529000 | 0.198924000  | 2.906917000  |
| 1 | -2.692015000 | -0.807340000 | 2.508939000  |
| 1 | -1.699421000 | 0.143504000  | 3.638600000  |
| 1 | -3.418714000 | 0.506231000  | 3.460373000  |

Zero-point correction= 0.636432  
(Hartree/Particle)  
Thermal correction to Energy= 0.672272  
Thermal correction to Enthalpy= 0.673216  
Thermal correction to Gibbs Free Energy= 0.569580  
Sum of electronic and zero-point Energies= -1681.353299  
Sum of electronic and thermal Energies= -1681.317459  
Sum of electronic and thermal Enthalpies= -1681.316515  
Sum of electronic and thermal Free Energies= -1681.420152

E(M06/6-311+G(2d,p))= -1682.36240346

### Transition state TS<sub>XI-XII</sub>

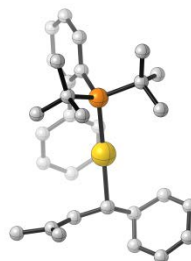

|    |              |              |              |
|----|--------------|--------------|--------------|
| 6  | -2.783455000 | -0.855021000 | -2.275683000 |
| 6  | -2.729219000 | 0.015574000  | 0.215019000  |
| 6  | -3.423664000 | -2.041273000 | -2.397695000 |
| 6  | -3.255480000 | 0.162550000  | -1.334450000 |
| 6  | -4.623310000 | -2.297509000 | -1.654541000 |
| 6  | -4.541701000 | -0.078736000 | -0.735139000 |
| 6  | -5.178923000 | -1.335483000 | -0.855469000 |
| 1  | -1.886016000 | -0.638975000 | -2.857659000 |
| 1  | -3.052551000 | -2.801508000 | -3.081959000 |
| 1  | -3.011756000 | 1.194599000  | -1.599074000 |
| 1  | -5.111930000 | -3.264331000 | -1.762225000 |
| 1  | -5.023814000 | 0.727055000  | -0.186911000 |
| 1  | -6.114916000 | -1.512739000 | -0.331126000 |
| 1  | -3.014633000 | -0.929435000 | 0.688646000  |
| 6  | -3.074259000 | 1.247967000  | 2.378005000  |
| 79 | -0.564615000 | -0.266032000 | 0.060293000  |
| 15 | 1.720554000  | -0.869540000 | 0.246941000  |
| 6  | 2.034657000  | -1.071247000 | 2.105332000  |
| 6  | 1.976477000  | -2.461833000 | -0.757641000 |
| 6  | 2.979132000  | 0.353153000  | -0.311771000 |
| 6  | 1.140086000  | -2.193891000 | 2.628673000  |
| 6  | 1.609097000  | 0.257102000  | 2.738868000  |
| 6  | 3.480154000  | -1.351297000 | 2.512235000  |
| 6  | 3.152247000  | -3.334013000 | -0.321966000 |
| 6  | 2.150501000  | -2.032950000 | -2.215094000 |
| 6  | 0.703055000  | -3.307686000 | -0.658848000 |
| 6  | 4.332113000  | -0.019853000 | -0.249857000 |
| 6  | 2.664626000  | 1.666816000  | -0.719103000 |
| 1  | 1.471026000  | -3.180631000 | 2.277613000  |
| 1  | 1.187543000  | -2.201568000 | 3.727924000  |
| 1  | 0.087465000  | -2.056187000 | 2.340789000  |
| 1  | 0.549723000  | 0.488646000  | 2.548218000  |
| 1  | 1.753604000  | 0.193904000  | 3.827933000  |
| 1  | 2.214187000  | 1.099502000  | 2.372548000  |
| 1  | 3.506076000  | -1.481576000 | 3.604691000  |
| 1  | 3.886031000  | -2.266784000 | 2.064340000  |
| 1  | 4.148477000  | -0.515754000 | 2.270738000  |
| 1  | 3.192536000  | -4.213047000 | -0.982982000 |
| 1  | 4.124118000  | -2.832988000 | -0.401167000 |
| 1  | 3.030173000  | -3.705081000 | 0.704172000  |
| 1  | 3.089700000  | -1.491768000 | -2.386389000 |
| 1  | 2.161203000  | -2.931482000 | -2.850135000 |
| 1  | 1.317193000  | -1.398627000 | -2.556454000 |
| 1  | 0.851588000  | -4.230046000 | -1.240354000 |
| 1  | 0.467182000  | -3.600000000 | 0.372075000  |
| 1  | -0.170532000 | -2.784636000 | -1.074006000 |
| 6  | 5.355202000  | 0.865764000  | -0.557547000 |
| 1  | 4.601260000  | -1.026993000 | 0.055559000  |
| 6  | 3.712183000  | 2.556063000  | -0.999220000 |
| 6  | 1.296853000  | 2.217214000  | -0.925786000 |
| 6  | 5.042605000  | 2.170052000  | -0.921943000 |
| 1  | 6.391147000  | 0.537049000  | -0.502219000 |
| 1  | 3.458787000  | 3.571954000  | -1.301696000 |
| 6  | 0.785351000  | 3.180138000  | -0.050263000 |
| 6  | 0.575643000  | 1.902685000  | -2.083519000 |
| 1  | 5.830714000  | 2.884627000  | -1.152525000 |
| 6  | -0.423321000 | 3.815589000  | -0.324115000 |
| 1  | 1.352807000  | 3.441302000  | 0.844090000  |
| 6  | -0.626762000 | 2.547857000  | -2.363759000 |
| 1  | 0.980241000  | 1.168525000  | -2.782369000 |
| 6  | -1.128246000 | 3.506743000  | -1.485523000 |
| 1  | -0.806736000 | 4.566876000  | 0.365304000  |

|   |              |              |              |
|---|--------------|--------------|--------------|
| 1 | -1.166217000 | 2.312307000  | -3.281136000 |
| 1 | -2.063148000 | 4.019251000  | -1.709983000 |
| 6 | -2.862742000 | 1.220448000  | 1.045911000  |
| 1 | -2.668222000 | 2.170311000  | 0.535655000  |
| 6 | -2.976706000 | 2.526461000  | 3.147030000  |
| 1 | -2.749831000 | 3.383528000  | 2.499860000  |
| 1 | -3.911174000 | 2.739319000  | 3.689149000  |
| 1 | -2.187983000 | 2.464414000  | 3.914429000  |
| 6 | -3.323579000 | 0.017490000  | 3.193229000  |
| 1 | -3.818228000 | -0.780803000 | 2.624018000  |
| 1 | -2.380342000 | -0.398234000 | 3.586711000  |
| 1 | -3.950186000 | 0.246436000  | 4.066404000  |

Zero-point correction= 0.636358  
(Hartree/Particle)  
Thermal correction to Energy= 0.671806  
Thermal correction to Enthalpy= 0.672750  
Thermal correction to Gibbs Free Energy= 0.570179  
Sum of electronic and zero-point Energies= -1681.309276  
Sum of electronic and thermal Energies= -1681.273829  
Sum of electronic and thermal Enthalpies= -1681.272884  
Sum of electronic and thermal Free Energies= -1681.375455

E(M06/6-311+G(2d,p))= -1682.31755483

### Intermediate XII

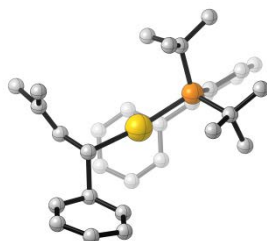

|    |              |              |              |
|----|--------------|--------------|--------------|
| 6  | -2.857111000 | -0.839564000 | -2.172261000 |
| 6  | -2.655152000 | -0.021096000 | 0.275437000  |
| 6  | -3.570083000 | -1.966193000 | -2.450293000 |
| 6  | -3.351509000 | 0.160760000  | -1.235908000 |
| 6  | -4.849975000 | -2.146868000 | -1.866308000 |
| 6  | -4.712200000 | -0.015969000 | -0.789326000 |
| 6  | -5.420129000 | -1.181805000 | -1.050738000 |
| 1  | -1.869007000 | -0.686687000 | -2.610336000 |
| 1  | -3.174827000 | -2.724798000 | -3.121673000 |
| 1  | -3.059752000 | 1.188277000  | -1.484752000 |
| 1  | -5.398438000 | -3.064486000 | -2.074454000 |
| 1  | -5.144004000 | 0.757055000  | -0.155293000 |
| 1  | -6.410020000 | -1.330878000 | -0.626971000 |
| 1  | -3.043516000 | -0.954590000 | 0.705771000  |
| 6  | -3.115874000 | 1.136421000  | 2.457827000  |
| 79 | -0.536763000 | -0.283614000 | 0.081072000  |
| 15 | 1.773332000  | -0.854215000 | 0.229698000  |
| 6  | 2.107237000  | -1.073290000 | 2.083133000  |
| 6  | 2.048742000  | -2.434704000 | -0.789855000 |
| 6  | 3.013972000  | 0.386678000  | -0.334620000 |
| 6  | 1.229838000  | -2.212851000 | 2.600272000  |
| 6  | 1.665017000  | 0.239815000  | 2.737239000  |
| 6  | 3.558759000  | -1.337635000 | 2.477960000  |
| 6  | 3.231859000  | -3.301430000 | -0.363832000 |
| 6  | 2.220884000  | -1.991704000 | -2.243503000 |
| 6  | 0.781959000  | -3.292974000 | -0.702789000 |
| 6  | 4.373621000  | 0.035550000  | -0.291630000 |
| 6  | 2.672943000  | 1.691662000  | -0.748934000 |
| 1  | 1.565624000  | -3.192082000 | 2.232965000  |
| 1  | 1.289288000  | -2.235188000 | 3.698845000  |
| 1  | 0.172872000  | -2.080219000 | 2.325503000  |
| 1  | 0.600796000  | 0.457838000  | 2.555298000  |
| 1  | 1.815628000  | 0.163571000  | 3.824791000  |
| 1  | 2.256140000  | 1.096245000  | 2.380929000  |
| 1  | 3.595569000  | -1.478726000 | 3.568877000  |

|   |              |              |              |
|---|--------------|--------------|--------------|
| 1 | 3.974319000  | -2.242440000 | 2.017240000  |
| 1 | 4.213876000  | -0.490497000 | 2.239950000  |
| 1 | 3.287132000  | -4.167888000 | -1.040395000 |
| 1 | 4.197920000  | -2.786916000 | -0.427319000 |
| 1 | 3.108888000  | -3.692767000 | 0.654654000  |
| 1 | 3.159996000  | -1.449262000 | -2.411074000 |
| 1 | 2.230681000  | -2.883907000 | -2.887589000 |
| 1 | 1.387849000  | -1.353523000 | -2.578348000 |
| 1 | 0.939053000  | -4.207286000 | -1.294862000 |
| 1 | 0.547611000  | -3.598858000 | 0.324573000  |
| 1 | -0.096885000 | -2.772395000 | -1.111150000 |
| 6 | 5.377534000  | 0.932663000  | -0.628357000 |
| 1 | 4.662255000  | -0.964733000 | 0.019216000  |
| 6 | 3.701385000  | 2.592463000  | -1.061271000 |
| 6 | 1.292700000  | 2.223662000  | -0.923010000 |
| 6 | 5.038616000  | 2.226811000  | -2.005257000 |
| 1 | 6.419353000  | 0.620712000  | -0.587046000 |
| 1 | 3.427783000  | 3.601556000  | -1.369046000 |
| 6 | 0.781374000  | 3.159028000  | -0.017897000 |
| 6 | 0.552097000  | 1.916747000  | -2.070106000 |
| 1 | 5.811640000  | 2.949378000  | -1.260802000 |
| 6 | -0.448655000 | 3.769894000  | -0.248580000 |
| 1 | 1.363871000  | 3.416865000  | 0.867651000  |
| 6 | -0.673278000 | 2.536192000  | -2.306559000 |
| 1 | 0.955246000  | 1.203682000  | -2.791252000 |
| 6 | -1.175771000 | 3.465134000  | -1.397487000 |
| 1 | -0.833512000 | 4.497281000  | 0.465322000  |
| 1 | -1.230017000 | 2.303215000  | -3.214326000 |
| 1 | -2.129445000 | 3.956854000  | -1.587435000 |
| 6 | -2.867591000 | 1.155116000  | 1.131338000  |
| 1 | -2.688168000 | 2.127250000  | 0.657154000  |
| 6 | -3.082709000 | 2.392854000  | 3.268306000  |
| 1 | -2.879265000 | 3.278782000  | 2.652751000  |
| 1 | -4.034569000 | 2.551093000  | 3.798902000  |
| 1 | -2.305597000 | 2.337979000  | 4.048051000  |
| 6 | -3.327809000 | -0.127524000 | 3.232021000  |
| 1 | -3.801304000 | -0.919807000 | 2.636455000  |
| 1 | -2.369918000 | -0.531171000 | 3.603207000  |
| 1 | -3.954973000 | 0.053138000  | 4.115824000  |

Zero-point correction= 0.635640  
(Hartree/Particle)  
Thermal correction to Energy= 0.672094  
Thermal correction to Enthalpy= 0.673038  
Thermal correction to Gibbs Free Energy= 0.566411  
Sum of electronic and zero-point Energies= -1681.310798  
Sum of electronic and thermal Energies= -1681.274344  
Sum of electronic and thermal Enthalpies= -1681.273400  
Sum of electronic and thermal Free Energies= -1681.380027

E(M06/6-311+G(2d,p))= -1682.31828441

### Transition state TS<sub>XII-XIII</sub>

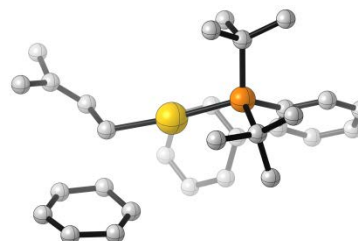

|   |             |              |              |
|---|-------------|--------------|--------------|
| 6 | 2.307202000 | 0.398882000  | 2.380961000  |
| 6 | 2.580385000 | -0.292657000 | -0.213813000 |
| 6 | 2.819778000 | -0.485506000 | 3.299239000  |
| 6 | 3.089567000 | 0.829566000  | 1.262166000  |
| 6 | 4.158725000 | -0.902304000 | 3.189934000  |
| 6 | 4.466472000 | 0.470664000  | 1.248500000  |
| 6 | 4.985313000 | -0.412894000 | 2.182760000  |
| 1 | 1.279986000 | 0.754182000  | 2.464678000  |
| 1 | 2.205858000 | -0.846031000 | 4.121920000  |
| 1 | 2.784429000 | 1.757100000  | 0.768134000  |

|    |              |              |              |
|----|--------------|--------------|--------------|
| 1  | 4.556959000  | -1.610480000 | 3.915001000  |
| 1  | 5.092817000  | 0.843274000  | 0.439334000  |
| 1  | 6.025672000  | -0.724300000 | 2.126112000  |
| 1  | 3.050433000  | -1.229584000 | 0.106293000  |
| 6  | 4.121606000  | -0.277670000 | -2.192394000 |
| 79 | 0.472292000  | -0.363676000 | -0.130417000 |
| 15 | -1.875240000 | -0.851132000 | -0.096452000 |
| 6  | -2.261331000 | -1.789442000 | -1.695372000 |
| 6  | -2.207912000 | -1.862384000 | 1.484694000  |
| 6  | -3.051575000 | 0.568300000  | -0.018956000 |
| 6  | -1.456677000 | -3.089036000 | -1.699893000 |
| 6  | -1.764915000 | -0.891309000 | -2.831334000 |
| 6  | -3.731737000 | -2.111304000 | -1.952975000 |
| 6  | -3.457206000 | -2.738651000 | 1.462859000  |
| 6  | -2.304247000 | -0.853939000 | 2.631811000  |
| 6  | -1.001467000 | -2.767320000 | 1.752474000  |
| 6  | -4.426013000 | 0.291308000  | 0.077186000  |
| 6  | -2.636609000 | 1.915665000  | 0.062092000  |
| 1  | -1.843550000 | -3.818563000 | -0.976491000 |
| 1  | -1.534557000 | -3.546157000 | -2.697860000 |
| 1  | -0.389667000 | -2.921154000 | -1.492728000 |
| 1  | -0.687734000 | -0.682225000 | -2.751497000 |
| 1  | -1.941638000 | -1.399910000 | -3.791258000 |
| 1  | -2.304964000 | 0.065895000  | -2.860893000 |
| 1  | -3.791675000 | -2.711365000 | -2.873796000 |
| 1  | -4.194231000 | -2.699297000 | -1.151027000 |
| 1  | -4.331707000 | -1.208668000 | -2.121030000 |
| 1  | -3.546229000 | -3.238613000 | 2.439575000  |
| 1  | -4.382647000 | -2.172110000 | 1.310003000  |
| 1  | -3.395516000 | -3.526076000 | 0.700744000  |
| 1  | -3.210896000 | -0.237513000 | 2.578666000  |
| 1  | -2.330062000 | -1.405594000 | 3.583570000  |
| 1  | -1.432529000 | -0.181708000 | 2.665639000  |
| 1  | -1.180465000 | -3.315929000 | 2.689630000  |
| 1  | -0.840954000 | -3.511043000 | 0.961962000  |
| 1  | -0.072014000 | -2.191857000 | 1.871262000  |
| 6  | -5.369984000 | 1.292132000  | 0.261223000  |
| 1  | -4.776538000 | -0.734959000 | 0.016390000  |
| 6  | -3.602948000 | 2.911419000  | 0.265797000  |
| 6  | -1.241837000 | 2.413536000  | -0.079242000 |
| 6  | -4.954042000 | 2.613995000  | 0.366353000  |
| 1  | -6.425236000 | 1.034103000  | 0.328119000  |
| 1  | -3.271104000 | 3.947742000  | 0.326958000  |
| 6  | -0.608556000 | 2.428571000  | -1.327622000 |
| 6  | -0.602248000 | 3.017571000  | 1.008664000  |
| 1  | -5.678764000 | 3.411987000  | 0.517751000  |
| 6  | 0.632923000  | 3.038197000  | -1.484577000 |
| 1  | -1.111107000 | 1.984521000  | -2.187172000 |
| 6  | 0.646991000  | 3.614557000  | 0.855279000  |
| 1  | -1.099781000 | 3.030085000  | 1.979354000  |
| 6  | 1.265186000  | 3.631925000  | -0.393373000 |
| 1  | 1.101892000  | 3.060421000  | -2.467781000 |
| 1  | 1.131317000  | 4.082794000  | 1.711565000  |
| 1  | 2.232778000  | 4.116840000  | -0.519124000 |
| 6  | 3.151577000  | 0.277145000  | -1.423093000 |
| 1  | 2.683201000  | 1.193513000  | -1.796494000 |
| 6  | 4.461519000  | 0.310019000  | -3.522342000 |
| 1  | 3.862914000  | 1.199290000  | -3.753505000 |
| 1  | 5.526701000  | 0.584854000  | -3.560750000 |
| 1  | 4.309017000  | -0.426760000 | -4.325729000 |
| 6  | 4.894294000  | -1.503065000 | -1.833688000 |
| 1  | 4.787906000  | -1.802815000 | -0.784949000 |
| 1  | 4.583380000  | -2.355631000 | -2.457099000 |
| 1  | 5.962423000  | -1.346703000 | -2.043656000 |

Zero-point correction= 0.634645  
(Hartree/Particle)  
Thermal correction to Energy= 0.670811  
Thermal correction to Enthalpy= 0.671755  
Thermal correction to Gibbs Free Energy= 0.567128  
Sum of electronic and zero-point Energies= -1681.311017  
Sum of electronic and thermal Energies= -1681.274851  
Sum of electronic and thermal Enthalpies= -1681.273907  
Sum of electronic and thermal Free Energies= -1681.378534

E(M06/6-311+G(2d,p))= -1682.3174645

### Intermediate XIII

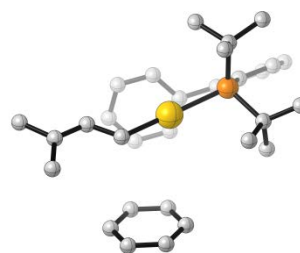

|    |              |              |              |
|----|--------------|--------------|--------------|
| 6  | 2.072148000  | -0.797945000 | 2.579915000  |
| 6  | 2.458480000  | -0.178345000 | -0.874707000 |
| 6  | 2.138836000  | -2.188430000 | 2.640352000  |
| 6  | 3.202933000  | -0.058332000 | 2.234292000  |
| 6  | 3.337091000  | -2.840859000 | 2.354273000  |
| 6  | 4.404072000  | -0.710989000 | 1.961877000  |
| 6  | 4.471176000  | -2.102033000 | 2.021095000  |
| 1  | 1.136407000  | -0.285740000 | 2.804700000  |
| 1  | 1.256045000  | -2.766154000 | 2.914830000  |
| 1  | 3.143909000  | 1.029554000  | 2.180462000  |
| 1  | 3.390799000  | -3.927468000 | 2.404090000  |
| 1  | 5.291789000  | -0.132506000 | 1.706324000  |
| 1  | 5.410533000  | -2.611901000 | 1.809848000  |
| 1  | 3.049138000  | -1.060220000 | -0.596031000 |
| 6  | 4.543305000  | 0.785799000  | -1.767720000 |
| 79 | 0.437654000  | -0.244445000 | -0.569734000 |
| 15 | -1.943863000 | -0.646694000 | -0.446359000 |
| 6  | -2.574930000 | -0.778387000 | -2.226968000 |
| 6  | -2.175050000 | -2.247604000 | 0.560427000  |
| 6  | -2.983947000 | 0.622515000  | 0.396603000  |
| 6  | -1.880551000 | -1.961751000 | -2.899994000 |
| 6  | -2.139454000 | 0.513648000  | -2.922610000 |
| 6  | -4.086103000 | -0.921590000 | -2.388923000 |
| 6  | -3.477798000 | -3.010470000 | 0.331451000  |
| 6  | -2.067236000 | -1.844628000 | 2.032633000  |
| 6  | -1.013779000 | -3.191874000 | 0.231827000  |
| 6  | -4.352276000 | 0.354169000  | 0.569107000  |
| 6  | -2.453179000 | 1.790412000  | 0.988637000  |
| 1  | -2.244507000 | -2.926672000 | -2.523264000 |
| 1  | -2.096089000 | -1.929782000 | -3.978696000 |
| 1  | -0.788101000 | -1.927707000 | -2.777603000 |
| 1  | -1.047084000 | 0.642395000  | -2.908900000 |
| 1  | -2.462696000 | 0.476482000  | -3.973930000 |
| 1  | -2.600515000 | 1.402186000  | -2.467343000 |
| 1  | -4.307187000 | -1.027054000 | -3.461986000 |
| 1  | -4.490660000 | -1.807051000 | -1.883879000 |
| 1  | -4.625879000 | -0.034871000 | -2.034111000 |
| 1  | -3.483772000 | -3.888997000 | 0.994927000  |
| 1  | -4.373493000 | -2.426839000 | 0.572154000  |
| 1  | -3.567046000 | -3.384487000 | -0.696686000 |
| 1  | -2.945017000 | -1.282403000 | 2.376696000  |
| 1  | -1.987690000 | -2.754644000 | 2.646269000  |
| 1  | -1.172479000 | -1.233868000 | 2.229242000  |
| 1  | -1.126900000 | -4.107024000 | 0.832894000  |
| 1  | -0.997784000 | -3.490774000 | -0.823873000 |
| 1  | -0.036859000 | -2.749982000 | 0.474016000  |
| 6  | -5.178297000 | 1.180444000  | 1.318298000  |
| 1  | -4.790027000 | -0.531453000 | 0.117084000  |
| 6  | -3.298190000 | 2.600455000  | 1.761076000  |
| 6  | -1.058166000 | 2.286691000  | 0.845833000  |
| 6  | -4.642958000 | 2.306730000  | 1.932065000  |
| 1  | -6.233281000 | 0.936054000  | 1.427252000  |
| 1  | -2.877693000 | 3.495871000  | 2.218567000  |
| 6  | -0.596540000 | 2.795482000  | -0.374245000 |
| 6  | -0.234110000 | 2.389597000  | 1.972109000  |
| 1  | -5.270605000 | 2.960179000  | 2.535498000  |
| 6  | 0.658955000  | 3.390279000  | -0.464620000 |
| 1  | -1.242332000 | 2.749187000  | -1.251365000 |
| 6  | 1.026571000  | 2.974275000  | 2.974275000  |
| 1  | -0.595033000 | 2.015565000  | 2.931361000  |
| 6  | 1.475556000  | 3.478901000  | 0.661302000  |
| 1  | 0.995975000  | 3.795915000  | -1.418156000 |

|   |             |              |              |
|---|-------------|--------------|--------------|
| 1 | 1.653421000 | 3.046199000  | 2.767662000  |
| 1 | 2.456237000 | 3.947922000  | 0.589993000  |
| 6 | 3.183034000 | 0.846515000  | -1.470410000 |
| 1 | 2.666214000 | 1.766439000  | -1.756524000 |
| 6 | 5.196043000 | 1.940604000  | -2.419888000 |
| 1 | 4.482365000 | 2.679247000  | -2.797435000 |
| 1 | 5.849612000 | 2.430797000  | -1.679794000 |
| 1 | 5.862185000 | 1.609008000  | -3.228315000 |
| 6 | 5.421485000 | -0.370846000 | -1.494952000 |
| 1 | 4.997643000 | -1.122557000 | -0.824030000 |
| 1 | 5.657504000 | -0.856010000 | -2.455401000 |
| 1 | 6.383533000 | -0.019876000 | -1.096801000 |

Zero-point correction= 0.635216  
(Hartree/Particle)  
Thermal correction to Energy= 0.671978  
Thermal correction to Enthalpy= 0.672922  
Thermal correction to Gibbs Free Energy= 0.567139  
Sum of electronic and zero-point Energies= -1681.331335  
Sum of electronic and thermal Energies= -1681.294573  
Sum of electronic and thermal Enthalpies= -1681.293629  
Sum of electronic and thermal Free Energies= -1681.399412

E(M06/6-311+G(2d,p))= -1682.34090845

#### Intermediate XIV

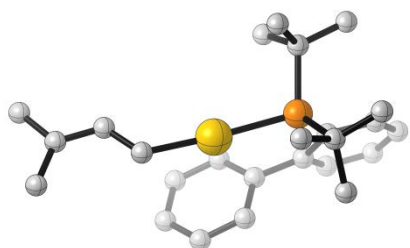

|    |              |              |              |
|----|--------------|--------------|--------------|
| 79 | -0.828228000 | -0.631236000 | -0.232858000 |
| 15 | 1.571602000  | -0.706593000 | 0.017243000  |
| 6  | 1.887434000  | -1.510710000 | 1.704938000  |
| 6  | 2.312180000  | -1.661185000 | -1.445838000 |
| 6  | -2.862277000 | -0.699456000 | -0.385274000 |
| 1  | -3.321994000 | -0.827990000 | -1.373389000 |
| 6  | -3.756124000 | -0.538874000 | 0.662217000  |
| 1  | -3.371753000 | -0.422587000 | 1.678521000  |
| 6  | -5.142722000 | -0.465076000 | 0.516541000  |
| 6  | 2.424204000  | 0.925910000  | 0.107254000  |
| 6  | 3.820490000  | 0.948449000  | 0.260173000  |
| 6  | 1.730396000  | 2.156335000  | 0.124888000  |
| 6  | 4.520690000  | 2.130443000  | 0.460496000  |
| 1  | 4.384771000  | 0.019830000  | 0.232803000  |
| 6  | 2.450548000  | 3.336330000  | 0.359658000  |
| 6  | 3.827362000  | 3.333166000  | 0.529214000  |
| 1  | 5.603082000  | 2.105451000  | 0.570861000  |
| 1  | 1.904932000  | 4.279546000  | 0.380686000  |
| 1  | 4.356449000  | 4.268998000  | 0.700654000  |
| 6  | 0.278009000  | 2.342807000  | -0.140730000 |
| 6  | -0.571810000 | 2.814059000  | 0.865550000  |
| 6  | -0.228801000 | 2.195514000  | -1.438024000 |
| 6  | -1.900487000 | 3.123977000  | 0.583633000  |
| 1  | -0.177932000 | 2.952665000  | 1.873151000  |
| 6  | -1.554703000 | 2.516469000  | -1.722190000 |
| 1  | 0.434641000  | 1.855550000  | -2.234778000 |
| 6  | -2.393152000 | 2.982482000  | -0.711725000 |
| 1  | -2.547525000 | 3.496535000  | 1.376598000  |
| 1  | -1.927848000 | 2.414327000  | -2.740454000 |
| 1  | -3.426913000 | 3.242370000  | -0.936138000 |
| 6  | 3.669559000  | -2.308492000 | -1.192051000 |
| 1  | 3.984711000  | -2.824602000 | -2.111782000 |
| 1  | 4.455168000  | -1.583153000 | -0.948806000 |
| 1  | 3.627267000  | -3.062092000 | -0.395163000 |
| 6  | 2.416687000  | -0.671545000 | -2.607006000 |
| 1  | 3.171628000  | 0.106242000  | -2.433830000 |
| 1  | 2.705976000  | -1.222374000 | -3.514544000 |

|   |              |              |              |
|---|--------------|--------------|--------------|
| 1 | 1.454112000  | -0.179460000 | -2.813112000 |
| 6 | 1.321407000  | -2.758071000 | -1.847020000 |
| 1 | 1.723558000  | -3.290613000 | -2.722082000 |
| 1 | 1.162595000  | -3.498454000 | -1.053290000 |
| 1 | 0.342308000  | -2.342173000 | -2.125171000 |
| 6 | 1.326159000  | -2.931589000 | 1.671657000  |
| 1 | 1.919205000  | -3.595136000 | 1.027280000  |
| 1 | 1.357609000  | -3.347879000 | 2.689929000  |
| 1 | 0.280172000  | -2.958389000 | 1.332181000  |
| 6 | 1.087571000  | -0.670113000 | 2.704678000  |
| 1 | 0.012105000  | -0.661134000 | 2.471577000  |
| 1 | 1.213568000  | -1.095682000 | 3.711797000  |
| 1 | 1.439102000  | 0.371471000  | 2.737098000  |
| 6 | 3.339856000  | -1.554019000 | 2.173503000  |
| 1 | 3.369895000  | -2.068815000 | 3.145712000  |
| 1 | 3.997302000  | -2.106606000 | 1.491415000  |
| 1 | 3.756048000  | -0.550462000 | 2.324416000  |
| 6 | -5.986457000 | -0.270246000 | 1.711783000  |
| 1 | -6.773797000 | 0.472107000  | 1.520859000  |
| 1 | -6.515863000 | -1.216794000 | 1.912338000  |
| 1 | -5.413597000 | 0.002954000  | 2.603047000  |
| 6 | -5.863010000 | -0.545125000 | -0.770633000 |
| 1 | -6.142515000 | 0.479981000  | -1.063583000 |
| 1 | -5.290628000 | -0.987513000 | -1.589267000 |
| 1 | -6.807942000 | -1.088230000 | -0.642513000 |

Zero-point correction= 0.532776  
(Hartree/Particle)  
Thermal correction to Energy= 0.563814  
Thermal correction to Enthalpy= 0.564758  
Thermal correction to Gibbs Free Energy= 0.471453  
Sum of electronic and zero-point Energies= -1449.365928  
Sum of electronic and thermal Energies= -1449.334889  
Sum of electronic and thermal Enthalpies= -1449.333945  
Sum of electronic and thermal Free Energies= -1449.427250

E(M06/6-311+G(2d,p))= -1450.20559366

#### Intermediate c-VIc

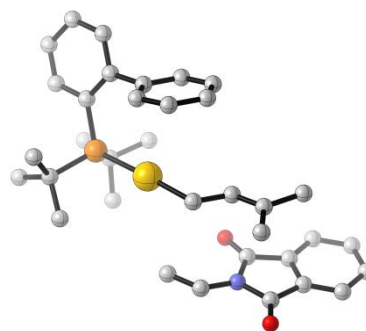

|    |              |              |              |
|----|--------------|--------------|--------------|
| 79 | 0.642664000  | -0.043778000 | -0.649787000 |
| 15 | 2.747463000  | -0.924096000 | 0.126996000  |
| 6  | 2.380380000  | -1.859361000 | 1.734493000  |
| 6  | 3.474247000  | -2.026403000 | -1.238778000 |
| 6  | -1.204476000 | 0.591483000  | -1.260732000 |
| 1  | -1.491387000 | 0.535329000  | -2.318077000 |
| 6  | -1.839405000 | -2.375505000 | -1.349996000 |
| 1  | -1.403406000 | -2.492888000 | -0.363341000 |
| 1  | -1.251744000 | -2.672759000 | -2.215685000 |
| 6  | -3.083374000 | -1.925211000 | -1.543428000 |
| 1  | -3.526607000 | -1.852862000 | -2.536317000 |
| 6  | -2.132227000 | 1.206576000  | -0.421301000 |
| 1  | -1.904226000 | 1.292405000  | 0.644626000  |
| 6  | -3.299611000 | 1.821826000  | -0.854523000 |
| 6  | 4.035178000  | 0.313713000  | 0.585930000  |
| 6  | 5.302023000  | -0.147169000 | 0.982774000  |
| 6  | 3.790273000  | 1.703322000  | 0.621621000  |
| 6  | 6.295580000  | 0.716165000  | 1.423115000  |
| 1  | 5.523805000  | -1.210679000 | 0.957257000  |
| 6  | 4.797438000  | 2.558353000  | 1.090792000  |



|   |              |              |              |
|---|--------------|--------------|--------------|
| 6 | 6.036896000  | 2.080096000  | 1.490724000  |
| 1 | 7.264144000  | 0.319154000  | 1.721189000  |
| 1 | 4.592277000  | 3.628293000  | 1.122244000  |
| 1 | 6.798578000  | 2.771814000  | 1.846221000  |
| 6 | 2.545477000  | 2.384511000  | 0.169251000  |
| 6 | 1.666030000  | 2.940808000  | 1.103445000  |
| 6 | 2.318551000  | 2.612488000  | -1.193122000 |
| 6 | 0.572013000  | 3.694465000  | 0.685021000  |
| 1 | 1.853227000  | 2.790441000  | 2.167381000  |
| 6 | 1.231750000  | 3.377659000  | -1.611079000 |
| 1 | 3.017837000  | 2.206825000  | -1.925813000 |
| 6 | 0.354215000  | 3.916420000  | -0.672790000 |
| 1 | -0.104274000 | 4.122218000  | 1.424283000  |
| 1 | 1.077876000  | 3.561189000  | -2.673822000 |
| 1 | -0.492880000 | 4.519284000  | -0.998529000 |
| 6 | 4.453363000  | -3.103675000 | -0.780009000 |
| 1 | 4.794960000  | -3.659199000 | -1.666835000 |
| 1 | 5.349524000  | -2.699679000 | -0.294305000 |
| 1 | 3.985038000  | -3.830475000 | -0.104118000 |
| 6 | 4.163409000  | -1.090312000 | -2.232618000 |
| 1 | 5.070039000  | -0.631324000 | -1.817292000 |
| 1 | 4.456857000  | -1.669498000 | -3.120908000 |
| 1 | 3.493321000  | -0.285486000 | -2.571461000 |
| 6 | 2.309952000  | -2.712746000 | -1.960928000 |
| 1 | 2.717772000  | -3.333548000 | -2.773143000 |
| 1 | 1.726962000  | -3.370271000 | -1.302812000 |
| 1 | 1.621766000  | -1.981584000 | -2.408942000 |
| 6 | 1.454253000  | -3.029067000 | 1.409378000  |
| 1 | 1.968906000  | -3.830762000 | 0.862676000  |
| 1 | 1.081207000  | -3.459326000 | 2.351083000  |
| 1 | 0.581738000  | -2.709447000 | 0.821417000  |
| 6 | 1.634612000  | -0.865409000 | 2.629031000  |
| 1 | 0.703302000  | -0.506380000 | 2.164645000  |
| 1 | 1.370146000  | -1.366741000 | 3.572389000  |
| 1 | 2.254529000  | 0.006754000  | 2.881871000  |
| 6 | 3.599275000  | -2.370153000 | 2.497762000  |
| 1 | 3.246396000  | -2.920748000 | 3.382970000  |
| 1 | 4.218750000  | -3.056847000 | 1.908322000  |
| 1 | 4.234404000  | -1.550412000 | 2.856761000  |
| 7 | -3.964024000 | -1.484896000 | -0.553171000 |
| 6 | -5.285569000 | -1.085641000 | -0.874223000 |
| 6 | -3.687383000 | -1.280733000 | 0.817484000  |
| 6 | -5.874199000 | -0.585642000 | 0.383205000  |
| 6 | -4.919091000 | -0.693186000 | 1.390646000  |
| 8 | -5.768015000 | -1.142687000 | -1.981796000 |
| 8 | -2.640687000 | -1.532456000 | 1.371684000  |
| 6 | -7.123625000 | -0.041608000 | 0.618972000  |
| 1 | -7.863140000 | 0.040152000  | -0.175495000 |
| 6 | -5.173074000 | -0.258706000 | 2.678327000  |
| 1 | -4.421519000 | -0.344439000 | 3.461010000  |
| 6 | -7.390661000 | 0.400258000  | 1.918044000  |
| 1 | -8.360943000 | 0.836140000  | 2.147500000  |
| 6 | -6.432607000 | 0.294227000  | 2.928255000  |
| 1 | -6.672924000 | 0.648758000  | 3.928587000  |
| 6 | -4.120841000 | 2.591775000  | 0.105271000  |
| 1 | -4.334903000 | 3.592796000  | -0.298245000 |
| 1 | -5.104328000 | 2.102931000  | 0.212834000  |
| 1 | -3.657004000 | 2.682882000  | 1.093159000  |
| 6 | -3.786449000 | 1.808245000  | -2.254187000 |
| 1 | -3.420918000 | 2.714989000  | -2.762177000 |
| 1 | -3.449744000 | 0.942975000  | -2.834591000 |
| 1 | -4.882002000 | 1.864145000  | -2.280106000 |

Zero-point correction= 0.684999  
(Hartree/Particle)  
Thermal correction to Energy= 0.726889  
Thermal correction to Enthalpy= 0.727833  
Thermal correction to Gibbs Free Energy= 0.610755  
Sum of electronic and zero-point Energies= -2039.332630  
Sum of electronic and thermal Energies= -2039.290740  
Sum of electronic and thermal Enthalpies= -2039.289796  
Sum of electronic and thermal Free Energies= -2039.406874

E(M06/6-311+G(2d,p))= -2040.49425754

### Intermediate *t*-VIc

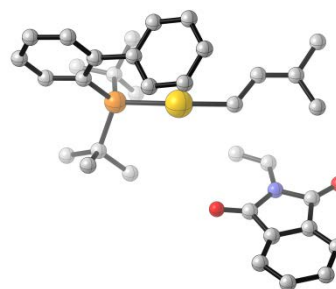

|    |              |              |              |
|----|--------------|--------------|--------------|
| 79 | 0.527067000  | 0.294793000  | 0.345170000  |
| 15 | 2.578575000  | -0.967841000 | 0.406617000  |
| 6  | 3.302629000  | -0.695776000 | 2.137255000  |
| 6  | 2.193749000  | -2.787270000 | 0.012116000  |
| 6  | -1.221525000 | 1.346631000  | 0.490628000  |
| 1  | -2.112367000 | 0.995997000  | -0.046673000 |
| 6  | -2.105627000 | -0.917786000 | 2.395163000  |
| 1  | -1.628253000 | -0.541722000 | 3.297329000  |
| 1  | -1.583645000 | -1.670274000 | 1.812298000  |
| 6  | -3.317342000 | -0.454310000 | 2.079305000  |
| 6  | -1.383502000 | 2.543487000  | 1.184200000  |
| 1  | -0.528083000 | 2.963110000  | 1.719752000  |
| 6  | -2.563522000 | 3.277693000  | 1.235656000  |
| 6  | 3.911039000  | -0.417838000 | -0.745271000 |
| 6  | 5.103188000  | -1.159533000 | -0.787038000 |
| 6  | 3.826887000  | 0.755296000  | -1.527286000 |
| 6  | 6.191531000  | -0.765989000 | -1.553364000 |
| 1  | 5.194185000  | -2.067818000 | -0.197714000 |
| 6  | 4.945341000  | 1.150766000  | -2.275186000 |
| 6  | 6.116301000  | 0.407211000  | -2.294645000 |
| 1  | 7.095660000  | -1.371814000 | -1.560308000 |
| 1  | 4.873962000  | 2.062538000  | -2.867829000 |
| 1  | 6.962843000  | 0.738949000  | -2.893251000 |
| 6  | 2.633772000  | 1.634850000  | -1.668378000 |
| 6  | 2.657323000  | 2.933559000  | -1.148877000 |
| 6  | 1.539238000  | 1.239599000  | -2.446669000 |
| 6  | 1.609635000  | 3.816883000  | -1.397872000 |
| 1  | 3.516487000  | 3.255499000  | -0.559119000 |
| 6  | 0.496869000  | 2.127496000  | -2.706615000 |
| 1  | 1.523197000  | 0.237806000  | -2.877899000 |
| 6  | 0.530754000  | 3.418730000  | -2.184198000 |
| 1  | 1.648256000  | 4.827017000  | -0.992683000 |
| 1  | -0.338142000 | 1.810783000  | -3.330549000 |
| 1  | -0.278115000 | 4.116278000  | -2.396795000 |
| 6  | 3.178004000  | -3.822676000 | 0.550677000  |
| 1  | 2.838122000  | -4.817383000 | 0.224095000  |
| 1  | 4.199496000  | -3.698557000 | 0.173376000  |
| 1  | 3.206424000  | -3.837344000 | 1.647616000  |
| 6  | 2.115813000  | -2.892712000 | -1.511710000 |
| 1  | 3.093219000  | -2.757135000 | -1.992101000 |
| 1  | 1.745050000  | -3.893725000 | -1.778239000 |
| 1  | 1.415847000  | -2.159470000 | -1.939728000 |
| 6  | 0.809816000  | -3.107288000 | 0.585818000  |
| 1  | 0.560078000  | -4.150152000 | 0.336702000  |
| 1  | 0.773997000  | -3.012916000 | 1.679101000  |
| 1  | 0.027873000  | -2.465463000 | 0.156500000  |
| 6  | 2.322757000  | -1.254798000 | 3.167937000  |
| 1  | 2.296703000  | -2.352507000 | 3.165885000  |
| 1  | 2.645230000  | -0.937124000 | 4.171080000  |
| 1  | 1.300529000  | -0.878716000 | 3.012942000  |
| 6  | 3.395530000  | 0.822934000  | 2.310106000  |
| 1  | 2.413095000  | 1.311622000  | 2.222764000  |
| 1  | 3.796208000  | 1.042245000  | 3.311428000  |
| 1  | 4.075177000  | 1.278787000  | 1.576032000  |
| 6  | 4.686977000  | -1.291390000 | 2.380716000  |
| 1  | 4.964874000  | -1.097887000 | 3.427965000  |
| 1  | 4.719919000  | -2.376756000 | 2.226579000  |
| 1  | 5.455498000  | -0.826300000 | 1.750695000  |
| 1  | -3.831539000 | 0.282672000  | 2.695418000  |

|   |              |              |              |
|---|--------------|--------------|--------------|
| 7 | -4.086518000 | -0.810165000 | 0.965527000  |
| 6 | -3.715695000 | -1.645472000 | -0.110509000 |
| 6 | -5.388630000 | -0.286705000 | 0.779466000  |
| 6 | -4.880097000 | -1.665266000 | -1.022863000 |
| 6 | -5.877625000 | -0.850935000 | -0.493913000 |
| 8 | -2.647010000 | -2.201354000 | -0.236277000 |
| 8 | -5.934029000 | 0.480538000  | 1.540763000  |
| 6 | -7.084798000 | -0.665657000 | -1.142188000 |
| 1 | -7.858664000 | -0.026485000 | -0.721533000 |
| 6 | -5.046557000 | -2.328808000 | -2.224180000 |
| 1 | -4.262550000 | -2.964411000 | -2.631516000 |
| 6 | -6.263081000 | -2.149121000 | -2.887892000 |
| 1 | -6.435892000 | -2.654262000 | -3.836269000 |
| 6 | -7.263642000 | -1.332257000 | -2.357255000 |
| 1 | -8.199284000 | -1.214146000 | -2.900096000 |
| 6 | -3.841798000 | 2.865069000  | 0.619919000  |
| 1 | -4.527917000 | 2.542807000  | 1.420802000  |
| 1 | -4.325823000 | 3.728226000  | 0.143252000  |
| 1 | -3.758210000 | 2.050759000  | -0.105956000 |
| 6 | -2.591312000 | 4.561511000  | 1.969128000  |
| 1 | -2.722139000 | 5.381823000  | 1.245696000  |
| 1 | -3.469280000 | 4.607183000  | 2.629365000  |
| 1 | -1.679413000 | 4.744153000  | 2.546290000  |

Zero-point correction= 0.683947  
(Hartree/Particle)  
Thermal correction to Energy= 0.726342  
Thermal correction to Enthalpy= 0.727286  
Thermal correction to Gibbs Free Energy= 0.608462  
Sum of electronic and zero-point Energies= -2039.330645  
Sum of electronic and thermal Energies= -2039.288250  
Sum of electronic and thermal Enthalpies= -2039.287305  
Sum of electronic and thermal Free Energies= -2039.406130

E(M06/6-311+G(2d,p))= -2040.49067587

**Transition state TS<sub>c-(VIc-VIe)</sub>**

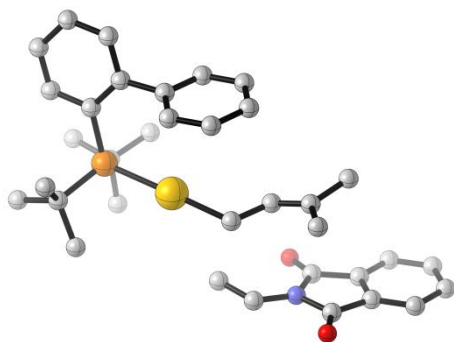

|    |              |              |              |
|----|--------------|--------------|--------------|
| 79 | 0.739210000  | -0.320577000 | -0.433892000 |
| 15 | 3.003755000  | -0.845680000 | 0.140916000  |
| 6  | 2.937879000  | -1.608738000 | 1.873095000  |
| 6  | 3.704334000  | -2.018007000 | -1.182435000 |
| 6  | -1.248115000 | 0.069243000  | -0.887614000 |
| 1  | -1.543947000 | 0.120636000  | -1.941190000 |
| 6  | -1.813863000 | -2.159111000 | -0.621556000 |
| 1  | -1.648938000 | -2.190705000 | 0.450358000  |
| 1  | -1.059268000 | -2.602989000 | -1.266288000 |
| 6  | -3.024437000 | -1.871923000 | -1.163825000 |
| 1  | -3.198935000 | -1.945822000 | -2.237281000 |
| 6  | -2.077798000 | 0.781517000  | 0.014904000  |
| 1  | -1.826790000 | 0.744872000  | 1.078910000  |
| 6  | -3.113304000 | 1.602901000  | -0.351309000 |
| 6  | 4.165681000  | 0.576537000  | 0.298996000  |
| 6  | 5.522109000  | 0.302708000  | 0.540674000  |
| 6  | 3.752772000  | 1.926460000  | 0.259448000  |
| 6  | 6.452710000  | 1.310611000  | 0.751642000  |
| 1  | 5.866828000  | -0.727712000 | 0.569800000  |
| 6  | 4.702347000  | 2.929930000  | 0.500875000  |
| 6  | 6.036141000  | 2.636672000  | 0.743770000  |
| 1  | 7.495611000  | 1.056145000  | 0.931248000  |
| 1  | 4.372360000  | 3.968281000  | 0.476549000  |

|   |              |              |              |
|---|--------------|--------------|--------------|
| 1 | 6.748576000  | 3.441176000  | 0.917418000  |
| 6 | 2.381931000  | 2.425186000  | -0.042364000 |
| 6 | 1.626604000  | 3.034039000  | 0.965340000  |
| 6 | 1.892046000  | 2.437848000  | -1.354054000 |
| 6 | 0.404121000  | 3.634369000  | 0.672854000  |
| 1 | 2.013099000  | 3.048285000  | 1.985043000  |
| 6 | 0.675422000  | 3.050954000  | -1.649350000 |
| 1 | 2.484659000  | 1.986008000  | -2.151018000 |
| 6 | -0.069395000 | 3.650725000  | -0.636627000 |
| 1 | -0.170559000 | 4.107369000  | 1.468373000  |
| 1 | 0.314156000  | 3.065193000  | -2.677380000 |
| 1 | -1.014508000 | 4.140950000  | -0.868057000 |
| 6 | 4.825490000  | -2.953232000 | -0.734229000 |
| 1 | 5.146469000  | -3.544347000 | -1.605585000 |
| 1 | 5.712952000  | -2.427400000 | -0.362840000 |
| 1 | 4.494140000  | -3.664578000 | 0.033253000  |
| 6 | 4.193546000  | -1.137755000 | -2.332893000 |
| 1 | 5.092321000  | -0.564634000 | -2.071775000 |
| 1 | 4.442014000  | -1.780488000 | -3.190618000 |
| 1 | 3.419040000  | -0.429639000 | -2.664928000 |
| 6 | 2.546574000  | -2.878826000 | -1.699698000 |
| 1 | 2.933170000  | -3.569746000 | -2.464197000 |
| 1 | 2.082498000  | -3.485372000 | -0.910343000 |
| 1 | 1.762741000  | -2.264575000 | -2.165739000 |
| 6 | 2.080386000  | -2.872001000 | 1.814394000  |
| 1 | 2.573891000  | -3.685167000 | 1.265904000  |
| 1 | 1.903419000  | -3.228674000 | 2.840241000  |
| 1 | 1.098415000  | -2.686340000 | 1.352410000  |
| 6 | 2.239473000  | -0.568013000 | -2.752512000 |
| 1 | 1.230855000  | -0.324116000 | 2.385282000  |
| 1 | 2.140234000  | -0.971221000 | 3.771733000  |
| 1 | 2.817435000  | 0.364827000  | 2.820571000  |
| 6 | 4.289632000  | -1.937070000 | 2.500469000  |
| 1 | 4.112759000  | -2.389099000 | 3.488210000  |
| 1 | 4.872566000  | -2.654544000 | 1.911117000  |
| 1 | 4.899286000  | -1.038351000 | 2.657967000  |
| 7 | -4.115325000 | -1.381955000 | -0.485476000 |
| 6 | -5.274838000 | -0.919531000 | -1.179202000 |
| 6 | -4.282008000 | -1.255162000 | 0.923478000  |
| 6 | -6.201029000 | -0.442863000 | -0.138840000 |
| 6 | -5.613290000 | -0.644925000 | 1.108205000  |
| 8 | -5.392422000 | -0.932815000 | -2.380354000 |
| 8 | -3.476650000 | -1.595165000 | 1.757148000  |
| 6 | -7.440735000 | 0.157594000  | -0.269288000 |
| 1 | -7.891759000 | 0.315198000  | -1.247258000 |
| 6 | -6.245033000 | -0.265174000 | 2.277981000  |
| 1 | -5.778605000 | -0.425979000 | 3.248085000  |
| 6 | -8.085487000 | 0.548159000  | 0.906991000  |
| 1 | -9.062137000 | 1.024147000  | 0.849299000  |
| 6 | -7.499292000 | 0.338476000  | 2.157515000  |
| 1 | -8.031006000 | 0.653487000  | 3.052998000  |
| 6 | -3.785427000 | 2.445723000  | 0.672790000  |
| 1 | -3.629796000 | 3.512938000  | 0.447821000  |
| 1 | -4.875606000 | 2.290593000  | 0.642041000  |
| 1 | -3.423444000 | 2.245453000  | 1.688256000  |
| 6 | -3.570944000 | 1.802641000  | -1.755070000 |
| 1 | -3.034101000 | 2.652642000  | -2.205569000 |
| 1 | -3.401217000 | 0.931297000  | -2.398789000 |
| 1 | -4.638175000 | 2.060464000  | -1.781803000 |

Zero-point correction= 0.684364  
(Hartree/Particle)  
Thermal correction to Energy= 0.725354  
Thermal correction to Enthalpy= 0.726299  
Thermal correction to Gibbs Free Energy= 0.611867  
Sum of electronic and zero-point Energies= -2039.330507  
Sum of electronic and thermal Energies= -2039.289516  
Sum of electronic and thermal Enthalpies= -2039.288572  
Sum of electronic and thermal Free Energies= -2039.403004

E(M06/6-311+G(2d,p))= -2040.49055673  
E(PBE/6-311+G(2d,p))= -2039.512107  
E(PBE-D3(BJ)/6-311+G(2d,p))= -2039.6536124

Transition state TS<sub>r</sub>(VIc-VIId)

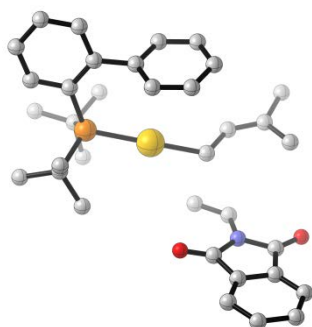

|    |              |              |              |
|----|--------------|--------------|--------------|
| 79 | 0.509907000  | 0.127030000  | 0.380585000  |
| 15 | 2.592058000  | -1.055115000 | 0.334887000  |
| 6  | 3.301007000  | -0.862229000 | 2.082114000  |
| 6  | 2.262152000  | -2.860251000 | -0.163891000 |
| 6  | -1.261161000 | 1.191359000  | 0.619698000  |
| 1  | -2.055828000 | 1.043663000  | -0.118842000 |
| 6  | -2.024013000 | -0.280867000 | 2.143095000  |
| 1  | -1.519492000 | 0.207156000  | 2.973577000  |
| 1  | -1.632068000 | -1.232471000 | 1.797556000  |
| 6  | -3.263827000 | 0.152814000  | 1.799785000  |
| 6  | -1.240157000 | 2.472312000  | 1.253130000  |
| 1  | -0.400486000 | 2.688613000  | 1.920784000  |
| 6  | -2.099615000 | 3.500604000  | 0.988456000  |
| 6  | 3.908442000  | -0.397426000 | -0.774672000 |
| 6  | 5.122102000  | -1.100079000 | -0.855410000 |
| 6  | 3.788751000  | 0.815911000  | -1.487465000 |
| 6  | 6.197417000  | -0.631801000 | -1.597844000 |
| 1  | 5.238602000  | -2.038496000 | -0.319598000 |
| 6  | 4.894935000  | 1.287177000  | -2.209164000 |
| 6  | 6.086885000  | 0.579871000  | -2.269833000 |
| 1  | 7.119181000  | -1.208986000 | -1.639299000 |
| 1  | 4.795883000  | 2.229468000  | -2.747788000 |
| 1  | 6.922593000  | 0.970733000  | -2.847651000 |
| 6  | 2.566316000  | 1.661406000  | -1.581965000 |
| 6  | 2.540643000  | 2.927632000  | -0.987479000 |
| 6  | 1.486187000  | 1.269628000  | -2.381219000 |
| 6  | 1.460133000  | 3.783651000  | -1.186672000 |
| 1  | 3.387850000  | 3.247784000  | -0.379632000 |
| 6  | 0.408951000  | 2.128890000  | -2.587586000 |
| 1  | 1.508370000  | 0.294556000  | -2.869677000 |
| 6  | 0.394445000  | 3.388511000  | -1.992202000 |
| 1  | 1.458683000  | 4.768940000  | -0.721825000 |
| 1  | -0.416436000 | 1.815660000  | -3.226067000 |
| 1  | -0.440628000 | 4.066559000  | -2.165561000 |
| 6  | 3.264934000  | -3.899248000 | 0.331721000  |
| 1  | 2.957899000  | -4.881589000 | -0.058615000 |
| 1  | 4.289312000  | -3.726010000 | -0.017933000 |
| 1  | 3.275417000  | -3.978462000 | 1.426261000  |
| 6  | 2.204976000  | -2.887488000 | -1.691534000 |
| 1  | 3.185521000  | -2.712944000 | -2.152524000 |
| 1  | 1.854697000  | -3.879309000 | -2.014610000 |
| 1  | 1.497770000  | -2.144649000 | -2.090095000 |
| 6  | 0.878577000  | -3.241479000 | 0.372243000  |
| 1  | 0.663962000  | -4.282802000 | 0.087618000  |
| 1  | 0.816253000  | -3.178293000 | 1.466764000  |
| 1  | 0.089871000  | -2.606166000 | -0.054289000 |
| 6  | 2.326387000  | -1.497839000 | 3.073026000  |
| 1  | 2.310324000  | -2.593101000 | 2.999301000  |
| 1  | 2.643330000  | -1.242588000 | 4.095600000  |
| 1  | 1.299653000  | -1.123201000 | 2.940726000  |
| 6  | 3.361839000  | 0.646615000  | 2.337795000  |
| 1  | 2.368997000  | 1.118421000  | 2.277706000  |
| 1  | 3.760301000  | 0.820533000  | 3.348913000  |
| 1  | 4.027828000  | 1.157502000  | 1.627474000  |
| 6  | 4.696785000  | -1.441028000 | 2.300708000  |
| 1  | 4.963796000  | -1.305010000 | 3.359684000  |
| 1  | 4.756049000  | -2.514242000 | 2.082630000  |
| 1  | 5.458881000  | -0.921750000 | 1.706422000  |
| 1  | -3.683317000 | 1.063611000  | 2.227939000  |

|   |              |              |              |
|---|--------------|--------------|--------------|
| 7 | -4.114197000 | -0.424818000 | 0.881243000  |
| 6 | -3.879651000 | -1.573996000 | 0.079711000  |
| 6 | -5.393475000 | 0.143035000  | 0.600838000  |
| 6 | -5.111082000 | -1.760426000 | -0.711819000 |
| 6 | -6.008521000 | -0.739650000 | -0.404361000 |
| 8 | -2.856584000 | -2.217874000 | 0.069823000  |
| 8 | -5.812890000 | 1.148395000  | 1.120970000  |
| 6 | -7.248906000 | -0.655580000 | -1.011191000 |
| 1 | -7.942683000 | 0.146341000  | -0.767120000 |
| 6 | -5.416044000 | -2.739002000 | -1.640581000 |
| 1 | -4.709880000 | -3.532654000 | -1.876099000 |
| 6 | -6.667663000 | -2.664776000 | -2.256272000 |
| 1 | -6.949295000 | -3.416556000 | -2.990558000 |
| 6 | -7.567082000 | -1.641561000 | -1.947731000 |
| 1 | -8.532806000 | -1.613599000 | -2.447985000 |
| 6 | -3.327153000 | 3.390905000  | 0.156544000  |
| 1 | -4.205205000 | 3.646236000  | 0.769663000  |
| 1 | -3.302588000 | 4.129623000  | -0.658008000 |
| 1 | -3.492960000 | 2.399561000  | -0.276889000 |
| 6 | -1.823501000 | 4.859563000  | 1.529578000  |
| 1 | -1.641302000 | 5.564311000  | 0.703387000  |
| 1 | -2.700086000 | 5.246694000  | 2.069774000  |
| 1 | -0.954443000 | 4.876871000  | 2.196995000  |

Zero-point correction= 0.684228  
 (Hartree/Particle)  
 Thermal correction to Energy= 0.725522  
 Thermal correction to Enthalpy= 0.726467  
 Thermal correction to Gibbs Free Energy= 0.608977  
 Sum of electronic and zero-point Energies= -2039.325340  
 Sum of electronic and thermal Energies= -2039.284046  
 Sum of electronic and thermal Enthalpies= -2039.283101  
 Sum of electronic and thermal Free Energies= -2039.400591

E(M06/6-311+G(2d,p))= -2040.48432812  
 E(PBE/6-311+G(2d,p))= -2039.511041  
 E(PBE-D3(BJ)/6-311+G(2d,p))= -2039.6477209

Intermediate c-VIc

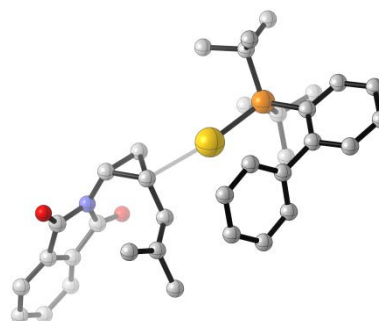

|    |              |              |              |
|----|--------------|--------------|--------------|
| 79 | 0.737804000  | -0.338877000 | -0.381201000 |
| 15 | 2.949068000  | -0.903518000 | 0.108273000  |
| 6  | 2.903560000  | -1.656119000 | 1.842241000  |
| 6  | 3.533579000  | -2.094519000 | -1.255505000 |
| 6  | -1.699351000 | -0.200254000 | -0.874723000 |
| 1  | -1.231945000 | 0.220565000  | -1.776416000 |
| 6  | -1.601033000 | -1.735328000 | -0.602227000 |
| 1  | -1.677117000 | -2.021267000 | 0.443787000  |
| 1  | -0.940107000 | -2.349069000 | -1.212405000 |
| 6  | -2.798055000 | -1.214087000 | -1.269976000 |
| 1  | -2.902974000 | -1.392221000 | -2.337750000 |
| 6  | -2.009634000 | 0.713728000  | 0.261128000  |
| 1  | -1.671065000 | 0.402830000  | 1.254919000  |
| 6  | -2.726060000 | 1.845282000  | 0.153705000  |
| 6  | 4.143484000  | 0.488658000  | 0.207409000  |
| 6  | 5.498534000  | 0.159854000  | 0.378634000  |
| 6  | 3.776259000  | 1.851545000  | 0.205001000  |
| 6  | 6.475152000  | 1.130452000  | 0.549383000  |
| 1  | 5.803893000  | -0.882993000 | 0.388320000  |
| 6  | 4.775080000  | 2.815586000  | 0.404182000  |
| 6  | 6.108113000  | 2.470710000  | 0.571831000  |



|   |              |              |              |
|---|--------------|--------------|--------------|
| 1 | 7.515418000  | 0.835592000  | 0.671995000  |
| 1 | 4.483746000  | 3.865567000  | 0.406864000  |
| 1 | 6.857503000  | 3.247374000  | 0.713304000  |
| 6 | 2.408288000  | 2.399007000  | -0.002563000 |
| 6 | 1.766663000  | 3.061001000  | 1.048614000  |
| 6 | 1.810674000  | 2.401455000  | -1.270264000 |
| 6 | 0.555755000  | 3.715151000  | 0.841086000  |
| 1 | 2.236339000  | 3.079180000  | 2.032547000  |
| 6 | 0.602554000  | 3.064491000  | -1.479596000 |
| 1 | 2.318097000  | 1.911514000  | -2.102934000 |
| 6 | -0.022820000 | 3.725578000  | -0.424783000 |
| 1 | 0.071108000  | 4.232192000  | 1.668264000  |
| 1 | 0.154642000  | 3.073152000  | -2.473413000 |
| 1 | -0.958605000 | 4.257677000  | -0.592393000 |
| 6 | 4.643998000  | -3.062288000 | -0.847224000 |
| 1 | 4.906192000  | -3.666732000 | -1.728540000 |
| 1 | 5.563903000  | -2.562980000 | -0.522628000 |
| 1 | 4.326112000  | -3.758544000 | -0.060722000 |
| 6 | 4.002862000  | -1.228238000 | -2.424824000 |
| 1 | 4.929924000  | -0.685379000 | -2.201981000 |
| 1 | 4.194398000  | -1.880974000 | -3.289131000 |
| 1 | 3.239208000  | -0.495673000 | -2.727001000 |
| 6 | 2.331377000  | -2.922561000 | -1.721102000 |
| 1 | 2.672469000  | -3.625357000 | -2.495693000 |
| 1 | 1.880109000  | -3.514273000 | -0.913670000 |
| 1 | 1.549910000  | -2.289480000 | -2.165570000 |
| 6 | 2.014690000  | -2.897233000 | 1.811702000  |
| 1 | 2.463938000  | -3.718912000 | 1.238681000  |
| 1 | 1.870883000  | -3.254763000 | 2.841881000  |
| 1 | 1.020255000  | -2.681643000 | 1.391905000  |
| 6 | 2.266780000  | -0.596526000 | 2.744435000  |
| 1 | 1.251306000  | -0.324381000 | 2.417004000  |
| 1 | 2.195400000  | -0.999362000 | 3.765709000  |
| 1 | 2.872821000  | 0.319358000  | 2.792379000  |
| 6 | 4.273951000  | -2.014387000 | 2.412165000  |
| 1 | 4.125242000  | -2.462649000 | 3.405812000  |
| 1 | 4.814053000  | -2.744647000 | 1.798952000  |
| 1 | 4.909184000  | -1.129906000 | 2.545116000  |
| 7 | -4.067708000 | -1.097040000 | -0.636455000 |
| 6 | -5.132803000 | -0.483512000 | -1.329585000 |
| 6 | -4.397960000 | -1.327247000 | 0.710764000  |
| 6 | -6.232654000 | -0.348795000 | -0.352378000 |
| 6 | -5.791288000 | -0.847395000 | 0.868887000  |
| 8 | -5.092805000 | -0.149321000 | -2.492405000 |
| 8 | -3.676492000 | -1.815839000 | 1.553758000  |
| 6 | -7.500097000 | 0.180960000  | -0.507273000 |
| 1 | -7.835713000 | 0.570199000  | -1.466638000 |
| 6 | -6.601018000 | -0.841415000 | 1.989482000  |
| 1 | -6.247494000 | -1.232818000 | 2.941522000  |
| 6 | -8.326308000 | 0.194549000  | 0.619633000  |
| 1 | -9.331557000 | 0.604144000  | 0.542719000  |
| 6 | -7.884330000 | -0.307371000 | 1.845462000  |
| 1 | -8.553192000 | -0.281445000 | 2.703481000  |
| 6 | -3.041572000 | 2.675523000  | 1.356600000  |
| 1 | -2.769430000 | 3.729911000  | 1.196132000  |
| 1 | -4.125211000 | 2.666934000  | 1.553724000  |
| 1 | -2.526269000 | 2.316877000  | 2.256401000  |
| 6 | -3.291153000 | 2.352932000  | -1.134197000 |
| 1 | -2.887240000 | 3.350910000  | -1.363525000 |
| 1 | -3.091736000 | 1.699402000  | -1.990694000 |
| 1 | -4.381951000 | 2.481613000  | -1.051912000 |

Zero-point correction= 0.688112  
(Hartree/Particle)  
Thermal correction to Energy= 0.729191  
Thermal correction to Enthalpy= 0.730135  
Thermal correction to Gibbs Free Energy= 0.614912  
Sum of electronic and zero-point Energies= -2039.362131  
Sum of electronic and thermal Energies= -2039.321052  
Sum of electronic and thermal Enthalpies= -2039.320108  
Sum of electronic and thermal Free Energies= -2039.435330

E(M06/6-311+G(2d,p))= -2040.52451993

### Intermediate t-VIIc

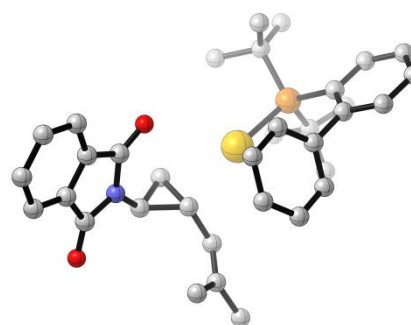

|    |              |              |              |
|----|--------------|--------------|--------------|
| 79 | -0.608535000 | 0.154623000  | -0.645383000 |
| 15 | -2.835874000 | -0.512419000 | -0.607190000 |
| 6  | -3.796918000 | 0.858723000  | -1.486545000 |
| 6  | -2.926797000 | -2.211462000 | -1.449248000 |
| 6  | 1.656689000  | 1.260401000  | -0.705332000 |
| 1  | 1.614717000  | 0.745576000  | 0.266715000  |
| 6  | 1.591470000  | 0.390572000  | -2.020867000 |
| 1  | 1.222394000  | 0.912176000  | -2.903081000 |
| 1  | 1.395145000  | -0.679560000 | -1.980302000 |
| 6  | 2.885688000  | 0.847571000  | -1.473948000 |
| 6  | 1.239493000  | 2.690192000  | -0.760525000 |
| 1  | 0.378073000  | 2.936622000  | -1.389505000 |
| 6  | 1.866181000  | 3.673641000  | -0.096673000 |
| 6  | -3.579517000 | -0.645752000 | 1.066925000  |
| 6  | -4.903845000 | -1.106650000 | 1.156629000  |
| 6  | -2.931040000 | -0.228052000 | 2.249268000  |
| 6  | -5.590729000 | -1.139604000 | 2.361925000  |
| 1  | -5.425023000 | -1.441933000 | 0.263757000  |
| 6  | -3.650421000 | -0.247594000 | 3.452617000  |
| 6  | -4.962612000 | -0.693072000 | 3.518280000  |
| 1  | -6.615366000 | -1.504716000 | 2.390273000  |
| 1  | -3.145945000 | 0.085380000  | 4.359374000  |
| 1  | -5.488065000 | -0.698176000 | 4.471466000  |
| 6  | -1.518433000 | 0.228179000  | 2.370410000  |
| 6  | -1.244706000 | 1.570787000  | 2.652454000  |
| 6  | -0.464265000 | -0.694441000 | 2.374222000  |
| 6  | 0.056548000  | 1.987338000  | 2.920811000  |
| 1  | -2.065956000 | 2.288337000  | 2.675042000  |
| 6  | 0.834998000  | -0.278981000 | 2.657866000  |
| 1  | -0.673676000 | -1.748348000 | 2.184424000  |
| 6  | 1.099105000  | 1.062566000  | 2.927719000  |
| 1  | 0.253227000  | 3.036231000  | 3.141162000  |
| 1  | 1.640912000  | -1.011112000 | 2.682394000  |
| 1  | 2.114173000  | 1.383274000  | 3.159782000  |
| 6  | -4.284644000 | -2.559312000 | -2.056206000 |
| 1  | -4.212002000 | -3.567019000 | -2.491817000 |
| 1  | -5.096211000 | -2.588717000 | -1.320265000 |
| 1  | -4.566307000 | -1.874457000 | -2.866283000 |
| 6  | -2.547372000 | -3.247168000 | -0.391233000 |
| 1  | -3.305702000 | -3.340986000 | 0.396475000  |
| 1  | -2.447797000 | -4.227326000 | -0.880591000 |
| 1  | -1.580737000 | -3.018335000 | 0.083157000  |
| 6  | -1.879221000 | -2.258632000 | -2.566043000 |
| 1  | -1.943176000 | -3.240069000 | -3.058870000 |
| 1  | -2.038180000 | -1.491250000 | -3.334795000 |
| 1  | -0.858698000 | -2.146809000 | -2.171522000 |
| 6  | -3.297910000 | 0.951038000  | -2.927412000 |
| 1  | -3.585142000 | 0.078094000  | -3.528593000 |
| 1  | -3.746718000 | 1.838004000  | -3.398918000 |
| 1  | -2.204025000 | 1.064131000  | -2.978770000 |
| 6  | -3.452592000 | 2.153698000  | -0.746963000 |
| 1  | -2.374457000 | 2.371798000  | -0.773232000 |
| 1  | -3.979357000 | 2.988181000  | -1.233312000 |
| 1  | -3.773034000 | 2.126247000  | 0.304213000  |
| 6  | -5.314771000 | 0.687363000  | -1.474718000 |
| 1  | -5.757491000 | 1.526025000  | -2.032171000 |
| 1  | -5.646502000 | -0.239352000 | -1.957301000 |
| 1  | -5.724649000 | 0.719479000  | -0.457578000 |
| 1  | 3.400234000  | 1.655500000  | -1.992238000 |

|                                              |             |              |              |
|----------------------------------------------|-------------|--------------|--------------|
| 7                                            | 3.825706000 | -0.062564000 | -0.894158000 |
| 6                                            | 3.568871000 | -1.314056000 | -0.320396000 |
| 6                                            | 5.182979000 | 0.297520000  | -0.767444000 |
| 6                                            | 4.875796000 | -1.809508000 | 0.170589000  |
| 6                                            | 5.841907000 | -0.843452000 | -0.095764000 |
| 8                                            | 2.481565000 | -1.851494000 | -0.243262000 |
| 8                                            | 5.654723000 | 1.345194000  | -1.147441000 |
| 6                                            | 7.165927000 | -1.022714000 | 0.257006000  |
| 1                                            | 7.914596000 | -0.261347000 | 0.046729000  |
| 6                                            | 5.192016000 | -2.995882000 | 0.805120000  |
| 1                                            | 4.431439000 | -3.746963000 | 1.010015000  |
| 6                                            | 6.528752000 | -3.188846000 | 1.165446000  |
| 1                                            | 6.820796000 | -4.109540000 | 1.666722000  |
| 6                                            | 7.497640000 | -2.220035000 | 0.897228000  |
| 1                                            | 8.529085000 | -2.403044000 | 1.191836000  |
| 6                                            | 3.072417000 | 3.442450000  | 0.758180000  |
| 1                                            | 3.298639000 | 2.379896000  | 0.911866000  |
| 1                                            | 3.959220000 | 3.911528000  | 0.304288000  |
| 1                                            | 2.948099000 | 3.915517000  | 1.743906000  |
| 6                                            | 1.395311000 | 5.090063000  | -0.171662000 |
| 1                                            | 1.074792000 | 5.444841000  | 0.819986000  |
| 1                                            | 2.209419000 | 5.758175000  | -0.490309000 |
| 1                                            | 0.555448000 | 5.212142000  | -0.866617000 |
| Zero-point correction=                       |             |              | 0.688574     |
| (Hartree/Particle)                           |             |              |              |
| Thermal correction to Energy=                |             |              | 0.729282     |
| Thermal correction to Enthalpy=              |             |              | 0.730226     |
| Thermal correction to Gibbs Free Energy=     |             |              | 0.616433     |
| Sum of electronic and zero-point Energies=   |             |              | -2039.366147 |
| Sum of electronic and thermal Energies=      |             |              | -2039.325440 |
| Sum of electronic and thermal Enthalpies=    |             |              | -2039.324496 |
| Sum of electronic and thermal Free Energies= |             |              | -2039.438289 |

E(M06/6-311+G(2d,p))= -2040.52784353

#### Intermediate c-VIIIc

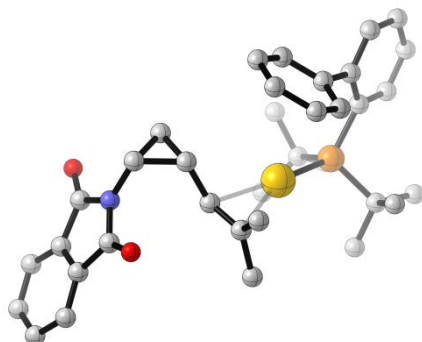

|    |              |              |              |
|----|--------------|--------------|--------------|
| 79 | 0.542585000  | -0.046473000 | 0.563580000  |
| 15 | 2.554401000  | -1.167797000 | -0.006156000 |
| 6  | 3.139552000  | -1.993538000 | 1.589341000  |
| 6  | 2.075172000  | -2.379480000 | -1.397806000 |
| 6  | -1.861946000 | 1.705109000  | -0.321010000 |
| 1  | -1.398204000 | 2.639237000  | -0.002473000 |
| 6  | -1.966531000 | 1.465837000  | -1.799133000 |
| 1  | -1.921059000 | 0.428039000  | -2.131129000 |
| 1  | -1.529363000 | 2.186954000  | -2.486073000 |
| 6  | -1.691960000 | 0.535494000  | 0.566527000  |
| 1  | -2.094895000 | -0.406168000 | 0.173860000  |
| 6  | -1.374596000 | 0.553023000  | 1.908530000  |
| 6  | 3.960947000  | -0.174622000 | -0.651433000 |
| 6  | 5.113180000  | -0.862633000 | -1.069562000 |
| 6  | 3.905328000  | 1.221605000  | -0.848798000 |
| 6  | 6.175632000  | -0.213126000 | -1.681814000 |
| 1  | 5.187570000  | -1.936221000 | -0.922798000 |
| 6  | 4.981947000  | 1.857106000  | -1.483913000 |
| 6  | 6.105176000  | 1.157721000  | -1.900322000 |
| 1  | 7.051115000  | -0.781538000 | -1.989750000 |
| 1  | 4.928814000  | 2.935058000  | -1.634637000 |
| 1  | 6.924191000  | 1.683288000  | -2.387994000 |
| 6  | 2.807914000  | 2.128196000  | -0.416865000 |

|   |              |              |              |
|---|--------------|--------------|--------------|
| 6 | 2.650090000  | 2.471326000  | 0.930935000  |
| 6 | 2.031522000  | 2.785060000  | -1.377308000 |
| 6 | 1.737220000  | 3.452560000  | 1.308372000  |
| 1 | 3.273244000  | 1.986935000  | 1.682934000  |
| 6 | 1.111986000  | 3.760195000  | -0.998264000 |
| 1 | 2.167023000  | 2.538537000  | -2.431321000 |
| 6 | 0.966678000  | 4.100206000  | 0.344622000  |
| 1 | 1.639030000  | 3.722229000  | 2.359346000  |
| 1 | 0.519957000  | 4.268869000  | -1.758125000 |
| 1 | 0.260762000  | 4.875416000  | 0.640542000  |
| 6 | 2.992905000  | -3.590279000 | -1.553155000 |
| 1 | 2.624554000  | -4.193053000 | -2.396911000 |
| 1 | 4.030303000  | -3.323681000 | -1.785362000 |
| 1 | 2.984411000  | -4.236933000 | -0.665871000 |
| 6 | 2.062746000  | -1.564680000 | -2.692700000 |
| 1 | 3.066483000  | -1.249794000 | -3.004865000 |
| 1 | 1.643497000  | -2.189433000 | -3.495198000 |
| 1 | 1.427983000  | -0.667794000 | -2.610860000 |
| 6 | 0.651086000  | -2.889447000 | -1.148731000 |
| 1 | 0.390681000  | -3.590864000 | -1.955464000 |
| 1 | 0.544693000  | -3.426794000 | -0.197617000 |
| 1 | -0.085974000 | -2.072707000 | -1.169460000 |
| 6 | 2.063810000  | -2.977336000 | 2.047241000  |
| 1 | 1.999297000  | -3.857190000 | 1.393709000  |
| 1 | 2.320418000  | -3.334865000 | 3.055532000  |
| 1 | 1.070104000  | -2.507379000 | 2.101949000  |
| 6 | 3.266718000  | -0.871492000 | 2.623958000  |
| 1 | 2.308584000  | -0.356846000 | 2.799433000  |
| 1 | 3.595832000  | -1.308685000 | 3.578451000  |
| 1 | 4.014473000  | -0.121393000 | 2.328872000  |
| 6 | 4.482341000  | -2.714001000 | 1.499351000  |
| 1 | 4.677038000  | -3.192815000 | 2.470725000  |
| 1 | 4.497807000  | -3.501387000 | 0.736537000  |
| 1 | 5.309997000  | -2.020455000 | 1.307955000  |
| 7 | -4.228814000 | 0.928869000  | -0.832006000 |
| 6 | -4.818122000 | 0.142426000  | -1.839424000 |
| 6 | -4.900370000 | 0.790267000  | 0.394760000  |
| 6 | -5.914712000 | -0.601190000 | -1.174039000 |
| 6 | -5.962488000 | -0.215956000 | 0.162497000  |
| 8 | -4.472949000 | 0.108041000  | -2.998893000 |
| 8 | -4.631315000 | 1.394815000  | 1.410025000  |
| 6 | -6.802111000 | -1.524404000 | -1.695154000 |
| 1 | -6.761447000 | -1.815278000 | -2.743204000 |
| 6 | -6.897439000 | -0.740257000 | 1.035968000  |
| 1 | -6.929124000 | -0.431526000 | 2.079200000  |
| 6 | -7.751481000 | -2.060721000 | -0.821252000 |
| 1 | -8.470069000 | -2.789290000 | -1.191798000 |
| 6 | -7.797342000 | -1.676827000 | 0.520628000  |
| 1 | -8.549875000 | -2.113325000 | 1.174489000  |
| 6 | -3.184518000 | 1.879944000  | -1.044772000 |
| 1 | -3.529250000 | 2.907545000  | -1.159189000 |
| 6 | -1.588628000 | -0.671588000 | 2.746718000  |
| 1 | -0.759422000 | -0.837778000 | 3.448681000  |
| 1 | -2.494549000 | -0.519909000 | 3.355550000  |
| 1 | -1.733064000 | -1.575814000 | 2.142029000  |
| 6 | -1.083203000 | 1.799286000  | 2.681363000  |
| 1 | -0.232430000 | 1.646584000  | 3.361088000  |
| 1 | -0.876048000 | 2.669797000  | 2.050633000  |
| 1 | -1.956550000 | 2.031080000  | 3.310956000  |

|                                              |  |  |              |
|----------------------------------------------|--|--|--------------|
| Zero-point correction=                       |  |  | 0.688122     |
| (Hartree/Particle)                           |  |  |              |
| Thermal correction to Energy=                |  |  | 0.729053     |
| Thermal correction to Enthalpy=              |  |  | 0.729997     |
| Thermal correction to Gibbs Free Energy=     |  |  | 0.614444     |
| Sum of electronic and zero-point Energies=   |  |  | -2039.393452 |
| Sum of electronic and thermal Energies=      |  |  | -2039.352522 |
| Sum of electronic and thermal Enthalpies=    |  |  | -2039.351577 |
| Sum of electronic and thermal Free Energies= |  |  | -2039.467131 |

E(M06/6-311+G(2d,p))= -2040.55666388

**Intermediate *t*-VIIIc**

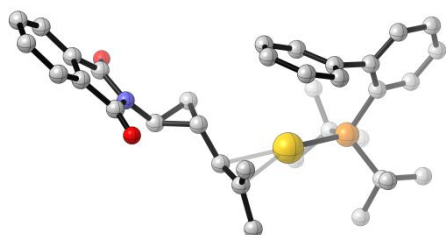

|    |              |              |              |
|----|--------------|--------------|--------------|
| 79 | -0.964609000 | -0.829404000 | -0.356989000 |
| 15 | -3.124010000 | -0.309707000 | 0.474011000  |
| 6  | -4.313709000 | -1.183709000 | -0.711689000 |
| 6  | -3.175909000 | -0.953707000 | 2.259911000  |
| 6  | 2.083991000  | -0.763399000 | 0.122111000  |
| 1  | 2.286689000  | 0.124401000  | -0.475789000 |
| 6  | 2.150990000  | -0.575899000 | 1.609711000  |
| 1  | 1.496391000  | -1.183900000 | 2.234911000  |
| 1  | 2.348389000  | 0.427901000  | 1.982011000  |
| 6  | 3.260291000  | -1.288997000 | 0.909011000  |
| 1  | 3.327593000  | -2.370497000 | 1.036011000  |
| 6  | 1.155692000  | -1.755400000 | -0.455789000 |
| 1  | 0.969293000  | -2.633901000 | 0.175011000  |
| 6  | -3.661713000 | 1.448392000  | 0.483411000  |
| 6  | -4.925713000 | 1.750391000  | 1.018911000  |
| 6  | -2.914614000 | 2.492894000  | -0.099589000 |
| 6  | -5.458115000 | 3.030590000  | 0.968611000  |
| 1  | -5.521312000 | 0.968290000  | 1.481811000  |
| 6  | -3.481316000 | 3.773793000  | -0.166889000 |
| 6  | -4.736617000 | 4.048291000  | 0.355911000  |
| 1  | -6.438615000 | 3.224488000  | 1.399311000  |
| 1  | -2.900817000 | 4.571394000  | -0.629789000 |
| 1  | -5.144418000 | 5.055490000  | 0.292811000  |
| 6  | -1.527514000 | 2.395496000  | -0.630289000 |
| 6  | -1.292714000 | 2.499896000  | -2.004989000 |
| 6  | -0.436414000 | 2.385297000  | 0.246611000  |
| 6  | 0.006986000  | 2.600498000  | -2.494389000 |
| 1  | -2.141514000 | 2.526795000  | -2.689589000 |
| 6  | 0.862186000  | 2.501099000  | -0.243389000 |
| 1  | -0.613614000 | 2.325697000  | 1.321911000  |
| 6  | 1.086586000  | 2.613199000  | -1.613889000 |
| 1  | 0.175885000  | 2.686798000  | -3.566889000 |
| 1  | 1.701586000  | 2.516800000  | 0.451511000  |
| 1  | 2.101785000  | 2.713701000  | -1.995889000 |
| 6  | -4.570209000 | -1.255509000 | 2.805111000  |
| 1  | -4.462008000 | -1.618909000 | 3.838011000  |
| 1  | -5.224010000 | -0.376810000 | 2.847011000  |
| 1  | -5.075408000 | -2.045610000 | 2.234411000  |
| 6  | -2.495011000 | 0.111594000  | 3.120211000  |
| 1  | -3.070812000 | 1.044793000  | 3.168711000  |
| 1  | -2.393610000 | -0.275206000 | 4.144911000  |
| 1  | -1.483011000 | 0.347796000  | 2.756411000  |
| 6  | -2.348407000 | -2.240906000 | 2.343611000  |
| 1  | -2.364407000 | -2.596506000 | 3.384811000  |
| 1  | -2.747606000 | -3.045006000 | 1.713611000  |
| 1  | -1.297107000 | -2.075904000 | 2.065411000  |
| 6  | -4.052107000 | -2.687308000 | -0.648989000 |
| 1  | -4.405606000 | -3.128309000 | 0.292711000  |
| 1  | -4.602206000 | -3.176109000 | -1.466889000 |
| 1  | -2.986106000 | -2.932207000 | -0.771789000 |
| 6  | -3.959510000 | -0.658508000 | -2.106389000 |
| 1  | -2.917609000 | -0.883806000 | -2.384489000 |
| 1  | -4.620109000 | -1.136409000 | -2.845189000 |
| 1  | -4.106411000 | 0.428492000  | -2.185889000 |
| 6  | -5.797509000 | -0.921711000 | -0.464989000 |
| 1  | -6.373608000 | -1.527512000 | -1.180289000 |
| 1  | -6.124609000 | -1.206811000 | 0.542311000  |
| 1  | -6.068011000 | 0.126989000  | -0.638089000 |
| 7  | 4.508890000  | -0.624695000 | 0.729211000  |

|   |              |              |              |
|---|--------------|--------------|--------------|
| 6 | 5.146390000  | -0.501395000 | -0.516889000 |
| 6 | 5.311290000  | -0.143994000 | 1.778111000  |
| 6 | 6.439689000  | 0.167907000  | -0.240689000 |
| 6 | 6.537389000  | 0.382508000  | 1.131611000  |
| 8 | 4.691791000  | -0.881395000 | -1.573489000 |
| 8 | 5.022690000  | -0.178095000 | 2.953111000  |
| 6 | 7.448789000  | 0.546809000  | -1.106689000 |
| 1 | 7.366989000  | 0.373309000  | -2.178189000 |
| 6 | 7.647588000  | 0.983109000  | 1.695411000  |
| 1 | 7.716288000  | 1.143809000  | 2.769711000  |
| 6 | 8.575488000  | 1.155711000  | -0.547389000 |
| 1 | 9.393987000  | 1.466712000  | -1.193789000 |
| 6 | 8.673287000  | 1.370211000  | 0.829011000  |
| 1 | 9.566087000  | 1.844312000  | 1.232211000  |
| 6 | 0.739392000  | -1.833501000 | -1.769289000 |
| 6 | 1.129991000  | -0.857900000 | -2.834089000 |
| 1 | 1.586489000  | 0.060400000  | -2.451389000 |
| 1 | 1.852891000  | -1.343399000 | -3.507589000 |
| 1 | 0.258590000  | -0.584102000 | -3.447289000 |
| 6 | 0.060894000  | -3.073002000 | -2.275089000 |
| 1 | -0.810506000 | -2.832403000 | -2.899889000 |
| 1 | 0.764995000  | -3.624201000 | -2.917789000 |
| 1 | -0.253505000 | -3.740603000 | -1.463689000 |

Zero-point correction= 0.688852  
 (Hartree/Particle)  
 Thermal correction to Energy= 0.729363  
 Thermal correction to Enthalpy= 0.730307  
 Thermal correction to Gibbs Free Energy= 0.616866  
 Sum of electronic and zero-point Energies= -2039.393047  
 Sum of electronic and thermal Energies= -2039.352536  
 Sum of electronic and thermal Enthalpies= -2039.351592  
 Sum of electronic and thermal Free Energies= -2039.465033

E(M06/6-311+G(2d,p))= -2040.55725589

**Intermediate *c*-IXc**

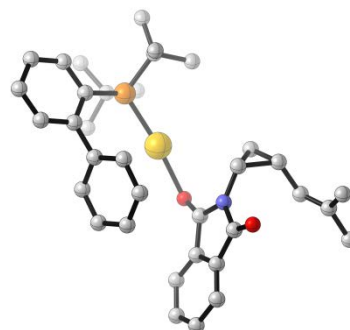

|    |              |              |              |
|----|--------------|--------------|--------------|
| 79 | -0.629512000 | 0.299242000  | -0.678714000 |
| 15 | -2.851112000 | 0.761448000  | -0.195741000 |
| 6  | -3.739069000 | 0.725325000  | -1.867486000 |
| 6  | -2.976258000 | 2.407512000  | 0.741820000  |
| 6  | 2.284300000  | 1.455454000  | 0.747724000  |
| 1  | 1.669537000  | 1.388865000  | 1.647644000  |
| 6  | 1.982230000  | 2.534308000  | -0.245121000 |
| 1  | 2.150603000  | 2.311790000  | -1.298766000 |
| 1  | 1.124629000  | 3.172774000  | -0.046744000 |
| 6  | -3.671456000 | -0.529854000 | 0.824492000  |
| 6  | -5.018164000 | -0.323326000 | 1.170974000  |
| 6  | -3.052987000 | -1.735080000 | 1.221779000  |
| 6  | -5.751994000 | -1.274567000 | 1.865417000  |
| 1  | -5.517520000 | 0.601658000  | 0.893290000  |
| 6  | -3.817847000 | -2.691600000 | 1.904630000  |
| 6  | -5.150247000 | -2.474811000 | 2.223981000  |
| 1  | -6.791691000 | -1.075808000 | 2.117896000  |
| 1  | -3.333447000 | -3.621732000 | 2.200871000  |
| 1  | -5.711804000 | -3.238354000 | 2.759147000  |
| 6  | -1.623012000 | -2.107148000 | 1.025560000  |
| 6  | -1.269605000 | -3.083270000 | 0.087388000  |
| 6  | -0.641758000 | -1.618344000 | 1.897025000  |
| 6  | 0.039225000  | -3.554235000 | 0.015889000  |

|   |              |              |              |
|---|--------------|--------------|--------------|
| 1 | -2.033504000 | -3.484643000 | -0.579624000 |
| 6 | 0.663669000  | -2.101608000 | 1.835682000  |
| 1 | -0.916916000 | -0.880835000 | 2.652424000  |
| 6 | 1.006241000  | -3.072444000 | 0.895974000  |
| 1 | 0.300526000  | -4.316929000 | -0.716744000 |
| 1 | 1.406198000  | -1.734520000 | 2.544483000  |
| 1 | 2.022110000  | -3.465481000 | 0.857206000  |
| 6 | -4.315405000 | 3.130230000  | 0.611662000  |
| 1 | -4.267986000 | 4.046899000  | 1.218476000  |
| 1 | -5.164940000 | 2.545867000  | 0.983524000  |
| 1 | -4.523744000 | 3.436788000  | -0.421564000 |
| 6 | -2.688454000 | 2.100263000  | 2.211789000  |
| 1 | -3.488442000 | 1.518654000  | 2.686712000  |
| 1 | -2.594788000 | 3.051490000  | 2.756155000  |
| 1 | -1.740432000 | 1.555255000  | 2.338189000  |
| 6 | -1.875392000 | 3.334918000  | 0.224629000  |
| 1 | -1.947812000 | 4.296005000  | 0.754871000  |
| 1 | -1.954158000 | 3.541055000  | -0.850784000 |
| 1 | -0.881476000 | 2.912125000  | 0.423096000  |
| 6 | -3.173883000 | 1.844205000  | -2.740865000 |
| 1 | -3.450978000 | 2.840031000  | -2.370644000 |
| 1 | -3.590146000 | 1.743941000  | -3.754219000 |
| 1 | -2.078203000 | 1.794147000  | -2.825226000 |
| 6 | -3.404048000 | -0.631207000 | -2.492176000 |
| 1 | -2.324065000 | -0.763517000 | -2.651781000 |
| 1 | -3.902002000 | -0.700847000 | -3.470738000 |
| 1 | -3.767206000 | -1.466004000 | -1.876237000 |
| 6 | -5.259495000 | 0.850181000  | -1.796662000 |
| 1 | -5.646538000 | 0.861969000  | -2.826146000 |
| 1 | -5.595909000 | 1.772099000  | -1.310155000 |
| 1 | -5.720614000 | -0.004197000 | -1.286817000 |
| 6 | 3.201962000  | 2.663427000  | 0.611529000  |
| 1 | 3.135406000  | 3.351169000  | 1.454091000  |
| 6 | 4.525777000  | 2.527618000  | -0.038955000 |
| 1 | 4.504584000  | 2.269192000  | -1.102893000 |
| 6 | 5.721120000  | 2.711649000  | 0.539675000  |
| 7 | 2.794739000  | 0.200383000  | 0.284628000  |
| 6 | 3.896546000  | -0.451919000 | 0.915256000  |
| 6 | 2.354535000  | -0.523663000 | -0.792123000 |
| 6 | 4.206552000  | -1.619784000 | 0.062193000  |
| 8 | 4.393374000  | -0.095954000 | 1.953589000  |
| 6 | 3.283818000  | -1.648892000 | -0.981147000 |
| 8 | 1.349938000  | -0.288796000 | -1.476238000 |
| 6 | 5.162104000  | -2.606704000 | 0.208203000  |
| 6 | 3.276998000  | -2.660605000 | -1.923583000 |
| 1 | 5.871777000  | -2.587354000 | 1.032940000  |
| 6 | 5.174628000  | -3.628851000 | -0.746854000 |
| 1 | 2.541451000  | -2.684155000 | -2.725713000 |
| 6 | 4.251302000  | -3.653960000 | -1.793856000 |
| 1 | 5.915873000  | -4.421815000 | -0.670895000 |
| 1 | 4.289087000  | -4.465972000 | -2.517154000 |
| 6 | 6.985778000  | 2.591088000  | -0.252537000 |
| 1 | 7.639437000  | 1.809668000  | 0.164802000  |
| 1 | 7.564909000  | 3.526658000  | -0.215465000 |
| 1 | 6.794033000  | 2.351666000  | -1.306052000 |
| 6 | 5.916315000  | 3.031048000  | 1.987581000  |
| 1 | 4.981938000  | 3.067917000  | 2.557758000  |
| 1 | 6.435638000  | 3.993796000  | 2.110844000  |
| 1 | 6.560882000  | 2.272020000  | 2.456296000  |

Zero-point correction= 0.687317  
(Hartree/Particle)  
Thermal correction to Energy= 0.728545  
Thermal correction to Enthalpy= 0.729489  
Thermal correction to Gibbs Free Energy= 0.612916  
Sum of electronic and zero-point Energies= -2039.380959  
Sum of electronic and thermal Energies= -2039.339731  
Sum of electronic and thermal Enthalpies= -2039.338786  
Sum of electronic and thermal Free Energies= -2039.455360

E(M06/6-311+G(2d,p))= -2040.54007102

### Transition state TS<sub>c-(tXc-Xc)</sub>

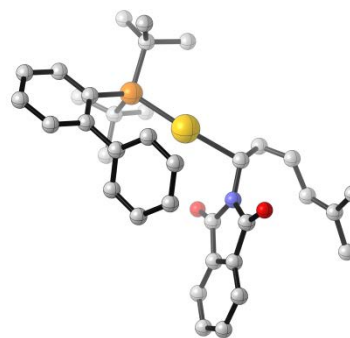

|    |              |              |              |
|----|--------------|--------------|--------------|
| 79 | -0.500525000 | 0.788632000  | 0.189179000  |
| 15 | -2.801333000 | 0.560331000  | -0.292435000 |
| 6  | -2.920512000 | 0.444540000  | -2.177640000 |
| 6  | -3.690582000 | 2.080398000  | 0.435990000  |
| 6  | 1.674499000  | 1.291087000  | 0.406471000  |
| 1  | 1.654607000  | 1.310729000  | 1.500366000  |
| 6  | 1.694557000  | 2.643613000  | -0.400958000 |
| 1  | 1.797295000  | 2.458605000  | -1.471501000 |
| 1  | 0.850951000  | 3.288173000  | -0.156510000 |
| 6  | -3.641936000 | -0.956829000 | 0.325791000  |
| 6  | -5.036003000 | -1.037473000 | 0.178235000  |
| 6  | -2.957543000 | -2.077033000 | 0.848672000  |
| 6  | -5.749488000 | -2.178491000 | 0.517816000  |
| 1  | -5.584421000 | -0.189744000 | -0.223198000 |
| 6  | -3.692545000 | -3.229368000 | 1.162007000  |
| 6  | -5.069642000 | -3.288739000 | 1.004204000  |
| 1  | -6.830283000 | -2.198400000 | 0.392501000  |
| 1  | -3.155617000 | -4.090828000 | 1.558909000  |
| 1  | -5.609414000 | -4.197141000 | 1.265913000  |
| 6  | -1.498008000 | -2.162655000 | 1.129134000  |
| 6  | -0.687301000 | -3.013575000 | 0.371496000  |
| 6  | -0.941892000 | -1.505987000 | 2.234167000  |
| 6  | 0.653206000  | -3.197021000 | 0.703436000  |
| 1  | -1.118522000 | -3.544970000 | -0.477534000 |
| 6  | 0.395517000  | -1.698392000 | 2.572879000  |
| 1  | -1.574593000 | -0.863399000 | 2.847544000  |
| 6  | 1.195469000  | -2.545345000 | 1.808297000  |
| 1  | 1.269977000  | -3.869525000 | 0.107710000  |
| 1  | 0.813594000  | -1.190660000 | 3.441740000  |
| 1  | 2.236926000  | -2.707325000 | 2.083459000  |
| 6  | -4.968859000 | 2.517421000  | -0.278189000 |
| 1  | -5.393815000 | 3.366698000  | 0.278173000  |
| 1  | -5.744688000 | 1.744005000  | -0.315010000 |
| 1  | -4.776300000 | 2.867100000  | -1.300626000 |
| 6  | -3.996274000 | 1.762312000  | 1.900141000  |
| 1  | -4.779857000 | 1.003239000  | 2.015170000  |
| 1  | -4.347155000 | 2.681399000  | 2.392636000  |
| 1  | -3.102081000 | 1.420925000  | 2.443089000  |
| 6  | -2.712674000 | 3.261321000  | 0.401726000  |
| 1  | -3.224413000 | 4.150116000  | 0.800778000  |
| 1  | -2.372728000 | 3.503272000  | -0.614048000 |
| 1  | -1.827930000 | 3.074570000  | 1.026903000  |
| 6  | -2.301127000 | 1.706620000  | -2.777082000 |
| 1  | -2.891742000 | 2.606379000  | -2.559174000 |
| 1  | -2.259186000 | 1.596268000  | -3.870856000 |
| 1  | -1.272531000 | 1.869843000  | -2.418756000 |
| 6  | -2.077265000 | -0.768470000 | -2.576935000 |
| 1  | -1.035233000 | -0.684018000 | -2.234517000 |
| 1  | -2.065974000 | -0.843718000 | -3.674761000 |
| 1  | -2.501210000 | -1.705020000 | -2.187878000 |
| 6  | -4.331429000 | 0.249318000  | -2.726869000 |
| 1  | -4.266937000 | 0.191843000  | -3.823905000 |
| 1  | -5.007430000 | 1.076127000  | -2.481334000 |
| 1  | -4.782549000 | -0.688822000 | -2.380109000 |
| 6  | 2.886174000  | 2.774529000  | 0.377106000  |
| 1  | 2.797932000  | 3.237844000  | 1.358344000  |
| 6  | 4.174260000  | 2.388744000  | -0.122383000 |
| 1  | 4.226615000  | 2.147497000  | -1.188004000 |
| 6  | 5.301041000  | 2.262982000  | 0.620568000  |

|   |             |              |              |
|---|-------------|--------------|--------------|
| 7 | 2.449828000 | 0.204442000  | -0.084137000 |
| 6 | 3.408887000 | -0.468047000 | 0.700458000  |
| 6 | 2.389564000 | -0.315830000 | -1.384205000 |
| 6 | 4.024406000 | -1.474317000 | -0.193117000 |
| 8 | 3.619688000 | -0.249101000 | 1.873627000  |
| 6 | 3.422609000 | -1.375670000 | -1.445387000 |
| 8 | 1.630180000 | 0.058707000  | -2.254373000 |
| 6 | 5.009641000 | -2.407852000 | 0.068059000  |
| 6 | 3.787714000 | -2.201856000 | -2.491560000 |
| 1 | 5.468778000 | -2.483749000 | 1.052519000  |
| 6 | 5.389774000 | -3.245759000 | -0.984962000 |
| 1 | 3.312230000 | -2.120257000 | -3.467273000 |
| 6 | 4.790123000 | -3.144198000 | -2.241304000 |
| 1 | 6.165054000 | -3.992418000 | -0.824673000 |
| 1 | 5.108655000 | -3.812177000 | -3.039094000 |
| 6 | 6.567406000 | 1.798548000  | -0.012230000 |
| 1 | 6.896574000 | 0.861800000  | 0.465206000  |
| 1 | 7.378221000 | 2.524243000  | 0.148156000  |
| 1 | 6.460089000 | 1.621945000  | -1.088733000 |
| 6 | 5.379385000 | 2.500094000  | 2.088148000  |
| 1 | 4.465367000 | 2.912595000  | 2.525745000  |
| 1 | 6.216083000 | 3.173365000  | 2.321913000  |
| 1 | 5.592500000 | 1.547005000  | 2.595147000  |

Zero-point correction= 0.685975  
(Hartree/Particle)  
Thermal correction to Energy= 0.726934  
Thermal correction to Enthalpy= 0.727879  
Thermal correction to Gibbs Free Energy= 0.612907  
Sum of electronic and zero-point Energies= -2039.360210  
Sum of electronic and thermal Energies= -2039.319251  
Sum of electronic and thermal Enthalpies= -2039.318307  
Sum of electronic and thermal Free Energies= -2039.433278

E(M06/6-311+G(2d,p))= -2040.51880997

#### Intermediate c-Xc

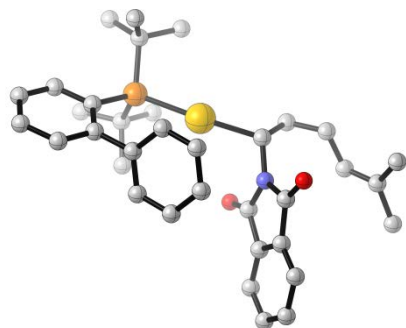

|    |              |              |              |
|----|--------------|--------------|--------------|
| 79 | -0.519257000 | 0.803145000  | 0.211855000  |
| 15 | -2.843152000 | 0.590877000  | -0.284452000 |
| 6  | -2.985154000 | 0.567233000  | -2.174637000 |
| 6  | -3.734180000 | 2.064966000  | 0.528812000  |
| 6  | 1.574905000  | 1.213552000  | 0.545088000  |
| 1  | 1.726882000  | 1.224048000  | 1.631913000  |
| 6  | 1.881346000  | 2.643947000  | -0.074196000 |
| 1  | 1.835648000  | 2.599281000  | -1.166856000 |
| 1  | 1.146095000  | 3.349696000  | 0.319702000  |
| 6  | -3.699856000 | -0.953411000 | 0.252225000  |
| 6  | -5.090147000 | -1.040346000 | 0.072793000  |
| 6  | -3.018172000 | -2.093137000 | 0.734914000  |
| 6  | -5.799104000 | -2.204377000 | 0.336289000  |
| 1  | -5.641744000 | -0.179101000 | -0.293567000 |
| 6  | -3.746577000 | -3.269239000 | 0.966910000  |
| 6  | -5.118464000 | -3.334397000 | 0.773369000  |
| 1  | -6.877090000 | -2.226446000 | 0.188103000  |
| 1  | -3.208985000 | -4.144964000 | 1.330324000  |
| 1  | -5.653341000 | -4.261400000 | 0.972818000  |
| 6  | -1.568684000 | -2.174219000 | 1.060754000  |
| 6  | -0.729546000 | -3.010028000 | 0.317098000  |
| 6  | -1.051345000 | -1.530291000 | 2.191164000  |
| 6  | 0.599592000  | -3.194088000 | 0.690457000  |

|   |              |              |              |
|---|--------------|--------------|--------------|
| 1 | -1.131083000 | -3.528340000 | -0.554520000 |
| 6 | 0.275233000  | -1.722290000 | 2.570711000  |
| 1 | -1.705125000 | -0.895586000 | 2.791244000  |
| 6 | 1.103271000  | -2.555237000 | 1.820964000  |
| 1 | 1.236636000  | -3.857406000 | 0.106048000  |
| 1 | 0.662014000  | -1.223350000 | 3.459075000  |
| 1 | 2.137364000  | -2.714790000 | 2.125273000  |
| 6 | -5.044401000 | 2.505113000  | -0.119782000 |
| 1 | -5.452034000 | 3.341736000  | 0.467967000  |
| 1 | -5.813252000 | 1.724305000  | -0.133116000 |
| 1 | -4.897481000 | 2.872162000  | -1.143652000 |
| 6 | -3.978695000 | 1.676530000  | 1.987754000  |
| 1 | -4.743578000 | 0.896994000  | 2.094597000  |
| 1 | -4.325782000 | 2.564416000  | 2.537280000  |
| 1 | -3.057709000 | 1.324643000  | 2.477258000  |
| 6 | -2.780111000 | 3.265078000  | 0.510605000  |
| 1 | -3.285276000 | 4.120782000  | 0.983940000  |
| 1 | -2.497829000 | 3.568070000  | -0.506171000 |
| 1 | -1.859778000 | 3.063175000  | 1.076761000  |
| 6 | -2.376461000 | 1.858629000  | -2.719008000 |
| 1 | -2.983634000 | 2.740964000  | -2.473692000 |
| 1 | -2.321613000 | 1.790941000  | -3.816001000 |
| 1 | -1.354773000 | 2.021223000  | -2.341960000 |
| 6 | -2.135836000 | -0.620485000 | -2.635606000 |
| 1 | -1.081659000 | -0.520968000 | -2.338172000 |
| 1 | -2.170059000 | -0.674282000 | -3.734381000 |
| 1 | -2.520211000 | -1.574494000 | -2.246466000 |
| 6 | -4.395689000 | 0.392482000  | -2.732038000 |
| 1 | -4.334977000 | 0.406804000  | -3.830822000 |
| 1 | -5.080685000 | 1.194499000  | -2.431914000 |
| 1 | -4.836236000 | -0.570280000 | -2.444689000 |
| 6 | 3.209258000  | 2.806238000  | 0.473278000  |
| 1 | 3.280514000  | 3.152108000  | 1.506254000  |
| 6 | 4.347072000  | 2.351663000  | -0.191857000 |
| 1 | 4.247921000  | 2.101978000  | -1.251320000 |
| 6 | 5.569372000  | 2.131104000  | 0.410622000  |
| 7 | 2.412760000  | 0.169682000  | 0.023226000  |
| 6 | 3.396267000  | -0.492309000 | 0.777426000  |
| 6 | 2.372226000  | -0.307693000 | -1.293938000 |
| 6 | 4.019333000  | -1.478786000 | -0.135190000 |
| 8 | 3.650303000  | -0.266143000 | 1.943165000  |
| 6 | 3.417956000  | -1.355167000 | -1.385041000 |
| 8 | 1.620217000  | 0.088608000  | -2.160739000 |
| 6 | 5.016377000  | -2.405679000 | 0.103562000  |
| 6 | 3.794799000  | -2.149517000 | -2.451525000 |
| 1 | 5.474930000  | -2.501692000 | 1.086620000  |
| 6 | 5.405891000  | -3.214125000 | -0.969228000 |
| 1 | 3.320122000  | -2.048728000 | -3.425927000 |
| 6 | 4.806783000  | -3.087659000 | -2.223387000 |
| 1 | 6.187541000  | -3.957626000 | -0.825592000 |
| 1 | 5.132370000  | -3.732838000 | -3.037035000 |
| 6 | 6.694940000  | 1.599192000  | -0.387508000 |
| 1 | 7.139871000  | 0.728946000  | 0.118322000  |
| 1 | 7.496356000  | 2.353543000  | -0.431868000 |
| 1 | 6.407229000  | 1.326789000  | -1.408258000 |
| 6 | 5.823113000  | 2.305474000  | 1.858129000  |
| 1 | 5.173220000  | 3.038831000  | 2.343615000  |
| 1 | 6.872316000  | 2.563706000  | 2.044243000  |
| 1 | 5.640141000  | 1.331218000  | 2.342961000  |

Zero-point correction= 0.686547  
(Hartree/Particle)  
Thermal correction to Energy= 0.727867  
Thermal correction to Enthalpy= 0.728812  
Thermal correction to Gibbs Free Energy= 0.612774  
Sum of electronic and zero-point Energies= -2039.362838  
Sum of electronic and thermal Energies= -2039.321518  
Sum of electronic and thermal Enthalpies= -2039.320573  
Sum of electronic and thermal Free Energies= -2039.436611

E(M06/6-311+G(2d,p))= -2040.52185458



Transition state TS<sub>c-Xc+Xe</sub>

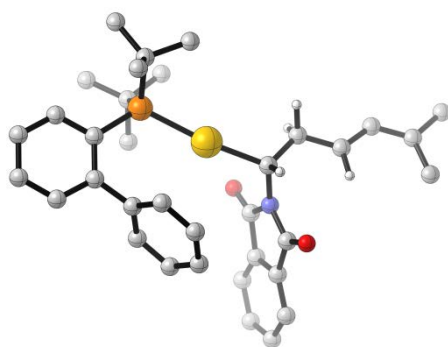

|    |              |              |              |
|----|--------------|--------------|--------------|
| 79 | -0.325792000 | 0.688938000  | 0.241015000  |
| 15 | -2.668193000 | 0.928228000  | -0.255177000 |
| 6  | -2.803810000 | 1.033803000  | -2.143562000 |
| 6  | -3.288891000 | 2.496542000  | 0.631884000  |
| 6  | 1.771740000  | 0.712044000  | 0.577405000  |
| 1  | 1.950961000  | 0.656357000  | 1.659874000  |
| 6  | 2.447647000  | 1.968922000  | 0.043877000  |
| 1  | 2.329375000  | 2.076882000  | -1.048458000 |
| 1  | 1.944115000  | 2.869077000  | 0.447711000  |
| 6  | -3.816765000 | -0.445567000 | 0.199250000  |
| 6  | -5.195503000 | -0.262266000 | 0.001947000  |
| 6  | -3.372572000 | -1.707022000 | 0.653230000  |
| 6  | -6.116871000 | -1.276984000 | 0.222129000  |
| 1  | -5.567202000 | 0.698235000  | -0.344834000 |
| 6  | -4.314668000 | -2.728685000 | 0.845494000  |
| 6  | -5.671023000 | -2.526425000 | 0.636883000  |
| 1  | -7.176969000 | -1.090191000 | 0.060188000  |
| 1  | -3.957696000 | -3.699395000 | 1.189536000  |
| 1  | -6.376307000 | -3.338581000 | 0.804198000  |
| 6  | -1.968861000 | -2.075753000 | 0.985723000  |
| 6  | -1.286658000 | -3.014691000 | 0.204545000  |
| 6  | -1.364655000 | -1.605536000 | 2.156913000  |
| 6  | -0.026113000 | -3.470863000 | 0.583206000  |
| 1  | -1.758803000 | -3.401372000 | -0.699450000 |
| 6  | -0.109374000 | -2.069685000 | 2.542204000  |
| 1  | -1.899787000 | -0.890539000 | 2.783222000  |
| 6  | 0.561409000  | -3.004720000 | 1.756963000  |
| 1  | 0.490658000  | -4.208813000 | -0.030354000 |
| 1  | 0.342801000  | -1.701923000 | 3.462927000  |
| 1  | 1.535173000  | -3.380207000 | 2.070400000  |
| 6  | -4.484502000 | 3.214522000  | 0.008755000  |
| 1  | -4.737953000 | 4.075985000  | 0.646002000  |
| 1  | -5.386555000 | 2.595133000  | -0.056812000 |
| 1  | -4.259056000 | 3.610130000  | -0.990213000 |
| 6  | -3.629092000 | 2.081507000  | 2.064239000  |
| 1  | -4.523607000 | 1.447683000  | 2.116581000  |
| 1  | -3.824797000 | 2.986503000  | 2.658920000  |
| 1  | -2.798232000 | 1.544176000  | 2.545933000  |
| 6  | -2.129176000 | 3.498074000  | 0.690881000  |
| 1  | -2.471872000 | 4.398370000  | 1.224075000  |
| 1  | -1.790914000 | 3.812754000  | -0.305179000 |
| 1  | -1.261562000 | 3.093642000  | 1.231604000  |
| 6  | -1.977475000 | 2.227322000  | -2.620825000 |
| 1  | -2.427277000 | 3.186558000  | -2.331269000 |
| 1  | -1.924794000 | 2.206866000  | -3.720039000 |
| 1  | -0.945950000 | 2.194812000  | -2.237096000 |
| 6  | -2.166396000 | -0.255879000 | -2.668018000 |
| 1  | -1.123776000 | -0.368347000 | -2.337328000 |
| 1  | -2.172413000 | -0.232902000 | -3.768587000 |
| 1  | -2.729033000 | -1.146920000 | -2.354399000 |
| 6  | -4.214742000 | 1.131972000  | -2.714335000 |
| 1  | -4.139333000 | 1.190249000  | -3.810973000 |
| 1  | -4.756254000 | 2.022258000  | -2.375942000 |
| 1  | -4.817646000 | 0.246385000  | -2.478655000 |
| 6  | 3.877836000  | 2.105188000  | 0.382550000  |
| 1  | 4.295178000  | 1.361689000  | 1.068813000  |
| 6  | 4.676523000  | 3.116816000  | -0.089710000 |
| 1  | 4.244299000  | 3.847564000  | -0.776084000 |
| 6  | 6.025297000  | 3.261543000  | 0.247525000  |

|   |             |              |              |
|---|-------------|--------------|--------------|
| 7 | 2.438415000 | -0.474797000 | 0.036883000  |
| 6 | 3.223327000 | -1.343358000 | 0.802369000  |
| 6 | 2.246813000 | -0.970859000 | -1.255187000 |
| 6 | 3.550920000 | -2.494231000 | -0.075731000 |
| 8 | 3.555768000 | -1.158919000 | 1.957152000  |
| 6 | 2.970317000 | -2.264860000 | -1.318947000 |
| 8 | 1.604366000 | -0.425551000 | -2.131312000 |
| 6 | 4.262519000 | -3.647918000 | 0.192540000  |
| 6 | 3.078834000 | -3.179647000 | -2.349157000 |
| 1 | 4.709140000 | -3.819964000 | 1.170732000  |
| 6 | 4.376864000 | -4.582654000 | -0.841613000 |
| 1 | 2.617790000 | -2.996930000 | -3.318409000 |
| 6 | 3.794593000 | -4.352956000 | -2.089249000 |
| 1 | 4.924956000 | -5.507487000 | -0.671305000 |
| 1 | 3.899564000 | -5.102526000 | -2.871505000 |
| 6 | 6.778034000 | 4.401839000  | -0.301701000 |
| 1 | 7.802892000 | 4.111757000  | -0.568122000 |
| 1 | 6.882757000 | 5.146388000  | 0.506611000  |
| 1 | 6.278107000 | 4.885998000  | -1.145608000 |
| 6 | 6.781455000 | 2.350408000  | 1.125189000  |
| 1 | 7.440244000 | 1.741661000  | 0.484477000  |
| 1 | 6.175104000 | 1.677059000  | 1.734858000  |
| 1 | 7.453267000 | 2.932058000  | 1.770515000  |

Zero-point correction= 0.685638  
 (Hartree/Particle)  
 Thermal correction to Energy= 0.726631  
 Thermal correction to Enthalpy= 0.727575  
 Thermal correction to Gibbs Free Energy= 0.610940  
 Sum of electronic and zero-point Energies= -2039.353205  
 Sum of electronic and thermal Energies= -2039.312212  
 Sum of electronic and thermal Enthalpies= -2039.311267  
 Sum of electronic and thermal Free Energies= -2039.427902

E(M06/6-311+G(2d,p))= -2040.51200344

Intermediate t-Xc

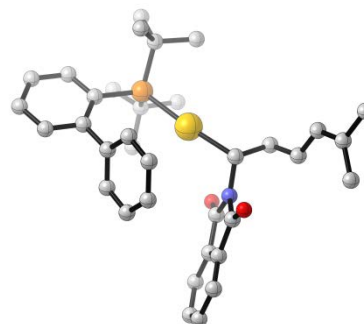

|    |              |              |              |
|----|--------------|--------------|--------------|
| 79 | -0.285904000 | 0.705652000  | -0.143962000 |
| 15 | -2.667730000 | 0.687869000  | -0.315059000 |
| 6  | -3.058243000 | 0.233610000  | -2.113266000 |
| 6  | -3.289705000 | 2.415726000  | 0.184906000  |
| 6  | 1.862314000  | 0.889560000  | -0.157824000 |
| 1  | 2.143638000  | 1.146163000  | 0.872379000  |
| 6  | 2.273506000  | 2.031401000  | -1.163541000 |
| 1  | 2.283068000  | 1.617678000  | -2.176179000 |
| 1  | 1.579241000  | 2.876297000  | -1.104570000 |
| 6  | -3.603725000 | -0.556751000 | 0.672718000  |
| 6  | -5.007356000 | -0.512151000 | 0.638006000  |
| 6  | -2.985250000 | -1.618648000 | 1.369093000  |
| 6  | -5.792143000 | -1.482198000 | 1.246072000  |
| 1  | -5.508814000 | 0.297612000  | 0.113825000  |
| 6  | -3.794562000 | -2.605652000 | 1.950832000  |
| 6  | -5.179363000 | -2.547491000 | 1.895511000  |
| 1  | -6.876965000 | -1.407675000 | 1.200624000  |
| 1  | -3.307824000 | -3.426723000 | 2.476911000  |
| 1  | -5.775773000 | -3.326403000 | 2.367334000  |
| 6  | -1.522789000 | -1.791159000 | 1.586955000  |
| 6  | -0.852048000 | -2.882117000 | 1.023703000  |
| 6  | -0.830295000 | -0.956363000 | 2.471980000  |
| 6  | 0.482223000  | -3.133051000 | 1.336361000  |

|   |              |              |              |
|---|--------------|--------------|--------------|
| 1 | -1.390390000 | -3.545576000 | 0.345562000  |
| 6 | 0.501187000  | -1.211351000 | 2.791139000  |
| 1 | -1.352123000 | -0.118848000 | 2.936671000  |
| 6 | 1.159113000  | -2.302178000 | 2.226520000  |
| 1 | 0.990591000  | -3.990368000 | 0.894368000  |
| 1 | 1.024536000  | -0.558766000 | 3.489456000  |
| 1 | 2.196647000  | -2.508999000 | 2.487912000  |
| 6 | -4.609927000 | 2.859053000  | -0.439177000 |
| 1 | -4.853603000 | 3.859662000  | -0.050195000 |
| 1 | -5.454855000 | 2.207244000  | -0.189853000 |
| 1 | -4.541782000 | 2.944315000  | -1.531226000 |
| 6 | -3.406822000 | 2.418452000  | 1.709032000  |
| 1 | -4.230972000 | 1.789186000  | 2.068326000  |
| 1 | -3.598465000 | 3.447469000  | 2.048322000  |
| 1 | -2.477604000 | 2.079427000  | 2.191130000  |
| 6 | -2.219390000 | 3.437347000  | -0.214899000 |
| 1 | -2.569731000 | 4.441670000  | 0.068235000  |
| 1 | -2.025886000 | 3.445531000  | -1.295548000 |
| 1 | -1.265651000 | 3.255401000  | 0.300812000  |
| 6 | -2.392484000 | 1.260567000  | -3.028665000 |
| 1 | -2.874262000 | 2.246084000  | -2.966664000 |
| 1 | -2.479805000 | 0.915745000  | -4.070127000 |
| 1 | -1.320581000 | 1.379601000  | -2.806502000 |
| 6 | -2.409069000 | -1.134677000 | -2.337043000 |
| 1 | -1.321760000 | -1.109140000 | -2.175241000 |
| 1 | -2.588685000 | -1.446724000 | -3.377013000 |
| 1 | -2.838999000 | -1.905242000 | -1.680633000 |
| 6 | -4.539388000 | 0.123991000  | -2.469392000 |
| 1 | -4.615898000 | -0.113597000 | -3.541354000 |
| 1 | -5.097761000 | 1.052759000  | -2.300342000 |
| 1 | -5.036085000 | -0.687787000 | -1.923563000 |
| 6 | 3.576596000  | 2.326841000  | -0.607377000 |
| 1 | 4.354095000  | 1.575570000  | -0.758384000 |
| 6 | 3.846579000  | 3.435042000  | 0.190385000  |
| 1 | 3.072004000  | 4.199516000  | 0.280795000  |
| 6 | 5.051666000  | 3.651719000  | 0.828367000  |
| 7 | 2.508763000  | -0.360280000 | -0.458690000 |
| 6 | 3.448775000  | -0.975319000 | 0.383816000  |
| 6 | 2.175083000  | -1.188338000 | -1.541028000 |
| 6 | 3.701987000  | -2.315907000 | -0.192738000 |
| 8 | 3.929938000  | -0.465663000 | 1.374748000  |
| 6 | 2.948539000  | -2.438371000 | -1.356805000 |
| 8 | 1.394781000  | -0.902043000 | -2.425784000 |
| 6 | 4.492536000  | -3.348873000 | 0.273655000  |
| 6 | 2.957022000  | -3.600018000 | -2.106079000 |
| 1 | 5.071199000  | -3.245993000 | 1.190186000  |
| 6 | 4.505948000  | -4.530073000 | -0.474540000 |
| 1 | 2.362951000  | -3.690284000 | -3.013616000 |
| 6 | 3.752498000  | -4.652884000 | -1.643383000 |
| 1 | 5.111614000  | -5.370628000 | -0.141359000 |
| 1 | 3.783418000  | -5.586666000 | -2.201395000 |
| 6 | 5.273868000  | 4.916316000  | 1.564465000  |
| 1 | 6.225179000  | 5.373714000  | 1.254919000  |
| 1 | 5.386780000  | 4.695919000  | 2.637562000  |
| 1 | 4.460593000  | 5.637081000  | 1.434731000  |
| 6 | 6.191108000  | 2.703361000  | 0.819307000  |
| 1 | 6.945498000  | 3.059355000  | 0.100370000  |
| 1 | 5.923838000  | 1.675533000  | 0.559225000  |
| 1 | 6.684694000  | 2.703467000  | 1.799740000  |

Zero-point correction= 0.686460  
(Hartree/Particle)  
Thermal correction to Energy= 0.728113  
Thermal correction to Enthalpy= 0.729058  
Thermal correction to Gibbs Free Energy= 0.612042  
Sum of electronic and zero-point Energies= -2039.360906  
Sum of electronic and thermal Energies= -2039.319252  
Sum of electronic and thermal Enthalpies= -2039.318308  
Sum of electronic and thermal Free Energies= -2039.435323

E(M06/6-311+G(2d,p))= -2040.51994525

### Transition state TS<sub>r-(IXc-Xc)</sub>

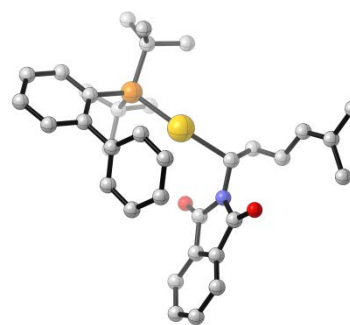

|    |              |              |              |
|----|--------------|--------------|--------------|
| 79 | 0.296536000  | -0.694018000 | -0.185200000 |
| 15 | 2.653506000  | -0.551930000 | -0.315315000 |
| 6  | 3.029853000  | -0.034223000 | -2.097371000 |
| 6  | 3.358637000  | -2.256259000 | 0.156877000  |
| 6  | -1.894622000 | -1.021573000 | -0.317574000 |
| 1  | -2.001053000 | -1.335032000 | 0.725246000  |
| 6  | -1.977830000 | -2.102274000 | -1.459480000 |
| 1  | -2.052741000 | -1.610115000 | -2.428520000 |
| 1  | -1.176546000 | -2.843319000 | -1.420641000 |
| 6  | 3.480292000  | 0.724329000  | 0.723930000  |
| 6  | 4.884398000  | 0.764789000  | 0.715908000  |
| 6  | 2.783341000  | 1.731374000  | 1.428280000  |
| 6  | 5.596466000  | 1.768877000  | 1.357046000  |
| 1  | 5.443206000  | -0.002195000 | 0.185677000  |
| 6  | 3.520243000  | 2.754319000  | 2.042565000  |
| 6  | 4.906994000  | 2.782140000  | 2.012280000  |
| 1  | 6.684419000  | 1.761414000  | 1.332469000  |
| 1  | 2.975120000  | 3.532553000  | 2.576227000  |
| 1  | 5.445079000  | 3.587144000  | 2.509628000  |
| 6  | 1.310001000  | 1.806104000  | 1.625449000  |
| 6  | 0.584947000  | 2.885275000  | 1.108686000  |
| 6  | 0.651528000  | 0.885288000  | 2.450460000  |
| 6  | -0.767971000 | 3.039438000  | 1.404752000  |
| 1  | 1.093885000  | 3.620334000  | 0.484063000  |
| 6  | -0.699547000 | 1.041828000  | 2.751330000  |
| 1  | 1.215077000  | 0.059989000  | 2.886651000  |
| 6  | -1.411719000 | 2.120069000  | 2.230204000  |
| 1  | -1.315193000 | 3.894039000  | 1.006932000  |
| 1  | -1.194202000 | 0.324382000  | 3.405597000  |
| 1  | -2.464011000 | 2.251349000  | 2.480961000  |
| 6  | 4.718536000  | -2.600630000 | -0.446641000 |
| 1  | 5.017077000  | -3.592808000 | -0.074981000 |
| 1  | 5.513799000  | -1.902457000 | -0.160599000 |
| 1  | 4.682993000  | -2.662861000 | -1.541715000 |
| 6  | 3.444530000  | -2.292714000 | 1.682651000  |
| 1  | 4.211873000  | -1.615575000 | 2.078250000  |
| 1  | 3.704943000  | -3.314525000 | 1.996575000  |
| 1  | 2.483539000  | -2.038793000 | 2.153863000  |
| 6  | 2.359444000  | -3.328647000 | -0.291156000 |
| 1  | 2.761861000  | -4.316081000 | -0.019083000 |
| 1  | 2.191792000  | -3.327454000 | -1.376143000 |
| 1  | 1.386066000  | -3.213614000 | 0.207287000  |
| 6  | 2.451678000  | -1.088287000 | -3.041019000 |
| 1  | 3.006539000  | -2.035119000 | -2.994986000 |
| 1  | 2.522621000  | -0.714552000 | -4.073577000 |
| 1  | 1.389339000  | -1.294142000 | -2.834708000 |
| 6  | 2.292585000  | 1.291620000  | -2.306015000 |
| 1  | 1.204931000  | 1.190060000  | -2.181527000 |
| 1  | 2.483272000  | 1.641516000  | -3.331826000 |
| 1  | 2.650540000  | 2.071861000  | -1.618652000 |
| 6  | 4.505565000  | 0.184387000  | -2.422952000 |
| 1  | 4.584682000  | 0.446444000  | -3.488761000 |
| 1  | 5.122369000  | -0.706233000 | -2.258329000 |
| 1  | 4.935277000  | 1.017215000  | -1.852695000 |
| 6  | -3.178003000 | -2.415444000 | -0.753074000 |
| 1  | -4.055854000 | -1.811583000 | -0.976648000 |
| 6  | -3.284616000 | -3.501964000 | 0.170991000  |
| 1  | -2.407622000 | -4.149410000 | 0.260517000  |
| 6  | -4.387024000 | -3.798628000 | 0.905218000  |

|                                              |              |              |              |
|----------------------------------------------|--------------|--------------|--------------|
| 7                                            | -2.578918000 | 0.203566000  | -0.566637000 |
| 6                                            | -3.600956000 | 0.700637000  | 0.266942000  |
| 6                                            | -2.191091000 | 1.156700000  | -1.524881000 |
| 6                                            | -3.900478000 | 2.062831000  | -0.226894000 |
| 8                                            | -4.087982000 | 0.093332000  | 1.195368000  |
| 6                                            | -3.067299000 | 2.329256000  | -1.310030000 |
| 8                                            | -1.295019000 | 1.011138000  | -2.329937000 |
| 6                                            | -4.793177000 | 3.003548000  | 0.251477000  |
| 6                                            | -3.096058000 | 3.546513000  | -1.965150000 |
| 1                                            | -5.432982000 | 2.789382000  | 1.105800000  |
| 6                                            | -4.830219000 | 4.238426000  | -0.403110000 |
| 1                                            | -2.438676000 | 3.750610000  | -2.808309000 |
| 6                                            | -3.997956000 | 4.504177000  | -1.492045000 |
| 1                                            | -5.517019000 | 5.008225000  | -0.056831000 |
| 1                                            | -4.051792000 | 5.476540000  | -1.977670000 |
| 6                                            | -4.396114000 | -4.996932000 | 1.790819000  |
| 1                                            | -3.432019000 | -5.517235000 | 1.804903000  |
| 1                                            | -5.171373000 | -5.707102000 | 1.466400000  |
| 1                                            | -4.658542000 | -4.711029000 | 2.820228000  |
| 6                                            | -5.648733000 | -3.006046000 | 0.910445000  |
| 1                                            | -5.678608000 | -2.194341000 | 0.178488000  |
| 1                                            | -5.798974000 | -2.564780000 | 1.907157000  |
| 1                                            | -6.509326000 | -3.666830000 | 0.733349000  |
| Zero-point correction=                       |              |              | 0.684585     |
| (Hartree/Particle)                           |              |              |              |
| Thermal correction to Energy=                |              |              | 0.725941     |
| Thermal correction to Enthalpy=              |              |              | 0.726885     |
| Thermal correction to Gibbs Free Energy=     |              |              | 0.609955     |
| Sum of electronic and zero-point Energies=   |              |              | -2039.359998 |
| Sum of electronic and thermal Energies=      |              |              | -2039.318642 |
| Sum of electronic and thermal Enthalpies=    |              |              | -2039.317698 |
| Sum of electronic and thermal Free Energies= |              |              | -2039.434628 |

E(M06/6-311+G(2d,p))= -2040.51688529

#### Intermediate #IXc

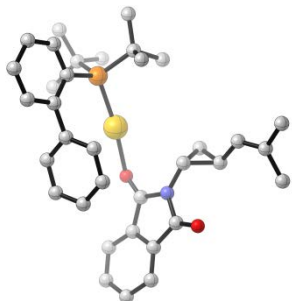

|    |              |              |              |
|----|--------------|--------------|--------------|
| 79 | -0.547022000 | 0.185055000  | 0.902226000  |
| 15 | -2.685448000 | -0.523767000 | 0.358806000  |
| 6  | -3.781559000 | -0.010533000 | 1.816567000  |
| 6  | -2.655471000 | -2.386885000 | 0.004782000  |
| 6  | 2.317858000  | -1.331264000 | 0.220364000  |
| 1  | 1.524916000  | -1.420401000 | -0.526665000 |
| 6  | 2.195804000  | -2.116137000 | 1.491580000  |
| 1  | 2.586807000  | -1.653290000 | 2.396532000  |
| 1  | 1.293712000  | -2.710848000 | 1.630735000  |
| 6  | -3.377371000 | 0.325308000  | -1.118149000 |
| 6  | -4.687005000 | -0.014949000 | -1.496816000 |
| 6  | -2.709845000 | 1.339846000  | -1.838479000 |
| 6  | -5.345256000 | 0.632501000  | -2.532808000 |
| 1  | -5.215844000 | -0.800830000 | -0.964856000 |
| 6  | -3.401811000 | 1.997943000  | -2.865308000 |
| 6  | -4.701467000 | 1.659181000  | -3.212662000 |
| 1  | -6.359321000 | 0.339471000  | -2.797313000 |
| 1  | -2.886038000 | 2.788490000  | -3.409780000 |
| 1  | -5.204484000 | 2.189611000  | -4.019184000 |
| 6  | -1.298817000 | 1.784463000  | -1.656173000 |
| 6  | -1.025717000 | 3.039314000  | -1.098580000 |
| 6  | -0.243978000 | 1.044208000  | -2.204635000 |
| 6  | 0.273452000  | 3.539027000  | -1.080965000 |

|   |              |              |              |
|---|--------------|--------------|--------------|
| 1 | -1.846935000 | 3.633426000  | -0.695563000 |
| 6 | 1.055807000  | 1.546663000  | -2.190348000 |
| 1 | -0.451244000 | 0.080351000  | -2.672333000 |
| 6 | 1.316308000  | 2.796775000  | -1.631898000 |
| 1 | 0.469200000  | 4.519943000  | -0.649495000 |
| 1 | 1.864966000  | 0.965072000  | -2.633123000 |
| 1 | 2.327913000  | 3.202263000  | -1.643508000 |
| 6 | -4.012498000 | -3.079546000 | 0.107435000  |
| 1 | -3.866171000 | -4.150409000 | -0.098105000 |
| 1 | -4.740966000 | -2.712013000 | -0.624775000 |
| 1 | -4.444844000 | -2.996063000 | 1.112718000  |
| 6 | -2.092303000 | -2.561710000 | -1.405644000 |
| 1 | -2.756122000 | -2.153653000 | -2.178694000 |
| 1 | -1.971705000 | -3.637347000 | -1.601833000 |
| 1 | -1.101691000 | -2.095948000 | -1.517363000 |
| 6 | -1.697446000 | -3.053063000 | 0.994222000  |
| 1 | -1.631245000 | -4.123731000 | 0.749961000  |
| 1 | -2.033761000 | -2.969890000 | 2.035127000  |
| 1 | -0.687425000 | -2.626387000 | 0.924325000  |
| 6 | -3.342715000 | -0.799258000 | 3.049618000  |
| 1 | -3.638016000 | -1.855657000 | 2.991282000  |
| 1 | -3.835280000 | -0.369285000 | 3.934331000  |
| 1 | -2.256307000 | -0.746183000 | 3.214274000  |
| 6 | -3.506899000 | 1.479417000  | 2.037920000  |
| 1 | -2.457652000 | 1.674579000  | 2.303962000  |
| 1 | -4.137499000 | 1.834117000  | 2.866615000  |
| 1 | -3.754922000 | 2.080301000  | 1.150779000  |
| 6 | -5.284782000 | -0.190992000 | 1.611963000  |
| 1 | -5.786557000 | 0.076512000  | 2.553802000  |
| 1 | -5.569394000 | -1.222086000 | 1.371958000  |
| 1 | -5.680754000 | 0.474010000  | 0.835127000  |
| 6 | 3.180888000  | -2.550670000 | 0.446758000  |
| 1 | 4.223633000  | -2.332131000 | 0.670373000  |
| 6 | 2.899841000  | -3.742927000 | -0.375687000 |
| 1 | 1.835255000  | -3.988469000 | -0.473282000 |
| 6 | 3.789680000  | -4.523570000 | -1.005074000 |
| 7 | 2.940202000  | -0.043277000 | 0.281147000  |
| 6 | 4.152842000  | 0.298036000  | -0.388225000 |
| 6 | 2.439181000  | 1.040080000  | 0.960316000  |
| 6 | 4.439967000  | 1.695901000  | 0.002606000  |
| 8 | 4.761346000  | -0.440103000 | -1.121368000 |
| 6 | 3.412704000  | 2.135057000  | 0.835284000  |
| 8 | 1.355888000  | 1.093534000  | 1.555537000  |
| 6 | 5.474936000  | 2.531458000  | -0.370072000 |
| 6 | 3.375510000  | 3.423776000  | 1.334043000  |
| 1 | 6.268621000  | 2.188157000  | -1.030652000 |
| 6 | 5.453127000  | 3.835852000  | 0.134491000  |
| 1 | 2.562505000  | 3.761444000  | 1.974432000  |
| 6 | 4.424591000  | 4.272745000  | 0.971447000  |
| 1 | 6.250809000  | 4.525775000  | -0.132610000 |
| 1 | 4.439202000  | 5.295289000  | 1.342496000  |
| 6 | 3.341150000  | -5.705887000 | -1.807736000 |
| 1 | 2.249779000  | -5.819236000 | -1.808766000 |
| 1 | 3.780521000  | -6.637238000 | -1.418207000 |
| 1 | 3.678142000  | -5.624330000 | -2.852602000 |
| 6 | 5.272444000  | -4.319884000 | -0.980141000 |
| 1 | 5.591505000  | -3.441329000 | -0.409171000 |
| 1 | 5.660449000  | -4.209210000 | -2.004130000 |
| 1 | 5.776510000  | -5.201848000 | -0.556113000 |

|                                              |  |  |              |
|----------------------------------------------|--|--|--------------|
| Zero-point correction=                       |  |  | 0.688642     |
| (Hartree/Particle)                           |  |  |              |
| Thermal correction to Energy=                |  |  | 0.729609     |
| Thermal correction to Enthalpy=              |  |  | 0.730553     |
| Thermal correction to Gibbs Free Energy=     |  |  | 0.615136     |
| Sum of electronic and zero-point Energies=   |  |  | -2039.381561 |
| Sum of electronic and thermal Energies=      |  |  | -2039.340593 |
| Sum of electronic and thermal Enthalpies=    |  |  | -2039.339649 |
| Sum of electronic and thermal Free Energies= |  |  | -2039.455067 |

E(M06/6-311+G(2d,p))= -2040.54238848



Product *cis*-6g

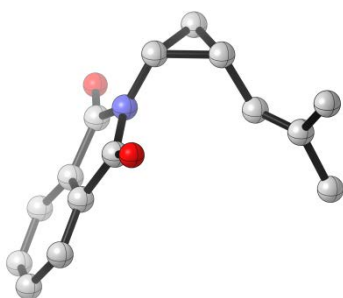

|   |              |              |              |
|---|--------------|--------------|--------------|
| 6 | -2.374532000 | 1.146679000  | -0.331592000 |
| 1 | -3.196573000 | 1.232156000  | -1.040848000 |
| 6 | -1.767376000 | 2.438696000  | 0.142622000  |
| 1 | -1.353909000 | 2.445229000  | 1.149494000  |
| 1 | -2.205856000 | 3.381767000  | -0.176547000 |
| 6 | -2.411778000 | 0.000976000  | 0.595675000  |
| 1 | -1.626481000 | -0.000529000 | 1.358932000  |
| 6 | -3.289662000 | -1.012877000 | 0.605849000  |
| 7 | 0.155520000  | 0.947660000  | -0.530921000 |
| 6 | 1.202425000  | 1.466206000  | 0.247435000  |
| 6 | 0.480158000  | -0.311382000 | -1.063454000 |
| 6 | 2.242755000  | 0.407295000  | 0.276684000  |
| 6 | 1.812694000  | -0.654452000 | -0.512366000 |
| 8 | 1.229662000  | 2.558711000  | 0.769917000  |
| 8 | -0.211313000 | -0.941892000 | -1.831616000 |
| 6 | 3.466877000  | 0.383674000  | 0.919254000  |
| 1 | 3.797464000  | 1.221026000  | 1.531398000  |
| 6 | 2.588181000  | -1.784754000 | -0.693832000 |
| 1 | 2.246282000  | -2.610139000 | -1.316035000 |
| 6 | 4.257243000  | -0.755745000 | 0.746837000  |
| 1 | 5.227578000  | -0.815740000 | 1.236190000  |
| 6 | 3.825943000  | -1.821160000 | -0.046424000 |
| 1 | 4.467036000  | -2.693069000 | -0.161476000 |
| 6 | -1.047249000 | 1.636287000  | -0.885128000 |
| 1 | -1.058210000 | 1.997325000  | -1.913497000 |
| 6 | -3.194213000 | -2.098585000 | 1.633794000  |
| 1 | -4.121347000 | -2.168495000 | 2.224188000  |
| 1 | -3.060186000 | -3.082898000 | 1.158421000  |
| 1 | -2.360357000 | -1.939926000 | 2.329085000  |
| 6 | -4.422709000 | -1.175949000 | -0.358949000 |
| 1 | -5.385624000 | -1.201580000 | 0.174534000  |
| 1 | -4.476970000 | -0.384614000 | -1.114611000 |
| 1 | -4.340827000 | -2.138137000 | -0.887611000 |

|                                              |             |
|----------------------------------------------|-------------|
| Zero-point correction=                       | 0.266974    |
| (Hartree/Particle)                           |             |
| Thermal correction to Energy=                | 0.283235    |
| Thermal correction to Enthalpy=              | 0.284179    |
| Thermal correction to Gibbs Free Energy=     | 0.222145    |
| Sum of electronic and zero-point Energies=   | -785.017675 |
| Sum of electronic and thermal Energies=      | -785.001414 |
| Sum of electronic and thermal Enthalpies=    | -785.000470 |
| Sum of electronic and thermal Free Energies= | -785.062504 |

E(M06/6-311+G(2d,p))= -785.507657060

Product *trans*-6g

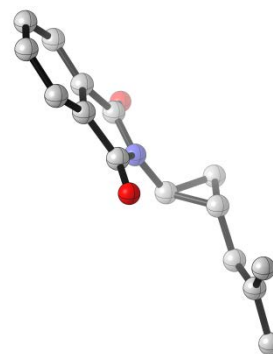

|   |              |              |              |
|---|--------------|--------------|--------------|
| 6 | 2.064392000  | 0.743305000  | 0.467712000  |
| 1 | 1.733210000  | 0.042839000  | 1.233599000  |
| 6 | 1.509877000  | 2.134037000  | 0.593260000  |
| 1 | 2.121950000  | 2.964339000  | 0.243388000  |
| 1 | 0.881246000  | 2.356123000  | 1.453006000  |
| 6 | 0.958487000  | 1.217205000  | -0.446948000 |
| 1 | 1.224702000  | 1.406458000  | -1.487775000 |
| 6 | 3.405323000  | 0.527379000  | -0.105600000 |
| 1 | 3.764942000  | 1.337579000  | -0.749963000 |
| 7 | -0.345615000 | 0.664207000  | -0.255554000 |
| 6 | -0.625924000 | -0.711142000 | -0.310610000 |
| 6 | -1.514599000 | 1.428089000  | -0.111365000 |
| 6 | -2.094283000 | -0.830731000 | -0.135946000 |
| 6 | -2.624429000 | 0.449233000  | -0.008405000 |
| 8 | 0.192579000  | -1.589332000 | -0.470958000 |
| 8 | -1.567526000 | 2.637778000  | -0.089278000 |
| 6 | -2.897663000 | -1.955622000 | -0.097973000 |
| 1 | -2.473826000 | -2.952927000 | -0.202617000 |
| 6 | -3.979747000 | 0.659173000  | 0.165433000  |
| 1 | -4.386468000 | 1.664174000  | 0.263170000  |
| 6 | -4.269634000 | -1.755358000 | 0.077249000  |
| 1 | -4.937331000 | -2.614186000 | 0.110558000  |
| 6 | -4.800953000 | -0.470557000 | 0.208245000  |
| 1 | -5.874179000 | -0.349711000 | 0.343092000  |
| 6 | 4.199751000  | -0.538605000 | 0.068463000  |
| 6 | 3.846074000  | -1.738236000 | 0.891785000  |
| 1 | 2.869335000  | -1.664881000 | 1.382044000  |
| 1 | 3.834868000  | -2.643235000 | 0.264813000  |
| 1 | 4.603763000  | -1.914768000 | 1.670919000  |
| 6 | 5.545075000  | -0.612896000 | -0.586344000 |
| 1 | 6.344294000  | -0.727469000 | 0.162689000  |
| 1 | 5.614978000  | -1.492728000 | -1.244955000 |
| 1 | 5.766923000  | 0.279722000  | -1.184934000 |

|                                              |             |
|----------------------------------------------|-------------|
| Zero-point correction=                       | 0.267869    |
| (Hartree/Particle)                           |             |
| Thermal correction to Energy=                | 0.283864    |
| Thermal correction to Enthalpy=              | 0.284808    |
| Thermal correction to Gibbs Free Energy=     | 0.224162    |
| Sum of electronic and zero-point Energies=   | -785.017893 |
| Sum of electronic and thermal Energies=      | -785.001898 |
| Sum of electronic and thermal Enthalpies=    | -785.000954 |
| Sum of electronic and thermal Free Energies= | -785.061601 |

E(M06/6-311+G(2d,p))= -785.514839058

## Optimized structures of *cis*-3g and *trans*-3g

Product *cis*-3g

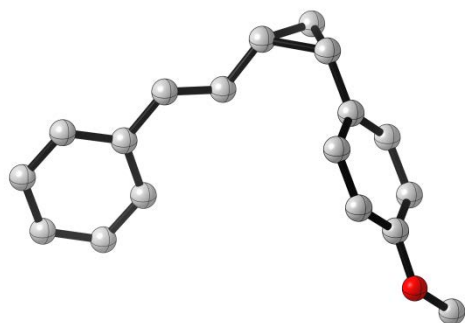

|   |              |              |              |
|---|--------------|--------------|--------------|
| 6 | -4.474508000 | 0.025991000  | 0.451959000  |
| 6 | -5.263958000 | -1.106367000 | 0.283275000  |
| 6 | -4.720849000 | -2.258657000 | -0.277730000 |
| 6 | -3.380250000 | -2.265358000 | -0.663220000 |
| 6 | -2.592640000 | -1.134969000 | -0.493811000 |
| 6 | -3.127616000 | 0.038741000  | 0.061257000  |
| 1 | -4.903067000 | 0.927348000  | 0.892639000  |
| 1 | -6.308083000 | -1.088181000 | 0.593087000  |
| 1 | -5.333861000 | -3.148903000 | -0.409508000 |
| 1 | -2.942836000 | -3.165330000 | -1.094111000 |
| 1 | -1.542765000 | -1.167763000 | -0.784471000 |
| 6 | -2.343361000 | 1.258437000  | 0.257192000  |
| 1 | -2.842275000 | 2.045370000  | 0.831986000  |
| 6 | -1.106737000 | 1.497292000  | -0.205648000 |
| 1 | -0.590221000 | 0.739736000  | -0.802878000 |
| 6 | -0.359294000 | 2.735566000  | 0.035733000  |
| 6 | 1.152653000  | 2.681954000  | 0.233546000  |
| 6 | 0.589306000  | 3.250826000  | -1.021570000 |
| 1 | -0.883494000 | 3.487470000  | 0.627438000  |
| 1 | 1.513191000  | 3.411968000  | 0.961776000  |
| 1 | 0.640200000  | 4.326225000  | -1.180718000 |
| 1 | 0.670979000  | 2.653714000  | -1.930520000 |
| 6 | 1.875439000  | 1.378956000  | 0.252194000  |
| 6 | 2.668361000  | 0.952102000  | -0.809911000 |
| 6 | 1.781049000  | 0.543392000  | 1.374876000  |
| 6 | 3.352761000  | -0.263750000 | -0.773419000 |
| 1 | 2.762570000  | 1.583241000  | -1.693980000 |
| 6 | 2.452675000  | -0.665155000 | 1.430916000  |
| 1 | 1.158618000  | 0.851280000  | 2.216369000  |
| 6 | 3.246239000  | -1.078629000 | 0.353095000  |
| 1 | 3.960932000  | -0.560930000 | -1.624524000 |
| 1 | 2.378260000  | -1.316242000 | 2.300729000  |
| 8 | 3.861790000  | -2.277188000 | 0.496753000  |
| 6 | 4.689107000  | -2.721993000 | -0.556349000 |
| 1 | 5.086330000  | -3.692738000 | -0.246851000 |
| 1 | 4.124019000  | -2.847612000 | -1.491680000 |
| 1 | 5.526907000  | -2.031398000 | -0.733122000 |

Zero-point correction= 0.309069  
 (Hartree/Particle)  
 Thermal correction to Energy= 0.325757  
 Thermal correction to Enthalpy= 0.326701  
 Thermal correction to Gibbs Free Energy= 0.263210  
 Sum of electronic and zero-point Energies= -771.038908  
 Sum of electronic and thermal Energies= -771.022219  
 Sum of electronic and thermal Enthalpies= -771.021275  
 Sum of electronic and thermal Free Energies= -771.084766

E(M06/6-311+G(2d,p))= -771.570294803

Product *trans*-3g

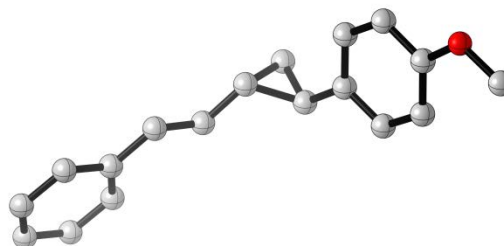

|   |              |              |              |
|---|--------------|--------------|--------------|
| 6 | 4.605818000  | -1.269829000 | -0.967522000 |
| 6 | 5.904058000  | -1.626464000 | -0.620212000 |
| 6 | 6.546480000  | -0.983338000 | 0.433859000  |
| 6 | 5.875805000  | 0.020230000  | 1.133006000  |
| 6 | 4.579263000  | 0.375114000  | 0.786105000  |
| 6 | 3.915299000  | -0.267132000 | -0.271353000 |
| 1 | 4.105894000  | -1.776282000 | -1.794392000 |
| 1 | 6.416048000  | -2.411334000 | -1.175674000 |
| 1 | 7.563940000  | -1.257602000 | 0.708298000  |
| 1 | 6.371590000  | 0.533738000  | 1.956089000  |
| 1 | 4.076979000  | 1.168886000  | 1.339126000  |
| 6 | 2.549261000  | 0.061309000  | -0.678285000 |
| 1 | 2.197519000  | -0.453522000 | -1.577967000 |
| 6 | 1.703468000  | 0.902987000  | -0.064613000 |
| 1 | 2.008541000  | 1.428494000  | 0.846665000  |
| 6 | 0.340954000  | 1.181530000  | -0.527315000 |
| 6 | -0.778884000 | 1.319446000  | 0.502171000  |
| 6 | -0.289463000 | 2.516166000  | -0.249019000 |
| 1 | 0.049083000  | 0.689262000  | -1.457653000 |
| 1 | -0.942273000 | 2.938524000  | -1.012375000 |
| 1 | 0.305699000  | 3.248962000  | 0.295383000  |
| 6 | -2.109546000 | 0.716070000  | 0.247560000  |
| 6 | -2.788132000 | 0.069849000  | 1.280399000  |
| 6 | -2.730236000 | 0.757260000  | -1.010126000 |
| 6 | -4.037793000 | -0.518790000 | 1.090292000  |
| 1 | -2.328204000 | 0.022803000  | 2.268381000  |
| 6 | -3.970517000 | 0.177476000  | -1.212732000 |
| 1 | -2.237232000 | 1.249474000  | -1.849748000 |
| 6 | -4.636624000 | -0.466285000 | -0.168202000 |
| 1 | -4.528035000 | -1.011815000 | 1.926552000  |
| 1 | -4.450753000 | 0.210901000  | -2.194177000 |
| 1 | -0.448732000 | 1.243778000  | 1.540058000  |
| 8 | -5.844867000 | -1.001431000 | -0.471997000 |
| 6 | -6.541503000 | -1.673184000 | 0.554035000  |
| 1 | -7.477580000 | -2.026642000 | 0.112195000  |
| 1 | -5.975040000 | -2.538106000 | 0.929732000  |
| 1 | -6.774766000 | -1.002547000 | 1.394183000  |

Zero-point correction= 0.309522  
 (Hartree/Particle)  
 Thermal correction to Energy= 0.326255  
 Thermal correction to Enthalpy= 0.327199  
 Thermal correction to Gibbs Free Energy= 0.263501  
 Sum of electronic and zero-point Energies= -771.040432  
 Sum of electronic and thermal Energies= -771.023699  
 Sum of electronic and thermal Enthalpies= -771.022755  
 Sum of electronic and thermal Free Energies= -771.086454

E(M06/6-311+G(2d,p))= -771.572360519

## Reduced density gradient surface

The Reduced density gradient surface was generated for the cyclopropanation transition states using Multiwfn.<sup>21</sup> The isosurface was visualized using ChemCraft, with the surface contour set at 0.5 and the color range fixed from -0.035 to 0.02.

TS<sub>c</sub>(VIIb-VIIIb)

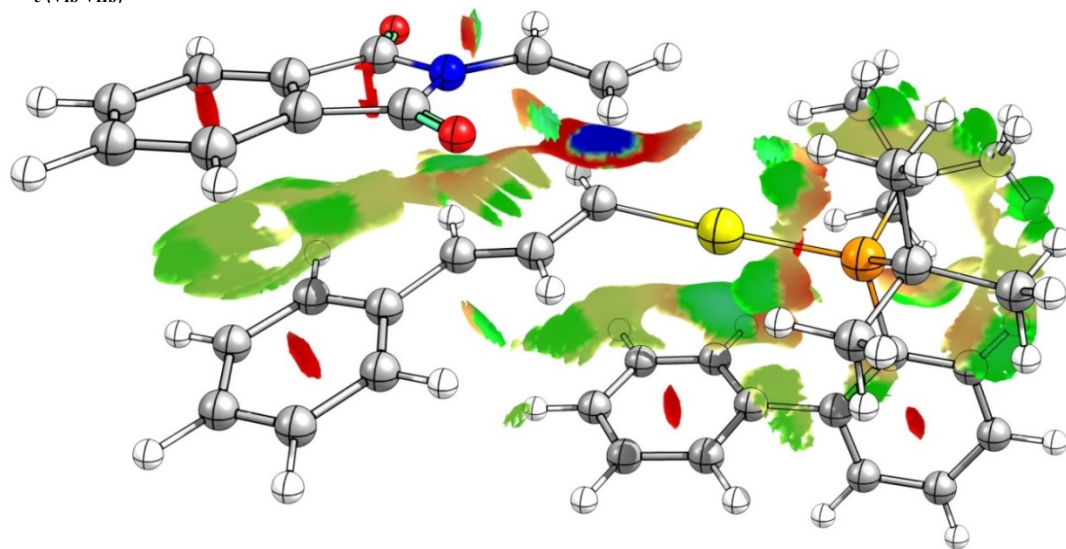

Color range: -0.035  .02

TS<sub>c</sub>(VIIb-VIIIb)

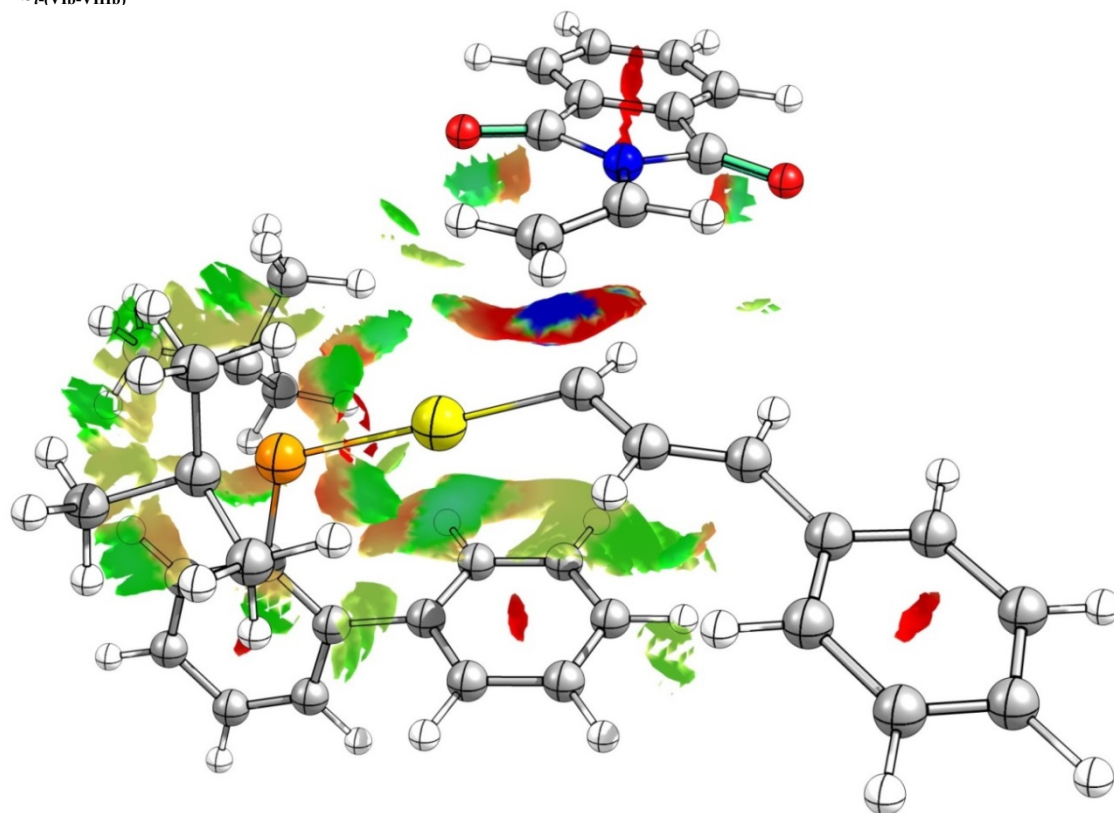

Color range: -0.035  .02

TS<sub>c</sub>(VIc-VIIc)

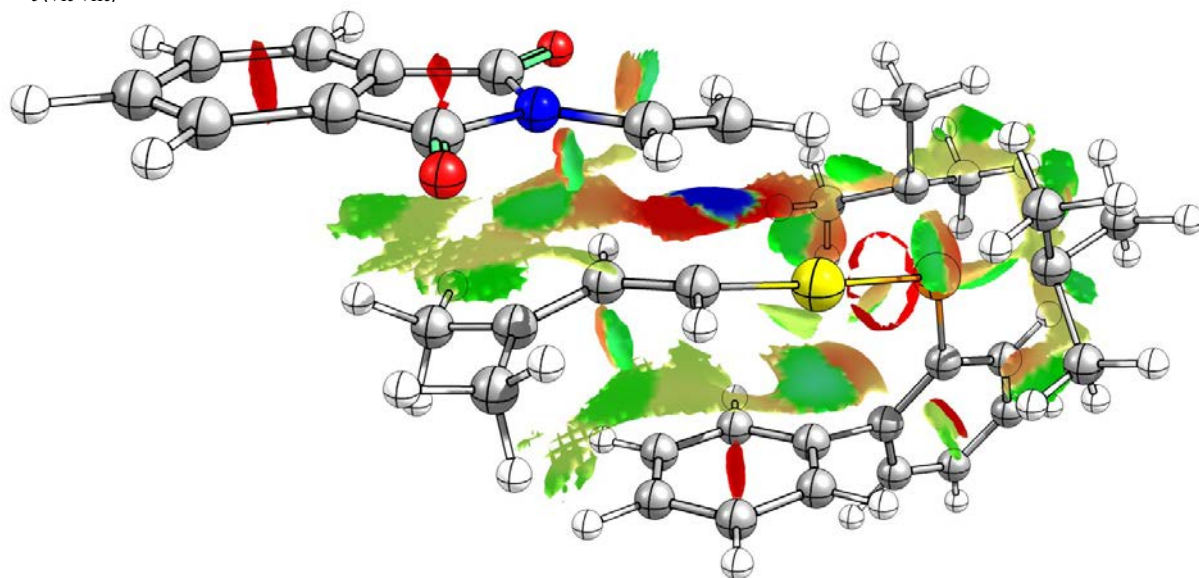

Color range: -0.035  .02

TS<sub>t</sub>(VIc-VIIc)

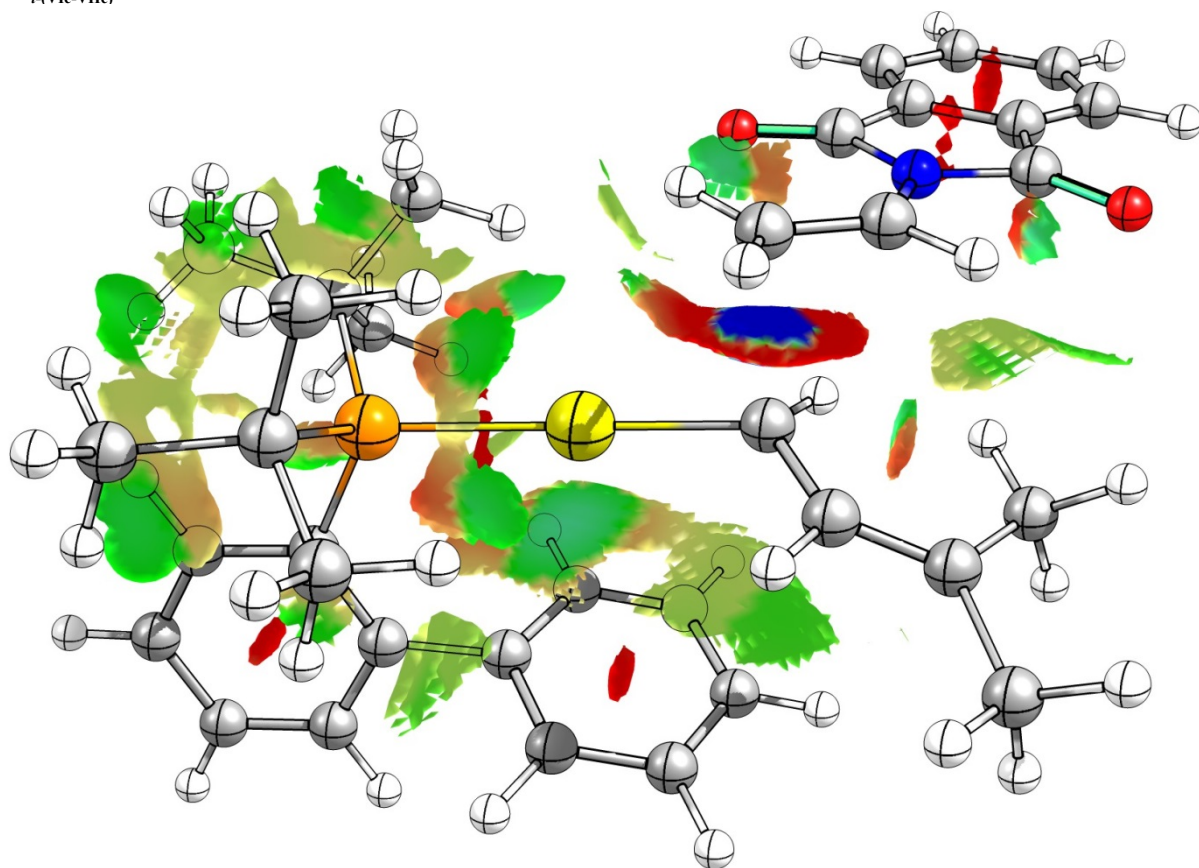

Color range: -0.035  .02



TS<sub>c</sub>(VIa-VIIa)

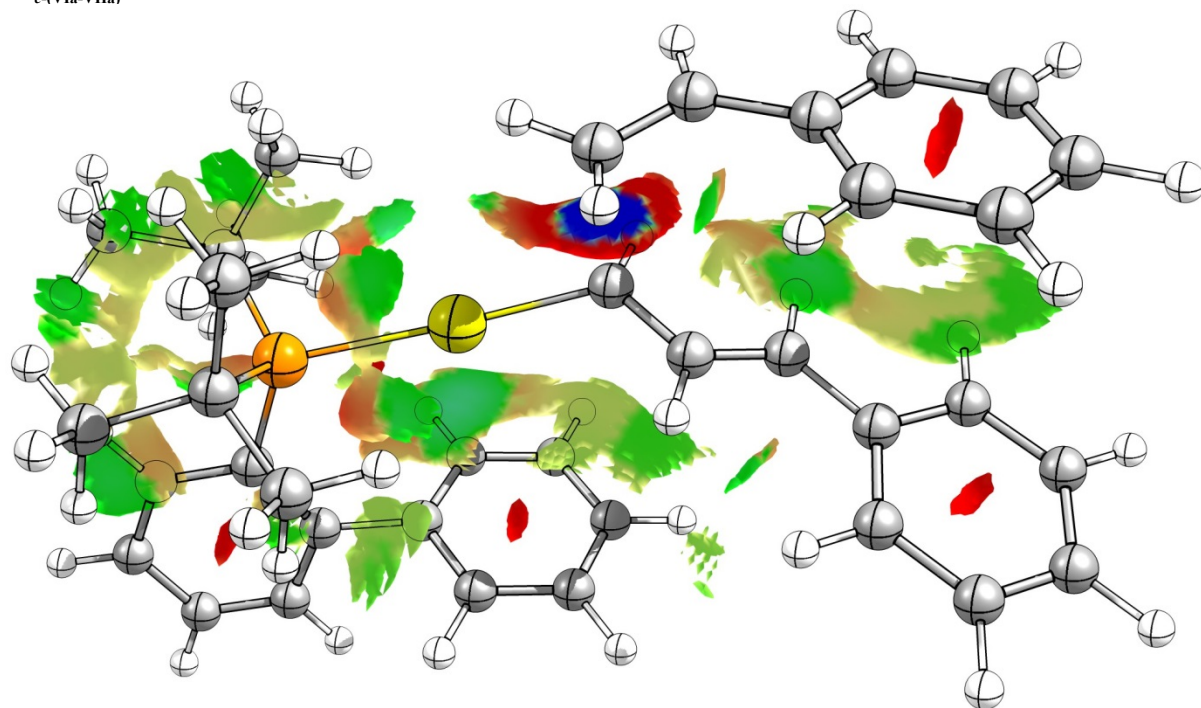

Color range: -0.035  .02

TS<sub>t</sub>(VIa-VIIa)

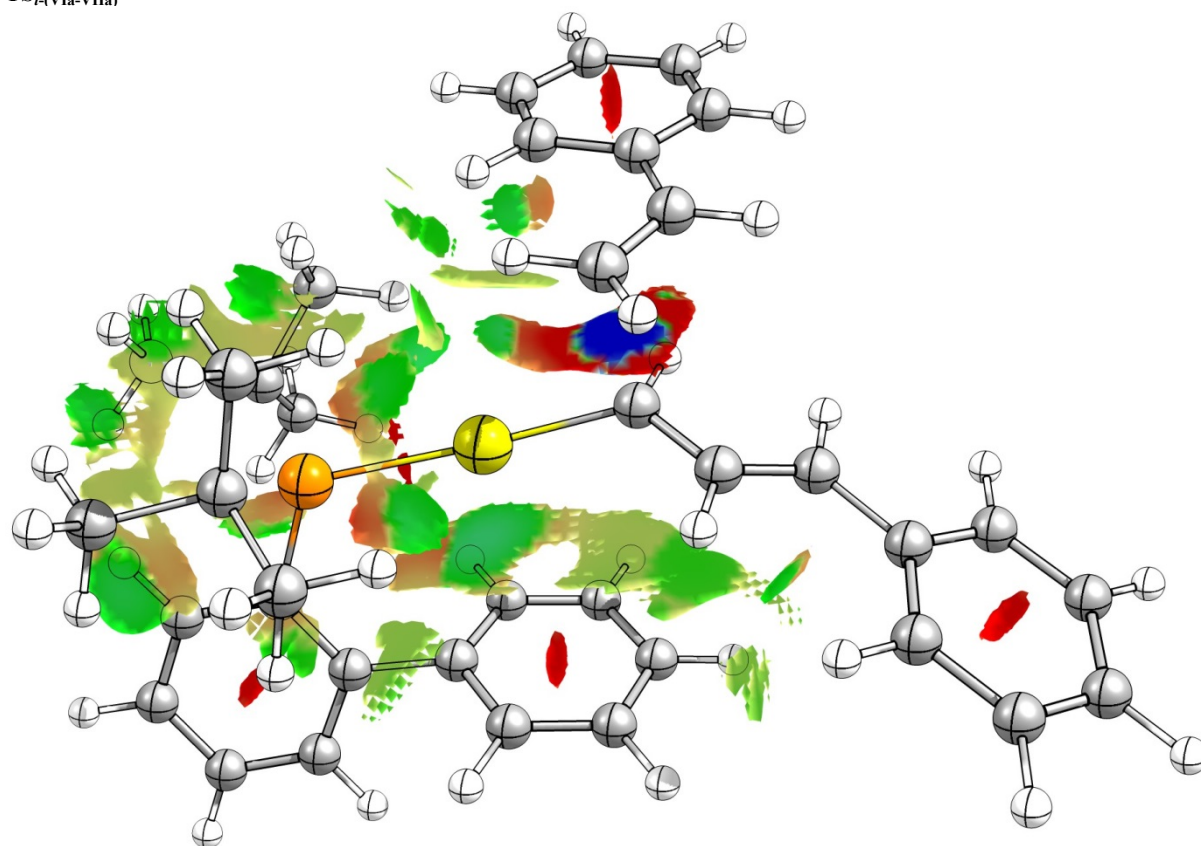

Color range: -0.035  .02

## Natural bond orbital analysis

NBO charges were calculated from previously optimized geometries using NBO version 6.0.<sup>22</sup>

Transition state  $TS_{C-Xb \rightarrow Xb}$

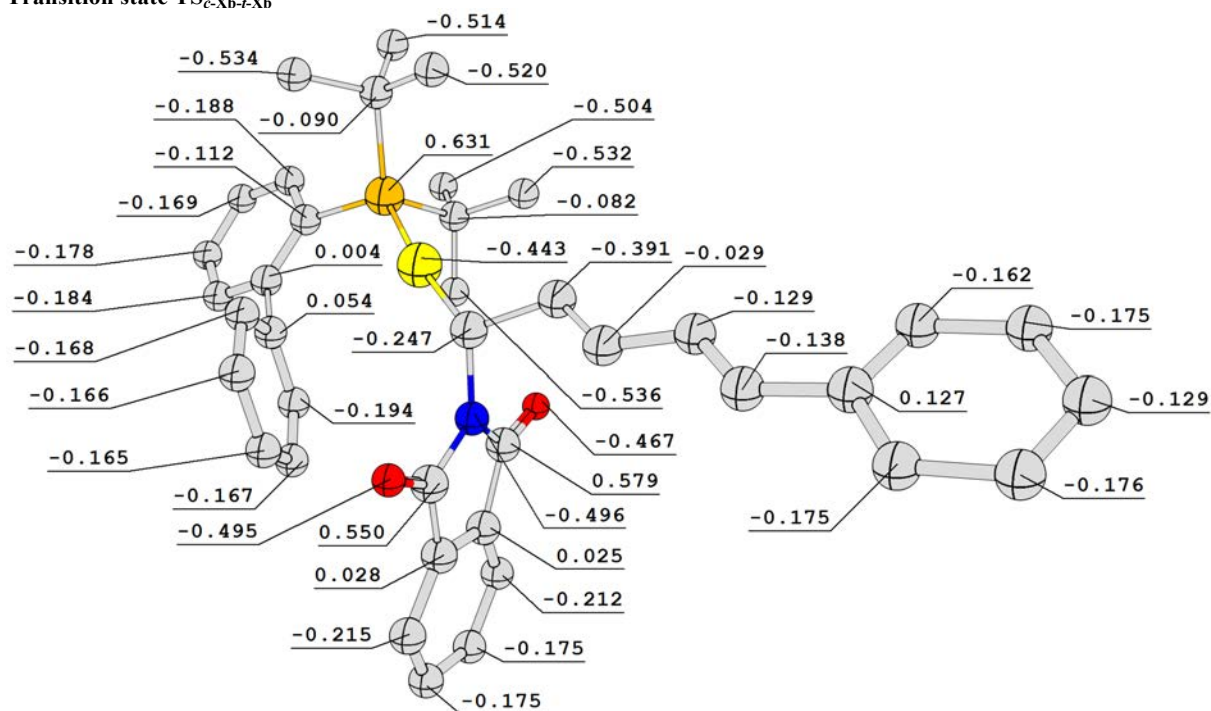

Transition state  $TS_{C-VIIIb \rightarrow VIIIb}$

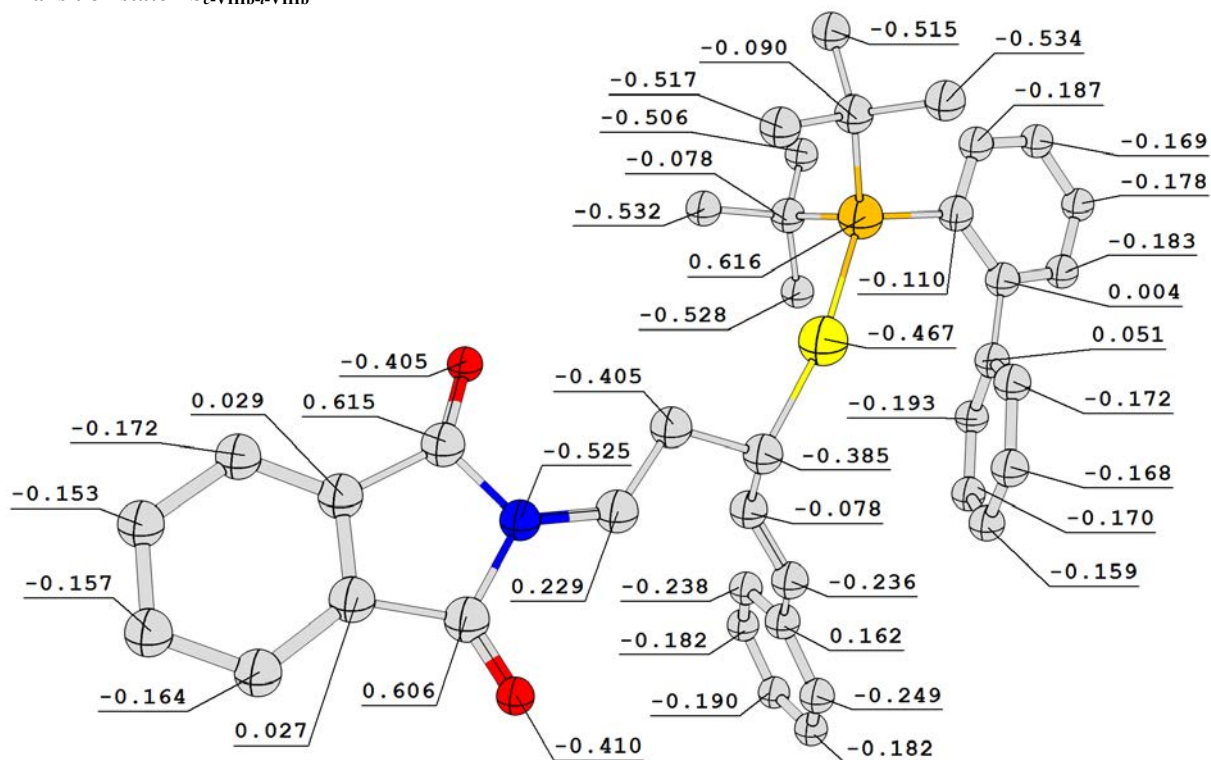

Transition state  $TS_{C-Xc \rightarrow Xc}$

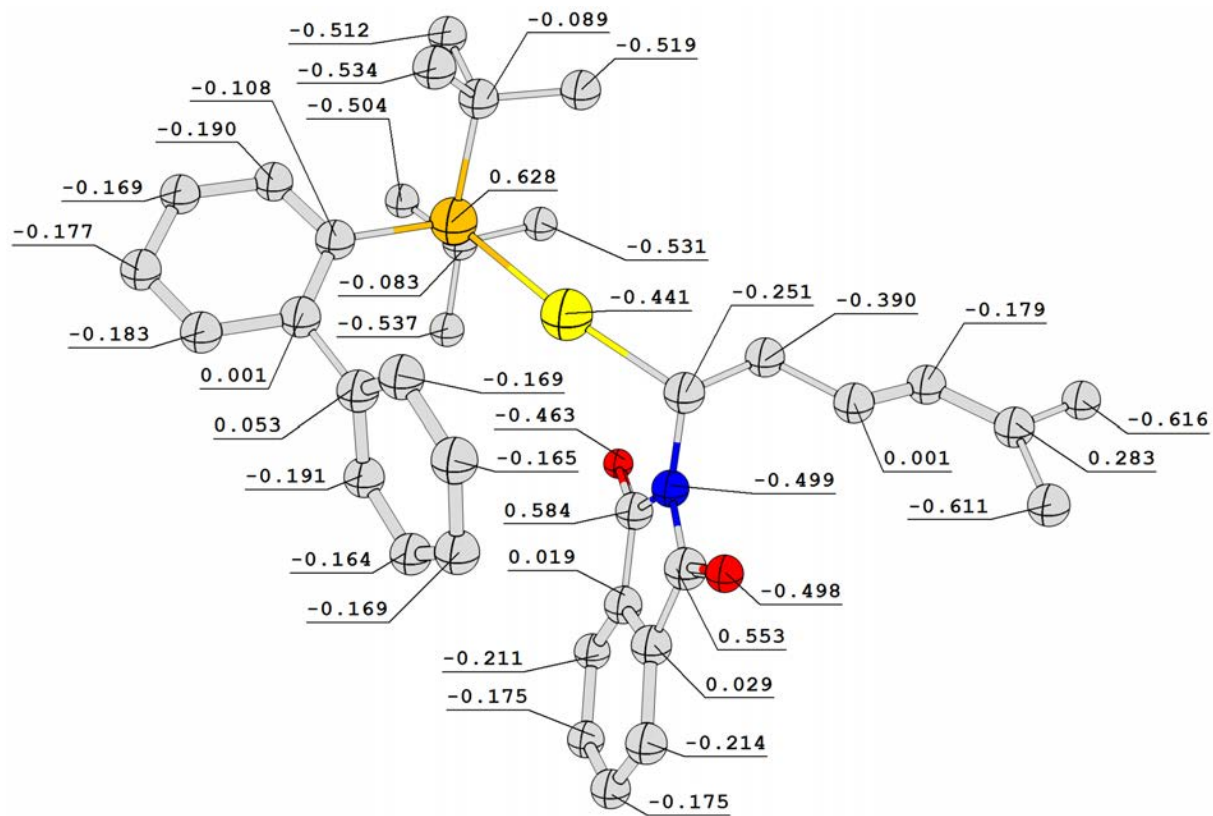

## 12. NMR spectra

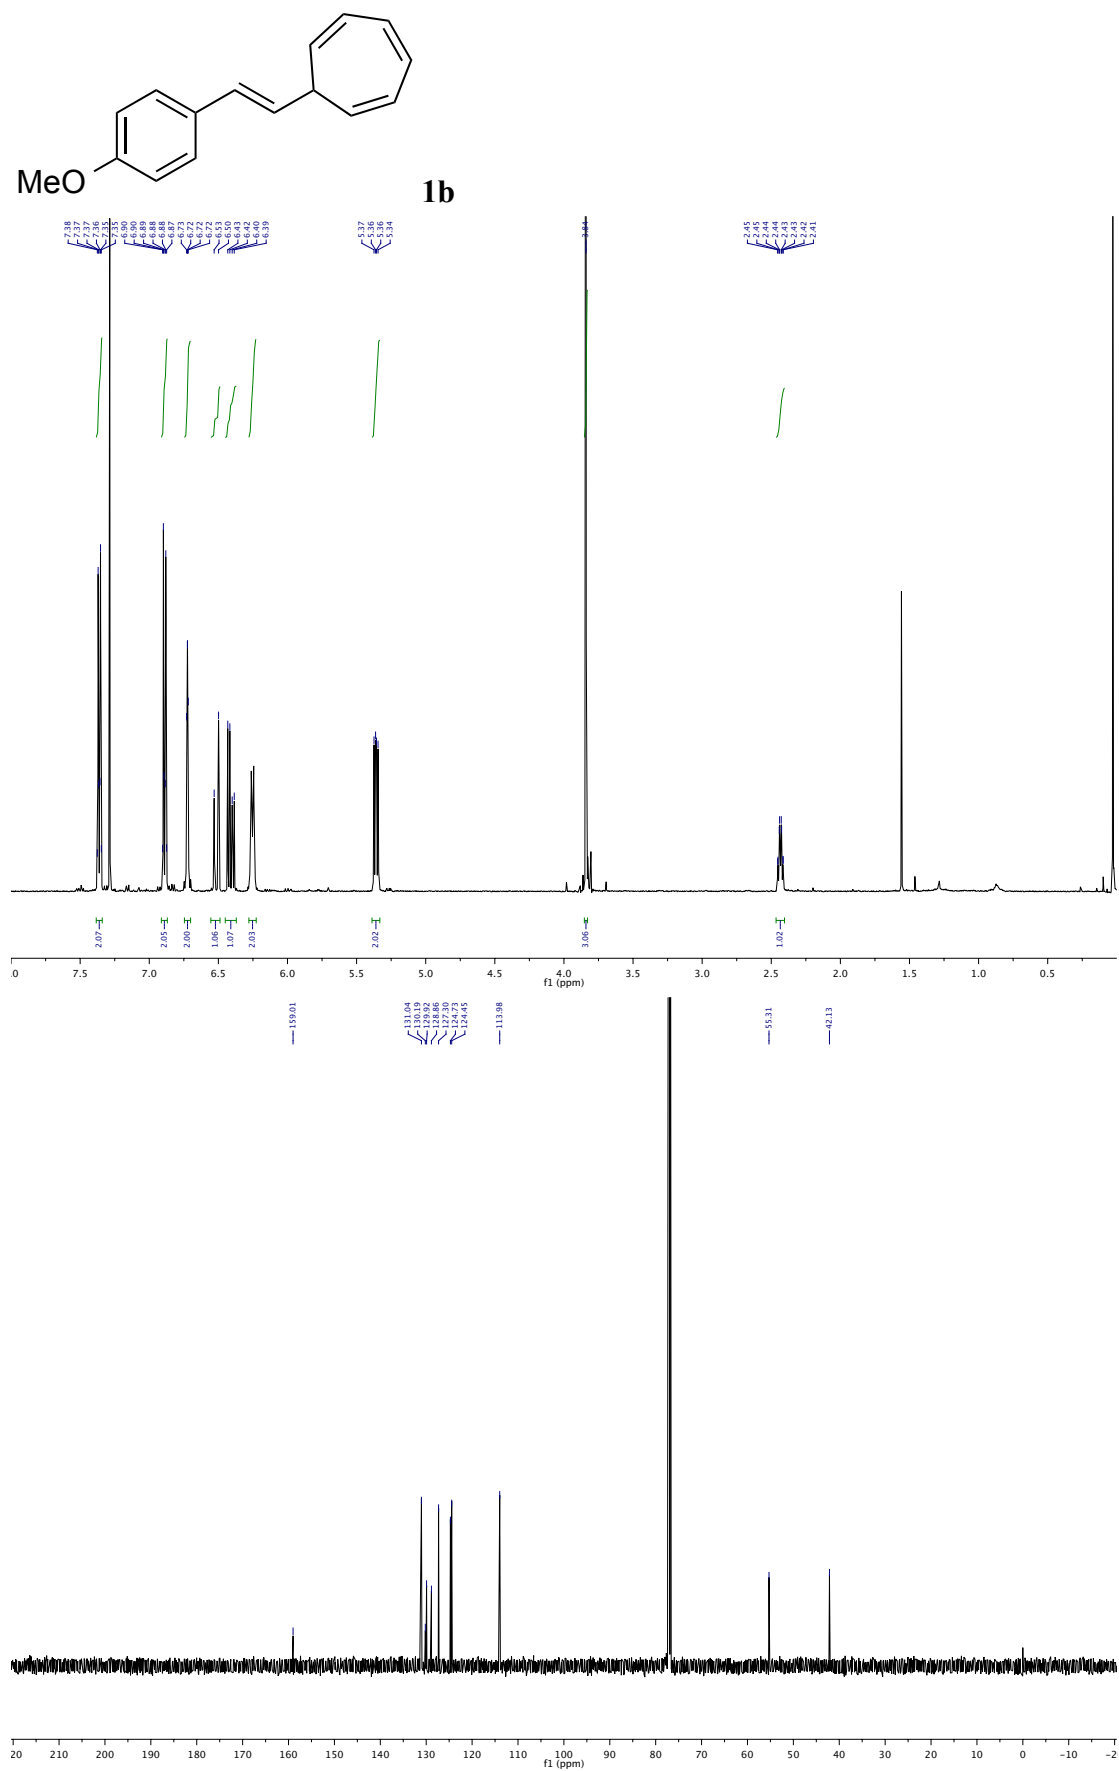



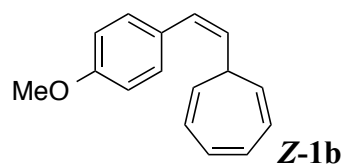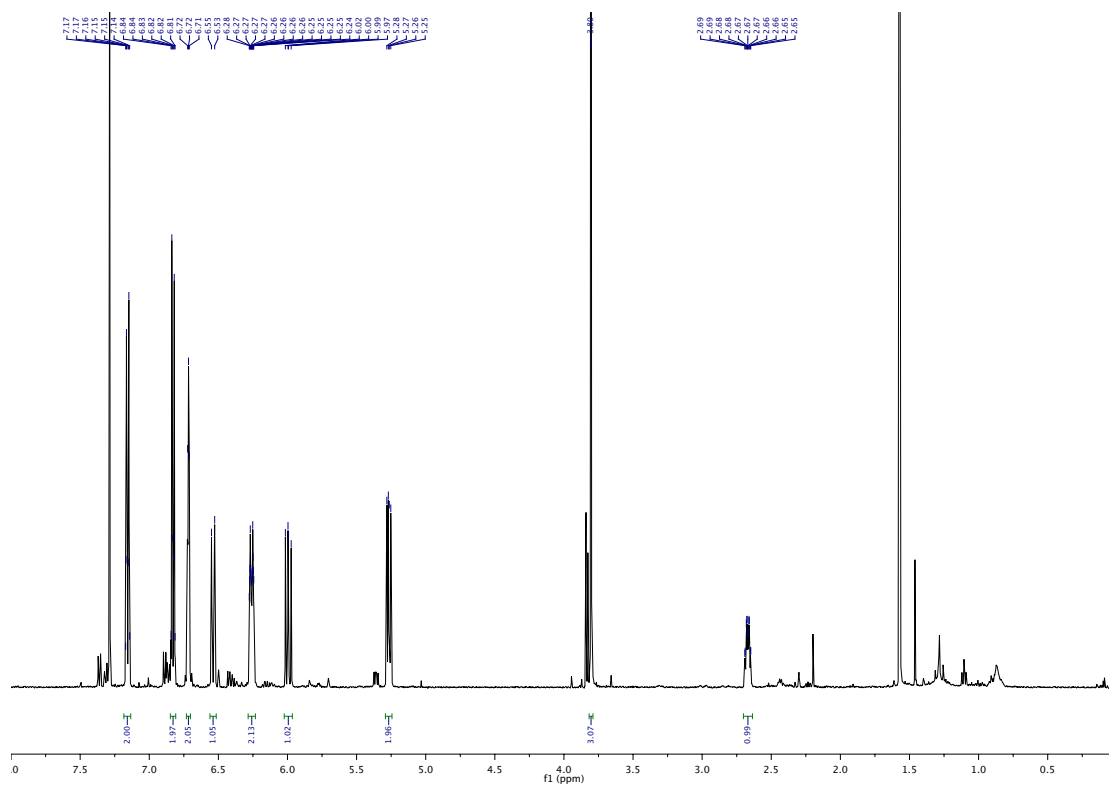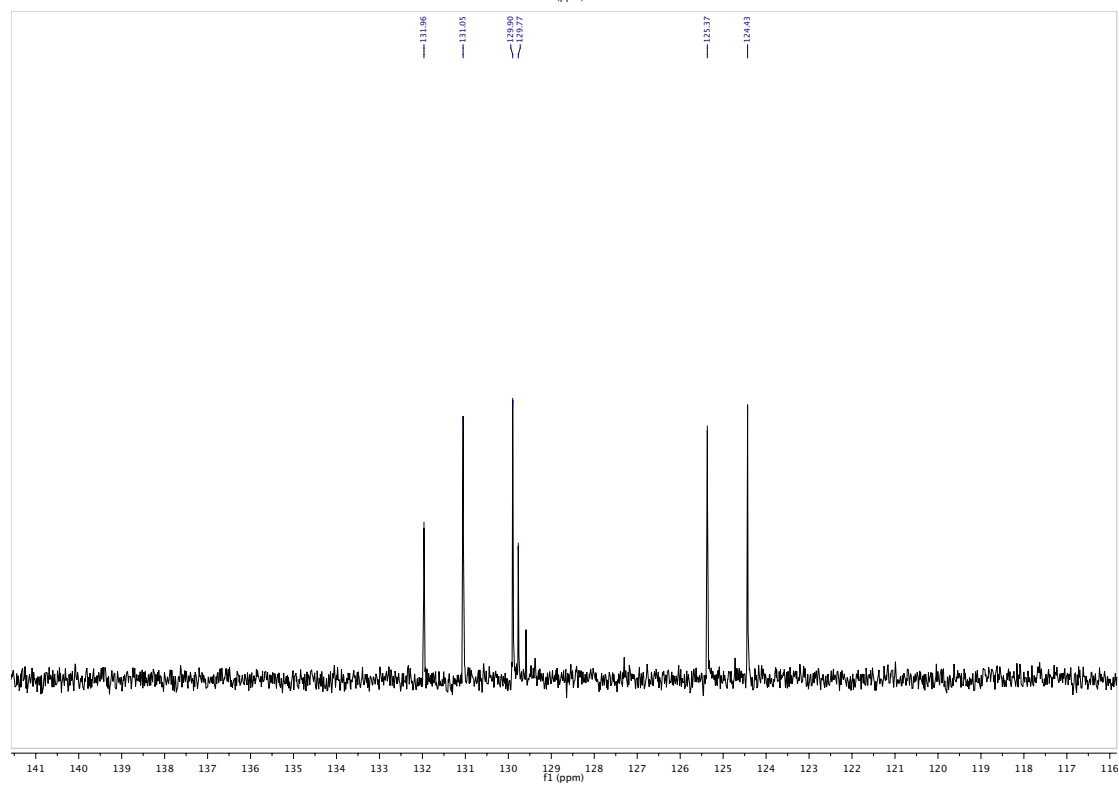

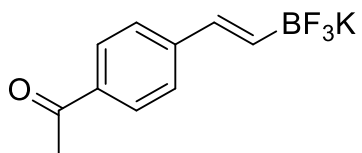

**1c**

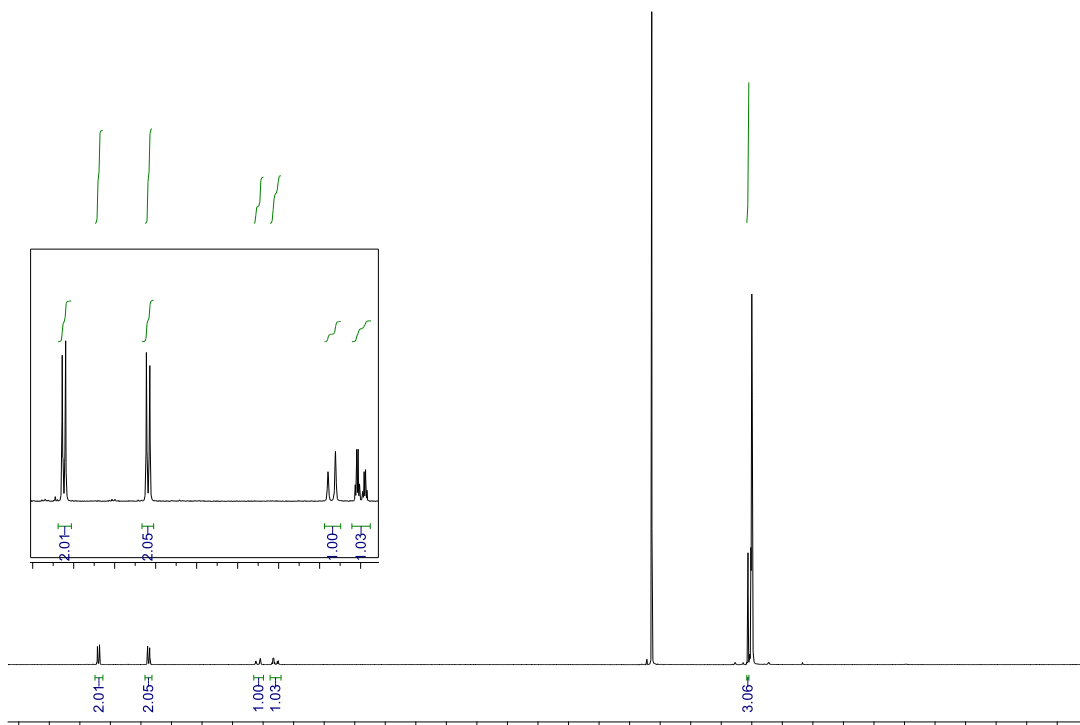

ph353-F2  
 Research Group Echavarren  
 IC1Q\_13C\_HHJ512s DMSO /opt/topspin pholstein 68

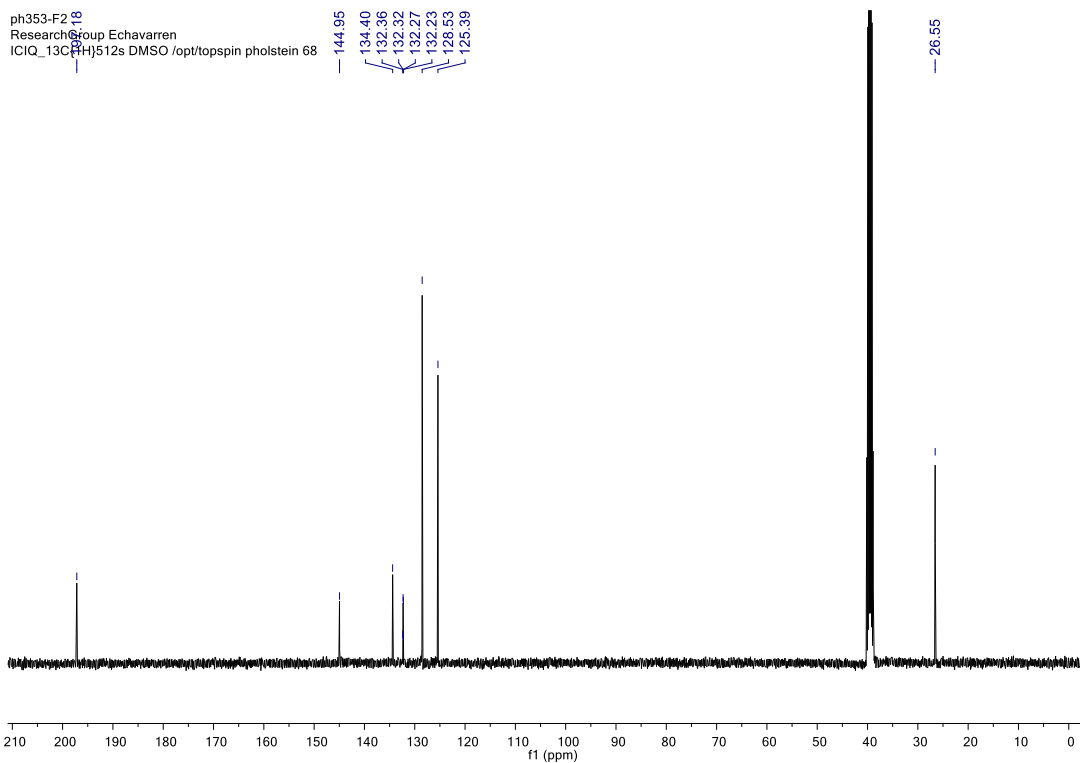

ph353-F2  
ResearchGroup Echavarren  
ICIQ\_19F{1H} DMSO /opt/topspin pholstein 3

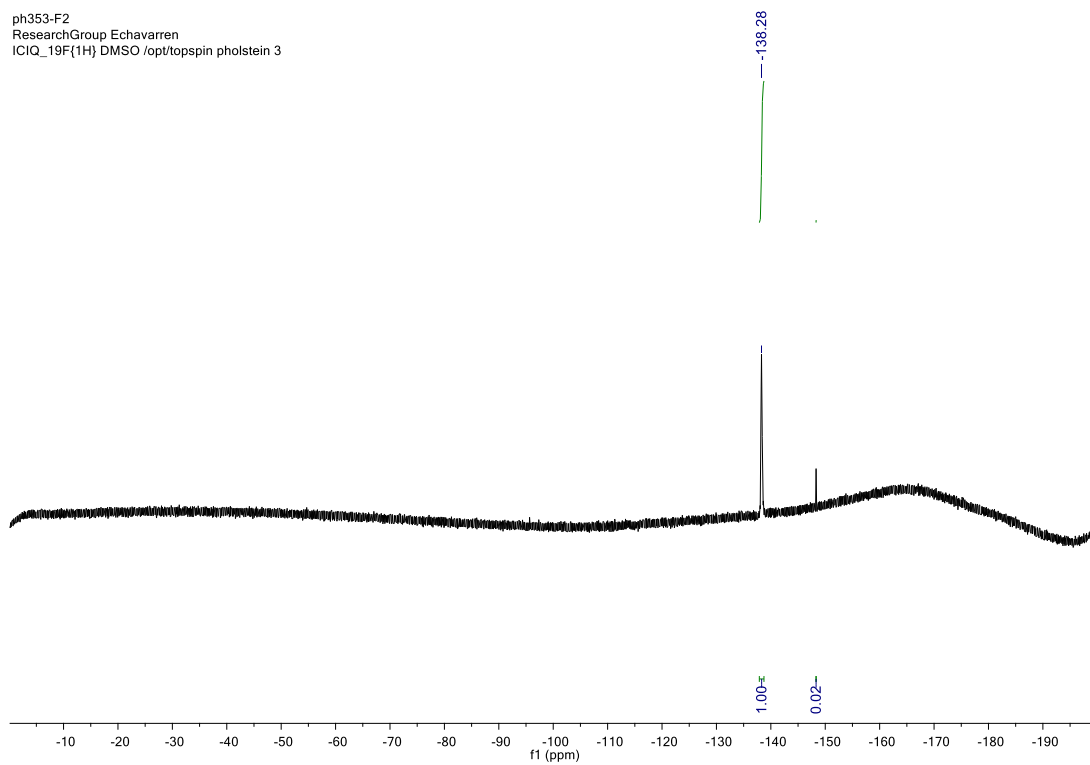

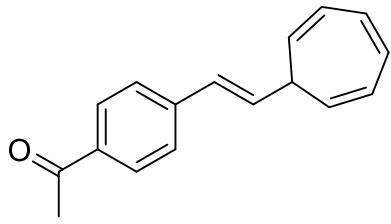

**1c**

ph357-F1  
 ResearchGroup Echavarren  
 ICIQ\_1H12p8s CDCl3 /opt/topspin pholstein 25

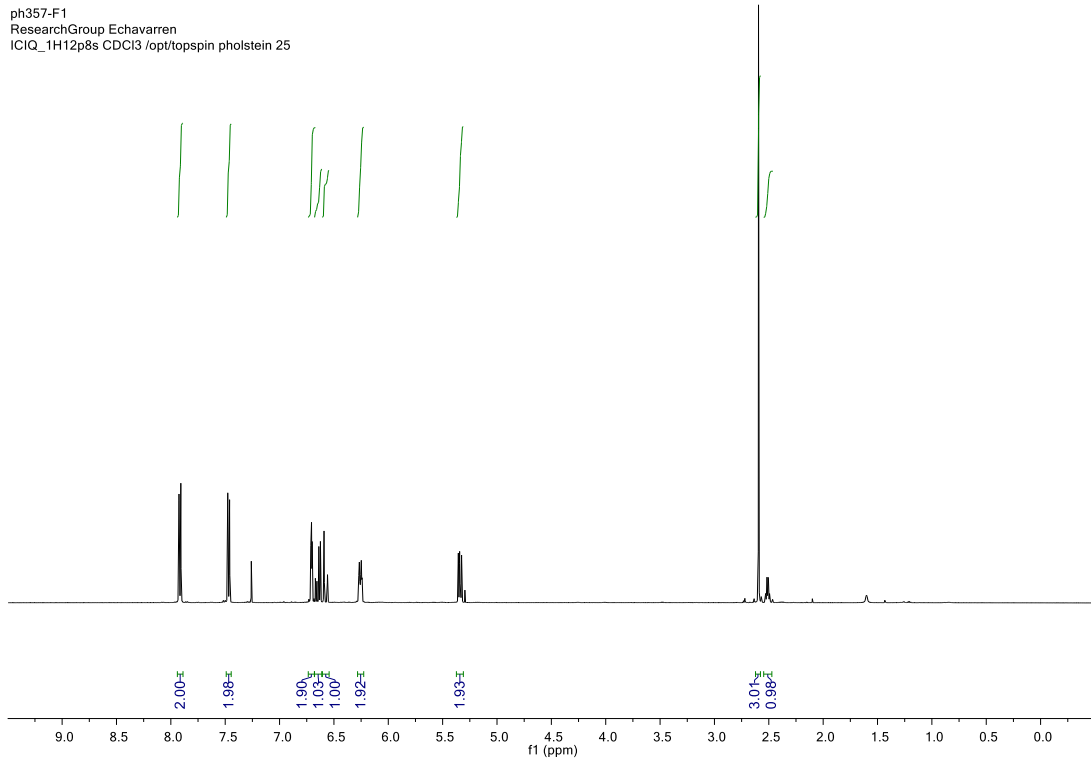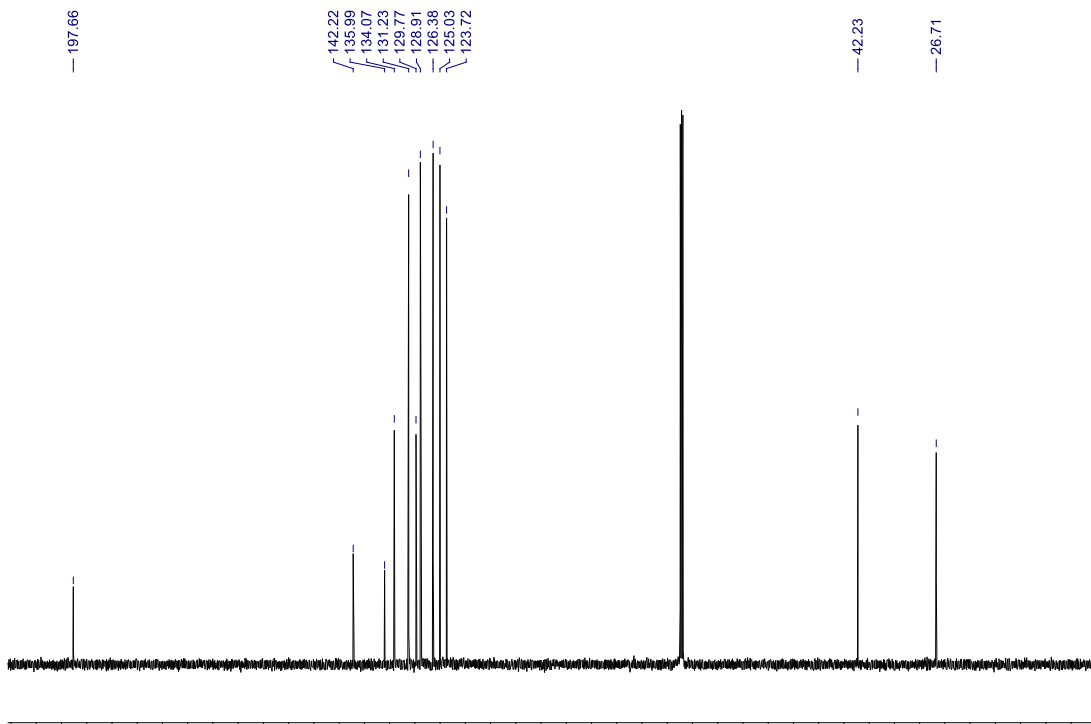

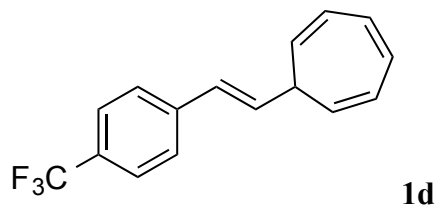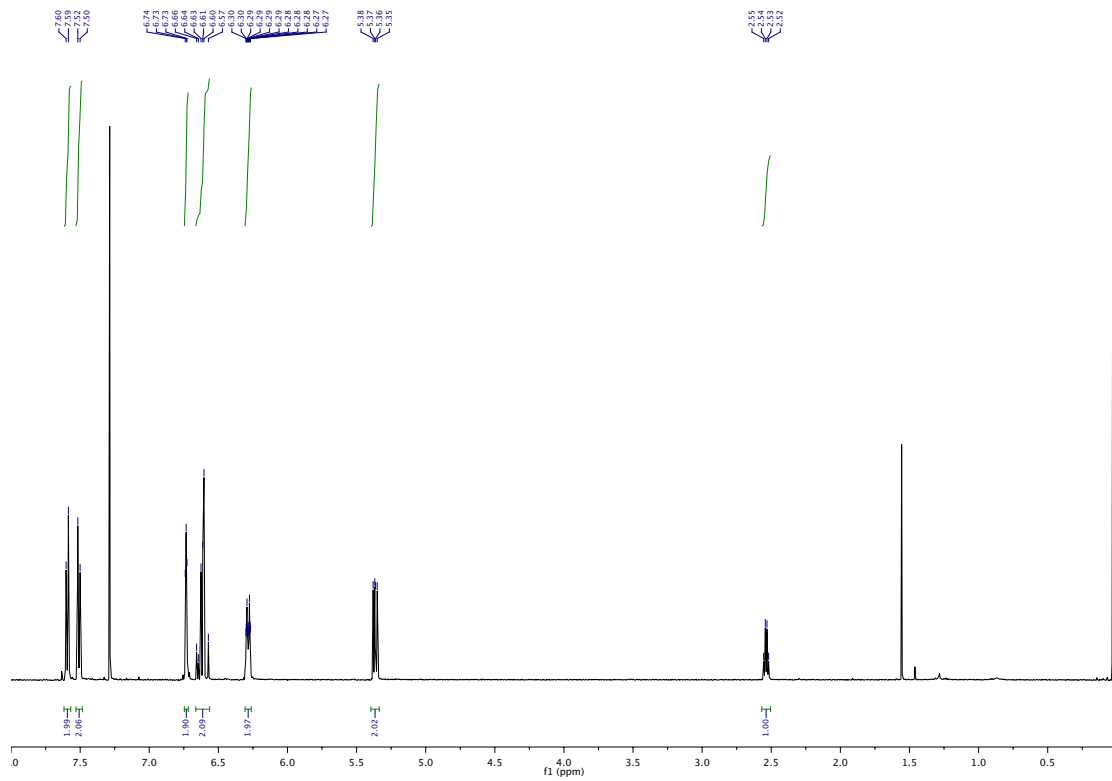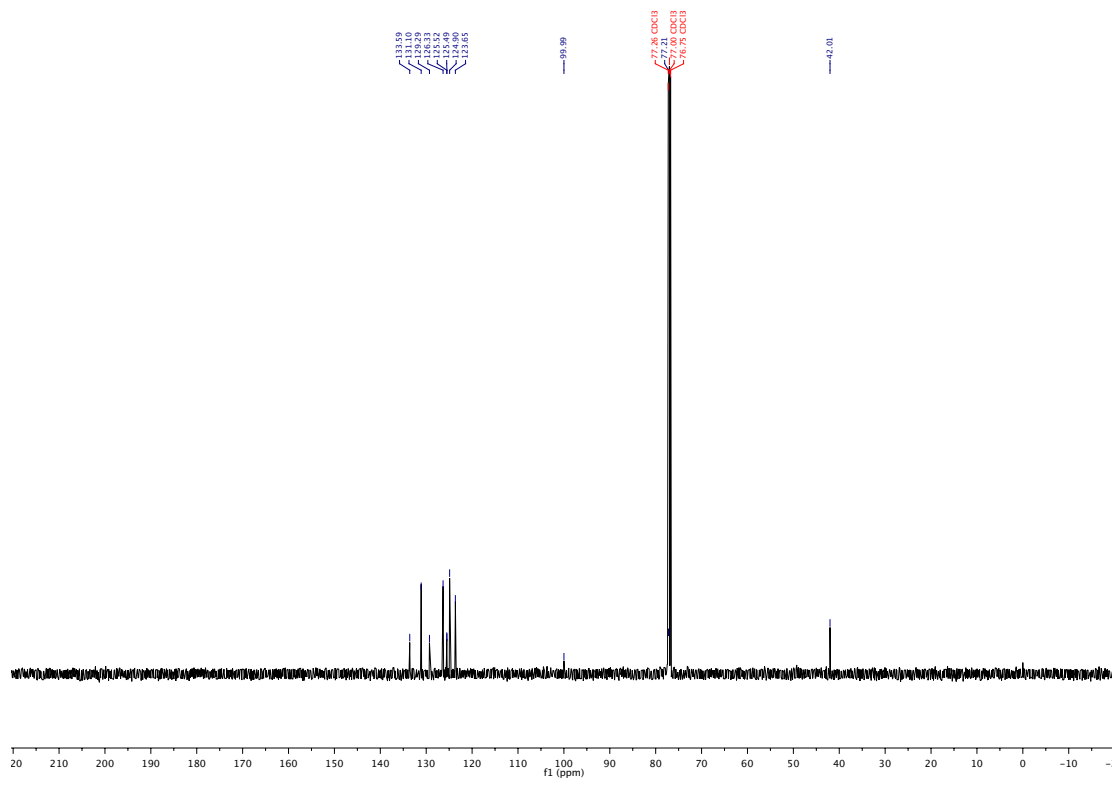

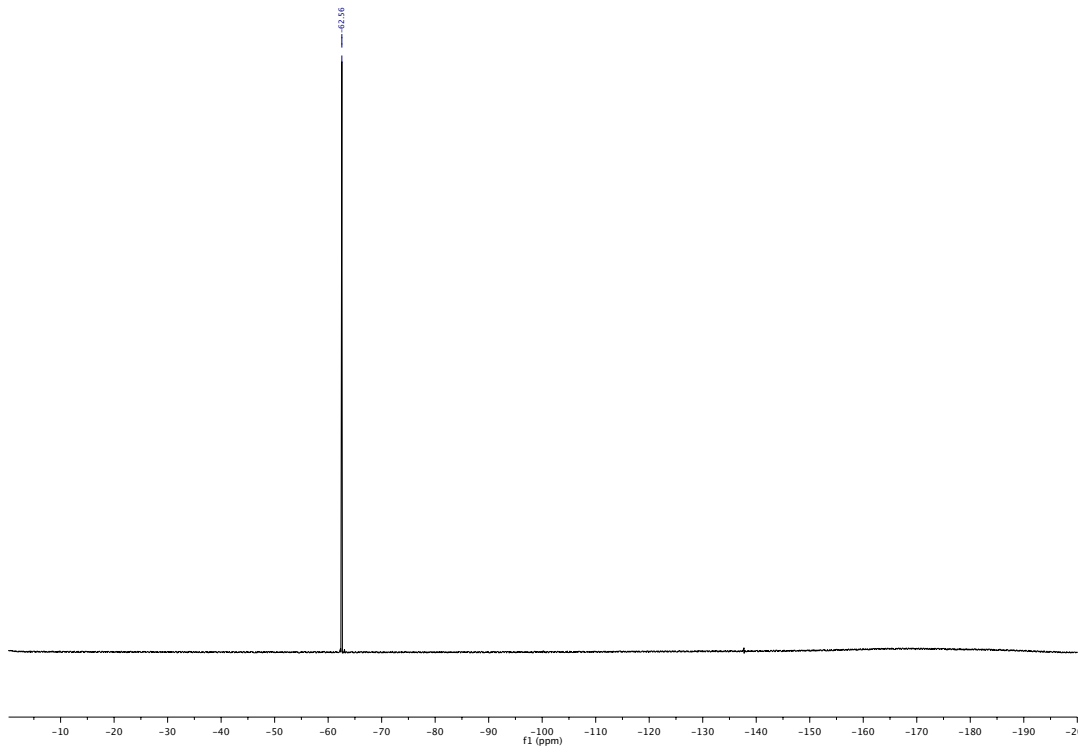

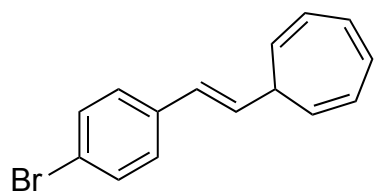

1e

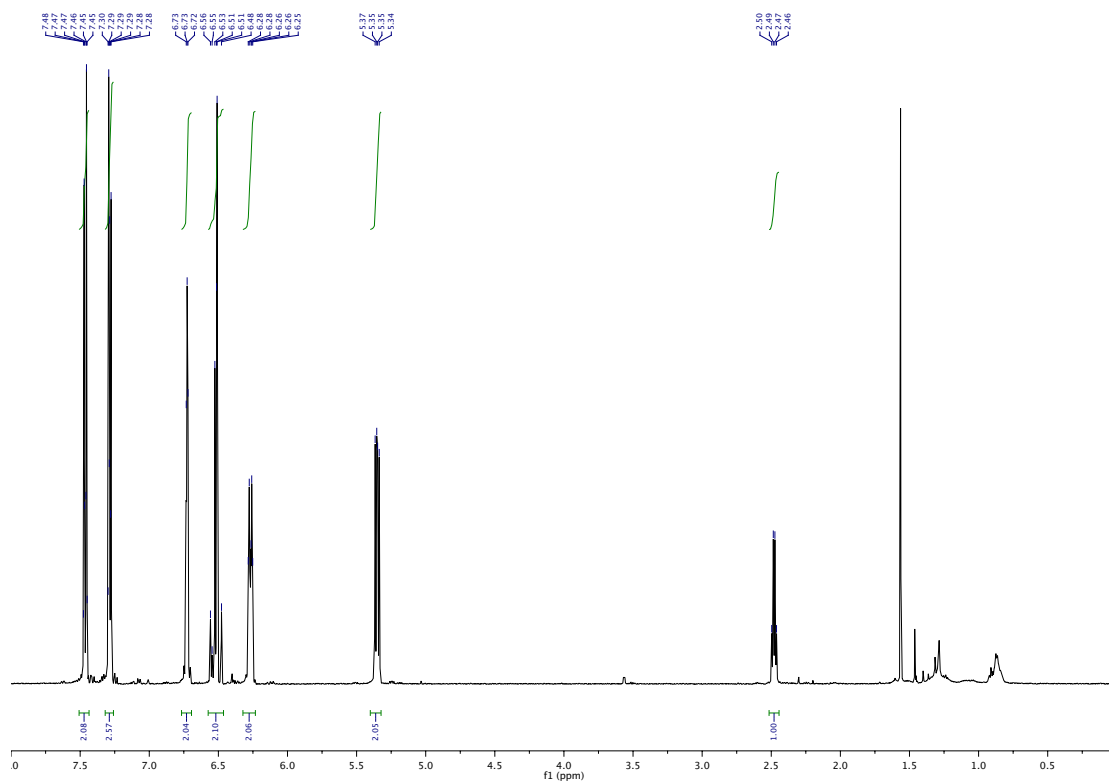

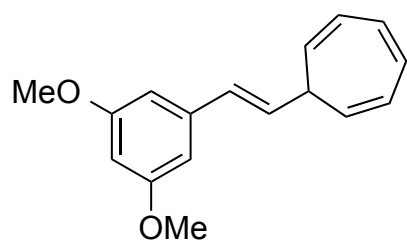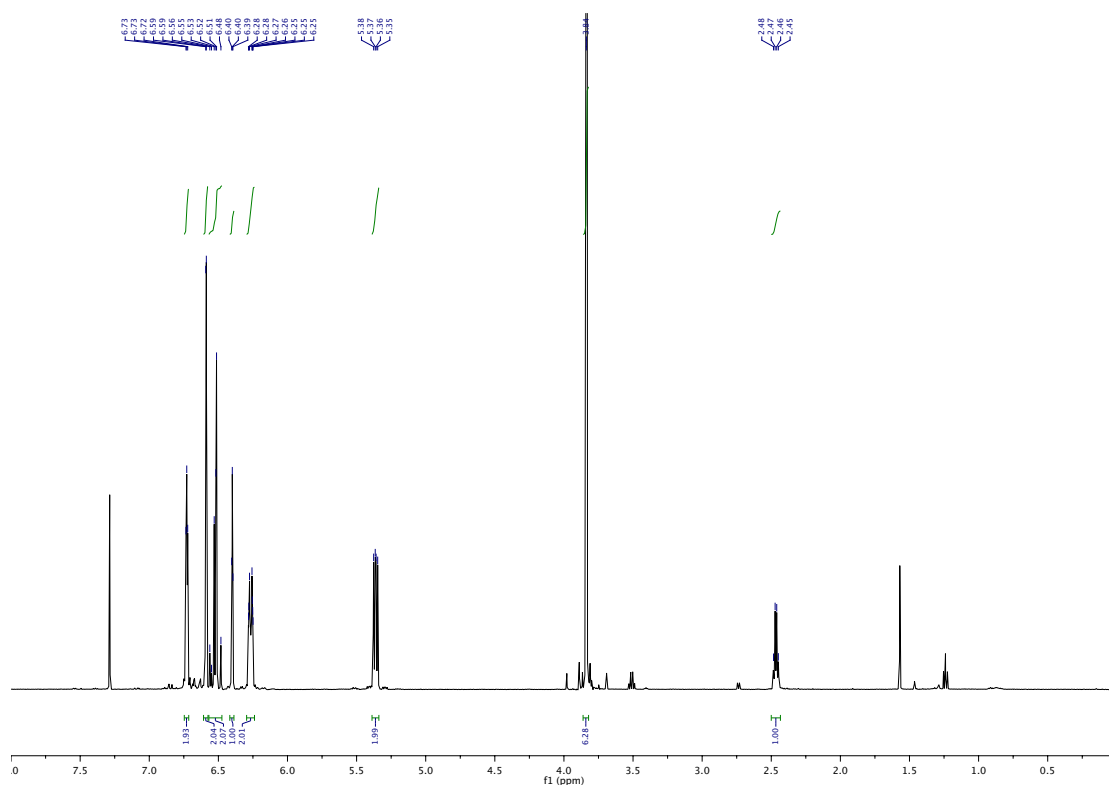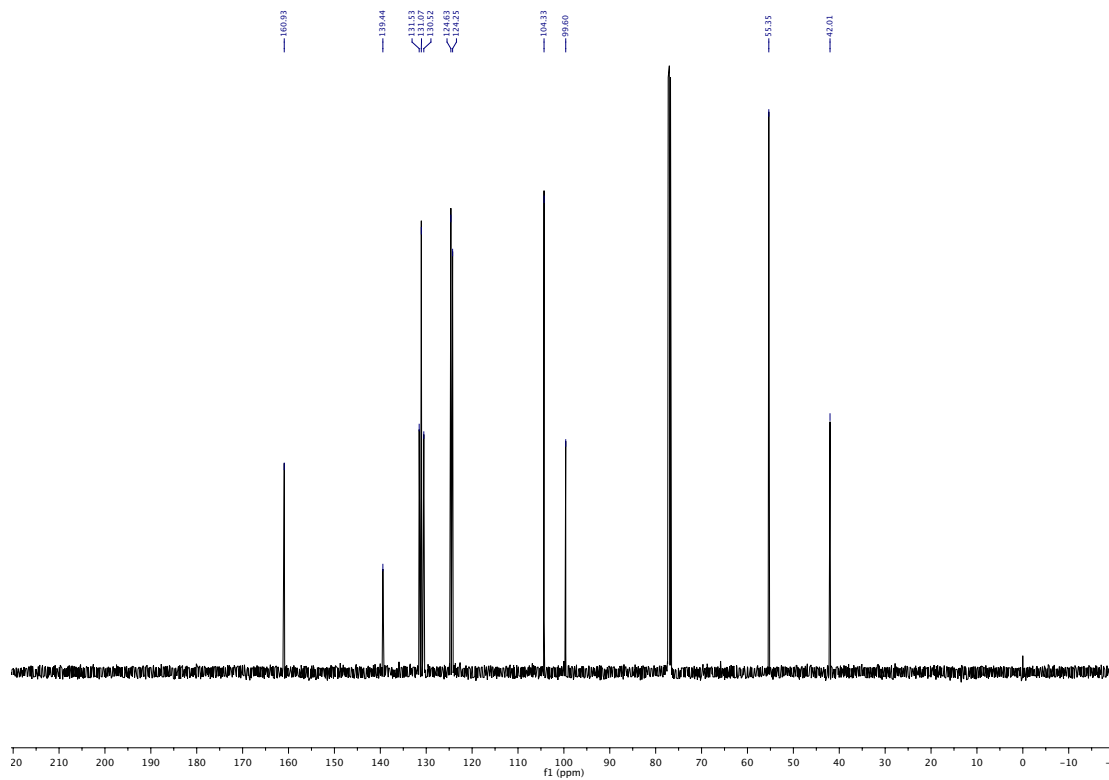



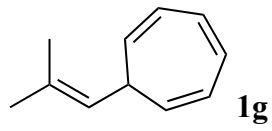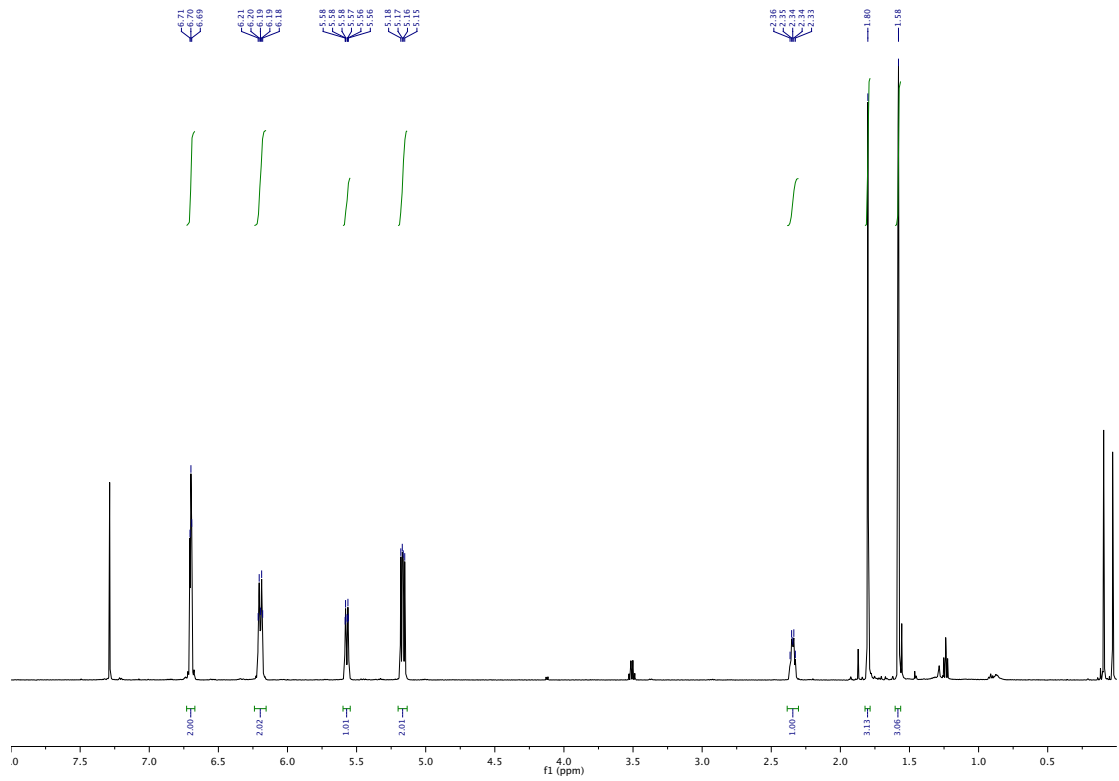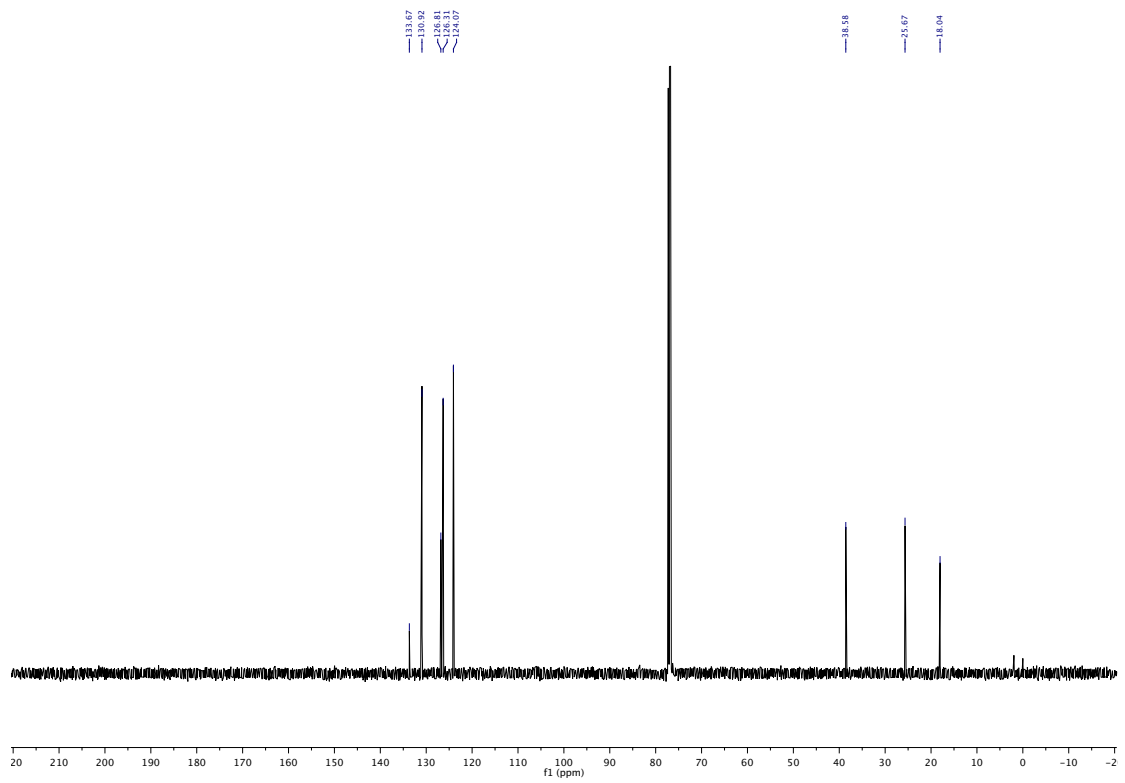

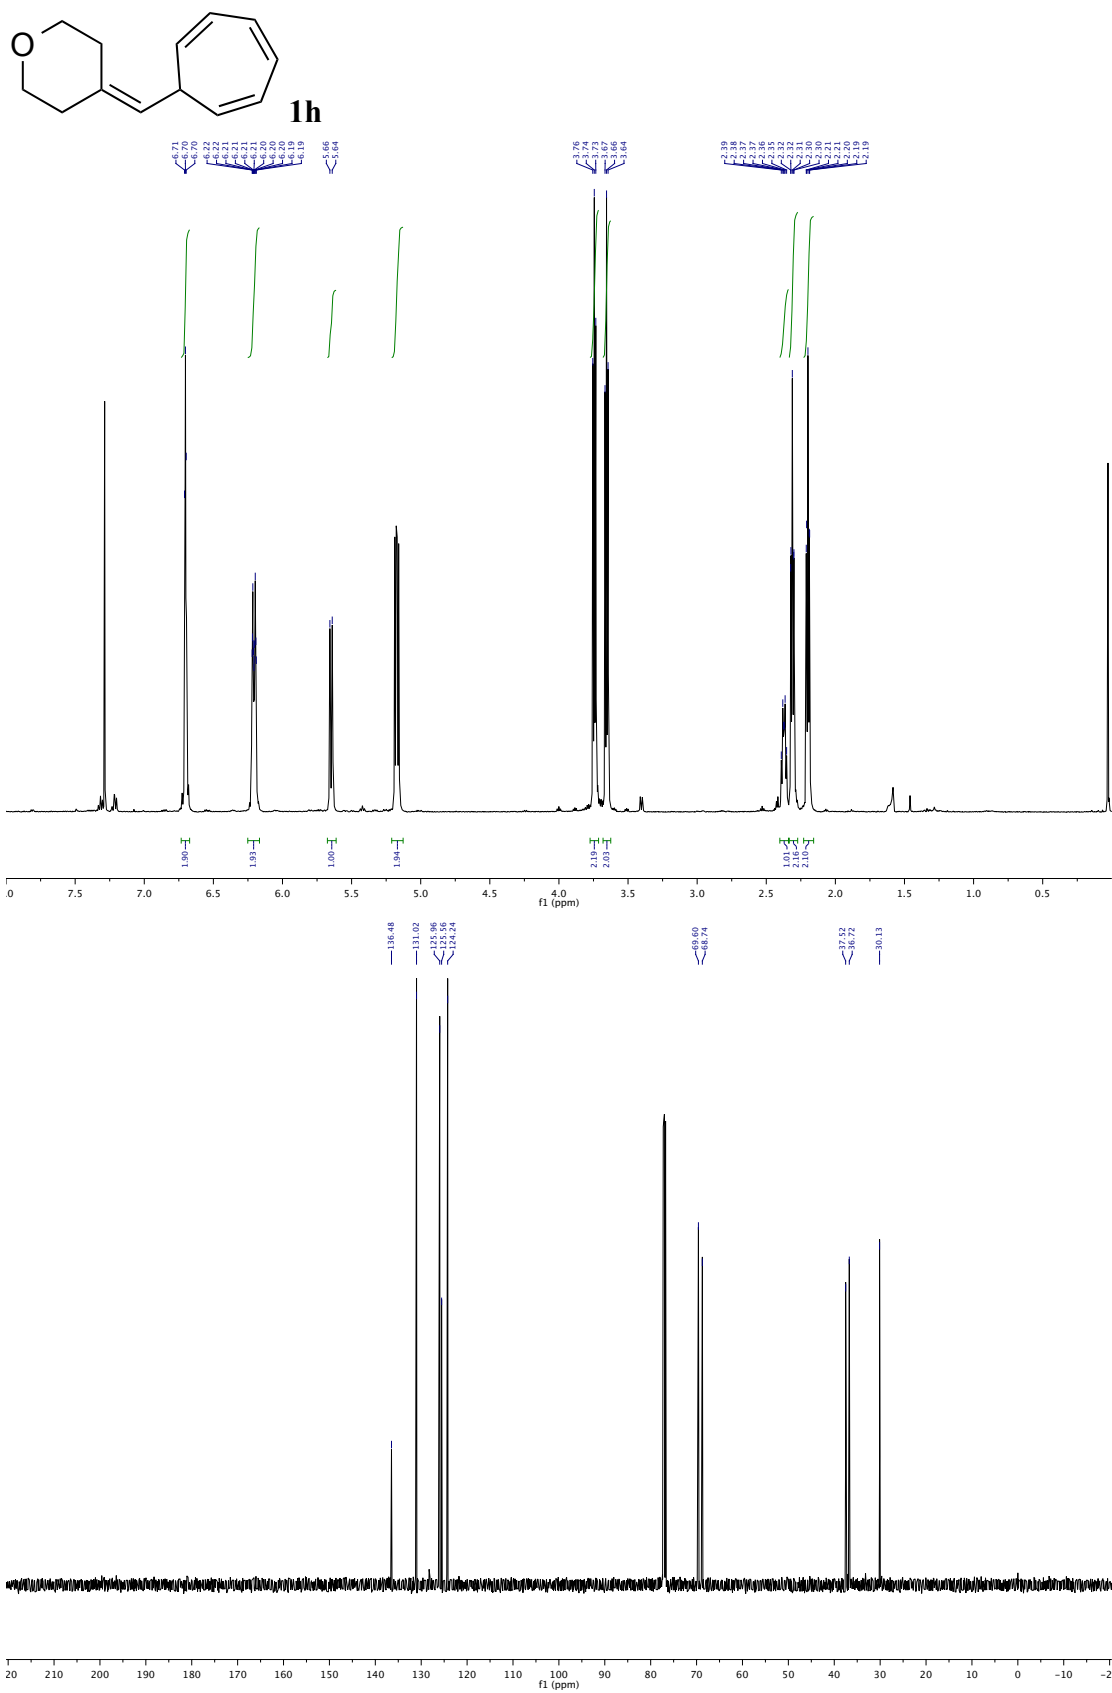

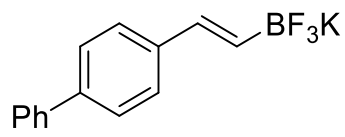

**1i**

ph354  
ResearchGroup Echavarren  
ICIQ\_1H12p8s DMSO /opt/topspin pholstein 35

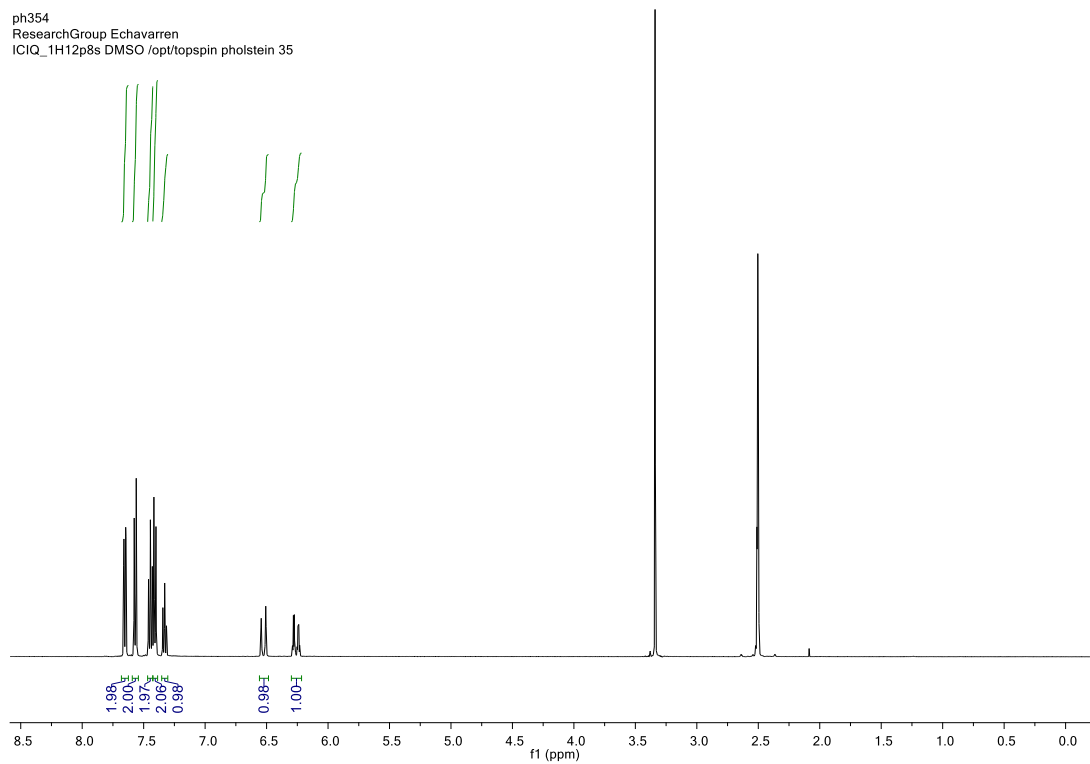

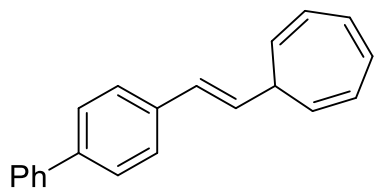

**1i**

ph361-f1  
 ResearchGroup Echavarren  
 ICIQ\_1H12p8s CDCl3 /opt/topspin pholstein 40

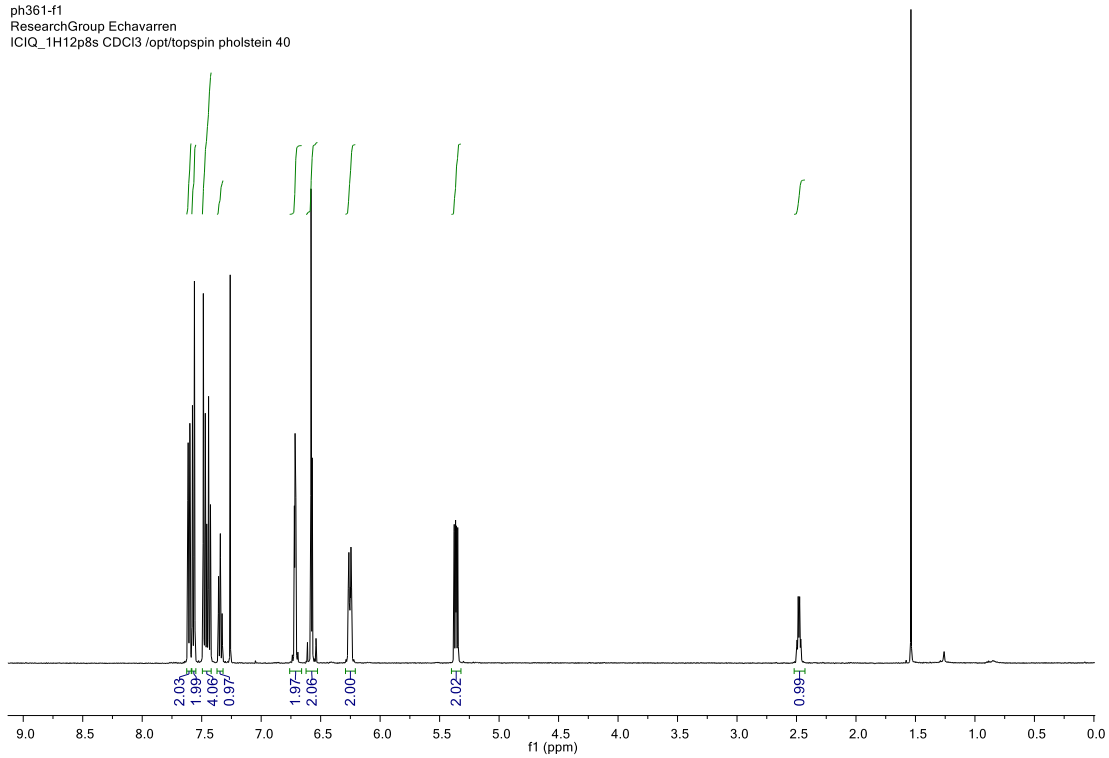

ph269  
 ResearchGroup Echavarren  
 ICIQ\_13C(1H)512s CDCl3 /opt/topspin pholstein

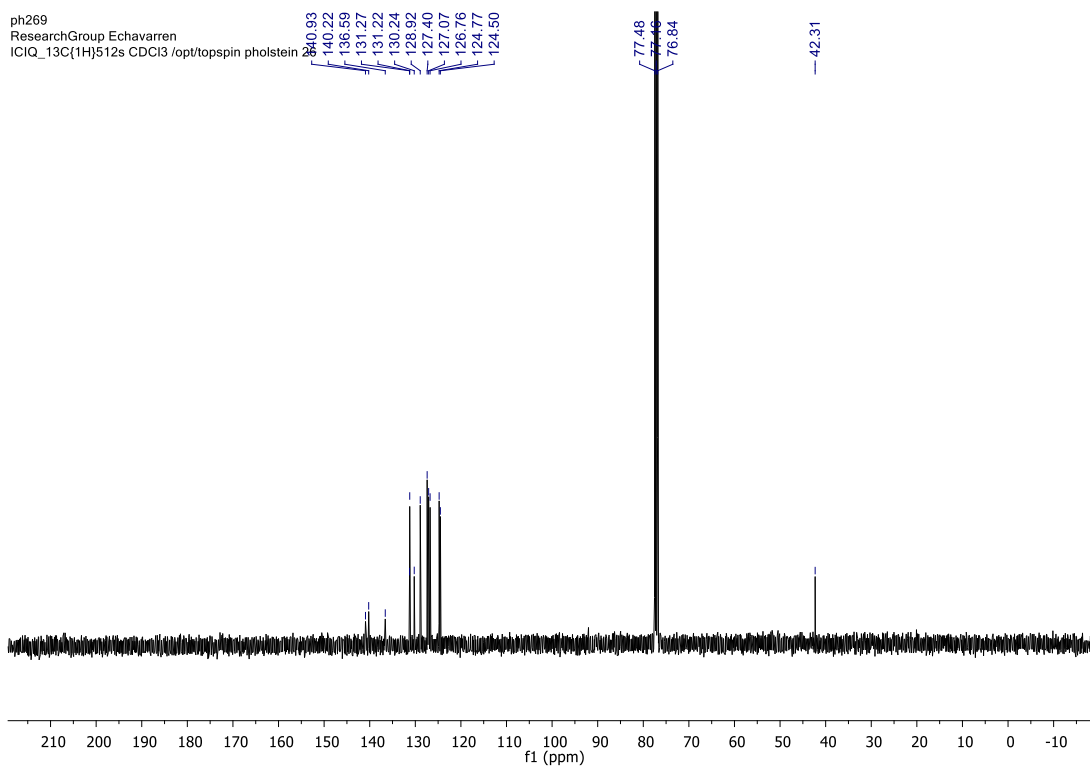

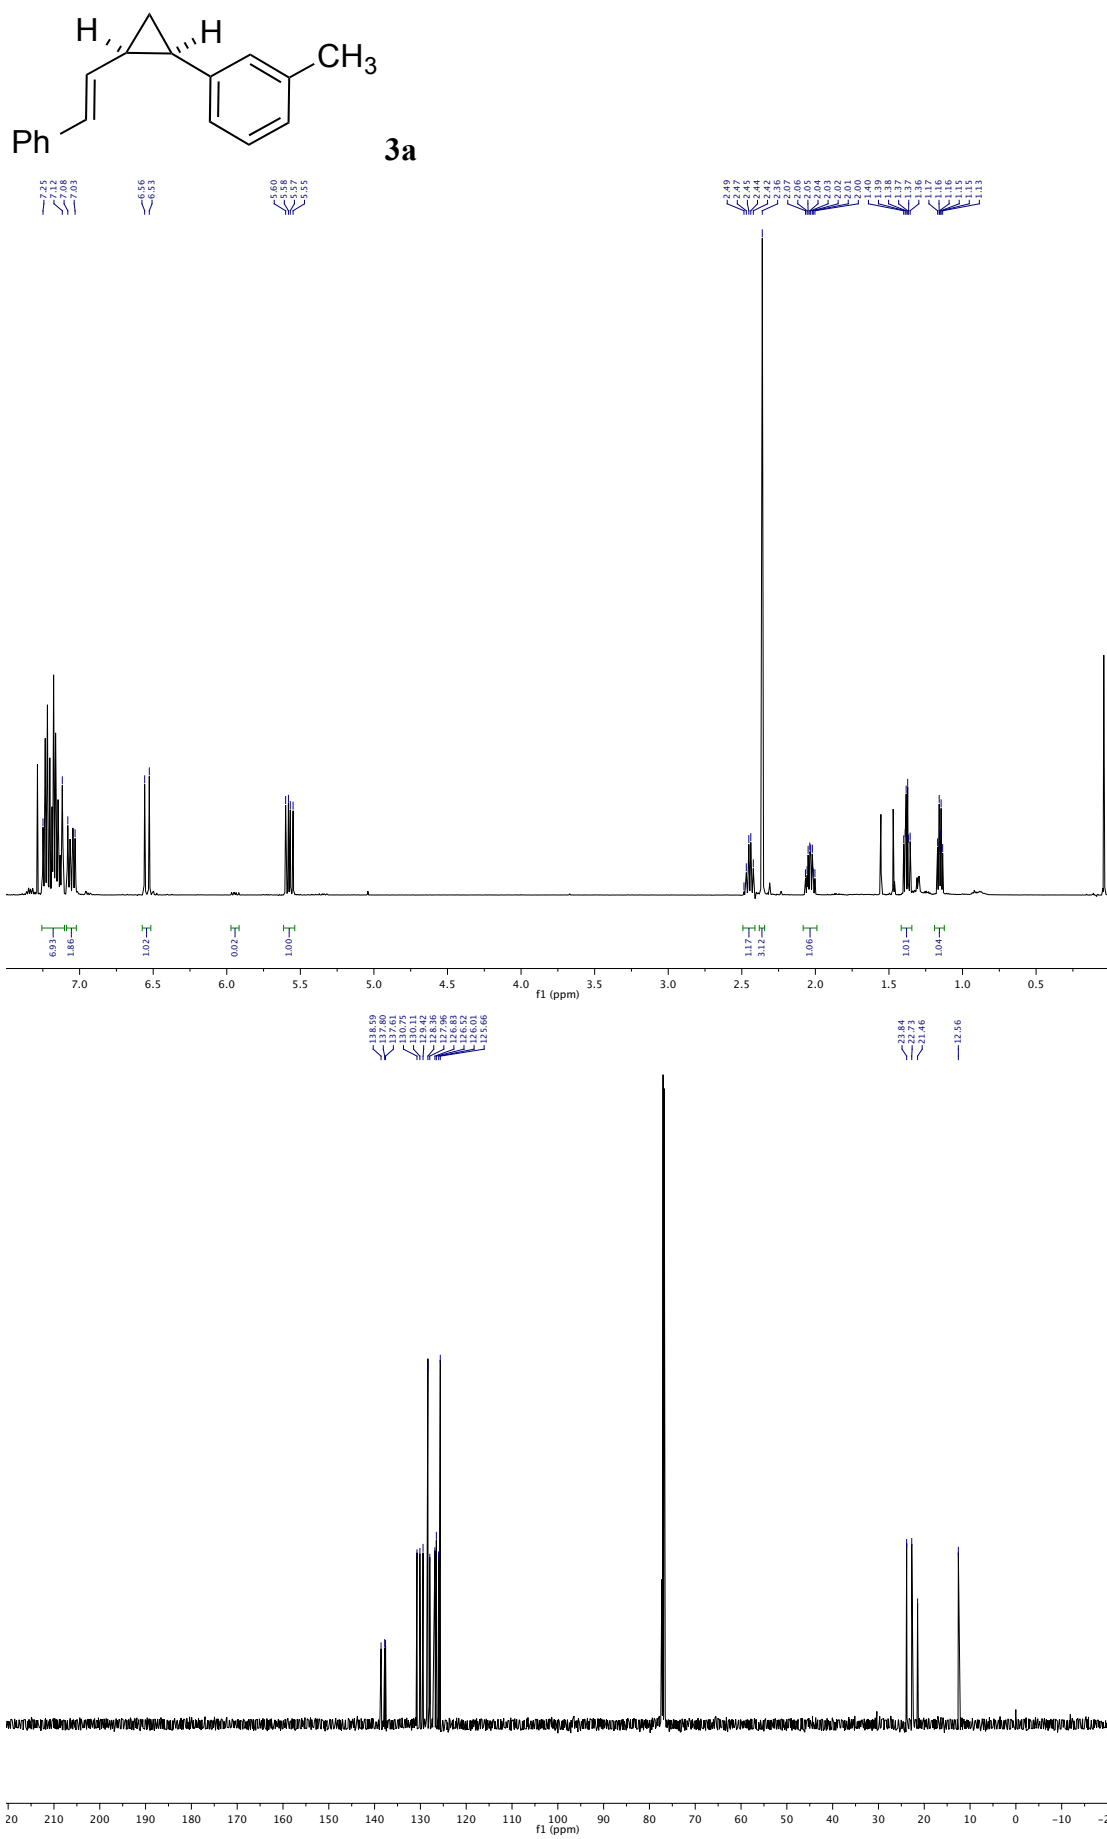

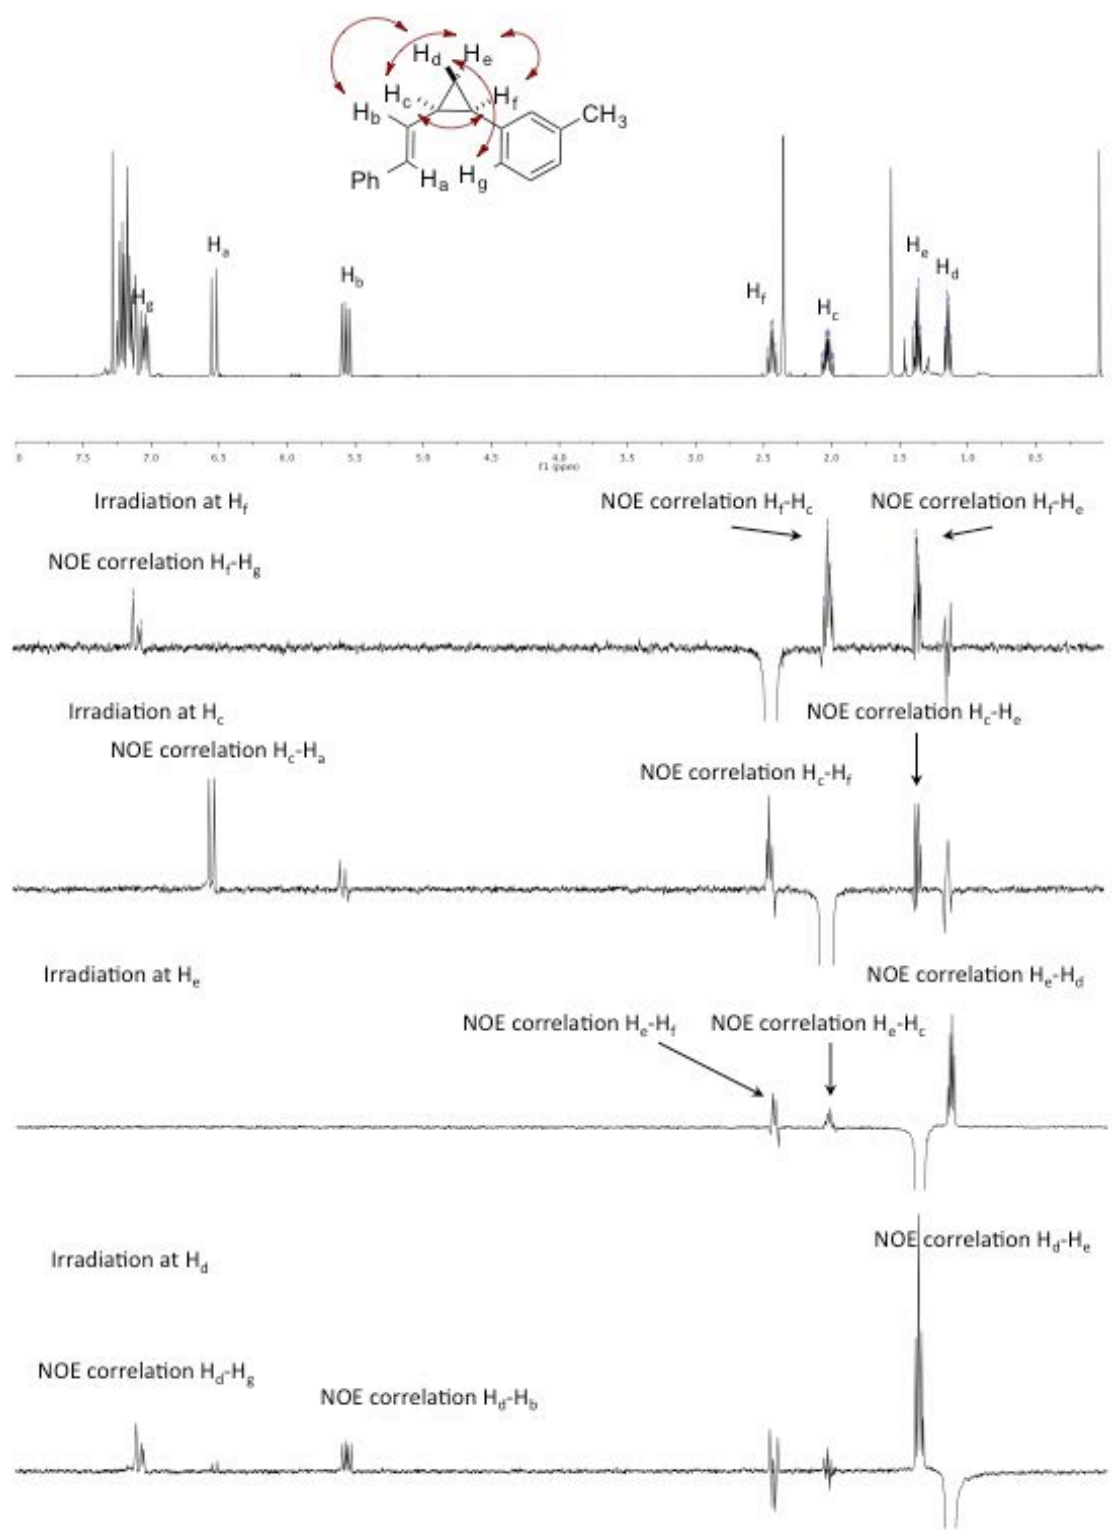

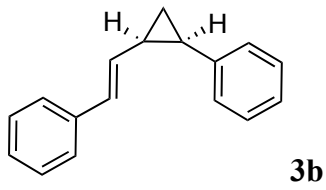

ph246.10.fid  
 ResearchGroup.Echavarren  
 ICIQ\_1H12p8s CDCI3 /opt/topspin pholstein 31

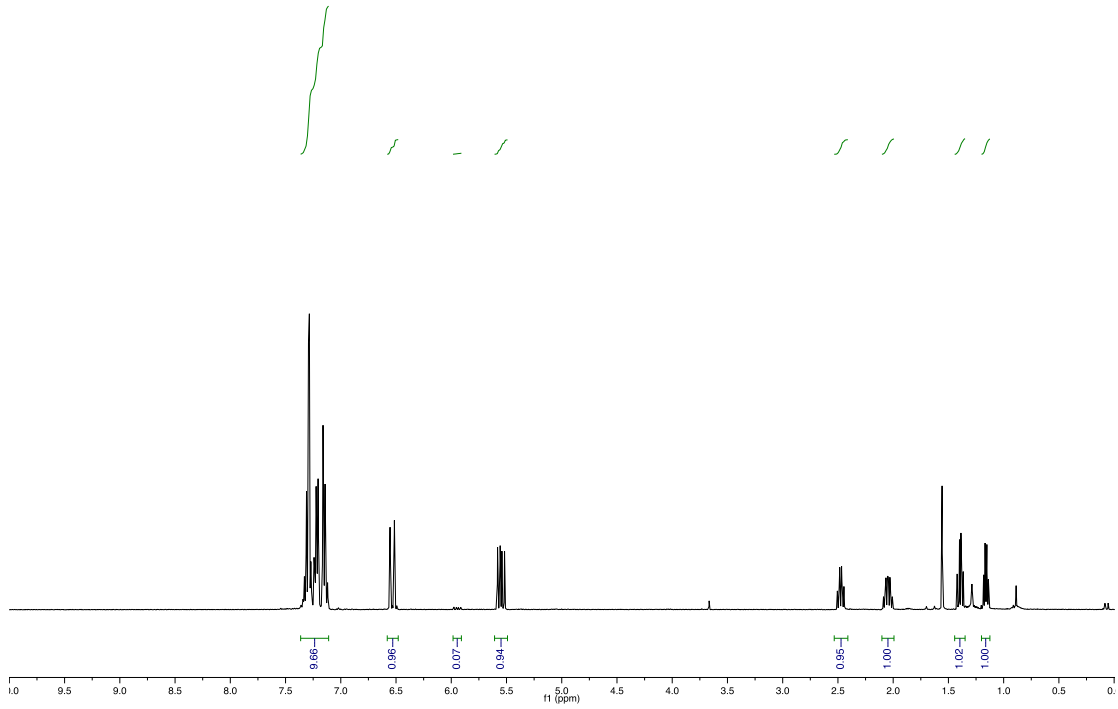

ph246.12.fid  
 ResearchGroup.Echavarren  
 ICIQ\_13C1HJ512s CDCI3 /opt/topspin pholstein 31

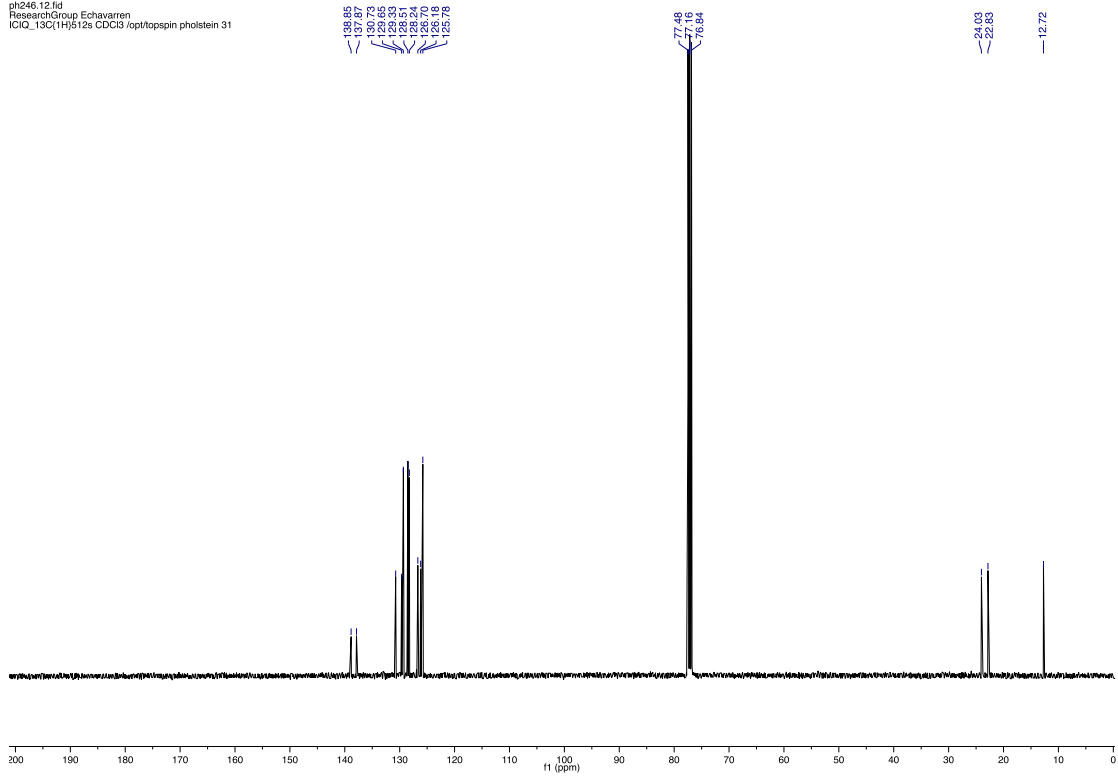

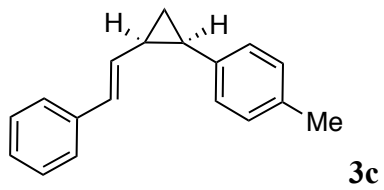

ph252-1.10.fid  
 ResearchGroup Echavarren  
 ICIQ\_1H12p8s CDC13 /opt/topspin pholstein 25

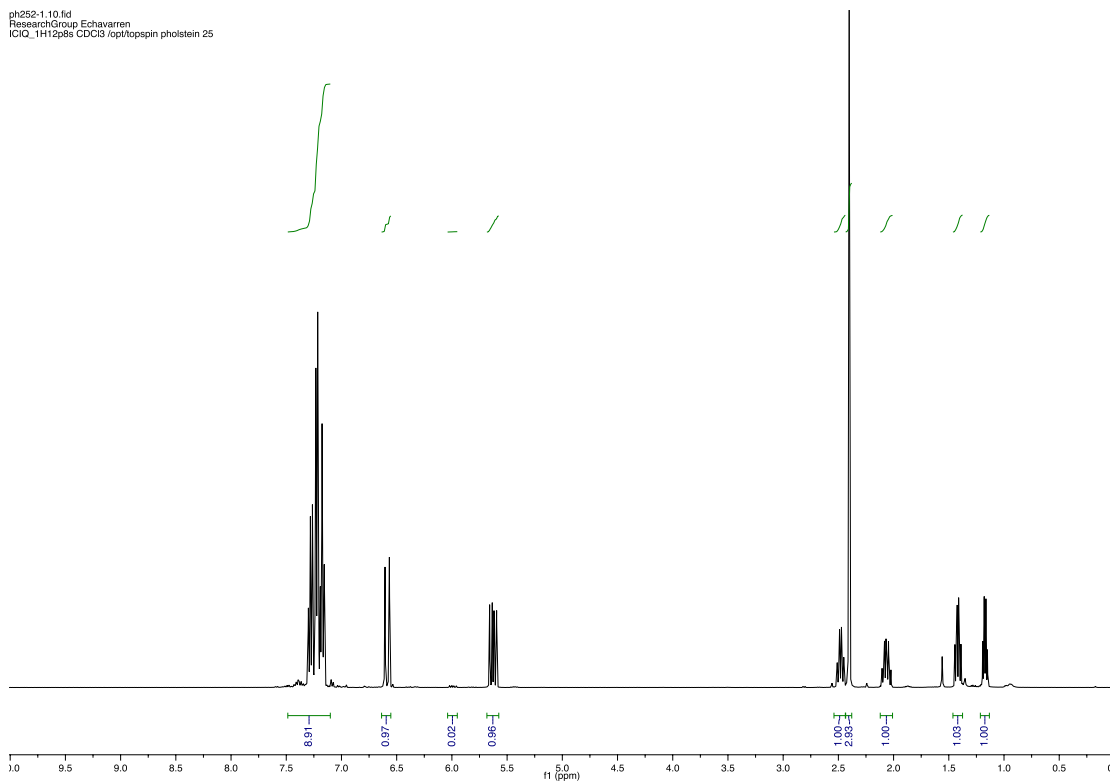

ph252-1.11.fid  
 ResearchGroup Echavarren  
 ICIQ\_13C1H1128s CDC13 /opt/topspin pholstein 25

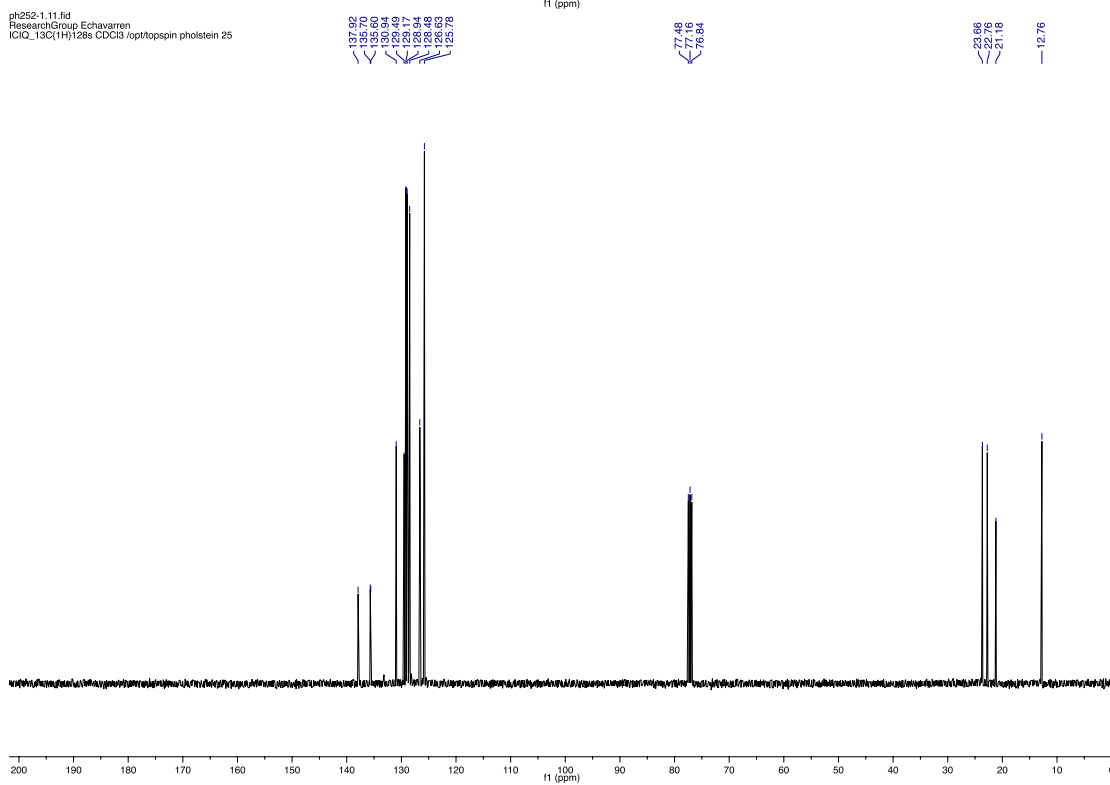



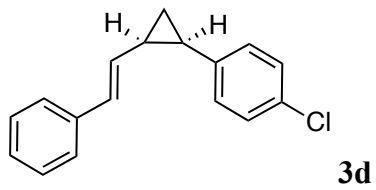

ph252-2.10.fid  
 ResearchGroup.Echavarren  
 ICIQ\_1H12p8s CDCI3 /opt/topspin pholstein 26

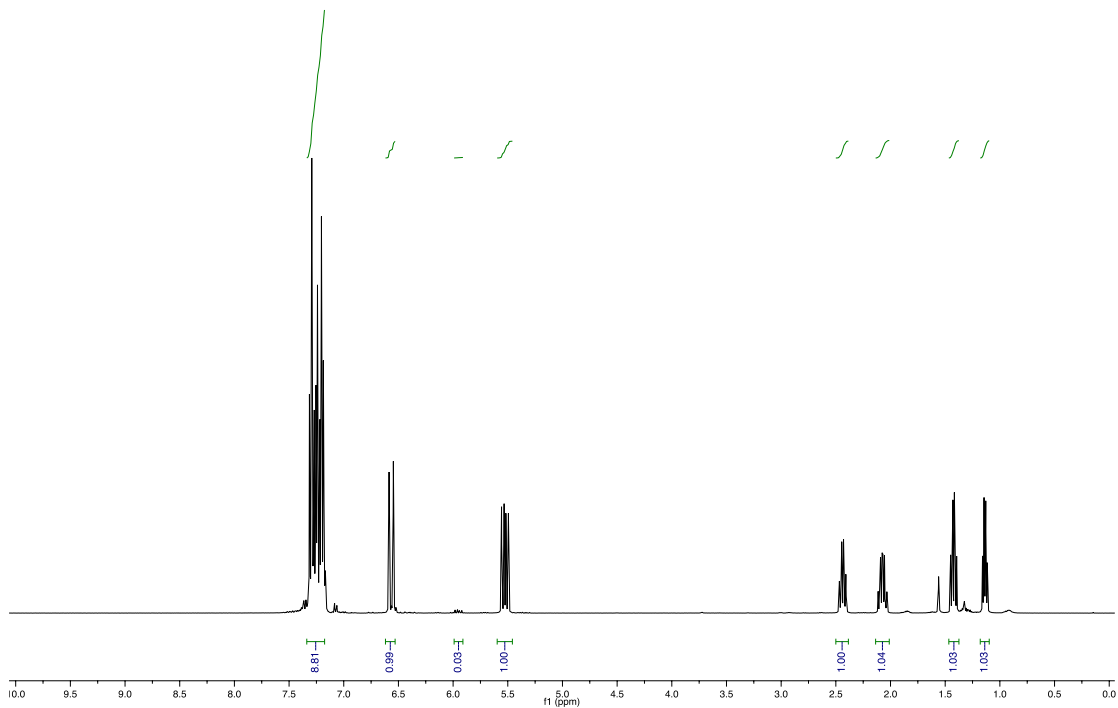

ph252-2.11.fid  
 ResearchGroup.Echavarren  
 ICIQ\_13C1H12p8s CDCI3 /opt/topspin pholstein 26

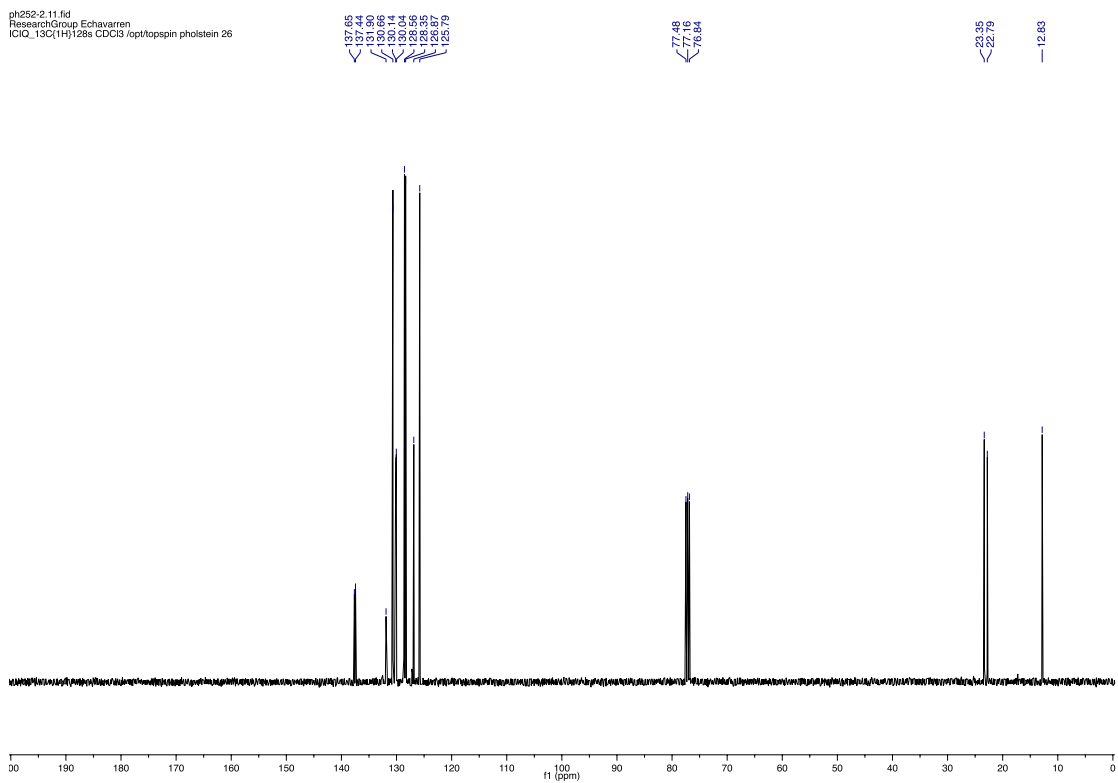

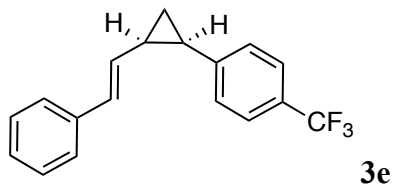

ph250-2.10.fid  
 ResearchGroup.Echavarren  
 ICIQ\_1H12p8s CDCI3 /opt/topspin pholstein 26

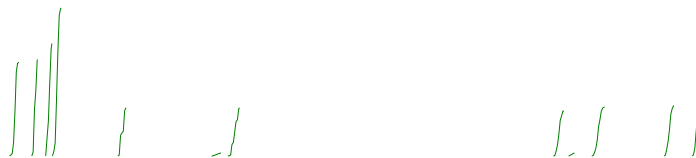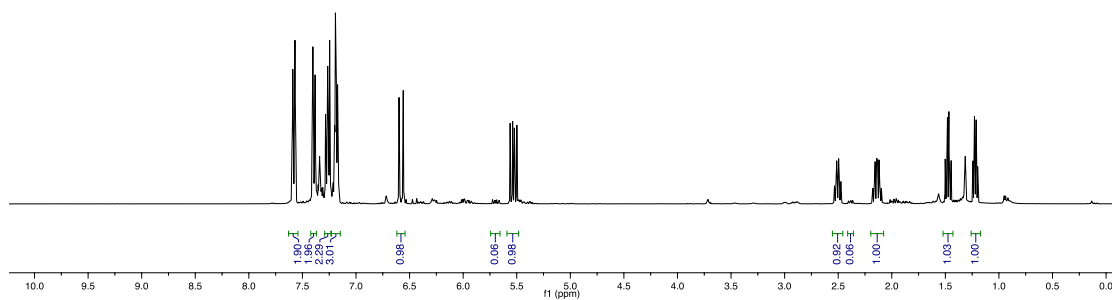

ph250-2.12.fid  
 ResearchGroup.Echavarren  
 ICIQ\_13C1H512s CDCI3 (C)Bruker/TopSpin3.1 pholstein 26

143.24  
 137.52  
 136.52  
 129.90  
 129.47  
 129.05  
 128.62  
 128.19  
 127.77  
 126.30  
 125.82  
 125.13  
 122.70  
 119.10  
 77.88 CDCl3  
 77.00 CDCl3  
 76.74 CDCl3  
 29.04  
 23.26  
 12.95

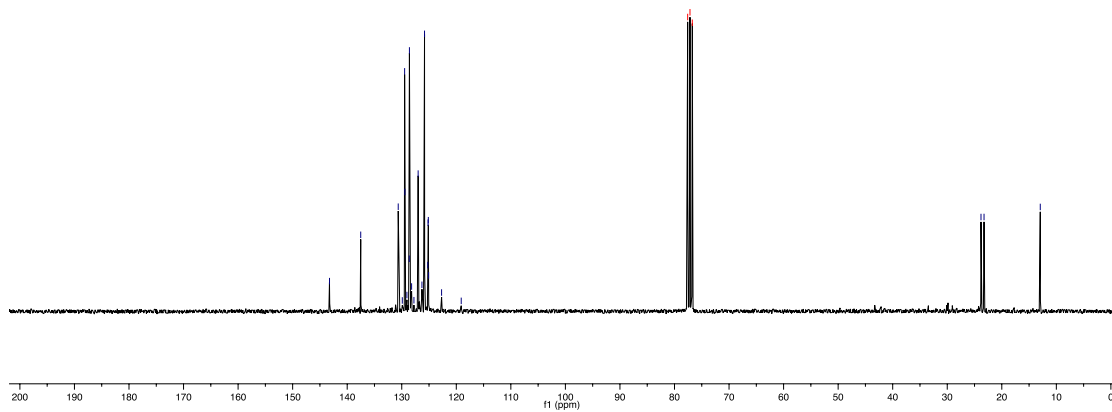

ph250-2\_13.fid  
ResearchGroup\_Echavarren  
ICIQ\_19F(1H) CDCl3 /opt/topspin pholstein 26

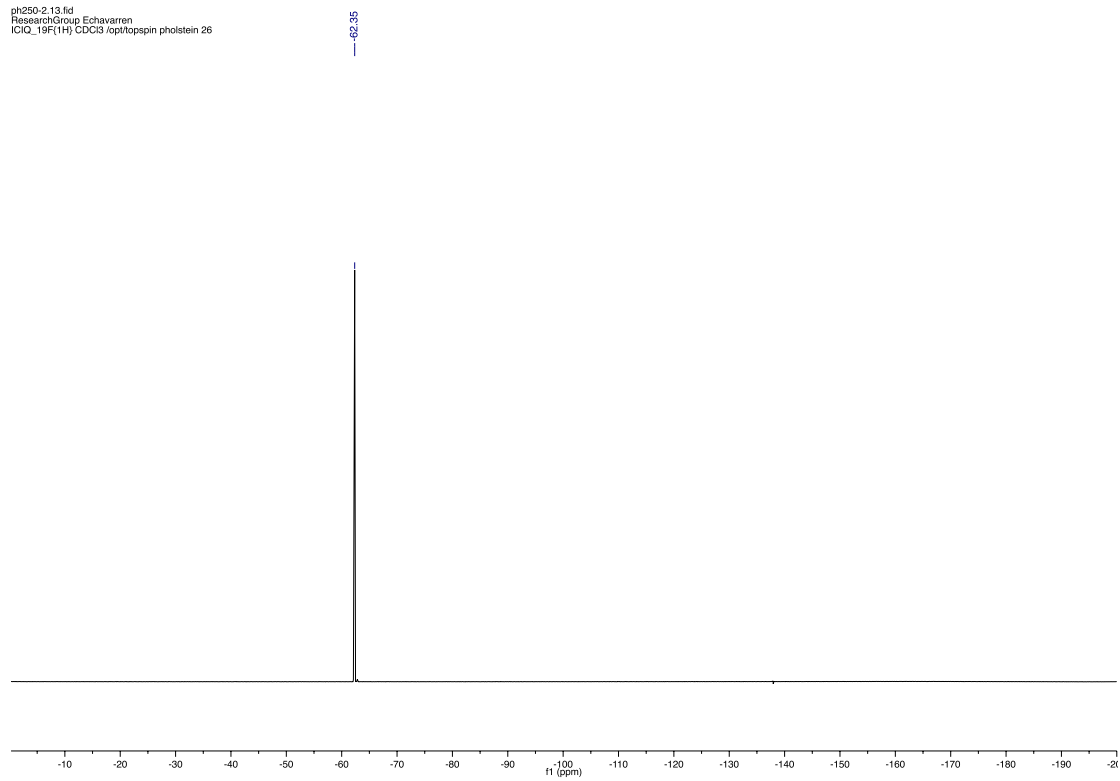

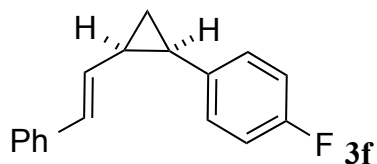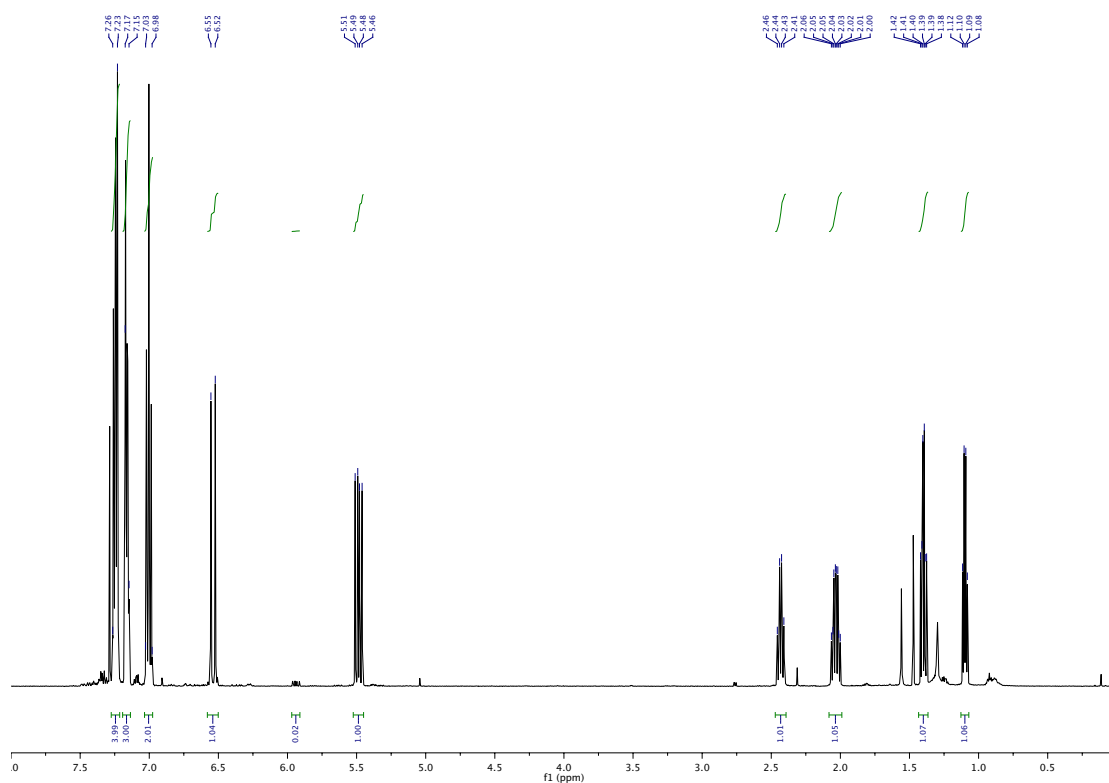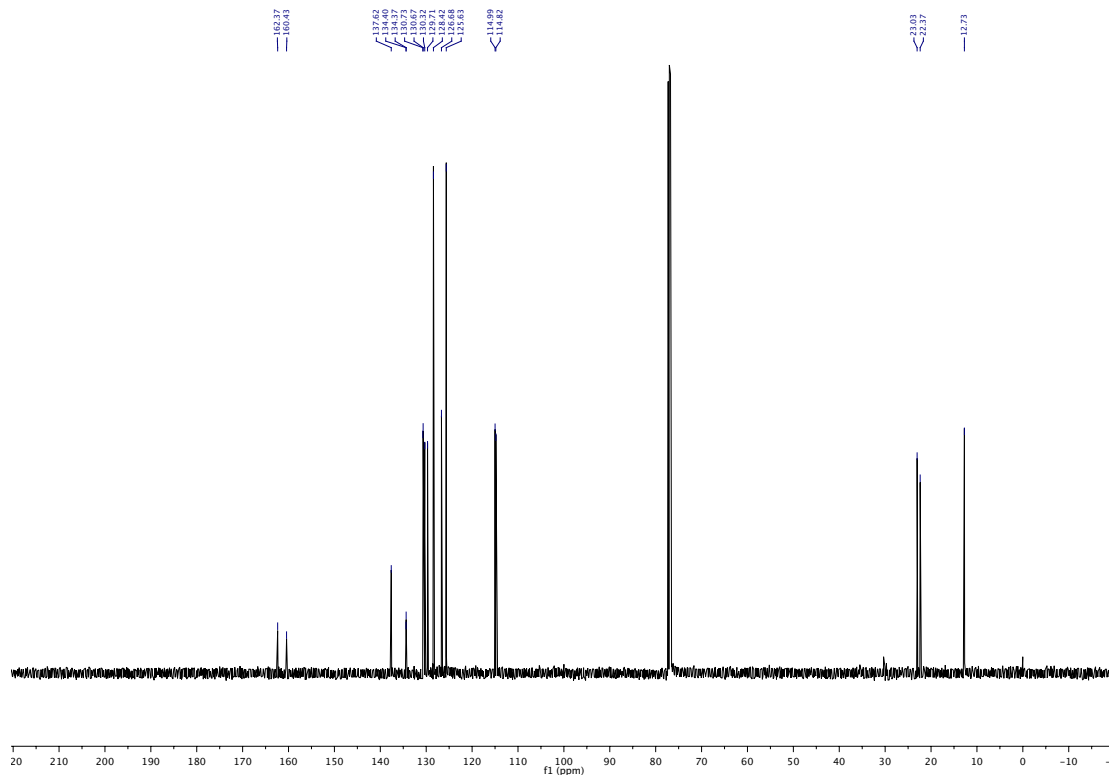

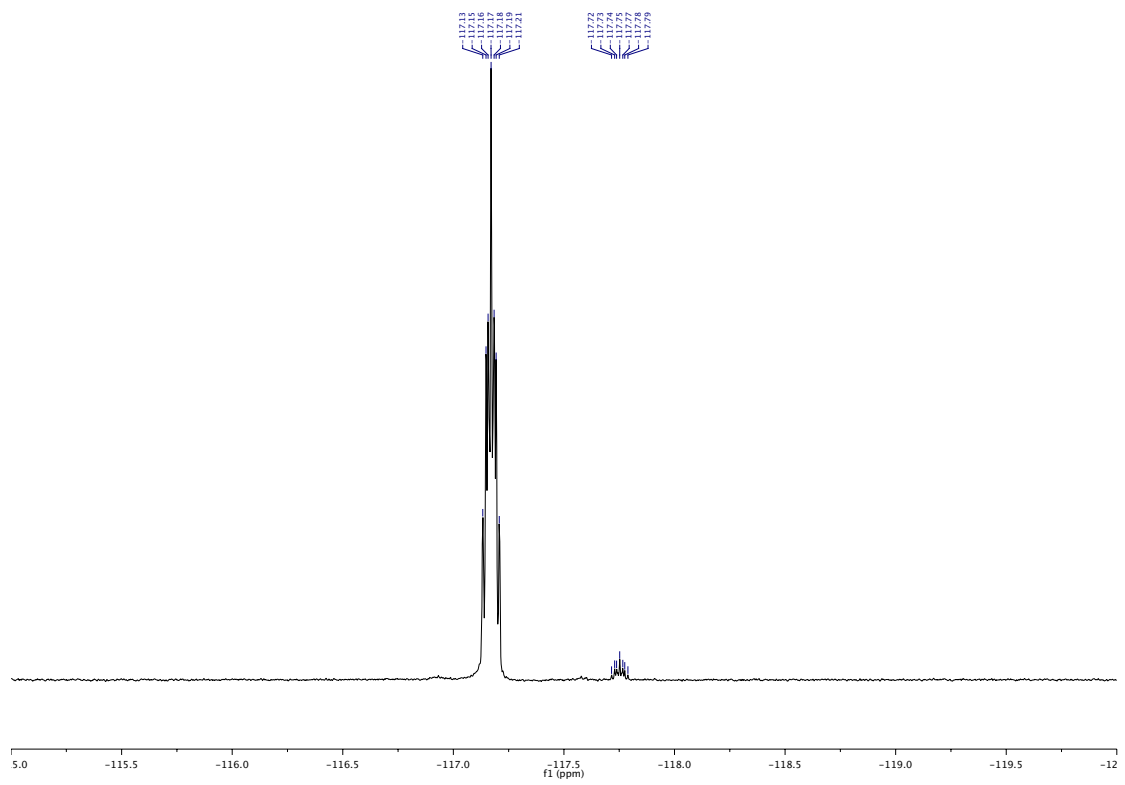

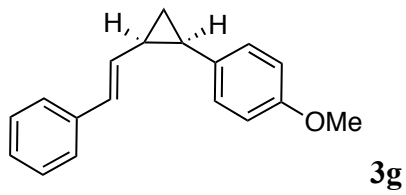

ph271-2.10.fid  
 ResearchGroup Echavarren  
 ICIQ\_1H12p8s CDC13 /opt/topspin pholstein 28

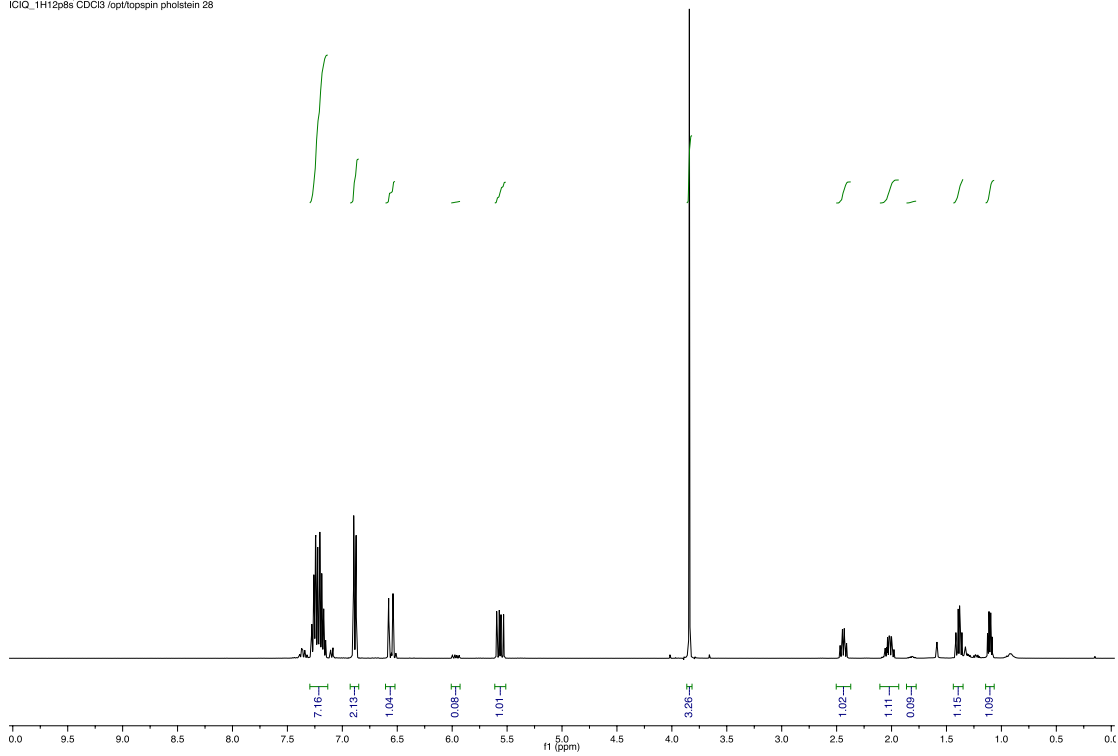

ph271-2.12.fid  
 ResearchGroup Echavarren  
 ICIQ\_13C1H1512s CDC13 /opt/topspin pholstein 30

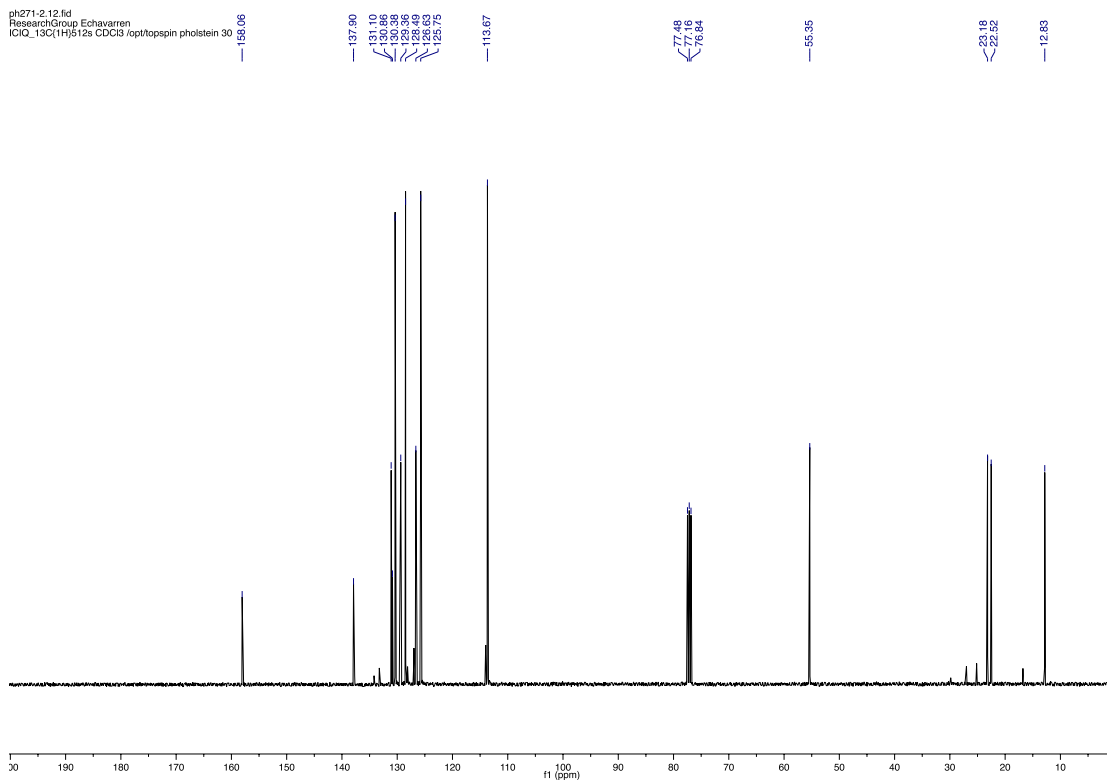

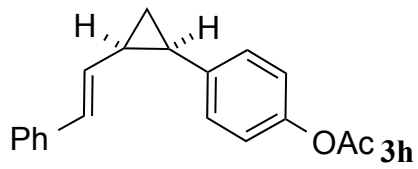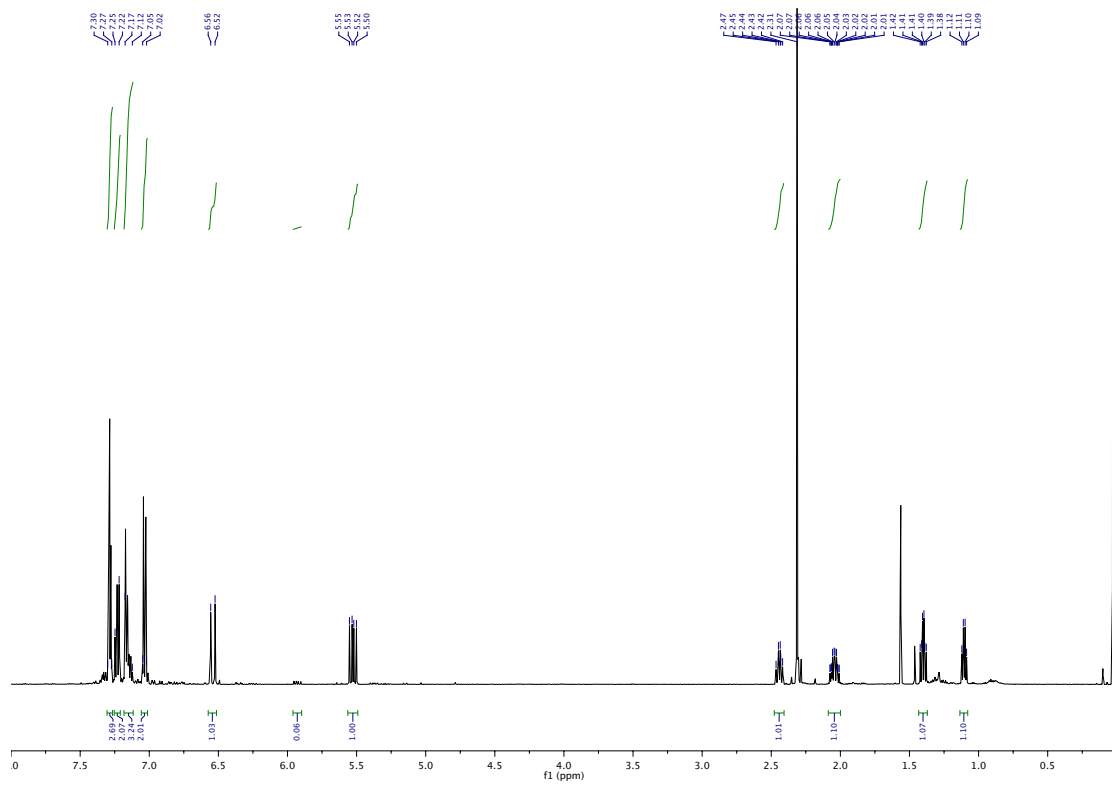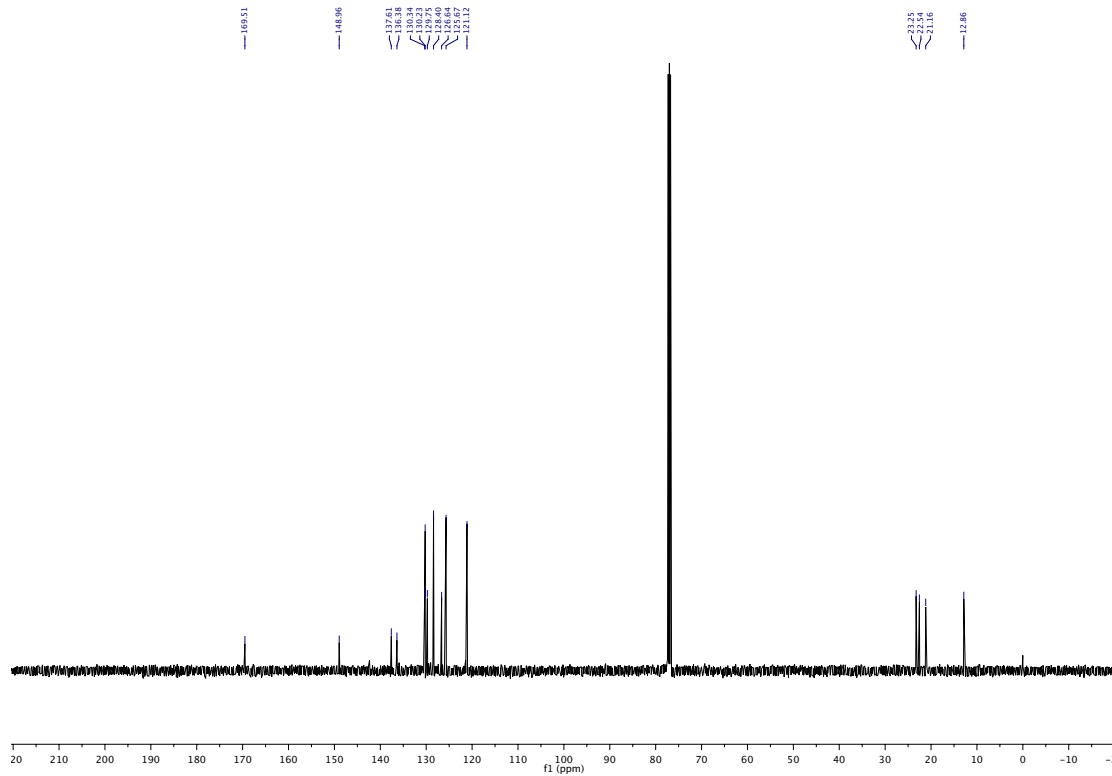

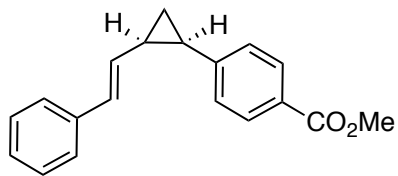

ph275-2f2.10.fid  
 ResearchGroup Echavarren  
 IC10\_1H12986 CDCl3 (ppm) pholstein 27

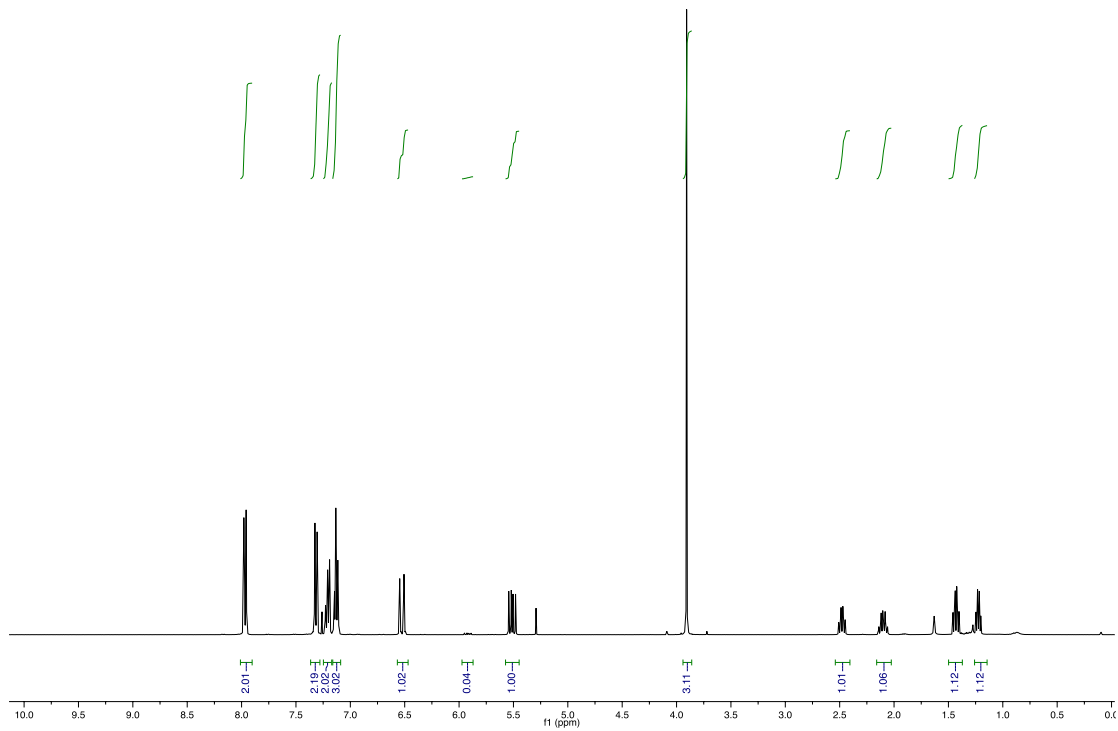

ph275-2f2.12.fid  
 ResearchGroup Echavarren  
 IC10\_13C1H512s CDCl3 (C)BrukerTopSpin 3.1 pholstein 27

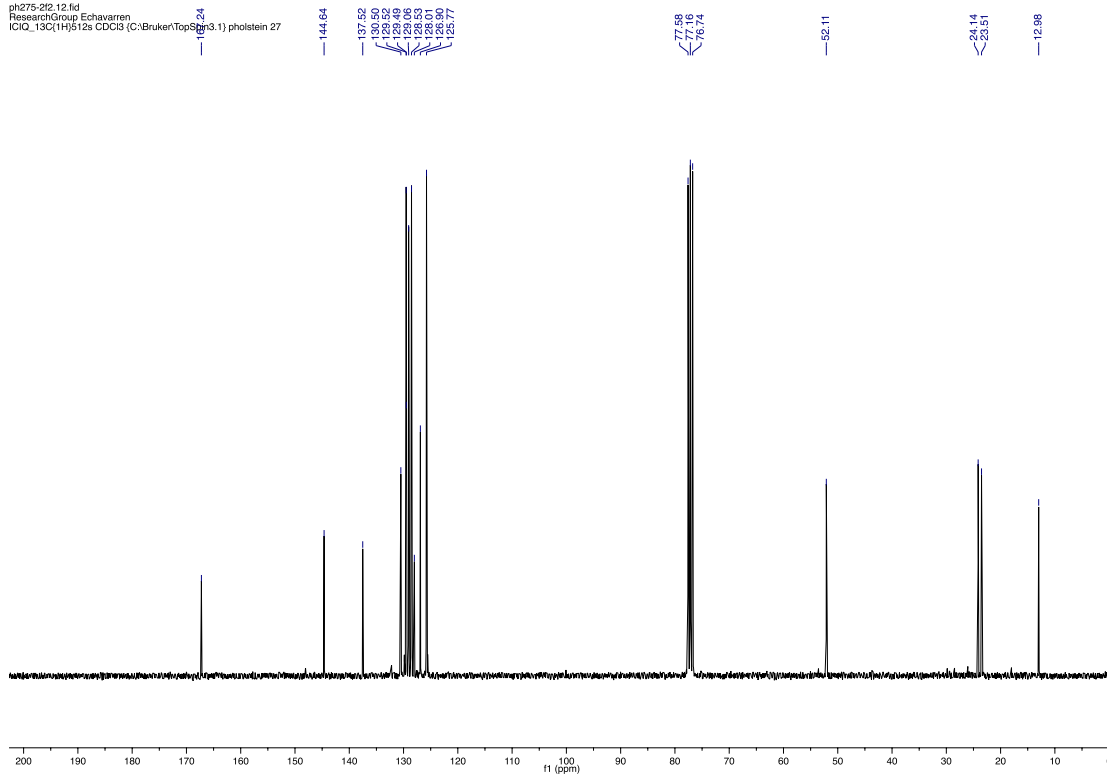



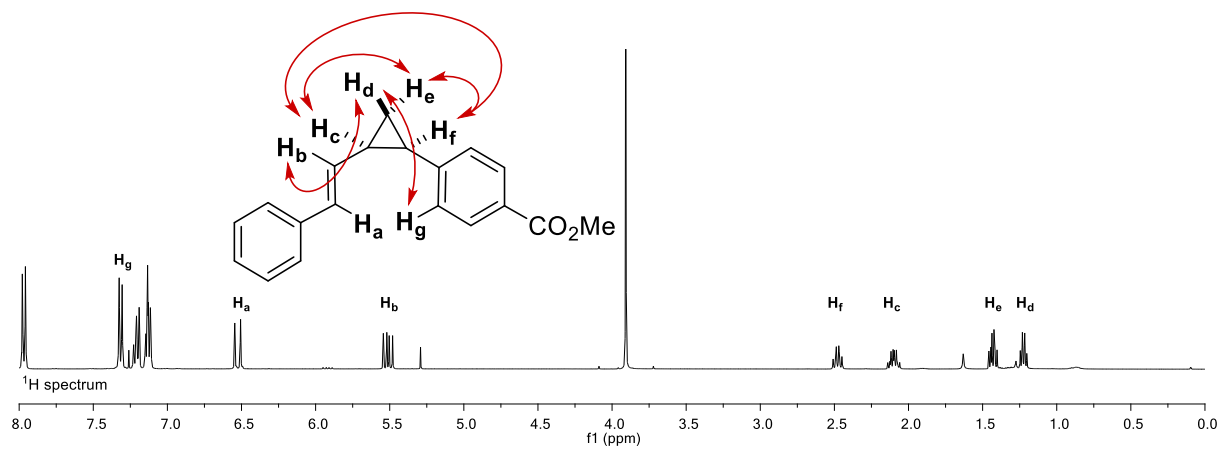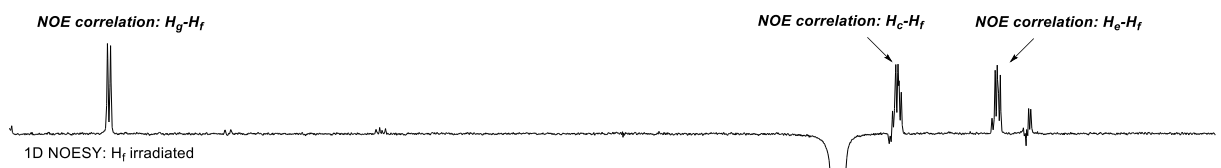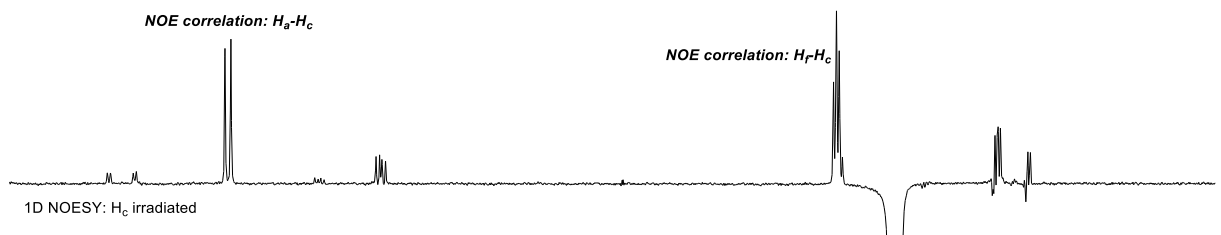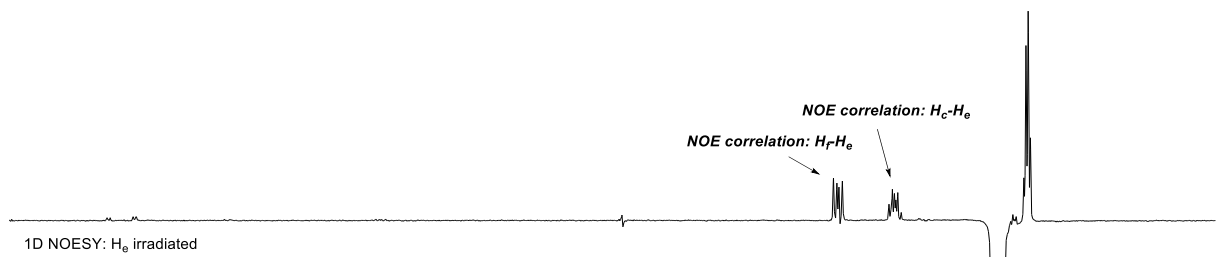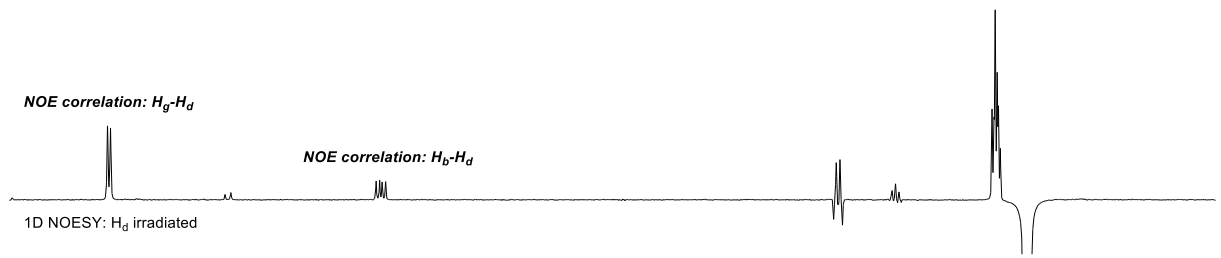



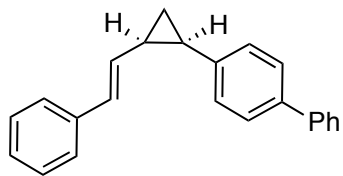

**3k**

ph266-1.10.fid  
ResearchGroup\_Echavarren  
ICIQ\_1H12p3s CDCl3 /opt/topspin pholstein 71

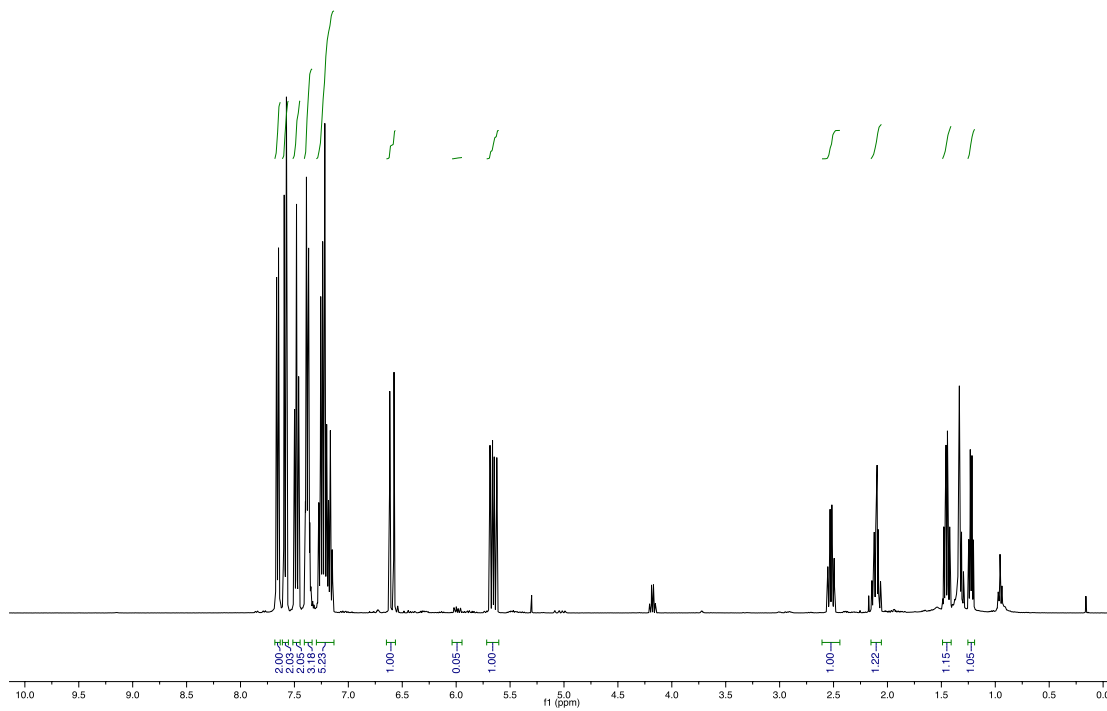

ph266-1.11.fid  
ResearchGroup\_Echavarren  
ICIQ\_13C1H512s CDCl3 /opt/topspin pholstein 71

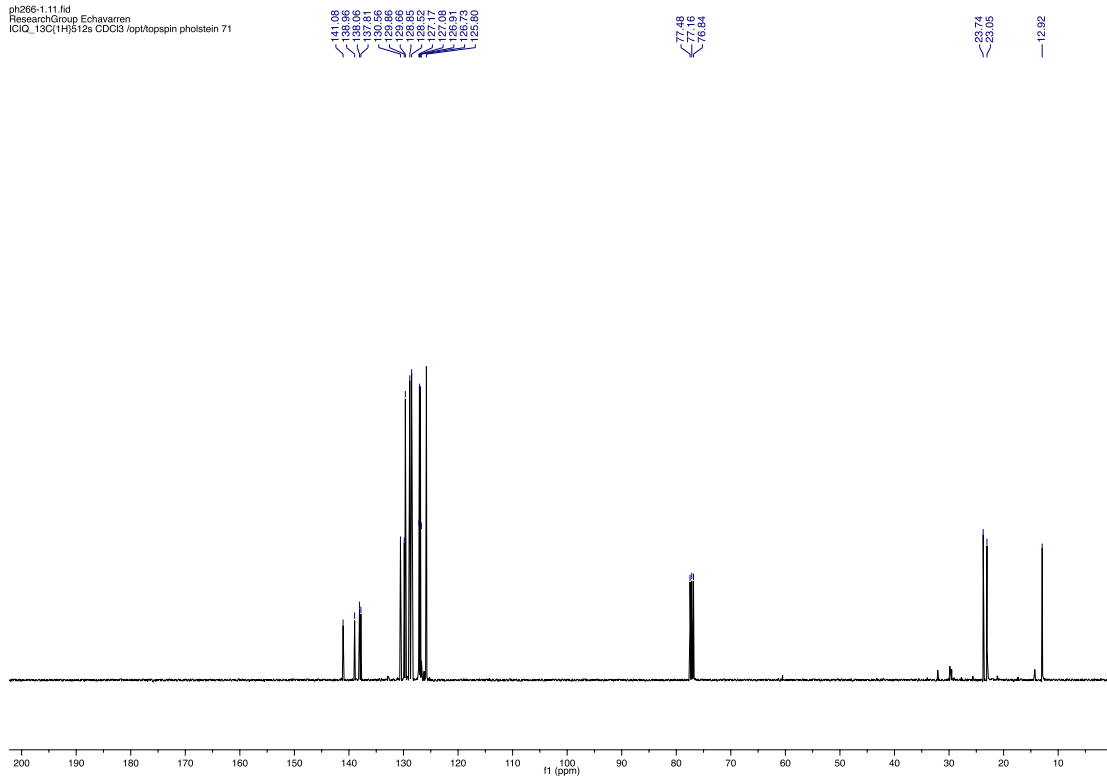



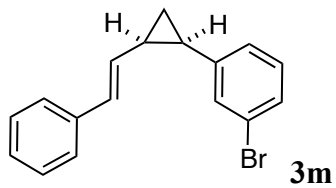

ph250-1.9.fid  
 ResearchGroup Echavarren  
 ICIO\_1H12p8s CDC3 /opt/topspin photstein 25

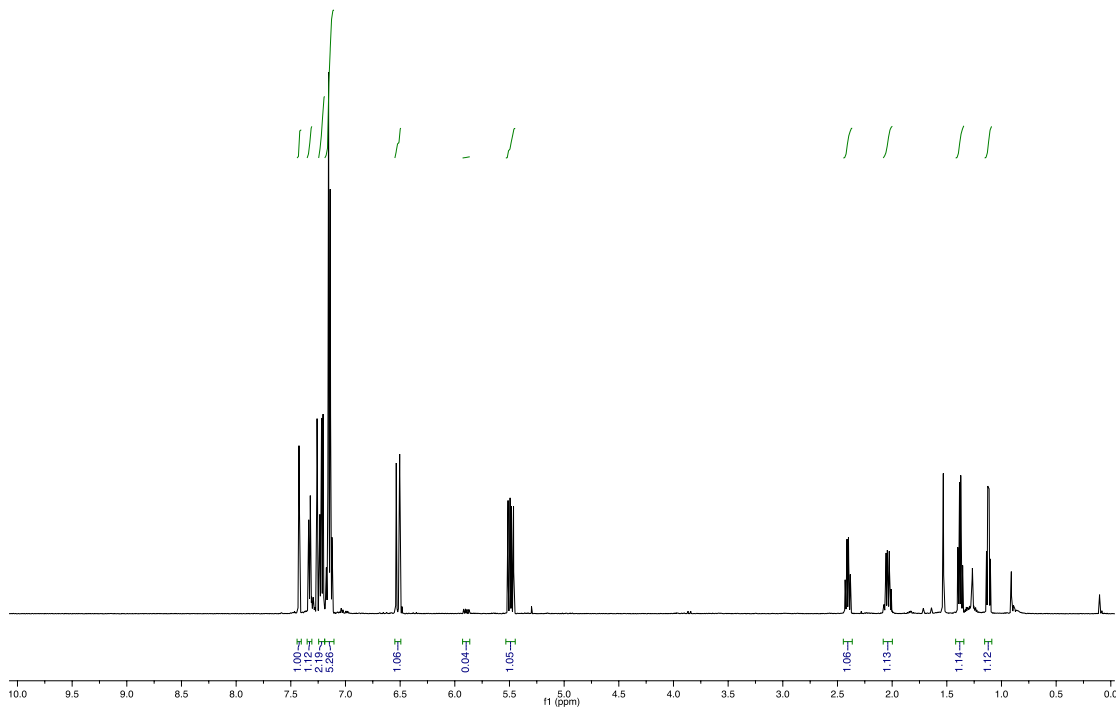

ph250-1.2.fid  
 13C(1H) Experiment

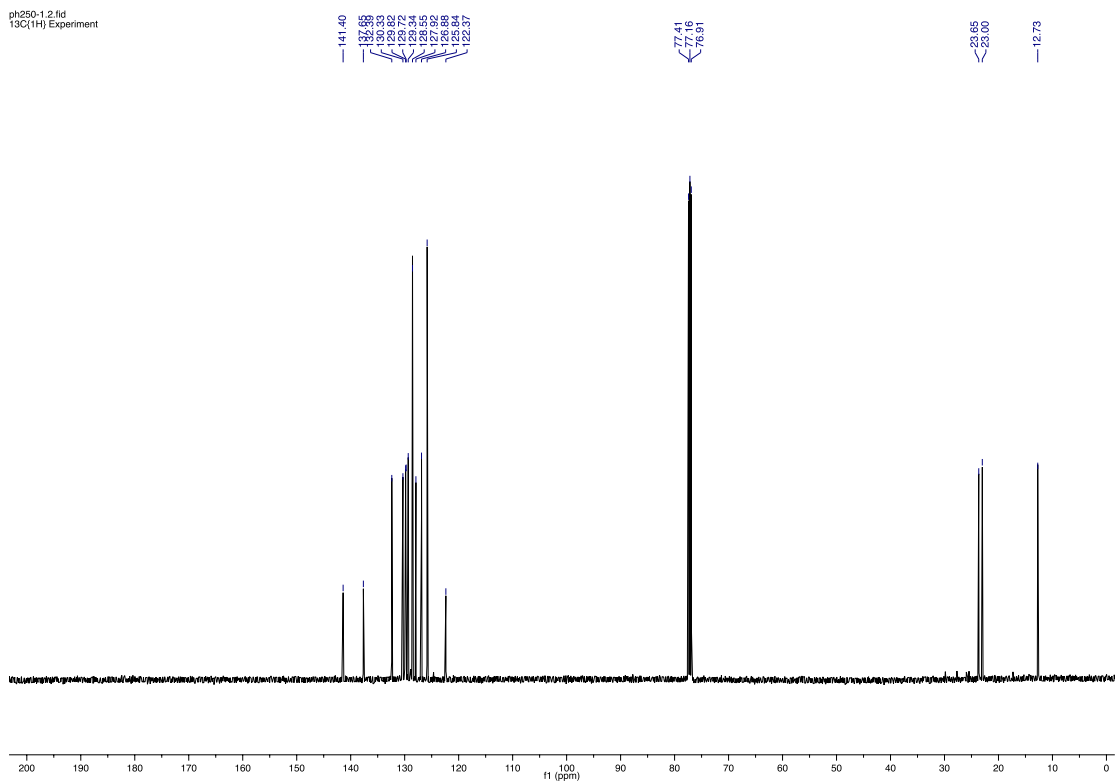

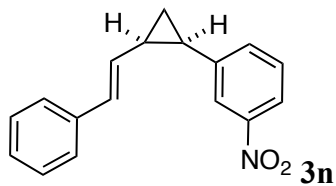

ph370-f1\_10.fid  
 ResearchGroup Echavarren  
 ICIO\_1H12988 CDCl3 /opt/topspin pholstein 32

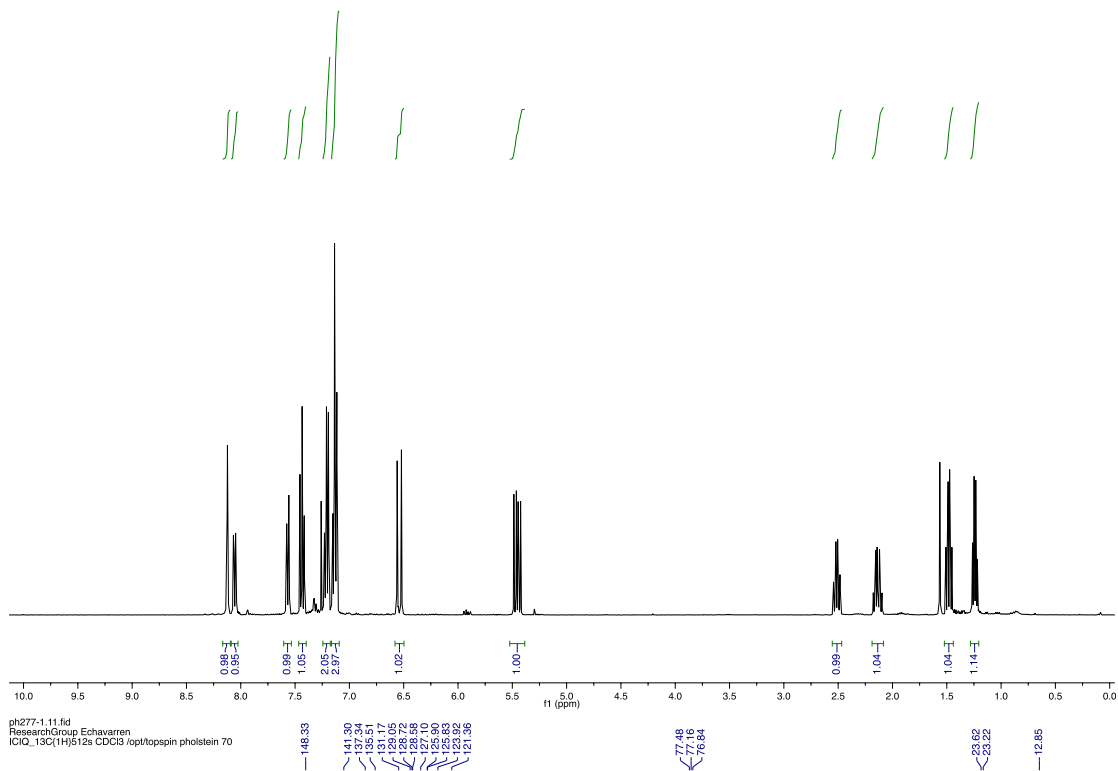

ph277-1.11.fid  
 ResearchGroup Echavarren  
 ICIO\_13C1H1512s CDCl3 /opt/topspin pholstein 70

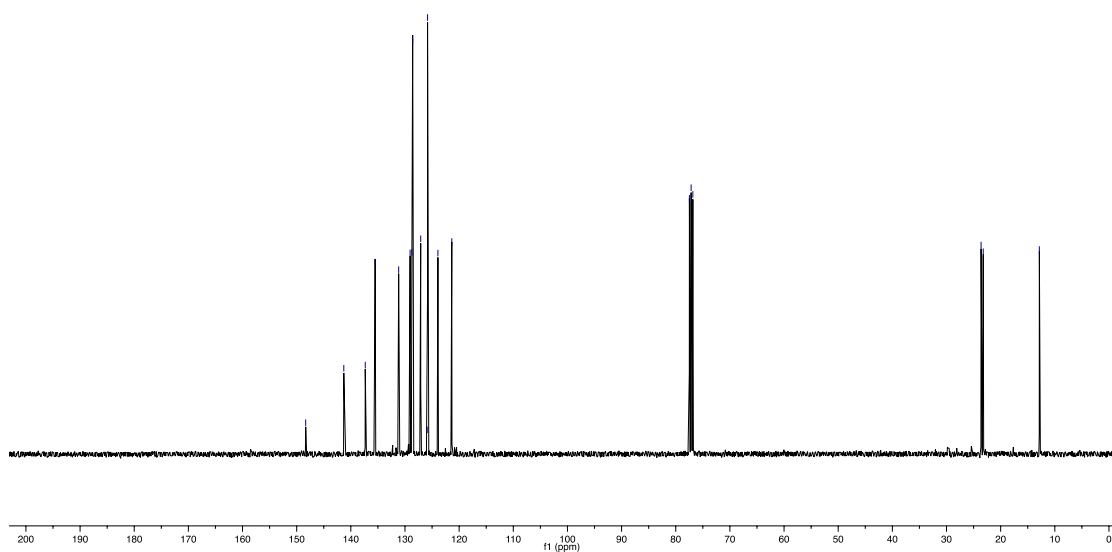

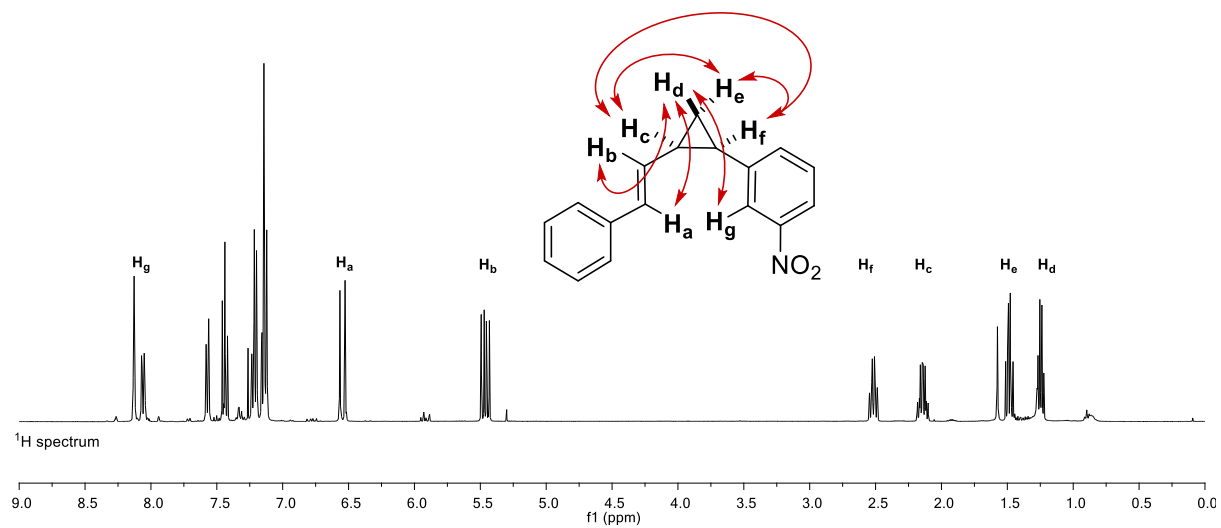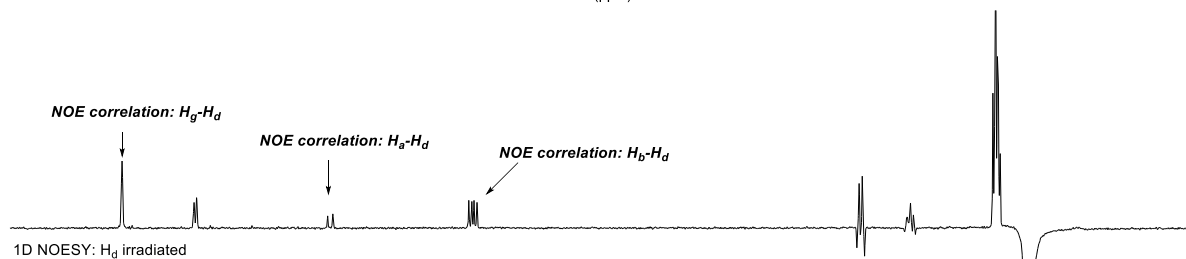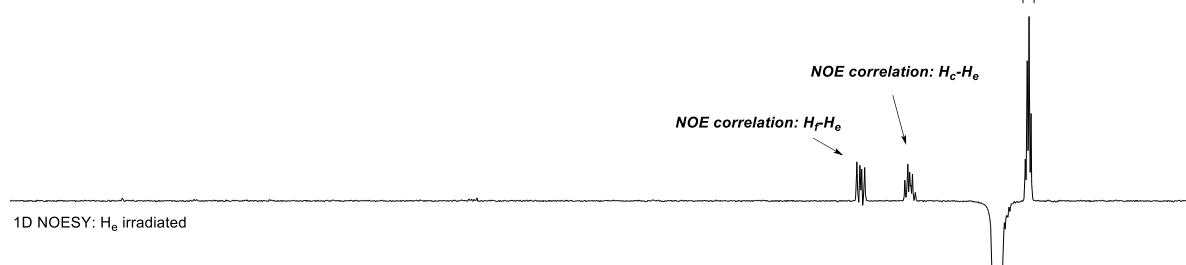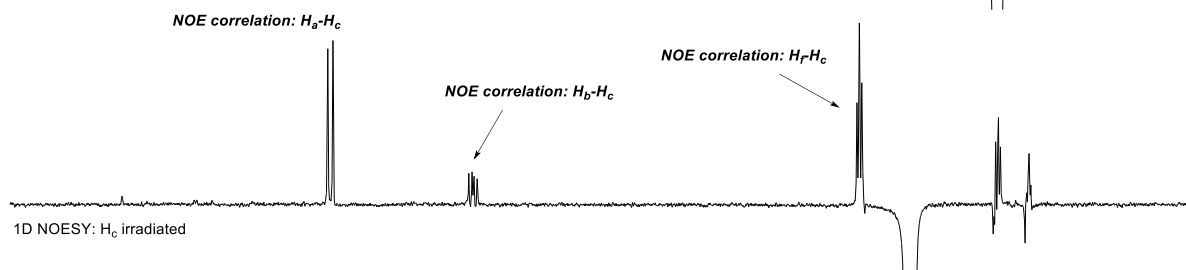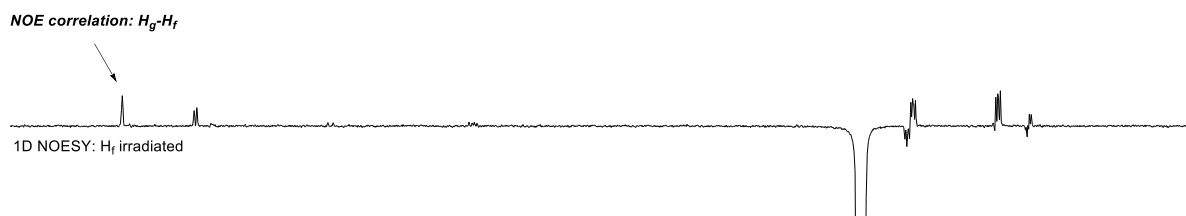

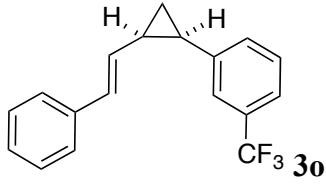

Chemical shift data (ppm) for the <sup>1</sup>H NMR spectrum:

- 7.51, 7.50, 7.49, 7.48, 7.47, 7.46, 7.45, 7.44, 7.43, 7.42, 7.41, 7.40, 7.39, 7.38, 7.37, 7.36, 7.35, 7.34, 7.33, 7.32, 7.31, 7.30, 7.29, 7.28, 7.27, 7.26, 7.25, 7.24, 7.23, 7.22, 7.21, 7.20, 7.19, 7.18, 7.17, 7.16, 7.15, 7.14, 7.13, 7.12, 7.11, 7.10, 7.09, 7.08, 7.07, 7.06, 7.05, 7.04, 7.03, 7.02, 7.01, 7.00, 6.99, 6.98, 6.97, 6.96, 6.95, 6.94, 6.93, 6.92, 6.91, 6.90, 6.89, 6.88, 6.87, 6.86, 6.85, 6.84, 6.83, 6.82, 6.81, 6.80, 6.79, 6.78, 6.77, 6.76, 6.75, 6.74, 6.73, 6.72, 6.71, 6.70, 6.69, 6.68, 6.67, 6.66, 6.65, 6.64, 6.63, 6.62, 6.61, 6.60, 6.59, 6.58, 6.57, 6.56, 6.55, 6.54, 6.53, 6.52, 6.51, 6.50, 6.49, 6.48, 6.47, 6.46, 6.45, 6.44, 6.43, 6.42, 6.41, 6.40, 6.39, 6.38, 6.37, 6.36, 6.35, 6.34, 6.33, 6.32, 6.31, 6.30, 6.29, 6.28, 6.27, 6.26, 6.25, 6.24, 6.23, 6.22, 6.21, 6.20, 6.19, 6.18, 6.17, 6.16, 6.15, 6.14, 6.13, 6.12, 6.11, 6.10, 6.09, 6.08, 6.07, 6.06, 6.05, 6.04, 6.03, 6.02, 6.01, 6.00, 5.99, 5.98, 5.97, 5.96, 5.95, 5.94, 5.93, 5.92, 5.91, 5.90, 5.89, 5.88, 5.87, 5.86, 5.85, 5.84, 5.83, 5.82, 5.81, 5.80, 5.79, 5.78, 5.77, 5.76, 5.75, 5.74, 5.73, 5.72, 5.71, 5.70, 5.69, 5.68, 5.67, 5.66, 5.65, 5.64, 5.63, 5.62, 5.61, 5.60, 5.59, 5.58, 5.57, 5.56, 5.55, 5.54, 5.53, 5.52, 5.51, 5.50, 5.49, 5.48, 5.47, 5.46, 5.45, 5.44, 5.43, 5.42, 5.41, 5.40, 5.39, 5.38, 5.37, 5.36, 5.35, 5.34, 5.33, 5.32, 5.31, 5.30, 5.29, 5.28, 5.27, 5.26, 5.25, 5.24, 5.23, 5.22, 5.21, 5.20, 5.19, 5.18, 5.17, 5.16, 5.15, 5.14, 5.13, 5.12, 5.11, 5.10, 5.09, 5.08, 5.07, 5.06, 5.05, 5.04, 5.03, 5.02, 5.01, 5.00, 4.99, 4.98, 4.97, 4.96, 4.95, 4.94, 4.93, 4.92, 4.91, 4.90, 4.89, 4.88, 4.87, 4.86, 4.85, 4.84, 4.83, 4.82, 4.81, 4.80, 4.79, 4.78, 4.77, 4.76, 4.75, 4.74, 4.73, 4.72, 4.71, 4.70, 4.69, 4.68, 4.67, 4.66, 4.65, 4.64, 4.63, 4.62, 4.61, 4.60, 4.59, 4.58, 4.57, 4.56, 4.55, 4.54, 4.53, 4.52, 4.51, 4.50, 4.49, 4.48, 4.47, 4.46, 4.45, 4.44, 4.43, 4.42, 4.41, 4.40, 4.39, 4.38, 4.37, 4.36, 4.35, 4.34, 4.33, 4.32, 4.31, 4.30, 4.29, 4.28, 4.27, 4.26, 4.25, 4.24, 4.23, 4.22, 4.21, 4.20, 4.19, 4.18, 4.17, 4.16, 4.15, 4.14, 4.13, 4.12, 4.11, 4.10, 4.09, 4.08, 4.07, 4.06, 4.05, 4.04, 4.03, 4.02, 4.01, 4.00, 3.99, 3.98, 3.97, 3.96, 3.95, 3.94, 3.93, 3.92, 3.91, 3.90, 3.89, 3.88, 3.87, 3.86, 3.85, 3.84, 3.83, 3.82, 3.81, 3.80, 3.79, 3.78, 3.77, 3.76, 3.75, 3.74, 3.73, 3.72, 3.71, 3.70, 3.69, 3.68, 3.67, 3.66, 3.65, 3.64, 3.63, 3.62, 3.61, 3.60, 3.59, 3.58, 3.57, 3.56, 3.55, 3.54, 3.53, 3.52, 3.51, 3.50, 3.49, 3.48, 3.47, 3.46, 3.45, 3.44, 3.43, 3.42, 3.41, 3.40, 3.39, 3.38, 3.37, 3.36, 3.35, 3.34, 3.33, 3.32, 3.31, 3.30, 3.29, 3.28, 3.27, 3.26, 3.25, 3.24, 3.23, 3.22, 3.21, 3.20, 3.19, 3.18, 3.17, 3.16, 3.15, 3.14, 3.13, 3.12, 3.11, 3.10, 3.09, 3.08, 3.07, 3.06, 3.05, 3.04, 3.03, 3.02, 3.01, 3.00, 2.99, 2.98, 2.97, 2.96, 2.95, 2.94, 2.93, 2.92, 2.91, 2.90, 2.89, 2.88, 2.87, 2.86, 2.85, 2.84, 2.83, 2.82, 2.81, 2.80, 2.79, 2.78, 2.77, 2.76, 2.75, 2.74, 2.73, 2.72, 2.71, 2.70, 2.69, 2.68, 2.67, 2.66, 2.65, 2.64, 2.63, 2.62, 2.61, 2.60, 2.59, 2.58, 2.57, 2.56, 2.55, 2.54, 2.53, 2.52, 2.51, 2.50, 2.49, 2.48, 2.47, 2.46, 2.45, 2.44, 2.43, 2.42, 2.41, 2.40, 2.39, 2.38, 2.37, 2.36, 2.35, 2.34, 2.33, 2.32, 2.31, 2.30, 2.29, 2.28, 2.27, 2.26, 2.25, 2.24, 2.23, 2.22, 2.21, 2.20, 2.19, 2.18, 2.17, 2.16, 2.15, 2.14, 2.13, 2.12, 2.11, 2.10, 2.09, 2.08, 2.07, 2.06, 2.05, 2.04, 2.03, 2.02, 2.01, 2.00, 1.99, 1.98, 1.97, 1.96, 1.95, 1.94, 1.93, 1.92, 1.91, 1.90, 1.89, 1.88, 1.87, 1.86, 1.85, 1.84, 1.83, 1.82, 1.81, 1.80, 1.79, 1.78, 1.77, 1.76, 1.75, 1.74, 1.73, 1.72, 1.71, 1.70, 1.69, 1.68, 1.67, 1.66, 1.65, 1.64, 1.63, 1.62, 1.61, 1.60, 1.59, 1.58, 1.57, 1.56, 1.55, 1.54, 1.53, 1.52, 1.51, 1.50, 1.49, 1.48, 1.47, 1.46, 1.45, 1.44, 1.43, 1.42, 1.41, 1.40, 1.39, 1.38, 1.37, 1.36, 1.35, 1.34, 1.33, 1.32, 1.31, 1.30, 1.29, 1.28, 1.27, 1.26, 1.25, 1.24, 1.23, 1.22, 1.21, 1.20, 1.19, 1.18, 1.17, 1.16, 1.15, 1.14, 1.13, 1.12, 1.11, 1.10, 1.09, 1.08, 1.07, 1.06, 1.05, 1.04, 1.03, 1.02, 1.01, 1.00, 0.99, 0.98, 0.97, 0.96, 0.95, 0.94, 0.93, 0.92, 0.91, 0.90, 0.89, 0.88, 0.87, 0.86, 0.85, 0.84, 0.83, 0.82, 0.81, 0.80, 0.79, 0.78, 0.77, 0.76, 0.75, 0.74, 0.73, 0.72, 0.71, 0.70, 0.69, 0.68, 0.67, 0.66, 0.65, 0.64, 0.63, 0.62, 0.61, 0.60, 0.59, 0.58, 0.57, 0.56, 0.55, 0.54, 0.53, 0.52, 0.51, 0.50, 0.49, 0.48, 0.47, 0.46, 0.45, 0.44, 0.43, 0.42, 0.41, 0.40, 0.39, 0.38, 0.37, 0.36, 0.35, 0.34, 0.33, 0.32, 0.31, 0.30, 0.29, 0.28, 0.27, 0.26, 0.25, 0.24, 0.23, 0.22, 0.21, 0.20, 0.19, 0.18, 0.17, 0.16, 0.15, 0.14, 0.13, 0.12, 0.11, 0.10, 0.09, 0.08, 0.07, 0.06, 0.05, 0.04, 0.03, 0.02, 0.01, 0.00

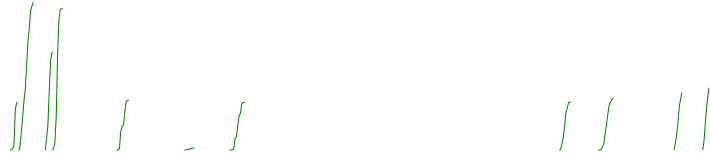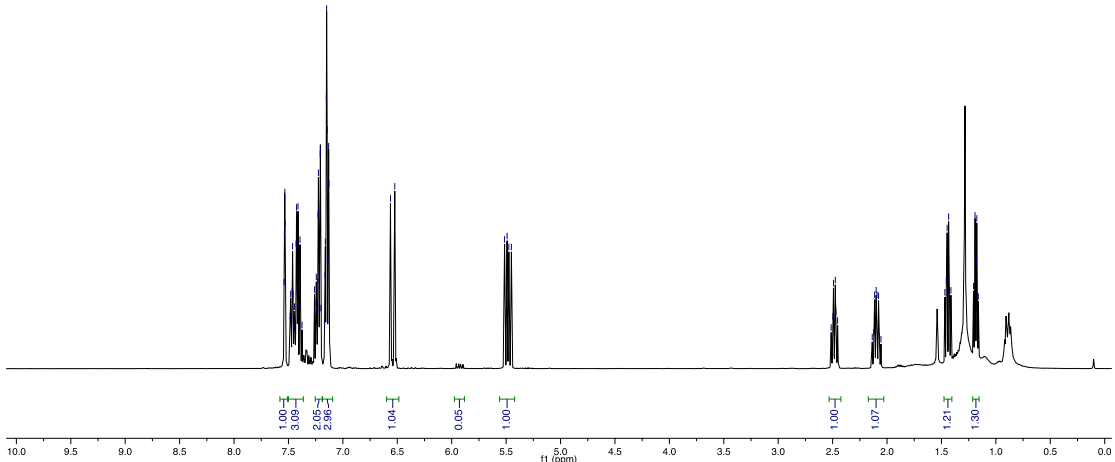

Chemical shift data (ppm) for the <sup>13</sup>C NMR spectrum:

- 146.03, 132.69, 132.68, 132.68, 132.67, 132.66, 130.77, 130.59, 130.13, 129.51, 128.57, 128.55, 128.04, 128.00, 125.82, 123.11, 123.03, 122.99, 77.48, 77.46, 76.84, 29.79, 22.04, 12.80

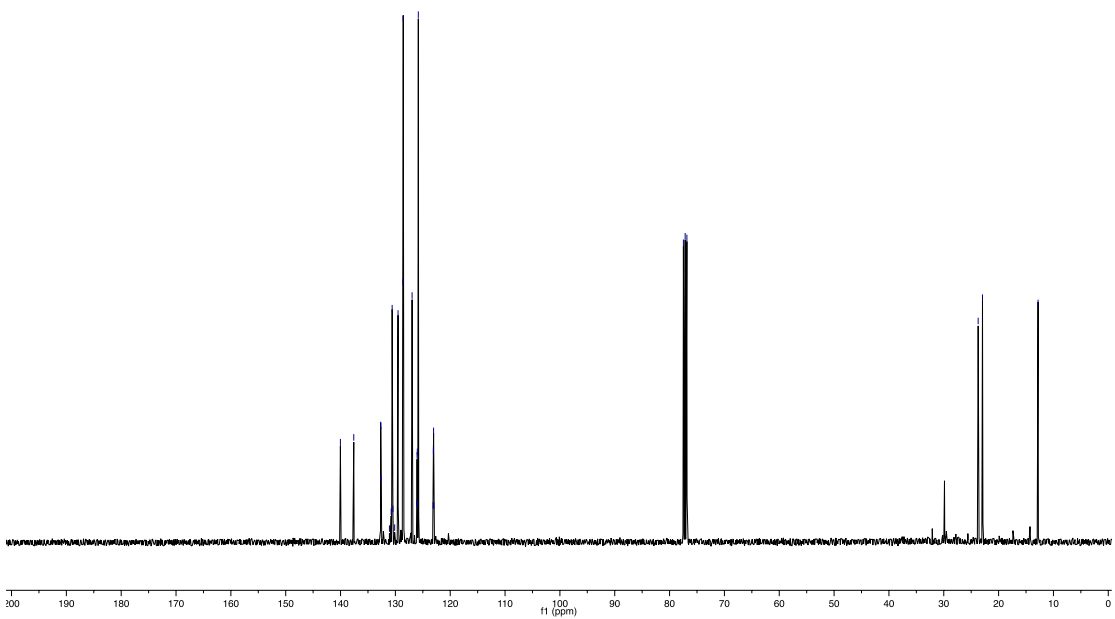



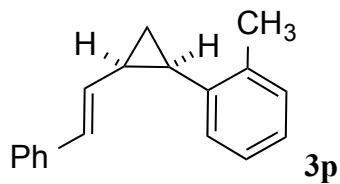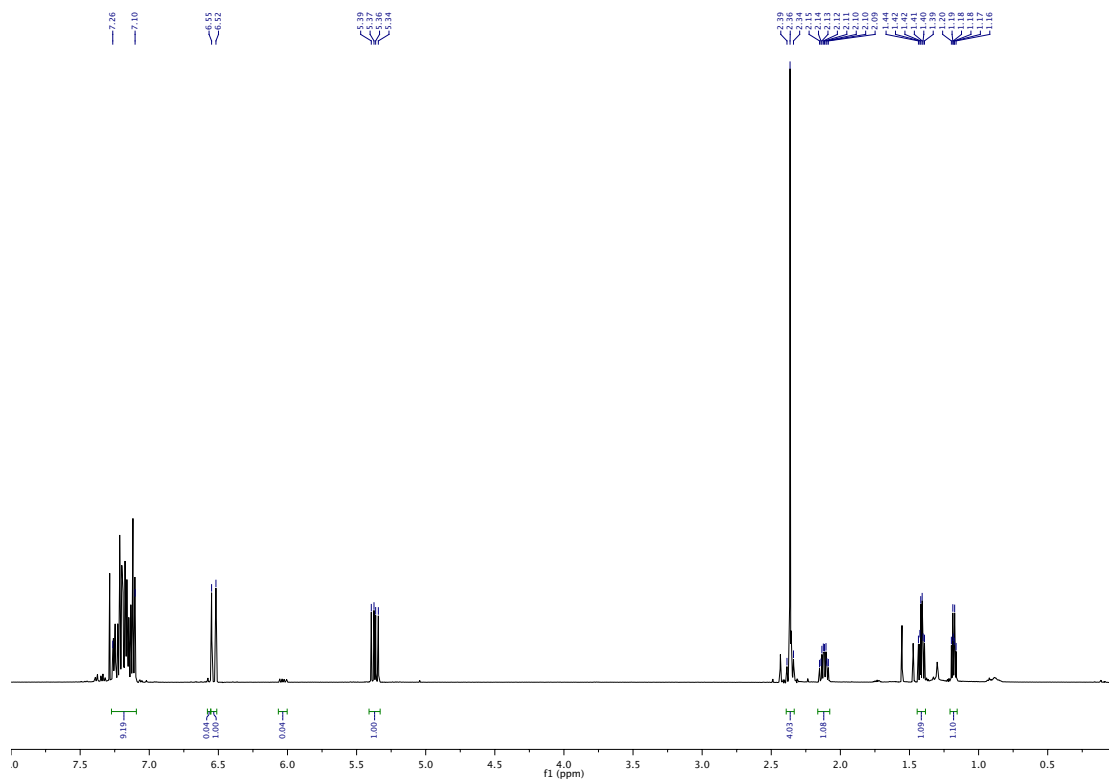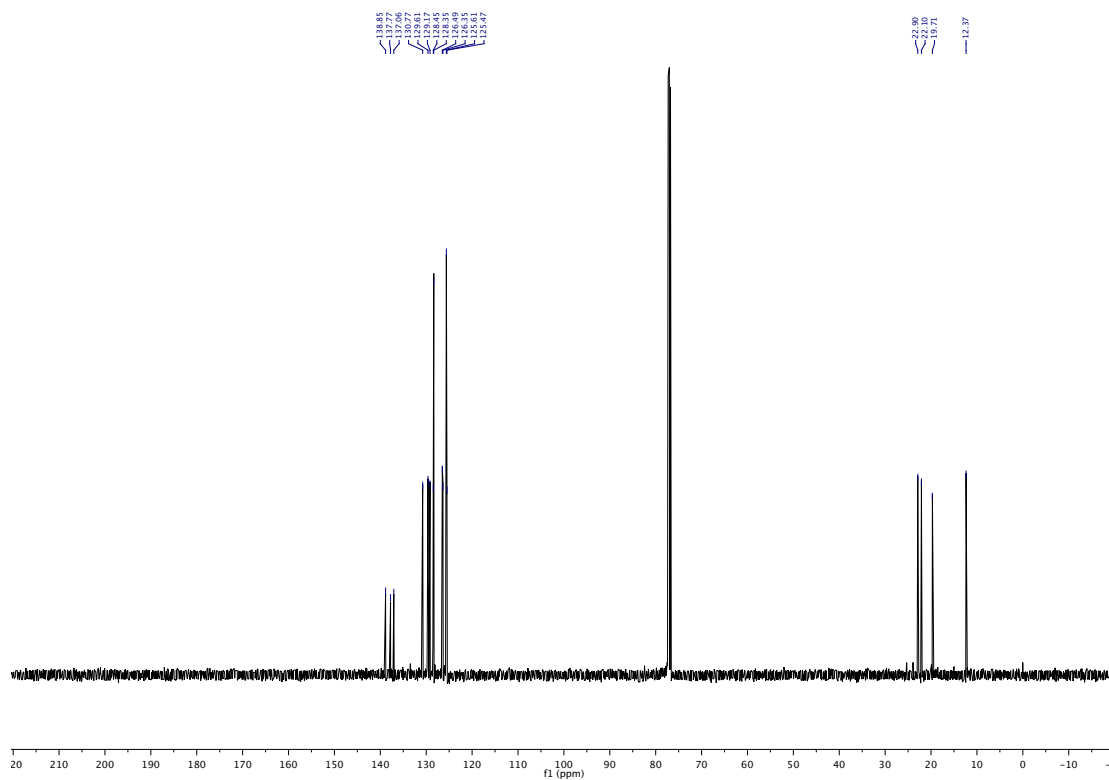

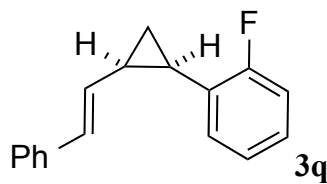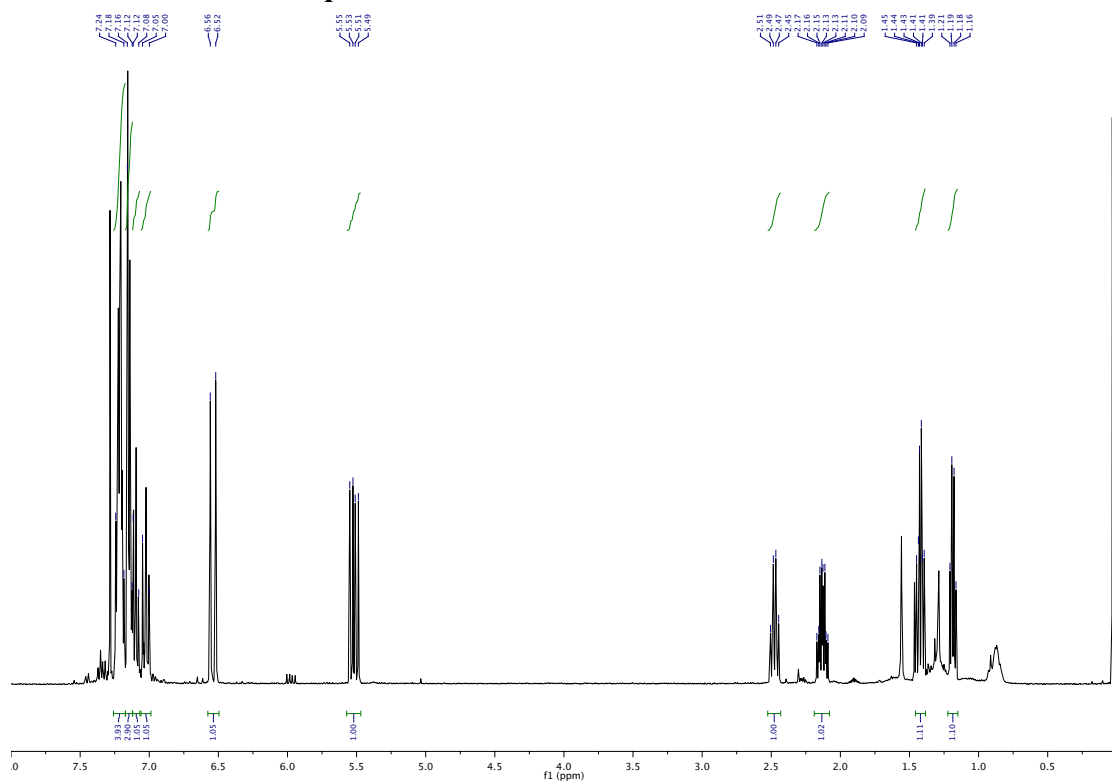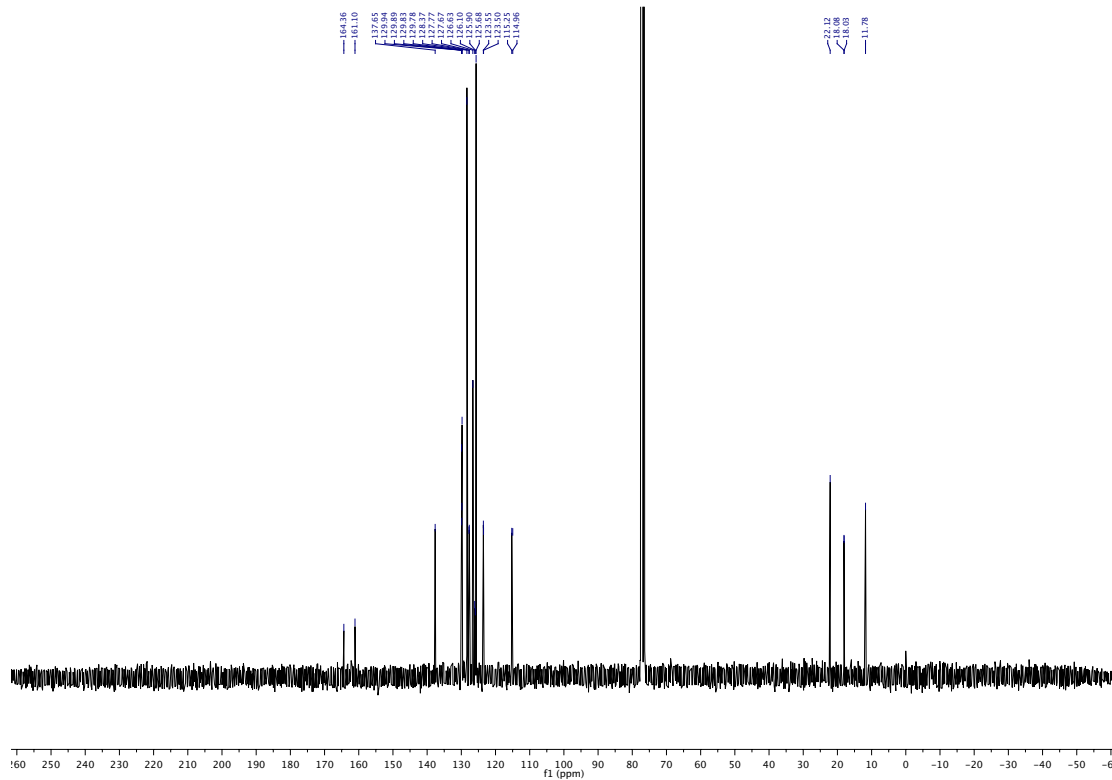

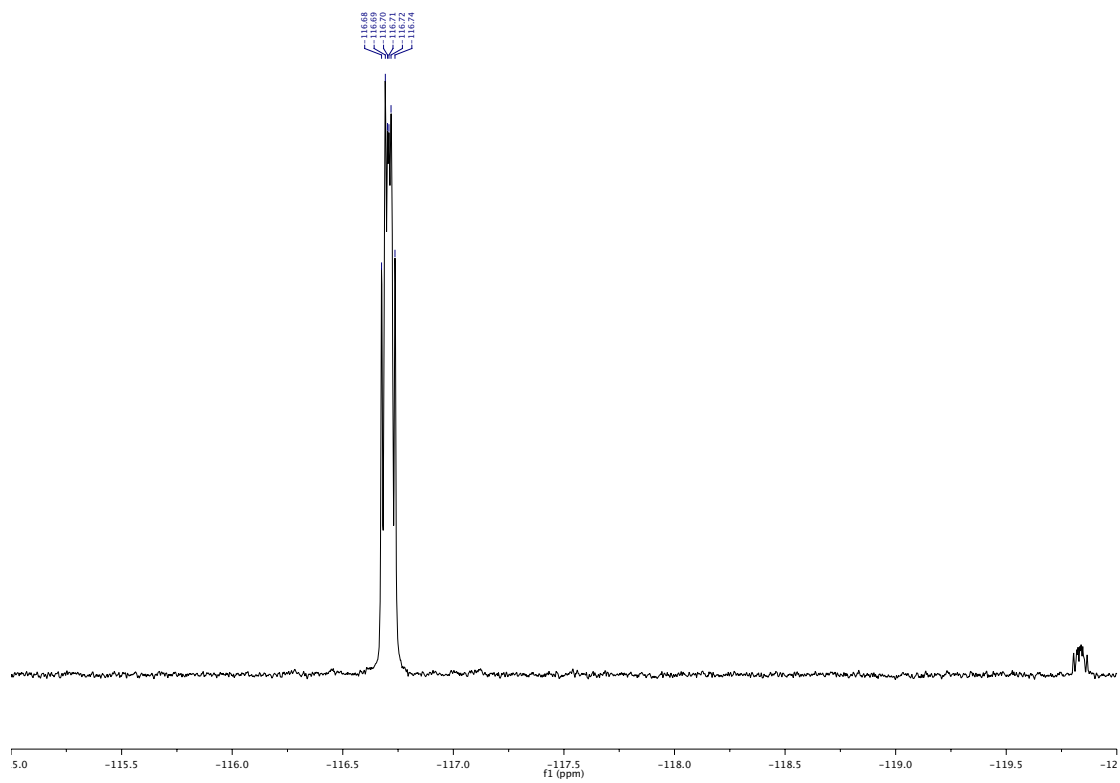

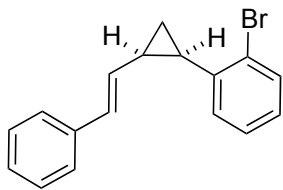

**3r**

ph266-3.10.fid  
 ResearchGroup Echavarren  
 ICIQ\_1H12p8s CDCI3 /opt/topspin pholstein 73

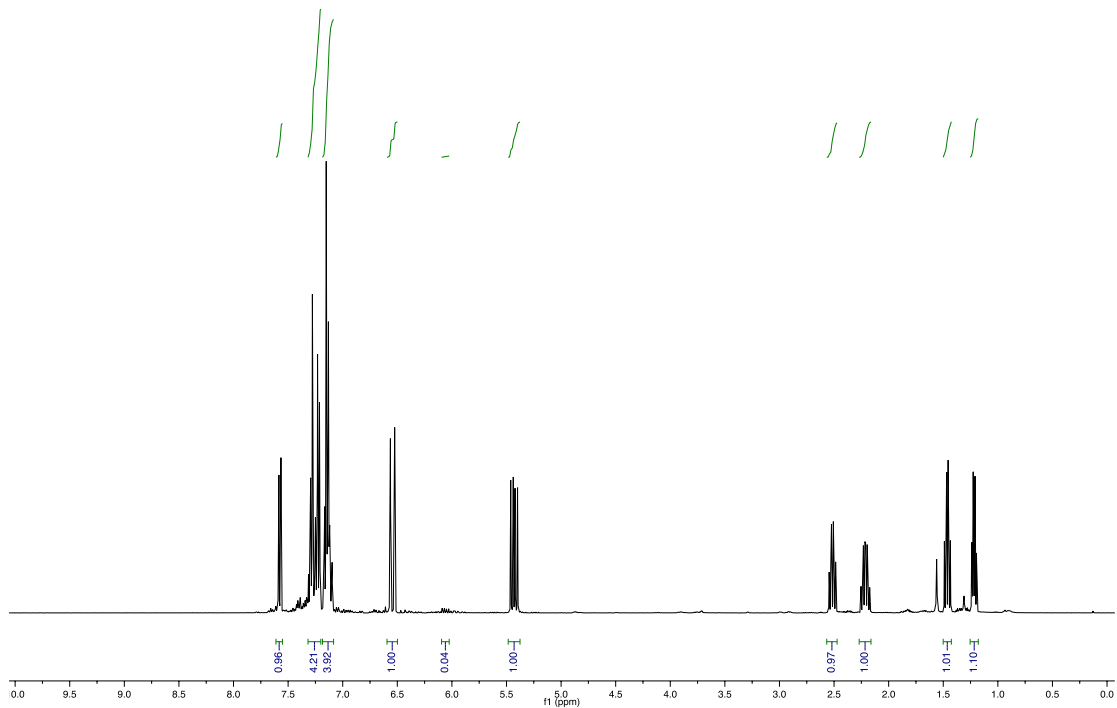

ph266-3.11.fid  
 ResearchGroup Echavarren  
 ICIQ\_13C(1H)512s CDCI3 /opt/topspin pholstein 73

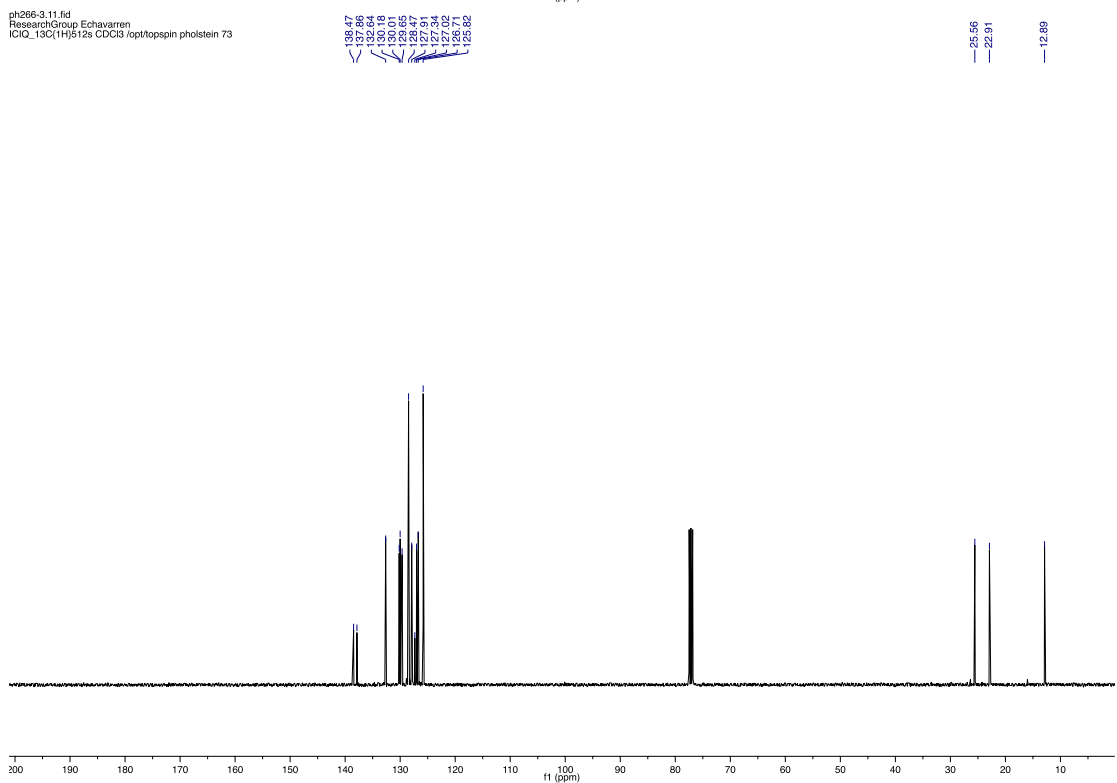

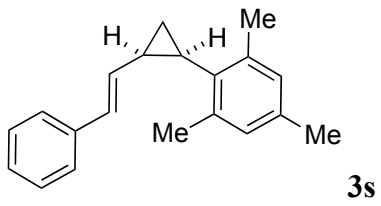

ph271-1.10.fid  
 ResearchGroup.Echavarren  
 ICIQ\_1H12p8s CDCI3 /opt/topspin pholstein 27

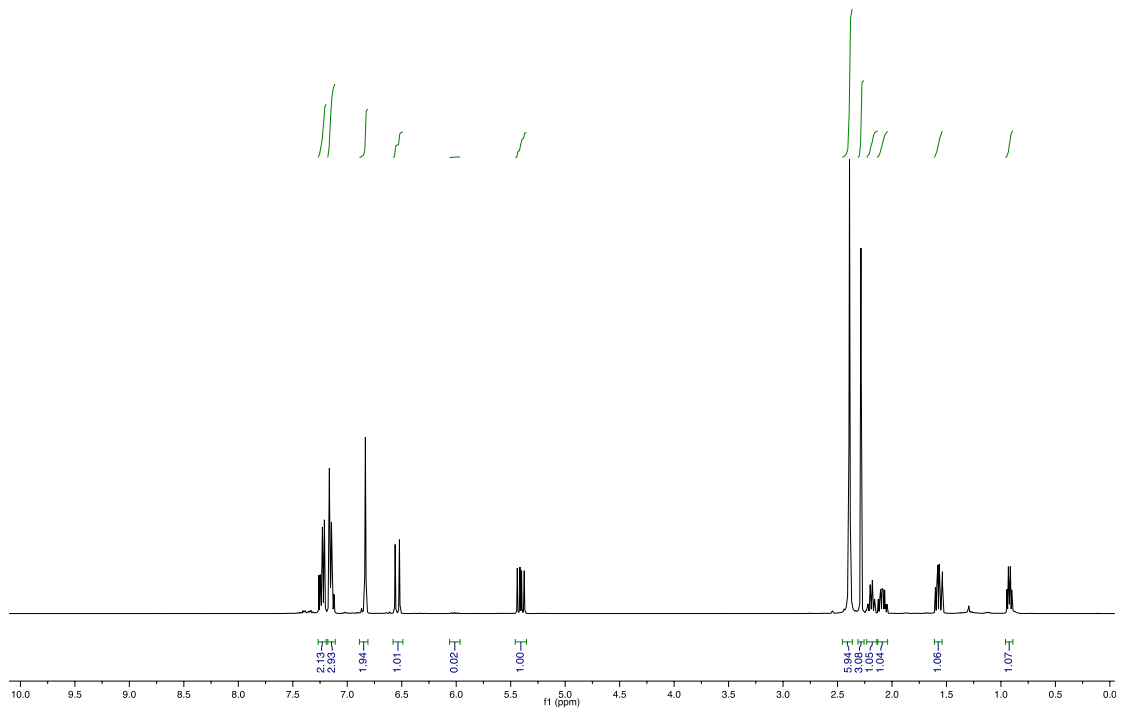

ph271-1.12.fid  
 ResearchGroup.Echavarren  
 ICIQ\_13C1H512s CDCI3 /opt/topspin pholstein 17

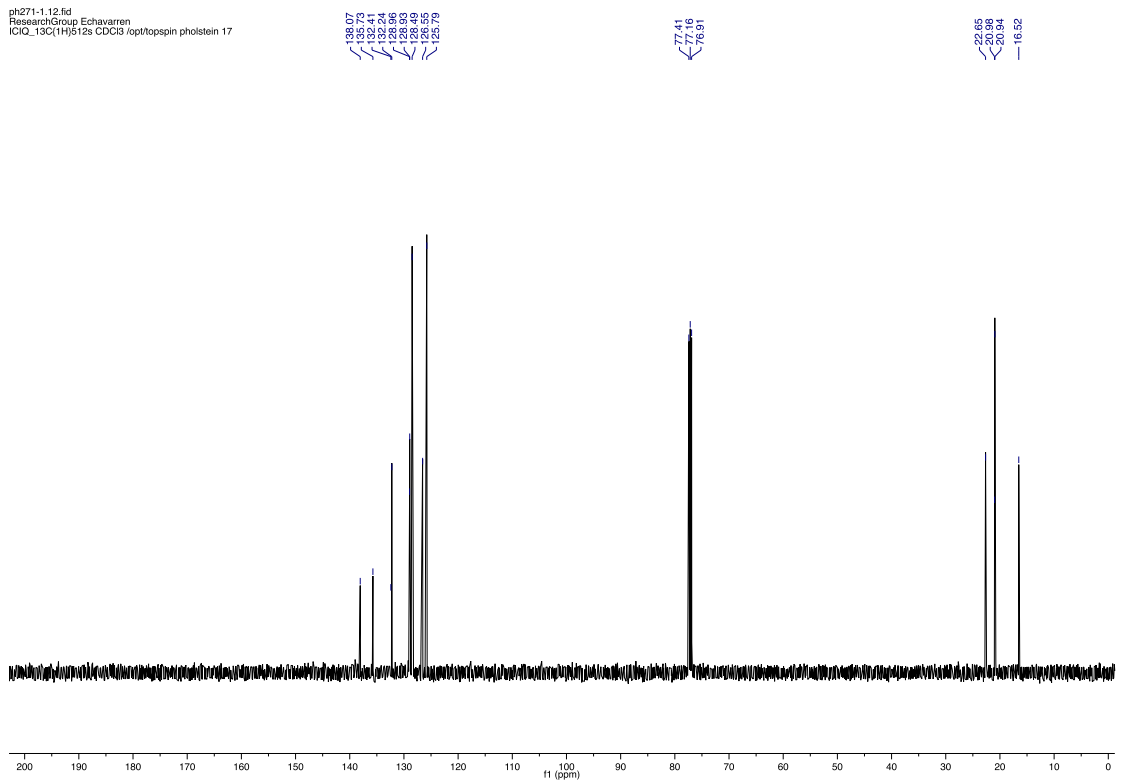

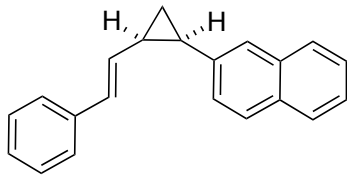

**3t**

ph288-1.10.fid  
 ResearchGroup Echavarren  
 ICIQ\_1H12p8s CDC13 /opt/topspin pholstein 113

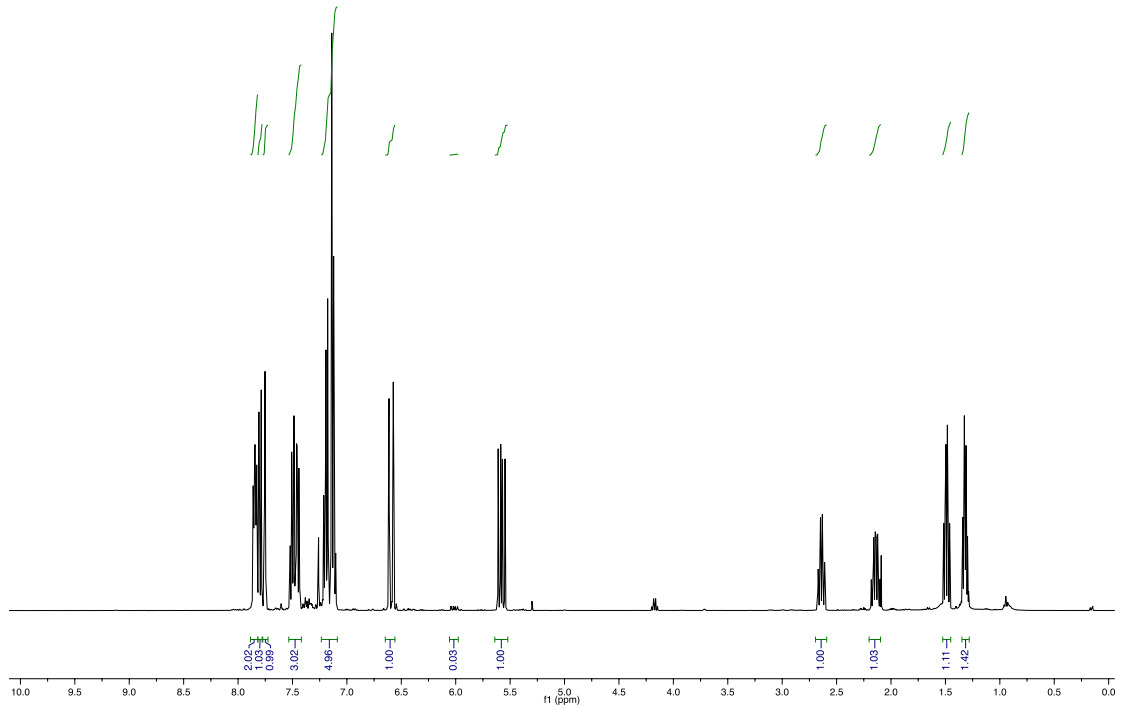

ph288-1.11.fid  
 ResearchGroup Echavarren  
 ICIQ\_13C1H1S12s CDC13 /opt/topspin pholstein 113

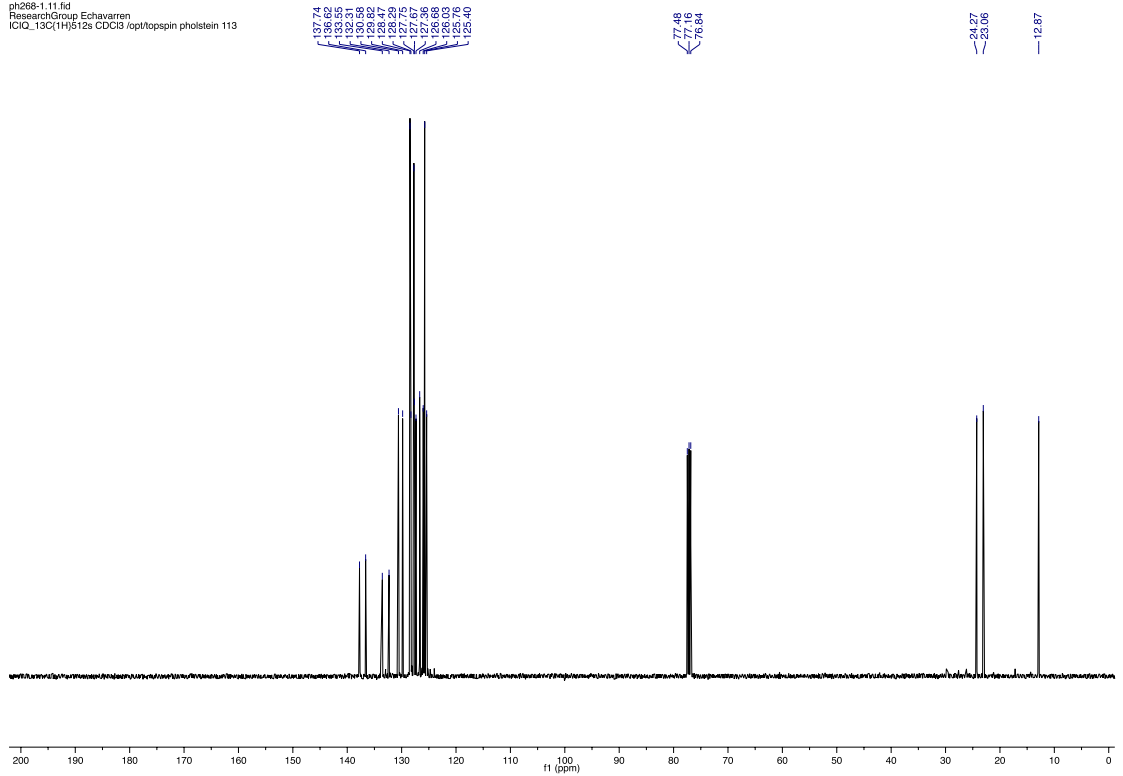

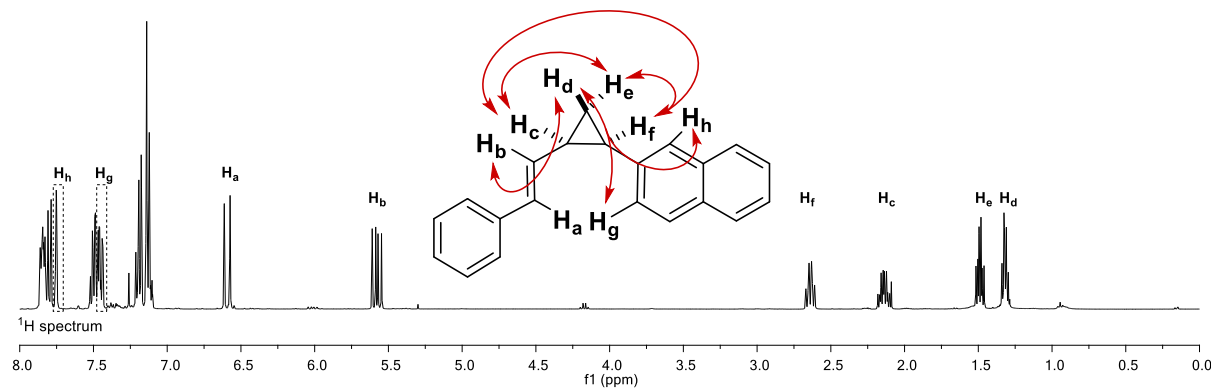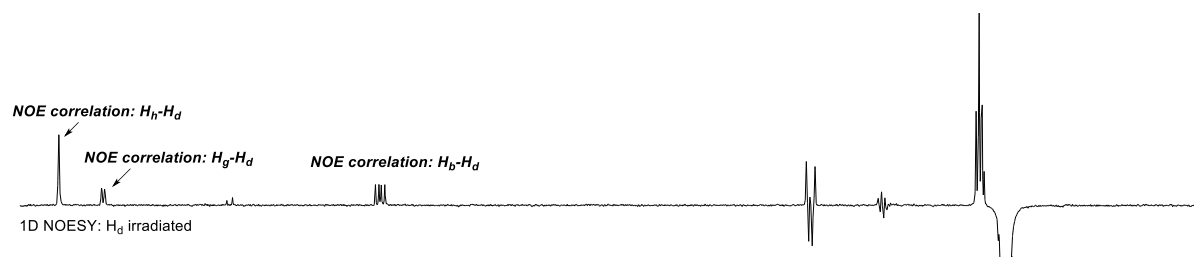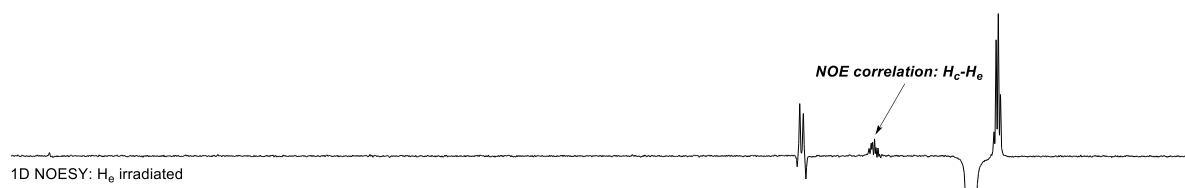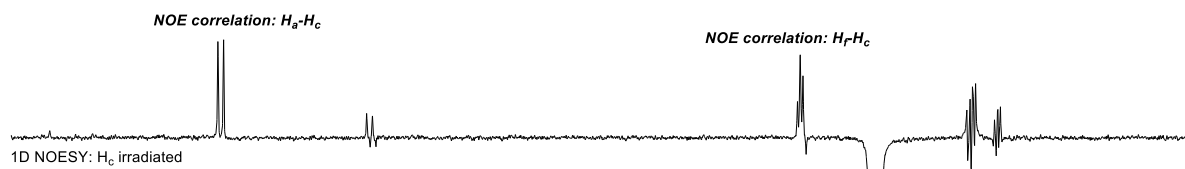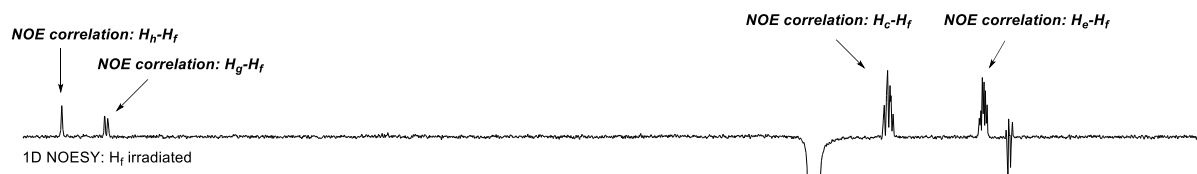

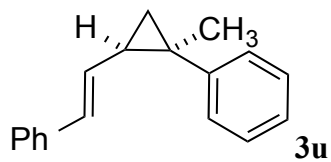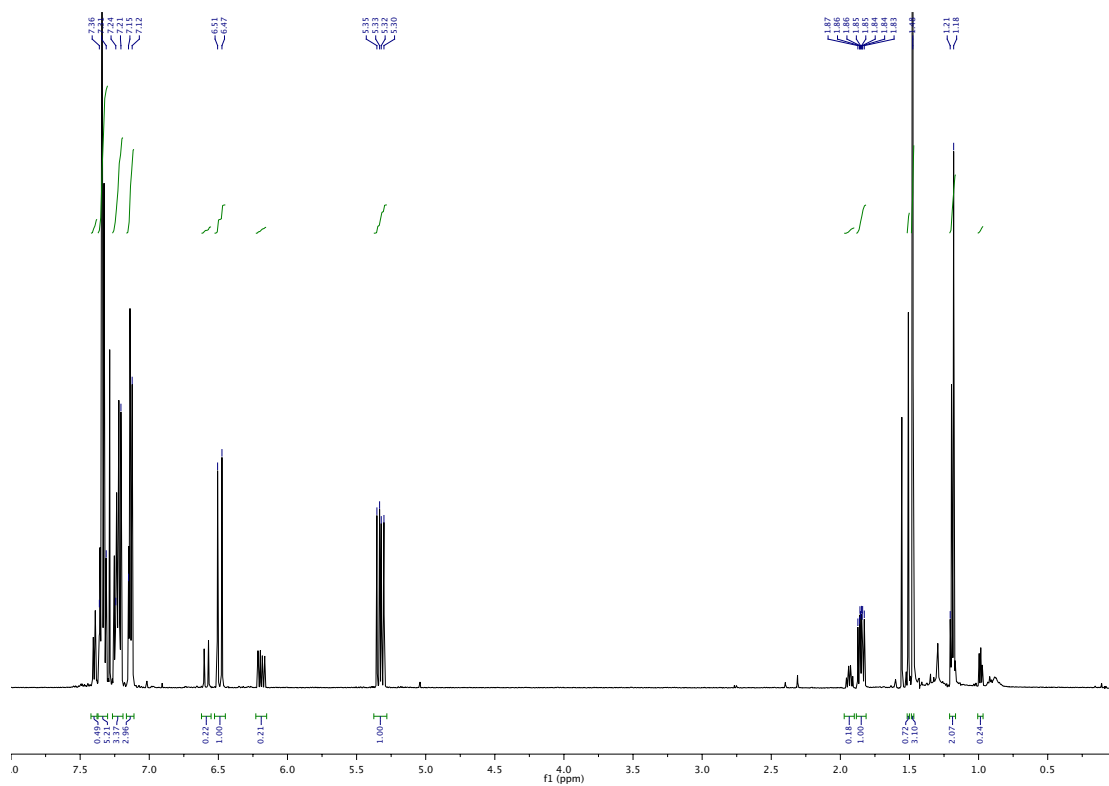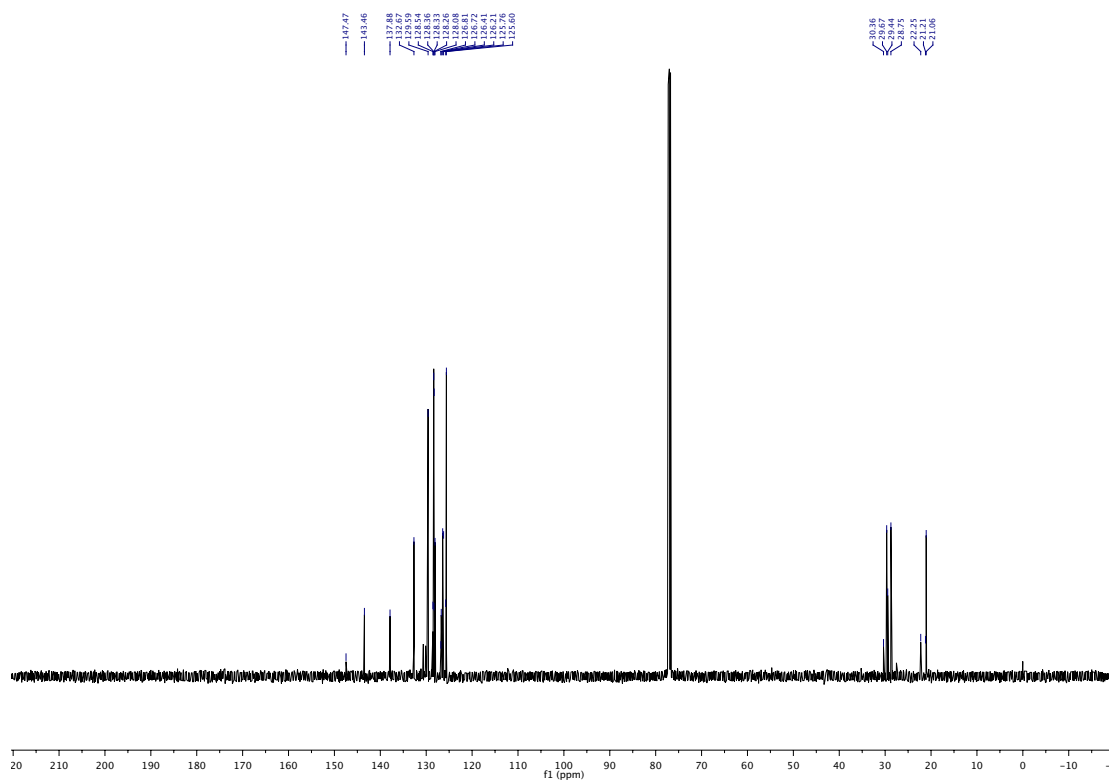



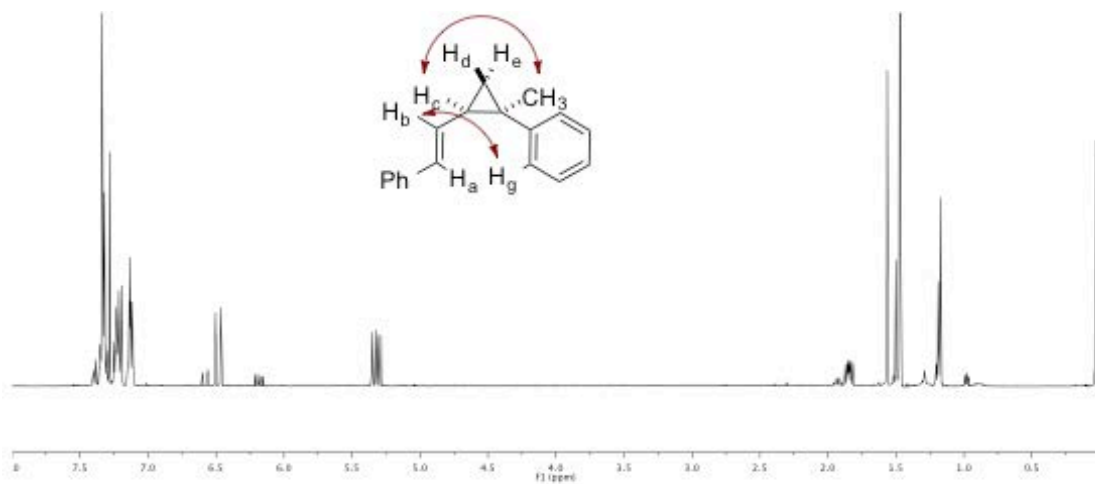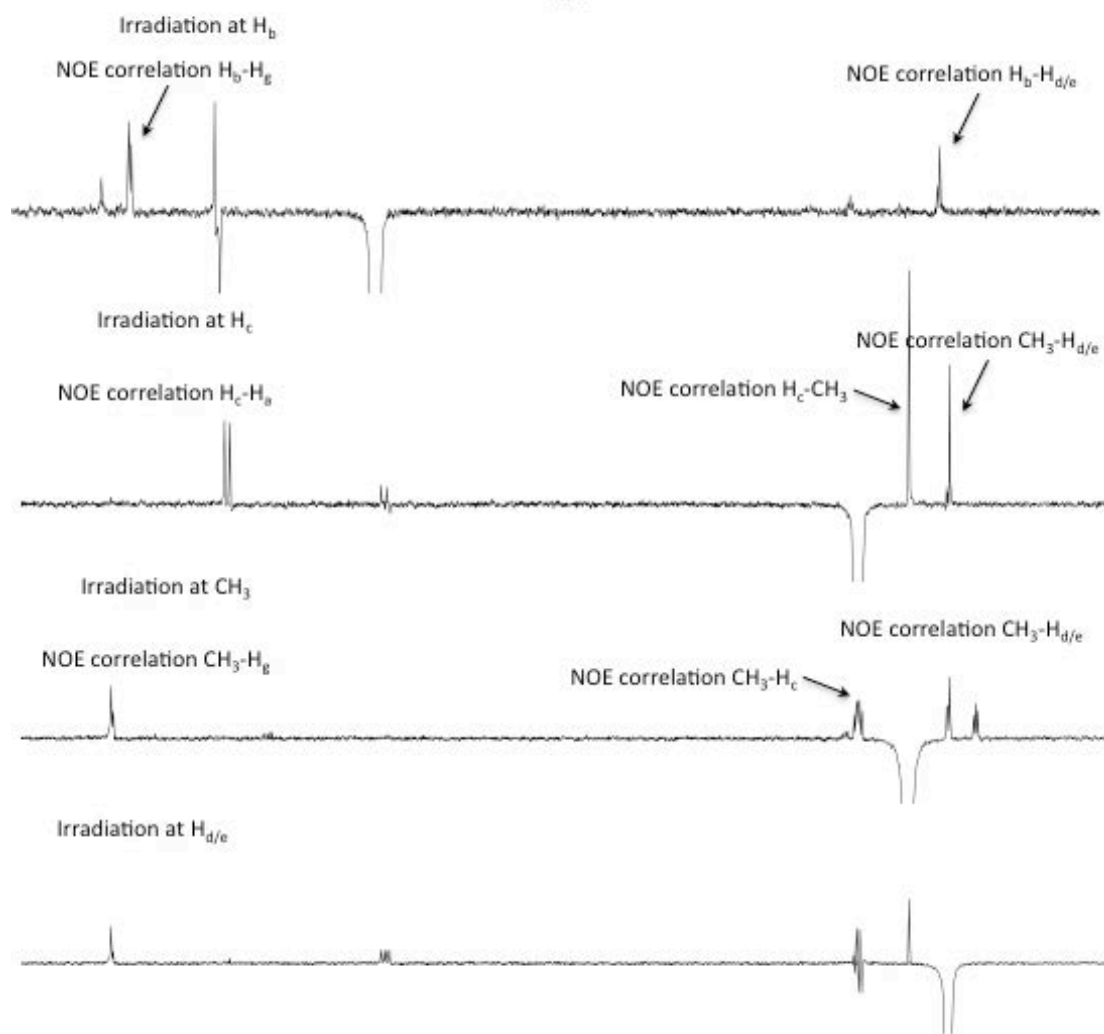

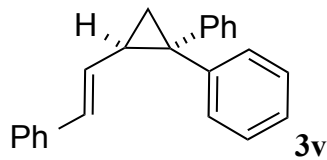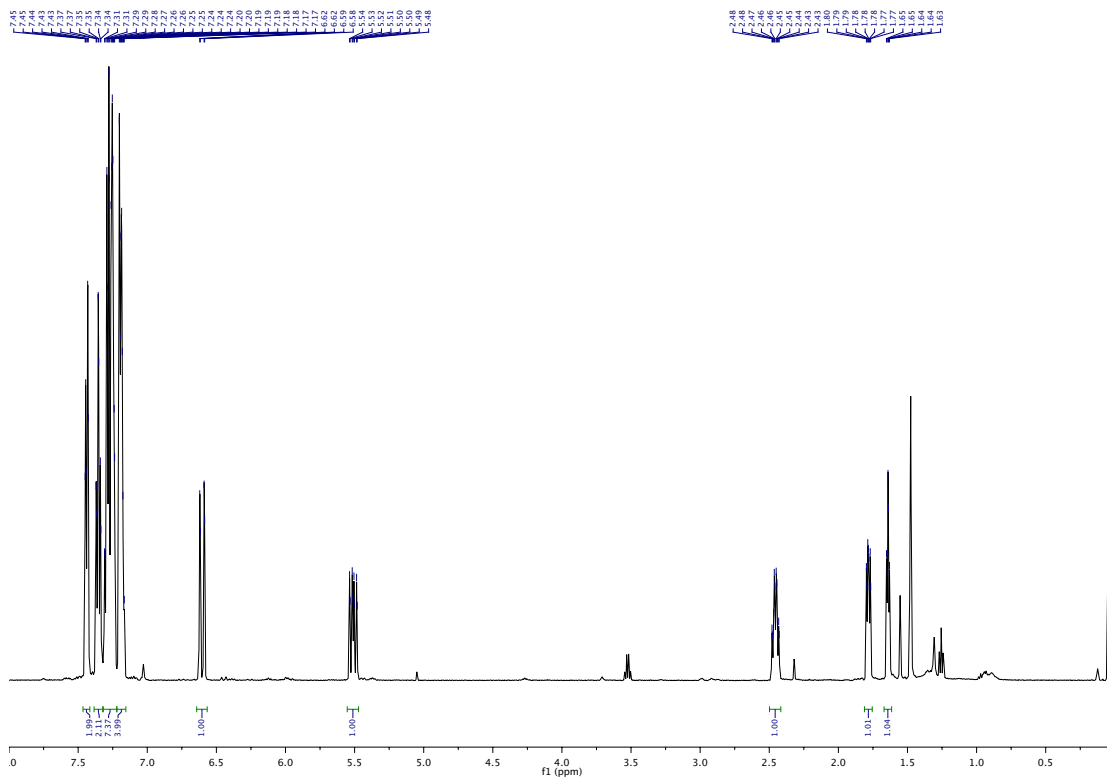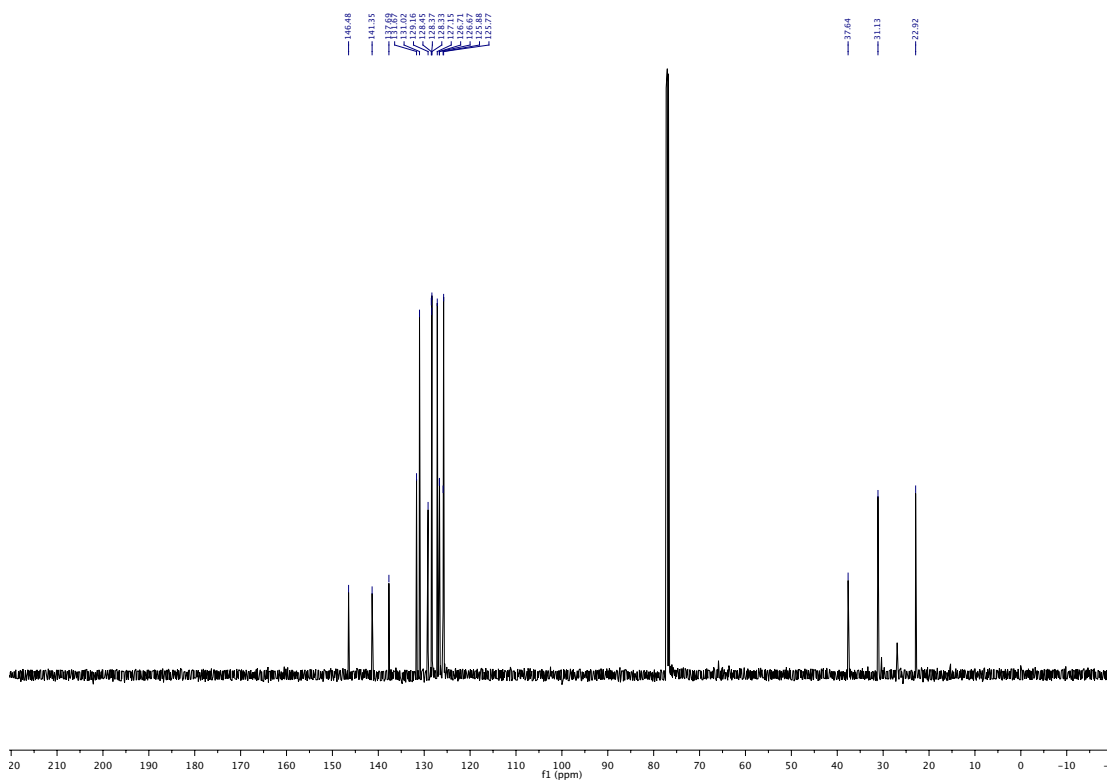

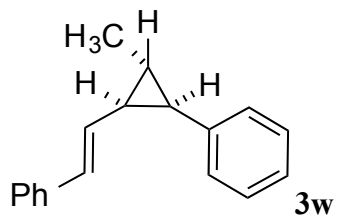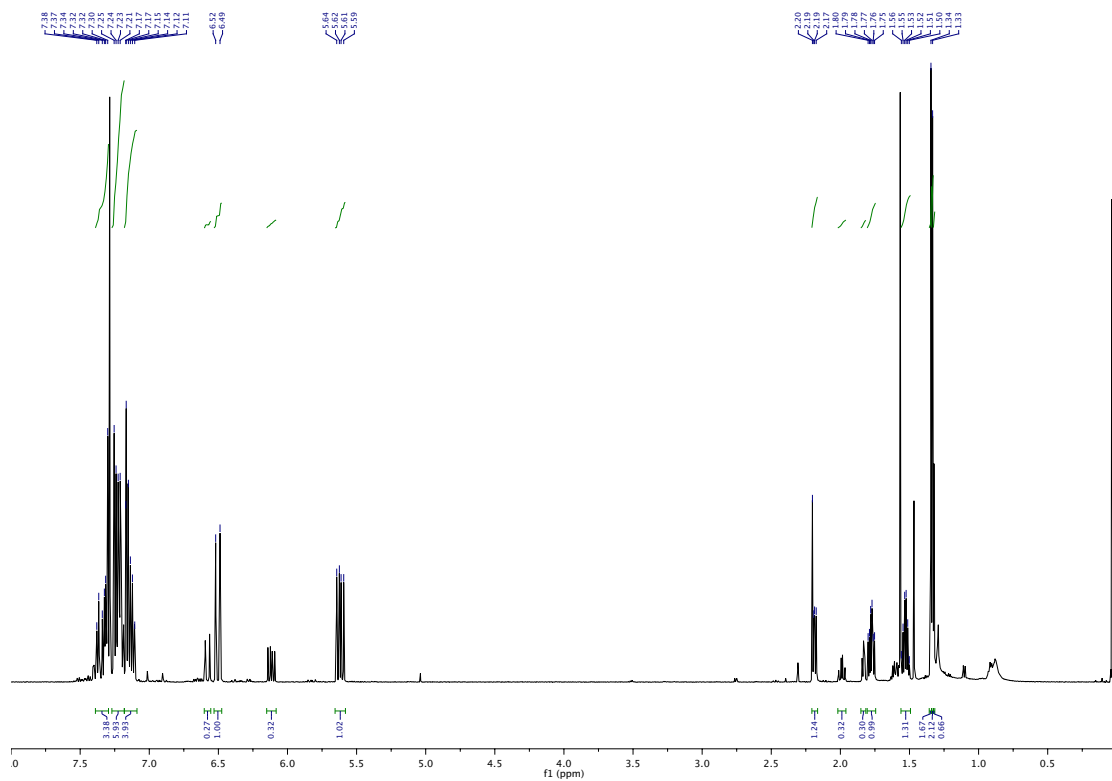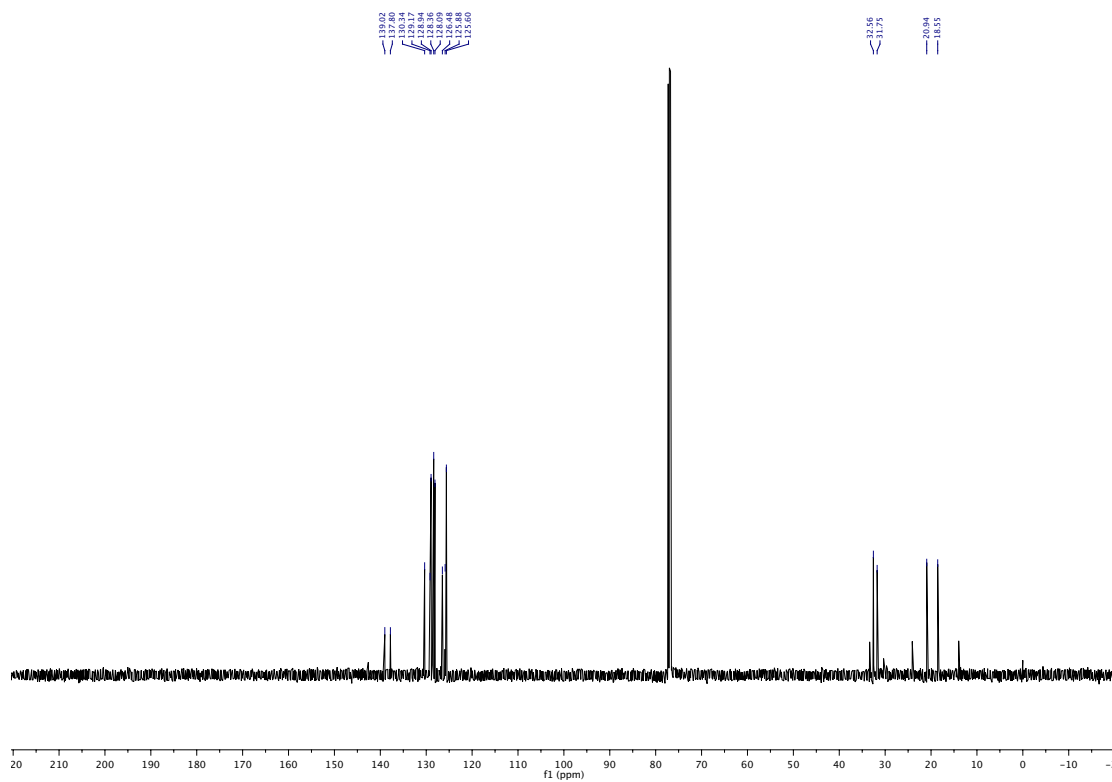

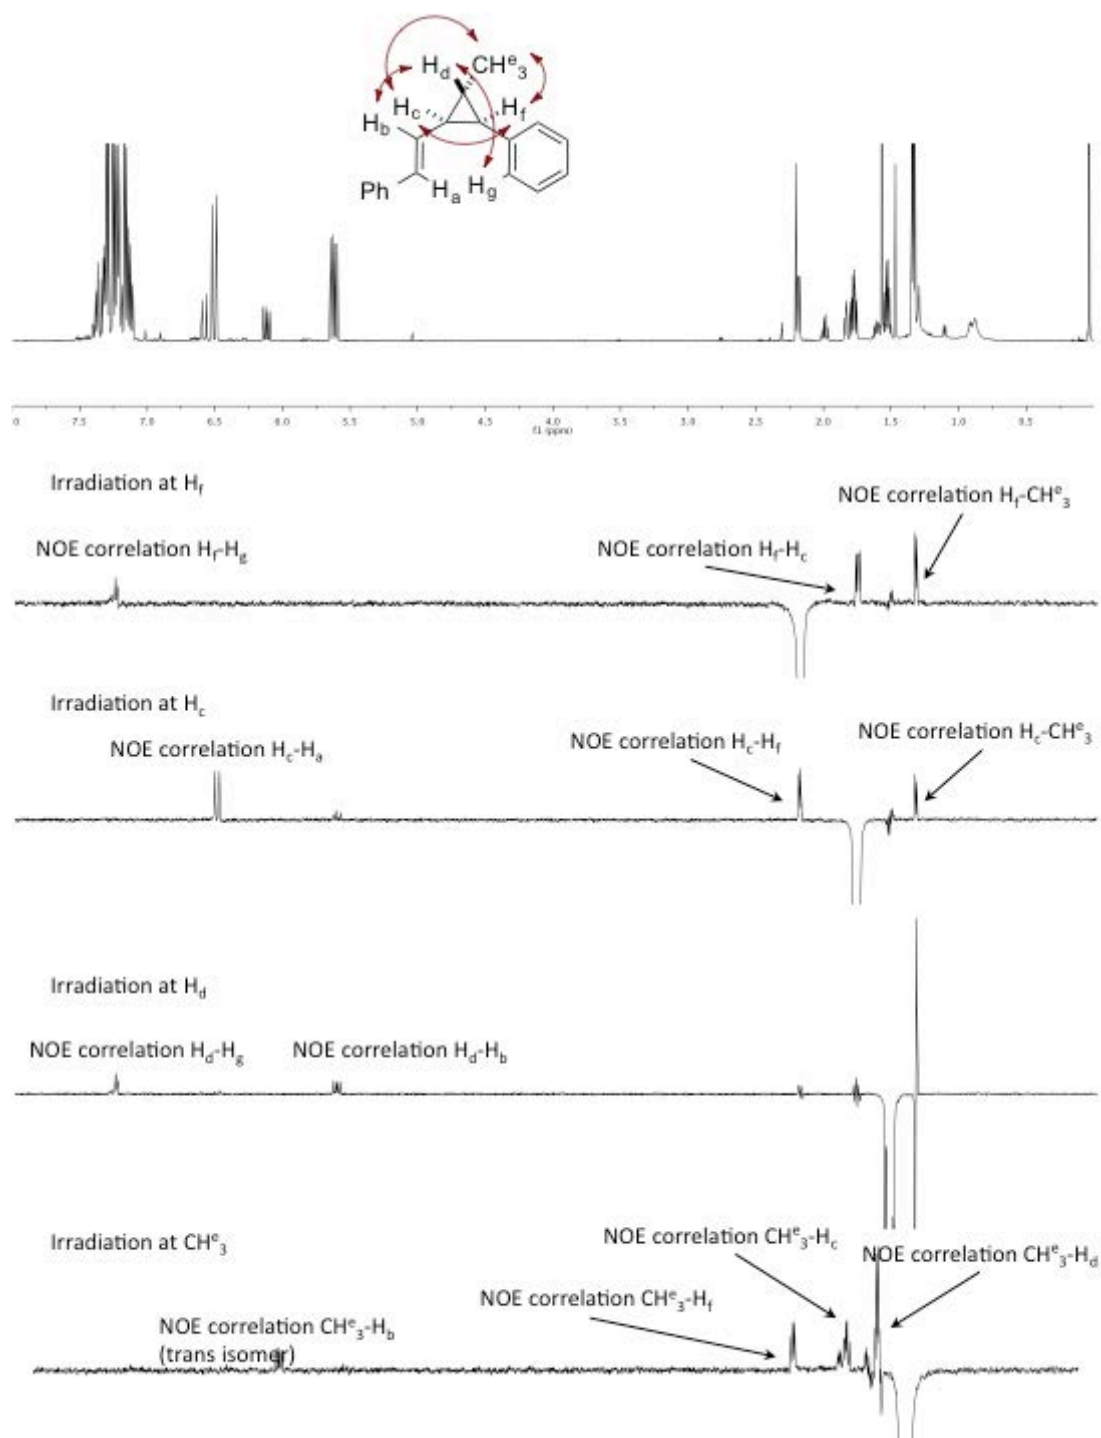



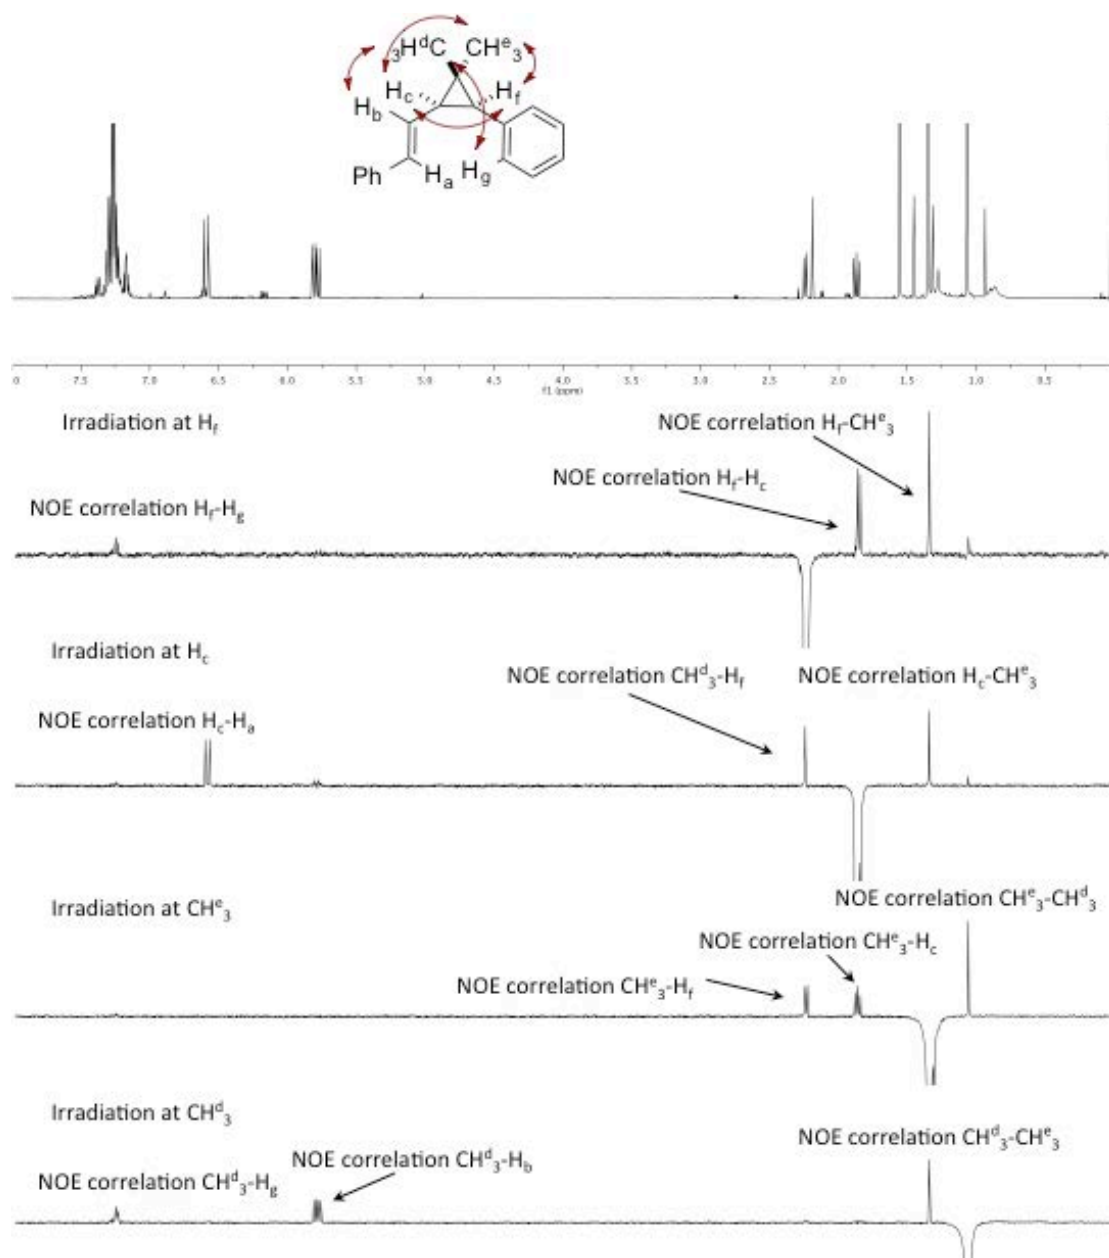

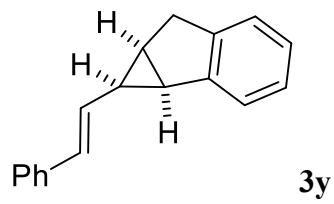

ph250-3.1.fid  
1H Experiment

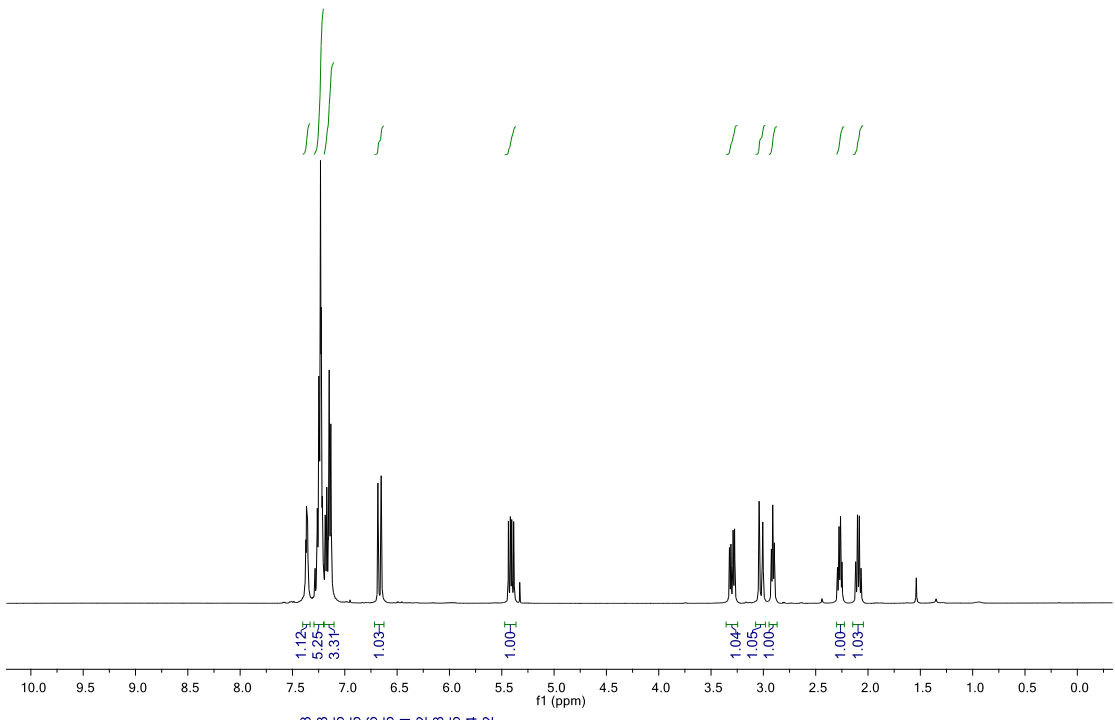

143.73  
142.43  
137.85  
131.95  
128.46  
126.75  
126.51  
126.12  
125.88  
125.75  
124.74  
124.22

77.41  
77.16  
76.91

32.31  
31.95  
26.15  
24.31

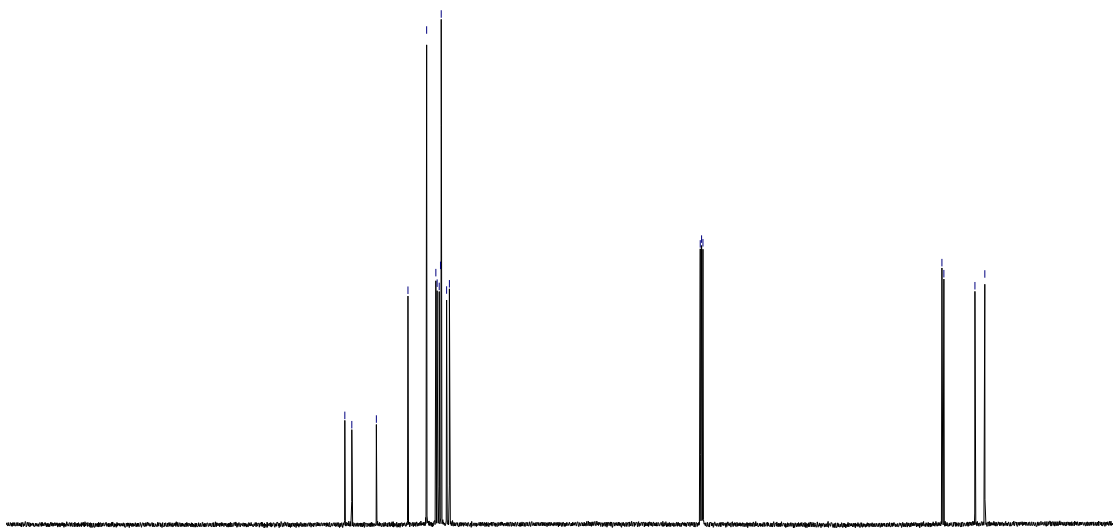

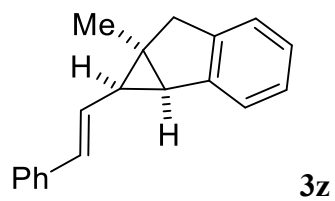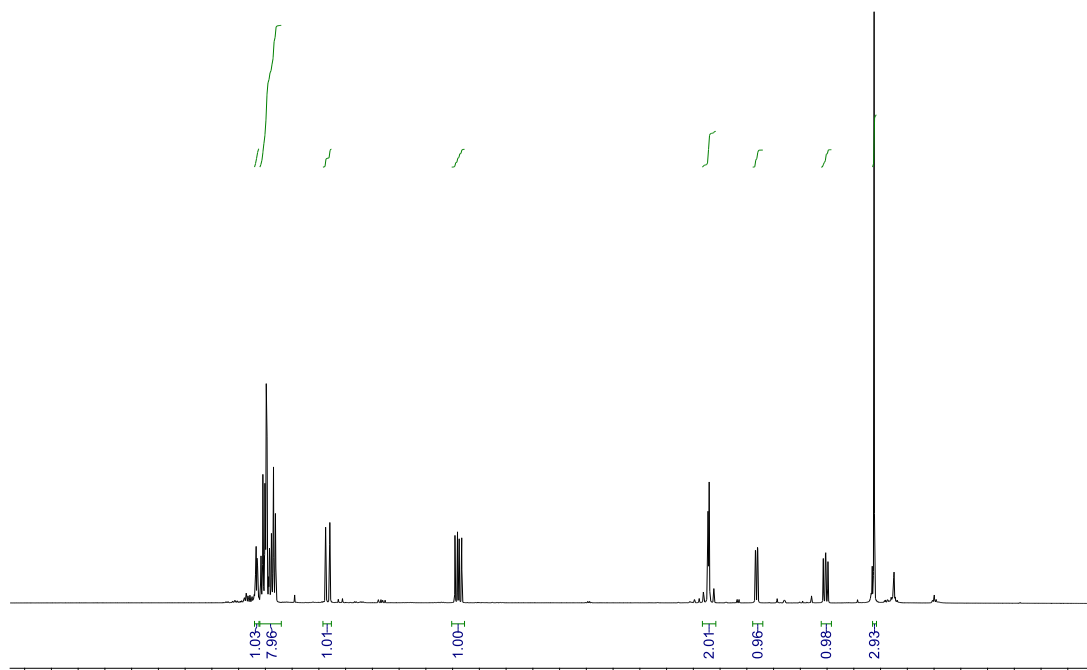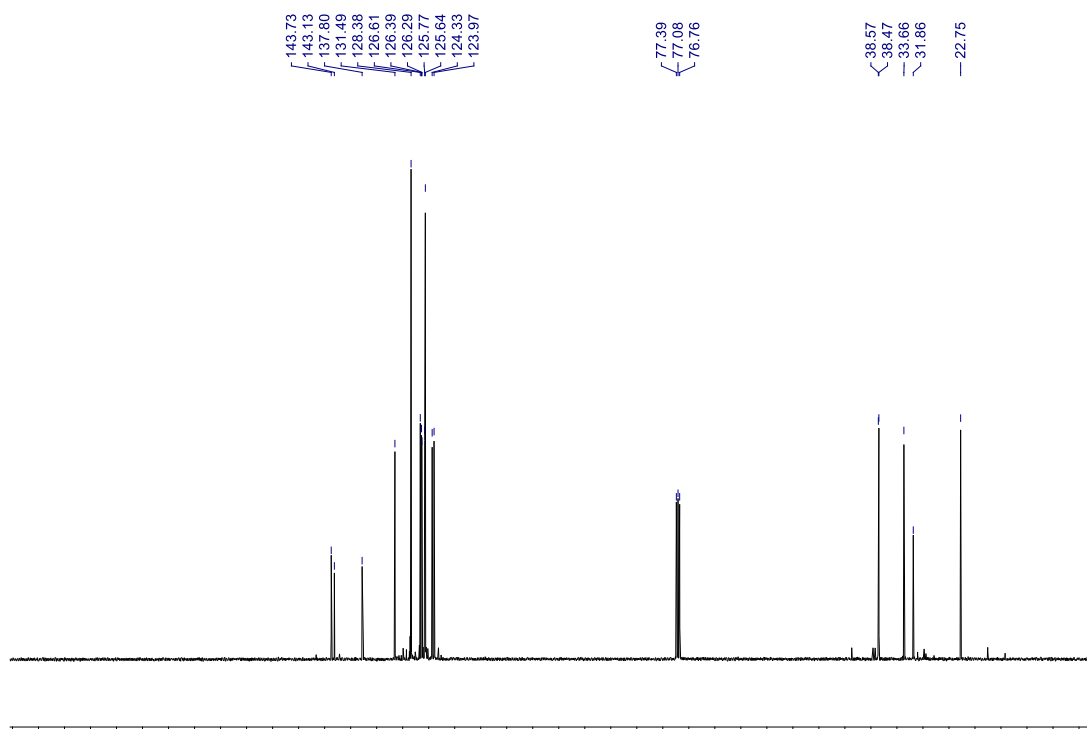



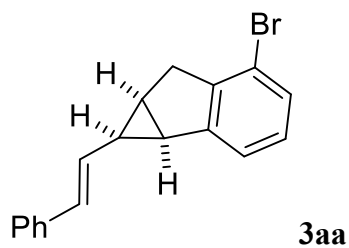

ph284  
 ResearchGroup Echavarren  
 ICIQ\_1H12p8s CDCB /opt/topspin pholstein 111

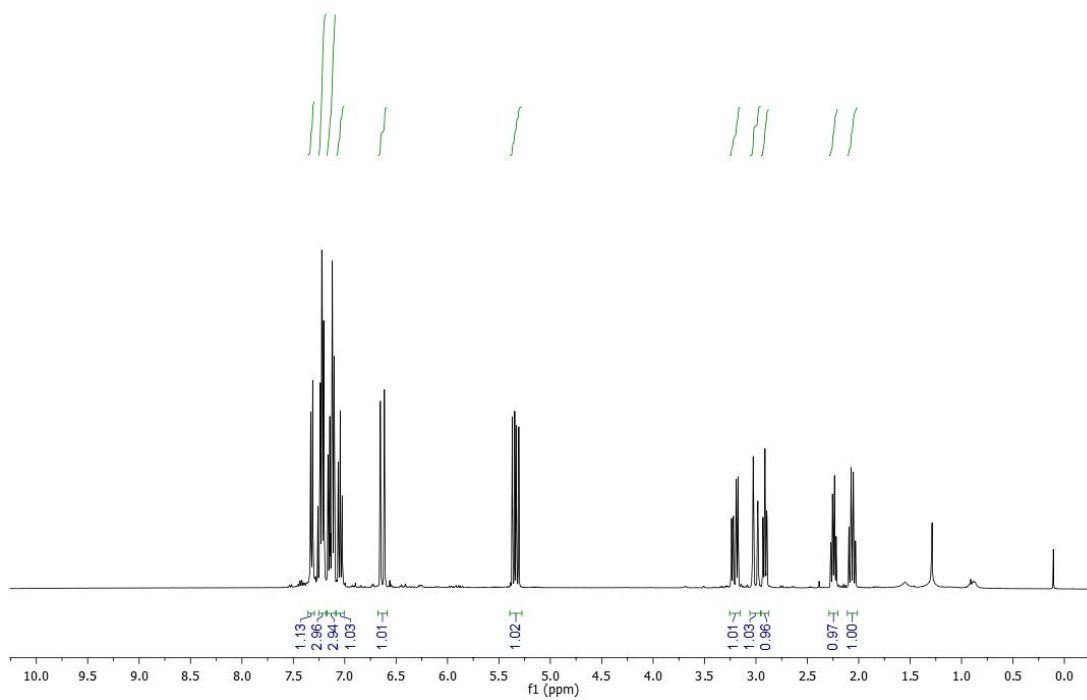

ph284  
 ResearchGroup Echavarren  
 ICIQ\_13C(1H)512s CDCl3 /opt/topspin pholstein

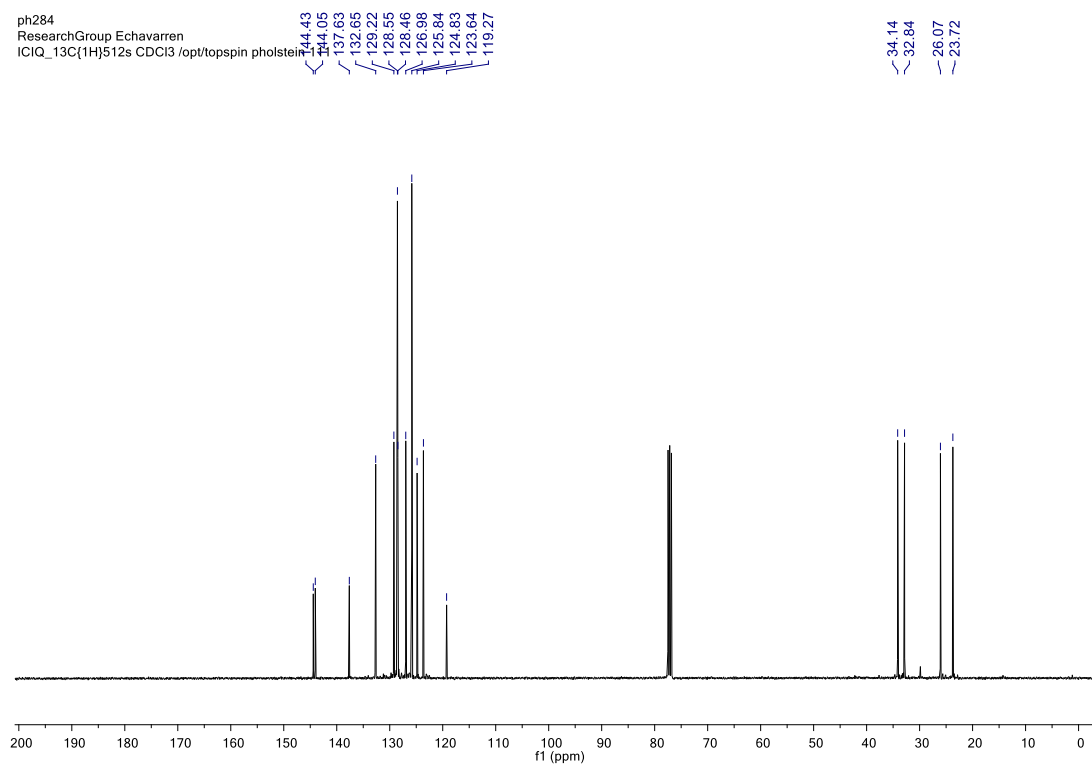

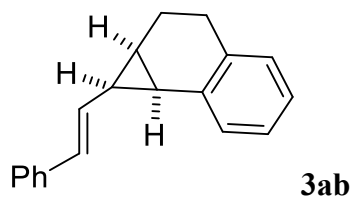

ph318  
 ResearchGroup Echavarren  
 ICIQ\_1H12p8s CDCl3 /opt/topspin pholstein 31

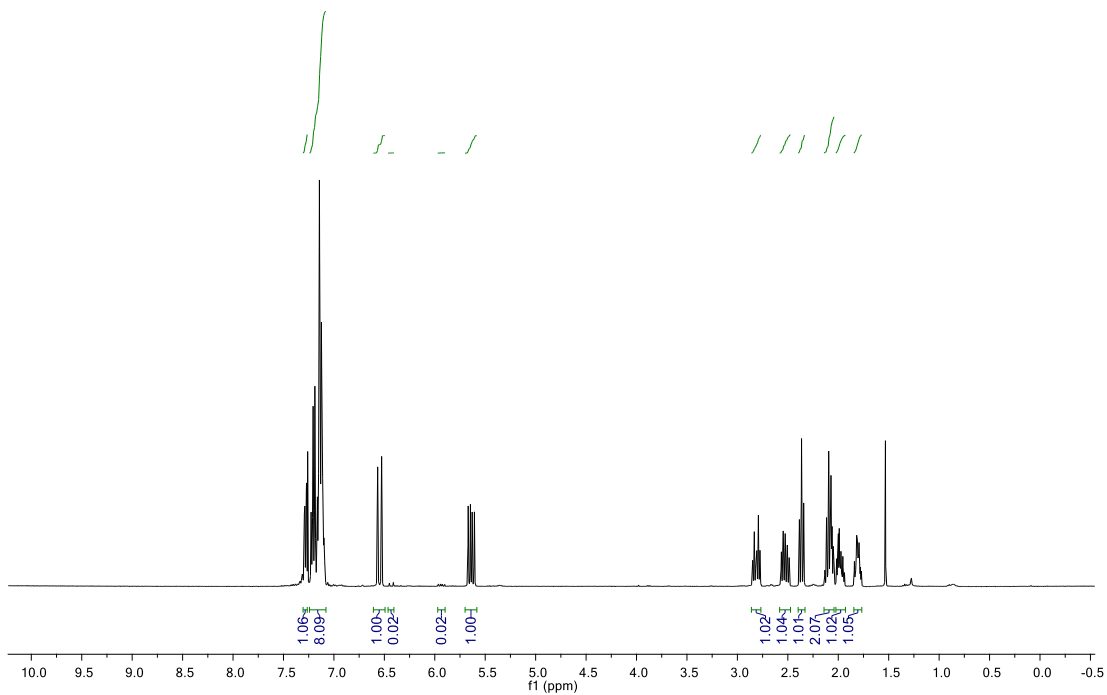

ph318  
 ResearchGroup Echavarren  
 ICIQ\_13C(1H)512s CDCl3 /opt/topspin pholstein 31

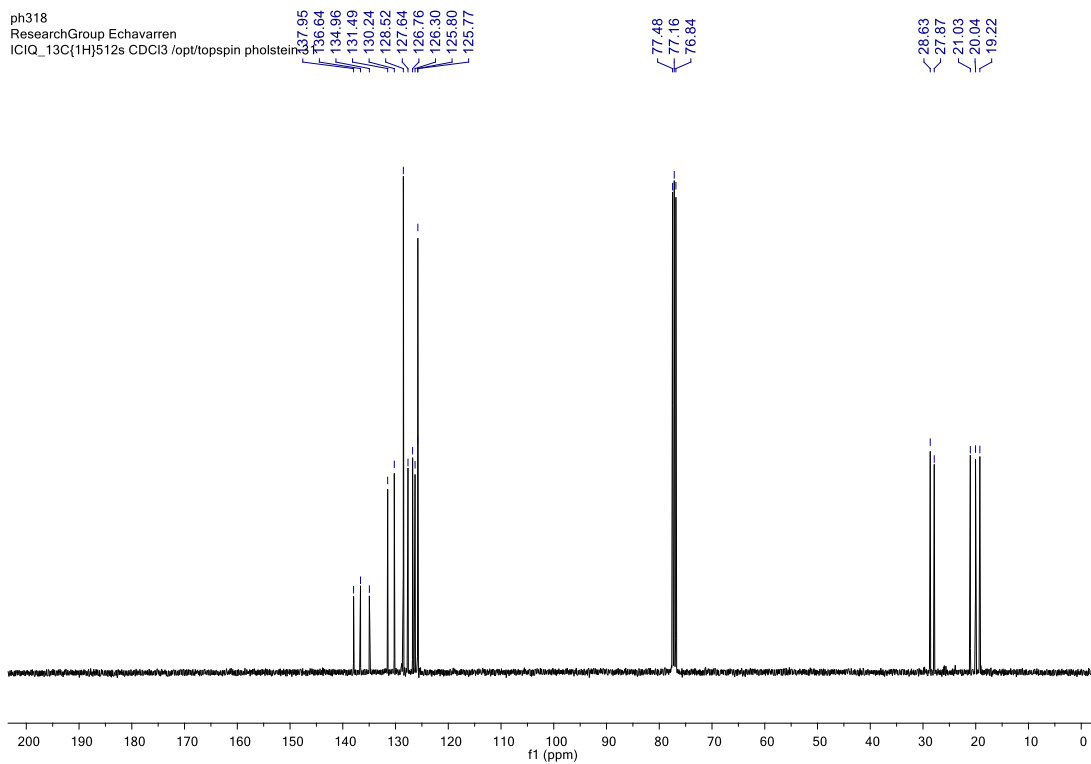

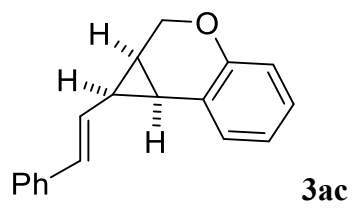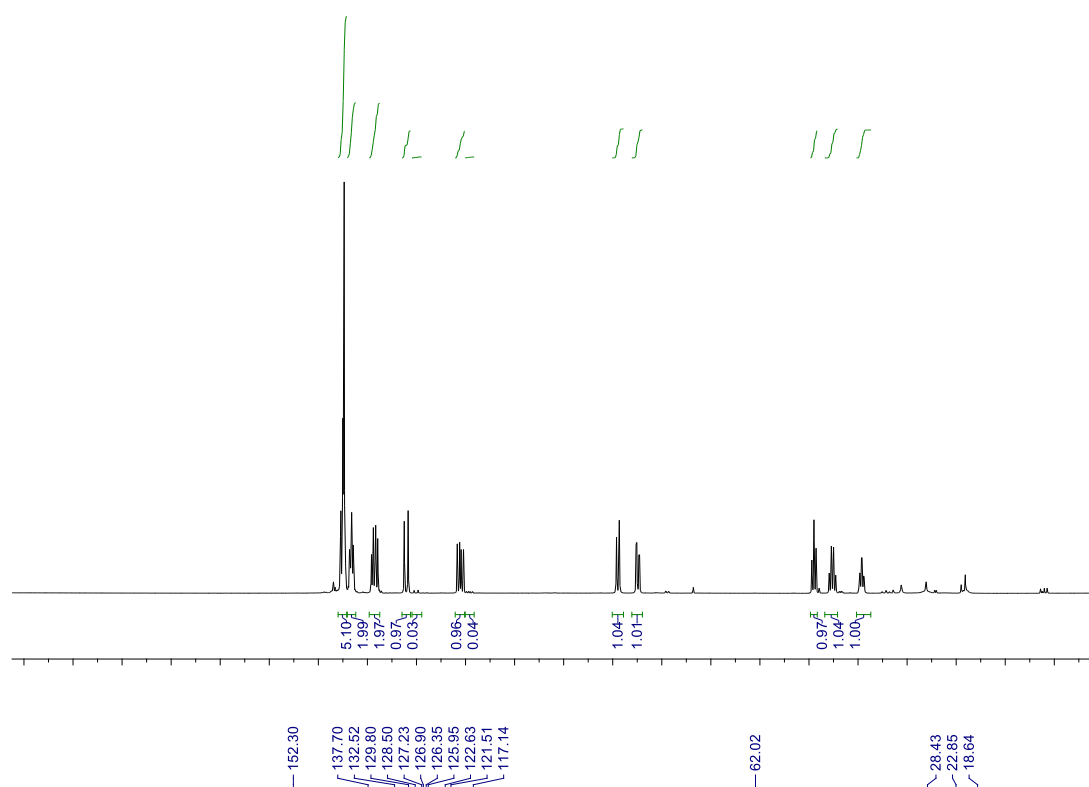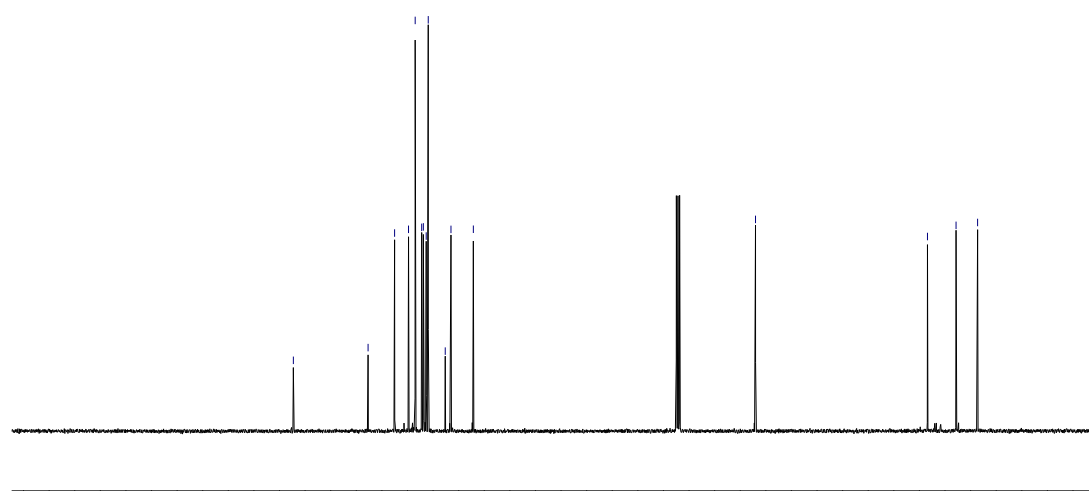

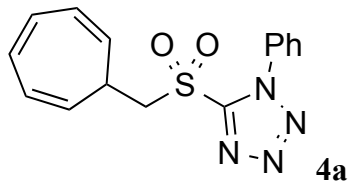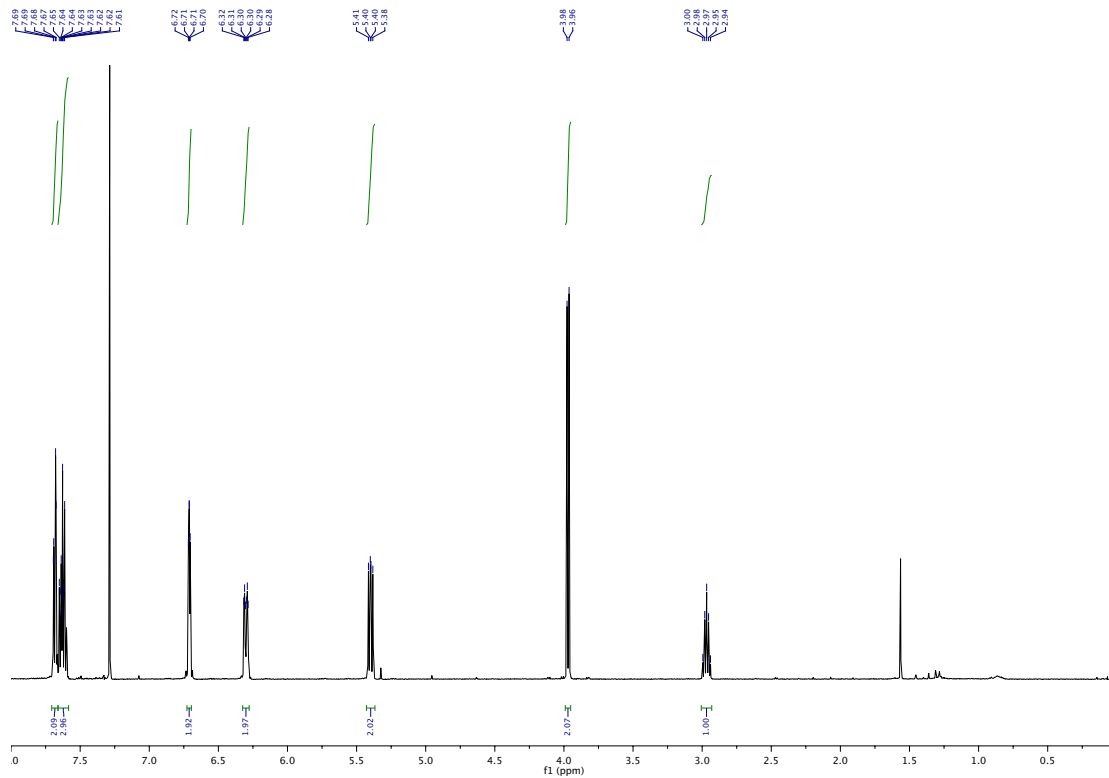

BHD-X-334\_13C.10.fid  
 ResearchGroup Echavarren  
 ICIQ\_13C1H1S12s CDCl<sub>3</sub> /opt/topspin bherle 43

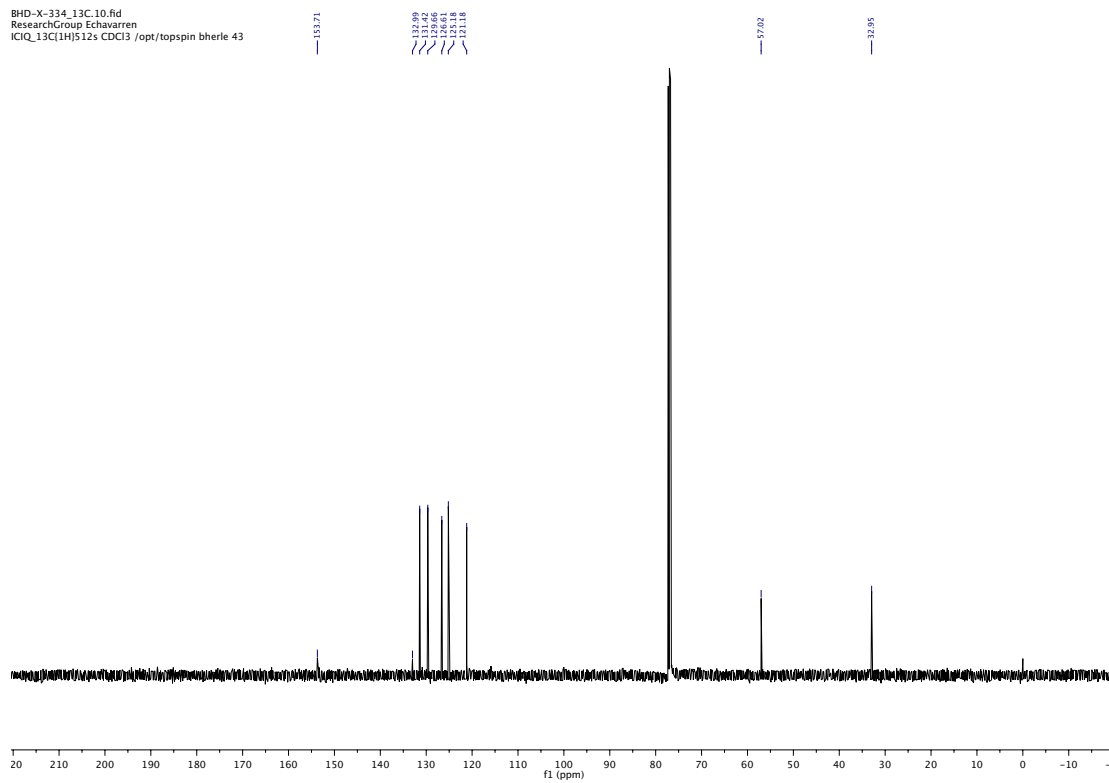

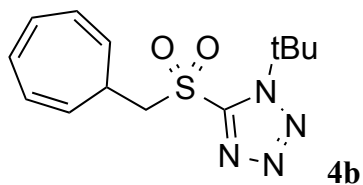

BHE-X-358\_1H\_10.fid  
 ResearchGroup Echarren  
 ICIQ\_1H20p8s CDCl3 /opt/topspin

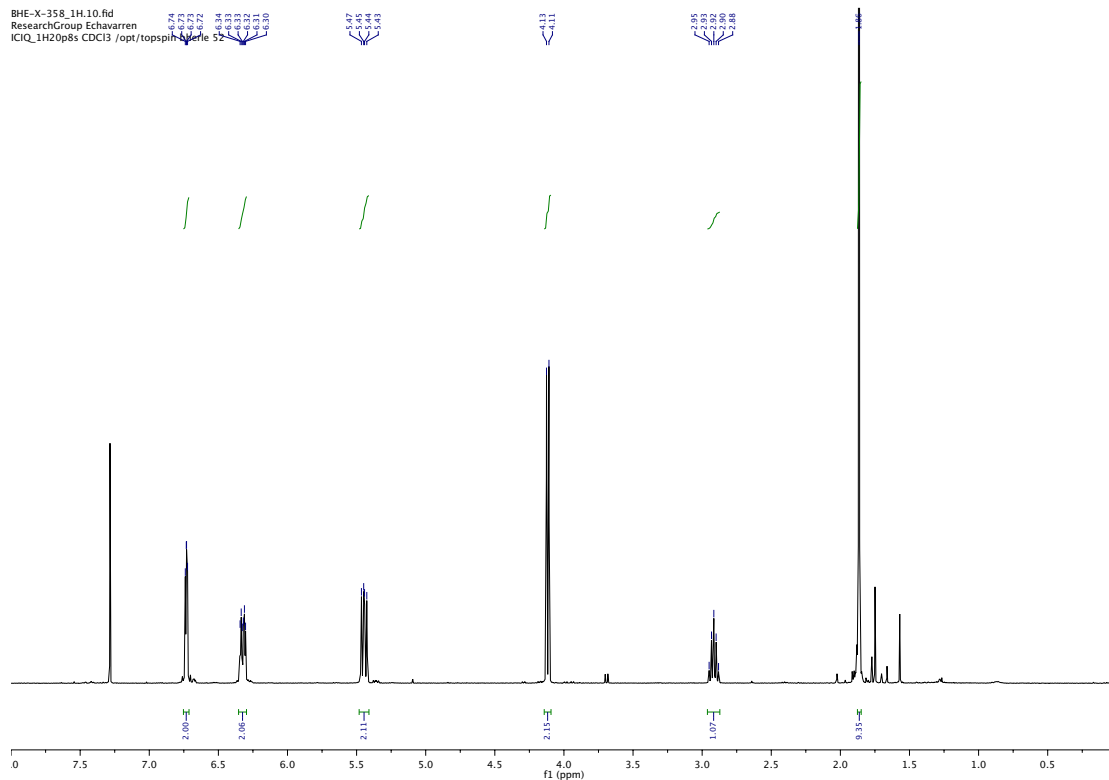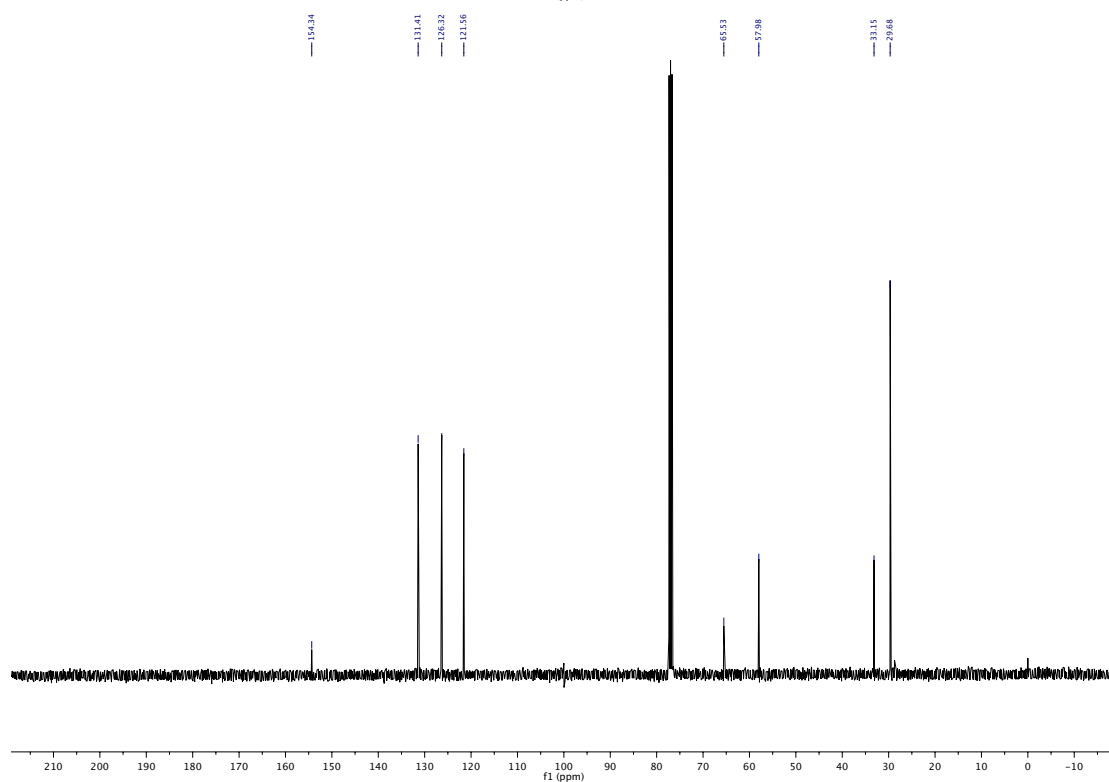

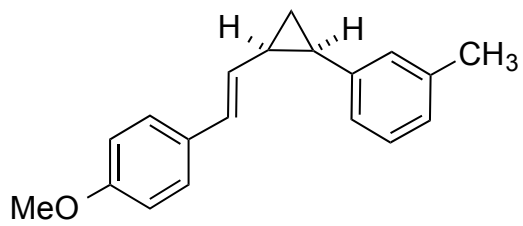

3ad

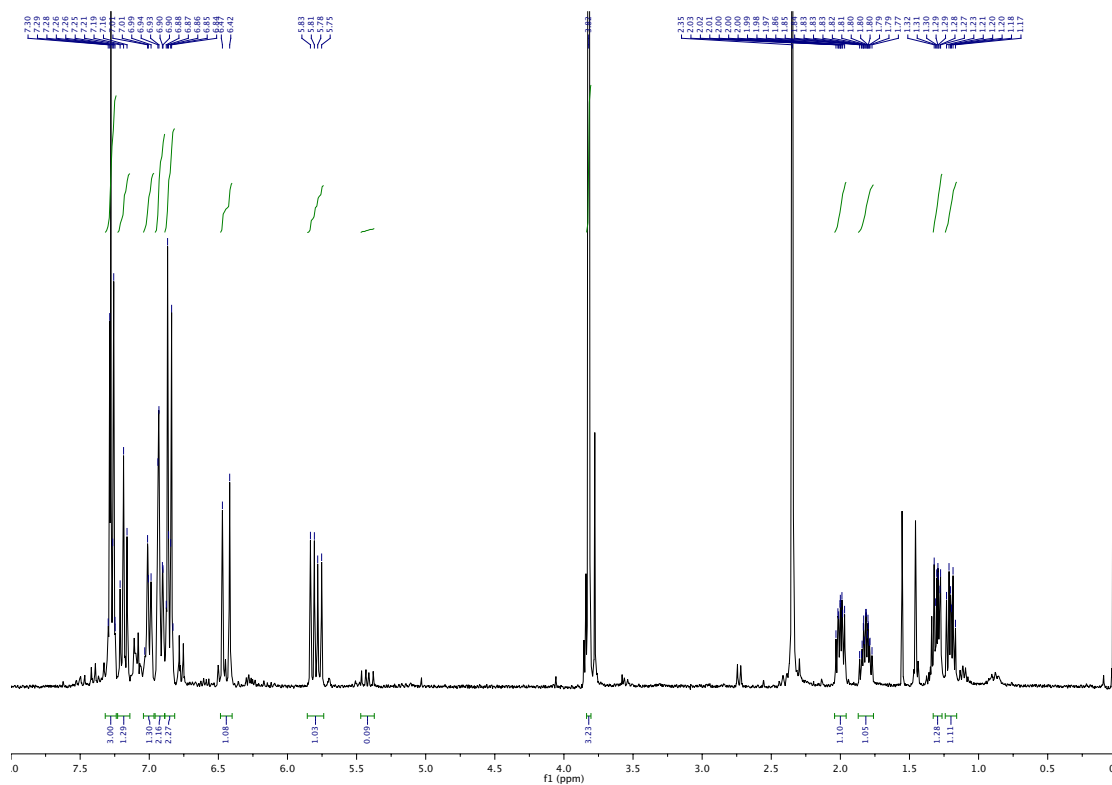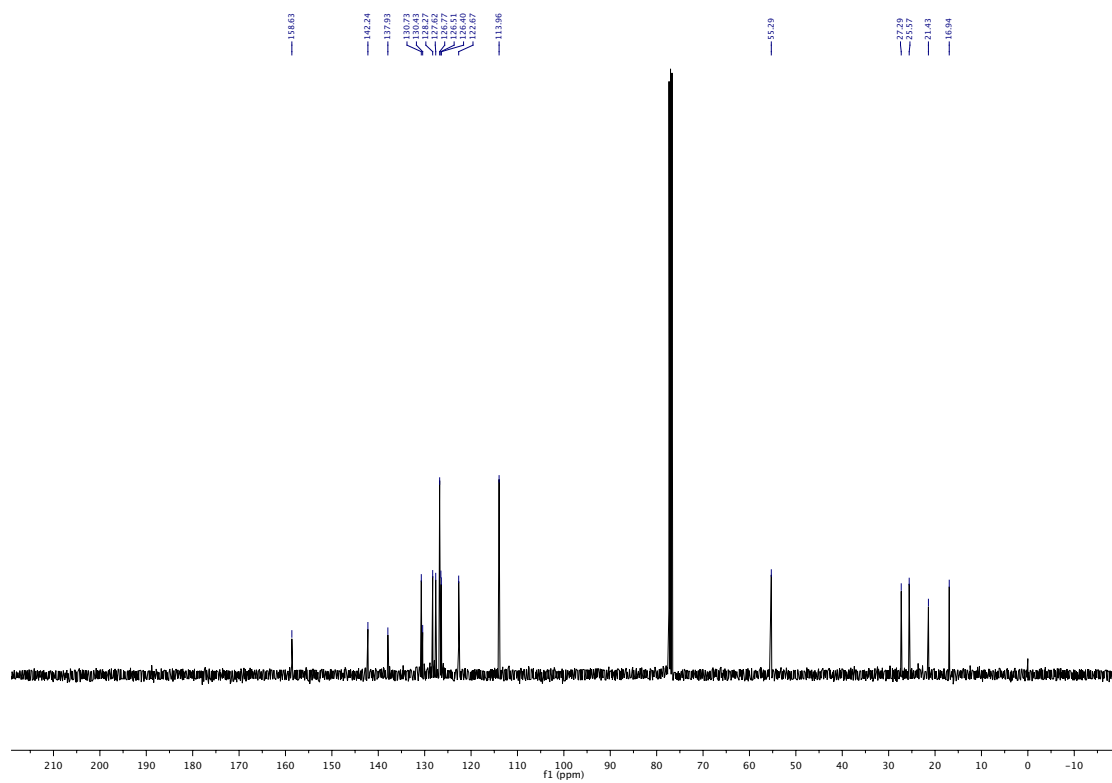

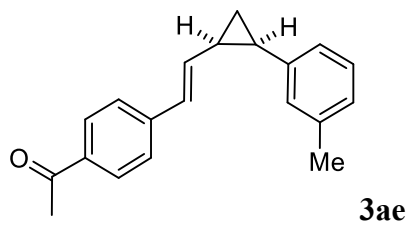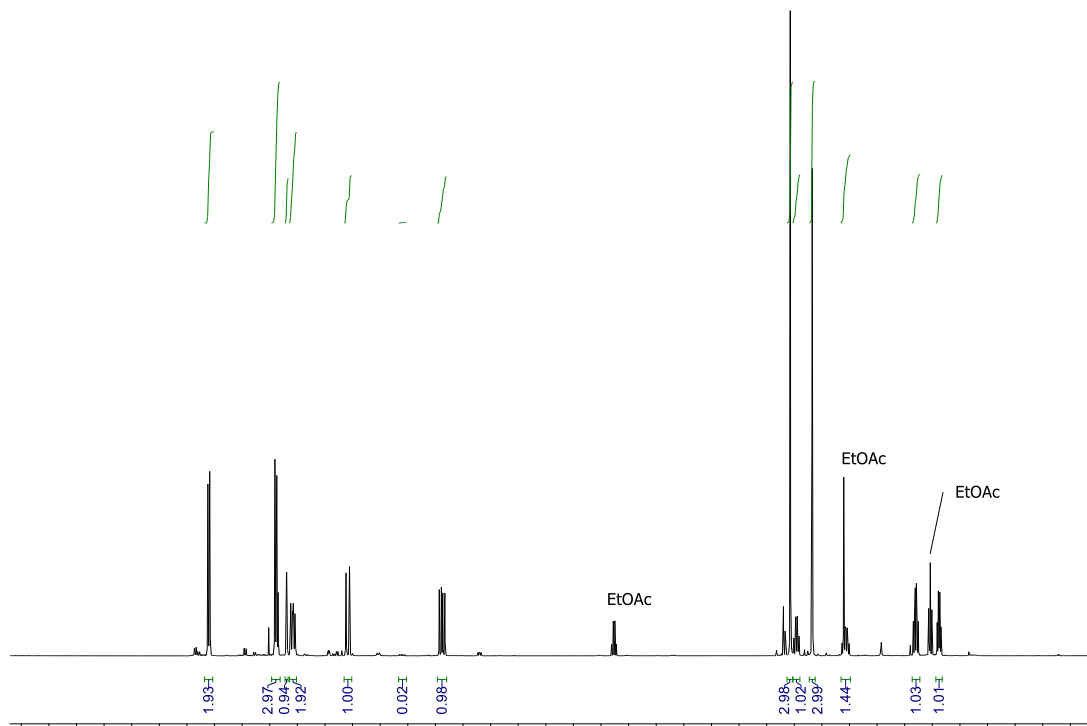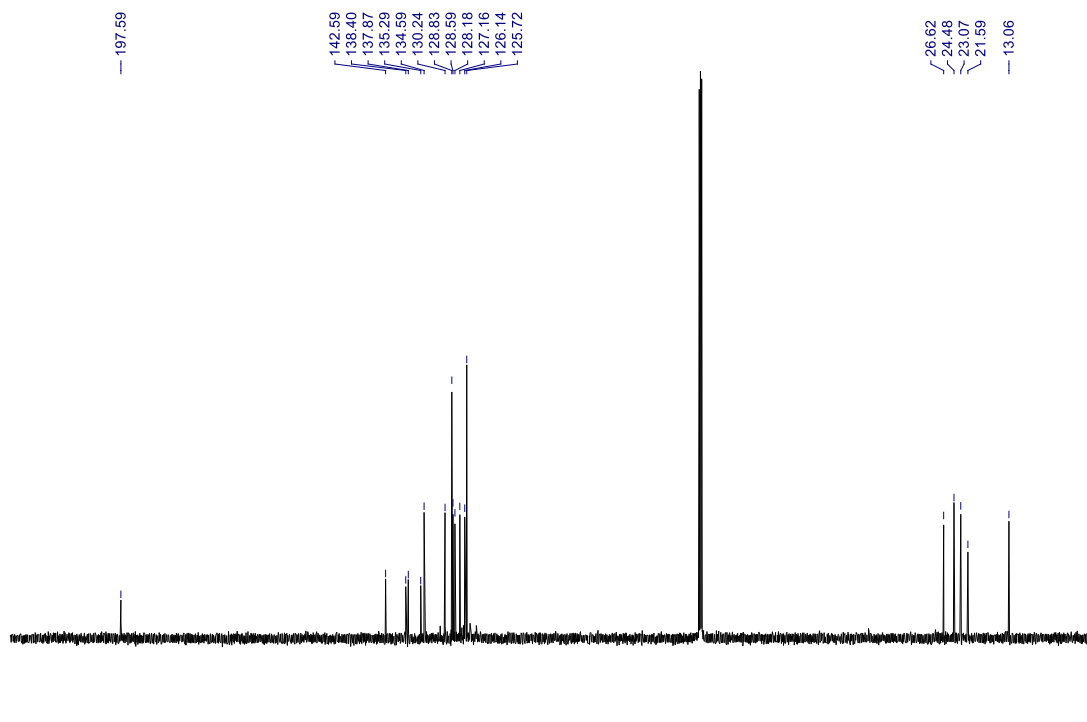

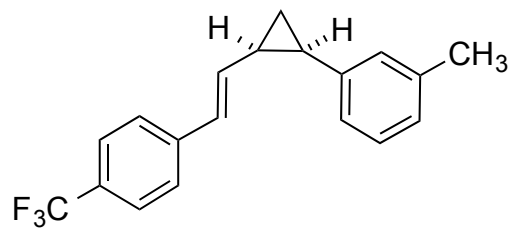

**3af**

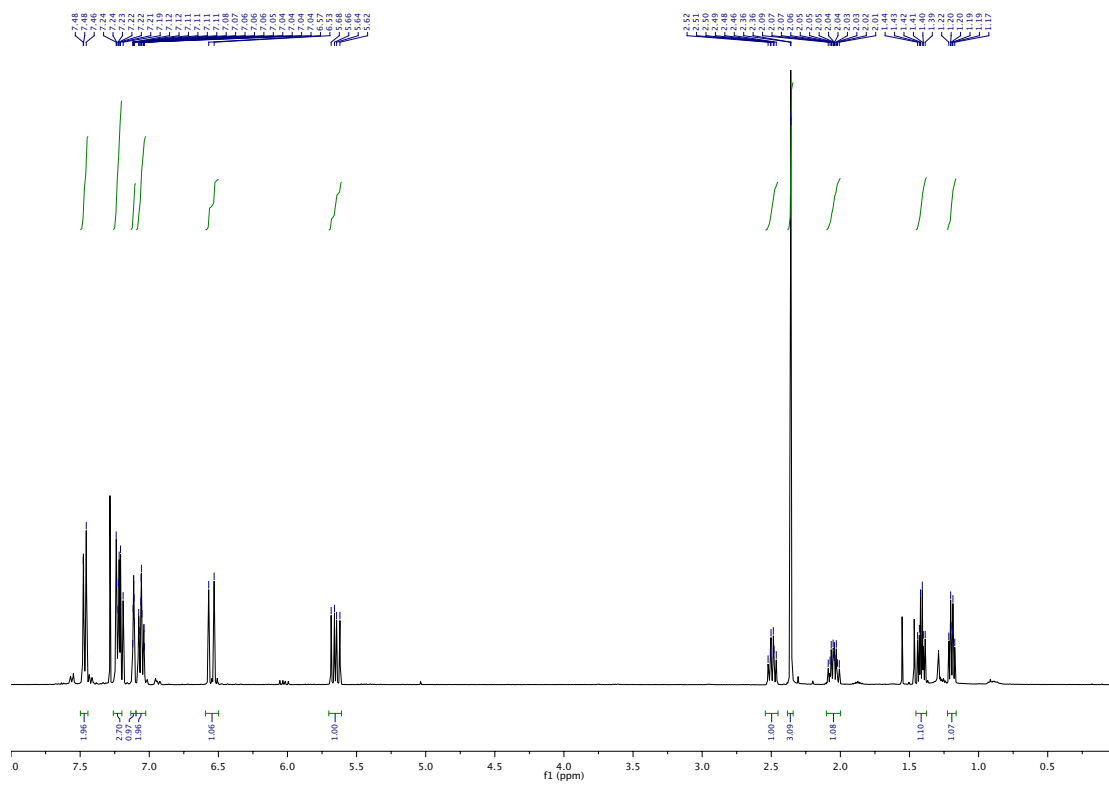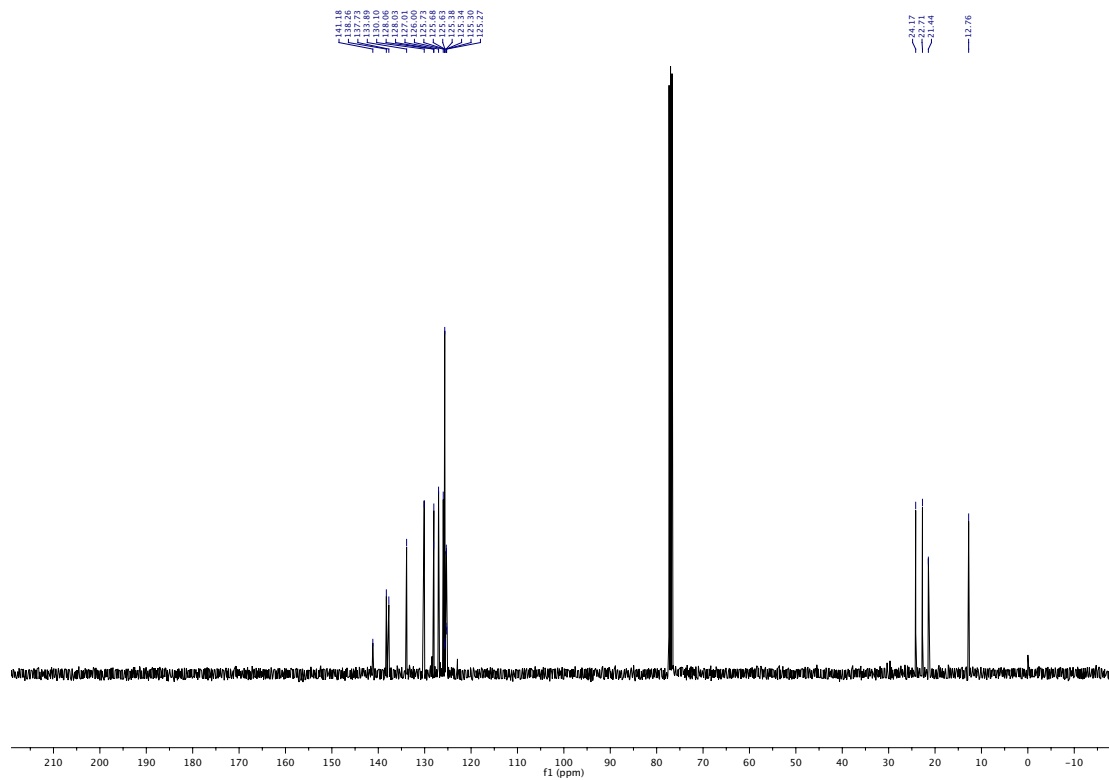



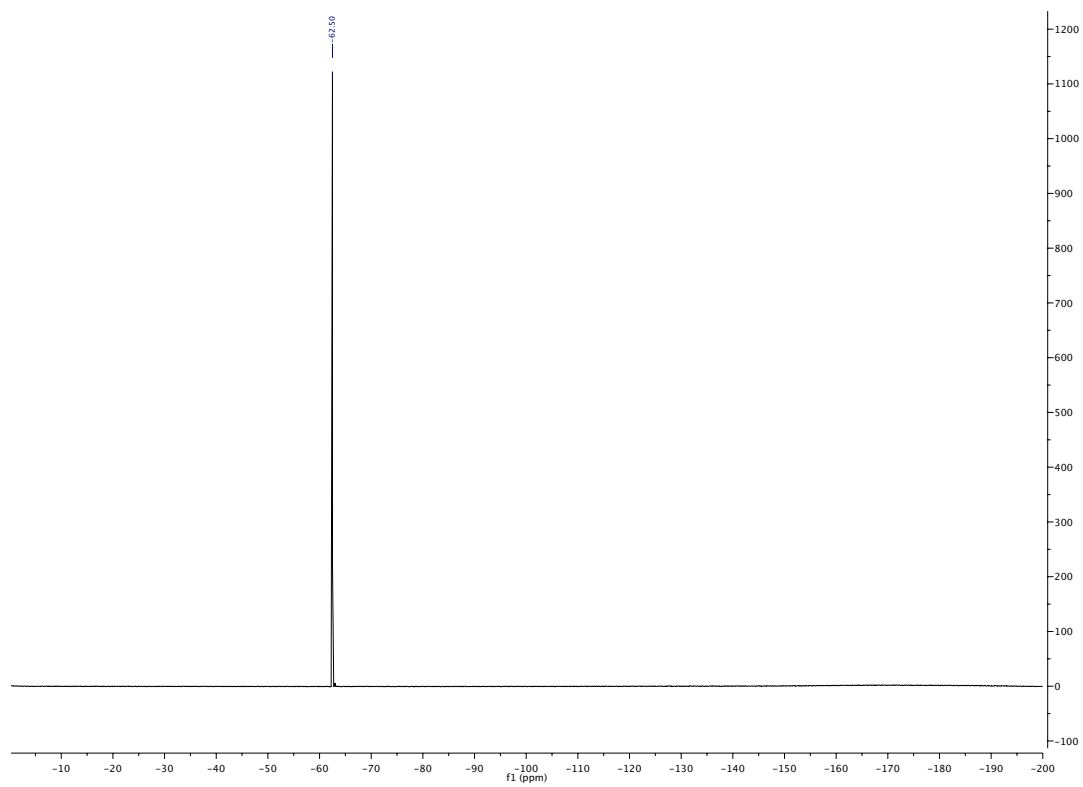

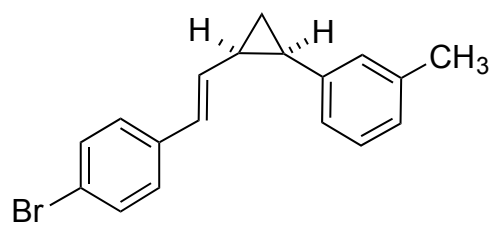

**3ag**

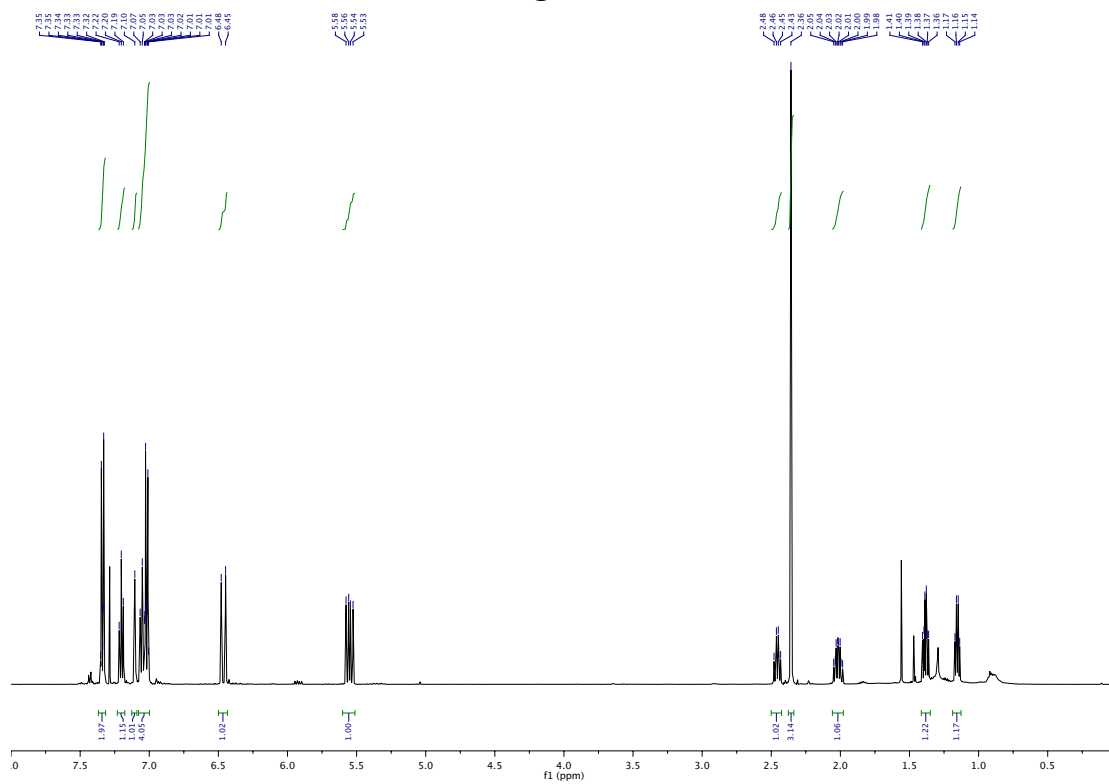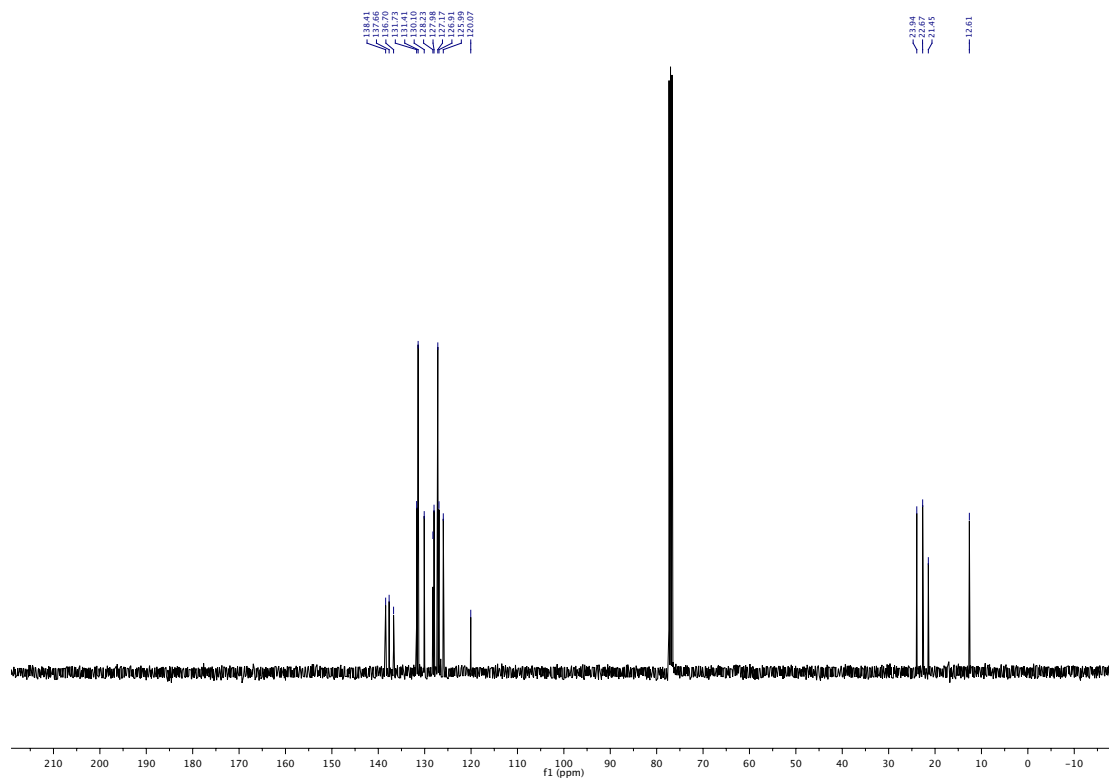

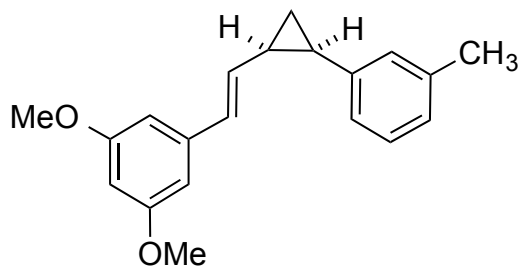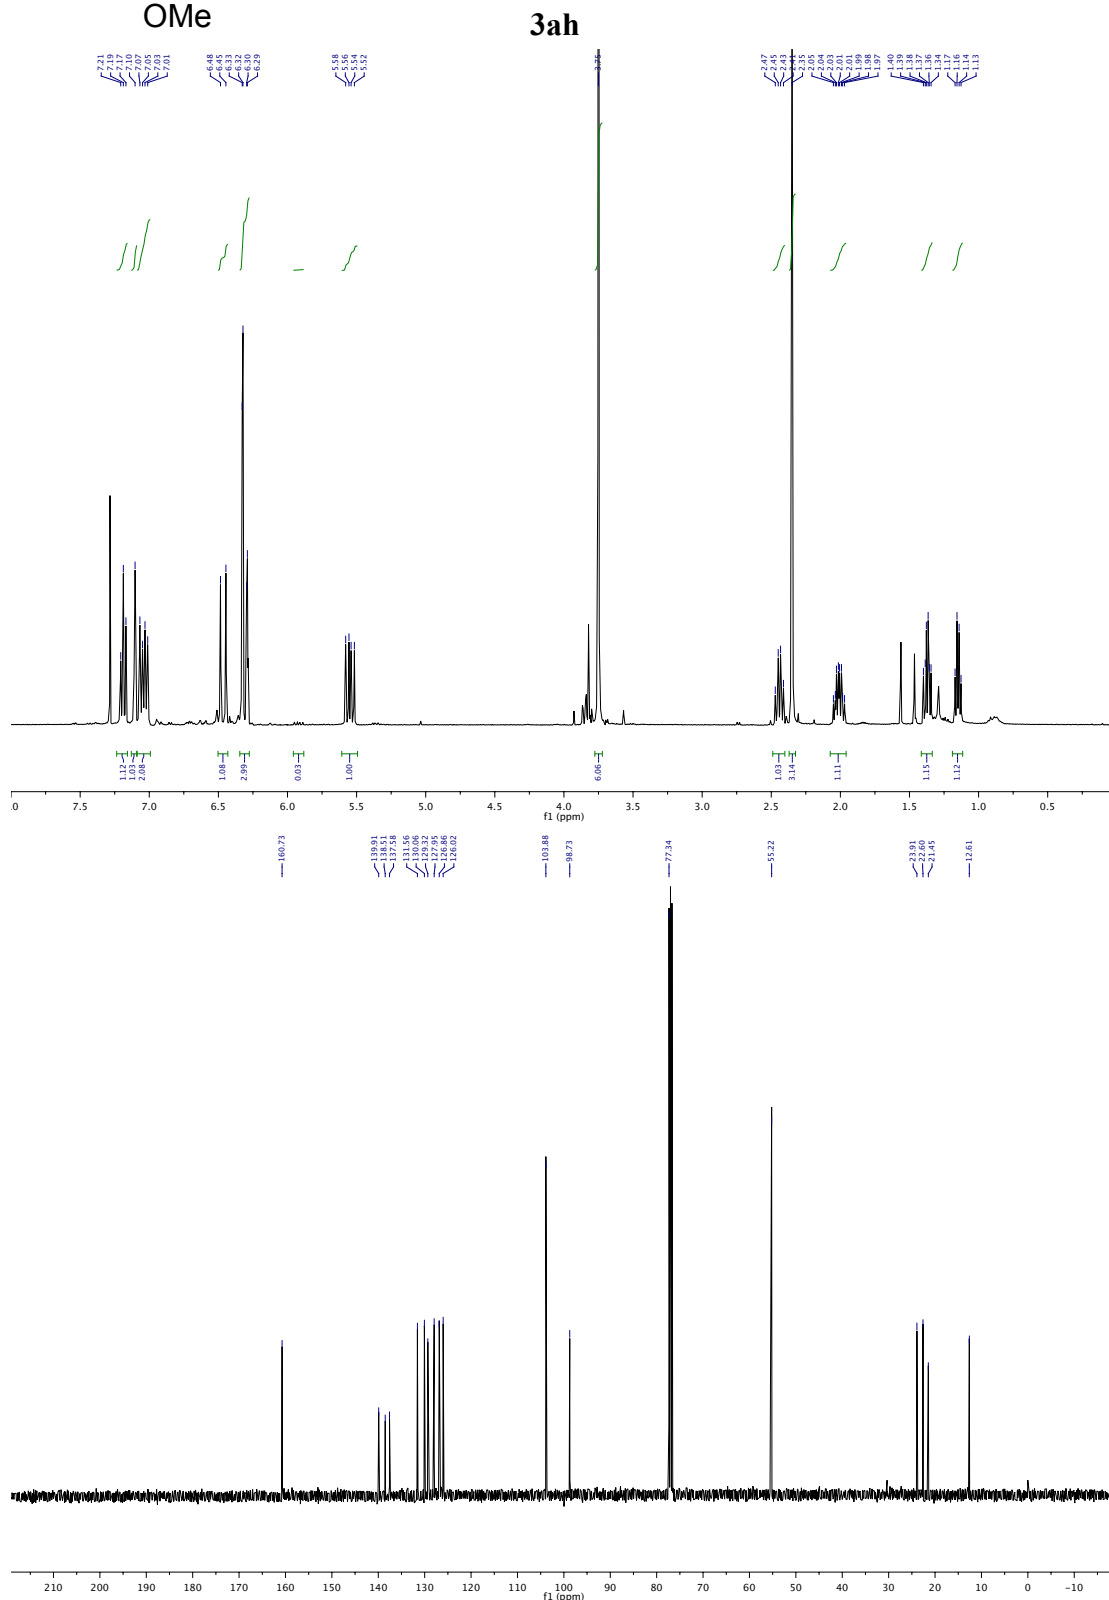

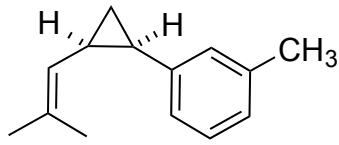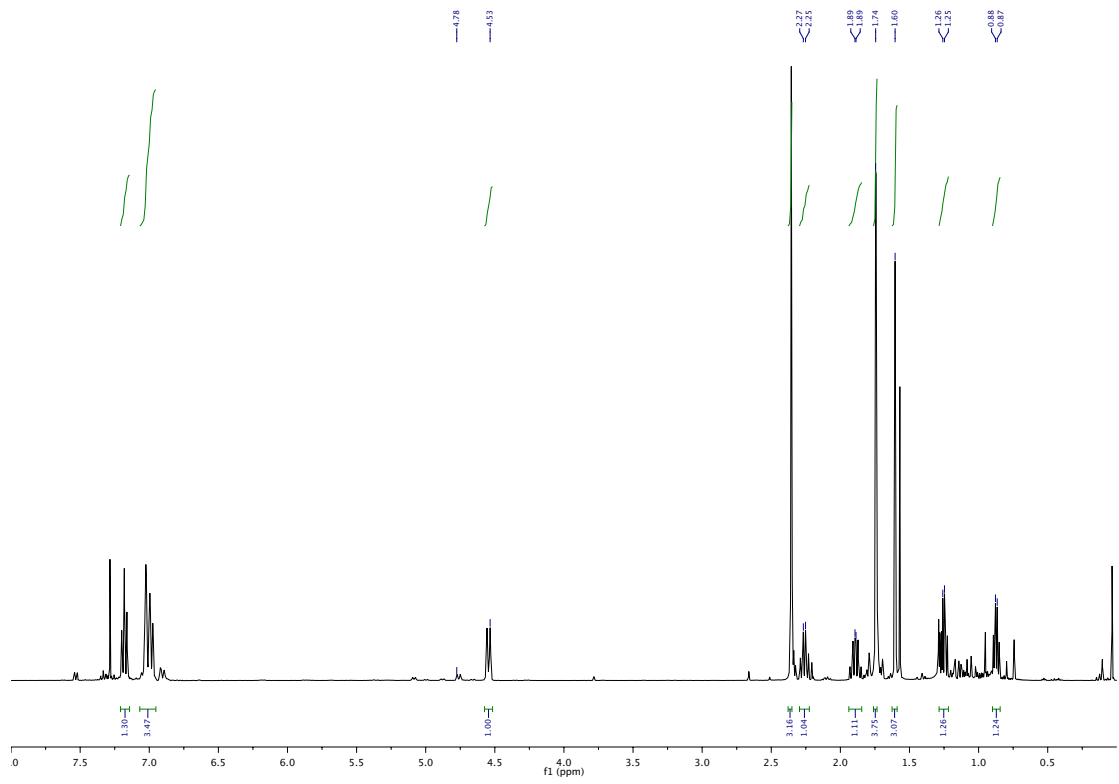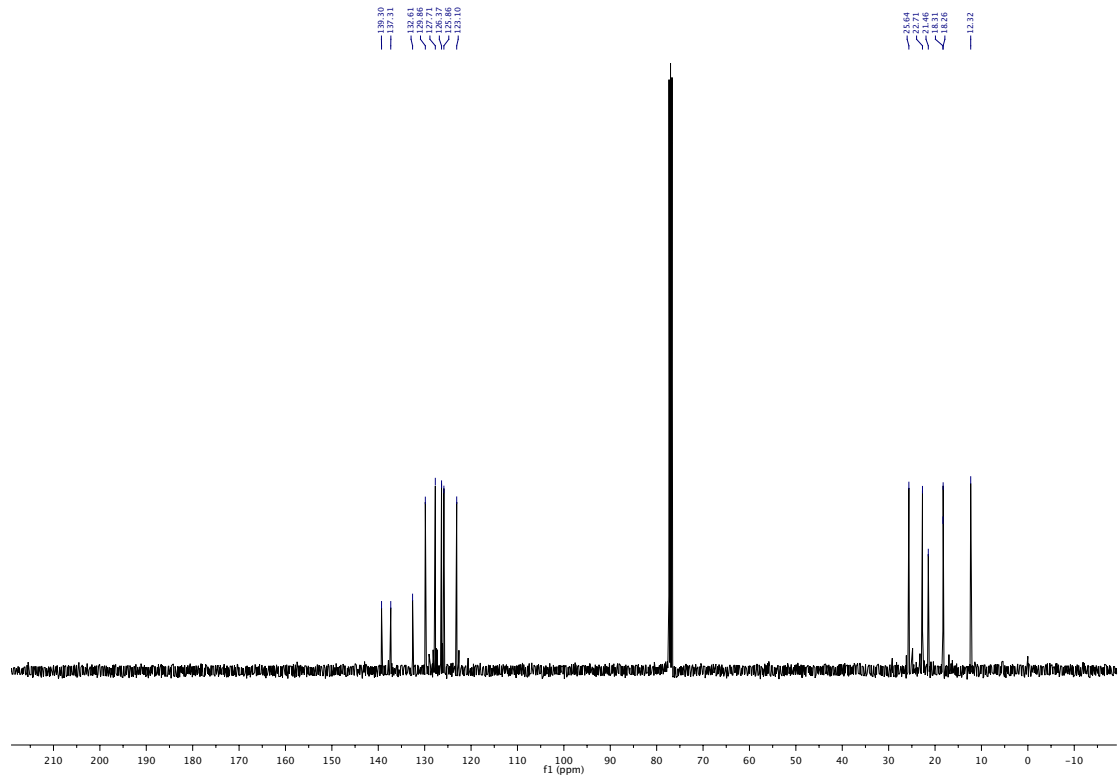

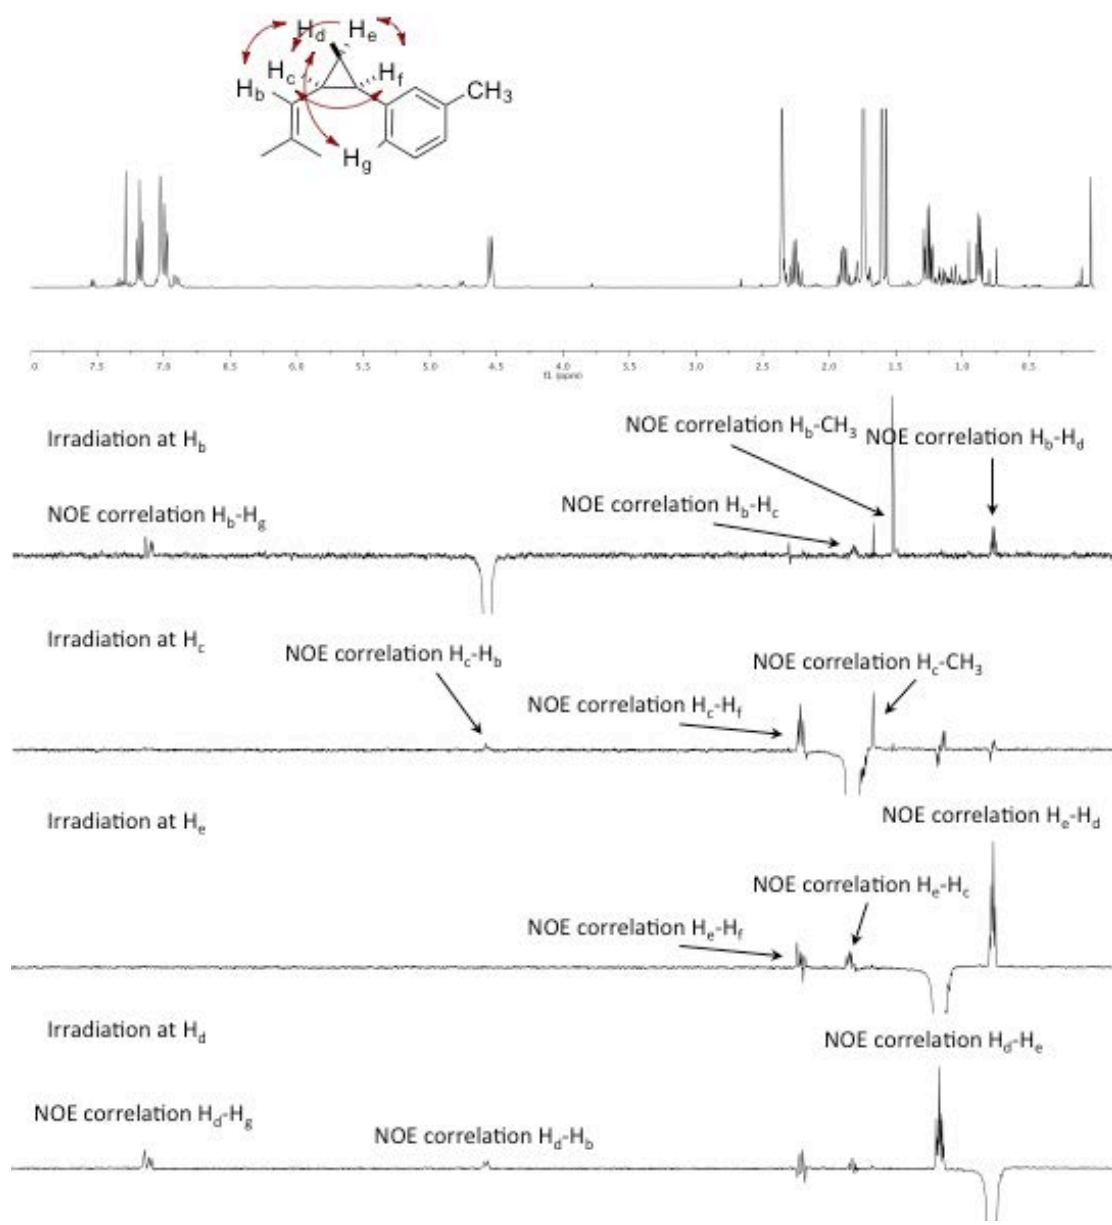

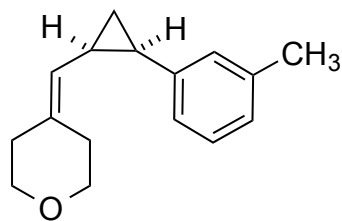

3aj

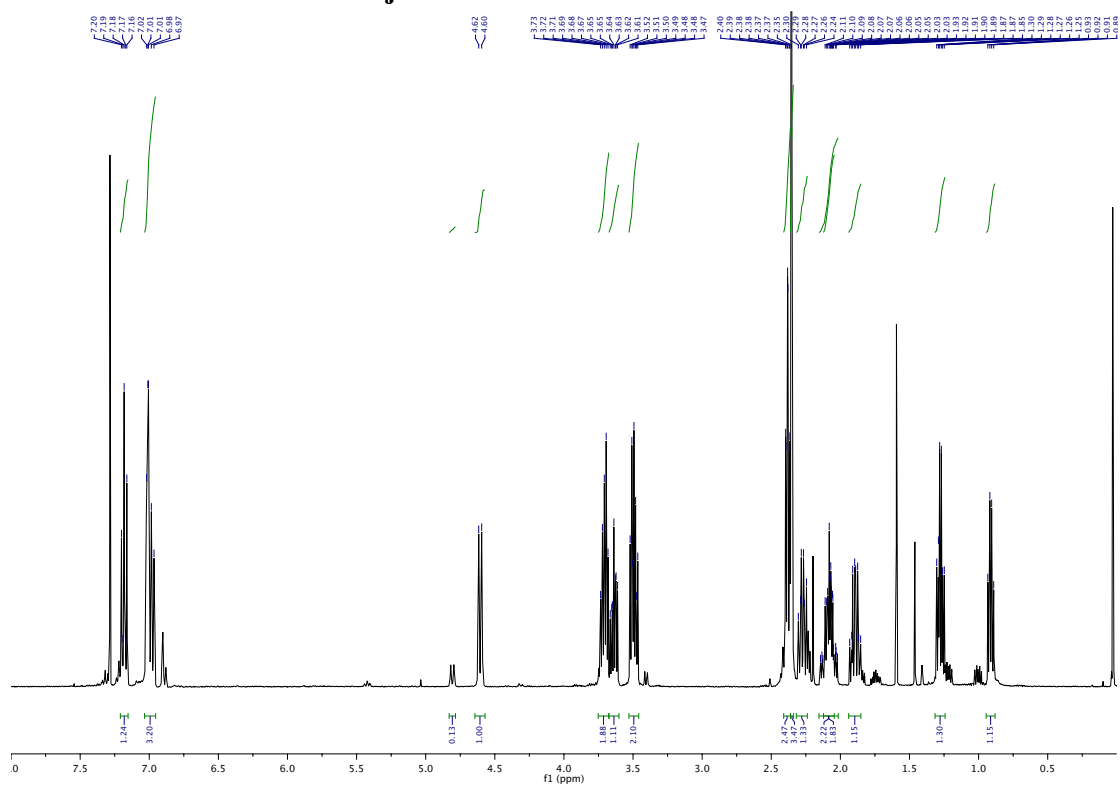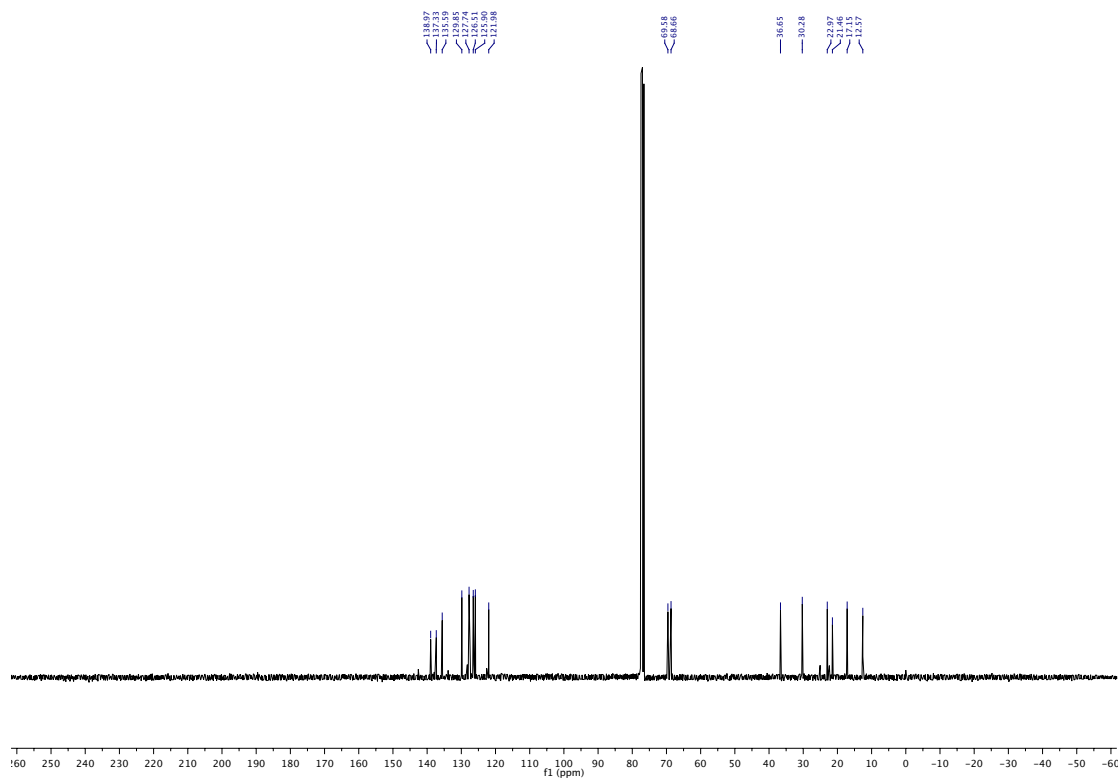

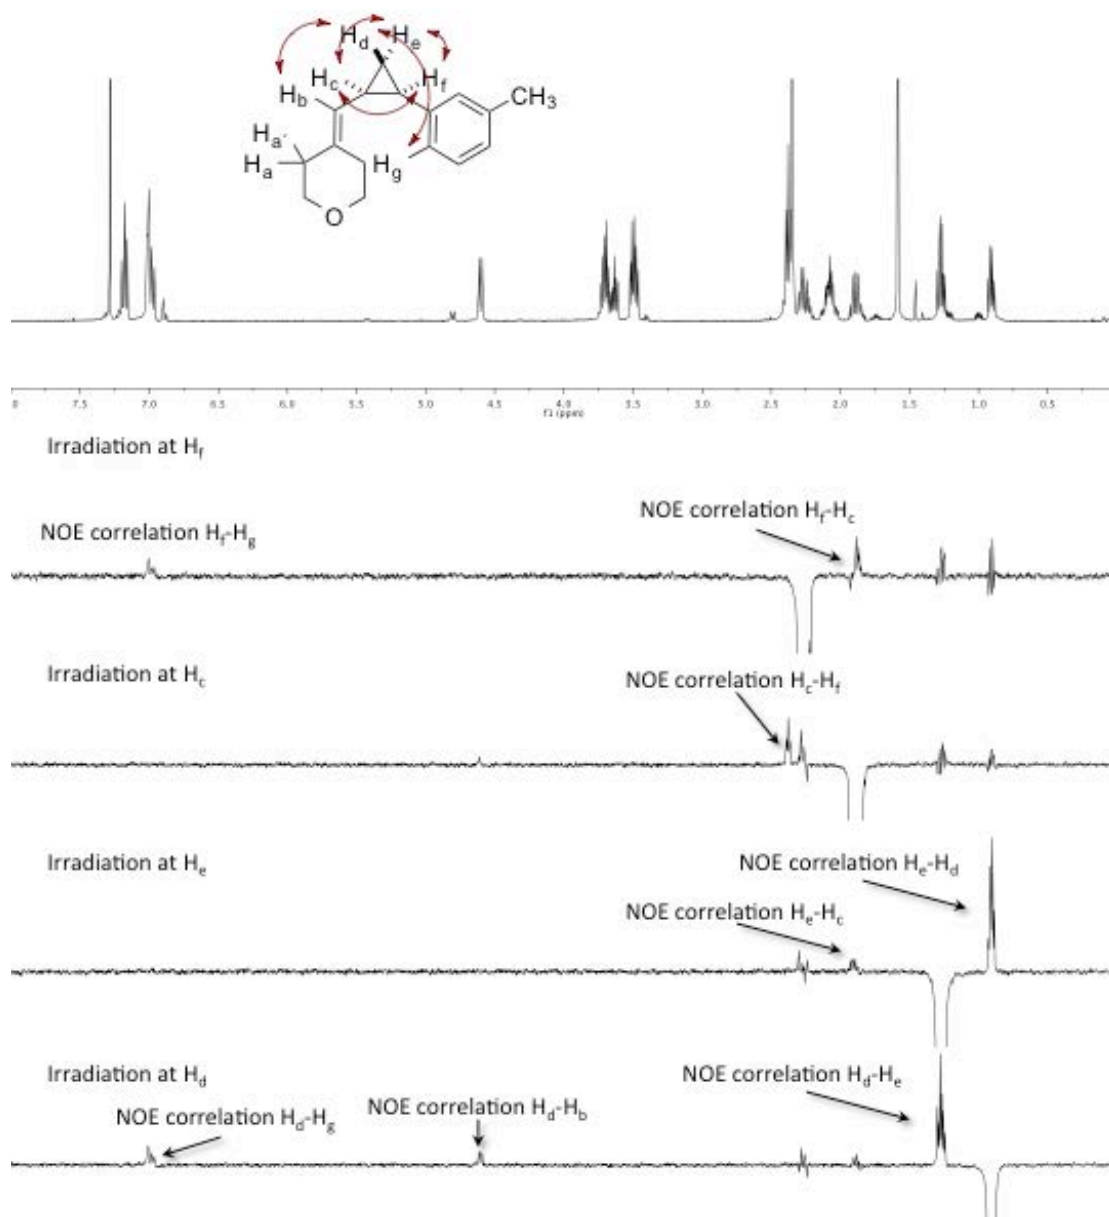

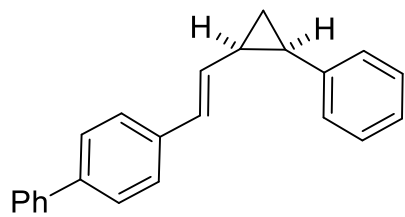

ph276-1  
 ResearchGroup Echavarren  
 ICIQ\_1H12p8s CDCl3 /opt/topspin pholstein 28

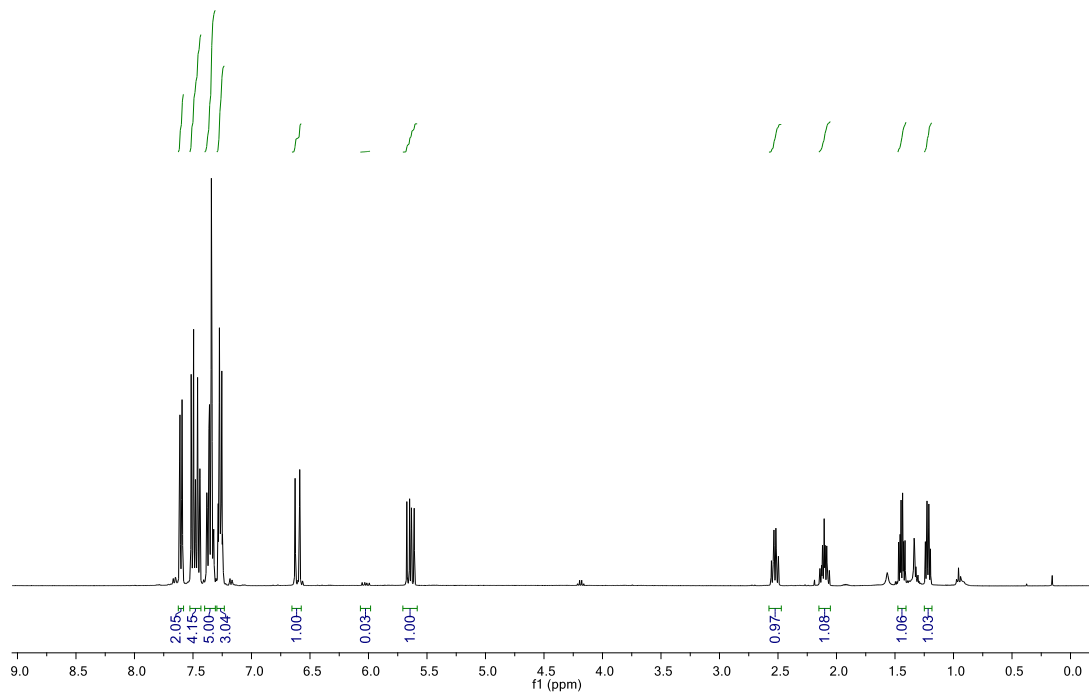

ph276-1  
 ResearchGroup Echavarren  
 ICIQ\_13C(1H)512s CDCl3 (C:\Bruker\topspin\pholstein 28)

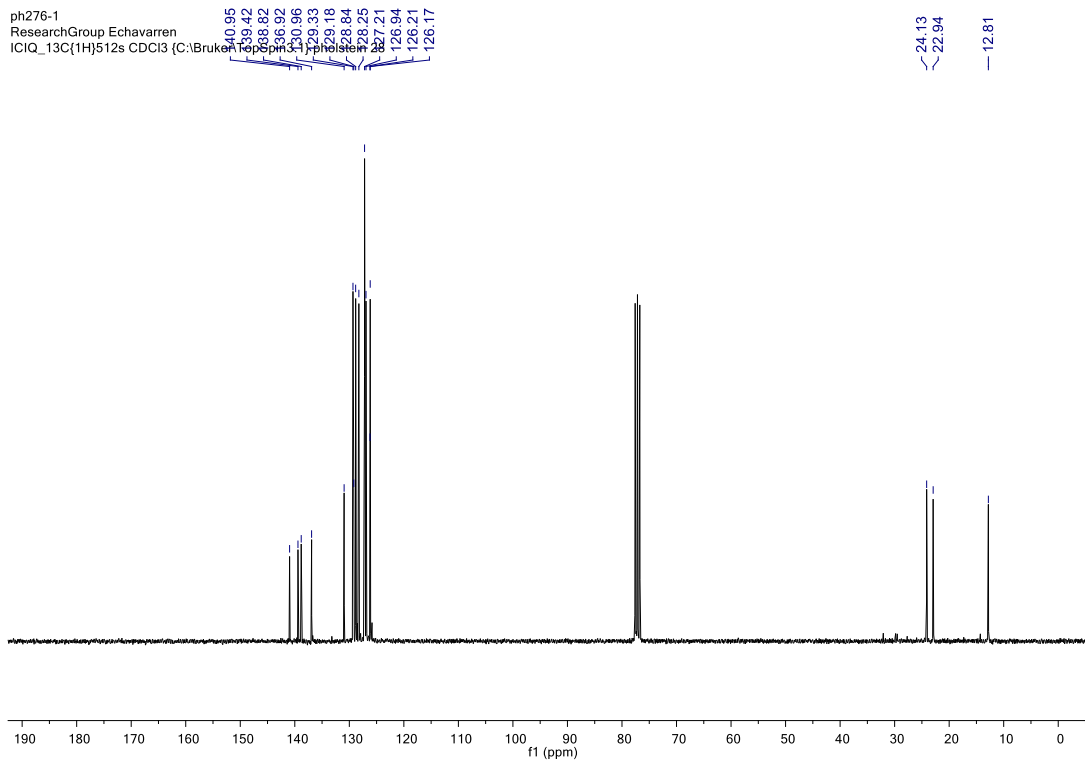



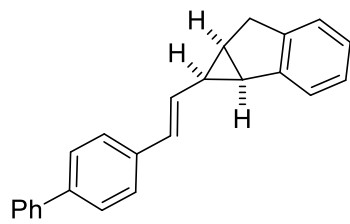

**3al**

ph272-2  
 ResearchGroup Echavarren  
 ICIQ\_1H12p8s CDCl3 /opt/topspin pholstein 30

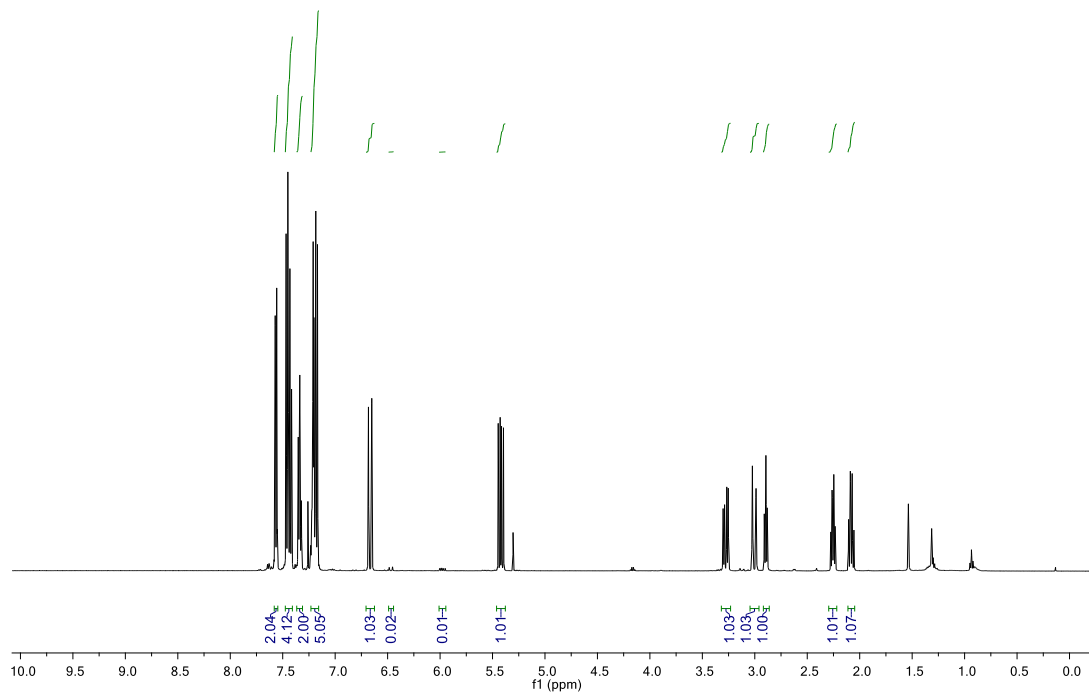

143.74  
 142.43  
 140.94  
 139.49  
 136.92  
 131.49  
 128.84  
 127.21  
 127.18  
 126.93  
 126.55  
 126.15  
 124.77  
 124.25

32.35  
 32.07  
 26.27  
 24.44

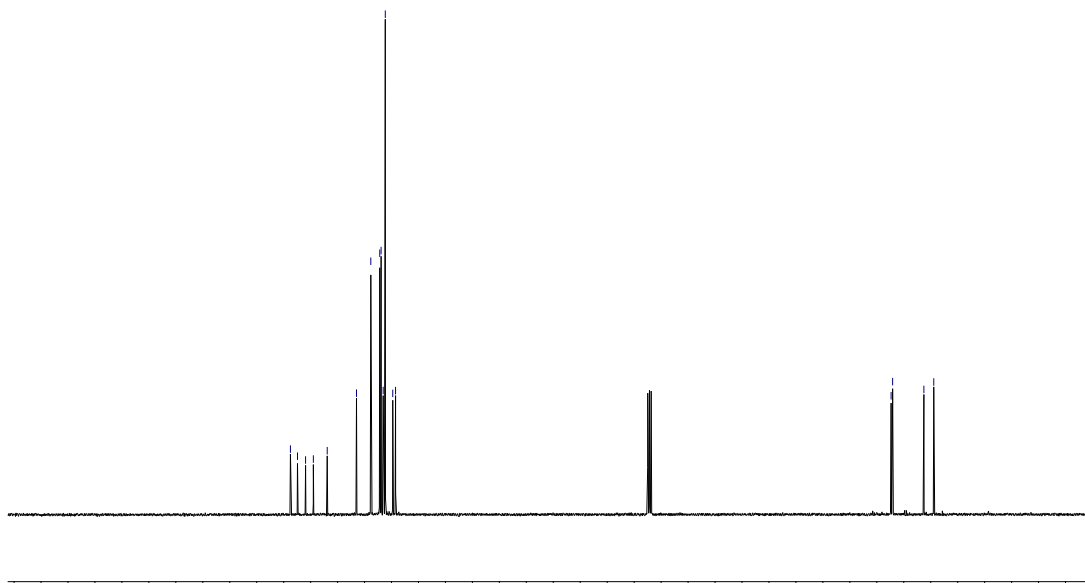

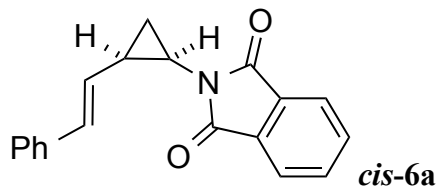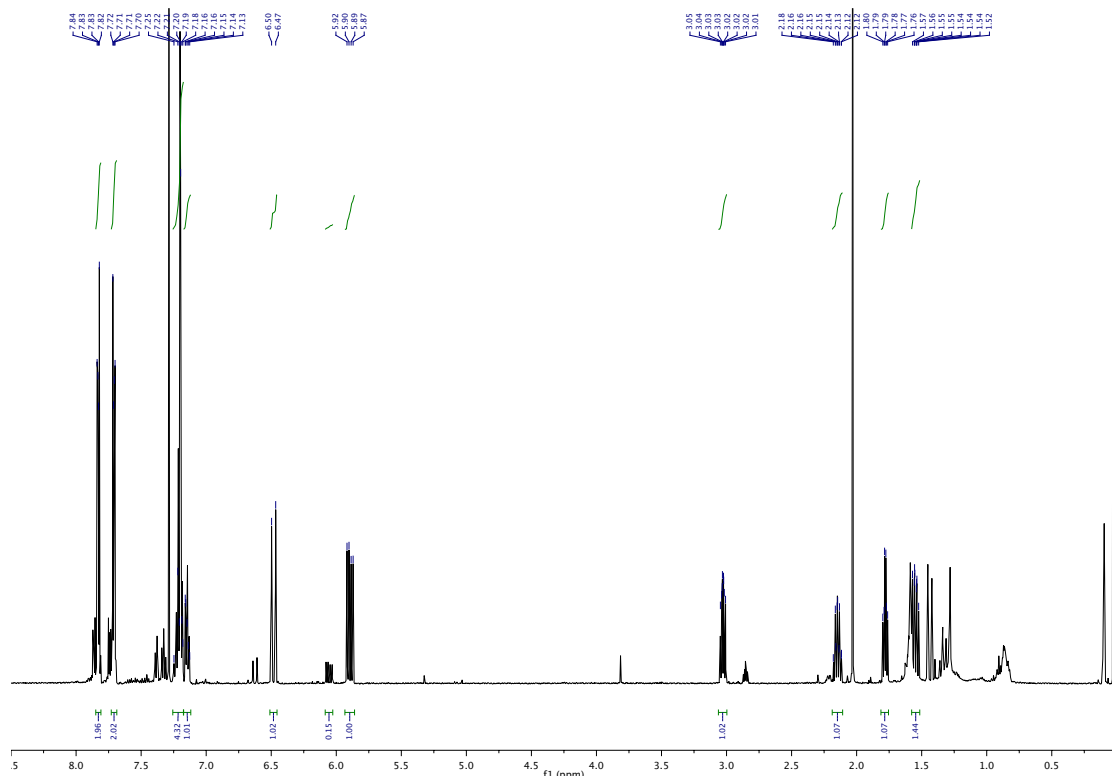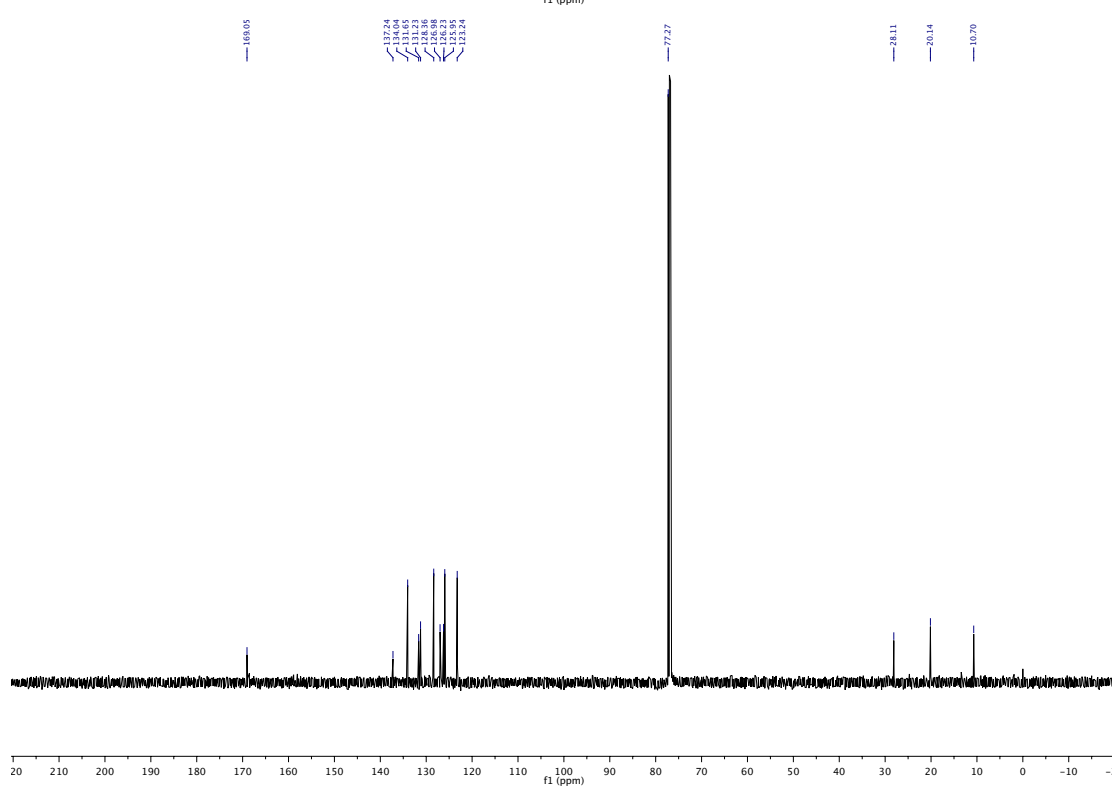

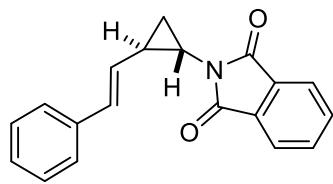

*trans-6a*

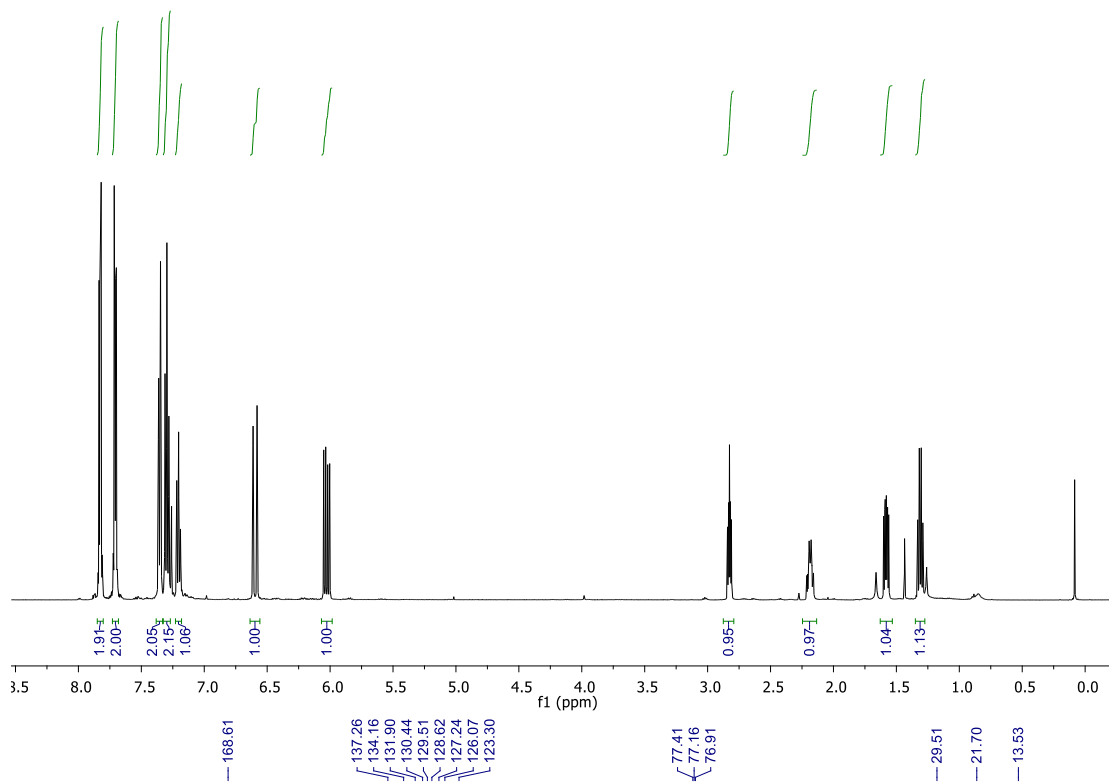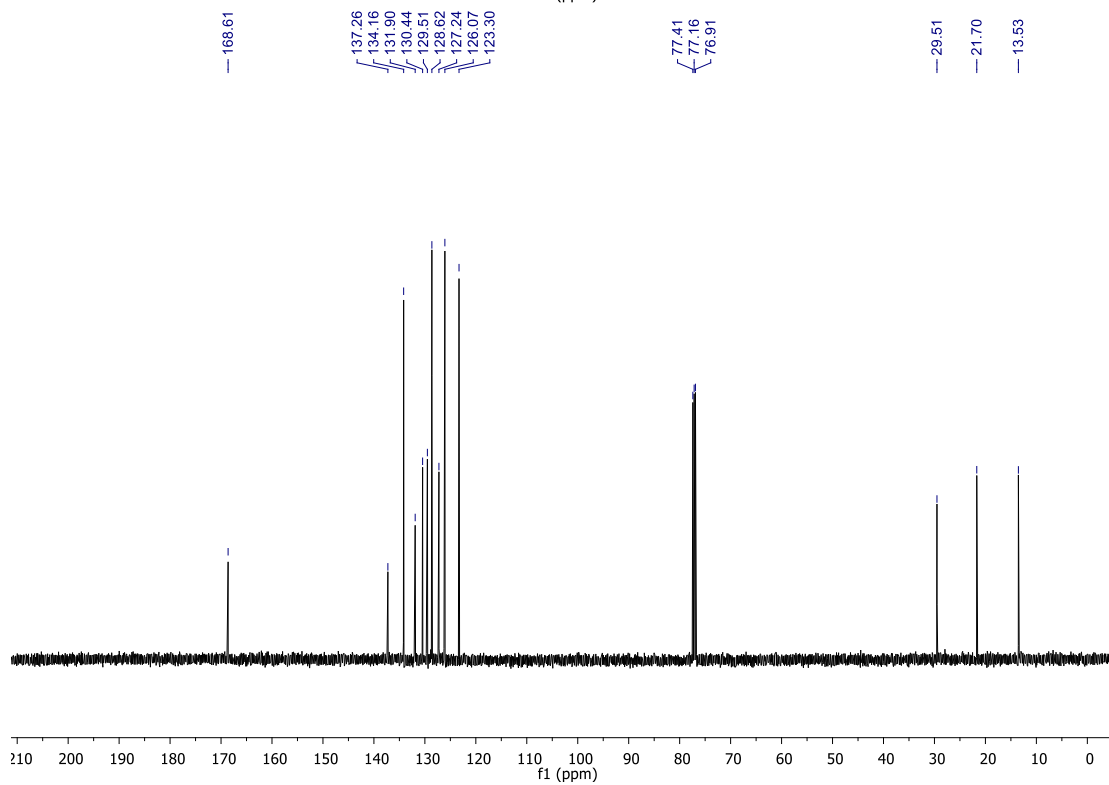

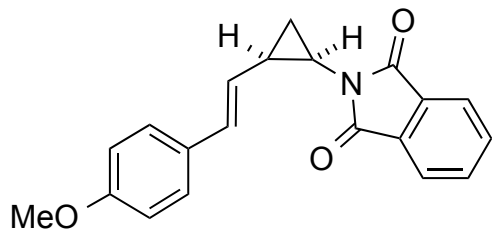

**6b**

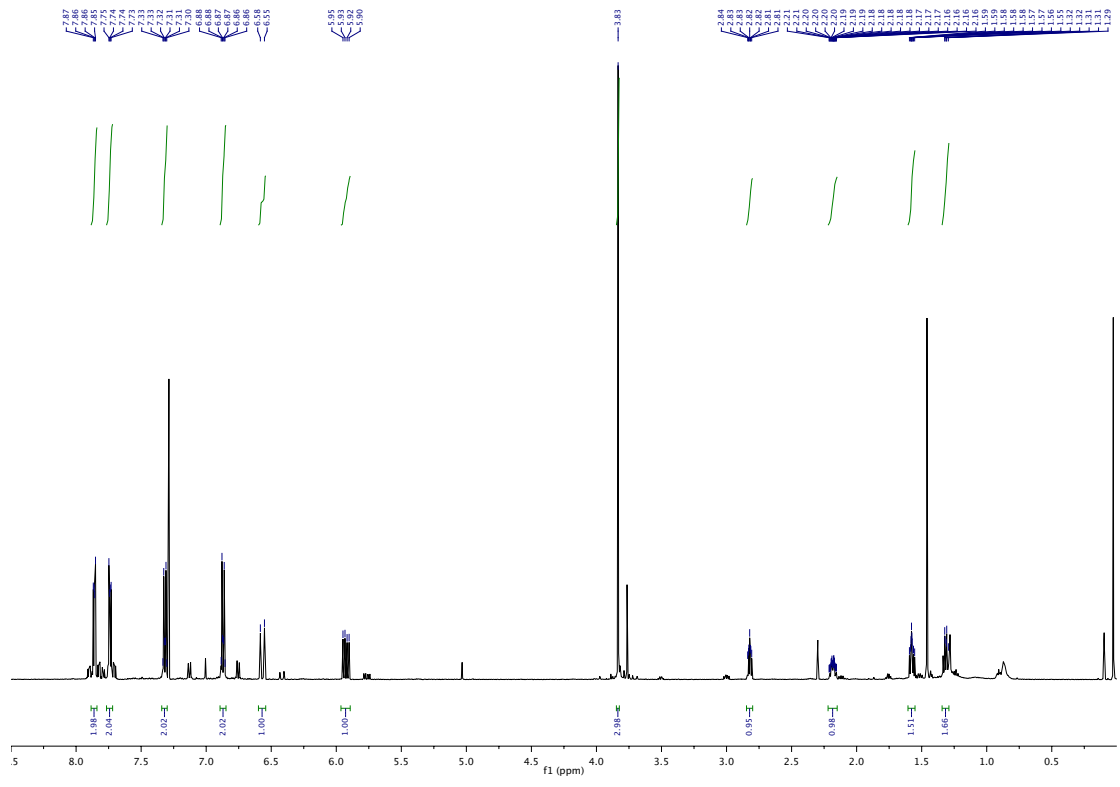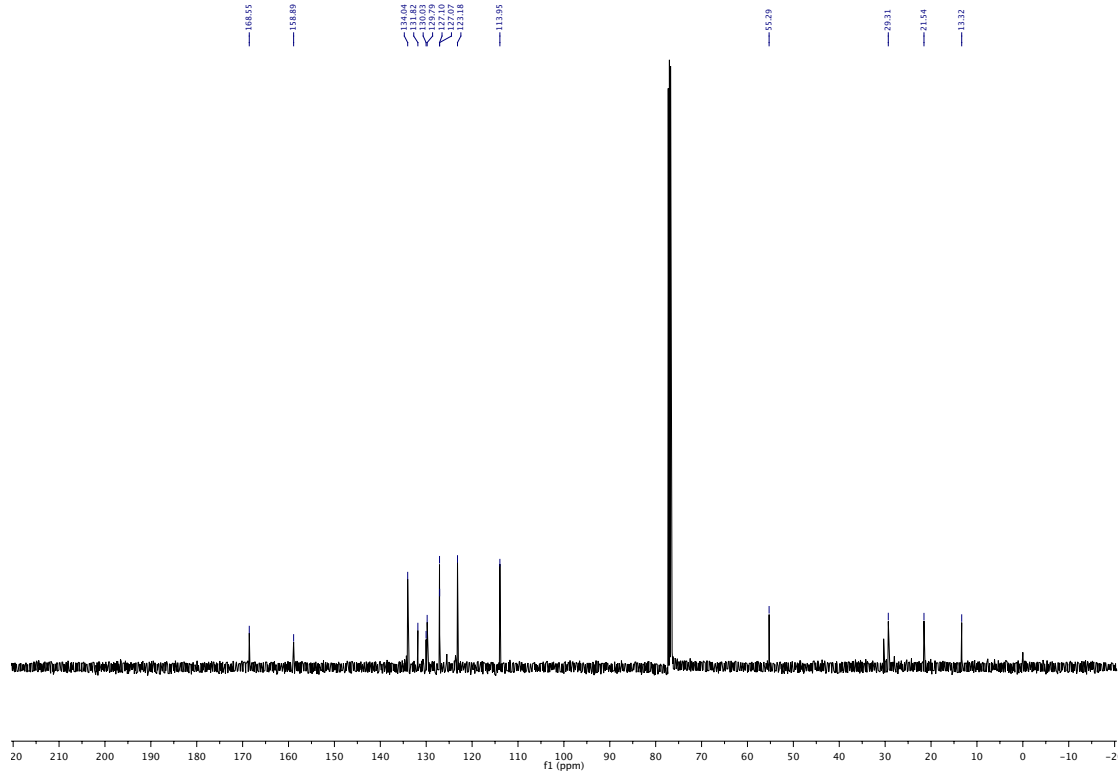

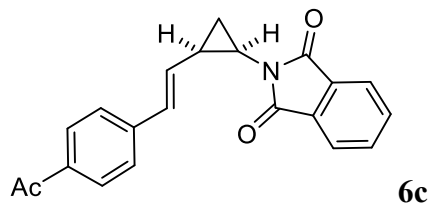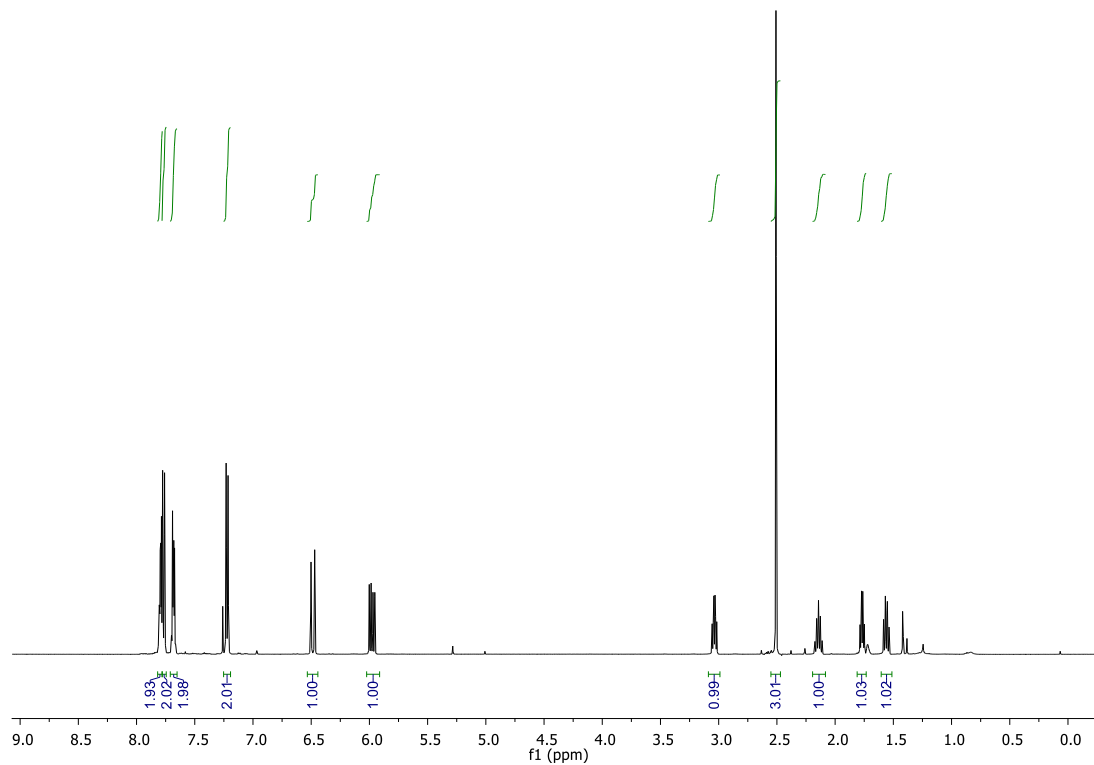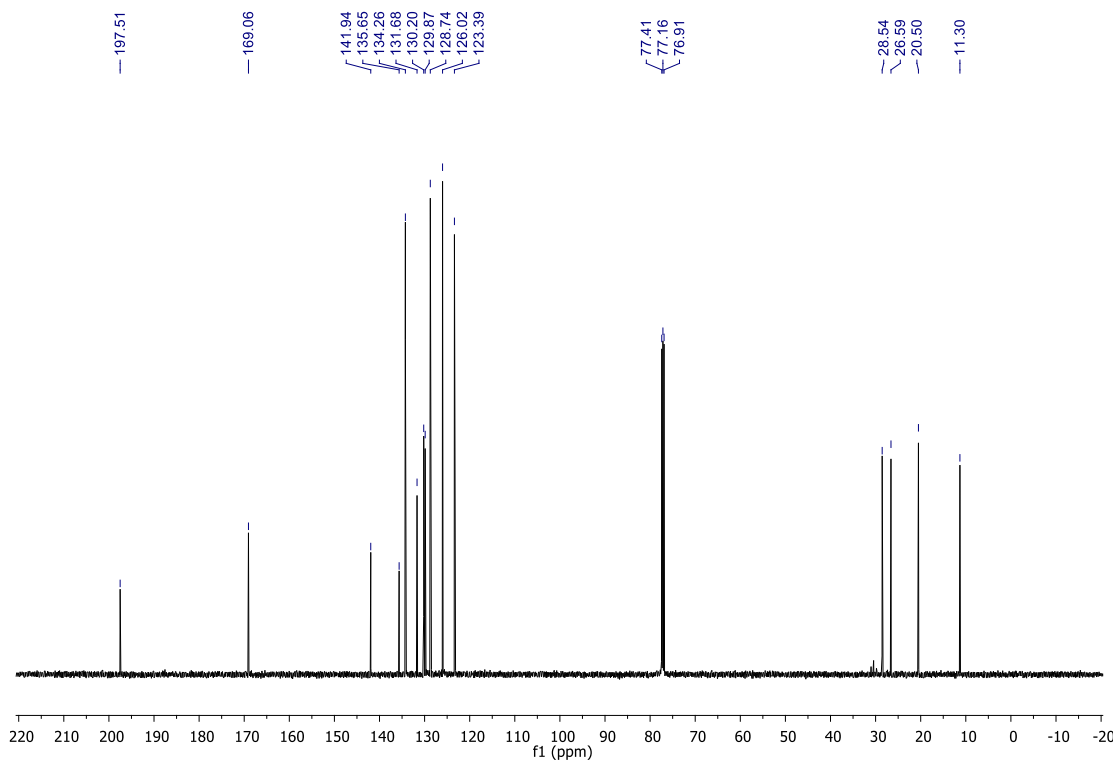

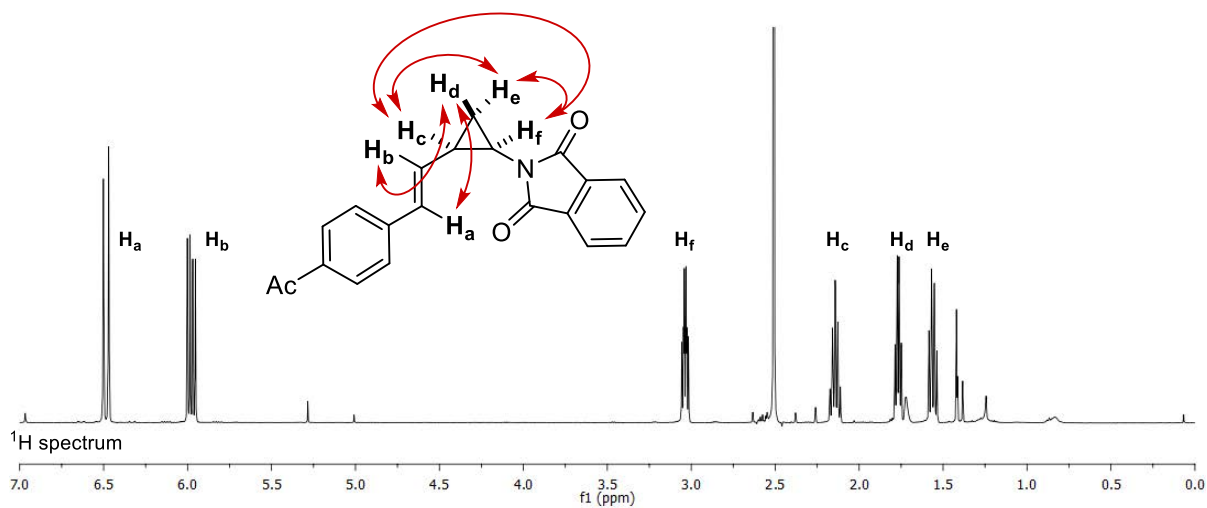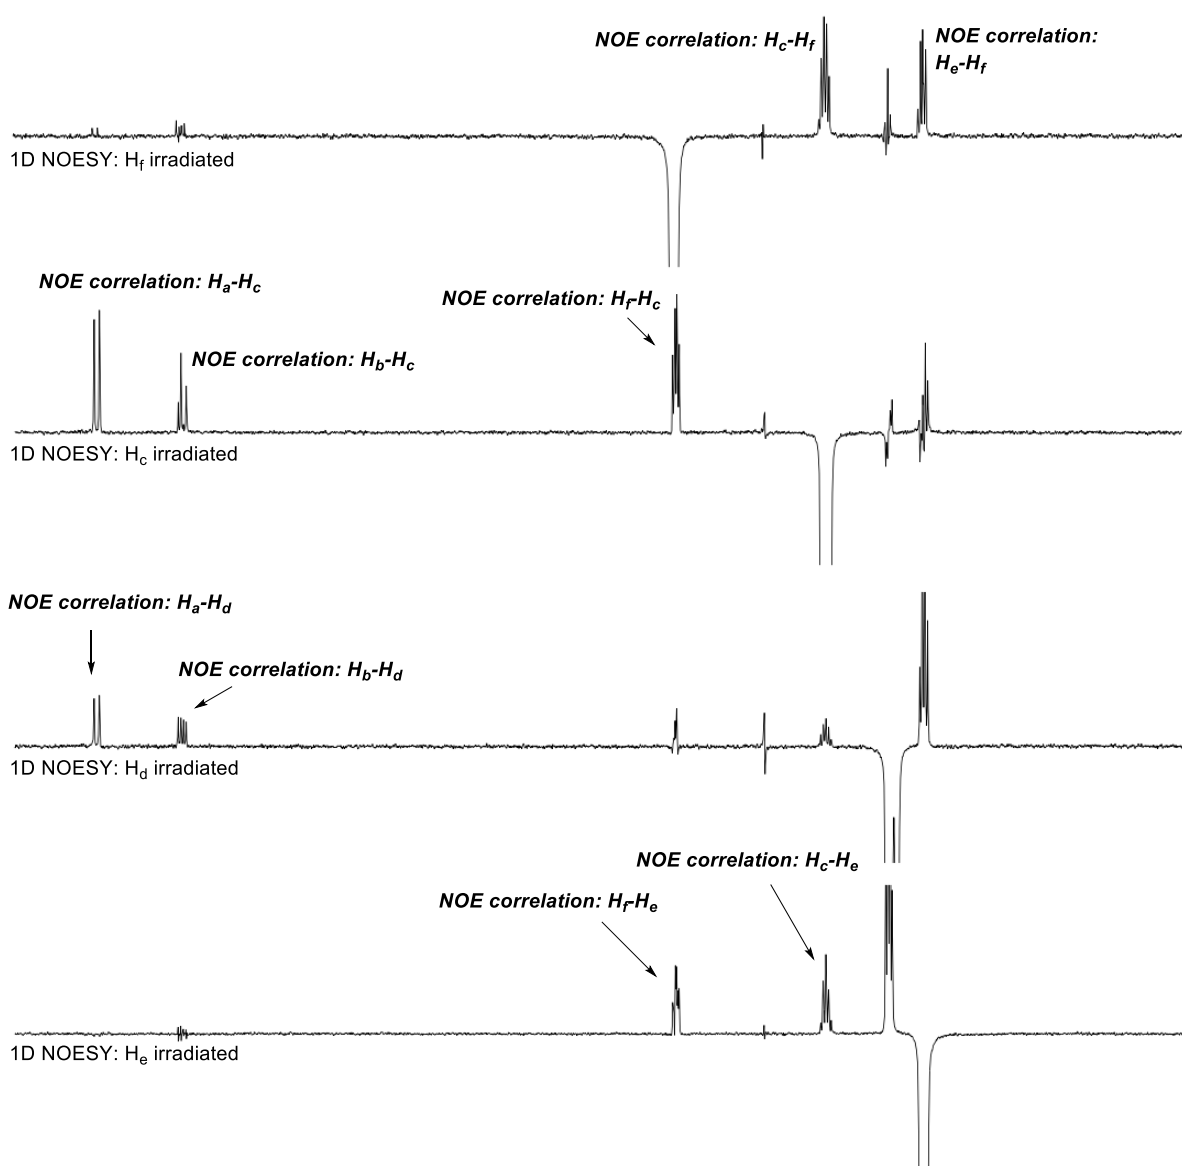

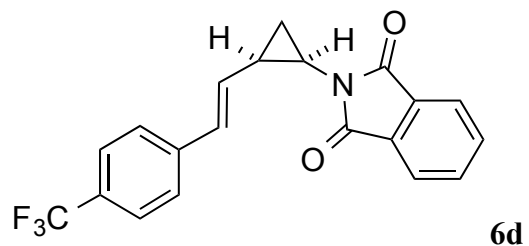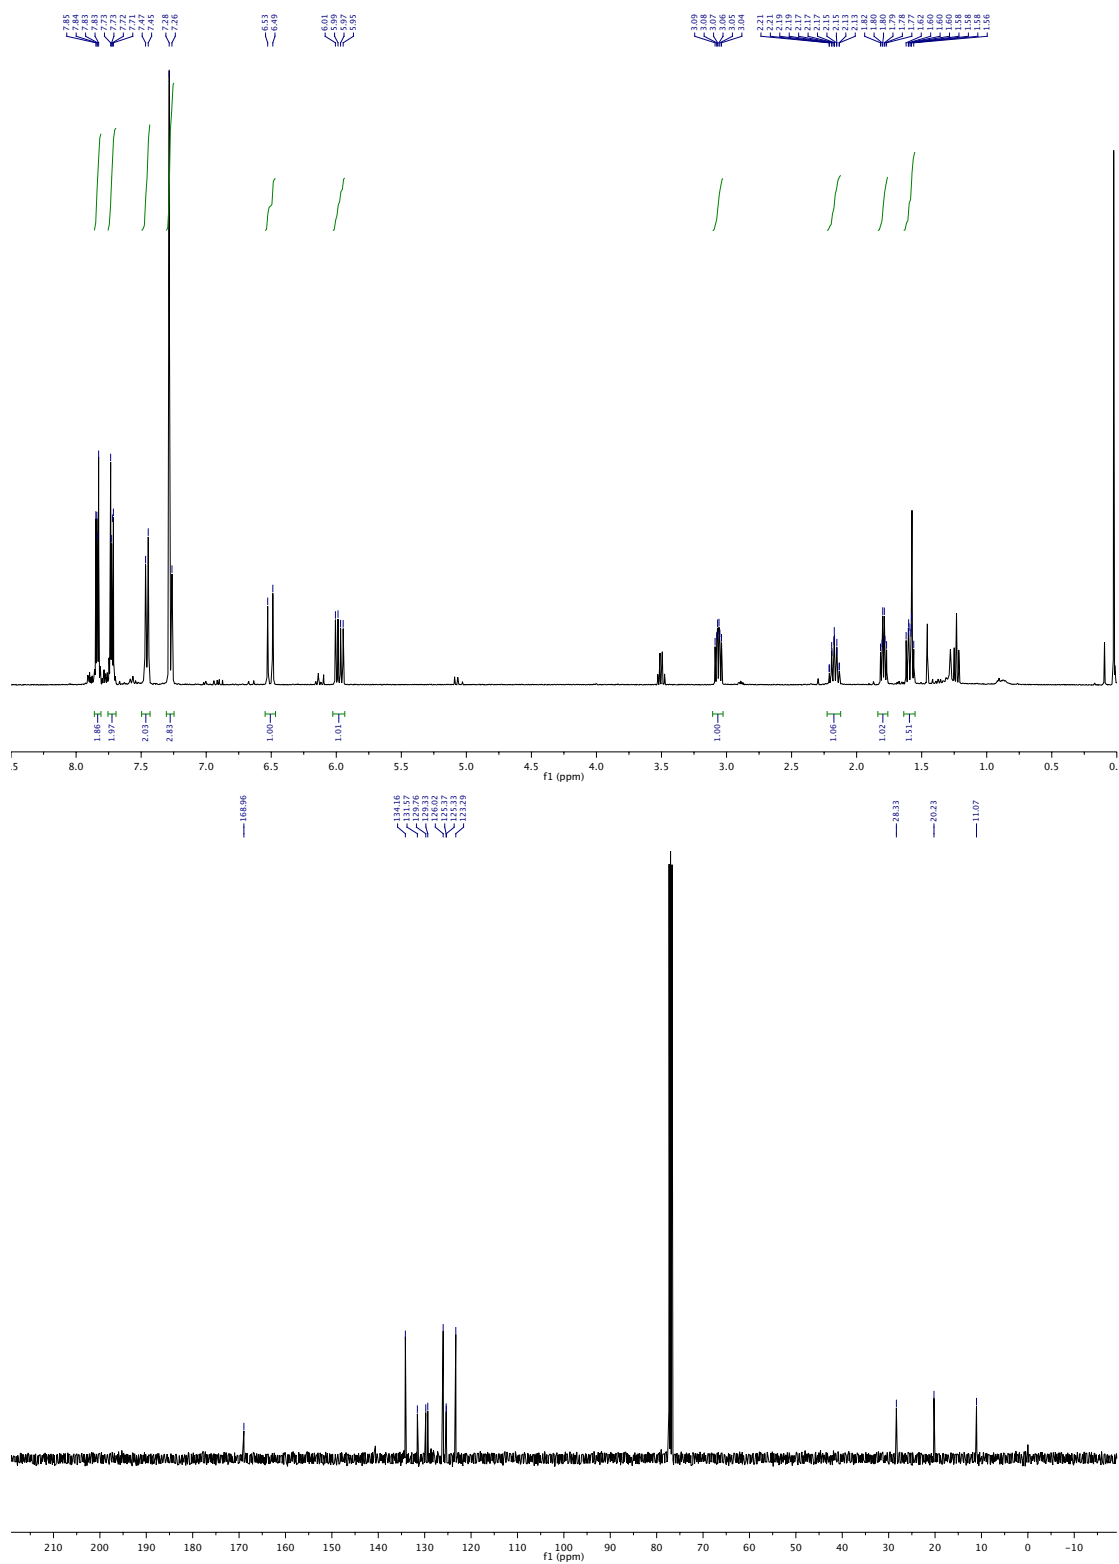

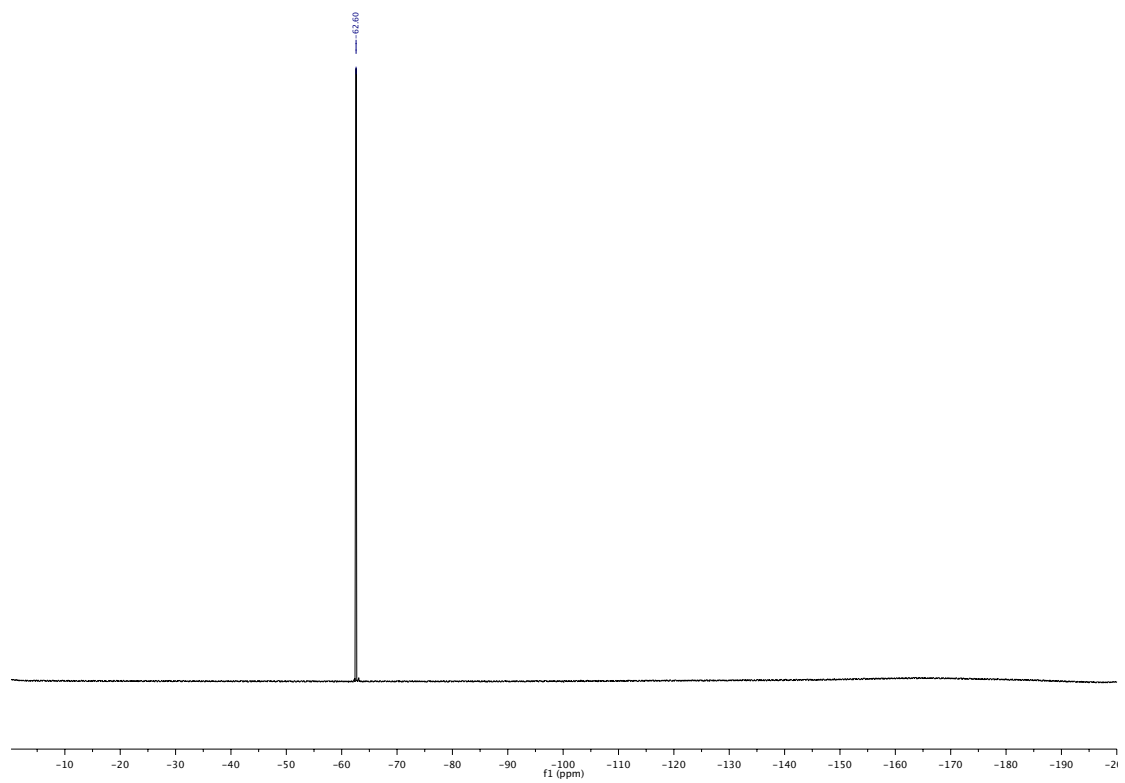



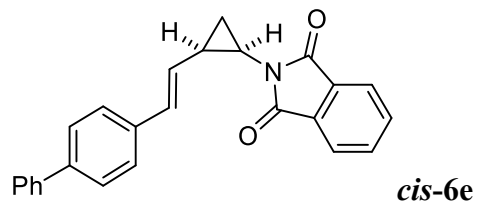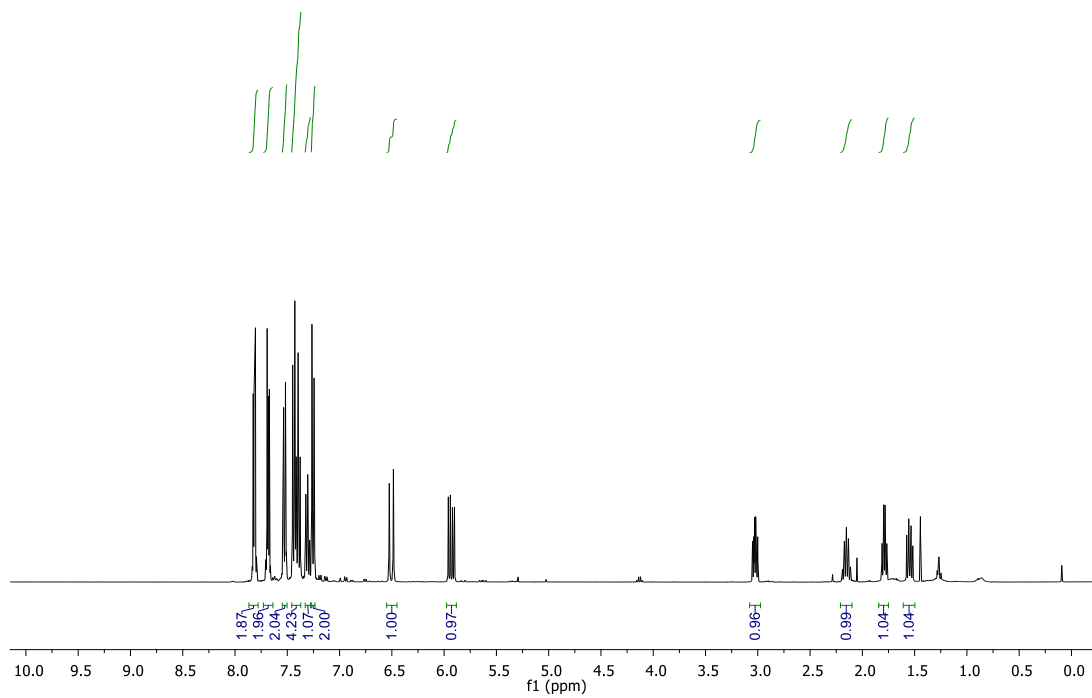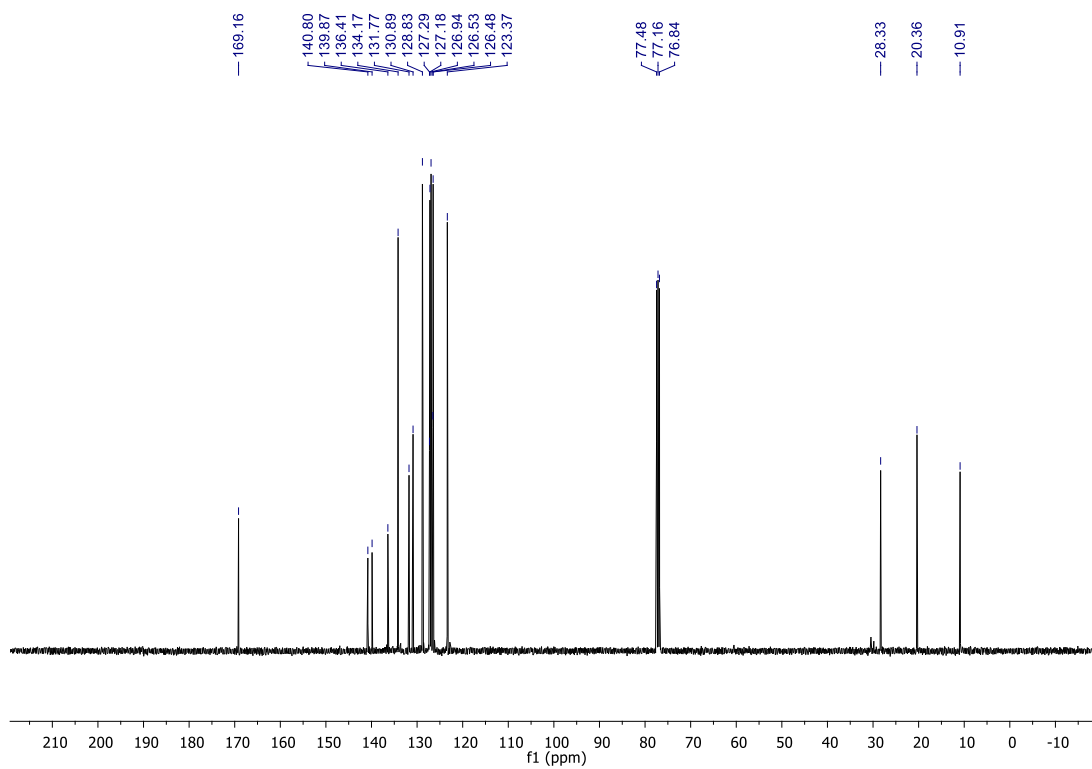

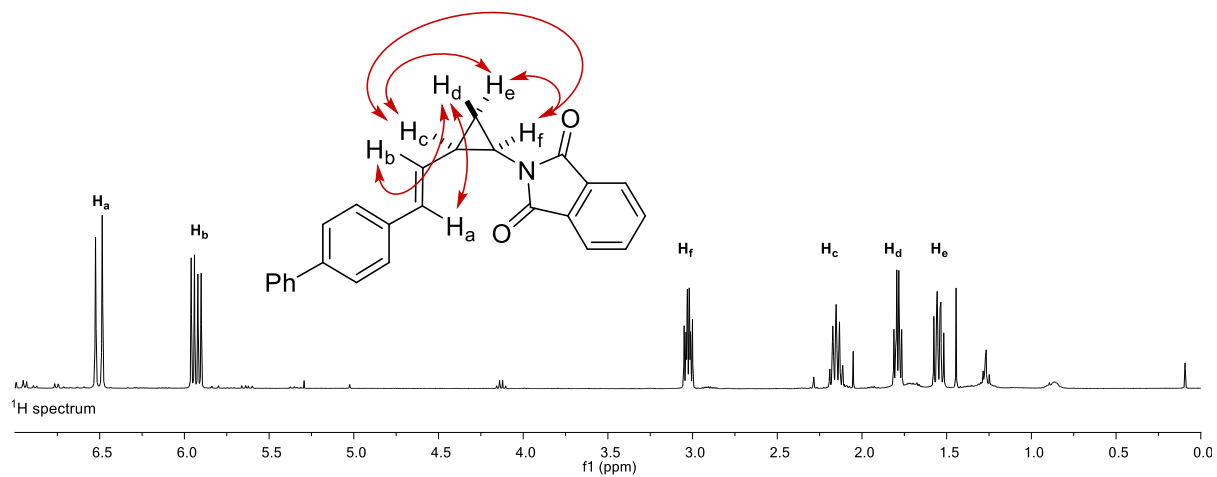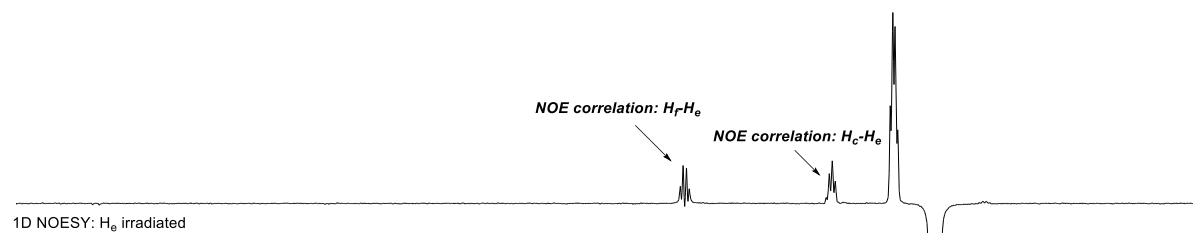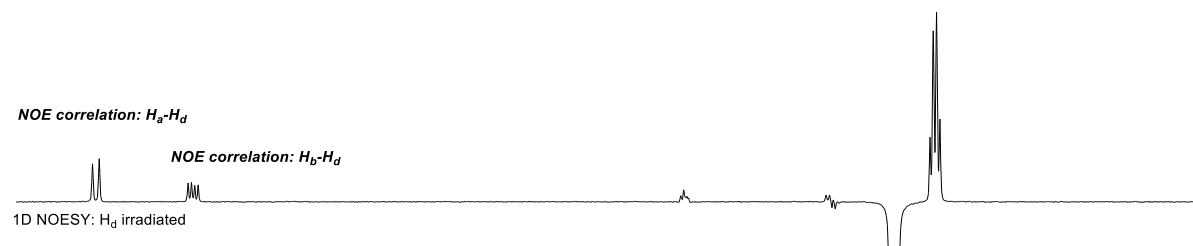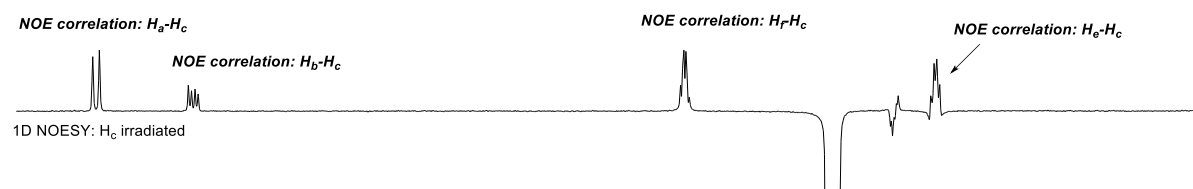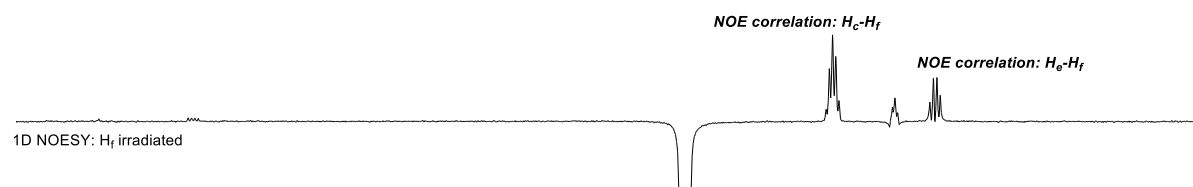

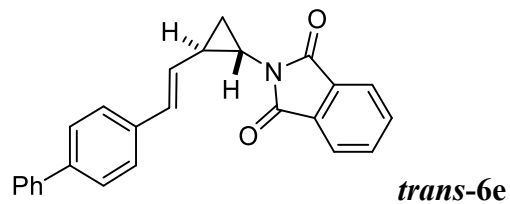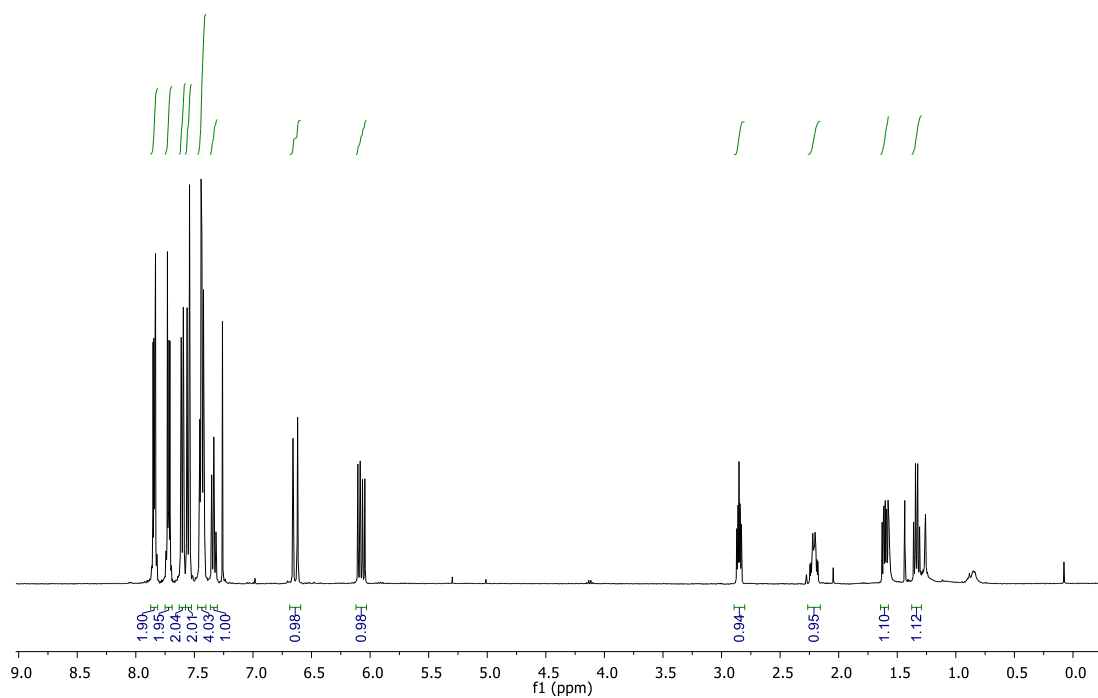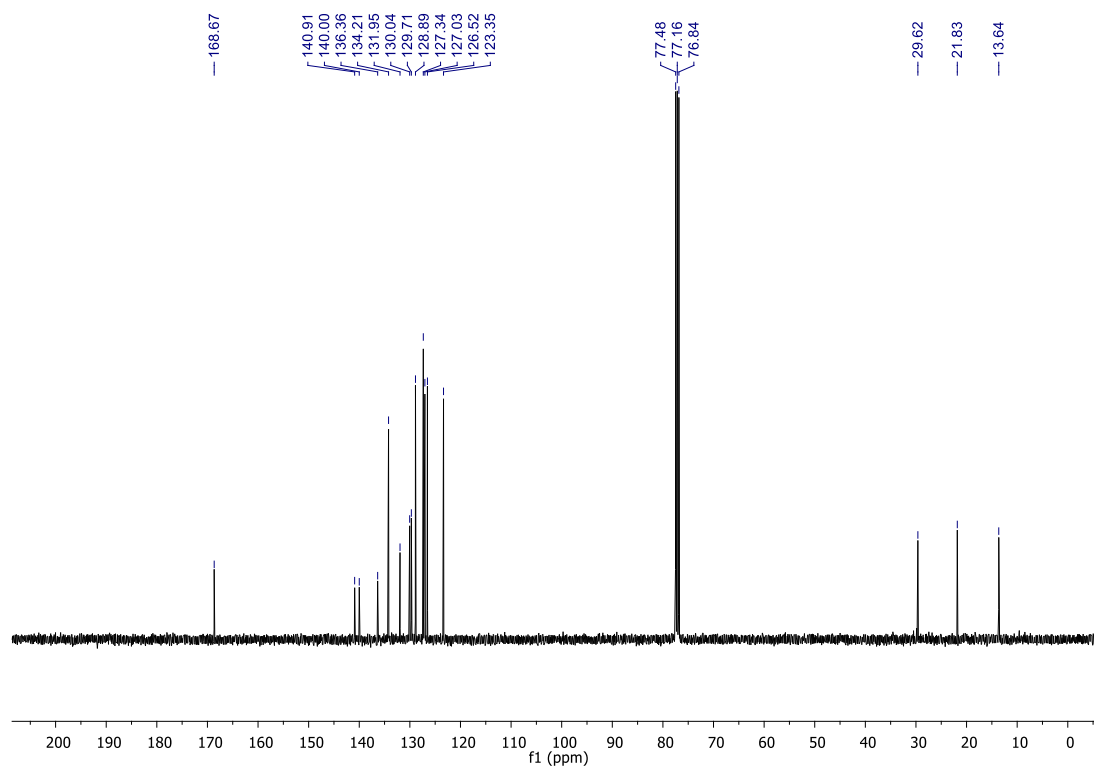

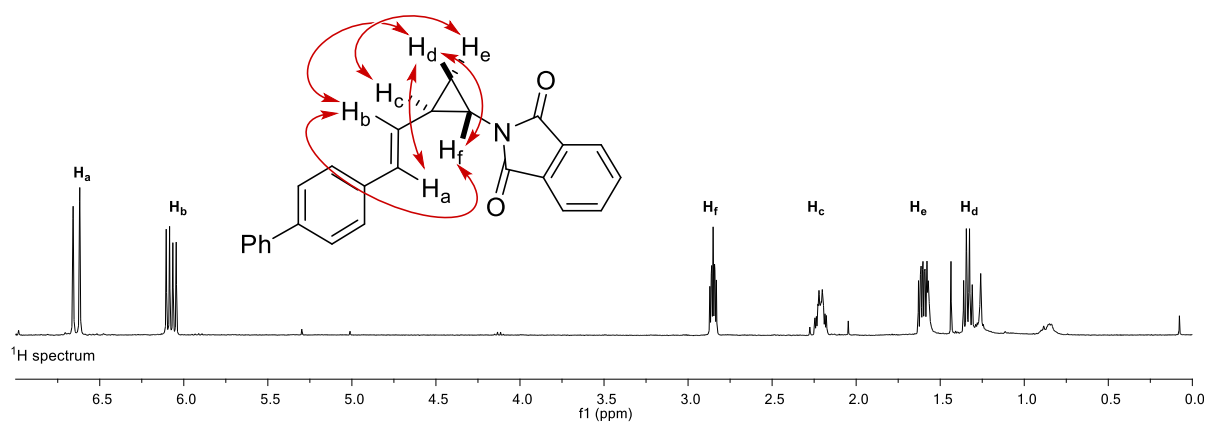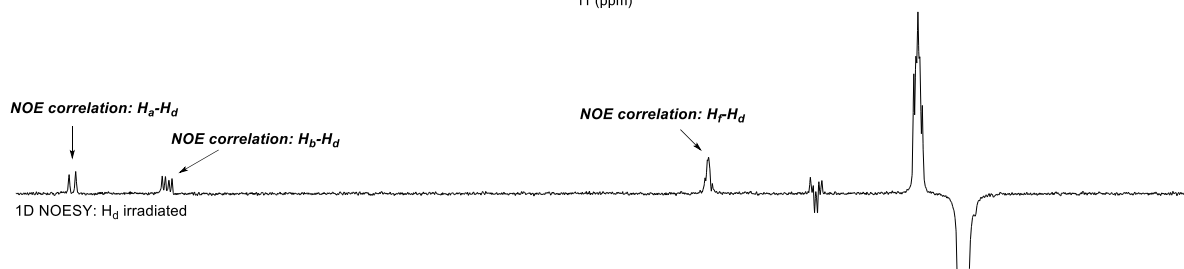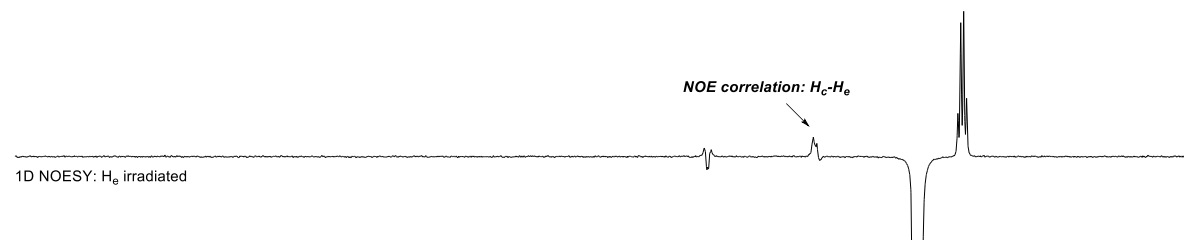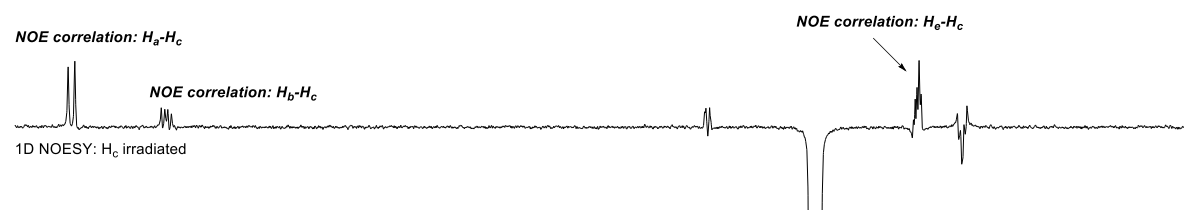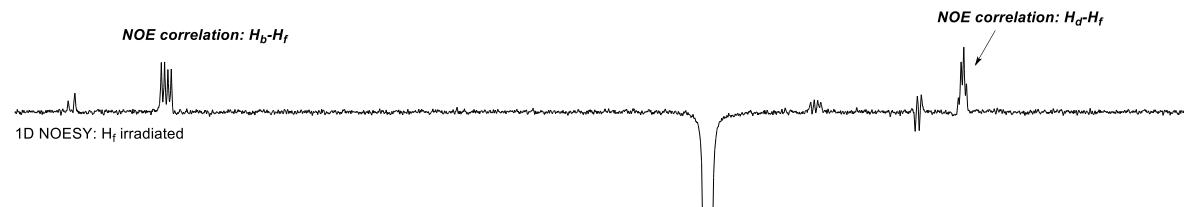

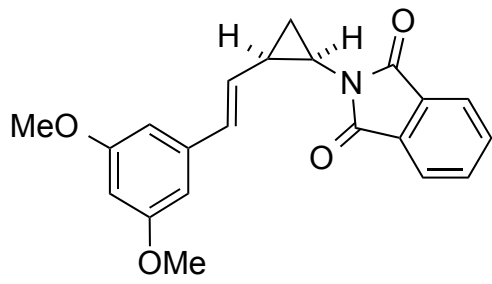

**6f**

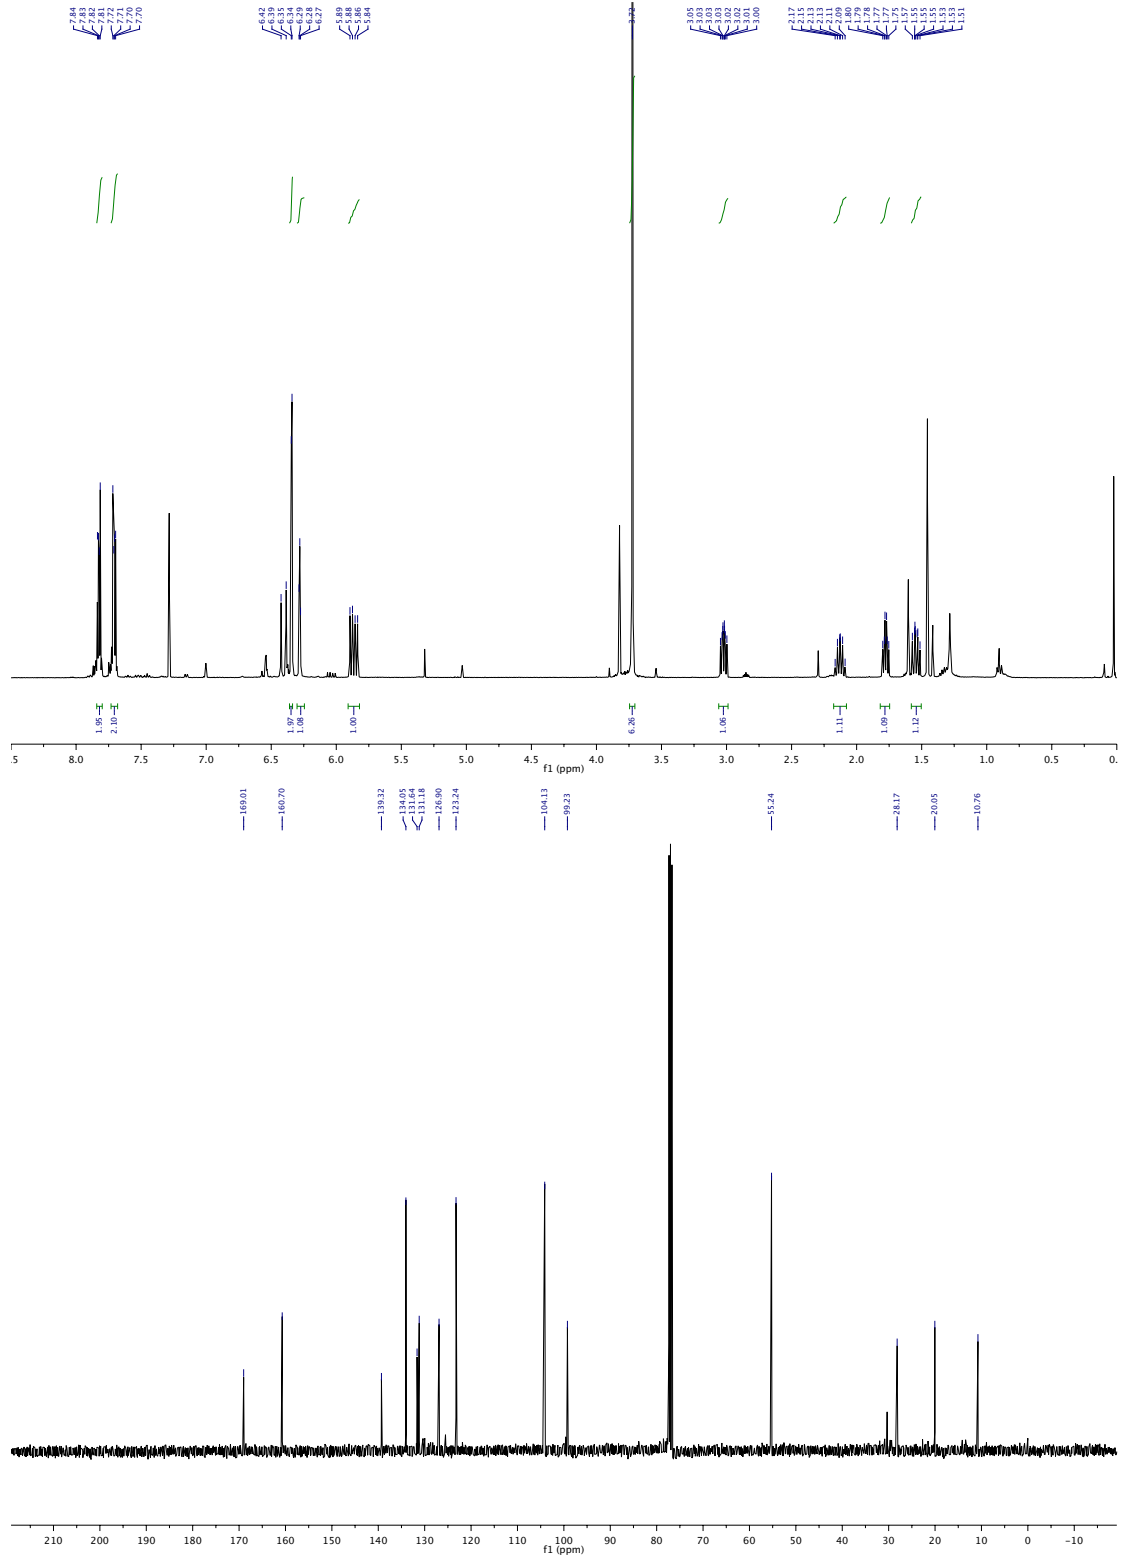



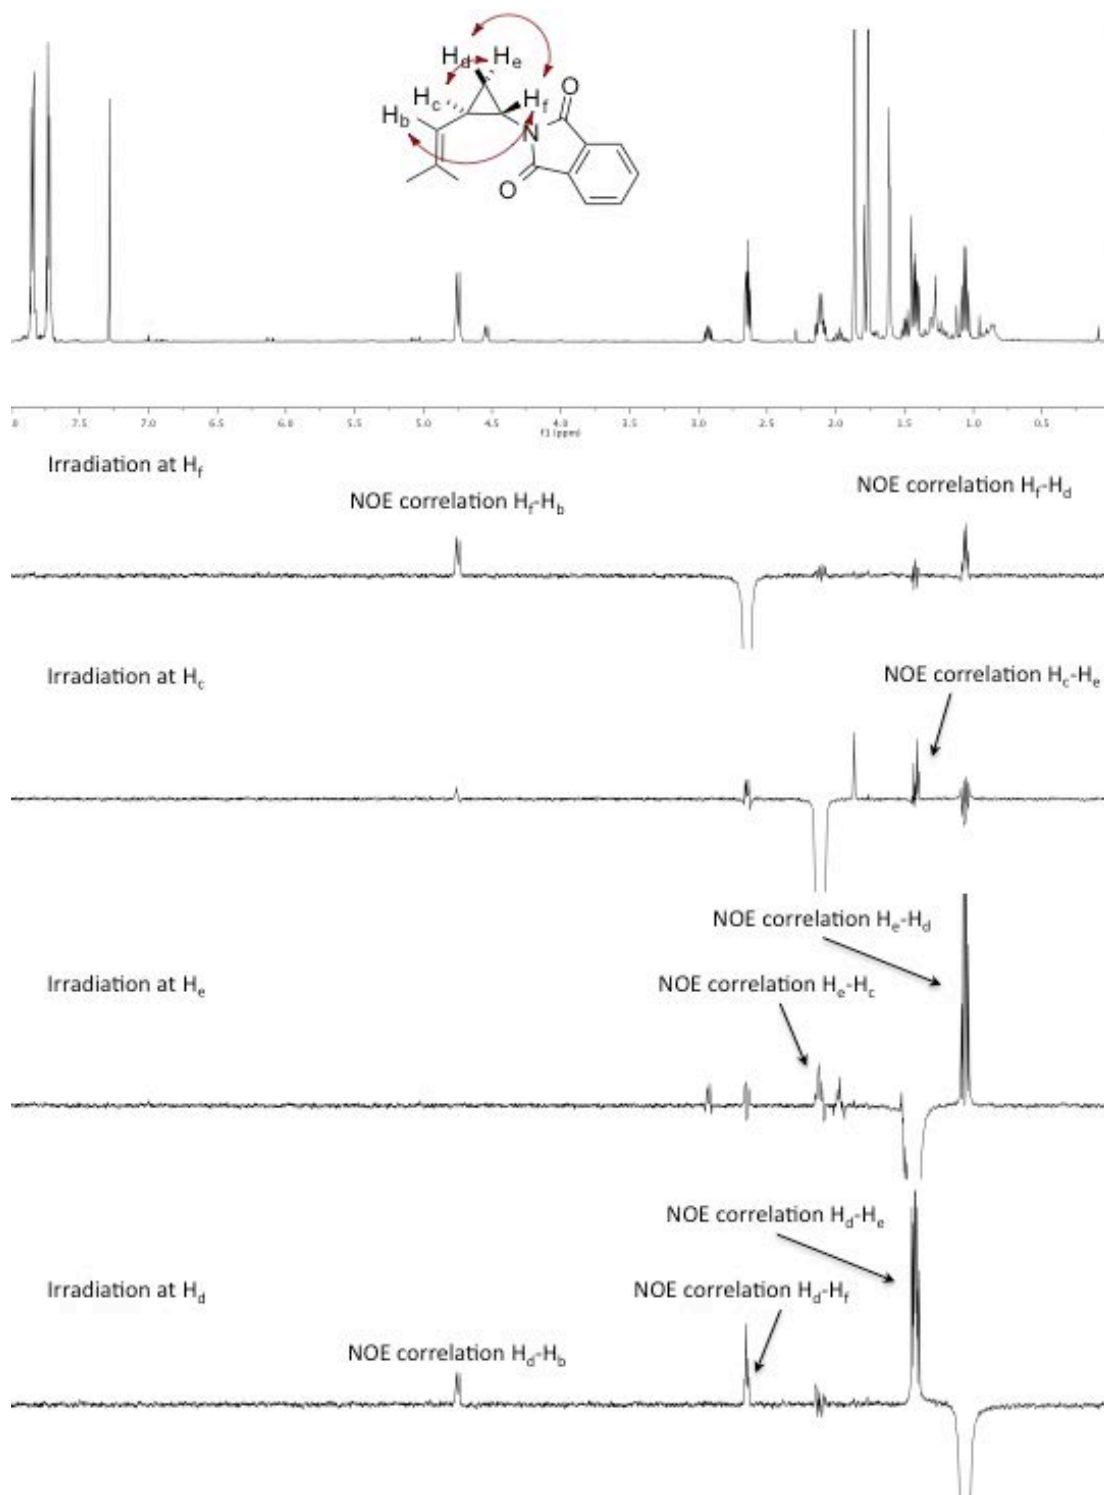

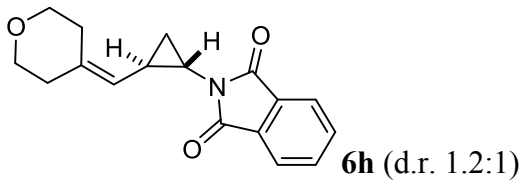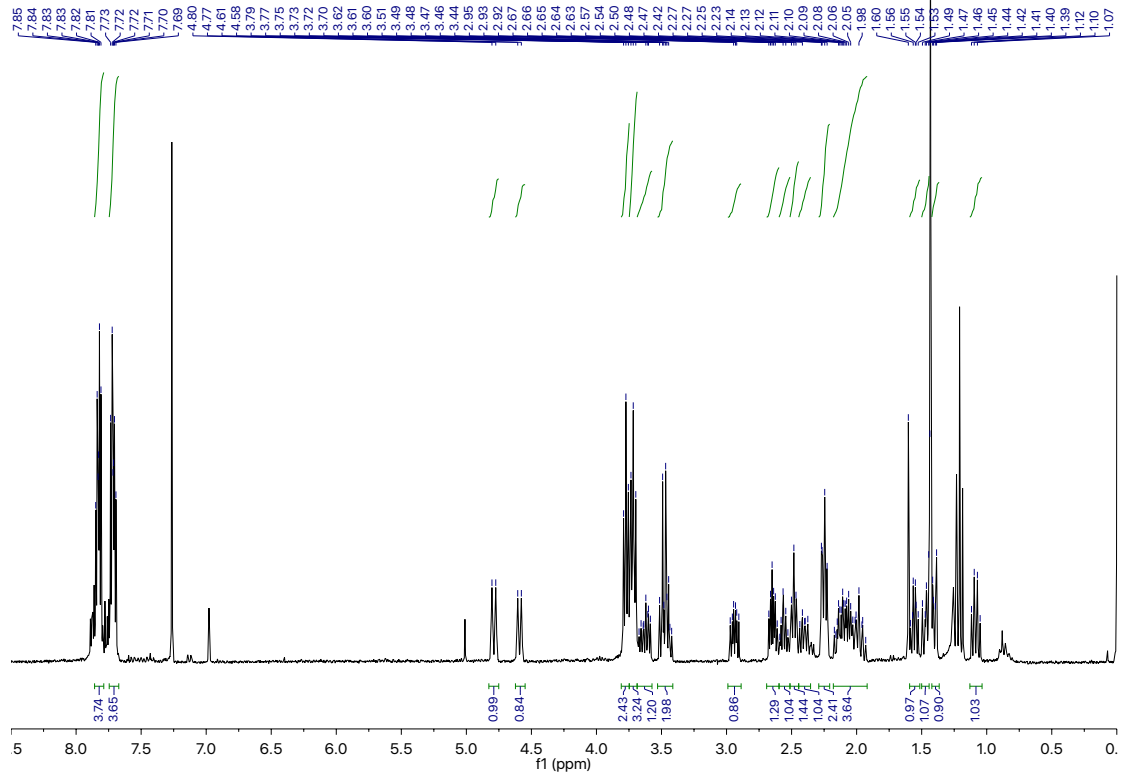





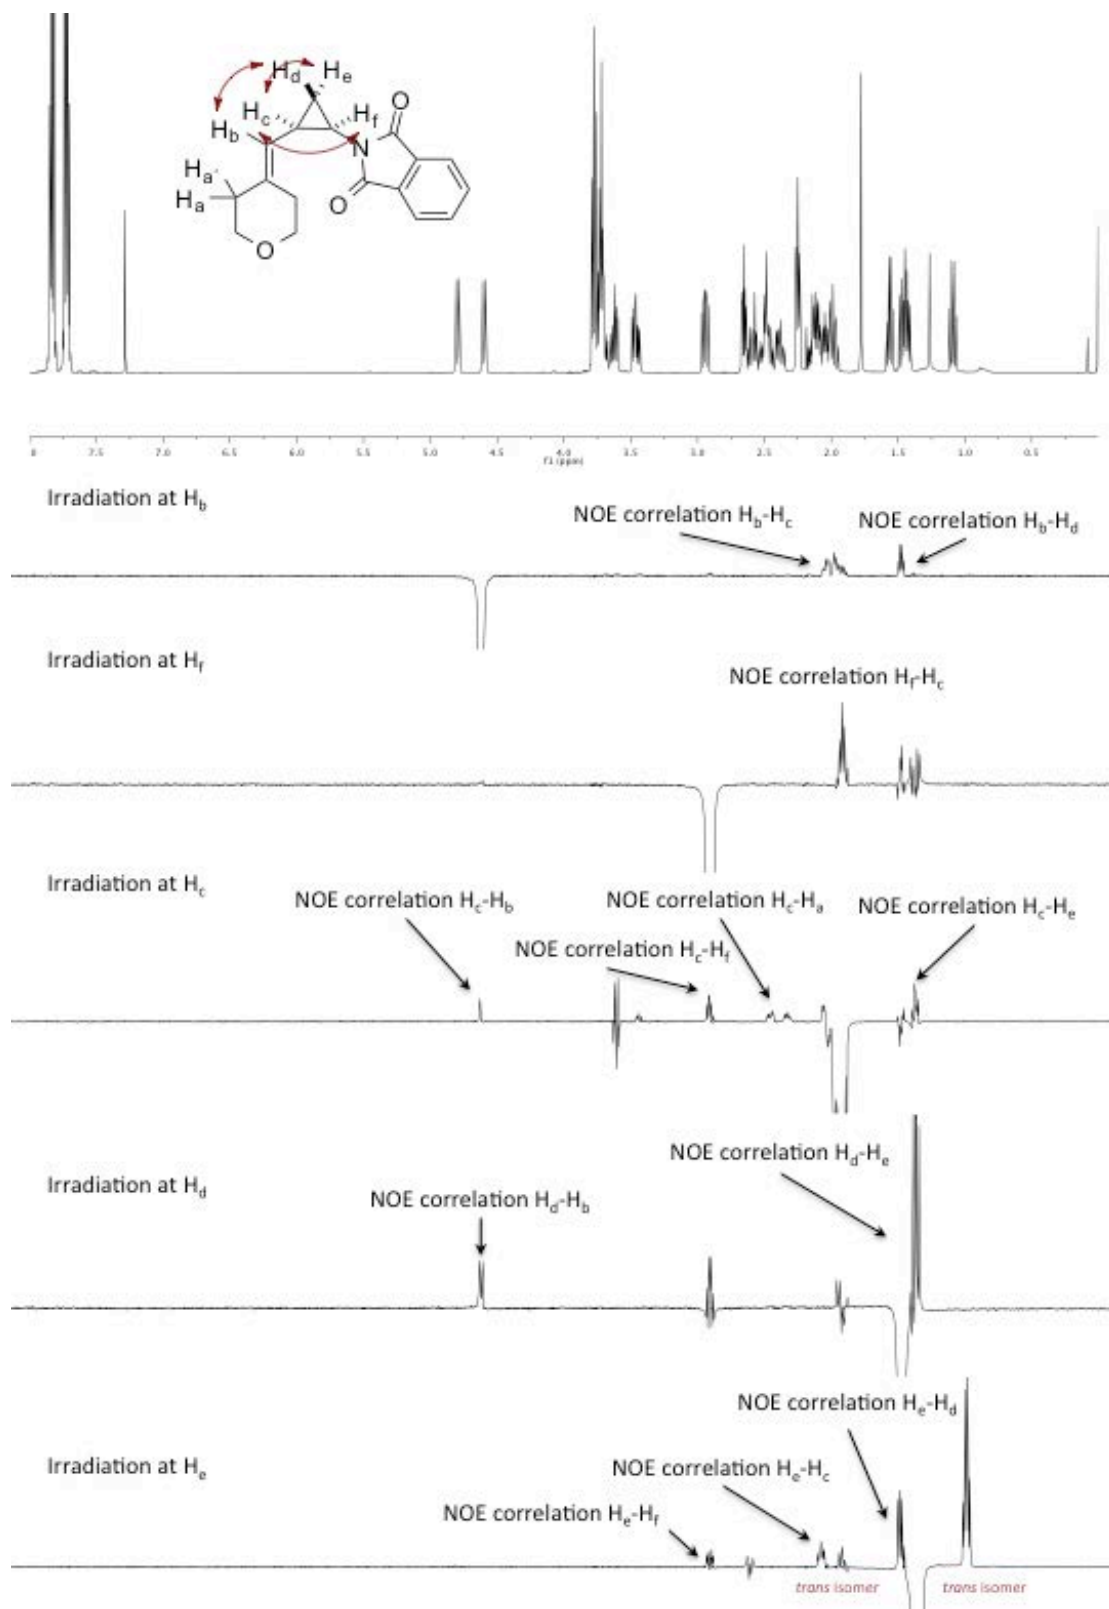

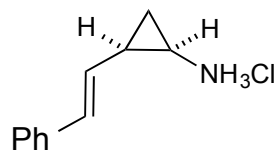

7

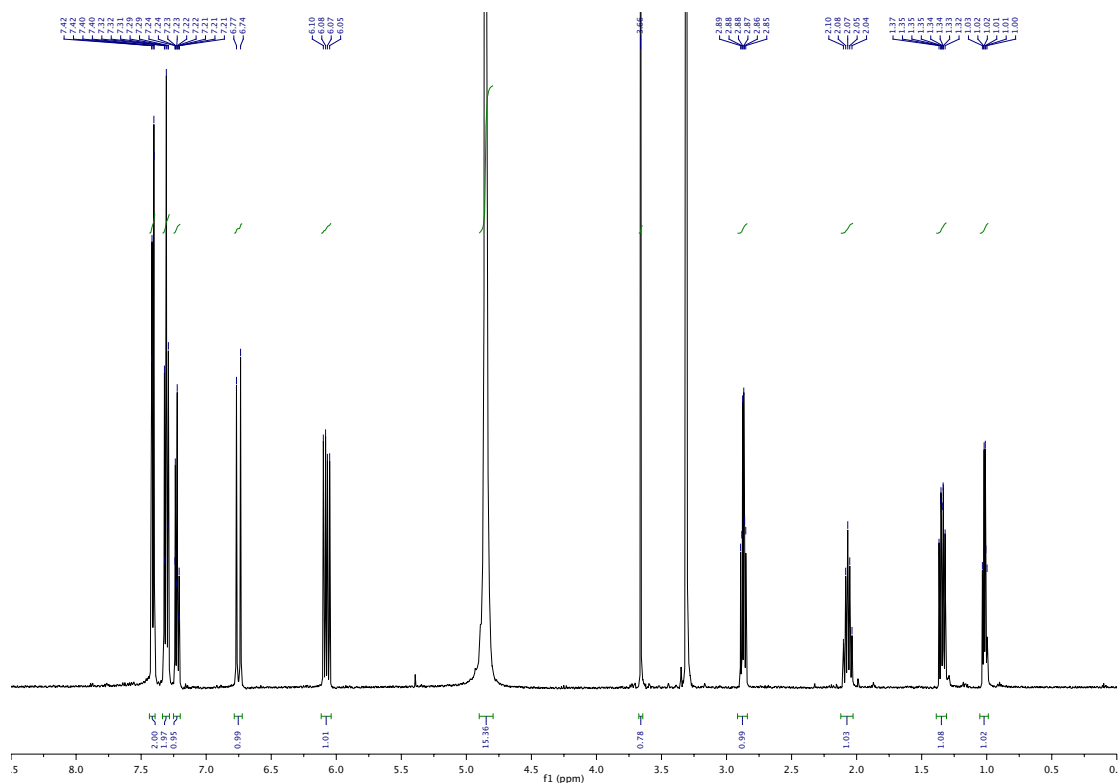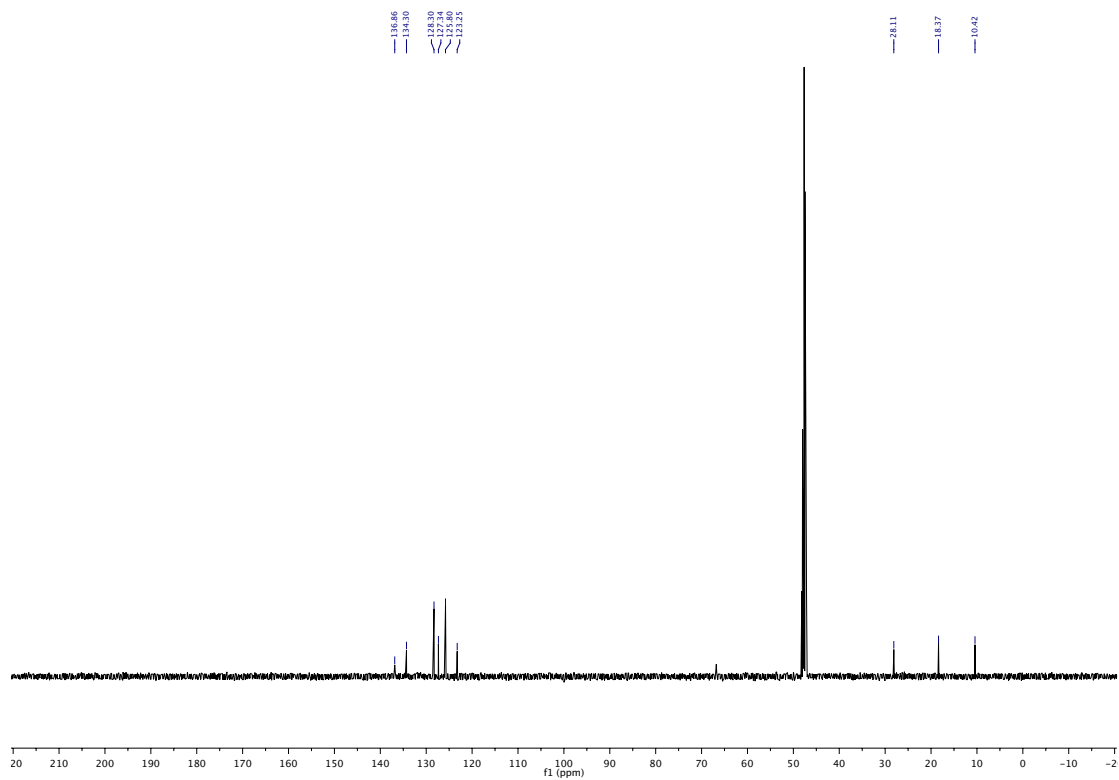

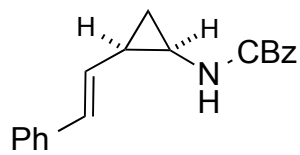

**8**

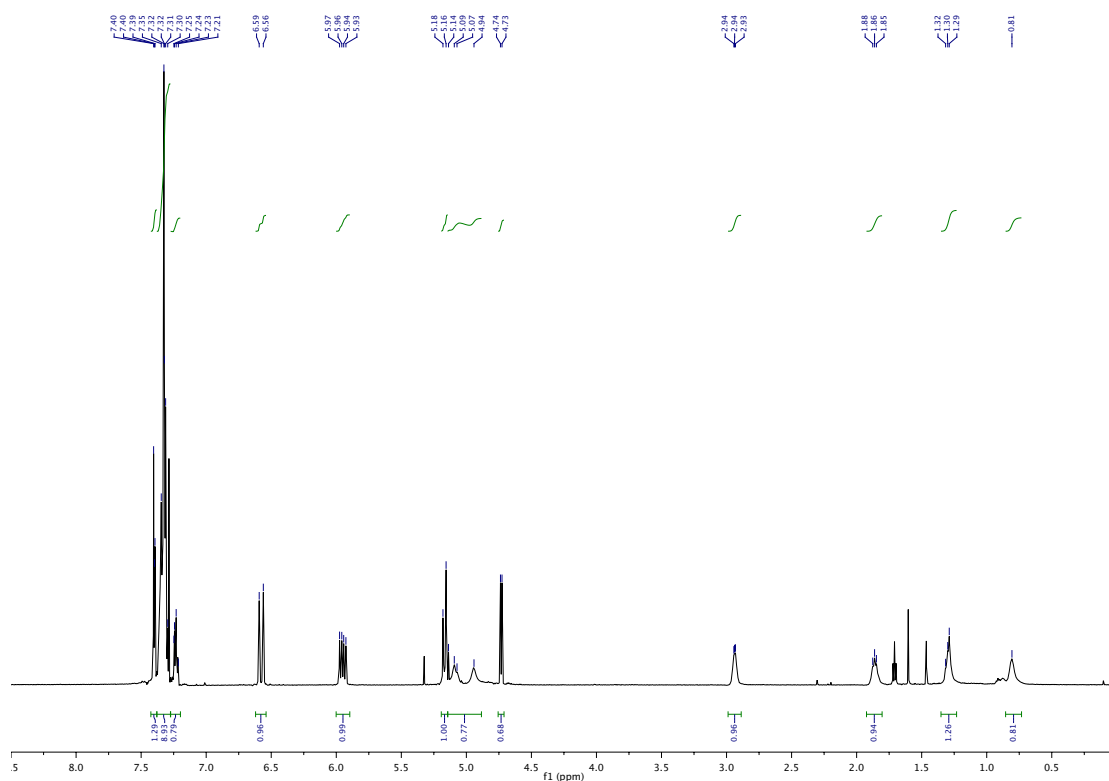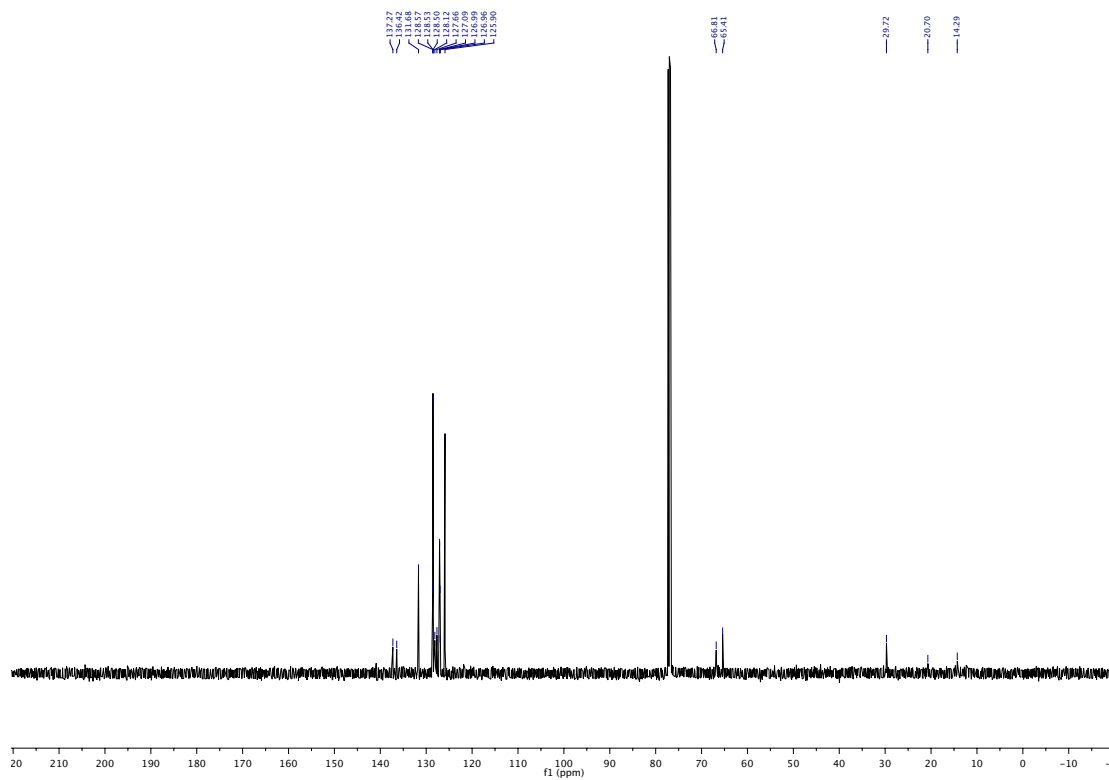

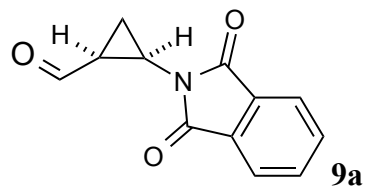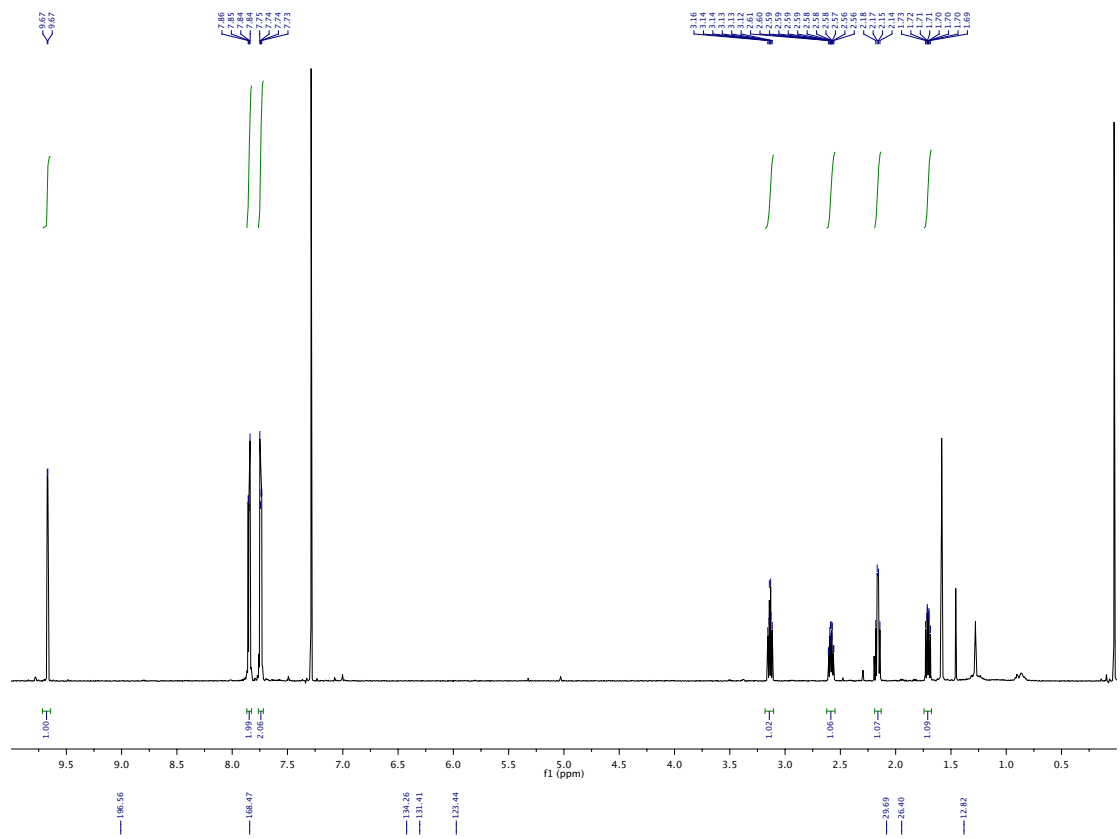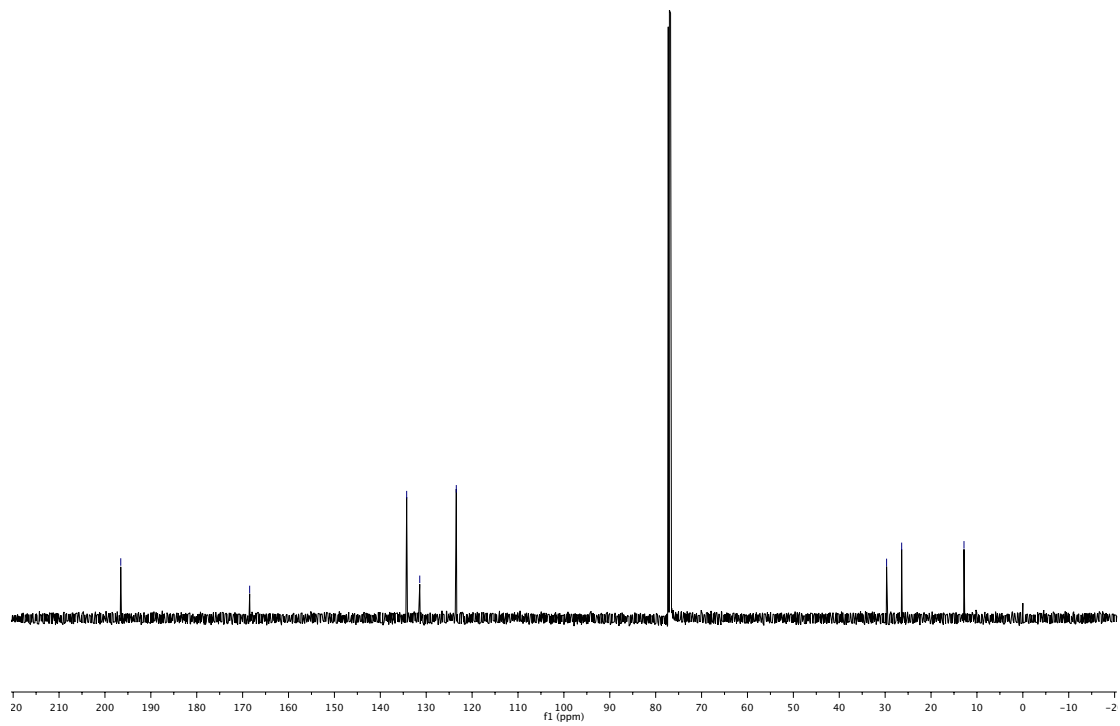

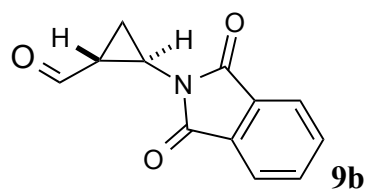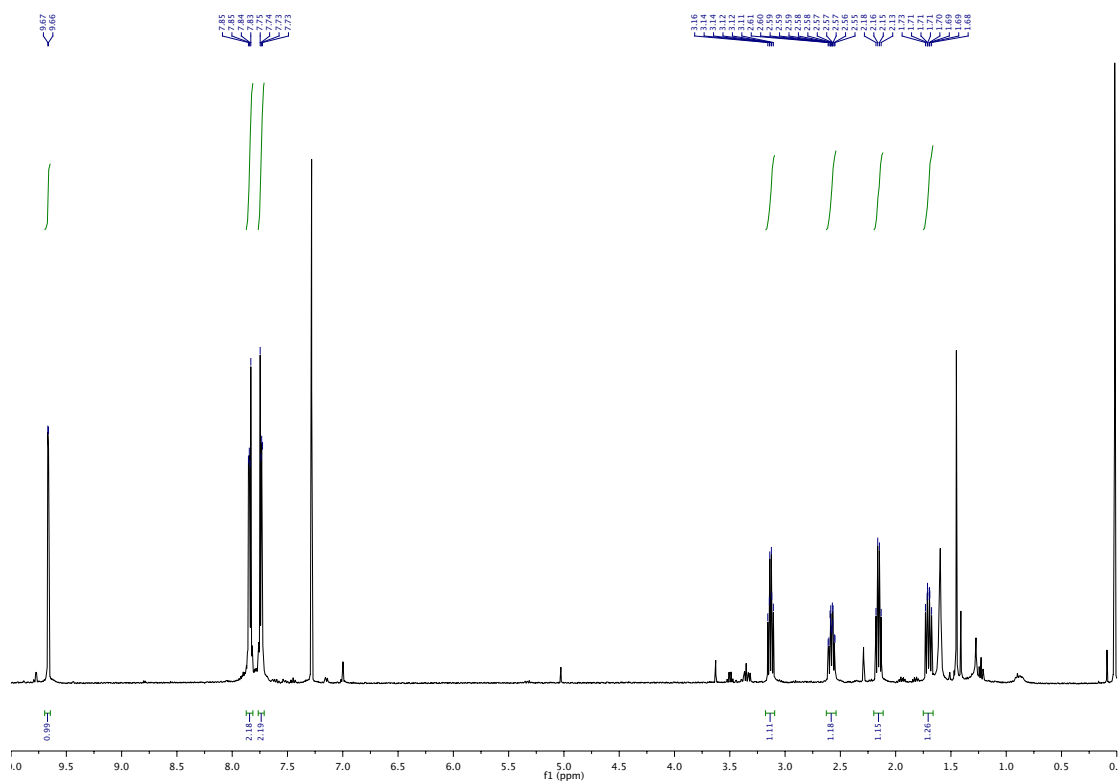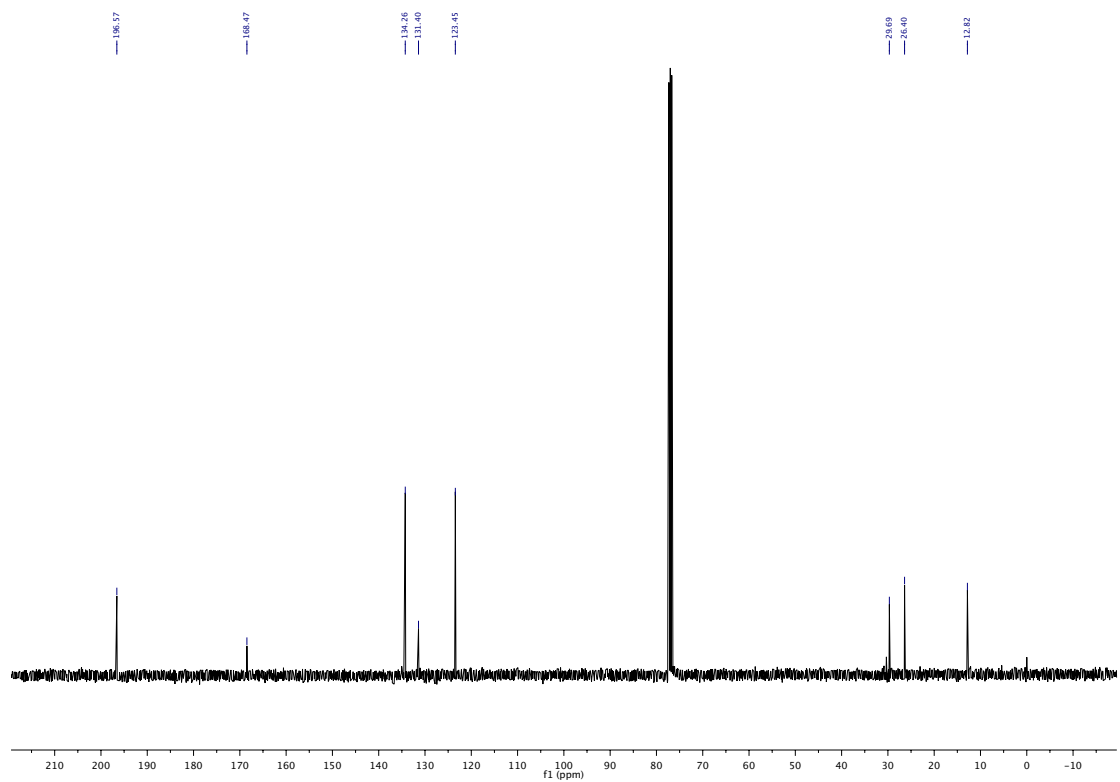

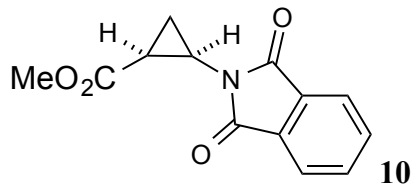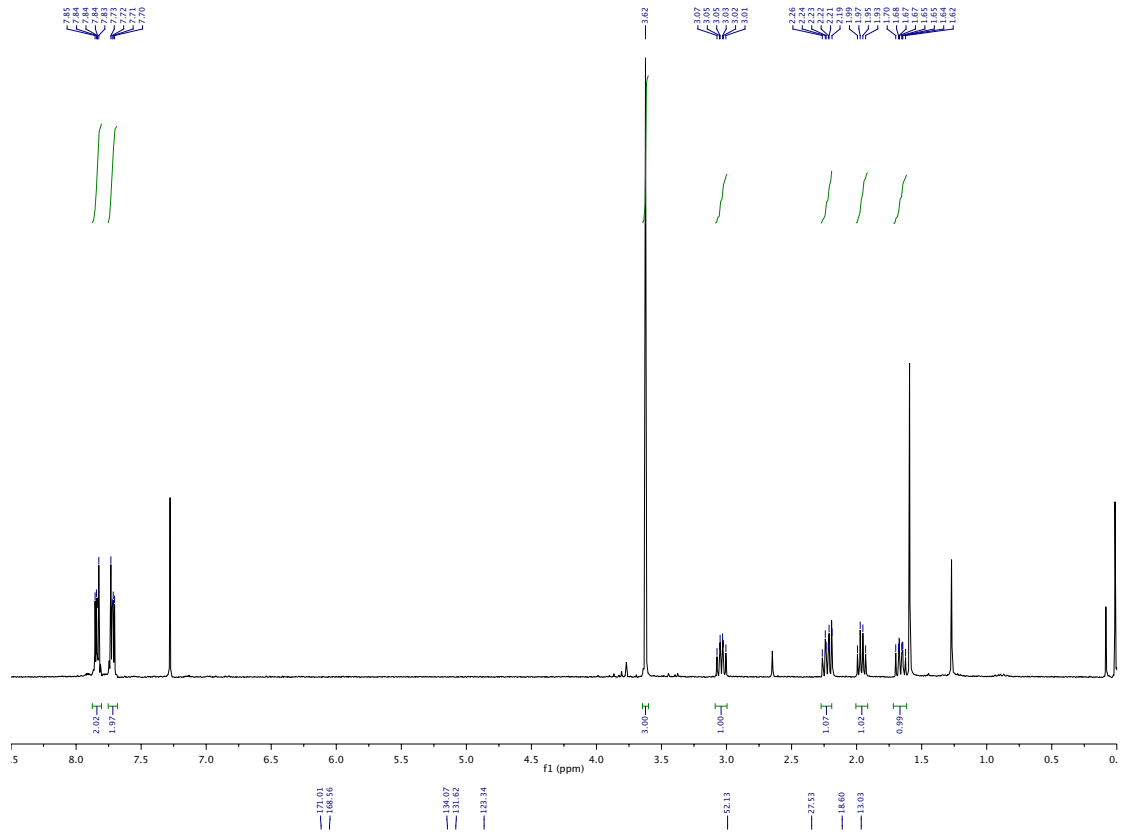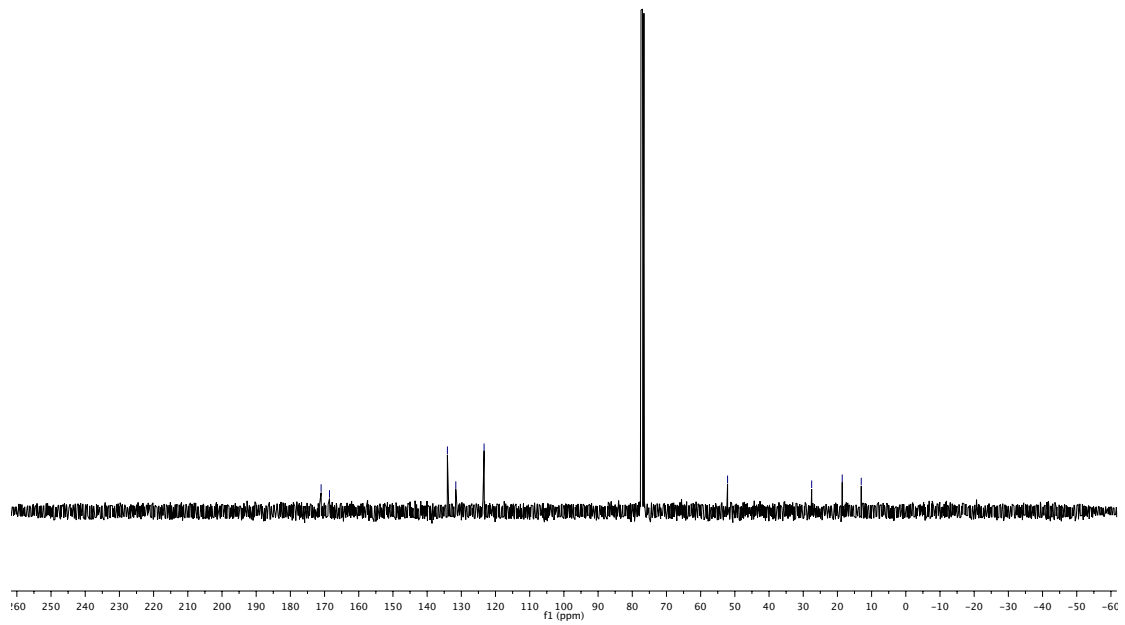

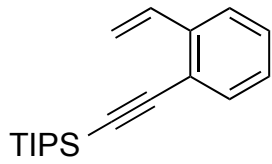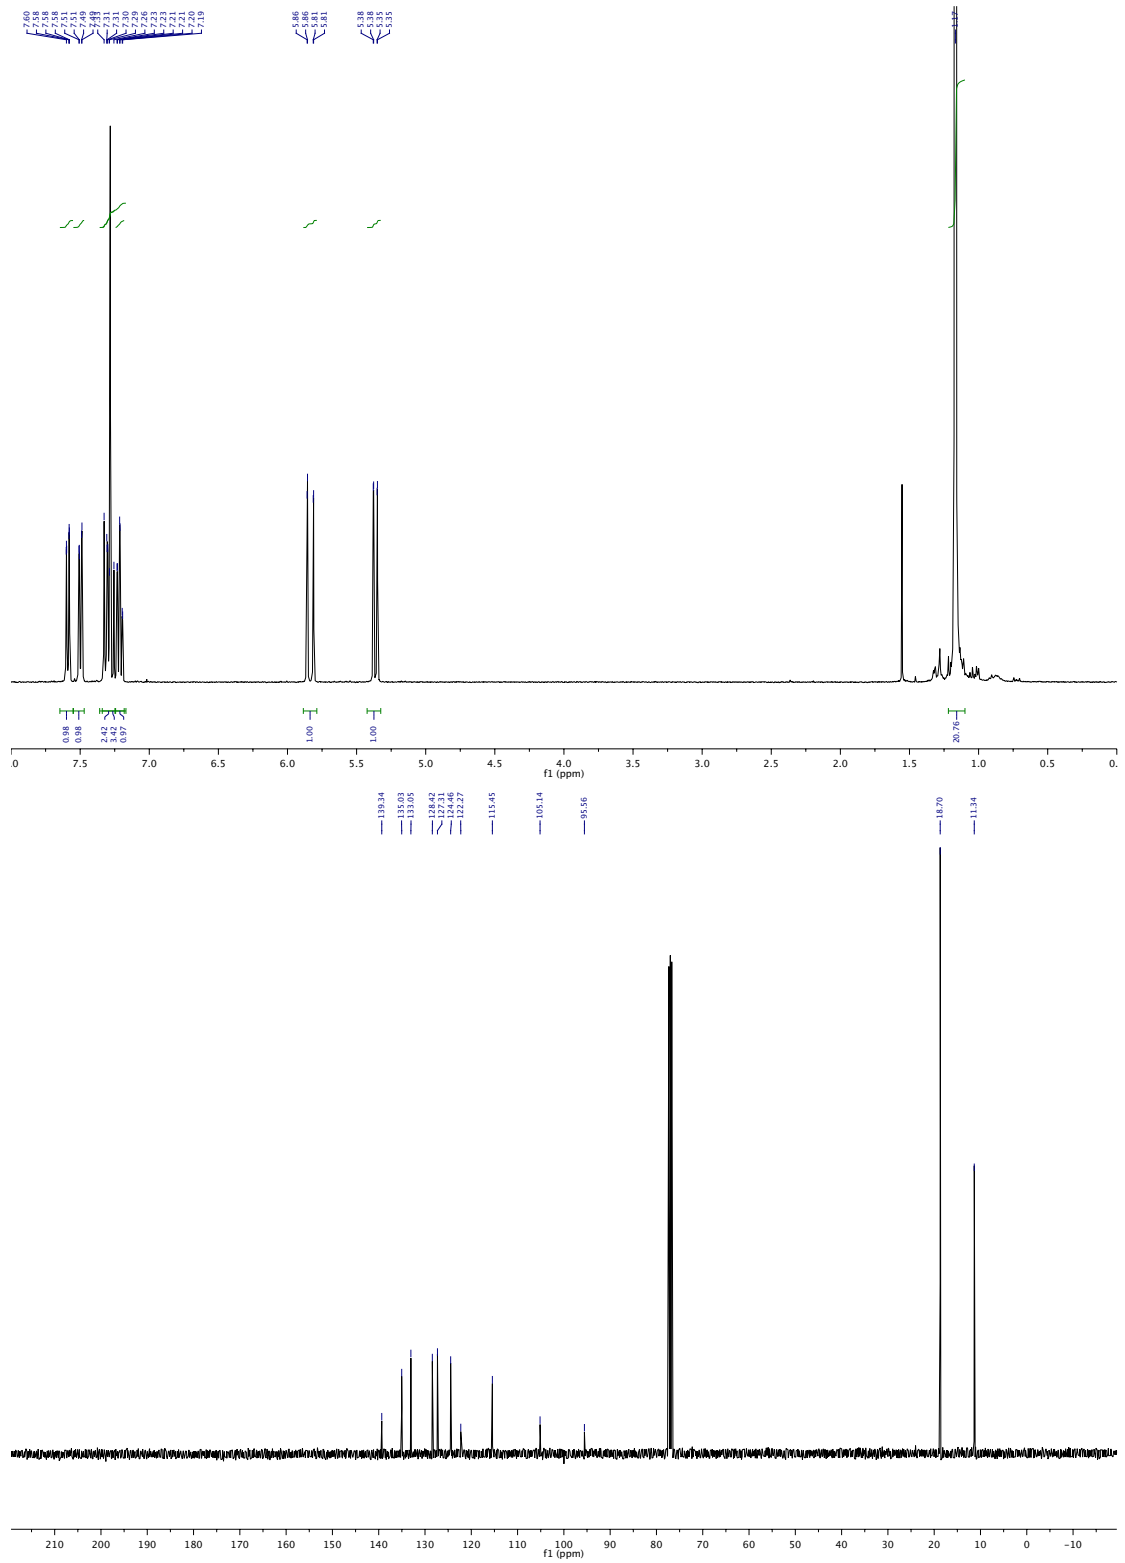



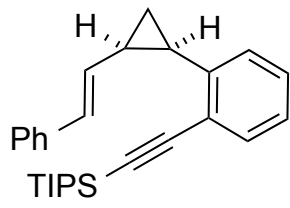

**12a**

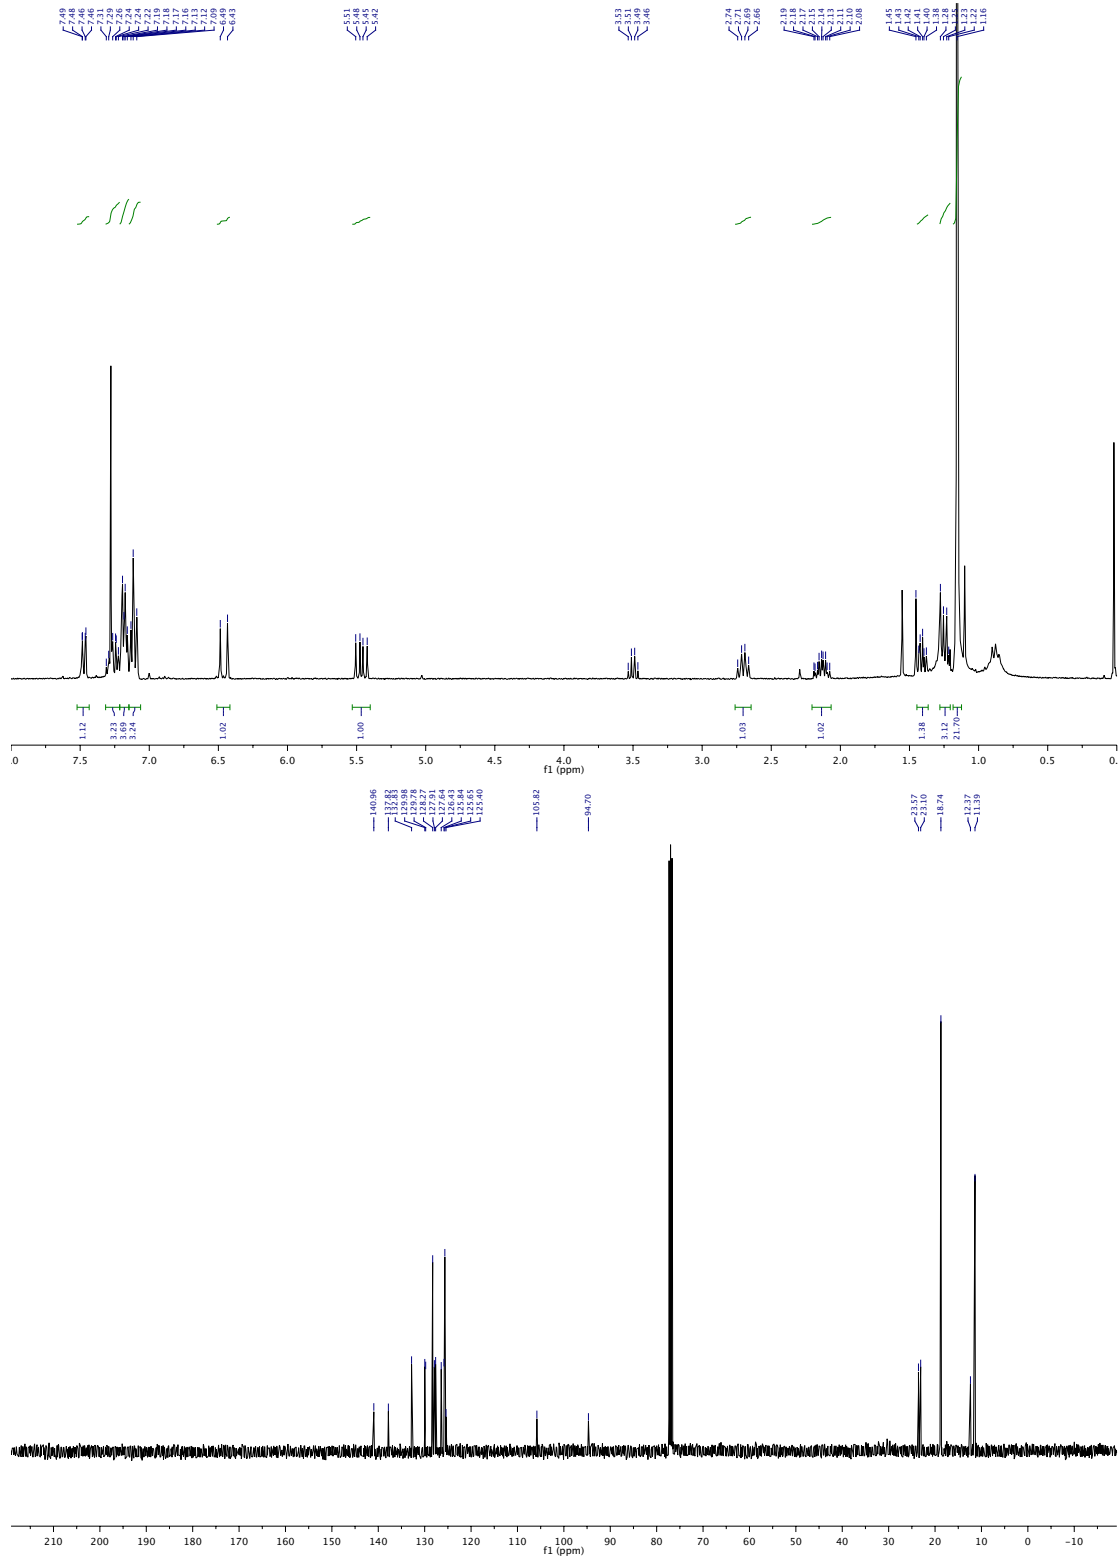

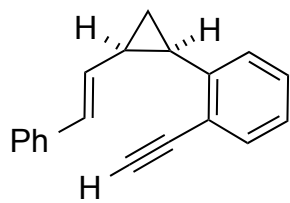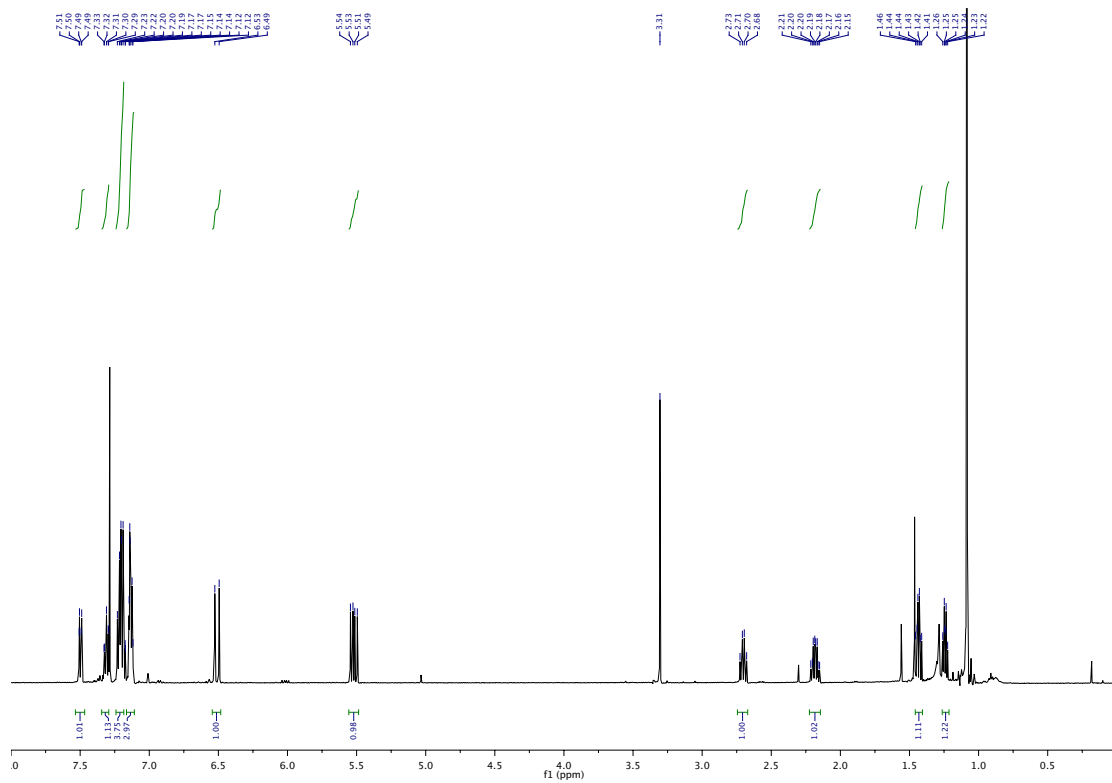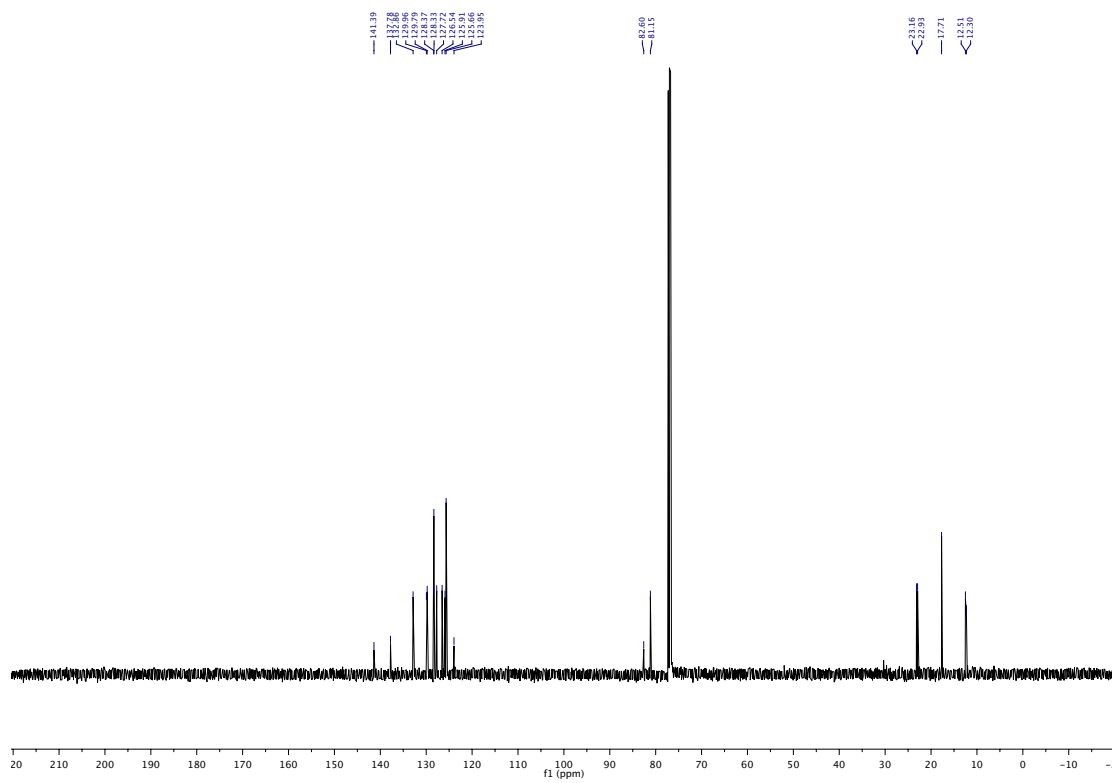

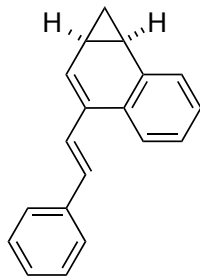

13

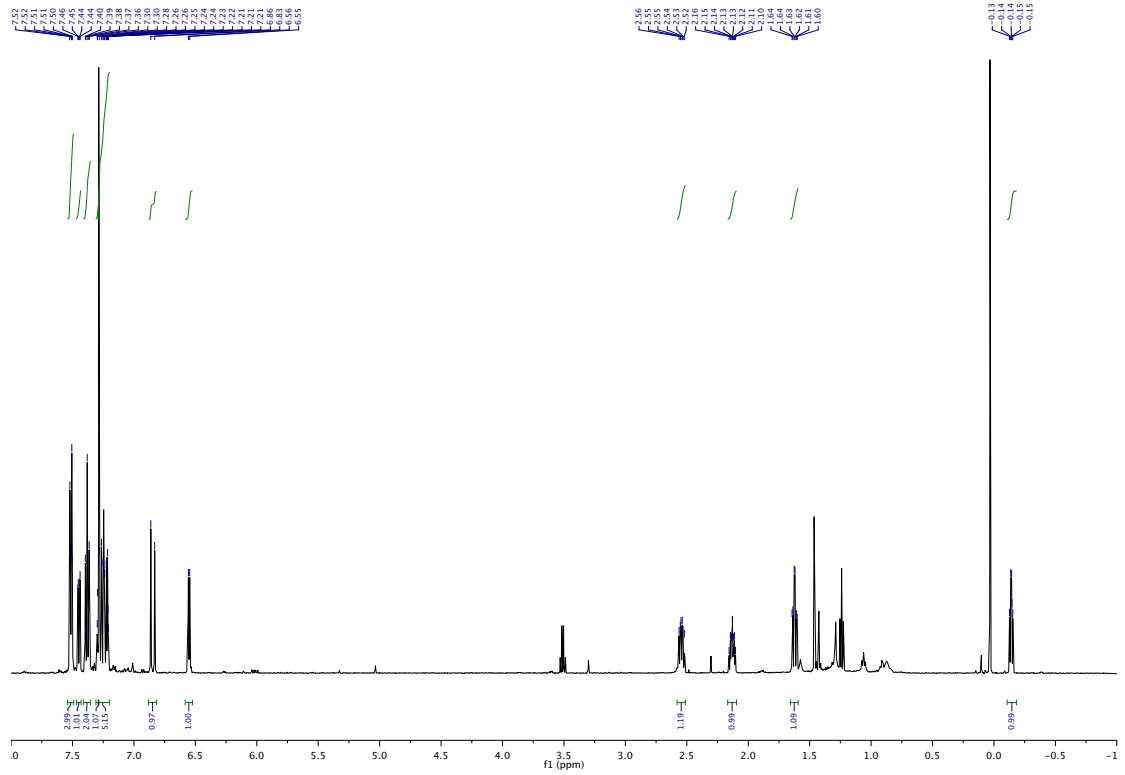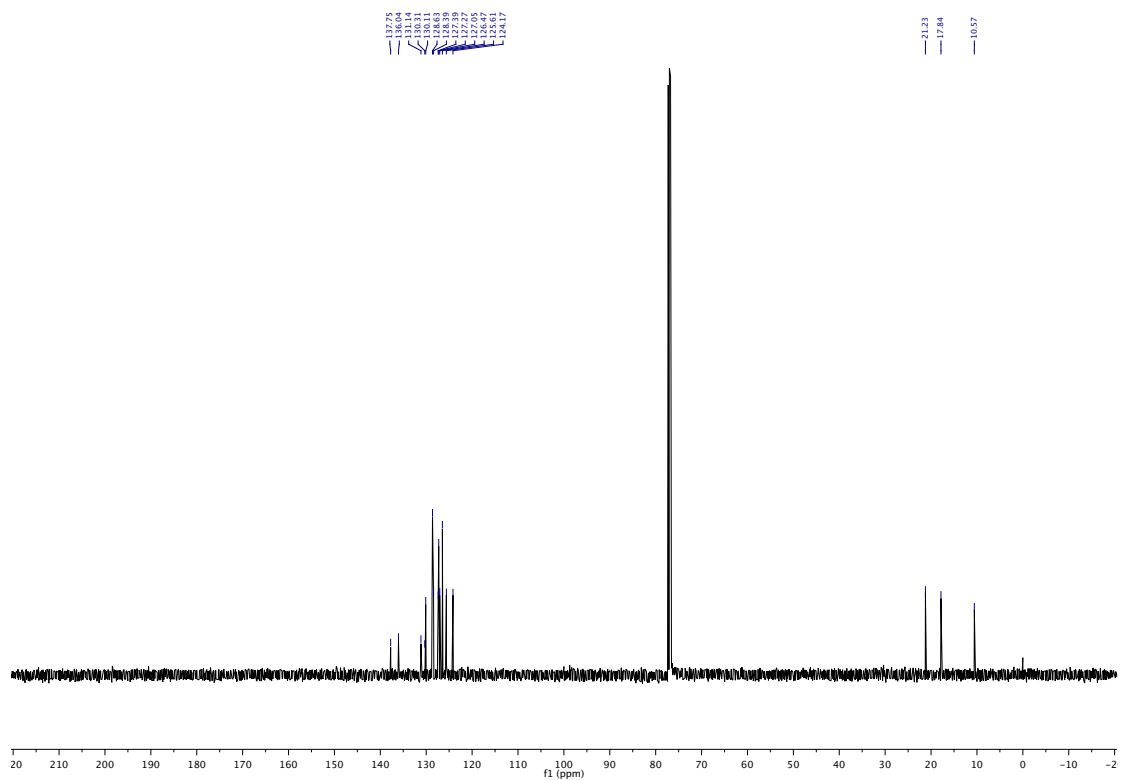

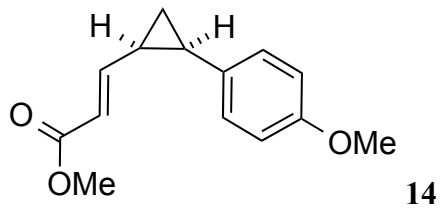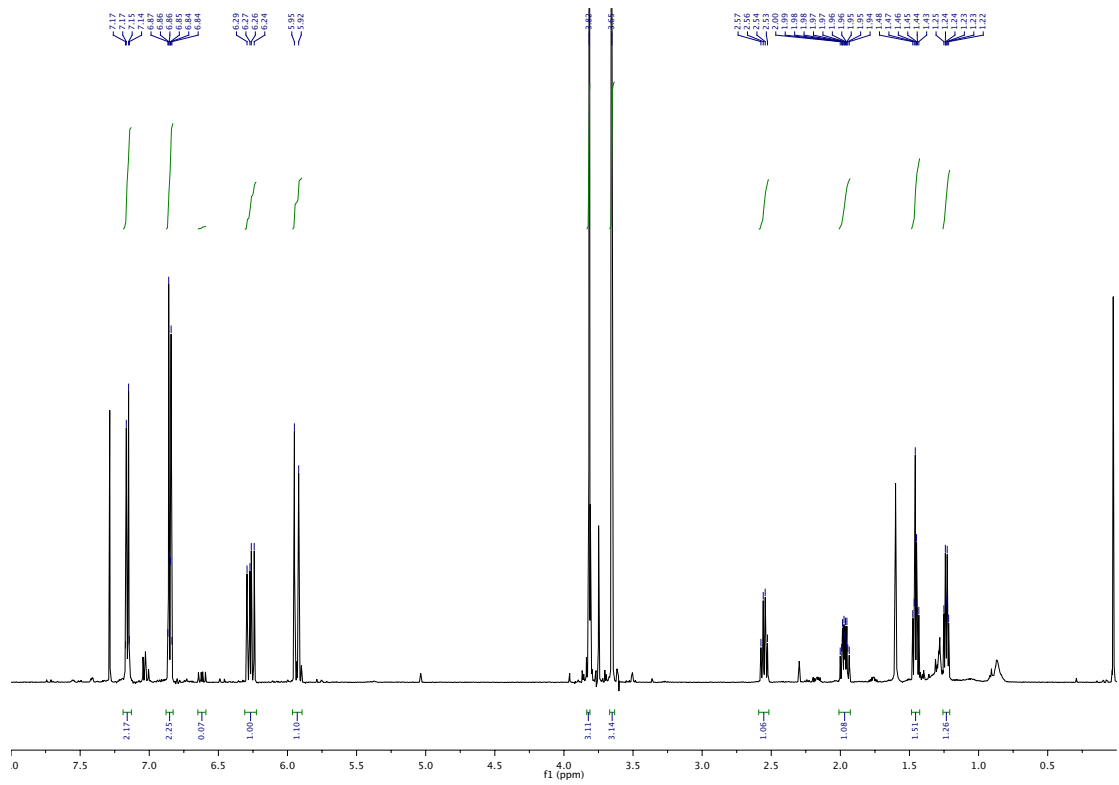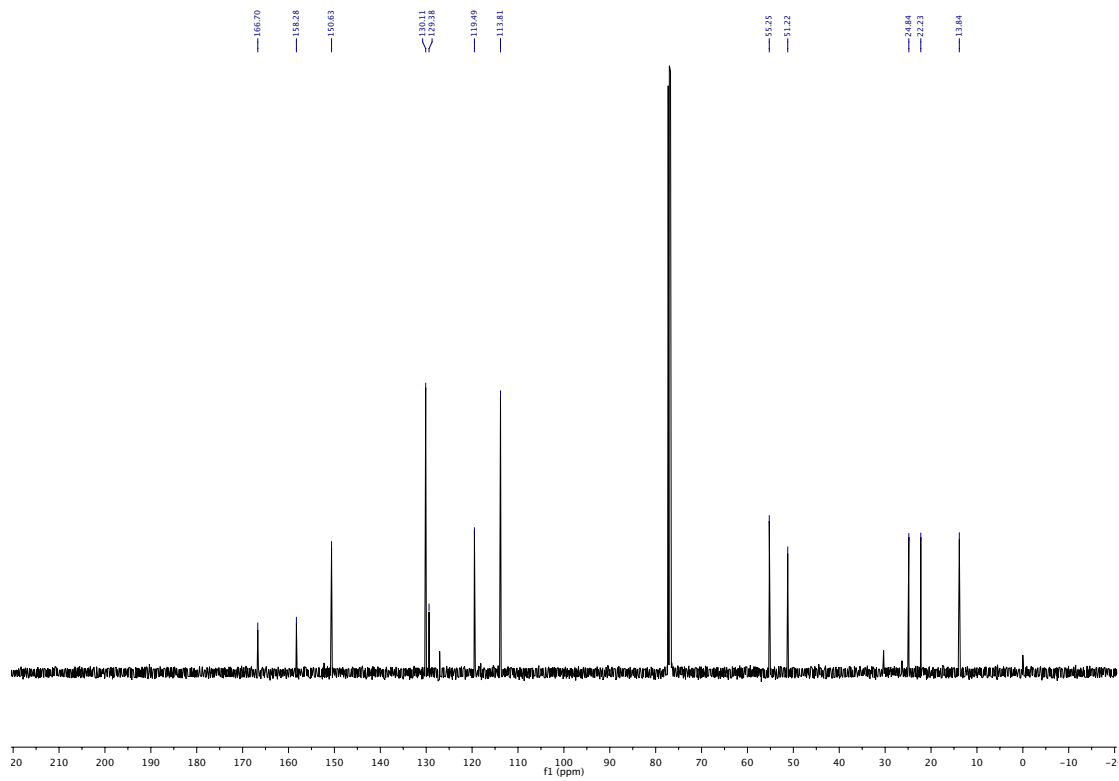

### 13. References

---

1. (a) Nieto-Oberhuber, C.; López, S.; Muñoz, M. P.; Cárdenas, D. J.; Buñuel, E.; Nevado, C.; Echavarren, A. M. *Angew. Chem. Int. Ed.* **2005**, *44*, 6146–6148. (b) López, S.; Herrero-Gómez, E.; Pérez-Galán, P.; Nieto-Oberhuber, C.; Echavarren, A. M. *Angew. Chem. Int. Ed.* **2006**, *45*, 6029–6032. (c) Amijs, C. H. M.; López-Carrillo, V.; Raducan, M.; Pérez-Galán, P.; Ferrer, C.; Echavarren, A. M. *J. Org. Chem.* **2008**, *73*, 7721–7730.
2. Solorio-Alvarado, C. R.; Wang, Y.; Echavarren, A. M. *J. Am. Chem. Soc.* **2011**, *133*, 11952–11955.
3. Murata, M.; Watanabe, S.; Masuda, Y. *J. Chem. Res.* **2002**, 142–143.
4. Presset, M.; Oehlrich, D.; Rombouts, F.; Molander, G. A. *J. Org. Chem.* **2013**, *78*, 12837–12843.
5. Parsons, A.T.; Senecal, T.D.; Buchwald, S.L.; *Angew. Chem. Int. Ed.* **2012**, *51*, 2947–2950.
6. Kwan, E. E.; Huang, S. G. *Eur. J. Org. Chem.* **2008**, 2671–2688.
7. Aissa, C. *J. Org. Chem.* **2006**, *71*, 360–363.
8. This substrate was obtained by formation of the ester: Anciaux, A. J.; Demonceau, A.; Noels, A. F.; Hubert, A. J.; Warin, R.; Teyssi, P. *J. Org. Chem.* **1981**, *46*, 873–876, followed by reduction to the alcohol: Kerber, R.C.; Ehntholt, D.J. *J. Am. Chem. Soc.* **1973**, *95*, 2927–2934.
9. In a separate experiment, the thioether intermediate was isolated in 80% yield. The quality of the hydrogen peroxide was found to be crucial in the oxidation step: when H<sub>2</sub>O<sub>2</sub> of inferior quality was used, predominantly sulfoxide was formed, which could be isolated and resubmitted to the reaction conditions to give the sulfone.
10. This compound was obtained following a literature procedure: Zhu, L.; Ni, C.; Zhao, Y.; Hu, J. *Tetrahedron*, **2010**, *66*, 5089–5100.
11. Lower yields were obtained for this compound due to the poor solubility of the thiol under the Mitsunobu conditions, which led to significant amount of homo-coupled alcohol product. In a separate experiment, this was overcome by adding a small amount of CH<sub>2</sub>Cl<sub>2</sub> to the reaction mixture. Again, the quality of H<sub>2</sub>O<sub>2</sub> proved to be crucial.
12. Alford, J. S.; Davies, H. M. L. *Org. Lett.* **2012**, *14*, 6020–6023.
13. Gopinath, R.; Patel B. K. *Org. Lett.* **2000**, *2*, 577–579.
14. Compound **12** is not UV active, nor can be made visible using TLC stains (KMnO<sub>4</sub>, vanillin, I<sub>2</sub>, bromocresol green, ninhydrin, phosphomolybdic acid, 2,4-DNP). The compound was poorly detected electrophoretic light scattering (ELS). We had to resort to GC-FID in order to detect the desired compound.
15. Yeh, M.-C. P.; Liang, C.-J.; Chen, H.-F.; Weng, Y.-T. *Adv. Synth. Catal.* **2015**, *357*, 3242–3254.

- 
16. This compound was obtained following a literature procedure: Madhushaw, R. J.; Lin, M.-Y.; Sohel, S. M. A.; Liu, R.-S. *J. Am. Chem. Soc.* **2004**, *126*, 6895–6899.
17. Chatterjee, A.K.; Choi, T.-L.; Sanders, D.P.; Grubbs, R.H. *J. Am. Chem. Soc.*, **2003**, *125*, 11360–11370.
18. Marenich, S. A. V., Cramer, C. J.; Truhlar, D.G. *J. Phys. Chem. B* **2009**, *113*, 6378-6396.
19. Frisch, M. J.; Trucks, G. W.; Schlegel, H. B.; Scuseria, G. E.; Robb, M. A.; Cheeseman, J. R.; Scalmani, G.; Barone, V.; Mennucci, B.; Petersson, G. A.; Nakatsuji, H.; Caricato, M.; Li, X.; Hratchian, H. P.; Izmaylov, A. F.; Bloino, J.; Zheng, G.; Sonnenberg, J. L.; Hada, M.; Ehara, M.; Toyota, K.; Fukuda, R.; Hasegawa, J.; Ishida, M.; Nakajima, T.; Honda, Y.; Kitao, O.; Nakai, H.; Vreven, T.; Montgomery, J. A., Jr.; Peralta, J. E.; Ogliaro, F.; Bearpark, M.; Heyd, J. J.; Brothers, E.; Kudin, K. N.; Staroverov, V. N.; Kobayashi, R.; Normand, J.; Raghavachari, K.; Rendell, A.; Burant, J. C.; Iyengar, S. S.; Tomasi, J.; Cossi, M.; Rega, N.; Millam, J. M.; Klene, M.; Knox, J. E.; Cross, J. B.; Bakken, V.; Adamo, C.; Jaramillo, J.; Gomperts, R.; Stratmann, R. E.; Yazyev, O.; Austin, A. J.; Cammi, R.; Pomelli, C.; Ochterski, J. W.; Martin, R. L.; Morokuma, K.; Zakrzewski, V. G.; Voth, G. A.; Salvador, P.; Dannenberg, J.J.; Dapprich, S.; Daniels, A.D.; Farkas, O.; Foresman, J. B.; Ortiz, J. V.; Cioslowski, J.; Fox, D. J. *Gaussian 09 (Revision D.01)*, Gaussian, Inc.: Wallingford, CT, 2013.
20. Legault, C. Y. *CYLview*; Universite de Sherbrooke: Sherbrooke, Canada, 2009; <http://www.cylview.org>.
21. Lu, T.; Chen, F. *J. Comp. Chem.* **2012**, *33*, 580–592.
22. Glendening, E. D.; Landis, C. R.; Weinhold, F. *J. Comput. Chem.* **2013**, *34*, 1429–1437.
